# Supplementary material for: Designing realistic regulatory DNA with autoregressive language models
Source: HighWire-hosted journal article supplement (doi:10.1101/gr.279142.124), 2024-09-01
Supplement: Supplemental_Table_S1.xlsx [file Supplemental_Table_S1.xlsx]

## Sheet: Supplemental_Table_S1
	Sequence	label
gen_0	GTCTGCCTTTATCTAGACAGGTCAAGTCATAATAAATTTGGGTAAGGAAATTAATAGCTTGGTATTATCTTGAAGGGCTG	00
gen_1	AAATAGAATGGGACCTTTCCACAGTGGGAGGGTCTCCCCTAAGCGATGTTCGCTAAACTCAACGACCAATTGTGCCCGAT	00
gen_2	TTTGAGAGATGATGACGGTCGCAACTGTTTAAGATATCTACGTTTGTGATACGTCCTTTAGATATTATAGTACCTTCGGT	00
gen_3	GATAAACGAAGTCGTTGGGTAGTCCTGTATGACCTCTTCATGATATATGATAGAAATTAACGACCTTAGGTTTATACAGA	00
gen_4	TAATGGGGAACTTCATAGCAATGACAATTATAGTGTATTTGAACACTGTGTTATCACCTAAGGCGGTCTATCGTGGAACA	00
gen_5	TGCGAATGTTTAGTAGCTAACAGCTTAGCACGTGAATGCACATTGCCTTAGTTTCTAGTAGTCTGAGATCGGTTATCTGA	00
gen_6	GAGATGAGGCAATCCCCGAATGGTTTGCTTCTTAATAGGACCGTCAGTTTTGATAAGCTAATGTAGGTCTGATACTTAGA	00
gen_7	ATCATGATGTGCAGCTAACCTTATGCAGTACTATGTTCCTCCCATTTGCGTAGGTGAGTTTGCAGCGTGCGAGTGTTTGC	00
gen_8	TAAAGGAACTGCCTTAATTAATAGCGGCGAATAAGCCTTGTTATCACTTTCAGGTTTGTAGTGTGACGCTGATAGGTCGA	00
gen_9	CCTCTGGGAGTCCCATAGTTTACACAGCTAGTTCTGCGGTCGTTAGTAGCGCTGGGGTGTTTAACCTACCCCATTAGGGC	00
gen_10	CTCAAGATTGTGATAGTTGTTCGCTTCAATATGTCCTCAAGTGTATATGTAGAATCGCTCGTTCTTGCGTAATTCGGTGA	00
gen_11	ATTTGAGTATTAGTCTGATGCGGACTCGTCACTTCTTCAATCAAGCTAAGTGGCGCTGAGCTTTCGGACCTGAAGATCGA	00
gen_12	TCATTAGTTAAAAGCTCTTAGGATGGGGTGTAATTCTGGAGATATTTAGTGTGATTTACCAATGAATACATAGTATGTGT	00
gen_13	TGACCGCCTGGGAAGATACATGGTCGAACTGGTCGAACGGAATAAGTGAACGTTCGTGAAGGCTAAGGACTTCTTGGTTT	00
gen_14	ATATTGTGAGAGCCTTTGGCTTAGCGGGCTGCCTTATTCATGAACTTGTTATCGTGAGAGATTGGAACCAGGTTGTCAGA	00
gen_15	TTTGGCGGTTATGTTCAGTCCCTGGTAGATGATCCACGAGTTCGAAGAATATCCGTGTCAGGCCCCGTCAGGTTTTTAAT	00
gen_16	AAAGTTCTTTACCGATCTGGCTGTTACGTGTGCAGAGTTCGGGTACGACCTATCGAATTCCAGATTAATTTGCACTTTGT	00
gen_17	AATTAGTACCAACGTGAATCTACCGTTGCAATGTGATTTAGGAGCAAGGCAGAGAGAACGTTATACTTAGAAGGAAAGGT	00
gen_18	TGTGCTGGTGATCTAACGTGGGGACTGGTTCAATTGTGTCTGTTGGTCCAGGGTTGTTCTATCAAAGGATGGGTCCGAGC	00
gen_19	TGGTGGGACCCTTTATGTACTTGTGGTACGAGCCCATCTTCAGGACAAGCTGTGGGATCAGGCTGCACGGTGGGTGCTCA	00
gen_20	CAAACTGCTACTCGCCGTTTGCAAGTAGTGTATAGAGTTCATAATTTTGTTCAATACCACCCGTTGGGGCCAAAGTACGA	00
gen_21	AATCCATGTTGGGGTCTCGATCTTTTGCGTGGCCTTTTGAAGATCTAATGGATTTCATGGGCCTAGATGACTCTGCCTAA	00
gen_22	TGTCGTTATAACCACCAAATAGAGCTCGGCGTAAAACGTCAGGCTTTTTATGACATTGCAGTGCTGGTTATGGGTAATCT	00
gen_23	TCGTAGTCGCTGCCTCGGTTTAAGCTGTATGAGTATGGCCTTTACGGTCGTGTGTGTGGTAGTTAATGTATGGGGGCGCA	00
gen_24	TGAACGTAAAACCTTTAGCTAGGTATGGGGGGAGCACCGTGATATAGGGATATCTAGGATGGCATGGCGTGGTCCTGGGC	00
gen_25	TTCAGGAGTATGCGATTCAAGTCTTATTATCGATTACCTGGGTAGGTCTGTAACATCGTTGTGTTGTAGCATATGCTAGA	00
gen_26	CCTATTTGGATGGCGTCACTGGTCTGCTTTAAGCCACGAGCCAGATCAGGAGACCTCTGTGGAGGTCATGGTTGCTTCTA	00
gen_27	AGACTTGGCACGTTTTACAGAATCAGTTAGCATTGTGGAATCCTATTTCAGTGTTTAGTTTGATATGTTTCCGATTCTTC	00
gen_28	GTAGAGAGGGTCGTAAAGCGATCTTTGGGGTAAGCAACTGGAAGTAATGGATCATTAGGGATAGGAGTCGCCTATAAGGG	00
gen_29	TCGCTAGGTGAATTCTATTCTAGCTTTATTTTGGGTTGTTTATGGAGTGGAAAGCTTACGGTTGAGAGCCTTTCACACGT	00
gen_30	TAATAGAGGGTCTCAAAGTGTTTGAGTACGATAATATATCTTTCGGTGCTGTGTTGGGTAGGCCGGAGGGGCTGTGTGCA	00
gen_31	TAGGCAAATTGTCATACTCCAAAGTGGAGATCGTTCTTATTAGTTGTATTTAGTCGTGCGTAGGCTATTTTTGCATAGGT	00
gen_32	GAACAGTTGCTTGCTATGGACTTATATTTGCCCATTAAATCTCGATTGAATGTAGATGACTACACTAGCTGCCATTGAAT	00
gen_33	TTCACATATTCGTAACTATGACATGGTGGAAATTGACCTACATTAAAAACATATTAACCGTTTGGTTCCAGGCAGGTTTA	00
gen_34	TCATTACATGTAGGTCACAACATTCGGTACTCTTCTGATCTAACTCGAGCACTAGCGGACCGCAGTTTAACGAGGGGGGA	00
gen_35	GTTCACAACCTGCATGTCTTGCATTGATGAGCCAAGATTCGGTTGTGAGAAACGATAGGAGATTCATCAAGAGCCGACGA	00
gen_36	AGTACTCAGCGAAGGGCTGCGAAAGACGAATAATCGTAACTGGTCTCAGTCAGTTGGGTGCTGTGGATAGTGAATATGGA	00
gen_37	ATTGGCAGGTATGCGGGGCTTCATAAACATGATACAGTGAAAGATGTCTCTTCAATGGCGATTCGATGCGTGTCCAAGGA	00
gen_38	AAATTGATTCATACAACATTGGTGGTTCCATTTGTTATTTTGTGTGTTTGTGCTTGAGAAGTTTAAGCTCCCTATCGGTT	00
gen_39	ATGGGCTGCAGGTAAGCCTGGATCAGTGTAATTGATCTCAGCAGTGCGTTGATTGCGAGCAGCAGCACTGTCGGAGATGG	00
gen_40	TGCTTAACGAGGTTCGTGCCACGACTGGTTTCGACTATTGGACCCCGGCGGCATCGAGTGTTATACTCGACGATTCTCAT	00
gen_41	ACGACCAAGCTATCTAATCCCTTGGCTAACATGTCGCGATTATCTGATAGAGAATTTAGATGCTTAGCTAGCTTTAAAGG	00
gen_42	GTTATTTCGTATTGTGGACGTTACACATGTACCGGGCGACCCATTTTGGTTTGTGTCCTGTAACGGCTGATAATGGTCAT	00
gen_43	AGATAACTCGTGTATAGGTTAACGATCTATTTACCTGTCCAGACACACTAAGTACGCCTAGGTGTCTATAGGCTGCGGGC	00
gen_44	TGAACGTGCAACGTTTGTTGAGGGTATTTTGGATTTAAAAGCGGATCTTTACTATGAAGTTATGGATTGGACGATTCATC	00
gen_45	TTGGGGTAAATTTTTGGATGTATGCGTTATGTACCATTTATCAAGGTAACTGAATGGAAAACCGCAAGTGTGGTCCCACA	00
gen_46	ACAACAACTCTCGACATTAGGACAGTGGACATACTAATTAACGTTTCACCTCAAACGCTTCTTTCCTTTTCAAGTCTATT	00
gen_47	CTGTCGCTACAATCCTGTCTCCCGATTATTGGCTTTTATGGGATTAGTCGACGTACATTATAATGGACAGAAAACTGGTA	00
gen_48	GTCCACGAATGGTATGTTCACAGCATCATTGTCTTACGTGGCTCCAGATATTACTCTTGTCCATCAGAGATATTTACTTA	00
gen_49	AATTGTTTAATACTGTTAGGTGGTCCATCCTCTTTTTTCGTATCTGGGTTCCTTAGAACTCTGTTTGTGATGTCTCAATT	00
gen_50	AGAAGTATTCTCGTGCATGATCTGTTCGGGATTATACAAAGTTAGCAAAGGAGGTTGCATGGTCAGACAGTGTCTAGAAT	00
gen_51	TTATTATCTTCGGTTTACATGAGGTTTTGAACAGTGGGCAGTGGTGTGTAGTCTTACGGTAGATCTACCATTAAGGTTAC	00
gen_52	TAACTGGGTAGAAAAAGGCCTATCCATTTATAACTTATCAACCGGATGACTGGCTATTCTAGTTAATGAGGGTGAGTGTC	00
gen_53	TAAACATCTAGGAATTAGGTACAAGAAGTGATTTTTCCTGTTAGATTACAGTAACTAGTGTGGGGATAATCGTCGGAATC	00
gen_54	ATAATATTCATTGACCTTCGGTATCTTAGTTCCATTCTCTTCGGGTTAGAAGGTTTGGCATTGGGTGGACACTTTATTGA	00
gen_55	AGTGTGAGGATTACGTGTACGGATTTGTGTGGTGCAGTTACTGAGGTGGCCAAGAACAATCCAGGTGGCTCCTTCGTTGC	00
gen_56	TTATTACACGTCTTTGGGTCAGGATCTTACTTGGAGTGTGTTGCCAGTTGTAGCGGCAGAGAATGCTCAGCTGTTTAGAT	00
gen_57	GTTGGCTGTTTAAAAGAATATTTCTGGCCAGCACTTAAGTTTGACGACTTGGGTAGAGTAACAACTAGCCCAGCTGGTTG	00
gen_58	CAAAATATTTATCTAATCGCTTGCTTTTGTGTTCGAGTACACAAGATCCGTGGCTATTGCGTCAGAATCGCCCTGATTTG	00
gen_59	CTACATGGTGTAGGCGTACAATTGGGCTTTGCAGTACAGTTGCAGCTTGTGTTGGTCTCTGGTTGAGAGCCAGGCTGCAT	00
gen_60	TCTGATCGAATGGTGCAGATACAATGACGGCGTTCAGGCAATCATGATTGGGGCCAGTAGTATCTTCAGCCGGGGTAAAT	00
gen_61	ATGGCCAAGAGCATCTGCGACACGTTAATGTTATCGAACCATGCGCAAAGACACATTATGAGCTCAAGATGATCGACCTA	00
gen_62	CGTAGACAATAACTTTCCAATTAGTTCCACCACCGGATATTCAATCTGCTGGGGCAAGTTTCAGTCGATAGTGGATAGGG	00
gen_63	TAGATTCGAGGAATTAAGATAAGTGGGAGTCACTGTGGTAAATGGGGCAGCATCTGGTGTGATATTTGATTGTTTGGGGT	00
gen_64	AACCTTCATTAGCTGGTATATTCGAACTGTAGCAATCCAGATTGAGTACGAGCTTTACTAGTCAGAGCTATATATATGGG	00
gen_65	TTTGTGACGGATCCATGATATAAGGAAAGATTGGGATAGGTTAGTGTATGTTCTATTTATATCCTATCTATGTTGTGTTA	00
gen_66	CTATCGTTAGAAGTAGGTTTAATAATTGTTACGTAGCGCTGCAGGAAATGTGAGCTGTCCACCCTCCCTGGTAGTGGTGC	00
gen_67	TCTGTGGAGTTTCTATGATCACAGAACACCTCCATTAACGAACATATACTACTATTCAGTTTTGTAGCGCATAGATAAGA	00
gen_68	AACAAACGCTATGTTCGTCTGTTACAGACCGACGGATCTTATGGCCATGTGCAGTGTACTGCTGGGATATTGTATCAGGA	00
gen_69	GATAGCGATGTGGATTTTGTGAATTGGTCGTCAAACAGAATGTACTCACATGCTGCGTCGCAACGACAAATCCTTTTTGA	00
gen_70	TCCTTTGGATTGATCTTCTAGCTCGAGTAGTAGTGCTAAGTATAGCCGCCGGCTTCAATTGCGGACCTGGGGTTTTCGTA	00
gen_71	CACATGACCGTAGGGGAGTAGGTTAATATTCATGGTCTGGTAGTACTGAGAGACTACAACGGGACCGCCTGGCTGCGGTT	00
gen_72	TTGAGCTTGGCGTAGCGGTTTTACCTTGAGGACGGTTAAAGGCAGGCGTTTACCATGGAAGATTGCATCTGGTTGTTAGG	00
gen_73	ATGCTTGATCCTGATGGGTCGTGACAACGTCTCAGGAATCCAAGTGACTATAATTTGAGCAAAGCGCCCACGTATAACCA	00
gen_74	GTTCTCATAACTTACGAGCTAGACCCAATCTTTTAGCGTTTGGTGTAGAGACGACTTGTTTAGTTTGCTGAGAGTTCTCA	00
gen_75	AATTGCGTTACTTTTGAATTGGGTGATGGGCATCAATAATTGGAATCAAAAATGAATTTAACTTTAGTACCCAGCTTATA	00
gen_76	TCGATGTGACTAACTAAAACTAAGTATGAATGATACGGCAAGTACTAGGCATTAGCCCTTGCTCTCGTGTGTATCCCCTC	00
gen_77	TGTCTCCTTCTGGCTTTATGTCACTCGTGGCATTAGGTTTTGTGAGGTTAGGTTGTACAGTTAGTGGTACCTTTTGTCTT	00
gen_78	CACGGTCGTGACACGCTGATGTATTCGTTGCTCTCTCCTGAGTCTCATCTGTAACAGGGCAATCAGCACTTGGAGATGAC	00
gen_79	ATCAAGTTACTTTGGTGGATCGGGTCTATGGTTGAGGAAAGCTATAAAACCTGCCAGCCCCTGGCATAGGCTGTCGAATA	00
gen_80	AACACTGATAGTGATTGCACGGGGGTGCTGAAGGTTATGGAGAGTTCAATGTGACTACCCGCGAACAGTTCTGGAAGGGA	00
gen_81	CTTTGTGGTACTGAATAGCTTGTGCTTAATGTCTTTAGTGTGTGCTTGCGGTGGACTGAGGTTCGGTCATAACGATATAA	00
gen_82	GAGTATGGGACGTGTAGTCGCTTACATGTTAAGTAATAGGGATATGTTCGCTTTGGGATCAATAAATCTGTGGCTCTACT	00
gen_83	GTGGTTAGGCATTATAATGTCTCGAGTGGTGTCAGTTGTCTCTGAAATTTGTACACATCACGAAGTTATGGCATATGTTA	00
gen_84	ACTGACAAACAACCTTAGATCATTTCGAGAGTTAGAGACACATCCCGACTGGAGGGCGTTTCTATAGCAGTGTGCCTCAT	00
gen_85	GTTAGGTTCTTGTTGATCGTCGGTTTGTATTGCATAAAGTCATTATGTGCAGTATGAGACGTGGCTGAGACGCCATCGAA	00
gen_86	GAAAGTAGGCTCAAAATGAAACTTGTGACATATCAAGATTGGAGGAGCGATGCGGAAAGGAGGCTTAACGATGTGCTGTT	00
gen_87	GATTTGAAGATCTTTTCTTAGTGGTGCTATGCTATGCCTCCAGCAGCTTGTGGGGTTGCTTGCGACGGGCCTGGCTTCGA	00
gen_88	TGAGATCCTTTATGTCAGCGGTCATTGAGTTATGTTCAGCCATCTTTAGCACGGTGCAGGTCGGCACACGTTCTACGTCT	00
gen_89	TGTTTAGATTTTTGGGTTCGTATCTCTTTATCGAGGAAATGTCTGAATTGTATCCCGTCCTTTTGAGCTGAATTAGCGAA	00
gen_90	GTAAGTGTTCTTTACTTCAGATTACCGCAGGGTTCCGGGAATTATATTTGTATTGTCCAGGTGGGAATCTCATTTGGATA	00
gen_91	GACGTGAGAGTGGTCTAGGATGATATGTTGACCCACCATGTCCCGCGAGAATCCTTTTCTTGGATCAGGTACGCAACCGA	00
gen_92	TATGAATGCCAACGGGCACGAACGTTGGTATTTAGCGAGTATTTATTATTCTTCATACCAGTGGTTGGCGAAGTATTTGC	00
gen_93	AATTCAGAGGGCTCGCTACGTGCAAGCCTCAGTGTACAATTGAGTGCACTGGTGAAATGTTAGTCATAGTAAAGGGAGCA	00
gen_94	TCTACAGGCTCCAATATGTCGCTATTTCCATCAGAGACCACGTCGTCGGGAGGTAATTGTAGACACGTTAGGATCCGTCA	00
gen_95	TCATCTCACTACGTTAGGTGGAGCACAATGAGTTAAGGTTGTAGCTGGACTTACCTGTTGAACGTGTGTGATGGTAAACG	00
gen_96	TCTAATGGTTTGAAGCGGACCTCTTCATGTGCTAGCAGTCTAGATAGGCTAGAGGACCGGGATACTTATTGGTAGCCAGG	00
gen_97	TAATGTTTTGTTTAGTAGTCTAATACCCAATATCACTGCGTGATCCAGTGTTTCACACGAGGTTAAGGTACCAGTCTGCT	00
gen_98	CGCCAGTTTACAATATTCCCTCCACTGCTAGTGCCAATTACATGCTTGGTAGTTTGCAAACAATATAGTGGTTACCGCGA	00
gen_99	GAGAAGGATGCAATTTGTGATATGTTATATTTAGAGCGGTCATGACATGGACGGTACGTGGGTCGGAAGTTCATCGAGTA	00
gen_100	CTATCTGGTAGCATTTCTCGACTGTTGATTACAGTGCTTAATGGGATTTGTTACTGAGGATACACTTGACACTTTCCTTA	00
gen_101	TGCAATCCATCAAGAGTGTAATGCATTGTTTTGTATGTTAGTTACGTTTCAGTGACTCATAAAGTCTGTAGACCGTTGCA	00
gen_102	CAGTCAATTTATGTTAGAACTTGCCCTTGTTTAATTTGCATTTTGTGGAATTGTACCTGGGTTACTAAAGGAGGAGTCCT	00
gen_103	GGCTGTTCTGGATCAACAACAAAAAAGTCTCCTGTGGTTTGAATCCTAGACGTTAGAAGCAATAAAGCACTCCTTATGAA	00
gen_104	TCGCCTATCCTAGCTAGTGAAGCCATGGCGGAGTCCAGTCAAACAGGTGTCGATCTAACTAGGCTACGTGTTGGCTTAAG	00
gen_105	GTGTTCCCGAGTAGAAGTCTGCTGTACTGTTGTGCAGGACTTTTGTTGGGCAGAATCTGGTGTAATGCAGGCTGTCATTT	00
gen_106	AGATAGTTTCGAAAGGAAAATGATGTGACTAGGTAAAGCTATAGTATGGTAGTTGTAATGCTTTGCAACTAGAGCGTTAA	00
gen_107	TGTCTACGATTGCTTATAGAGTGTATGTATACGCAGACGCAGATCTTGGATCCGTGCCCTTGCGGTCTAACTAACTCGTT	00
gen_108	TAAGTTTGTATTTGGTTGTTAGCGTAATCGTGTTATCCTGTTTTGATAACTTTGATACGATGACGCTAATATTAGCGGTT	00
gen_109	TGATCGACTCTTCTTTCTATATTGTCACGTTCTAAGTCCTATTAGAGCGTGTATGCATAAGAAATCCTGGTAAGGCGCTA	00
gen_110	TTTTGCGTTTTTGTGTAGATTTTATTGTTCATTAATATGGCCTAGTATAGTAGACGAGATAACTGGGGTATTACTAATGA	00
gen_111	TGGCTATAAGCCCTGTTGTCAGATTCCATTCGTAGATAAATCTGTGATGAGAGACGGTTAGTCGCCAAGCCTCTCTTGTC	00
gen_112	TTGTAAGGTACTTGGTAGGGGTCTCAAAATTTCTAAATCACGTCCTATCGCAAGTTCGTGTGTAATCGGGTGGACATGGT	00
gen_113	AGTACTTGGGACTGCTAAGGTCGTTGTTGCCGAATTGTATTCTGTGCATAGTGATGGTGGTCGATAATCGAAATGGGTAC	00
gen_114	ACTCTATGTGGCACTCTGACTATTAGTATGCATGGTTCAGGTAGTGGCTGAGTAAGCCCTCTTTGCCTTTTATGGGGTCT	00
gen_115	CGTTGCGTAAATGCTGTTATGACTTCCAATGTGGTATAGGTCAAGTTTATCGGCTCCAGTTTTGTTTGCGTTGATGAGTC	00
gen_116	TTGACCTTACAGTTTATTTGACTATACGGTAGTGGTGCCAGTTGCAACGCTCTCCAAATCAGTGATCGCTGGTTATGGGG	00
gen_117	GTCAATTGGTTATAAAAGGACGGTTCATAAGCTGGGTTAGGCCGCAAGTTACGGTTAGGACTCGATGTAGCTACGATGAT	00
gen_118	TCCTACTATTACTTGGCGTTATATGCTGATTTTATAAAAATCTCAGGTAGTGCCTACGAGTAAGATTATAACCTCAACTA	00
gen_119	CTATCAGAAGTGTCAGCTCTCTTGTTATGGGTATTTGATTATGACTATTTCGCTGTTCTGGTCCGCATTCTGTATCCTGT	00
gen_120	AGGGTCAAGTTAGTATAATTCTTATATGATGATGCTTAAAGTTTGGCAGGACATGTATGCGTCACTATGGCACGCGGGAT	00
gen_121	TTTGTTGCTTCGTCGGTTATGTGGTCGGCTGGGGGATCGTTAAGTTAGCTTAAGGTTATACTTTAGGCCCGCTTCTAGGC	00
gen_122	CCTTTGATATGCTGTTAGACATAGGCTGTAAGGAAATTAAGTTAAAGACCCACGGATCAACCATCGATTTCCAGGTATTA	00
gen_123	TCCATGCCATGGGGTAGAGGCATGTCCAGTGGTCAGATTTGTAGGCCAGGCAACAGTTTCGGTCAACATGGTTGGGGGGT	00
gen_124	AGGGTGAGTAGGAAAGAGTTTTTAAGAGATGAGTTCGTGGACTAAGGTATTAGGACTCGTAAGACCACAACGCTCCCTGA	00
gen_125	GTCTAGAGTGGCTCCTTTTCCAGTGAAACTGGATCCTATTATCGTCGTCCCTGGTTGTTTAACGGACTAAAGGGGCGTAT	00
gen_126	TGTTAGTCTAATATATTCAAGCGTCTCTGGCGGGTGGTGTCGAACATCATAACTTAAGACAATGTTCCATACTGAGTCAC	00
gen_127	ATGTTGAGATCAGGCATATGAGAGAAGGCAAGGCAAGTAACGAGTAGAAATTCTAAGAGCTAACATGCACAATCCGGTCA	00
gen_128	TGGGCTAACCACGTCAACACTTTGCAGGTTTGCCATCGCATTACGCTCTAGCAAAGGTTTGGAGAACGTAGGGTGAGGGA	00
gen_129	AATTCCCAAAGGTTGTAGCCTATTCAAAAAGCACTTAGAGCCCTACTGTTTTGACAGCGTGGTCACTGAAGATCTGTACT	00
gen_130	TCGATGTAGAGGGAGACTGTGCTGGTAATGGCAATAAGAGAATGTTTGTCTCTATATATGTTGATATGCGTATGGGAGGA	00
gen_131	AGCTAAGGAAGAACGGGGTGGGGACCAGGTCCTGCACACTGTTTAATGGTTAGACAGGACGTGCACGGGAACGGCATGCA	00
gen_132	AGCACAATCATAACTATTTAATGCGTCAATGTGTCGGACGTCTCAAACTAAAGCAGCACGTCTTCTGACGGCTGGACCGT	00
gen_133	CTTTACCAGGATGGAAAGTGGATCAGCCGATGATAGACGAGGTCTAGGGGGGCCACGGTTGCATGGAGTTACTAACGAAC	00
gen_134	TCAGGGACCGTATGGCGTTGTCCTTAACTGTTTACGACATATAACACTTTATTAATCGGCATATCAATCGAGGCTGTGAC	00
gen_135	TCTTGGATCCAAAGGCAGTAGTAATTAGGGATCGTTGATAAATTTGTACCGGGGAGCTCGTGCAGCTACTCAAGACTATT	00
gen_136	TAATTTCACCTGTCTTGCTTTCTAGACTGACTCAGCATCCCTAAGTGATCTTAGTGGTTATTCTTCATTGCGAAATTTAT	00
gen_137	AATGTGGGGCTGTGCGTGATCTTTTAGGCTGCAATAGGAAAGTCGAGGGTGTTGGTAGGTGTCCAGAGGTCGGCTGTTTA	00
gen_138	TGGTGCTTGCGATCACACATCCTTTGCCCCATCCTGTAATGACGGTGAAACAACATATCTCGTGGCTTAGCTTCTGATTG	00
gen_139	TTATGTGCACCAGCAATTATTGACATAGCGACTCGGTATATCAGGATGTTGCCTTGTAACATTATAGAGGGACATTTGGG	00
gen_140	GGTAAGTTTGAACTCTTTGGCAATTTTTGTATATCCACTAACTAATGTTGAATTTCACTAGATTGATACCAAGCCTAAGA	00
gen_141	CACATCAAATTATATTAAGGAGAATCTTAGCATGTATCGGTTAACAGCTTCGTCCATTTCTAGTGTGCATGAGCTTAAAG	00
gen_142	TCTCCCAATGGTTATTTACTATGGTTCTGGTCGGGTAGAATAGTCCTGTTCTTGCAGTTCCACACATTTTTATCCAGGAT	00
gen_143	AACTTGCGACGTTATTACCTATGCCCGTCTCAATTTGTATGGTTAGCTTCTTACACCGATTAATTGTGAATGGGTTGCGA	00
gen_144	TCTGTAACTTACGGGGATTGAGGTTAATTGATCGGACCAGTCAAATTATGTATACGCTCCAATATGTATATTGTCTCCTA	00
gen_145	CCAGTACAAGGTAAAGAGCTGCTCCTCCTGCCCTGGCCGCATCTATTTAACATATTGTAATGATTTGTTGTCCTTCCAGT	00
gen_146	TGGTGGTAACTCTCCTAATTTTAGGCTGAGGCTTGTTAGAGAGAGATGGTAAGTAGCTTGTCGGGTTTCCAACTGTGTAC	00
gen_147	AATCATGGCCTTTGGCTACAGTTGATATCCCATTAAGGGATCGTGTCGAGTCCACCGCCTTGGCAACATCTGACTGTAAG	00
gen_148	GAGGATAGAGGTTTCTCTCATACCGTACAGTTGTCGACGGTACATACTTGTAGTGTTTTCTCAATTCATGCCAGCGGTGT	00
gen_149	CTGACCTTTTTTTTGGATCACCTCTTTAACGAACCATTTATCAGGTGGGCAACGTTGGGAACTTCTAATATACTCATTCT	00
gen_150	CATCGCAAACTGCACGTCTGTATTTCTTGTAGCATACCTTATCAGAGAAATACGAGGAATGCCTCATAAACAAAGTGTGA	00
gen_151	TTTGGGTTTAGTGGGTATGGTACCAGGACGAGGGCAGGACTAGTGTTGGTAAGCACCGCATGTGCGGATAGTGACAACAA	00
gen_152	TTTAACAGCAATGTTGCTTTGCCTTCAACTGACTTCTGATTAATAGTCTGAGATATGAGTGGGTGGGTACATGTGAGGGA	00
gen_153	TCGATCTAACTGCTTAAATGGTGGACAGGTCATAAAAGGCTAGCGGTTACAGGTCGTCTTGTTCCGTGTGCTAACGTGTA	00
gen_154	TTTGTCCAGTAATCCCTGGTTAAGTTATCAAGTTTACACTATCAGCGGTCTTGTAGCAAGATTTCGAGCACAGGCCGGCA	00
gen_155	TGCATGCTATGGGAGAAGAGCACAAGGGTTGCACGTCAGTAGGCCCGGCTAGGGGTGTTGCTCATAGATGCGGGACCAAC	00
gen_156	CTTCGAAAGGTCCAGAACTTAAGTCGCTCAATCATGAGCACAAGCTTGTCGTAATATCTGAGGAAAGATAAGTTTTGAGT	00
gen_157	TTCGTTGAAGCATTTTTATCTTGTTAAGTGGACAATTCGTGGGACCTGGTTCAGTGGATGTGCGGGGACGTGGATGCCTA	00
gen_158	AGATTGGATCGCTTAGGGGCCATTGCAGTATGACGGATGGGAGCTAGTGGTTGGTTCCGTGTCAGCAGCTTCTCTTGGTA	00
gen_159	ATCTCTGTATAGTTGATGTCTGCTTTGTTTTATGTTATTTCCTCTGACTTTGAACAGGCCTGGGCTGACAAGGGATACGA	00
gen_160	TTGAGTGATAAAGACGTTCAGGTGGAGACACAATGACAGAATGCTCAGGCCATCGGGGTGTCTGAGGGGTTAGCACCTGC	00
gen_161	AGTTAGGTTTTATCTACCTCGTTGTTACTTGTGTCTAAGATGCTATCCTGACCTCGGCACAACGGGCTACAGGATCGTTT	00
gen_162	AAGATTCATATTCTTATTATGGTTATTATTTCAGTAAATGTTAGCATTAGCTAGTTAGACGGGTTTTCGTTTTGATAAGA	00
gen_163	GGTATGGTAGAAACTCAACTCAAGACAAGGTCTAAGCCATATTTAATAAGCGGAAGGGGGGCCTAAATCTAATGTTGCGT	00
gen_164	TTTCAATCTTTTATGTACGTCAAGATTTAAATGGTTACAACGACTGGTGTGAAAGCAATTTTCATCATTGGTTAGGCTGA	00
gen_165	TCTCATAGCGTGTACTCGTGGAGGCCCAGGGCTCTCGACAAGTCGATCTACGTCATGTCCGTCGACATCAGGTCATACTG	00
gen_166	GAGTTATGTCTGCAGATAATCGGAGGGTGCGACTAGGGAGGAGGACCCCTCAGTATCGGGTGGGTGGTTTGTTGGCTTTT	00
gen_167	GTAATGGTTAGGAGCTAGGATCAGGACTGAACTGGGTGGGAAGGTACTGGGGGTTTTGACGTAATTGGTGCGGCTTGTAT	00
gen_168	AGTTTCCAAAAAGTGAAGGCCTTCCCACCAGTGGGCTAAACCATACGACACTTGTATATTATTACATTGATAATCTGACA	00
gen_169	AGTGCCTGGTTAAAACTTTCGGTGGTATGTCGTTAGTGAGGTGGTTGACCGAAGACGGGTTGACCTGTTATAAGTAGGAT	00
gen_170	ACCAACTTTCTAGGTTTTGATCTTGTTTAGGAGTATACCGCAAGGTTCTGATAATACGCATTCAGGATCAAGAGGAAGGA	00
gen_171	ACCAATTCGAACTTGATGAGCGCAGGCGTAGGGAAACTATCCATATTTCCCCTCAATTCCTTACGTGAGTAATGGCCTTC	00
gen_172	GAATGCCTGCGTACTTAGGCAAGTATCTATATGCTATAGTTGGTTCAACGCGAGGTGCTGCGTTCAACTATACGTTCTTA	00
gen_173	AGGTCGGGTTGTAAAGGTTCGTTTTGGTTAAGAACTTCTCCTAGGGCTATCAGTGTCCACAGTGAGACCCTGTTATCTCA	00
gen_174	TGAGTACGTGCGTGGGCAGGGGGTCTATTGGAAAGATTACGATTATTGGTAGGTCCTGCCGTAGGGCAGGGATGTAAGTA	00
gen_175	TAGGTATTTGTGTTACACCATTAGCTGTGGTCAAGACTTGGATCGGTGCAGTATTTGTACTATTATGAGCATAAATTGTG	00
gen_176	CCTTTGATATATGCTTCTAGATAAAGTCTTCAGGCTGGTGGGTTCTTTTTACGAATTTTGAATTAACATGGCTGGGAAGA	00
gen_177	TTTATAAGAGGCAGACTGGACCGCACTGGGTGACTGCATAAGATGCTAGGAATAATTTTTTGTTAAAGATGTGTACGTTG	00
gen_178	TAGTGGGGACAATGGTTCGTTAGAGGTGGCCATAATTCGAGTCTAATGTTCCTAGTCAGTTTGGTCCCACTCCACTGGTT	00
gen_179	ATAGTGTCGGGGAAATGTGGGTATAATGACTAGTACAACTGAAGCCTCGCTGTGACATTTATTAGTGCTAGGCCTGGTAA	00
gen_180	GGATTGATAGGGTGTTTAGTAGGGGAAAAGGTCACGGTCGTCTTGTGCTCTTAACATAGCATCTCTAGGCTATTACCAAA	00
gen_181	AACATGTATAGTAGTCACGATGTTGACTTTAAAGGTTTTTGAGTGTTATGATGTTCAAGTTGATTTGGTCAATCGGGGCT	00
gen_182	TCATCCGGTGGGAAGAGTAGCGACAAATTGGTGCTTATAGTTGCTCAGCTGAGTATGATGACATTGGTTGTCTGGCAGTA	00
gen_183	ACTGTACTTTAGTAGAATGTTCATCTACTTGACTCTATCAATGTTAGCGAAGCAAGTCCCTGTAGGTTGTTTTACAAGGA	00
gen_184	ATGCTTTGATGATTTCGTTGACGGCTAGTGTGGGCGTGGTAGTCTGTTGTACGTGTTTTACTAGAGCTTACGTGTCTTGA	00
gen_185	CGAAATGATTCGTACCCTACTAAGGGATATGTTCAAGGTCCCGTTACTTTTATTTAAGGATACTTTAGATGGATGAACTA	00
gen_186	AGAACGTGTTCGTTGTCCATCCCTTGGTCTGCGGTTGGTTGGGGATGTGTGATGTGCGTTGTATATCGTCGATGGCTTGA	00
gen_187	GGTGTGGTCCATGTTTGTATTTGATCCTGACTCTAAGATTCAAAAGTTCTCCGGTGAAGGTGAGGTTATTTCGGTGCTTA	00
gen_188	CTGCCCATCCAAGTTATACTTCTATTTGATTATTGATCTGCTTATATTAGCTTTGCCAGGATGTATATACTTGCTTCTAG	00
gen_189	GATATGGTTAGGAAACGGGTTCGTTTATATTTCTTCCCTATGTGGTAATCATGAAGGCCTTCACGAACGTGTGCAAGTCT	00
gen_190	GTAAACATATGTCGTTCTTGCTCTTCCTCTGTTGACGAAGTCATGGGATGTGCTACCAATAGACCCTTGTCCGGGGCTCA	00
gen_191	TGATCCATTGTTTACTCGTAGAATCGGGTACATGACCACATTTAATCTCCTTATTGTCATAAGTGGGGTTAGTATATGCA	00
gen_192	CTTTGACTACTTTCTCTGTCCTATAAGCGAAACTAGGTAGGGACTGCTAATGACTCGAAATGTTAGAGGCTATCTTCGAA	00
gen_193	AGATTCGAATTAGTGATCATGGGTTCATAGGATGGCACTATTTTGTGGTCCGCGTGTCAGCGACCTGACTGATGAAGTGT	00
gen_194	AATTAGGAAATGTTACGAACATCTCTTGCTTGCCGAATCCACTGGCGTTTCGGTGCATATTATTCGATAGTTAAGTTGTA	00
gen_195	TCCCTCATCATGTATGGTTGAGTTGCGTTTTCACACTAGTTGATTGACCCATTATGAGGATTTCGTCGCTTTCTACTTGA	00
gen_196	GTCCTGTACAACATCTCTCTTGGGGTAATAGAATGGATTTGCTGTGTGAACTAAGTTTGTTGGGGGTGGCACGATGCAAG	00
gen_197	TGTCTCAGTTTGTAGTCTGTTACGTGTCGTTGCTATCAGTCAATGGTACGTAAAGGGTTTTTGTTAGTCACATACTGTCA	00
gen_198	TATTCACCCTACGTGAGTTGGAACTCTTTAGCGAATAAAAAAGGTTAATCTTTGGAGTGTGTGACTTTCAGCTTCCTGAT	00
gen_199	CACCGCAAAGACCGGTCTTTCAGATCCAAAGCCTAATTTATGGGTACGTAGCGGTAGACTAATGCTCAACGAAGGGAGGT	00
gen_200	ATGGCCAGGATTCGTCACACCTTAATTATGATTTCGTTTGGCTCTTCTCATCTATTTGCTTTGTTGCATGACTATGTTTT	00
gen_201	TATGGTATCTGGACTGCTAGCCGATAAAAAGACCTTGATAGCCGATGCACCATGTGAATCATCTTAGCGGCTACACGTGA	00
gen_202	TCTTCTTGCGGTATAGGATTCAAGTGATTTCATCCAAAATTGCGGATATGTAGTTGATGTTTGATCTGATCTTGGCTCTA	00
gen_203	ATTCGTCTTGTGGGTCAAATGGGTTGTACTAACATTTGTGATGGCTTCTGAACACTTTGGCTTGAGGCGATGTGGGTTAA	00
gen_204	GACATCGCCAACAATGTTCAGTTAGTTATAGCTGTTCCGATGAGGGGGATCCTTTTGGTAGCCACAGTGTGAGTGGTGAT	00
gen_205	TATATGTTCGTTGGCTATCTATCAGCGGCAGTGATTAGGTGTGAGAGCATTGGATCGTGATCTACCTTTGGCAGTGGCTT	00
gen_206	GAGGCATCGCTGGTAGGGAGGCCCCCCCTGTAACTCGAGACACTCTCTGTAAGCGTTACACAGGTCGCTGCAGGCGACTA	00
gen_207	CACGGCAGCTATCTCGTCTAGGTTAAAGAAGTCTAGGCGACAGTGTAGAGTTCAATGAGATCCAGTCCCAAGCGCTGCTT	00
gen_208	GTAAGTAGATTAAGAGAGGGACATATCCACGTTCAATTAGTTCAACTGTAAGCTGTCACAATCGGTCTCAAAGCATAGCG	00
gen_209	CATTCCACATGTAATTCATAGCTTATAGTTTTAGGGACGGAATGATTTAGTCGTGCAAACATTGAGGAAACTGTATCCAC	00
gen_210	TATTACTGGTAGCATCAATCCGAAACGTATCTCGTCGTCTCCCACCCGTTTTAGGTGTATTCATCAACAGATTAGAGGAA	00
gen_211	CATCTAAAACTCGTCCCTCCTTCTTACAGTTTAATGAGCTTGTTTTGTTACTACAATCCGCTAAATTTAGATTAACTTCT	00
gen_212	AAATCAGAAACTATGTCCAGTCAGGTTTGTATGAGGTCATGGGTACTGGCAGGCATGAGACATCATGTGGTTGAATTTCA	00
gen_213	TTCTCGTAGGACCCAGTATAGGTTCTATTACGTGAGCGTTAGAGTGGTCTACTCAGGTCCGGTGCATGGTGTCTTAGATG	00
gen_214	AGCTCTGTCTCCAATTTATGGTATACTATTTTAAACGTTAGTCCACAATGATAAGGGTCCATTCGCCTAGTGGATTCTCT	00
gen_215	AGTGTAAGCGGGATGAGCTGGAACGTCGTCGTTGTTTGAAGTGTCAATTGCGTCGAGAAGTTGCGAATCTACTAGCGGCT	00
gen_216	AAGTGCTTCCTGCTGTCTACATGATGATAGCGACCCTATAGACGTTTACTTGCGTTAGAGTGGGAGCGGGCATTAGGTTC	00
gen_217	TTATGCATGGTTTTAATGTTGCTTCACTTCCCAGATGCTTTTTAAGCGTGATCAGATACTAGTTAGACAGTTATGCGACA	00
gen_218	TGTTACGTAAGTGAGTTGATATCATCCCCGTTAGCGAGACGTGCTAGCAGTGTGCAATTTGGGTTTTAGTGCTGCTTCGA	00
gen_219	TCGACCTTTATTTGTTTTACATGGGTAATATTAGTCGTGTTGTCTAGATCTAGATTTTCAGACCCAATAGTTGTGGTTAC	00
gen_220	GTTTAGGTTGAGACGTCGTTGGTTTGTGACTTGTTAAATTTAGCTGTAGGTGGATACTTGGAGGAGTTGATGATTTTGGA	00
gen_221	GTTCTCAACTCGTTTGAAAACTCTAGGGTAAATGATTAGATGTTTGTTATGATCCTCTAATATTTTCTTCAGGGGGGGGA	00
gen_222	TGTGACTAACATGAGCTGTTTCTTGAGATCACACTGGTCTTCATGGGTCGTCACGTTGTACAGCTAGCGTTTATGCACTT	00
gen_223	CAAGTCCGTGAGCTCTTCGATACGATTCCCTTTTATTAGTATTGCTGGTCGGCATCCCTTACCTGCATATTATTTCTAAT	00
gen_224	GGTGCGTGCATGTTGTAGTAAGGTGTAGGTGTCACATGTGTGTTGTTGAAGTTACGGATAACCACAAGTCTGCTAGATGA	00
gen_225	TCCTGTTGTCTCATCCAGTTGTCTAAGAGTTGGAGGTGGGTTGGGTATGTTTTTTATTCAATTGTCATCTGCAGCTTGAG	00
gen_226	CAAAGGACTAAGACAGTTATAATAGTTTTGATACAAGGACACGCTGGCGGCGGATATTGTACTACAGGCTGTTGTGCATT	00
gen_227	GGCAGGGCATTGTTATCAGGCTGCCATTATTTGGGGTACTCAATCCTCGGTGCCACGTCCATGAACAGTAGCGTGACGAT	00
gen_228	TTAGGTTTGGTTTAGACTCATCAATAAGGATTGCTCAATTGGATCGATGTTTGGTCGTCTAAAGATAATAGAGACTACTT	00
gen_229	TTCATCCTTTTGAAGGTTTTGAGTCTTTATCCTCTGCGGCTCTAATGTATTCATGGGCTCTGATTAGTCGGGGCCCTATG	00
gen_230	GATTGTGGAGCCAGAACCCACAAGGTTTTGGCTTTTTGTTGCTGTATGTATAGAGTCTTGTCTTCAGGTGGTGTGGTTTA	00
gen_231	GAACGGTTTAAGCTACAAGTGCTTATTCTCGTGGAGTTCCAGTCTGTGCGAAACTGAAATGGGTCGAGCAAAAGCTCTGA	00
gen_232	AGCTATTCCTTATGAGGCTGTTGGTGTTATGTAGGCATCTAATACGGTGCATCGGCAATGGAAATGATTACTCATTCTGA	00
gen_233	TCTTGTGCGTCAATTGAGATTTTTATTAAACAGTGGCAACGAGGTCGGCAAGGCTGACTGTTCATGGTATCTGAATGAGG	00
gen_234	CAAAGGTTTATGACGTGTATGGAACCTTTTCGGTGCGAATGCATATTCTCAAATAGTGATATAGTTGCGATGATCGGTGT	00
gen_235	TACGATGGTATTGGCTAGTATGTGGGGTGCTTAGGCCTCGTTCGGGTGGCTCTCATGCATTAGCAAAAGAACTGTATGGA	00
gen_236	TAAGTGTACTGCAGCACTTCCAGCTATAAGTCATTTATCGGAGAGATTGATCGTTTGAACCAATCCGATTATGTGGTGGC	00
gen_237	GAGATACGATCGGGGCAGATGCTTTACACCGTGATTATATTTGAGTTTGACAGTTTCAGCATGGTGTGCTTCAATCTAGT	00
gen_238	TTCGGTTCAGAGATCTAAGCTAGCACTTAACGGGAAACGGTCGGAGACAAGGACTAGTAAATGTATTGTGAGGTGAAGTA	00
gen_239	ACAACTGCGGGAAACCGTTTTACTATTAATGAGTTAGAGATTGATTGTACGGGCCAATAGTTAATTATTAGAGCAGAACA	00
gen_240	CACCTGATGCACACGTCACGTATCTTGGCTTTCTCTTATTTCACTTCAGTGAAAGTATAACGTCTTTGTATCGGGAACAA	00
gen_241	CTTTGATTACTACAAGACCATGAGACCCTTTTATATAATTATGTTTCTAGTGAAAGTTCTTTTGTATGCTTGAGTTGACA	00
gen_242	CTAACATGTTCCAATTGCTGGATACTTTGATTAATACGTGCGGCTAATATGTTCCACCTAATTCGAAAGAATCGTGCAGA	00
gen_243	ATTAGATCGTTAAGCGGTGGATTCGCAGCCAAACGAATATAAAATATAGAGCTGGCCATGCTTCGGTTCAAAGGGTTCGA	00
gen_244	TGTGCACTGTTTGGTCAGCCTCCTATGCTCAGAAATTGCGTTTTACATGATTGTACCTGCTAGATCCATCTCATCTGCTC	00
gen_245	AATAGTAAGAGTTCGTCATCCTTGCACGAGCAGAAATACAATTGGTTATGGATTGTGAGCAACGGAGCCTGCCTAGTCTA	00
gen_246	CAATATGATCCAAAAACAAGGTACCACCCAGCTACGTTAGATATAGTAAAACTATACTATCAACATGGCCGCAGGTTCCA	00
gen_247	TCCCGATATATGGGTCTGTTCTGCTTGGTCTTTAACATGTTGATCCTTTACTGAAAGGTAGTAGGTAGTCGTTCGTGGGC	00
gen_248	TTGTACTATATGCGTGCTCATTCTCGTTGGGTGAACCTATTAGTGAACGAAGTGATTGATGTCTTGGGTGGCCCCTAGTA	00
gen_249	AGGCTTGACGGTTAAGGGTCTCTTCGTAGGAGTGCCCCAGACTTCTGGACAGGGTGGCTTGAGAGGAGTCTCGAAGTGAA	00
gen_250	TATTGTCACATGATTATTAAAAGTCGGGCTGGTTCGTTTATTATTGAAGGGTAGCGCTAGACAGTTTTTGGTCCTGATGA	00
gen_251	CTTTAATTCATGATTTACTTTGTGCAGTGCTCTCATTAAGGCGTTTAGTATCGTCAATAAATGGCAACCTGATTGTGGTG	00
gen_252	GTTATGCTATTGTGTTATAGAAATTCCAAGACCCAGCATTTATAGTTCTTAGACACATTTCACAAGCTACGGATGGGCTA	00
gen_253	TTTAGTGGGGGCCTATCGTTATATTTCTTTAATGCAACCCGTAGTACACAGTAAAGTAATTTATTGGTATCGGTTGGCGA	00
gen_254	TCTTACTTCCGGGAAGAAAGTTTGAGAGCTCTCGATCTATTAGTGTCTAACGATGCTGGGATTTGCTGCTCGAGGGTGTA	00
gen_255	TCGATGTGGAGGGTAGAAAGGTAGACGAGTCTAGTCAGGGTCGGACTGGTCGGCGTTTATTACTGGGGGCTGTCCATCAT	00
gen_256	TTAGATTATGGCTAATGACACCAGGTTCGTGTTCGGTAACTGAATGAATACTGAAACCGTGCAACTTTGTATGGGGAGTA	00
gen_257	GTGGTTCCATACGGGGAATAGAAGGGAGATCATTTGAAATTTTGTGGATGTAGGCTGTTATTTGGTGTCATCGTCACACT	00
gen_258	ACCGGACCCATTAATCAATCTTCATGGTTATGGTCTTAAAGTTCAAGAAGCTATCAATGGTATCTTGGCAATTAGAGGGA	00
gen_259	TGCCAAATATGGTTATGTGCTGCTTATAAGACACTGTGGATCTGGGAATTTAACAATCGATCTTGATTAGAGAGGGGTGG	00
gen_260	TTGCTGTATATCAGGGAGCTCAGATCTTATCCCGAGGTAGTTTGCTAGACTCGCAAAGAGATGAGTGTGGGGTGTTACGA	00
gen_261	GTTCTATTCTCATCCTATTGGTGTCTGGTTCATGTCTTAGTGGGAGTTAGTTACCGACGGGGTTGGAGCTCATGGGGGTT	00
gen_262	AAGAATTATGATGTAAATTGTTATCGAGTGGTTGTATGTAACCATATGTTGAGCGGATATTTGCGCCCTTTCTGCCTTGC	00
gen_263	TATTTCGTAGAGGTGCATCTAGGAGGCATTTACTCAGCTCGGTTGCATGTTTAACTTGCTATACTCCTATCAACTATAAT	00
gen_264	TGCCAGTGAATATGTGCACTTGCAAATCTCTGAGTTACTAAGTTTATGTCTGATCAGTGTGGATAAAATATGGCGTCATT	00
gen_265	GTCTTACGCAACTATCGTAGGTGCATCTGAATCCTCCTGTGCATACAAATGTCTTAAACCTGTTCACTCCCGGTTTACGA	00
gen_266	TGTGAGCTTAGTTCAGCTGTGTTAAAGAGTTGGGTGTTGCAACCAACGTTAGATTTGGTATTCGAGTATATAAGCGTTGA	00
gen_267	TAACGCTCGAGTTCCATTGTGTTTCCCTGGAGGCAGTTTAGATTCGCATGGCTGCAGGGCCACTTGGTTAGATCCATCGT	00
gen_268	CGTAATGAGTCGTTAGATTCTTTCCCTTGTACTAAGAAGGCTGCGGACGTTGGGCTTGCAAAATGCTTCGTCTGGTATTA	00
gen_269	AATGTGTCAGTTAACTCAGAGACGTCAACGGAACTTTCTATAAATCGCTGGATGAGAACATCTAAACTACTTTCGTGCTC	00
gen_270	GTGATTTAGCTTATTTCGAAGCCTAATGGTTGTATGGTCATACCTCTCTATTTCTTCGTTTATTTTGGGCCAAGGCCTTT	00
gen_271	GTCATATGTGGCGGCTATATTTATCTTGTGTTCGTTATACAGAATGAAGTAATCTGTTGCGAGGGGGCAGCGCATGGAAT	00
gen_272	GTTGTGCAGCTATGGCTGACACCCGGTGAAAGCCACAGGAAATTGGGCATAGGATTCGTTTCTAAGTGTGACCGGTCTAA	00
gen_273	ATCTACTATTCATGGTGACTAGACATATCTTGAATTTATGCGATTTTAGCAGGCCTATTACGATTTCGTGCGTCAAATGA	00
gen_274	GTTTGAATTTTGGGCTGACAGCTGTACAGCTGGAAACTAGCCTATAGTTCAAAAATGACCAATGTGGGCTGTCCAGTGAA	00
gen_275	TCTTGGGCTACAGAATAGGCCTTGCGATTTATTGCAGTGAGAGGAGGCAGTCCGAGCTAGTCTCCCCTTACGAGGCTCAA	00
gen_276	GTGGGGTGATTACACTGATTGCTGCTTATAAATTGAGACTGGACAGGCAGTTCTGACTGGATTCGATGTGATAGGTTTGA	00
gen_277	TTACCTAAGACTTAAAAATATTGCGTTGATTTCAGAGTAATGTGAGTCTTAGGTTGCAGGACGATTCTTATCCCAATGTA	00
gen_278	TACGTTTGAAAAGGTTTGAGGCTTATATGTTTGAAGATTGTGTAGTAAACTTCGTGCTTTCTTGGCTGGCCTCTGTGAAC	00
gen_279	ACGTTGTTCTAAGTCTCACGCAGAGCTATGGTGCTGGTATGAATTATGGAGGGCTAGCAGCTCACACGGTCGAGGAGTGC	00
gen_280	TAGGGTAGGATCAAGATATTACTTATGGCGCCACGAATGGTTATTTTAAAACGGATCGCCTTTCGAACATTCGAGTGATG	00
gen_281	TCTATATCCTTTGTCTGTCTTTCCATCCGGGAATATGTTCCTTCCTGGGTATGTTATTGCTCTATGTCTCTACAGCTTTC	00
gen_282	ATGAAATGGTGGGGTTCTAAGCGTCTCGTTTAGATATGAATGTTGAATTTGCACTTTATACTTTGAATTCCTCAATATCT	00
gen_283	ATCGTCATCTCTTTGCAGTGATCAAGTACGATATTCTCAAGGTCTACCGCGGCAGGGCAAACATACGTATTTAATTCGGT	00
gen_284	CCTCACGGTGTAGATGGAGTTTTGGTTACAAACTACCTATATTGAGGACTTCACGACCTTGCAGAGCTGCACCATATTTA	00
gen_285	GAACTCCTAAACATCCCATCTTGCAGTGAATGTCAGATATTTCGTGTTGATCGCAGAACTGCTGCACGTCATGTCTAGGA	00
gen_286	GTATACTAAGGCAGTACGAGGGGTAATGGCGATTGTTCGATTAGGTTGGTTCATCTGATGAGTCGGGACTCGGCTGCGAT	00
gen_287	GAAGGTTGACGAATCCGACATAACCTTGTTGGCTATGTTCCATCAAGTACAAGTGTGGATATACAAGAAAGGATGAGATT	00
gen_288	ATAGTTTCGTAACGACCCGAGGAAGAGCTACTGTTGCAGTTTTACATTGGTCATTGTATCGAGGGTTTTTTCTTACATTG	00
gen_289	GAAAATGGCAGTTCTCAAACCATGGTGGTCATACCCTATATAGACAGGGATTTAGGTATGTATGCGGTCACGAATTTTGT	00
gen_290	TTGTGGTTTTTTAGGTGATTCACAACAAGTGTACCTTTGTCATTAGATATTATTATATTGTAGCTATTGAAGGGTTAACA	00
gen_291	TCATTTAAGCAACGGCTTGGAGAATACGTTTTATATAAGTATCGAAGAGTGATATCAGTATTTAAATCGATTACATTCAT	00
gen_292	TCTACATGCGTGTGGTTAGTTCTATAACCATATCAGGTCAAAATGTGACTAGTTACTGATATCATCATTGGGTTCTCTTT	00
gen_293	TCATTCCTGAGGCAATTGGCTAACCTTTCGTCAAAGAACAAATCCTGTACTAAATTTGATTTCTAGGTTAGGGTATGTTA	00
gen_294	TGGCTTACGATGGCAGCAGGGGTTGAGGTCAGATACGAATAGGTGCAGTCTTGGAGAGCCTGTTGTTAGTGAGCGCCTGC	00
gen_295	TTGTCTAAAGTTGGATGGTTAGGGGCAGATAAAGCCCAGGAGTCTAGGGTTTACCAGGACATGTGCTTGGCTCTTGTAGA	00
gen_296	TTAAAGTATGTGGTCAAGACCGCACTGTGGTGGTCGTGGCCAAGGCCTGGTCCATGGGTTATGCCATGAGGTGTTTCCCT	00
gen_297	GTTGCTCTTATCTGTCGGTAGTTGGCTCTTAATTAATGCGTTAACTATTTCCTTATATGGTACTCCGTGATCATCGTTTT	00
gen_298	TGCACGATTAGAAATGCAAGAATTGCAGATACAAATCAAACTACCAGGCGTGTAGGGGACTCGTGGGGCTGGCGGTGTAT	00
gen_299	CTAAGTTAGTTATATCTGGTTAGTCTGAGGTTCGTATAGCCGGGAGTTGGGCATCAGGCAGTCTCTGATAGCTCAGGTGA	00
gen_300	ACTAACTAGGGACATATGAAGATCCTCTGAGGATGAGCACGTTATTGTATTTCGATAGTTGTGGATCACTACATGTCCGC	00
gen_301	TTTATAGTCGTAGCATGAGCGTACACTGTTGGTCCTTGTAGGCATCAGAAAGGTACGAGTCGATTTACACAGGAAGTCGG	00
gen_302	GAATTTCAGTCCTTCGAAAGGATGTTACGGCTTATCCAAGTTCTACAGTTTGAACACATTTATCAGGGTCAGCAGCGTGA	00
gen_303	CGGGACTCCTTCGTATCAATGTCTTCGTGAACATACGGTGATCTGCTCTAGATATCATACGATCATAGGGCAGACGTTCA	00
gen_304	CAGGTAATTCCCAGGTTAGTAGATTGTAACACGTTGTACATCTCACCCTATGAATTTTTAATAATGAGTAGGTTTGCACA	00
gen_305	TTTACTTCATTTTTAGGGATTATAGTGTGTATACGGCTGGGGATTAGAGGGTATGGTCGCGTTGGAGTCCTGGTACGATA	00
gen_306	GTTTGGGAACGTTACATTCTGGCATAGTAGTTCTGGTATTGTATTCTCTACAGGTACCAGCTCGTCCTCCACTGTGCAAA	00
gen_307	TACTATAGTGTCTTATAGGGGGTATGTTCAGAAGGGGGTACGACATAGTCCTGTCTATAGCAGCTGCTCATGGCAGATCT	00
gen_308	GGTTTAGCATTATTGTAATGTATCCATAGGTTCTGTACGCGGGTGTAAGCTCTAGAGGATACCCCCGGTCTCGAGACAGT	00
gen_309	TATAAAAGCATATAGGACAATGATCTTACAGAAGTTTGTACTCTCTTCAGATGGCGTGATCACTCTAGAAGTATGAACTT	00
gen_310	TTGTGTGAATGGGATCAATGATCAGTGAGTCTTGGAGCGCAAGGGTATTCTAGATACAATCTTTTTAGGCTTCAACACGA	00
gen_311	GAGTGAAGTCATACCTGGAGGTTAATCTGAATATATAAGATGTTGCACCGGGAGGCTACATACATGCTCCGAGCTTGCGT	00
gen_312	GGTAGGTGTAACAGGATCGGTCCAGAATTCTTCTAAGAGAGGAAGTGGACTGTCTATGGGACTTCGCAGTTTTTTCTTCT	00
gen_313	TTCGATTGGGTGTTTACACAGTACTATGCGTGATAACTTGGCGGCTACCTATCAGTTTTGGTGTCCCGGGTCGAATATGA	00
gen_314	AAGTCTCAGTTGGAATTCGTGAGGCATCATATGGGTTCATTTTGGGGCTCGATATAACTTGTTTCTATTAAAGAGGACGT	00
gen_315	TTGACACGTCAGATATTCTACCTGATGATTAGTGTCAGCTGTTTTCTCCCACGCTGGAAAAACTGGCGTCATTTATAGTA	00
gen_316	TGTATTTCTTAACAGTCGTCAGTGCTTGATGCTTAGTCTGGTGAGAAGCGGCTGATTCTACATCGCGGTAGAGGAGATGT	00
gen_317	TGGGGACGACAGATTGTAGTGTAGTTTACAATCAAAGCAGAGAGAATAGGCCATCAGTAGGGCACGACTTCACCTTCGGC	00
gen_318	TACTTGCATCGGTAAGAGGTGCGTAGCAATCGCCAGCTTGATTTAGGGATCTGGTAGTGAGGCCATGTCAAAAGCTACGA	00
gen_319	TTAGAAGGATGAACTGGTTATCTGTGCATTGGGGCGGGAGCAGTGATGCGTAAATGGTTTCCCCTGGTTAGACTTGCCTA	00
gen_320	CAAATCAAAGCTGAAATGTAACCTTAGCTGGTACGAGGGTTAAAATCTTGATATTCGAAGTAGGATCGGTGGAAGCCTGA	00
gen_321	ATTAGGTAGAGCAGGTATGAATGGATTTCCATCACTTTCGTCGAAGAACAATATCGTGACCCAAATTCAGGATCACGATA	00
gen_322	TATTATACAGGCCACTCGGATTCTCTACACTATCGATGCATGGATTGAGGTAATTTGATATACGGATGATGGCACGGTAT	00
gen_323	ATAGTACCAAGTCACTACCTTGGATGCCAAGGACGCAGTGATATAGGCTTATACGGGGTATCCTGCTGTGACGTGTGTTA	00
gen_324	AGTAATGCATCTATGGATGAAGGCCGCTATCGCTAATACACCCTGACTTTGGTTATGCCAAATCGTATCTGGGGGGTAAT	00
gen_325	TCGATAGTCAGCTTCAGCTCGCTGCTTTGTCTTCTGCTGACATGGGCTGCAGTGCTGTGAGGTTTGGAACAGTTTCAATG	00
gen_326	CAGTGGCAATAACTCCCGTATGTAGCACTTGGAGCCTAGGTTCATCGAAATCTGCGTGTGACATGGACGGGGCCATTGGA	00
gen_327	TATGGGCTTGCAGCATCTAGGCTTAGATAAGCGCCAATACGGAGAAAGGCTTAGTATGGTTCTGCGTGATGTGCAGTATG	00
gen_328	ATTGAGTTTTTAATGAAGGCATGACGGCTGCAGGATTCACCAGTGGGACGTTGTGCTGGTCCCTCCATGTTTGAACAATG	00
gen_329	TTGATGCATTTTAGTCAGCATGATTTGTTGTTACTGGATTATTCTAATTGTTATCGCGAATTACCAAGATGGGCACACGA	00
gen_330	GAACCCTTAGTTTATAAGTAAAACCTCATTGGTTCTGTGAGCCCCCGGATAATAGGCGAGTAAGGTTAAGGCTATATGTA	00
gen_331	TTATGTGGCCCCTTGTGCCAGTCGCAATCGTCCCTTTCAGCGAAGCTTGGCTTGATATCAGTAAATCAATGGGAGCTGAA	00
gen_332	CTCAACTCCAGCGTAACAGAATGTGAAATGGCATTGATTAGGTGCCCTATAATGCTGTGTGTTACGACGATGCTGTCAGT	00
gen_333	AGGGTACTAGTTCGTAGACGGTGGCGATAGCTGAACGGGACCGAAGTTCTATTCAACTCTGGACCTGCTCAAGCTGGGCA	00
gen_334	GATATGATGTCGGGGTAGAAGTTCGTGTTGTAGTCCAGTACTGGCATAAACTAGCACTAGATAGGCTTAACACGGTGAAG	00
gen_335	CGTTCACTAATGGTCCACAATGACATGAACTACCTCTTTATCTTAACCTCGCCGACTTTTCTCTTGTTTCTGCTGTTAGA	00
gen_336	AGCACATCTACTTGGCAGCACATGTTCGCTCAGGAAGATGAGATTGTGGTACCAATTGATGGGAGTATCTACTCTAACGA	00
gen_337	TACAAGTTCTGGCGGCTTCTGAATGTTTTATCGCATTCGTAACAATTGGCCTGTCGTCACCTGGGACCTTAGTCTAATAC	00
gen_338	GTGGTAACAGTCGTGATATCTTTGTAGCTAAGTGCGGACTGATGGAGTGGTCTATGAAGGGAGTGTTGCTGCGCTGCCCA	00
gen_339	CGAAGGGACTTCTTGGGCTATTCTGAATGCTTCTTGGTAAGTGCTAGCGTCGAATGAGTCTGGACCGATATAGTATTTGA	00
gen_340	AGTTAGGGTAGTTAATTAAATCGTTTTGGCTAAAATCAGACATTTAGGCTTATTATAGGCCTGCTTAAATGCGCTGCCAG	00
gen_341	TTCCCTCCAAAAAGCATCGCCACGACTATTATCTAGTGGTGGTTATTACTACAGGATAGGTGGGTTTTGCAGGCTTCTGT	00
gen_342	TGTCTCCTGTGCACCGATTGGGGGGGATGATTGTATAGCTGTAGCCGCCAGGGGATCGTTCGTTAGGCCTTGTTATGACA	00
gen_343	TATTCTACGGTACAGGAGCTCCTCCGAATGGATCATATGAGCCTTGTTCAGGATGGTGGGATGGTACCTTCCTGGTTGTC	00
gen_344	ACACGGAGTAACAAATGGATCAAGCTTGTTAATCACCATCGAATCGAACATCTGCAATCGCGAGTGGGGCTTGGTGGCAA	00
gen_345	TGTTTCAGGTACTGTTAAAGCCTTTGCGAATGAAGCCAGTTTATGGTAACCTGAAGCTACACACGAACTCGCGGCTGCGT	00
gen_346	TGTTCATTTCATATACATTTATTTAGTTCAGTTTATATCAGGTATTTTGCATTGCGAGATTATATTGATCTACCTACTTT	00
gen_347	CGATCTGATGCATCCCTGAGTGCTAGTGTCGTGGGACCGCAGTATCATACCTGGCGTTAGTCACTTGTGGGGTTCTGTCT	00
gen_348	CTATGAGACTGGGTTGATTTCTCATCATACAGGGCATCCGTTAGTGAGGTAAAAAGCGTTGGTATGTAGCCTTTGAGATG	00
gen_349	AAGGCTGACGGTTGGGGGCTATCAGATGTGGTAACGTCGAGGGCAGCTGAGTAGTGGGTACCGTGGGCGAAGACAGGTCA	00
gen_350	TATCCTATAGATTCAGTGTGTGCTCTGGTGAGCAGATGCTTGGATATACTTGGATTGACCTGACATCATGGCAGGGGCTC	00
gen_351	TCGTTTAAATAAGGCTAGTTTGTAGATTGGTTCGCGTTCTTTAGGACCTGTAAAGGCAGGTACTGCTAGTCCAATCAGGA	00
gen_352	TCTTACGGGTGAGATATTAGTAGCTGTGCGTCGATTCAGATCGGTGCTAGTATAGACAAAGGGTGCTTGTGTCATTGACA	00
gen_353	TGAGGCTTCATCTAAGGTCGTTGAAGTTGATGACAAGAGGATTATTATGCTTGATATACGTAGTCAAGGTAGGCGGATTG	00
gen_354	TCAGCTTATATGCTCTCCCCACTATTCCCAATCTTCGATTAAACTTCTTGGCAAATACAGTGCGCACAACTGTACCATGT	00
gen_355	AACAAGGGGGATTGCTTCAGAAGCTGAGCTGCACAGCGGCAGTACTTTGGACATCCTGGACTAATCAGCGGCTTTGCCGA	00
gen_356	TGTGAGGTTATGCTGTTATTCATTCCTCCTCTCGCGTTGCAAGCTGGCACTGTTTGGTTTCTTACCTAATTCGAGTTATT	00
gen_357	TTCTTCAGAATGAAATCCGTTCTAGATAGTGGAGGTTATGAAATCAATGTTGATTCTTCGGCATGACGATATGGAGACCA	00
gen_358	TACTCACATGATGTTAGAACTGAAGCGTTACTGTGGGGGTGTTTGTGTCAACACGGCTATGCGTGAGTGGTTCTTGACCT	00
gen_359	GAAGATTTCCTAATGGATCAAAGCCCTTGGGCACCTTTGTCAGTTAACAGCTCCTCAGATTTGTAAGTCGAGGTGGACAG	00
gen_360	ACTAGGTTCGGAATGAGTGGGTAGTTTTAGGGGCTTACGGTGGTTATAGGCGTCATGAGCTCGATGCTATAAGGTGTGGA	00
gen_361	TCGATGGAAATGGGGCAGGTTTCTAGTTTATATTGGTATTGTGTGTAGGCTTGACGTCTGAGGGTCATACGAAAATCTCT	00
gen_362	TGCAAAGCACGTCGTAGGCAGGGTCAACGAGAGGGAACAAGATACTAGATGTTCTTTCCGATCTTTGGATCCCACAATTA	00
gen_363	GAATTACGTTTTAGGTCTAATAACTTGCGTCCACCTATAGGCACATTCGTACGCTGCAATATGTTGCCCTCACATATCAT	00
gen_364	AGTTACAATTGGCAATTTGTTATTGAAGATACTGAGTTTTCAATACGGCGGCACTTTGTGGGTTTATAGGTGTGCACACC	00
gen_365	ATTTGGATCGAGTCCAGCGGGTCTTTCACCACATCACGTAGATACGGTTTCAGAAGGGAGCACATGGCGTGTTTATAGAT	00
gen_366	CTACTCATTTCTGAGTTCACCATTTTGACACGGTATCTACAGGCTTTCCTCCCACGTCCACTTTGGATCCTACGGTAATA	00
gen_367	TTGTATTGGATCGAGGTACACTGGAGTACGCTGTTTCATTTTGTTGCTTGCTGTTCTAAGCATATGAAGTTCGCTAATTA	00
gen_368	TCTTTTTACAGTATGAGTTGGTACGAGGGCAGCCCAACGTCAGCTTTTAGTGAGAGAGTCGTAGGCGGGCCCTGAGCTGT	00
gen_369	GTTTTAGGTGGTTTTTATGATTCTGAGTCTGAGAAGTACTCCGTGTTAACTGTACGACGTCCTTAGAGTTTAGTGCAGGA	00
gen_370	CTCTTAAGACAGTTGAGAAGGAACCTAATTAATGATGCTCGTATCCTAGAGCAGTACTAGTCGTATGGATTTACGATCGA	00
gen_371	CTCTATTGGATCTGCTCTTCTTAATTACATCATATTTATTTCCATCAGGATTCAATAGAGCATTTTCAATGCAGGCCACA	00
gen_372	TAGTTAATACGCCATTTTGTTATACGTTAGGGATAAAGTGTTTTATTTGTGGATGGATCTTAGATGGGTAGTTGAGACCA	00
gen_373	GATCTGAGTGCTATGTGTTTGTCTTCATGGATCCCAAATGAAGCCGGAAAACTTCCTTAAAGTTTCCTCCTACTGTGTGA	00
gen_374	TAGTAATTTGGTGGGTGTCTGTGCCATGTTAATGAAGGGTGGAACATGCCGCAGCGAATAAGCCTCGTGAATGTAGTACA	00
gen_375	CATATAATATTCTTTCAGTGTATTTTGAGGAATACGTAGATATTACTATCATATTGGTTTTGCAAGCTAAGTACATGGGA	00
gen_376	AAACGTTCTAGAATAAAGTGAGTATGGTGCTGTTAAAATCGAGTGGCTTCTATGCCGGATGTTTCGTGTGTAGGTTTCGA	00
gen_377	CACGAACTAGAATTAATTCTGACACTAGTATTTCAACTTATTGGGTTAAGTATGTGGCCGCTCATAGCGGATTGAGTCTG	00
gen_378	GGAAGTATGTACTGGAGTACAAAGGACGAGTTCATGTAGTGTTCGTATACTAGGCTTGAGAAGGACGGCGAGGAGGGGCA	00
gen_379	TCTAGGTGAGTCTGCAGTTAGGCGTTGCTTGCCCAGATTACTGATGCGGTTGAATATTGGTGTCAGATTCTTCTCTCATG	00
gen_380	CGAGCAATCGTCAAAGTGGTTTTGCACGTATTGGCTGTGTGTTGTGAGCTTTGTCCACTAATAAGCGCTGACAGGGTGTA	00
gen_381	ACTCAGTTAACATTCATAGGTATTCAGTTATTGGGCGATAGATACGTAGGTACCGTTCTAACATTTAAGGACCGAACGTA	00
gen_382	AGAGCTTATTGGGGTCGGCTTCCAAGATGGGGAGACGACAAGATGTTATCGCTCGTGGTGTTCACCGGTTAAAGCTTGTT	00
gen_383	TAAATAGATCTTGATGACAAGGGTACCATTTAGTGACCAGTCTTTATTGTTTAGCCACTTTTCGACAGTAATTTCACAAG	00
gen_384	GTAGTTTTTAAGGAATATAATGATCACTTAGTAGCGGTCCTAGAATAGACGGAGGATACGTAATCGTTACCAGGTGTTAC	00
gen_385	TGGTGCTCTCTTGAGAGGGCAGAACCTCCTCTGCAGCCTTAACTTTAGGTTTAATCGGTGCTCCCATGCTAGGTCGCGTA	00
gen_386	CTCGTAAACTTCTATGCCCTTACTGTATATGCCCCTGTATTTGTATCGTTGGCTCTATATCGATGGTTTTGGCAAATGGA	00
gen_387	ATTTGATGTAATGTACATACACCGGGCGTTGCTTCGTATTATAGGGATGTTCGATTATAAAGCCAGGTTTATTGATGTGG	00
gen_388	CCACAAGTAGAAATAATGTAGGCCGATGGTAGAATTGTATGTCTGTTTCGGATCCATCAGTTGTAATGAAGCTGACATGA	00
gen_389	TCGTGTTATAGGTTGTGAGAAGGTACCCTTATATTGATTGAATATGGCCGCTTATAATCTCGTCTTTTATATGTTTGTCT	00
gen_390	AGGATACAAGGGTAGGAGGCTGACGGCTAGCTGAGATAGCTAATTACTGCTCGGTCATGAATTGGTGGCGGTCGGGGTTA	00
gen_391	TTATCCGCATATGACCCACGTCATACTCTATTGATTTTAATGGTTAGAAGTTTTAGTCACCATCTGTTATTGTACGCTTA	00
gen_392	TTATTCTGGGTCTCACCTCGGTTCATTAAAATCTATTAATTGATACGATGCTATAACGGTATCAATTAGGAAGGCTAATA	00
gen_393	AACCTGTAGAATGGTATCTTCTACGGTGTCGCACACTAAGGATACTGGGACCCAGATCGTAGAAATTGGCGAGTACAATG	00
gen_394	ATTGGGTTCTATCATACTACGCAAGTGCACCTAGCAAGAGGGCGCAGAGGTGGCTCACAGTGGTTAGTGGGTGTAGCGGA	00
gen_395	AGCTGACCTGACTGGAATCGTCAGGCGGTTTTTACGTTCAGTGTCGAGGTAATAGTGAGTTACAACACACTGCACTTTAA	00
gen_396	ACTGAAATAAGCGAACTCTGGCCCTGGACATGGTTTCTCATATCCCGTAAGACATCGAAGTGTTTCCTCAATTTTATAAT	00
gen_397	GGTAGCAGAGAGCTTTCGAACGGTTGCAGGAATCATACGCATGCATTACTTCACACCGACTGGACAGTGGCCCGATAATG	00
gen_398	AATAGAGTAGAAGTTTAATTAAAAGGTTATCTGGCACGAGCTTCTGCGGATCATGCAGGGGTGTAGAATACTTCCTCCCT	00
gen_399	ATATCTTTTGGAAAACTAGTCTACAAAGGAAGCAAAGAAGCATTTCACAAAAAATCTTGTGGTGCCCCCTCAATTATGAA	00
gen_400	ATTCGTATAGGAAAACGAGATGGGCGGCTTGTTTCCTGATTGAGTGTTTATTGTGAACCGTCCTCTACAAGGTAGATGAT	00
gen_401	TTATACTTTCAGGAGGAGACCCTTGCACGTCACGTACGGTAATTTACCGCAAAGTTTTGGGTTAGTTTTACTCACGTATT	00
gen_402	TCAATTGCCTGAGTGAAGGGGTTCCTCTTTGTGATCAGACACTTAATTTAATTAGATTTCTCTGACGAGTTATAAACGAG	00
gen_403	TCAGGTCTAGGTTCATGTCTAGTGCACGAGAGACTAACGCCTGATTAAGGCCCCCAGTCCGGGCTAATAAGCAGCGGGTA	00
gen_404	TGTTAGGGGACATAAACAGGTAATTCTCGATTAACACGGCTCCAGAGTCGGTGGTACCTGCGGTAGTCAACGCTTATGGA	00
gen_405	TGGGTCGATGTGTGGCAGGTGGGGCGGTAACGACCGTGAGTAGAATATTGGCTAGGCAGTTGGAGGCCTGTTGCTCACGA	00
gen_406	TCTACTAGTCTTCGGCTAATGATTTAGTTGCATTTGGTGAAAAGTGCTATTCTGATTGTGGTGATACTACGTCGTGGGTA	00
gen_407	GTAGACCCAAATTCTTATCGTCGATAGGCCCAGTAGGCTTTCTTACTCATGGAGAAGCAGGACCGGCCCCCAGAGCTTCA	00
gen_408	CTTATGAAGAAGTATAATCTGTCTTAGAGCTGAGAGTCCGTGATTTGTTTTTAGGTACGTCACTTGAGTCAGCATGTGGA	00
gen_409	TATTGGCAGATAGGTAATATTTGTCAGGTTAGCATATTTATGTGTATTCAAATCCCTAAAGCGGCTTTTCTATTGCAATT	00
gen_410	GTCTCTATGGGAAGGTTCTTTTGTGAATGCTAGAACAAGAATTCTCGATATTCAAAGAATGACTCTCCTGGGAGCGGGGA	00
gen_411	TACTAATGAATGTCGGGTGGATATCCGTCGATTATTTGACGTATATACCAAGTGCGAGTTGGTGTTGGCGATAGTGGCTA	00
gen_412	TAACAGATGTATTGTAAAGTAGTCCGAGTCATCAAATGAAGGTTTTTGTCCACTAAAGCCTACGTAATGCACTGGGCACA	00
gen_413	CAGCGTAGATTTAGTAAATAGCTAGTCCCCAGTGATCCCGTTCCTCTTATAACGTGTGGTAGGGCATTTCTTTTGGGGTA	00
gen_414	TCGATATTGCGGGAATACGACGGTATATTTATTACGTAAATGATTATACTGTGGAGTCGAGGCTCGTTCGTTAATCATTG	00
gen_415	ATCCACACTCGAGCTAGCGGTTGATGGGGTGACCACAATTTGGGGTAGTGTAAGGCTCTGATTGGAGGGAAGGCTTCATA	00
gen_416	GATATCTACCTGAGTTATTTGTAGGACTCGAGTATTATTGGAGTCGATATATAAGAGTAGAATCGTTTCGAGCTTTAGAA	00
gen_417	CAAGTGGCCAGCTCTGTATTCATATATTGTTAACTGTAATTTGCGATATAACTAGGCGGACATAATAAATGAACAATCTA	00
gen_418	TCCTGGCTGACAGTTATAACCGTACTGAATGTGTCGTGTTATGACTTCCGGGGTCCTATGACTATGAGCGATGGGGACTA	00
gen_419	TCATTACTTTCTAATATCGTTTTACACAAGTAATTCAACGGCGGGGCTAGTCTCGCAGGGTATTTGGGTGATGCCTACGA	00
gen_420	ATGTAACATGACTTCACTCTTCCCGAGTGGGCTACCAAACTTGAGCCATAAGCCTGCAACTAGGATACCAGAACTGCTAA	00
gen_421	ACTGGTCAAGCCAGGTGTTTCAATTGCAATGAAGGGTGTTTAGATAGGTTATGCGACTCGCGATGGCTCGACTATTCGGT	00
gen_422	GAACCGCCCATCCAAAGCAGGATTGATTTGCTTTGGACGTGGTACGAAGCCTAATACTCTTCAATCTGGTTCGCTTAGTA	00
gen_423	TATTGGCATGTGGCTATCTTACGGAGAAATTAATGGAAGTTTCACCGACGTTGTTAATGGGAGACTAGACGAATTGTGTA	00
gen_424	GGTAGTAGAGGGTTAAGGTACTTTTTAGTGGGTAAGTTCCCCGTATTTCTGGTGGGTAATTGAAGTCTTGCATTTGCTTG	00
gen_425	AGTTTTGCACGTTGATGCTTGATATGCATTCTTCTGGCCATCTATTCTTGTCCTTTGCCGAAAATAAGTGCTCATCCTAT	00
gen_426	TTTGGTGTTGGTTAAGCCAGTTTCAGACTTTATGAATTTCGAGATTAAAGGCTGTTCTTTGGGCGTAGCAAGCGTTTCAC	00
gen_427	TCAGATTGCTGTTCTGACCGGTTGCATCTTTTAGTCTCTCGATTTATGGTTAGCGCAGTGGAGGACCACAAAGTTTCAGA	00
gen_428	TTAATCTCGATTCGGAACTTGATGGTCTGTTATGGGGCATGTGGGTTCTTCGTCGGTTAATTTGGGATTACATGGGTTGA	00
gen_429	AAGTGTGCACTGCTGGGTTCGTTCCATGAGATAACGTTTGCGTGATGTAACTGCTGGTGGGTGGTACCAGGCCCTTCCCA	00
gen_430	TCCTCGCCATGGGTTTCTGGACTTTCACTTGTGGAAGTTTAGACGATGGAGGGCTCATCTTTTTATTTTGATAGCTAGGA	00
gen_431	TAAGGGGGATAAATGGCCTTGGTCTACAAGGGTCTTCGAAGTCGTGGTCTAGGTACCGATCTCGCAGGGGCTGGGGCCTT	00
gen_432	TCAATGCTTTCGTGTTTCTAGATTTTGGGTCGGGTGTGGGGTGAACGTACGATAGGATGCTGGACTACCTGGGTCTGTTT	00
gen_433	TGTTCCCCTCATAGGGTTGCTATCTAGTAAACCCAGCTGTGGGATTCATAACGTTTCCGGGGTCAACATCATTCTTTTGA	00
gen_434	TCTGTATGTTCATGGTATGTTGAGTGTATCTGCCGGACAGCGGATTGCTCTGGTTACGGTGATCGGTGATCGTTTGCGGT	00
gen_435	TCATACTAAGTGGGTCATTGCCTACAATACCACTGAGGAGGTATGTCCCCAAAAGCTGGTTACAAACGAAAGCGACAAGC	00
gen_436	GATTGTATTCTGTAGAGATTAACTGTACTATATTTACCGTCGGTAGTCGAAAGGCTATTGTATCTATACGTTGGCTCAGG	00
gen_437	TTATAAGGTGCAGATTTACCTGTCGGATCCAAATACTAACGATGGTTGGATCGTTGCGGTGGTCGGTATCCCGTATGGTA	00
gen_438	CTTCGTTGCGTGCAGGTGTTGCATGTAACAACATTAGGTCGATCTGGTTAAGCTGTTTTTAGAGATAGTAAGGTCCGTTT	00
gen_439	CAGGTAGACATAAAAGTGTGCATAAAATCCTGCTTTGGAATTTGAATTGTGGGATAGCGTTACTGAGTTCCGACTTGTGC	00
gen_440	TTCTCTGAGTTAAGGGTGTTCGACTCCACAACTAATAACTTTTGTCATCTCAGGACGATGTAAGAATTGTGTTAGCGATT	00
gen_441	TGTTAGCATTTCCATTCCATTAAAAGATTCTCAGCCTGATTGGTTCCGCATATAGAATAGGTTTCCGTTGAGCAAATTTA	00
gen_442	TTATTAGCGAAGGGGTTTCACTGGGTCTCGTCTTGGTCAGAATCCTGGCCAAGGTAATTGAACTCCCCTCGACTTATGGT	00
gen_443	TTTGCATGTTTGCTTCGTTAATTCTTATATTCATTTCTGCTGCATGTAATATGTCTGCTTCGTAAAGAGCAAGATCAATT	00
gen_444	GTTGAAACTTGCTGTTGGTATCTCAAGCGAACATTATGAGCCGTTTTGGCTGGGGAGGGTTCGTGTTGGGGATATGGTTA	00
gen_445	TGTGTTCTAAGAAACTCGAGCAAGAACTGCTAGTTCTTTACAGGGAAGTTTCTTGTGGTTAGTTTCCATAAGTCCCTGTA	00
gen_446	ATGCAAGTTGGGTCGACCTGGGTAGTAAGTGTCGAAGAATGTCAGAACGTCATTCACCGTCACCAGTTGAGGCGAAACTA	00
gen_447	TTTCTAAGAGTATGTGACACAGTTATCCTTTATACTGATCCAGGAGTGGAAACTGAAAATTTCCGTTAATTATATCATAA	00
gen_448	CAACTTTAGATCCAGGTGTTATGTCGACGATGATCCCCTACCATTAATGAGATGCTATAGCTTACGAGATCTTTCTTCGA	00
gen_449	TGGTCGTATGAGATAGCCTATAATTAACGTTGCGATTGATAAGAATCGGCGTCGATGGCATTTTTGTTTCAAGCGTTTTG	00
gen_450	ACTTCATAGTAGCGTTGTGATTTATTGTGGCTGTTCGATGCGTCAACTAAGAACGTCCCGTCATTCTTGTAGCGAGTTGT	00
gen_451	CAACAAGCGTTATTGCGACATTAGACTTTTGCTCATCAAGAAAGTCACTCCAGGATCTTCTCGGCAATGGCCCAGTTCCA	00
gen_452	TAGGCTTCCGTAGGTTTTTTGAAGATTAGTGCAACAATATTCGAGCTGATCGCGGATCCAGGTGTGTCAGGGTGGCTCAC	00
gen_453	TAATGGGAGCAAGCAGATTGTTCAATTGCTCCCGATCCCATATTATTTGTATTTCACTCAGTGTTTCGTCTTGTCGACTT	00
gen_454	CTTGTACGTGCGTATAGTCGGCAGATAAGCTGCTTTCGTTAGGGATTTAAATATCGTGAATAATTGATAATACTACCACT	00
gen_455	TGATTGACTTAACCGATTAGGCACGTTAAGTAGATCTATTTCAAGAAGCACAGACTCTAGTTCGTAGTAGCCTGAATTAT	00
gen_456	AGTGTCATGTAATTATTCCTGTGCTAGCGAGACTGCTTATATTATAGTATCTGGAGCTGTTCTCGTTGCGAGCGTTCGAT	00
gen_457	TGCGTGTTATAATAGTACTATGTTGGGCATTAGGCTCGATGTATTTTTACGAGGTTCAAAGTCAAATAAATGTAGGACGT	00
gen_458	TGTTGTTGGAATGACCAGTCGTATTATGCGTTAGGTCGGACGTATGGTCTTAAAACCCCTGTGTAATTCAAGGCCTAGTG	00
gen_459	ATAAGTCATTACTCAGATCGGTAGAATCCATGCCAAGTGCGTTTCTTGAGCTCTGAACTAAGTTTACCGGGGCTCTACGT	00
gen_460	GACGGCTATTTCTGGAGAATTGTCGAGAAGTGATAACGATTCAGTAGTTGAGGTCACTACAGGTTCCATAATATTGACTC	00
gen_461	TATATAATCGATAAGCTTTGGGCTATTACATGTTAGGTTCTTATAGACTGTTTAGTGATGTAACTGGCAGATCAACCATT	00
gen_462	AAATGACCAATAGGCGTAGTGGTCTAAAAATTAGTACTTGTCAATGTCAACCTTGTCAGCTCAGTAGTCTTGTGAGTGAG	00
gen_463	AGGTCCTGTCGTTAGTTCGTGTATTTTGTAAGGTTTTGGCGATATCGTTCCTTTGTTACCTGTCCTACAAAGTAGGCTAA	00
gen_464	TAGTGTAAGTGTTGTCATTTAGGAATACGTGCGAGAACGTCGATCAGGCTTATTCTAGAGAATCGGAAGTGATGCTGACT	00
gen_465	TTCTTCGGTTCCAGGTATGGTGAGGTGGTTCCTGTTCCATACGGTTACGTCAAATTCTGATTTGTTTTGTCATGGTATGA	00
gen_466	ATCCTACCAGCGTTTATTTTTAGGCTCTGGTCGGAACTAGTGGTTCTGTGTGACCTGAATGATTGTCCATGTCCATGTAC	00
gen_467	TTCTGCGTTTGCACTAATTCATTACAAGAGAAGTAATCTTGATCAACTTAATCGACGTGCAAGGAGTTGGCGGATACAAT	00
gen_468	TGTTCTGAACTGAGGTGAATAAAGGTTCAGGTTATTTGGCTTTTTAATGAGGCCCGCTGTGGGAGTATGCTTGGAGCTAA	00
gen_469	GGATAGTGTTAATAGGGTTTCTTATTGCATTAATCCTTTTCTATTAAGCTGTTGACTATGCACAAAATCGTAGCTACAGT	00
gen_470	TCATCTTCCTGGGTGCAAAGCATCTCTCTTTCCATCGTAAAGTCAGTGGTACCCGTCAAGGCTAAATATCAAGACCACTA	00
gen_471	TCTATACCGCAATGGGTAAGAGGCTGAGTGTGCATGTTTGTTCGTGAGAAGCCAAGGGGTGAGTCGGTCTGGCTCTATGT	00
gen_472	TGTGAAGGTAGCAGTCCTTGCCCAGGTTTTGTACTTGTTCATGAAATGGTCATGATAATGACGGGTCTGGTCTCCCGCAT	00
gen_473	TGTCCCAGACAGGATGGACCTTGGATAGTATAAACATTGCAGGTTCGATTTGTTTATAGGCTGCCACTACTTCGCAGTGT	00
gen_474	CGATGTCGACATCAGACAAATAGGACCTTGAAATTGACTCTTTTGAGGTTCAAGGACCATGAAATGAATGGGCTCTGCTG	00
gen_475	TGTAGCGAAAGTGACTATCAAAGTGTGATCAGTGGGCGGTGAACAGCCTGCTGCCCACGGACGGCGACGGTTAAGGTCGA	00
gen_476	CTCGATCTAAACTCGGTTGTCGTATCTGTACACGCTCAGGGGGTGTAGTTTAGTACAGATTACTTAGCTGGGTGGCCCCT	00
gen_477	CATATGGGGGATTCAATCTGTATTAAGACTGATGGGGTTTTCAGGAAGTCAGCTTTATTCAACGATATAGATACGTTTTG	00
gen_478	TATCATGCACTGGGCATATCACCTTTGCCTGGTGAATCTATGCCATATCGAGCGGATTGAGATTATGACAAGGACGAGGG	00
gen_479	TGCGTTCAACTGGGATTCCTTTGTGGTATTCTATAGTACACGTACTGGAAGCCCTAGCGTGTACGCATCTCCAGCTGAGC	00
gen_480	CGTATGGCTTATTGGTTTTGGGTGGAAGCATTCAGTTATCTCGAATTGAGATCCATCTCGGCTGTCTTGAGACGTAGGTT	00
gen_481	TTTACGTGAGCTTACTATATTTAACGATCGCATCTGGTAATTCAATCATTTCCTTGATTGTTTCGATTGTGACTAGGTTA	00
gen_482	TTGCTTGGGGTGTGTCCCTGTATAGTTAATTGTTGCTAGTTTTATTTGGGCCTAGAAGGGTACTTCGACTTACGTTAACA	00
gen_483	TAGTATTAATCTAAGTTAATCAAAGGTATTCGGAGCTCGTGTTCAGCCAATGCAGGTCGTTTTAACCCCGTATTCCCCTT	00
gen_484	TGTAAGGCTTTCTACGCCGTTATTGACTGCCTACTGCGGATGTTGGCGAGTGTAGCTTTATGGAGGAAGAGGCCACACGT	00
gen_485	CCTTTGAGAAGATCTCATCTGTTCTCACTAAAACTCTATATACCAAGCCATAGCCTACGCTTTGTCTCACGGCAGGGATA	00
gen_486	TTTAAGTTGGCAATTTTTGGGACCTGTACGAATAGTCATAGGCAGTGCCTACGATATAACACCCTTATAAACTAGGTTGA	00
gen_487	TTCTGTCATGGCTACCATGGTGTTCACGTCTCCGTGCTCGATATCTTGGTTCGTGGTTATGGCGTTCTCCCCTTACGCAT	00
gen_488	CTTAGGTAGTGTTTAAAATAATCTGTCCTTCCTGATTTACTTGGCTGTTATCAGACTTGCCGGATCAATAGGCTTTTCGA	00
gen_489	TGTTTATCATTTTATGTCGGTTAGCACCATTTTTAAAGTCCAACGAATCTATCCATACGATACCGGGACGTTGCTAATCT	00
gen_490	CAAAACTACGAGTGTAATATTTGGCTTTGGCGCTTAACATTTTTGATCCTCGAATGCAGCGTTGCTGGGCTAGATGTAAC	00
gen_491	TGGCTCTACTCAGTTTCTTCGTAAGCTCCTTAGGTCAGCATTCATCCCAGACAAAAATGGTTTCGAGTGCTGGCACTCAT	00
gen_492	TGCACACTTACTATCCATCTCACTATCGTATCGCAATGATACGATCCCGCACTTCAATCTGGAAGCTTTTAGCTATCGTC	00
gen_493	GTAGGTGAACTTACGATTCATTATTTCATATCTCTCCAGCCAGAATTAAATCTCCGAAGGCTGACATGCCAATTTGGTTG	00
gen_494	ATGGATATGAAACTCGGTTGAGGTGGACCTGACCTTCGTTGGTGCGGTTACTACTTTATAATGGTGAAGCCTATATGTGC	00
gen_495	TACAAAATTAATCCTTTGTGGGACCAGTTGTATAATCGGTACAGATATGGTCAGCTCCACAGACATACTGTTTTGGATCA	00
gen_496	ATCTGACTATGCATAATGGCATGTCTCGGTAATTCTAACGCACCGAGAGTACATTTGATCTACCTTATCTGAGCTATTTT	00
gen_497	GTATATGAACTTAATTGTTTATTGGGAAAGATGTTATGCTCGGGTATGGGCTAAGTTAGATTAATTTATGTTCTGTTGCA	00
gen_498	AATTGGTTGGGTGGGACTGTGGTGGGTCTGATTTTTTGCTGATGGGAGGATTCTGGTAATTTTAACCAAGATACTAGGTC	00
gen_499	TTAAAGCGTTGTGTGGTATGTTCGATATACCTTTCATTTCAGATATTGAGACCCGGTACTGTAGATGCTGAAGCCCCGTT	00
gen_500	GAAGTGTAATTTCATTGGGCCTTGGTTGTTACGCCAGATAGTGGTTGCGTCTTCCAAATGTTACTAAGCATCGAAGCAGG	00
gen_501	ATTGAGTAGCTGCCTGCGTATAACCAGAACTGGAGGAGCAGATGGACACAGTGTCGATATCTTTGGGGGTAAATGGTGAT	00
gen_502	GAGGATGCAACGGTGTCACCTAATCGATCTGCCTAGTATGGGCTTGTGGGGTATAGTGGGTGCCCGATTCATGGGTCTTA	00
gen_503	TACATTTGGCTTCCTGGGTCCAGGCATTAGTTATGTACTAATTCATTGGAAAGAAGCGGGAGTTTTATACTGGGGTGCGA	00
gen_504	AGAACGTTTAGTGTTCTTTGGGATTTCCTAGTTGTCTTCACCTCTTCACCGTCTGTCGTCGCTAATCCTCAGGAATATTT	00
gen_505	ATTTTCAGTAATTGGTGCTCTTTGAACCGCTGGAAGCATTATGGCTTGTACCCGAGGTCACTGCAGTTGATGGGCGGAGT	00
gen_506	TGTGGCAGAACTGAACTTCTCTTTCAGCGAATTGCTTTAAAATGTTGTTGACGATTATAGGTAAGGCTGAATGCAACACA	00
gen_507	TCTATGGTCGTAGAAGTAGGTTAGTAATCTATTGAGCGGTTTACCGTGTAATTGGGTAGAGGCGAGAGAGGTTGTTCGTC	00
gen_508	TACTATAATTTTAATGGAGTTAAATGGGGATGACGGTTGTATAATATAAGGAATCCATGTACTATCTTTGCTTAGTCTCA	00
gen_509	CCAGCCTCTCCTGTGTGTTCAACGTTAAAACTTTCTAGGTTTAAGTTGGTGCAGACTCGGGATTGGCGTGCCACCAGCTA	00
gen_510	TGCACATCGTCTCTTCAAGATCATGGTGCCTTGGCTTGCGGAGGAGCTGGAGTACAGGTCGAACTCGAAGTGTGGCTGGA	00
gen_511	TGTAGCACTGTTCAAGAGTGTGGCTAAATTTGCTTTCCTTAAAGATATTTTTGGCGCTGATTTACTCGTTGGTGCACCCA	00
gen_512	TTTGAATATCGGGATGTAAATTTACTTTTGACAGTAGTCTTTTGTGTCCTTAGGGCTTTGGCACAGGTGGTTGGATGGGA	00
gen_513	TTCTCATATAAGGACGACATGTCTAGGAGCAGCTTAAGCCATGCCATGCGAATACGTTACAAAGCATGTCGAGGTAAATA	00
gen_514	ATTTGATTTACGAGGTGAGTATCAGGCCTACAATTTGTTGGGGTGCTCATGGTATGGTGTGTCGTGGAAGGTGGGCGAGA	00
gen_515	GAATTGTATACCTTATCGTGTATCTAAATCTGTGTATTTCGTTCTAGTCAGTTGCTGACAGAGATCCCAACGTGATATAA	00
gen_516	TATCGTACGGACTCTTATGAATGCTATTTGCGTTTTAGAACCAGTTCCCTAAACAAGCACCCATATCAAGCCAGTTGTGA	00
gen_517	ATCCTTGTCGTATCAAGTTGCGGGGTATATGTGTAGTCAATTTGGCATGTAGTTGGAATTCATTGTTAGAGGCTTCTGAA	00
gen_518	AGCGTACCGTAGCATTATGTACATAGATGATGTCGTCCAGTACTTATGGTAATTTGAAGGTATAACCATGCTTGTAGTCA	00
gen_519	ACCTATGTTTTTGTCGAAGTCGTCGAATCGACTAAGTTTCAATTTGTAAATTTAATTACGTTGCAGGGATAGGTCATCGA	00
gen_520	GACTATCGTAAAAGCTCAGCGATGCCTTTATATTGGCACTATCTTTGCGAACGTGTCAACGTGGAGTCCAGCCCCTCTGA	00
gen_521	TTAGAGTATCTGGATGACTTTACGAATGGGAGAGAAAACTGATTCATGGATATCAAGACGCCCGTCTATGTATCGACTTT	00
gen_522	AGCTTAGCAGTCGTAAAATGTTTTGTTGTATCACTCCTGGAACGATGCTAGCCGCTGGCTTACTTTGGTTTCGTTGGGGA	00
gen_523	TTCAATTGTGCTTCAATCTTATCTTTTGAGAAGTGTCGGTTATCGCGTCAAATGTCGTTTTGATTTGGGGTGATTCGTCA	00
gen_524	GTGGCTAATCTGGGTGTCCATGTCACATTAATAGGAGGGGATGTGGAGTTTAAGTGGTCAGGGACCCTTGGCGGCGCATA	00
gen_525	TGCTAGTTGTACTGATGCTAGTCTGTATTGGTAAAACGTGATTTTGCGGTCCAGGTCTGCCACTCAAATGCTGACGTATT	00
gen_526	CAGAAGCGGTACTGCTGTAGCAGGGTGGTTAGCTTTGTCATTTGGGTCAGAGTAGAGTGGCGTAGAGTCGATTAGATGTA	00
gen_527	ACTTGCGGTGGAAGACAATCTGTGTCAAGTCTCGGTTTTGAAGATCTCACTTGATTATCCAATGATAAGGGTAGGGTAGA	00
gen_528	ATACGTAAAATATGAACGGGGGATGATTTACTAGTATCGTGTGGATATCGGCGAGCATTAAGAGTTATGGGCATCACGAT	00
gen_529	GGTGGATGAGTACAGGACGGTCTGGCAGATATGTCGAACCCCTAGGTCCACGAAGGATCGAACCGTAGCGTCGTTTGGGA	00
gen_530	TCTGACTTGATGGGGGATGGCCCATTAGGAGTTTGTGGGCTACTTGGAGGAAATACTGACAGGTCATTTGCAGTCTGAGT	00
gen_531	AAATTGATTGTAACGTCGTGTAGTACTTAAGTGAGTTGGTTAAGTTTCGGATAAGGTCCGATCAGATTGTGACGTGGTTC	00
gen_532	ATTAGGCTGTGGAGTAGCGACGGAATGGGATCCCCATGAATCATGGACTGGCCCCAGTCTAAGTATGGTACCGGGGCCAG	00
gen_533	TGCGTGGGGAAGACCATGATCGAGCTCAAACTGTGGTCATAGTTTAGGGGTTCCTCAGGAGCAATTGGTCGTGTGCGCCT	00
gen_534	ATAGCTGTGTTAGCGTCCTTATAGTATCGAGGATTTTACTGTCTTATGTTGGGTGCATCAACCCAGGCATAAGGAACCTT	00
gen_535	TAACCTCTGGCAGTATGCCTGTTCTTGGGTAGCCATCGAAATCCTTAGGGTAGAATAAGGCCTTGTTATCGGCATTCAAT	00
gen_536	TAACGAGCCAGTGGTAGAGACTTGGCCCAATTCTGACTGCTAAATCGAGGCCGATTGGACGGAAAGTCCAATGTAGGCAA	00
gen_537	AACTGGTGTTTGCGTTTCTTCTTCTGGGTTCCTACTCTCTTAATCTCCTGTGGGTTGTGGTCTGAGTTAGGTACTCGACA	00
gen_538	ATTCAGGGAGGTGTCAATAAGTGAGATTATAGATTATGAGCACAAACACGTAATTGTTCGGTGGTGTGCCTGACTCGCCT	00
gen_539	CTAACCTTTGAGGTCCTAGTCCTCTGAATGCATTTTACTTAGCCTAGAAGCCTGGCAACGCTATTTGTGGGTTTGCATGA	00
gen_540	AACTACTGTTATGAAGCGATCATCGAACGTGTGGCAATTTTGAATGAAGTGGATTATCAGCGTTACTTAGTTACCTACAC	00
gen_541	TGAGCTAAAGCGTTATTGCCATTTTCACGGTTATGTATCCAATGGTCTGACGGCCAAGTTAGGTAGGTATTATCAGGTGT	00
gen_542	ATCTGGTAAGGCTGATGGTTGCTTTCCCGGTGATGTTAGTGTATATTGCGAAGTTGCATTCCCGAGGTAGGACGGTAGGT	00
gen_543	GATTATAGTGGTGTAGCGGTACCTTATACTTATCTCCTTACTAGTAGAGCTTTTCGTGAAGACACAGGGATTTAGTTAGT	00
gen_544	AATGGGTCTTGGGCAGGTCGGGTAGTATTGTTCACTGGCTTGGTTAGGATGGGCTGTTCAGCTCAAGATTGTCCTCTTCT	00
gen_545	AATCCCTCTGATTCTTTATCTGTTGTATGGAAGATTTATCCGCTGTTCTTAAGTCCCTACTTCCTGAATTGAGATAAAGT	00
gen_546	AGATAGTTTATCTATAGTTAGTTGCGCGGTTTTAAAATCATTGTCAGTTGATTCAATGTATGAGTACTGTGTGCACCCGA	00
gen_547	AAGTATTGTGTGCTACCGTCACCAGATCCTTTGCTATTTGGTCTGTCATCTTTCGGTTGGTTTGTTAGCTTTAAGGTACT	00
gen_548	GTTACGAAACATACATCATAGGTTGTATCTGGGCCACTGCCACTGTGTTCGTAAGGGTGTAGGCACCGCCACTGAGGCAA	00
gen_549	AACGGAATTGGTTTCATTCAACTGCCCACCGGGCCAGGTGAGGTACAGATAAACTCTGCCATTTTGTAAGTCGTCAGTTT	00
gen_550	AGTGTGTTGTACTGGCTTTTGTGCCTCACTAAAAATTAAATATTAAACGTATAGTGGGCTTTGGTAGGTTACATATAGAA	00
gen_551	TGTGAAGACATTCGTTACTTGTTCGTGCGGGCCCAGTAAACGGTAGGCCAGTTCAGGTACGACATCAATGGGTTGGGTCA	00
gen_552	AGGGTCTCAGGGCTAATGCAGTACTTGGGGGCCAACGATCTACTAAACGGTTTTGTGGTTACGGAAGATGAGTGCGACAA	00
gen_553	ATTTTCTGGTTGTCGTTGGCTTGGGAAGTCGAAATGGATTGGGATTAGTCGAGAAAGCAAAGGGTGGCATCCTATATTTA	00
gen_554	ATAGCGAGTTTAAACCTTATTGCAAGGTTGCTCGCTAGTCCTGGCGTATTATGTCTCTCGTGCATTCTATGCATATGGTA	00
gen_555	GGTTATAATAGAAATCAGTAGTTCTATGGGAAACGCACAGATGCTTTTCTAATTGATCCAACTAGTACTTGTTCCGCCCC	00
gen_556	TTTCTGTGGTATGACTTGTGCAGTGTTTACTCGCTGATCTGACACTCGGGAGGATACTAAGGTCAACGGAACATCGTTAT	00
gen_557	TTAACTTAATGGTATAGCGTAACGAAGTATCTTAACATGAAATTACGTCATTGGCGAGCTGTTGTTCTTGATTGATAAGG	00
gen_558	TCATGGACTGTTATTAAATAAGGTTCGGCTAATATCTTTCTTTTATGGTATTTTAAGGCCAGGTAGCAATAACCTTAACG	00
gen_559	AACTCAGGGTGTCTAGCTGATTTAGTCAGGTCGAACTAAACAGATTATACTTAGGTTTCAAAATTGTAATAGATTATACG	00
gen_560	ACGGCTAAGCAGATACGGTGAAGTAGTTGGTACCCTCCATCAATCGGTCCAGACGAGGGACCAGCAGAAGTGCAGTCGCA	00
gen_561	GGTAATCCTAATAGCGACTGCCCATTCACGCAATTATGTGGATGGTTTCGAACGTTTTTAGTTCGGGAGTATTGCGTGGA	00
gen_562	TTATTTAGTCTTATTTTAACCTTCCACCAAACAAGGAGTTCGAACAGTCTGCGACACGACTATTAGATTAACTGGCGGGA	00
gen_563	GGTTAGCGAATTGGTGTTCAGCAGCTCGACGGTCTGCTGACGAAGAACTCCATGGTGGAAGTGATGGATATCCATATTAG	00
gen_564	TAGGTGAATCAGTACTACCATTGTTAAAACATTTTGGCCCGGGCCTAGATATAACTGATTATATTATAATGCGTGGGCAT	00
gen_565	TCAAATGTCAACCGAGGTAGCCTATGCGACTCTAACCTCATGAGACAGTTCGAGTACGCTAGACCCTGAGTGGAGGGTGC	00
gen_566	CTGTTCCTCTAGGGTGCTTGGGGTTGTCGATGCAATCTGAGTACACAGACTCGAGCTATTTGAATGGACAAGCTTGACCA	00
gen_567	ATAGTTGAACATATGATTAAGTTCCTCTTGCGGGTGTTACTCCAGGCCGGCCTTCAAGTGGTTTAAGCGATGTACATTCA	00
gen_568	AAGTTGCGAGAGATTTGAATTGATCCATGTGGGAATGAAGGCCACAGGACATGTGTATGTAATGGTTGGCCGACGGGGGA	00
gen_569	GTCTGTTTCATTGCTAGCGAGTCGAAGTTGTGAAGGGCCAGGTGCTACTGGTTTGTGTTGGGCGACTGGACGATTGCTGA	00
gen_570	AGATTGGATGTTCGACTCTCACGTGTGGCAGTGGGACTTTGTGAAAGGCTCGATTAGGTCGATTGTAAATCATACGGATT	00
gen_571	TCGCTTGACTAGAACCATATACCGTCTGACCACTGCTTAGGGGTGCCTCGAACTACTGTTAAGAGTTCCCATCGCATTCA	00
gen_572	TTATGCGGATCGGTGCCAAGGGATATCAAACGAGTCTTGGTCATAGTCGATTGCTTTAGTAACATTGCAGTTTGGCGTGC	00
gen_573	CAATTTTACAAATCATAGTAGTTCTGATTGGAATGGGGTCAAGGGACGACCCGTCGAATCGGTGATACGTTCATTCCTGT	00
gen_574	ACATCATTTAGATAAGACGTTGTGGGAGCATGGAAAGCTGCATGAGTAGTAGGCCAGGTCCTCGTAGTAGCAAGGTCTTA	00
gen_575	TCGATAGGTCGAATTCATGTGTATGACGTTCTTGACATATTGATGGAATTGTTTGATTTTATTTAAGTGGTATTCCGGAT	00
gen_576	CTTGTTTGCTAAGTTAACTTATCTTTAACCAGATGCATGGACTGTGCATGAATCTTATTTATTGAGCATGAATCCGTGAC	00
gen_577	GTCTAGCAGTATAGCAAGGAGCACTGATCTTGAACTATTTAATGGTGTAGTCAAAAATGTTGTCAAAGGCTTGTCGCAAT	00
gen_578	TCAGAATTTGATCGTTCTTGCTGATGTGTGTACCTCGGATTGGCTTACAGTTTGCAGCGTTTTTTGAACTTTATGTTTGT	00
gen_579	GTTTACATTCGAATCAAGGTGGTAGTATACGAGGGTCAGAAGGTATCAGTACCTTCGGGGATCGAATCACGGCGGCTCTG	00
gen_580	TTCGTATAGGCCCAAAATAGTGGCATTTGTTCAGGCAGGACTGTACCTTTCATTTGCATCCGGCGATATTGCTATTTGGA	00
gen_581	GACTTGATGTATTAGGTATAATTTGATGTGGACGCACTCAATTTTTGTGATACATGAGTAGGGGGTTCATTGTATAGTTA	00
gen_582	TTAACAATATGAGTGCAGTGTCCTTCTTTCTCGATGCACTCGGAGTCCAGCAGATCCCTGAGATGAGTGAACTCTCCGGA	00
gen_583	TTAAACATATCTAGTGAATACGAGGGCCCTCCTTTCAAAATGGTCTGGGCAGGGCGTTCATTGAGGACGAAGGTAAAGGG	00
gen_584	CCTACTGAATATGAATTGACATGGGGGCATGGAATACGTTCGGCAGGTCGTCAGGGCTGTCTGTCAGTGGGTCGTCATGA	00
gen_585	TGCTGAGCAGTGCAGTATACCTGCTTTAGCCTCTACCTGTGATAGTTCCTACATATTCCAATCTTAGGTATGTCATTTTA	00
gen_586	TTACATATTGATGACTAGTATTACTCGATCACGTAATTTGGACATGAAGTCGGGACAATGCTATCGAGTGCAGAACCGTA	00
gen_587	GGTAGGCCTGGTAGCCTAACATACAAATGCGTGGCTTTGTTGAAAGGGCTTAAATGTGGTGAACGTTCACCCTGAGCTGC	00
gen_588	ATAAGTAAACGAGCGTTTTGGCGAACGAAGATGCTAGGATTGGGCCCTACCCATCCTCTTTTTGTATGTCATAATAATTA	00
gen_589	GATTAATTGCTACTTGACGAGAGAGACACCGGACTGTACAAGGTTTACCAGTTCCCAGTATGCCAATCCATAGCCTTATG	00
gen_590	ATTAGGCATGAGAAGGGAGGTCTAACTTGCTGATTACCATCCACATCCTGTTGACGGGGTGAGTCTTTTCAGTAGGCCCT	00
gen_591	CATATTATTGTTTTTGTAATTTCATGATTTCAGTATAGTAGTTCCGGTTTTGTTCAGCTGGGAGATCTGTACGACTGTGA	00
gen_592	TGTCGTTCCAGTATGATCTGTCACTGTTGATCTAGTAGCGCCCTCTTGGTGCGTGGTTAAGTTCGATTCGAACGTCTCCT	00
gen_593	GAGCAGGCGTTTGTACTGTGAACTTTGTTTGATGGTTTTGTGTACCTTAGGCGGGCTTCCCACTATAGGAGATGGTCAGA	00
gen_594	CATCCGATTTGATAGTCTTTTGTGACCATCGGTTGGGCCTATGTCACCATTTATGCCTCCTTCACTTGTTCAAACCGTGC	00
gen_595	TCATGGTGGGTTACTTAGTTTCCACAGTTAATGGCTGTCGTTCTTGTAGGATTTGATTGGCTATTAGTTAGGTTAGGTTA	00
gen_596	GTCTTATAAGGGTTAGCGATGCATGGATGGGGAGCTAAGCTTGCGATGACGGGAGCAGTCTTATTCGGGTGAACCGGTAA	00
gen_597	TCAGTATTATGACTTTTCAAAAGTTATAGGGTACGACTTGCCTTGATCGTCGGTGTACCCATCTATCATTAGACGTGAGT	00
gen_598	GATTAGAACTTAGACTATTTATAAGTGATTGCTTGGATGGTACTTATGGAGGAGACCCCAGACGACACGAGTTTACAGGT	00
gen_599	GAGCTAGCGGTGTGTAGGGTCTGTAGATTCTGTTATAGGCTTGAAGATTATTATGGTCATGCCCAGCGTGTTCAGAGGGA	00
gen_600	TAGATATTTAGAATGCCTGATTGGGGCTCGCTGTGTTTGGAGTGTCACATCCTCCACGAGTCTGCGACCTGTTAGCAAGA	00
gen_601	ATCCTAGTCCATTGGCCTTTTGTCCCACTACAGGCTTTATCTTTAACTTGGTTGGGAAGGTTCGATGTTAGAGCGCACGA	00
gen_602	GTAGCAGGCTCTATCTGTTCATGCTAGGCTCCATAATGATGTCACTATACCGCATGGGGGGTAAGGTAGGAAGCTGGCGA	00
gen_603	TACGTGTTGACTTGTTTTGCATGAGCTGCTAGCAGTCACTTGGTTGGGGGTTCATCCGGTCCCGGGAGGGCTTGTGGGAT	00
gen_604	GAGAGCAGTTACTAGATGCCTTGTCGTGCGTCAGGCGGATAGCACCAGCTAAACGGTTGGGAACAGAAGAATTTCGGCAA	00
gen_605	GTTCTTCTCTAGTAGTTATTGTTAACTATCAAATGTGGAAATTACTTCTCCACGGGTTCACCGCCTATGTGTGCGTGCTA	00
gen_606	TCTTGTCTCGATGCCCAATTATAGGAGTTTTCTGGGACGATGTCATTGTCTGAGTTATGACATGTTAGCGGATGTTAATT	00
gen_607	TGTGGAAGGTTTGTCGTTGTACTAGTAATTGAGATCTAAGGATTTCGGTCGTCAATTCTGCTTGTCGTTCGATCTTGATG	00
gen_608	TTTTCCACACTCATGCATTCATTAATGTCTTTAATGTTCGATAGAGTTATGGGCAGTTCTCGTCAGGCGCCATGTCTTTA	00
gen_609	TATTTCCTTCATGATTGTAAGACCCAAATTTGGTAATGTCGCAGTAGCGTAAATACCTCTCTCGAGATTAACCAGATGAT	00
gen_610	TGTCGGATTTGATGGACAGGGTGGACGTCAGTCGAGTGGTAATGCGGTAGACCGGGATGAGGTCGTGAGTGGTGTTGCGT	00
gen_611	AAAGTATTGATGTCGGAGGGTGTCGAAAGACCTGTTTCTGTAATGCTTCAGTGTGGGTTTGGTCTCTCCTCCCATGGTTA	00
gen_612	AACTAAAATCTGTTTCCTAGGTTTACAGGTCGCATCCACACATGTTATGTCGCTCAACTGGATACGGGGGTAAATAATCA	00
gen_613	GTCATTTTGTAGTTTCTGTTGGTCACAAGTGAAAGGGATTCGAGCCTCTCGTATCCGTTTCACATCATGGTCCCTTCCCA	00
gen_614	GTTCCACAAGGGTCTCGCTGTTCATAAGTTGAGATATCGTATCATGGGGTTAAGCGGGTCTCTCATGAAGTGATTGCGTC	00
gen_615	ACTTATAAACATTTGTGCAAGACCATTTGAATCTGGACTGTTACTAAAAAGCTTTGAGGTACTTCAGAAGAGGGCTTACA	00
gen_616	TGTTACTTGTTTAGGGATGTAGAAAGCGATCGGTGTGTACTTTACGTGAGAGGTCAGGCCCTTCTCACGTTATTTAGTCT	00
gen_617	CAGCAACCCCAGACCTGCTCAGGTTATTCCACAGTTTTTACTCGAATCGGTGTCTATTTCGACCTCGAGAGGTGTTTTTT	00
gen_618	TAATGGTTCTCTGTTAGCTCATGTTTCGGCGGTTGTGCCCAAGTCGGCCATCGCATAACGGTAAGGAAGATCCTTGGGAT	00
gen_619	TTATCATTTAATAAGCTCAGAGGAAAACTGGTGTTCTTTAAGGGCACTGCGAGGGAGGTTGGCGGGAGGGGCCATTAGTA	00
gen_620	GAAGTGCGTGATATCGAATGTATTTTACACTACCGATATGATTGATAGTAGACCTTATGCCTGGCGACACGAACAGGGGA	00
gen_621	TCTGTGTATTGCTGAATGGTTGTTATCCATACGACACCGGGTGTACCATGGTCCCGCAACGATTATGAGCCATGGCTTCC	00
gen_622	TGTGTACAGGTTGTCACCGTCTCTTAGTGGATAGTGGCATTGTTAAATACGTATCTGAGATAGCAAAAACCTGTAAAGAG	00
gen_623	TTCAATACTAGCTTACTAGGTGCTGTGGTTTCGGGAAACACATGTTAATTTAGTGTCCACTAACGTTGGCCGACCATTGA	00
gen_624	TTACTAAAGCATTGGGATGCTTATTTTCGTGTGCACCTCATCTACCTTGTTAATTGATTGATCTCTGTGATACAATCCTC	00
gen_625	TCGAAATGAAGTAGTTAAGCTGTCGTATGTGAGTGTGATTCGTCAACCCTCAGCGTATGTAGTAGTGGCAAAGTCTGTTC	00
gen_626	ATACAATGTGATAATATTGTCCCATCGTATTCGAGCTAAGGACTCTGGTTATGGAGCCGCCTCGCTGAGGGTGGACCATG	00
gen_627	TAGATTGGTTCCGATGTGTGCATAATAAGGAATGTTTCATTTCCTAAATTGTAATGTGGGATACGTTGCGTAATATACAT	00
gen_628	CTAAAGCAAGTGATCTCTTGAGAGGGCATTGAGGACTATGCCGTGGCCTGCCTCAGATTTAGGCATATATGAATATTCTG	00
gen_629	GAAGACTGGTGAGTATACAACTGTTACATTTACGATTAGCATTTTGTTCTGATATTGCCTAGTGTGTAGATGTCCCGTGA	00
gen_630	TTAAACTGTCTGATCCGATAGAGATGCGAATGAATTGGGACCTCTAATTGACTGTGATATGGATTACTATTTACACATTG	00
gen_631	CAACTCACGTATCGGTCCAGGCCATGCCCAAGAAACTATGGCTGGGTGATCAAAATCAGGACAGGAGAACTTAGTAGTTG	00
gen_632	AACATGCTGCTTTGAGTCTGCAGCGCATCACCGGGAAATGTACTTAAATGATAAGATAGGGTCAGAGTGAGACTTAGATT	00
gen_633	TTGGACTTCGGTGGATGCTACATAACACCATTGGAAAATTTGATTCACGAATGTGCGATATTCTAATACCTGGTGTGACA	00
gen_634	TCTGAGTCTTGCAAATAGTAATGCCACTATTCGTTTTGAATCTACAGCGCCGTCTAGTCTTGTAGCTTAGATTTGAGGTT	00
gen_635	TAATCCTGTTATGACCACGGCGAGGCATGTCCATCGGAGGCTGTGAAGAATTATAATATAATGGCTTCTAGGGTCTAAAC	00
gen_636	TCGACCCTCTACCCGTTGTGTGTAATGTTCCCTCGAACCGAAACTTTAACACAGGTGGTGGGGCTTGGTGGATTAATGAT	00
gen_637	AGCTTGGGTTAAAGTTACTTATTGTCGATTGCGGTCGCACCTAAATACATTAATAGTCTAGTTTTTTGTCGAGAGACTTT	00
gen_638	TCTGTCTCTGCTCAGTCAGTGAATAGGCTCGCAGTCACTTTAATGGAGGGTCCGATGCGATCTTGACCTGCATATTGCTT	00
gen_639	TTTTATGTCAGCATGCATTTGATCCTGCGTAGTCCAGTTCTTCATACTCTGGCAATGTGGGTGAAGGATAACTCACTCGC	00
gen_640	AGTGAGATCCAGTTGCGTAGTTCTTCCCTCATGTGGAAGTTAGGACTAAAAGCGCCTTCGTTCGTAGCCACCTGCTTTTG	00
gen_641	TATGGAACAAGGTCCCTTTTATAGGGGAGGGGTGACGGACTAGTGGGTACATGTAGAGCTTGGTGGTTCTAGAAGACTTA	00
gen_642	GATTGGTAGGGAGCGGTAGTTTAGGTTATTAGGTGTATACGGGACCATGGCTGGCAGATGTAAACAGGATAGTGGCTGTA	00
gen_643	AGAAGACTCTTGGTGAGAAATGCGTCTCATTTAGAGGTGAAATTAAATTCTTAGCTCTACATGTCAAGGGTGGTATAACA	00
gen_644	GAGACGTGTATGATGGCGTTTGGTGGACTGTACGATAGGGTAGTCAGACGCCAGGGCCGGGCAGTTCTGGAGTGTGACCA	00
gen_645	GACGTTGCTTGGGGTTAGACTTGAGGAAGCTGGCTGGTGCGTGGGAGAATCCGTTTAATGGATATGCAAAGGATTTGGTA	00
gen_646	CATCTAAGATTATCCGGGGATCAGGCAATGAGTGGAACGTCCTAATTGTCGTAGTCATCCACCACCATATTAATTTAGTA	00
gen_647	CACAGTACTTAATGCTGGATCATCTAAACATCCTATTCGAAATCAGTAGCGTAGGAACAATAGAGCGTGTGTAGAATCGA	00
gen_648	TCCTCTGCGAAGTCTTTGCCTTAAAGCTCTCCAGCGTGTTTGCATTTGTATGTATAAGGTGGACCTTCTGGCTCTTGGAG	00
gen_649	TCAGTCTGAACATTTACTGTTCTTATTTTAGGTTGCTCGTAAAGTGGACCAGGATAAGTTTATGTTCCGTTTATTTGTTT	00
gen_650	GTGTGGTTTTAGGGTATGCATACTTCTGGCTCTTTGTTATGCAAATTGGGTATCTGGATGAGTATTAGCAATGAAGGTTG	00
gen_651	AACAGGAATTATCCCAGACTTGAAATCAGACTTTGCTCGAGCTGTGCTGGAGATAGTATGGCTTTTTAGCCAAGCTCTCT	00
gen_652	GTACAGGGGGCTTAACGAGTCAGAGTGTGCACGGCTAATTAATTAACCGCCCAAAAATTGCATTGTAGTTTTAAATTTGT	00
gen_653	CCTTAGATTCATAAATTCTGTTTTTTAATTCTTGGTTTCATGTCTCAATACATGTTAACAGTTCACTGGTTTTATTAAAC	00
gen_654	CTACATAAGGATCGGCTTCAATTAAATTGTGGTTAGTGACTCCGTTCTTACTTATCATGTCTAGTCACAGTTTGTTACTT	00
gen_655	ATAGTTAGTAGTTCTATGATTAGTAGTGTGTCGGAATAGATGCGTTATCGTAGGGTCGTTTTGCTGAGTAATCACCGCAT	00
gen_656	AGCGGTGATCATGTTAGGGAACAATAGTAATTATTTGGTAGATTCTAGAGGTGGACGTCTTTAATTCTGCACCATGTTCT	00
gen_657	GGTAGGCAGTAGCGTTAAGCATGAGTTATCTTAGATTGAGTTGTTGGATACACATGACAGTTAAACGCTTTCAAAAGCTA	00
gen_658	ATTGGGTTTTAACTTAAATTGTTTCCATGTGTTTCATTTTTACCTGATACTATCAAACTGAATGCCTTCGTGACTACCTA	00
gen_659	GTTGTAATTAATTCTTTAATATCAAGTAGGTCGCGAATGGTCAATATCTGGTATGGATGCTCGTGGAATTTGGTGTATGT	00
gen_660	TTATTTCCTCACGTACATGCTTCGGATAATGTCTCACTATTAGTTTTACTGCACACTATTTGCGTACATGTGACTCGCTA	00
gen_661	GATAATCGCTTGTGAAGCTGGTGCGATGCGGATGCACTCTGATCAATCTATCAATCCTAGGCACAGGTATTTATGCTTTG	00
gen_662	GATTTCATAGCAGTCAGTTTGCCTTTTGGCGTTGGGATTATATGAGCTCCGGGGTAAGTGCCAACCGTCTCTATGATCGT	00
gen_663	TTAAGATAGTCCTTGATAGTAGAGCCCTCACATATATACAGGAGAGTAGGCCAGAAGAGTCTAGGGGAACGGGATTACGT	00
gen_664	TATCTGACACATATCGAATAAGCTTATCAGCTGCTCACAGGGGGACGATAGCATAGAGAAGGGTCCACATTGTGTCGTTA	00
gen_665	GTACATGTTGTATGCGAGAGGTTCCTTTGGTTCACTTACATCTTAAGCTCATCCGTAGTTAGTCCTCTACGAGTGTACAC	00
gen_666	AGTTTTATGTATTGTTGGTATAATACACGTTTTTAAGTGTTAACTTCTCTTTCCAACGTTGTCCAGATTATCAACTGTGT	00
gen_667	CTTATCAATGTATGAGATATCTGCGAGTCCTTACCTTCAAAGGGATGTCGATTAGCTGACGTTCTTGTTTAGAATTAATT	00
gen_668	TTTAGTAAGTTAGATAAGGTATAGGTACATTTCGGTTCTTTGAGGTATCCAACGATGCGTCCGTAGGACAGGGGCTGTCA	00
gen_669	AGCCATGTGCCAGGTTTATTTGGGCACGGATCATCAGTATTTGTTAACGGCATTGTACATTGGAGCCTACGTTTAGAGCT	00
gen_670	GGCTCAAGACCTACTCACTTAGGATGGATGTAGGAAATAGATTTACACGTTACAAAGAAGACCTGCTAGCTCGACTTCGA	00
gen_671	TTGATCATGAATTAATGGTCTCTGTATGGCGATAGGAGGGACTAGTCGGACACTCAGATCTAACGATTATGGATCAGTGG	00
gen_672	CATTTGATGGGTGCTTAGTCTTGTTGGGCATTGGGCAGCTTAGAAGGCGGGTGGTCTATCGATTTTGCCTTGGCGACTCA	00
gen_673	CCGTGAAGTGTTAGGCAGTAACTTTAGTGACATTATTCTATGGGGTACAAACGCTGGGTGGGGACTAAATGAGCGCAACA	00
gen_674	GGCGGTGGGGGGACAAAAGAAGAGAGCTTGAAGATCAAGTTAAGGCATCTGGCGTTCGAAAATGGATGATTTGATCGTAA	00
gen_675	AAGCCTGTACCGACGATTCTTGGAGTTCAGACTAGATGTGTTAGAGGTATCGAGTGAACTTCAGGTCGTGGGAATGCTGT	00
gen_676	ACGGTCTGTTATAGGGGGGGAAGCATCTATTTTACCTAGACAATGGAATTACGTCTTAAGCTGATGTGCGTGGATAGTGC	00
gen_677	GACAATCTCTCAAGTTTGCGACAGTAATCGCAGAATGTGTTCTAGACGGTGTTAGGTATGTTGTCGGGATTGGCATCCTG	00
gen_678	CTGCTATGTCACCACCAACCTCTGATACTAAACGTGGGATCTGGTTTCGGTGGCTAAATGCTAACAATCAAAGGTAGTCT	00
gen_679	AGTAAAAATGAATGTTGAAGCATATTGTAAGAGTCATCTACGTTTCCTCGATAGGGCGTAATAAGTCGGTATGCGTTTTA	00
gen_680	GATTTGTAGCGTAGGACAATGTGCTTCCTACAGGAGCAGTGGATAGTATATTTATAAGGCCTTGATTTGACGCTGTTCGA	00
gen_681	AATGATACCTCATACTATTCAATGGAGCGAGTGAAATAGGGTTTGTGCAAGTATGTAATCAGCTTCGTCAGGCTGAAGGT	00
gen_682	CTGGAACATAGTCAATCCTGTTCTTTATCAGTATGTTTACTAGGTTAGAGAACCGTGGTTCTTAAGTTTAGTTTGAGTGA	00
gen_683	CCTTACGATCGAAAACTAGGAAATTATCTTTGACGACATATCTCGTTTACATCTATAATTTCATTATGTTGATTCCATAT	00
gen_684	GGCTGACCCACGAGCCAATACCATAGTGCTGTAATGATATTGTGTGGACAGTGTGAACGGGAGTGAAGAACGGTAGAGGG	00
gen_685	CGGTGCAGTAGATGCCTTGTCCTGTGTAAACAAATAAGTTCAATCTTTTGAGGATTCCCACATCTTGGCTTGCAGTCGGT	00
gen_686	TTGAGAAATACTGTTTGTTCAATTAAGTGCCGGGTCGAATTTCCACTATATGCCTTATCAGGTTTGGTAGGCTTTGGTCA	00
gen_687	ATCGAAACTAACTGAAGTGGTTTGATGCCTCCCGAGCTCGCTTATTCACGTCCAAAATAGATTCATTTCGTCTACGGGTT	00
gen_688	ACACCACTTCTTCTCATGGCCTTACTTGATCTTTATAAGTTCCAGTAATTTGCGTAGCTCTTTCTAAGCTCCTTTGATGA	00
gen_689	CGGTTACAGCAATGGATTGCCATGGCTTCACCGTCTATATTCCTCGTGTCGAGCTCTTACAATGGTGGCATGTCTGCTTC	00
gen_690	CTAGAAAAGGTGGATGTCTTTCTAATTAGTAGGGGACTACTGACGGAACAATTGTCGTCAGAGGTCAGTGTATACGTTAC	00
gen_691	TCTTATGGGGTTTGTGATTTCAGTCACCTAAGAATGTATCTGGGCGGACTTGTTGCGAATGGTTCTAGTTTTTGATACCA	00
gen_692	AAACTTATGGCTAAGCGGTATCTTTCATGAACTACCGGGGACAAATCTCTGGACCTGCAATTCGGTGCATGGATGATTGA	00
gen_693	ACTGTGGATAAGGGATGGGTTACGTTTATGTTTTAGGATTCATGCTTTGACATATTGATAGGAATAAAACCGGGTATGGA	00
gen_694	GTCGAAACTATTATTAAAGAACCGTCATGGTAATCAGCACCTTTCTTCTTATAGAGCGTCCCAGGCTGGCATTAGTATGA	00
gen_695	ATTGGTGTGGAGCTAAATTAGTCAGGTAGAGCGATCATTACGATCAGGAGGCGACAGTATTGAGACGACCTTGGTGTCGC	00
gen_696	ATCATATTGTAGCTGTACTTGGAGATCCAGGCGAGTATGGAGGGTGGAGGCAATGCACCTGCGATGACTGTAAAGTGGGT	00
gen_697	AGATGCTTGCACGGTAGTAAAGCCTCTTAGGCTCAGATTGGGTGCCCTTGATGACGCTATCCTTTGAATGCAAACACCGG	00
gen_698	CACTAGTTCTAGGGGCAAAGACTCAAATTATTATTAAGAGTGTGGTTCAATAGTTTTTTCACGTCCCCATCATTCGTCGA	00
gen_699	TGTAGAAGATGAGTCCTGGTAAGTTTATTACATATTGTCTACTGAGGTGCGAAATGGGATTACGTAAATTGACTCCCTAC	00
gen_700	TGTTAGCAAGGCCTAATTGTATTGGAATCTGGGATCTGGACGAGGCTAACACATAGCTAGACGTGGTTCTGTAGGGTTAT	00
gen_701	ATGCCTTCATTTTAGACTAATCCAAGGTTCAAGACAACGCTAGTGTACAGTAGTTACGTTTAATAGAACTCGTCTCGAAG	00
gen_702	ATATAGAGGGCAGTAAGATACATTGGGTATAATCTAATTCACACTGCGTGGGAGACCCCAGCGGAGTCCACACCGTGAAA	00
gen_703	TCATGATCGACTTAAGGGCGGTTATCAACCTGGCATTTGTTGGCCTATGATTATCTTCAGGCCAGTCGGCTGCCCGCTCT	00
gen_704	TTTATGTGGGTTGGGATATGTCAGATATATTTTTGTATGTATATCTGTTAAATGGTGGAAAGGACATTTATGCATAGCTA	00
gen_705	TTTCGGGTCTATCATGATCAGATATAGCGACTTATTTATGTCTAGTTTAGCGTGTCAATTCAGGCCAGTCATGTGTAGGA	00
gen_706	GATACTTTCTGGGGGAATATCTTCTGTGATAACGTACTCGTATACCGTAAAGAAGCGGTATCAATTATGGAAGTGTCTGA	00
gen_707	CACGTACACAGGCGATGTTCATATGGGTAAAGACTTGGTAATGGGTATTTGGATTAGTACGCCAGTCGGGGGTTCGTCTA	00
gen_708	CTTTTGTTGACGATCATTTTATTGTTTAGGTCTTACCTGAATCTCTTAAAATAGTCTCCCGGCGTCTTCCTTGTTGGCAT	00
gen_709	TCTCTAGGTCCTGTTGTCTGCCGGCGACATGGGTCAATAAGGGTATTTCATAGTCTATTCGGGTTTTTAACTCAAGGTTA	00
gen_710	GACTCAGGTGTAAAGTCTCAAAATGTTGTGTTAAAGTAGAGTTTGGTATGTTAGGGCTGTCTGATACGTCAATGTAAGGT	00
gen_711	TGACTTGATTCTGTGCGTCCCAAGGAGAATTGCACTTCTCTTGGGGCAGTTTGCTTTCCCATCAAACACAGGGTTATGTT	00
gen_712	TCGCATATCATCATGAATGGGGCCTCGAGTGGAAAAGTCTCAGTTTTACTAGAGTCTAACGGTTGCATTACCACAATCGA	00
gen_713	ACCTACTTGGACACTGATGAAGTACCGTGCTGTTTTTAGTACTCATCAATAAGTAAGGTTCGCATGTAGCTTTTAGCCTA	00
gen_714	TCAGCCCTCTAATCGTGATAGCGATTTGGGCTTTGACATGTAAATTGGTAATACTACGGAGAAAGGCGGATAGGTCCTCA	00
gen_715	TATTTCAGTGGTAAAAGGTTGCGGCTTACGTAAAGCAGGTCTCGATTCATTCTTAGCCAGGATCATTCAGAATGTTATAA	00
gen_716	TTAACTTATGTGGGCATCTGCAGTTAGCGGCAAACAACTTATGTAGGTTAAACGGCTAAGATAAAAGGACAGGAAATGGG	00
gen_717	TGTGTTACGTTCTTCGTCCTACACTTTGATTTTATTTTAATGCTCCTCTCATACTGATGTGGCGACTCCTCTCTCTAGTA	00
gen_718	TCTGTTTGGGTTGGTTTATACTTTGTTTGCATGAGTGGGAGGGGGAAACAAAGCCAGCAGATTGAATTATTTGAGCCTCT	00
gen_719	AATGCTTATAATGTGCGTCTTGATGTGGTGACTCACATCAGCGATGTTGACCGGTGAGGAGTTTTGGTTTCGTACGATAA	00
gen_720	ATGTTCATAATACCACTAAGCTTAAACTCGATTACGTGTTAGGACCGAATCCAGCCACACGACACAGGTAGTTTGTTAGT	00
gen_721	TTTGTGGGGCAGTTAGCGGTTGCTGACGAGGGGCTGCATAAGGCGAGGTGGAGTTCTGGATGGTTAGAACTCAACATCGA	00
gen_722	AATTGATAAGGTATTTCATTTCTGCATGTGCTCTTAGGCCCACTGCCCTAGGACAAAGTGTGGTGGCTCCGTGAGTAGGC	00
gen_723	TATTAGTCACTGTCGTTTGTGGGCAAACATAAGTTAGTGTTATTCTGTAGGGCCAGGAATATTGCCACGGCGGTATTTGT	00
gen_724	CAGTCCCACTGGTATTTAATCAATGTGCAGAGTAACCTCTAATGGTCAAGTGCGACCGCCGGAGCATGTAGGGGTATTGA	00
gen_725	GATTCCTCTTTGGCGATCATGCGATCCTGAGCGTGAGCTGCTTGATATTTGGGATGGTCTGTGGAATTGTAGTGAGCATA	00
gen_726	TCACTCTGATGGACGTGATTATAGATGTATTCTTTGACTTTTGTGTATCGTCTATTAGTCAACATAGATCGCAATATCCT	00
gen_727	TATCACATGTTCGGTAGCGTTGGTGGCAGGACTATGCCTGTATTTGGGGCTCTATGCCTAACGCTCACATAAACTAGATA	00
gen_728	TCTCGATTTAACTTTATCCTAGAGGTGCAGCAAGGTCCTTTCTTACCAACGACAGCGATACCGTCCGGCAAGGGTCAGAG	00
gen_729	TTTAGGCTACATAAACTGGTTGAGGGCACGCACTACATTTGGTAACGAGGGATGGAGTAAGGTGTGTTGATCGCAAGTGC	00
gen_730	GTACATATCGAATCTGTGGGCGGGCGTTATTTCAGTGTCCCTTGTTGGGGCCCTGAGGCTGATTCGAGGATGGGGATCAT	00
gen_731	AATATGGGGTGTGCTAACTATTAGTAGTTACACTATGTATACGTATGGCCTTACACGTTTTATTGTGATGTCGTTGTTCG	00
gen_732	CTTGTTAGTCGTCAAGGCGTATTATGGTATATGATCAAACGGGTTTTGGGCAGCCTTAAGATTAGAGGAAATTTTGGGTG	00
gen_733	TAGTTTCCATTTATTAGGATCCCATGTAGAAGGCGTAGCCTTGGGATGTTAGTAACAAGGGGTGTTGGCGTTTGATTCCA	00
gen_734	ACATATCTAATAATAGGTCTAAGTTATGTAATGTGTGCGGGGAGTAAATTTATCTTAACACATAGTGGTAGATCATTCCT	00
gen_735	TATCCTGGGACTGGACGTTTAAAGCGGGCTATCAATGCTGGGGGGACCACTGGCCAAGCTGGTCCTCACGGGGGATTCCA	00
gen_736	GGTGTCGTCAACAATTGATATCAACTCTAATTATTATGTGACGCATCTTGAATGCTTGCGGAGCCCGACCCTGGGTAGTT	00
gen_737	TTTGATGATGGGCGAATTATCGATAGGAATGGTGTGTTGAGGTTGTTCCAGGCGACTCGCTTTGGATATGGTCTGTAAGT	00
gen_738	CGTCGTTTTAACTCACTGTTAATGGGCGTGCGACATTGTTAGGGTAGTGTTTCATACAGAGCACCCAGCAGGCCTGTGAT	00
gen_739	TTTATCTGTAGGGAACTGTAGTTCGTAGCCAAGTTGTCATACAAGTCAGACACTGACAAGTAACAAAGCTCGCAATGTTA	00
gen_740	CATTGAGACGAGCTTATTCTGAGTTGCAAGAGAGCTCACATTGTGTGGACGGCTGACGAGCTGACGTGATCTCTGTAACT	00
gen_741	TAGATTTGTGATGTTGTTTCCTGATGCAACTTCAAGTGATCACGAGGGTCTCGTACGACATGGCCCTGGTCGTCGTGGTA	00
gen_742	TCTATTAAGTTGCACTTGAGGGCATAAACATAAGTCTTGAACGGTTAGGGATCCGAATAGGCCTGGCGGCACCCGTAGGT	00
gen_743	GTTGTTATGAATGTGTGCACAGGCGTTGTTACAACGGCATAATGTAGAAGCAATGGTATACTTTAACGCTCAATATAAGA	00
gen_744	ATTGCATCTTCATATTGAGGAGTTTTTGCTATGACTTATTACTGTCTGAGCTCTGTATAATACTGACTGGGATTAGCTAA	00
gen_745	AATGTACGAGATTAACCTAAGGTCTCGACTGTCTGTTAACTATTGGCTATGGCGGCTGTAGAAAAGGGGACGTAGGTCGA	00
gen_746	TCTTACCGAACGAATCGTGGTATATGAAGTGCATCTCATTTCTTCGATCTTCTAGTTACTGGGAACACCAGAATTCGATT	00
gen_747	TGGGGCTTAGAGGGTTTTCAATTGGGTTGAAAGCTGGGCATAGAGGATGCTGTCGTAGGTTACTGTACTCTACGGTCGCG	00
gen_748	TTGGCACGTCGTGACCTATGAGTTTGGCAGTAAGAGTAGTTATGGGTTGGTATTCCTAGGATAAAATATAAAATACTGTA	00
gen_749	AGGAAGTTTCACTGGGTATGAGGCATATTTTGTAGCTATATGTCTGCGTTAAATTATGGATTGTAGAACAGTGTACCCGA	00
gen_750	TAAACCAGGGGTGTATCCCATTATTAAAGCATGATTTAGTGCGATTGACCCCATTGACCTGCCTAGAATCTTCATGATCG	00
gen_751	CATAGAGTGGAGCATCTCTATCACTTTTTAGATACTGAAAAGTGAGTAGCATGTCTACCGGCAGAGCATACTGCATGTCA	00
gen_752	AGTTATGGTGTGCTCCGTTTGTTTGATTGTTATTTCCCCATCATTGATTAAGATGTATTTATGATTTGCGAGCTAACTAA	00
gen_753	TAGTATTGTTTTATAGTCCCGGGTTCAATTAGCCCTGATTCTCAACTACTTAGATCACTTAACTACCCACGAGTTTCGTA	00
gen_754	ATAGCAGAGCAGGGCGATGCAATAGGCTCCAGCCCATATGCCTCTCTAAATTACTGATGGGGCTAATAGAGGCTCCAAGT	00
gen_755	TTGGAACCTTCGGGTGGCCATCGTATGCAAGTAACGGGTCCCAGTGGGTCTGTGTCCCAAAGGGCTCGACTCTGGCGTAA	00
gen_756	TCGACCCACAGCTAATTCCTTACAATTGACAGGGCATTGGGGCAACTCTAGATCTACTGAACCTCTGCGCTCTGATGTAT	00
gen_757	TGAGGCAGGAACTTCTGCCGTAGTAATTCGAAATCTGTAGTGGAGTTGCAAGCTGGTCGAGGCTCTACGGCTTATGGCGA	00
gen_758	TGTCGATCAGCGACGTGTAGCCTGGCGATATGTTGGTGACGAGTGGTTAGCGATAGCGGGAGTGTCAGTGTGACATGATA	00
gen_759	AGATGGAGGATGTCACCTAGCTAGCTCCCCCGAGGTGTTGTTGTGGGTTGGCAAGGGAGATTTTTGTTTGCTGCACAAGT	00
gen_760	TCGCCTATATTAAGAGAACGTTTTGCATCTTTAGGGACGTGGCCCCAAGGTGCTTATCAGACGGTGGATAATTTCAAGGA	00
gen_761	TTGTACAGTGGGGGATAGTCAGACGGTGGTTTTGGCGGCTGTGAGTTAATACTAAATATTTGAGTGTATCCAGATAAGTT	00
gen_762	TTATCCTAGGAATACGACATTTCGCATGTGAGCTGCGGCAGGTTTGCCCTCCTCCCCTCGTGATGGAGGCCAGGGTCTGT	00
gen_763	TCAAATAGTCACATTTTTATAGTTATGATGGTATCGAACGCAGGGGATGGCAAAGGCATAAATCTGAATGCTAGCTTCTG	00
gen_764	TGTAGCGATGTGTTCTAAACGAGTCTCATACTTTCACCTCTTTATGTACATAGGTTATGTGATTGAACTCTCCTTGGCTA	00
gen_765	GTGACAGTGAATTGTAAGTTAGTTGATGGAAGTAGTCCAGGCGACAGTGCTTTGTCCCTCTCAGCAGCGAGGACGTTTGA	00
gen_766	TCGTGAGAACTAATTTTGGAATCTAGTGAACGCAGCATCGTCTCCCAAAGTTAAATATGTTAGGGCGATTGTCTTAGTCT	00
gen_767	TGTTGTGTGTAGCGTTGGGCTCTAGAATGGATCTTGTCATCTCGTGGTATGATCACTTAAGGTGAGCACGGTTGCAGGGG	00
gen_768	ATTGGAAATTGAGAATCAATGTCAATGTCGACACTCACATGCCCTGAAATCTCGGGGAATCTCACTGGTCCCTTAGTAAT	00
gen_769	TGGTTAGGACGTTGTAATTGGCATGAAAGGGTACAGAAGTTGCAAACCGCATTTTCAGGAATTGCGGACTATAGTGGAGA	00
gen_770	GTAGATAATAAGGTAGTGCTAGGGGGTTTACTTGAGACCTGTCTTAGCAGATTTGTGGTGTGACCAGGGCATACACGCAA	00
gen_771	GTATATCTTGGTATAAGTGCGGATCTTCCATTTTGGCTTCATAGTTCATGTTAGCACGGCTCCTGTCGATGTCGACATGC	00
gen_772	TATCCCAGATAGACACTCCAATGTGACTTATCGCTGCGTGGTGTGTGGCTAACCGGTTACAGGTTGGCCTGCCATCCCTG	00
gen_773	TCAACAGCATCCACTATGCGTGTTCAGTTGGCTTGGATCCGATAGTTCAGTTCAGCTATCGAAATGGATCCAGGGGCTGT	00
gen_774	TGCACACAGTGTGGGTTTGGTGTTCTACAAAGACATAAATAGTTGTAAAGTCGCCGAGGCAACCAATGTGGGTGCGACGT	00
gen_775	CTTTAATCGTGGGATTGTGCCGATGGTTGGGATGAGATCAATCCGTCATATGCATCCACACACAGATTGCCCCGTGTCGA	00
gen_776	TGTGTGAGCTACTTAATTCATATTCCTAATTGCAGTTGAAGGGCATTACTTTAGTATGTATACGCGGGTTTAATCACGTA	00
gen_777	TGAGCAACAGGGTTTAGTGTAACGTAGGGTCGGAGCGACTGTGCTGATCAGTATGTCTTTCGAACGGATAGGTCGGCAAT	00
gen_778	CACTTTTCAGGGTGGGACATGGTTCCATGAGACTCTTCTATTATATTCACCTATGCCCATTCTGCAATGTGCGTACTAAT	00
gen_779	AATGTTACTTCTTGGAATTCTTTTCTTTAGCAGGCTAGTGTTATAGGTTCATGTATCTCTTACAAATGGAGATATATGAT	00
gen_780	CTTCATCTTAAGTTCGATGGCCATTACAGAGCCGCTAGTACACGAGCGTTGAGGGTAGTCAGTCAAGCCTTGAGGCCCAG	00
gen_781	TAATTGTAGTCAGTCTGATTAAGTTTGGTATTCTGAGCACTGTTGGGATTAAAGGGACCGTCAGCTGGGTCAGCGTTTGG	00
gen_782	TCGATTCTTCGAGAGTTCGTGGTTCGTAACTTAGTGATCATATAATTTAAGTGGTGTTTTGAGTTTTTTGAATATGAGAT	00
gen_783	TCGTAGGTTAAAGGGAATTGGCTCGTTTGGAGTGTTTCGTTTGTCTCTTGTGATTTCATTGAATTGCATGGGTTCATTGA	00
gen_784	ATCACGATTCAGATTAGTTCTGATACATGGAGCCTCGTAGATTATCCGCTTCAGTTGGTTACCACTGTCATATCCCCTAT	00
gen_785	TCAGGCGTATTGCTACCGCTTGAACTGGCTCATCGTTGGATTAATCCCTTTTTGAGTTCACACGGTCTTTGGGTTGGGGG	00
gen_786	GGTGTGGTATGGGCCATCCTCGTTAGCGATTAGATCTGCTCACCAGGCTAATGGCAACAATGTACAACGTTGCGTAATAA	00
gen_787	TTGTTAGATCGGATTTTGCTTACCTCAACACTTGTGAATAGTTAGATCCTGCATACGGGGTGGAGAGGGTAGAATAGGGA	00
gen_788	CTTTCAGTGTGGGTAGTTTCAGTTTATGTCAGTTTTACAACATTATGTCATTATATGAGTTGTTTTAACGGTATATGGGA	00
gen_789	GAGCACTACAGATTGGCCAGTTTTCTGATCTTGACGCCAGCCTAGATGATTCTGGGGGGATTGGCTAGTTGGTCTCGACT	00
gen_790	ATCCTTTGTTAGCCGTGTTGGCGATTGACAAACATAGGTCGAAGTAATGTGATATTTCTATTGGTTGTTGGCCTGCGTCT	00
gen_791	TTCCACATCTCAATTGATAGTAGGCATATGGTCCATGTAATCAAGCTTACTATGGTTTTTGTTCAGAGTTCTGGGAAGGA	00
gen_792	TTGGGACTCCCACTTCAAGTACATGGGGTGGTTTACAGGTTACGTGCACTTCGAAGCTCTGCCAGCCGCGGTTGGTTCCA	00
gen_793	TGAGACTGGTCCTATATAAAAAGGACTTTGAGTCTGGTATCAGCAGATATTTTAGCACTGCCAGTGTTGGGGATCCCATG	00
gen_794	TGGGTCAATTATCGGTTGTGGCTTTCGATGTGGCCACATAATAATTACAGCAGTGTCTCCTGCGATTTGCGTCAAGCTAA	00
gen_795	GAGTTATCTAATGTTAGCTGTGCCTTATGTCATGTGGTCATCGGACGTATGGTACAGTTGGCAGTAAGAGTGTACACCAA	00
gen_796	TCTGTGCTAATGCATATCTGGCAGGGTGGACATCATACGATCTAGGCTTGGTTGTGCAATTGTAACGTAATAAGCCCTCA	00
gen_797	CGTGGCTAAAAGGAGCATTTACTCACTGCAGTATCCGTAGCTTTCAGTGCAGACTACCTGTATGACATCCGGCAGCTTTA	00
gen_798	ACGTTTTAGTCGTATGATAATCAGGTAGAGCCTTATGACGGCCATACATGTGTTATTCTGTGCTATCGCATCGTAAACGA	00
gen_799	TCGACAACGATTAGTGTATCCAAGCGGGATGACTTTCCATTAGTAATAGATTCTAATAAATAAAGTGTCCATACAATTGC	00
gen_800	CATTGGTGGTAGAGCAGTCATAGTATGGTTTATTGCCTCGATATAGGCAGTCTGGGAGTAGAGTAGATATTCATGGGGAC	00
gen_801	CGTTTTGATGCTAGCTTTGGTCGTAAGCTTATTGAACGTGCAATTATCCGCAAGTTGGTTGACATAGTTATATGGACATG	00
gen_802	CAGGAAAATGTGGCATCACCAGATTTAAAGTAGGCTGCTCCTAGTGGTTACTCAGGCGCCTCAGCGGTTCAGAAGTTCCT	00
gen_803	TAGCATGGGGATTATGATCAGCACCTCATATAGTTAAGACTCTCAGTGGTTAATAGAGCACAGCCCGGCACAGTCTCATC	00
gen_804	CATGGTATGTAGGCTATATACTCGGTTCGTCAGATTCTTTTAGTCAACTAATCAACAAGTGCACACGATCGTGACTTGAT	00
gen_805	TTATACAGTTTCAAGCAGTTTTCAATAACATTGTAGTAGACTCGTGGTCGCCTCGCCACACATCACTAAAATGAGTATGG	00
gen_806	TTGTGAGGCATTCTGGACCGTATAAGGTTTCTCCCATTCGCTTTGAGCATCGAGTTCTGGTGATATGATTTCCGTAGTCA	00
gen_807	TGTATCTGCAAGGGCTATGTGGTTGATGTAAGTGCAGGAGGGGACTAAGGCCGCTAGTTCGAGGCGGGACGTGTCACAAA	00
gen_808	TTCGAATGAGCTGAATCATTTATATGGACTGTATTACCGAATTCTGCAAAGGTTTGTTGATGCACGACGGCGTTGTAGAA	00
gen_809	TGACAGATAGTGGAGGACATTGGTGTCACGGTACTAGGCTACGGCTATGGCGGCCCCAGATAGGCGAGAGTTGTGTTATT	00
gen_810	GTCGAAGGAGGCGTTCTTGGTATGTTTGTGGTAGGTATTTAGAGCTAGCCAACGACCCCACGTCATAGGGAAGAGATTTT	00
gen_811	TTTAGGAGTTAGTCTCGGTTTGAGCATCGGAGGGTATACGTATGTCACTTCTGTATACGGGGCTTTAGGTTTATCTTAGT	00
gen_812	TGGAGTGGTTACATTCTGTTATGGTATTTAGTTCCTGAGGACGGATGAGGTAACGTACGTGAACTGATGACAAGGATTTG	00
gen_813	CCGATTGTTAATGAAGTAAGGCTAACACTGCCCTAGTTTACCATATCCAAAGACTTTACAATAAAACTAGCGTCAGGAAG	00
gen_814	GATATTTGAAAGTATAATTGGAGGCATACTGTTTTGGATAATGGTATATTGAGGGCGCATCAGATGCGTGGCTTATTATG	00
gen_815	TCATTCTTAAGTAAATGGTGCTATGGAATAAACAGGGTTGAATCTTGTTTATTAGTTTTGTTCATCGTGATACGTAGAGT	00
gen_816	AATTCGAAAGAGAGGTGCTAGTCTGTATTGAGTAGTAGCTGTGGGTGATGGGAGCAAGCGCTGGCCCAGCTCGGGGACCA	00
gen_817	TCGAGCTGTCTTATGAACCCATGCTTCTCTAAGGAACTCTTTACTCTGAAAAATTCTATCTCGTCGTTGCCTACCTACGT	00
gen_818	TATTTTGAGCTTAGGGTTAACACCTCTTTGGAAATAGGTGAGAGCCTGACTGTTGGCACTCCAAGTGGTTTGCTAAGTAC	00
gen_819	TCAATGAATGCTCCATTGGATACGTGAAATGTTTATAGGTCTTTTATGTGCGACCCCACTTAATGGTGACCTCTGATATG	00
gen_820	GTTGGAGAACATTTATGAGCAGCTCTAGATCGTTTATTTGGACGTCGCATAACTTCGTCTTGTGATGAAGCATCAGACAT	00
gen_821	CCAGCTTCGATTTAGTGTCTGGGGGAATGAGATACAATGAATGTTTTGAGGTTAATCCTCGGTTCTGGTAGGTTGGAGTT	00
gen_822	ATCCTAGCATTCAGTCGAGTGAACGATCTACTTGTGGATGCTTGCTAAAATCTCATCTATTGTCAGGCGATGAAGATCGA	00
gen_823	GTTTCGTAGTAAGATTAACGAGAGATTATGGCTCGGTCTTAGATTGTGGGCGATGGGTAGTACTTCATTATGGCTAGGTT	00
gen_824	CTAAGTTCATATGAGTCGTGTTCGCTCGTAGGTTAGGGAAGACTCAGCATCTGACGTTATTGGTGGCAGCTTCGATTCCA	00
gen_825	GTTCAAACCCTAGGTGGAGAACTCCTATTAGTTTAGCGTATTGTCATTTAGTGTACTACCAGCGTTGCCTGTGGCTGGGA	00
gen_826	GTTTTGGTCAACTTCGTTTTTAAGCAGTTTATCCTTTGCCAAGTTAGCCATAGCCGCCACTGTTATTTGAGTCCCGAATG	00
gen_827	GTAAGCAGATCACTTGTGTTTGGATGTAAGTAGCCGCAGTAATACGCATTTATTAGTCTGAGGGGATGGATTTATGCGAT	00
gen_828	TTCCTCCAAAGGAAAGGGACACCGTGGGCATTCTAGGTTAACTGTCGAGCCATGTGCACCTATTCATCGGCAAAGGTCAA	00
gen_829	TAACGTATGGTTGTTATTGATCGTGTGCAGGTAAGACTTCATTACCTTCATACTTTCTTAATTTGGTTATTATCGGGTTC	00
gen_830	ACAGAGTGTATCCTAACACAGCGACGTACGTTGGGGTTATTACATGCATGGCTTGAGTGGGACCCATTTGTGGGCAAGAG	00
gen_831	TCTCTGGGTATTTCTTATTTGGAATGGTGGGCGTTCTATTTAGCCCTCGACATACTAGTTTCCTGATCGACTGATTACAA	00
gen_832	GAATCTTCTTAATTTGCGTATGTCCTAGATCAATGCTGCACGAGCGAATACGAGGAAAGTAGGCATCTAACTGGTGGAGA	00
gen_833	TCCATTTTGTAAAATTATGTGCGTCTAAAGTGCATTTTGCTGGCGTTTGGTTGCTACAATGTCGAAAAGTGTTGTAATGG	00
gen_834	AGGCCTGTGTACTGTCACGTCGACGTCAACGAAACTACATTAACTGTGATTGCTATCGGTTCCTCATAATTCGAATCCTA	00
gen_835	TCTTTCACTAACAACCTCCTGTTCATAGTCAGCTAGGTATGCTATCGTACATATACAATCATTAGTGGTATATGGGGTTA	00
gen_836	GTTAATTAATATGGATCAAGCTTCATGCTTAAATTTGTTTGATATCGATACTAAGATTAAGTGTGGATCGTCTCCGTAGG	00
gen_837	TCGTAGTCTCCTATCTTGAGGGTCGTCAATGCTGTCAGTTCTATAGCTCTCGAATCCTTCACTGTCGAGTTGGCGCATTT	00
gen_838	TACGTGGGCTTGATCGCACACAATGTCTTACGGTTTACAACAGACAAGTGCAGATTTGTCACTTGGACCACATCGCCTTT	00
gen_839	TAAAGTTGTGTGGTAGGTATATGGTAAGTGAAATTGGTAAATCATAGAATCATGGGCCGGTCATGCGACCACACCGGTAT	00
gen_840	TGGTTCTATTATTGTCACTGATTTATGGATTCAAGAACTCACTTTCTTACTTCCGCGTTGAAGAGATACTTCATAGTTAT	00
gen_841	ACTATCCTGTGAAACTATTGAGGTGCATCTAGTCATGTACGTTATTCCACATGAGTTCGCGTCTTTTGTGGCTCTGTCAA	00
gen_842	ACCATAGCTAACCTTCTGAACCATTAATTGGGATAGTGGTGTCTGAAGTTAATATACGGTGGCGCTCATCTTCAAGCCAA	00
gen_843	TAGGTGGAGGAATATATTGTTACCTATCAAGTACCGTACCTGGTTCGCTGTAAACTAAAGGTCATGACCTTAAAGATCTC	00
gen_844	CGGGCCTTAAGCTGTACCGTCTGTCCACGACAAAGTTAACCTCTAATCGGTTGGGTCGTAATCCCTATCGTTGCGTTTTG	00
gen_845	ACGGTTATAAGGCTCGTATTTGATTGCATTGTTTGTCCATAAGGTCGATCACTATTTAGCGGATTCAGAGATACAAGTGA	00
gen_846	GATATATGCTAGTACTGTTAGTGTGCTTATAATTGCATCTTTGACGTAGTATAGTAAAAAATGGTCGTCTGCACATGTTT	00
gen_847	TGCGGTGGACAATTCATTGCTTTGCAGGCAGGGTGGTCTGGAATTGCTTACATGTGTCAGCTCCCCTTCGACGCAGGCTT	00
gen_848	GTATCATCTATCGCTGTTGCGTTCTTGCTTGTATTGGTGGCCGTGATCCAGGCATTGGAGGATCTACCTTCATAAGAATA	00
gen_849	CTTTGCGTGGTAGCTATAAACAATCTGGTGGTTAAGCATATCCTTCATAGAGGTGCGGGGCATGTCCTTGAGTGCTGAGA	00
gen_850	ATGTTGATCTATGAGTATGGGGTGAACGGATAGGTACTTGGGGGTCCATACTTCAATGCCCTCGGCATTGTATGCCTTGA	00
gen_851	TTATAGTTTCTCTGAAAGGAGTACTGTGTTCCCTGGTAGGTCATGAGTTTATCTGATCTCAATTTTCTTAGCTGATGCCT	00
gen_852	CCTGGTTAAGTGTTTATCGTCTCAGACAAGACAGCAGAGTGATAGAGAAGAGCTATGGGCACAGGGGAGATTTGCAGGGT	00
gen_853	AATTCGACCAGTGCTTACTTTCCCTCGACATCTTAGCTCTACTTTCTGTAACACTTCTCTAGGACTGAGTCGCGGCTAAT	00
gen_854	GGAGACGTCAGGACCAGGGGTGTGTAAACTAGAGACTTTGGTGTGGTGGTCCAGAGATGATGACTCGACGAGGGTAGGCT	00
gen_855	CGTGTCACTTCTAGTGTAACAGTTAGTTCTTGCATTGACTAGTCGCATGAATATTCGGGACCCTGTAGGGCAAGTCCTTC	00
gen_856	CATCTAATGTTTTTATGATTTGGGCAGTCCAGTTATCACGAGGTATGGTAAGTTACATGGGCGCGATTACTAACTATGCA	00
gen_857	TACTGCTAGGCGATCATAGAGCCAATGAAGTTGATTTATTAAGCCCGTTCATGTGGCTGGCGACATCGTCAGCTTGTCAA	00
gen_858	GTAGAGATGGCGATACCTCTCGAGTGAGGAGCGTTCCAACTAGGTGGTAGCGTGGTTACCGGGTCAGACGACGATAGATT	00
gen_859	GACTATCGTTCGACTCGTCTTGCTGCGAGTAGTCATATGGTGATCTTTATTCCGGTAAACAATTAGCTTAGACGTTGATT	00
gen_860	CGTTGGGCAAACCATGTGGCGATATCTGTTACGACGTATCCGGCGTTCAGAGTACAGGTTAAGAGTGATCACCTGGCCAA	00
gen_861	TTCTTTTAAGCGGATCTGGTAAGCTTGCAATAGAATCTCTAGATGATGTGGTCCTTGGCCGCAGTGGGCCGTCCTTGTAT	00
gen_862	TTGAAACGTTAAATTAGCCTACGAAGTTATTAATTTGTTTAGGGTGGTGTCTTGCCAGACTTTAGTATGCGAGGCTGTGT	00
gen_863	TTATCGGCTAGTTCAGCGTAGATTTCTCCTGTGTTGACCTGGTTTCCTAAAGTCAACTGGTGTTTTTATTTTGATGGGAT	00
gen_864	ATAAATAGGCTTGTTCATAGTGTGGTCTTGGGGTAAGGTGCATGGAATTGTGCTATTCTTGTTCTTCCAGGTTCTGCTGT	00
gen_865	GTCGGGTGGGTCCATTAGAATGTTAAGTGTACTTTCATAGCATTCTTTATGTTGTCCAGTTTAGGCCTAAACCCCGGTCA	00
gen_866	TCATTGTGGCACCTAGGTTGGACTAATGTTGCTGCAATTGTGGGTGGGGCTACCTGGGCGCCCGTGGGGATTTCTTATTA	00
gen_867	GGATTGGGCTGTTATAAGGTTAAGGGTTGAGCTATTTAAACTCGATCGTCTTTCGGTTGGTATCGTAGCGTAGGAGCTGA	00
gen_868	TACTAGTGTAGGTATTGCCACTGTTATGCACACTTTTCTGTAGGCCTCCAGATATTTTAATACTTAGGTGGCTACACGTT	00
gen_869	TGTTTGCGAGTGGGATCTTCTATGCCATGATCTTTAGTCTTGTAAATGAGTAACTAGCTTCGGGCCTCGTATGCTTTTGA	00
gen_870	GTTACATCTGCTAGATGTATTTTCATTGAATTATTGGTCGGGGGATTGAATTAAGTATCCATGGTGTTATGGGACTACGT	00
gen_871	ATTCATATTCTAGCGCTATGTTCATTAGATAGGATGTCGCCGATCATTCAAGCACACAGAGGGCAAGTAGGGCTATCGGA	00
gen_872	GAAATTGCGAGACCTTTGACAACCTTGGGTAAGTTCGAGGCTTGTCTCGATCAAGTCTACTGAGTATCCCTAGACCTTTC	00
gen_873	CTGTTTTATGGGATATTTAATAATTATGTTAGTGTGCCTTGGGGTGTGTTACGTTTTAATGTGTATTGCCACGGGGTGTA	00
gen_874	GAAGAGGTGGTCGTTGTGAGAAATGGGCCATACGGAACTACTGCTTGGGTGGTAGCCTGGCTGTCCAAGCGCCATAGCGA	00
gen_875	TCTGCGGTATGCCCTCAAAACCAATAGAGGTGTGGGGTGCCTCATAGGGATTGAGAAGAGGTGGTGTGTTGAACTAGTGC	00
gen_876	TTACTTGCTGGGGGAAGAAAGTGCGGTGGTGTAGAGTAGGTTACGGTGATGGGGATCGGCGGTTAGGGTCGAGTGTCCTG	00
gen_877	TCTTCCCGACAGAGAGTGTAATGTTTCGTTACACTGGTCTGACGACCTGTCCATATATTAGAAGATGGTCTCGCTTCATA	00
gen_878	TCAGTGGGTTAGGAATCGCTGAAGGAAAGGGTCCTGCATTACCGGTAAATTTTGGATAATGTGTTGGAGACTGGCACGCA	00
gen_879	TGCTACTTTCATTGTGGAGAGATATTGAGAAATCTTCAATCCGGAACGTCACGTTATTTTATCAGGGTTTGTTGTGGTCA	00
gen_880	CAAACGATTGAGCTCAGGGTTTTCTACCCTAGAGTAATGCTTAGATAGCAAGTAGAATGGGCATCGGTCATGCACGTGGC	00
gen_881	AGAATTGAGGATTAGGAAGTGACTAGTACGCACTCTTTAGGTCCTGCAGGTTTAGTGACTGGAGAGCGGCCGTGGGTTTC	00
gen_882	GATTGTAGGAGACTCCAATCAATTGGTTGTTTTGAGCAGTCGCCACATCGAACAGTGGGGGATCGCCGCCAATTCGTTGA	00
gen_883	AATGGTGGTTGTATGGAAACGGGTGTTATGTAGTGTCGGATCGTAATATAGTCACTGCAGTCGGGAAGTTGGGCAGTGGA	00
gen_884	ATGGGCTTGATTCTTTTGACTAGCAAGCTTTTTATATGGTTAATTATGTGTTCTGTTCCTGGTTGGCTGGTGGTCTCATC	00
gen_885	ATTCATTTCCAGTTATGGGTAGGGTATATTGTACATATCCAACGATATTTAATAGCCTAGGACCTTCTACGACATATCGA	00
gen_886	CAGGAGGCTCTTTCGAATCAGACCTCCATTGGACCCTTTCGACATTACAAATGTGAGTCACCAAGCCTACCAGGGTGCTG	00
gen_887	TAGAAATAGACTGCCATATTCACCTGTTTATTAGAAATTTGCGTCCAAAAGTACTCTTGAATCCATTCGTCGCACATATT	00
gen_888	CTCACTTGAGAATGGATGTTCTATGAATGGGTTTGATTGACGCAGACTCGGGTGTTGTTGTGGTATGTCCTATGCGGAGA	00
gen_889	AAAAGGATCCCGGAATTATAGGAGCTTAGAGGTTAAGCTTGGGTGGGCTCGTCAGGTAGATGGCGCCGCTGGTGGCGTGA	00
gen_890	AAGCATTTGTGGCATAAATACAATGAGTAATGATGCAGCTGTGTGTTGGCAGGTTGGTTACAGGCTGATTTGGGGCCCAT	00
gen_891	ATAGTGAGAATGAGGTAGCAACTAGGAAATGTGCCAGTGAAGTGATTTGTACTTGAGATTTTGCGGTGGTATTTCATCAT	00
gen_892	TGTATAAGGTTAATGATGACGAAATCTCAGTGTTTGGATCCAGAGGTGTTGCTGATTATGAGGCTGGGCACGGCCTACCT	00
gen_893	TTTGTAGTTATTTGGCGTAGTATATTGAGATAGTTCACTCATCGTCTTATTTATGGATCAGTGCAATTAAGTGCTATTGT	00
gen_894	TGTAAACGTGGAGTGAACATGGGCACCACACATGGAACTTTTCTGGGTGACCTGGAAAGCTATTCCTCAACAGTACCACA	00
gen_895	TTGTTTGCCAGATCACCAATTGGCTTGAATAGCGGCTGGTTTGTGTTACATTTCGTCTCAATGGATACTAATGTTAGAAT	00
gen_896	TCTTCACACAGGATGGTTTGCTCACCAACTGTTTCCGATCTTTGTTGGCCCCAAGGCTCCGTTGGTTAGTATAGGCATCA	00
gen_897	GAATGTTAAAACTGTGGATGGGATTTTTATTTATTTGATGTGCTTGCGACATTGGGCTGGGGGGACTTACTAACCGACTA	00
gen_898	TTTGCTCGCATATGAGATCAGAAATTGGGCCAGCTGTGTGTCGAGCTGTATGCCTACTTTCGATAGAGAATAGGAAGTGT	00
gen_899	TAGTCCTGTCAGGTATGAAACTTACGTTGCTGGAACTCGTCAGGATGGAATAATACCCCTTCGCGTTGGTAGTTCTGTCA	00
gen_900	GTTTGCAAACTTCCAACCTATACGAATTCAAGTCGACTGGTGAGAACATTTCAGAGCCGAGCTAATGTCCTGTCCAAGTA	00
gen_901	TGTTGCGATCAGTTTTGAATCATATGAATTAGTCATCTTTACTGTCACGACGTAGTCATCAGGACCTCTGCTGCGGAAGA	00
gen_902	TTTGGCATTGTTTTAGGGGCATAGTGAGATTGGACCCTAGAGGTGGAACGTGGGGCTGGGCGGTTGTGCGGCTGCTTCGA	00
gen_903	GTTTCTTAACCAGATCTAAGCAAGTATACACTGTTTACTATTCCGTGATATCTCTTAGTTGGCACATGTACCGCTCCACC	00
gen_904	GTTGTACCTAACCTGTCTGCCATCCAGTGATGGTAATGTCGAATTGATATTAACTTGTATACGACCCTGAGTCGGTAATC	00
gen_905	TACTATTAGCAGTAAGTTGTGTAGCCCGCTATTCACCATTGATCAAAGTTCGGGTGGAGGTAAGACTGGAGGAATACTCT	00
gen_906	TCTCTCATGTTAACATTTGGTGTCTTGATCTCGATGTATGGTTATCATCACCGATCTGTAAACGATTGAATAGGTACTCT	00
gen_907	ATTTAGTGGAGCTTTATTCGTAAGCTCCATTTGTTAATTTAGGTTGGTATTTAGTGGAAATGATTCTAACTAAAATATCA	00
gen_908	AAAATAGTAAGTTGGACTACTTGTCTCGTACGTTGGAGATCTGGTTCTTGAAACATCCGCGAGGCTTATATTTTCAATTT	00
gen_909	CTTGAGGGCCATTTAAATGCCAACCAGCTTATGTTGTAACGGTGACATTAGGAATCTCTGTACCCAAAGATGCTCCCAGT	00
gen_910	TGTTTGTTCGAGTAGATAATATTATCAGTAATCCAGGGAATTGGGACAGGGGCTAGGCATCCAGCAATATGGGTTTCCAC	00
gen_911	CTCTCTCAGTGGTATACATGTCTGGACTACGGTGGATAAATCCGGGACCTGGCCACTGCCTTCGTCATGCAGAGGAGTTA	00
gen_912	TGGCCCCCCAGGTTGTGCCTAATATATTAATACGGTCTTCAACAGGGTCCCAACAACCTAGGGATAAGTATTAATGTTGC	00
gen_913	CGAAGGAGTAGTTCAATACGTGGAAGCTATATTAGACCAAATCTTAGGTGATGCTTTCATGTCGGGTTGCTCTAGAGGGA	00
gen_914	TAACAAGATCGTTTTCTTTGGTAGTACAGAATGGACTATGTATTTTGTCTCCGTATTAGTCATATATGGTCGGTTAATTA	00
gen_915	TAGACATAGGGGTTAGCTGGACTTGTCGCTGGTGATTTCATAGGATAACGAACATAGCATCTGCGAGGCGTGTGAACCTG	00
gen_916	TCATAATTTGAGTGTAGCAAGGAGTAACGAGGTTATGCCATTAAGCCAACGAAACCTTACAAGGGGATGGTATTCTGGGA	00
gen_917	GGATCTGTTGTATAGTTTCTATGTTCGTACCAAGGATGTGAGGTTTGTGATGTGCGCCATGTTCGTCAAACTTGTGTATC	00
gen_918	CGAGGGATAATTGGTACTGAATGTGTAAACTCTATCTTAAACGGGTTTATACTCCATGTAGTTTCTAGTGTACCTGCAGG	00
gen_919	TAAGTTCGGGTTGATAGTGTATCCCTTCAAGTAATATAGAGCAGAGGGGGTTTCTGATCAATGTCAAGTTTGTAGTTTGC	00
gen_920	TTTAGAAGGACGAGTGTACTGGCTTGGGCGGTGGTGCGACTAAAGGTCCTGCACCGACCTCGGTTCTTGGCCAAGGGTTT	00
gen_921	GTCTGCATAGGAGGCTTGTTAAAGAGAACACGCATTTATAGTGTGTATCGCAAACTAATGATCAGTCGGATTAGTGTCAA	00
gen_922	TCCATCTACAATAGTCACGAAGGTTGGGATGGTCGGTTAGCCACGCTTACGTGAGCCACGTACTAGTATTCGGGAGGTTG	00
gen_923	TTGTGTATCGGTACCTCAGACGTCGTTTGCCTCATTTTAAGACCATTTCGTGTTTGTACTAAGACGGTGTCTGCCCGGCA	00
gen_924	TCCATTCACTATTCTTAATGGTTCACTATAGATACGGGACGCTACATACCTGTGTTGGTATCAAGCGTGTCATGGCTTTC	00
gen_925	GAATCTGAGTAAGTGTGTAAAGGCTATGGGAGCACCGTACATTGGGGCCCTGTAGGACTCGAGGCCGGTTCGTGTAAAGC	00
gen_926	CATACAGCTTCTGATCTATCATCGTTCGTTTAATTCATTATAATGTCATCTGTGTCGGTGCATTCACCTTTCTTTTAAGG	00
gen_927	CGGTAACTCTTTGATTGTAAGCTGAATATAGACGATCTACGTAGAATACAGAACGAGGCCAGCGAGGGTCTTGTGTGCGA	00
gen_928	TTCAGTAGCTATGCGTGAACTTCAACTTCAAATGTCTGTCCCAGGAGATGTGGGGGTTATCTTTCTTGCGGTCAAATTTG	00
gen_929	AACCAGTAATCCGTGTGAACTTTCGAGGAGTTAATCGTGGCATACCTACGTAATGTTTCCGACGGTTACTAATCGTGGTA	00
gen_930	GAGGACGAAATTTAAGCATTGTGACATCTCGTAACAACAAGTAGATCATTCACCGGGGATATAAGGAGGCGGGTGTGTGT	00
gen_931	TCGTTTAGTCTTTTAAATGGTGGTGATGTTTCGTGTTAAAGTCTCTGAGGTCCTGGATCCATGTCCCAGGCTTTGGTTGA	00
gen_932	TCATTAGGTTCGAGAGTTAAGCGATTCTTCGTCTGTGAGGCGTCTCTCCTTTAGTTAAATGGCGTATGTAGTTAATGAAC	00
gen_933	TGCTAACACAATTTTTACTTAAATGGGGTTAAGGACGTGTATGATACTGCCAAAAGAATTCCACTATGGTTGTTTAAAGT	00
gen_934	GGTTTCTAGCATTGTCTCTTTGCAAATAACTGATATTAGCGGTGCTTACTATGCTTACAGATCCAGGTTGACTTTTCTGA	00
gen_935	TTATGGCGGCAGAAGCATCACGAACAGCTATTGAGTCTGATTTGATCAAACTTTATTAAGTATCGTTATTGGGATGGGGT	00
gen_936	CATATCTTTCAATATCCATACTGCATTTATAACCGTCGCTCAATTGATGTAATGGGTATCTCACAGGGGATTCTAGCAAC	00
gen_937	CATTAGGCCAGTTTAAGCATATTCCCGAGTGCAGATTACACTTTGGGTTATGCGATAGCGGGTACTGCTGCTGTCACCGA	00
gen_938	ACAGACGGTCGTTGTTTATAGGGTCGGTCATATCTAGGCTATTCAAACCGGAAAGAGGGTATATCTTTTCTTATTACCTA	00
gen_939	ATTGATTTGGCCATACGTTGGAATTAATGATAGAGCTATCCCTCTTATACCTCTTGGATTATTTACAGGGTAGGCTGATT	00
gen_940	AGTTATAGGATCACGAGCTCATCGCGATAGAGACGGCTACCTGGCATTCTTGGTTTGCGGTGTCGATACCTTAATGCTAC	00
gen_941	AAATCTGTATTCCCCGTAGGCTCCTCAAGTAAAGTTGTTGGTGTGCGGTGCTTCCCTACAGGAGATGAACTTAGTTATAT	00
gen_942	ATAGTGGGGTTCTTTATAGCGACTTCTAACATGATTGGCGGACTTGGATGTGCTTTTAAGGTTGTAAGTGTCTAGGGCTT	00
gen_943	GTGAAGGGAGTTGGACGATTGTAGTAATGGCCGCAATTGAAAGGATATAGGATGCATGTGGTCGTATTTGCGGTCGTGTA	00
gen_944	TGTTTTTATTGGTTTGCTGCTGCAAGATGAGATTGGAAGTTAATGTCGGTACGGGAATAGATAACCATGATCACGACTGG	00
gen_945	CGTCAATTTCGTGGAAAGCAAGGGCTAGGCTTTATACGATCATTATGTAGGGCGGTTGACTAGGTGTATACAAGTCGCCT	00
gen_946	CCCAGGCCATCACCTAACGGGCTTGTCAGTAGGGCCTGTAAGATCGCTATTGGAGGGCAGGTGGTAAGGACGTCTTGTGA	00
gen_947	TGTTGAGGTCTGCTGGGGACTGCTCGAATAAGCATATTAGCGCAGAGTGAATACCGCATACTAGCCCAGACAATTTGAGA	00
gen_948	GTCTGTTCAAGCAATTACTCTGTATCATTTGTTATTCTGGCAGATGTAATGTTTTCGGGATGCCTCAACTTGGGCGTGAT	00
gen_949	TATCCTTGTCTCCTATTTCTGTCAGGTTCATCAATCCGCCTGGATACGAGCCTGGAACCCCCTAGTCCCCTGTTACGTCT	00
gen_950	TTTCTGAGGTAGTGTTGTCGATGTTGGCAGGTCGGTTCAGCGGCTAATTGCTCGCCACCAGATATGACTGAGGGCTAGAA	00
gen_951	CGACTGTCTTTACCTCTGAACCTAATAACGTAGTTGTGTCTCGAACCAAGTGTAGCTCATTTCTGACTCTAACTTGATCT	00
gen_952	AGATAGAGAAGGTGACATTGCTTGTATGTCTGCATGTCTGTTTAGAGGGTATTACCGGATAGAGATCATTTTCTTTCTGA	00
gen_953	TAATCATTCGAGAATTCCTAGTTCGATCTGCTTGGGTGTGGAGTGAAAGGTGCCCCAAGCTCATGATGTTTGAGTACGGT	00
gen_954	CTATGAGTTCTGGTACGATTATTATCGGAGATTTTGGCAATCAGGTTACACTGTTTAGTTACAAACGTTCAGCGATTTTA	00
gen_955	TTTGTCGTTCATGTCTTGTAAGATCAGAGAGTTCCTTTGCTTCACGAGCACTCATTTTCGGAATTGGCAATGAATTGCAT	00
gen_956	ATTAGCAGACCAAGTGGCGAGGCTTAAAAGTAATTATGTGTGTTTCTTTTGGAACTTTGGGATGGTATCATCGGGAGATT	00
gen_957	GTGGTGTAGAAAGGCATCCAAGTGTTCTGATGCCCCTGGCCTTTGTGCTGTATTGTAAGAGGTACTGTAGCCTCTAGTAA	00
gen_958	TGTTAACTAATCATTGTTTGTAACATGGTTTGCGGTAAGCAGGGTCGCTGTGTCCTTTTTGGTTTACCATTACGCCTCCA	00
gen_959	GATGTTGTTGAAATGTGTCTAGTTTAAGCGTATCGTGGCGCCCCTTCTAAATTGCGTCCTATTAAATGAACCAGCAGGCT	00
gen_960	GATTATGCATTTGGTCTACGTTTCCACTAGTATGCATATTGCATTGTATGCAGTGTGATTGTCTTGCAAAATTACCTTCT	00
gen_961	TGCTTCGAGTTTTACATCATGAATAGGGCTCTAAGGTTGGCACTTTGTCAGGCAGGGCAGATTCACGTATTGTGCGCTAC	00
gen_962	TTATCATACCTGTAGTCTTAACATGAAATTGTAGCTGTGGAGACGCTAGCCCAAATCCCCGGAGACAACACTTAACTCGA	00
gen_963	ATTCAATGTATCGGTTTCAGTTGCGAAGTCTTAAGAGATACCCTCAACTCCAGTGGTTAATTATGTCCCTAATGCCGGGA	00
gen_964	CGAGTTATCAATAGTTAGGGCTGTCATGCAAAGTTTATCGTTTATCAAAAACCTTGGAGGCATAACACTAATCTATGAGA	00
gen_965	TCGCAATGGGATGAAAGGTGGGCCAAAGTGAGTGTTCTGCATCAGTGTGGTTGATAAGAATGGGGGCGCCCCGGTTAGTT	00
gen_966	ATCATGTTACTAAAAAATCATGTCAATCCTGTCACAGTGCCATTGTTTGTTTGTCCTTGAAAATGTCCCCTTTGCGTAGA	00
gen_967	GATAGATAGAACTAGAGATAATCGTCCAAGCTTATCGATAAGCGTGCGACTCGATGCTGCGCCTGAACATGGATATTGTA	00
gen_968	TAAGACTACTTTGTGGGGGCGTGGGGCTGTTAAGCTGGGCTAGATGAGGTCATGGACATGTATGTCTCCAACATTTATAG	00
gen_969	TTCACAGGGTTTTGGCGTGCGTAAGAACGTTTGATCCCTCAGTACTCTGGGCCAACGACTTGACACGAGATAGGATAAGA	00
gen_970	TTAAATGAAGGTGGAGGTATCATGTGAAGGCATTACCGACTTGAAGGTGTGTCGGATTTGGCGGTTTAAATATGGGCTGA	00
gen_971	TAATATTATCTCGGTTTCTTAGTTAGTTGTTATCTTGTGTGAGTGTTTATAGGAGGTAAGCATACTTGACGGGTGATGCT	00
gen_972	CTCACACAACGGTTATATAGCGTAGCGGGTTGTAACAAGACTTTCTTGTGGGATTGCCCCTCATATGATGCCTACTCGGA	00
gen_973	TGGAACAATCCTGAAGGATTGAGTCAGGTTACAGCATGATGAACGCGGCTACCGACTTGGGGGTGATCGGTGGCTAATGT	00
gen_974	TGTACTTAGATATCGACTTTGGCTTTACGTCGCTTTTCTTTAGTCATATAAGAAGTTTAGTCGGCTAGGAACGTGATAAT	00
gen_975	TGACACTCGTACGTTGATATGCGTTGAGGTGACCTTATTCGGGGCAGTGTTTATACCTCTAGATATCACGTAACGAACTT	00
gen_976	AGATCGGGATTCTTATAAAGAGATTAGCAACAGTTGGGAGAAGTGTCCCAATGAGAATAAGCTGGGTAGCGACCCGCTTT	00
gen_977	GTTGGAGTAATGTGTCTTAGCTAGCATATAGCTATGTGTGTAGTGTGAGTGCTGGTTGCTGCGGCAGGCAGTAGATAAGG	00
gen_978	TCATAATGATTGGTAGTTGAATGATTAGTCCCGTTTGGCCTGGCGTTCCGATAGTTAGCGGGGTCTGCAGAATCATCTAT	00
gen_979	GGAAGGTCAGTAAAGCTTAGGTACCACGTTAAACTTGCTCGAGCTATAGTTTTTAATCCATTATTCTTCATCCCAGATTG	00
gen_980	TGCACTTAGTGAAGGCCTCGAGAAAAGTATGACTAGGTCGATCGTCTTGGGTCCTGGATCGATGAGTCGGGCAAGGCTTC	00
gen_981	ATTTAGTGCTTTATTATTTAAAACATCATGATGATATTGCTGTTAACATGGGGGACGCACGTCACTGCCAGGTGGCGATA	00
gen_982	CAATGTTGGTGGTCGCTGGTCATAAAGCAAGAAGGCTTTTGTGTCTGGTCAAGGTCGTGCCCTCATAACTCGTGACACTT	00
gen_983	AGAACAAGCTGTACGTTATGCTCTGCATTACACGCTCGTTACCAAGTTATTGGTGTGTTCGTTTCATACAGTGAAATTGA	00
gen_984	TTATGGTGCTTTGGGCAGTTCCATATGATGTCCTTTGCTACTCATATGGGGATCTAATCCGATTATCAGGTAAAACACTT	00
gen_985	CAATTTAAAACTCGTAATCGTCGATTCCTCCCGATTTACAACGTATAAAGTACTTAATTAGTCCATACGTCTGGAGCTGT	00
gen_986	TCCTTTAGGGATCTCAGTGCAAAATGGTTTTGTGATCTGTGTAGGGTGGCTGATCAAAGTAGTATGTTGAGTGAAGCGGC	00
gen_987	ATGAGCGGTGACGGTGGTTTGGTTCTTTGTATTTCTTTTGAATTAGGTACGAGGTAGTATATTGGACGTGTTACATATAA	00
gen_988	TCGATGATTGACCTATAGTGTGTGAACAATAGGGTTCGAACTATACTGGGTGTAAATTTGTTCTCAGTACAGTTCGCTCA	00
gen_989	CACGTTATAAAGCACGAGTGTCGAAACTAACGTTTATTGGCGATTAGTGGTTTAGTATACGGCCTCGTGGGTGTTCCTCA	00
gen_990	TTCACGGGAGAATCCAATAGCTAATATGGTAATTGTTGCGAGACTCATCCATGAGGCTAGGGAGTTGCGTCGAGTCCATG	00
gen_991	ATTTTATAAAGCACAAGGTATGATCGATTCTAAATCTTATTTAATATAAAGCTATTACGATGCAGGTAGTCCATCCTGTG	00
gen_992	ATTGGACGTAACATATCGGATTCTGATATCGGATATGTTAATTTAGCCCTCTTAACCATAACTCTGGGTGCGTTGTCTAC	00
gen_993	AATTAGGCTCTTTCCAATTTCTTATCTTCGAGTATCTGTTCTATATTGACGAGATCTCCGGGCTATGCATATTGGATTAA	00
gen_994	GTTTCAGGTTATTGGATGTTTAGGTGGGTTGGTATTGTTGAAGAGGAACCATGGCTATGCCCTTGCCAAGGGGGCCTCGT	00
gen_995	CTTGATGCCTTTGGAGAACCCCGGCTGACGAGGTCATGGGTATTGAGTGGGTCGACGAAGTGTACCATGCCAGCTATTGT	00
gen_996	CTAAATGATGAAATGGGTTAATGTGAAGCTGAATCCTATTGAGCCTGGGTGGACGGGCCCGGTATGCCACAAATCTTGAG	00
gen_997	TGATCGTCGCATAGGCCTGCCTTGTGACGATGGAGGATGTGTGTAGCTCTCAGGGACTTGCGGTTGGGTCGTCGTTCAAG	00
gen_998	TTTGATCGTCTCTTGGGATGTCGTCACTAAGCTAGGTTAAGGATCAATGTGGCTTGTTGTAACGTCCAAGGGCTCTTTGC	00
gen_999	CCTTATGGTGGTTAGACTGGTCCGGCTGGTTCGAGTATCCAGGAGACTTAGACATTGGGCCTTGTTTGCTACGTGAGGTG	00
gen_1000	GTCGGCCTTTATCTAGACAGGTCAAGTCATAATAAATTTGGGTAAGGAAATTAATAGCTTGGTATTATCTTGAAGGGCTG	11
gen_1001	AAATAGAATGGGACGTTTCCACAGTGGGAGGGTCTCCCCTAAGCGCTGTTCGCTAAACTCAACGGCCAATTTTGCCCATA	11
gen_1002	TTTGAGAGATGATGCCGGTCGCAACTGTTTATGATATCTACGTTTGTGATACGTCCTTTAGATATTATAGTACCGTCGGG	11
gen_1003	GATAAACGAAGTCGTTGGGTAGTCCTGTATGACCTCTTCATGATATATGGTAGAAATTAACGCCCGGAGGTTTTTCCAGA	11
gen_1004	TAATGGGGAACTTCATAGCATTGACCATTTTAGTGTATTTGAACACTGCGTTATCACCGAAGGCGGTCTATCGGGGAATC	11
gen_1005	TGCGAATGTTTAGTAGCTAACAGCTTAGCGCGTGCAAGCACATTGCCTTAGTTTCTAATAGTCTGTGATCGGTCATCTGA	11
gen_1006	GGGATGAGGCAATCGCCTCATGGTTTGCTTCTTAATAGGACCGTCAGTTTTCATAAGGTAATGTAGGTCTGACACTTAGA	11
gen_1007	ATCATGATGTGCGGCTAACCTTATGCAGTACTATGTTCCGCCCATTTGCGTAGGTGAGTTTGCAGCGTGCCAGTGTTTGC	11
gen_1008	GAAAGGAACTGCCTTAATTAATAGCGGCGCATTAGCCTTGTTATCACATTCAGGTTTGCCGCGTGAGGCTGATCGGTCCA	11
gen_1009	CCTCTGGGAGTCCGATAGTTTACACAGCTAGTTCTGCGGTCGTTAGTAGCGCTGGGGTGTTTAACCTACCCCATTAGGGC	11
gen_1010	CTCAAGATTGTGATAGTTGTTCGCGTCAACATGTCCTCAAGTGGCTATGTAGGAGCGCTCGTGCTTGCGTAATTCGGTGA	11
gen_1011	ATTTGAGTATTAGTCTGATGCGGACTCGTCACTTCTTCAATCAAGCTAAGTGGCGCGGAGCTTTCGGATCTGATGAACGA	11
gen_1012	TCATTAGTTAAAAGCGCTTAGGATGGGGGGTAATTCTGGAGATATTTAGTGTGATTTACCAATGAATACATAGTATGTAG	11
gen_1013	TGACCGCCTGGGAAGATGCATGGTCGAACTGGTCGAACGGAATAAGTGAAAGTTCGTGAAGGCTGAGGACGTCGTGGCTG	11
gen_1014	ATATTGTGAGAGCCTTTGGCTTAGCGGGCGGCCTTATTCATGAACTTGTTATCGTGAGAGATTGGAAGCAGGTTGTCAGA	11
gen_1015	TTTGGCGGTTATGTTCAGTCCCCGGTAGATGATCCACGAGTTCGAAGAATATCCGTGTCAGGCCGGGGGGGGTTCTTAAT	11
gen_1016	AGAGTTCTTTACCGATCTGGCTGTCACCTGTGCAGAGTTTGGGTACGGCGTACCGAAATCCAGATTTATTTGCACTTTCT	11
gen_1017	AATTAGTACCAGCGTGCATCTACCGATGCAATGTGATTTAGGAGCAAGGCGGAGAGAACGTTGTACTTAGAAGGAAAGGT	11
gen_1018	TGTGCTGGTGAGCTAACGTGGGGACTGGTTCAATTGTGTCTGTTGGTCCAGGGGTGTCCTTTCAAAGGATGGGTCCGGGC	11
gen_1019	TTGTGGGACCCTTTATTTACTTGTGATACGAGCCCATCTTCAGGACAAGCTTTGGGATCAGGCTGCACGGTGGGTGCTCC	11
gen_1020	CAAACTGCGACTCGCCGTTTGCAAGTAGTGTATAGAGTTCATAATTTTGTTCAATACCGCCCGTTCAGGCCAAAGTACGA	11
gen_1021	AATCCGTGTTGGGGTCTCGATCTTTTGCGTGGCCTTTTGAAGATTTAATGGATTTCATGGGCCTAGATGACACTGCCCTA	11
gen_1022	TGTCGTTATAACCACCAAATAGAGCTCGGCGTAAAACGTCACGCTTTTTATGACATTTCAGTGCTGGTTATGGGTAATCT	11
gen_1023	TCGTAGTCGCTGCCTCGCCATAAGCTGTACGAGTATGGCCTTTACGGTCGTGTGTGTGGTAGTTAATGTACGGGGGCGAG	11
gen_1024	TGAACGCAAAACCTTTAGCTAGGTATGGGGGGAGCACCGTGCTATAGGGATATCTAGGCTGGCATGGCGGGGTCCCGGGC	11
gen_1025	TTCAGGAGTATGCGCTTCTAGTCTTATTATCGATTACCTGGGTAGGTCTGTAACATCGTTGTGTTGTAGCGCGGGCTAGA	11
gen_1026	CCTATTTGGATGGCGCCACTGGTCTGCTTTAAGCCACGAGCCAGGTCAGGAGACCGCTGTGGAGGTCATGGTTGCGTCTA	11
gen_1027	AGACTTGGCACGTTTTACAGAATCAGTTTGCATTGTGGAATCCTATTTCAGGGTTTAGTTTGACATGTTTCCGATTCTCG	11
gen_1028	GCAGAGAGGGTCGGAAAGCGATCTTTGGGGTAAGCAACTGGGAGTAATGGATCATTAGGGATAGGAGTCGCCCATAAGGG	11
gen_1029	TCGCTTGGTGAATTCTATTCTAGCTTTATTTTGGGTTGTTTATGGAGTGGAAAGCTTACGCTTGAGAGCCTTTCACACGT	11
gen_1030	TAATAGCGGGTCTCAAAGTGTTTGAGTACGATAATATATCTTTCGGTGCTGTGTTGGGTAGGCCGGAAGGGCTGCGTGCA	11
gen_1031	TACGCAAATTGTCATACTCCAAAGTGGAGATCGGTCTGATTCGGTGTATTTAGTCGTGCGTAGGCTATTTTTGCATAGGC	11
gen_1032	GAACGGTTGCTGGCCATGGACTTATATTTGCCCGTTAAACCTCGCTTGAATGTAGATGACTACACTAGCGGGCATTGGAT	11
gen_1033	TTCCCATATTCGCAACTATGACATGGTGGAAATTGACCTACGTTAAAAACATATTAAACGTTTGGTTCCGGGCGGGATTA	11
gen_1034	TCATTACATGTAGGTCGCAACATTCGGTACTCTTCCGAGCTAACGCTAGCACTAGGGGACCGCAGTTTAACGGGGGGGCA	11
gen_1035	GTTCACAACCTGCATGTCTTGCATTGATGAGCCAAGATTCGGTTGTGCGAAACGATAGGAGAGTCATCAAGGGCCGACGA	11
gen_1036	AGCACTCAGCGCAGGGCTGCGAAAGACGAATAATCGTAACTGGTCTCAGGCAGTTGGGAGCTGTGGATAGTGAAAATGAA	11
gen_1037	ATTGGCAGGTATGCGGCGTTGCGTAAACATGATACAGGGAAAGATGTCGGTTCAATGGCGATTCGATGCGTGTCCAAGGA	11
gen_1038	GAATTGATTCATACAACATTGGTGGTTCCATGTGTTATTTTGTGTGTTTGTGCTTGAGGAGTTTAAGCGCGTTATCGTTT	11
gen_1039	GTGGGCTGCACGTAAGCCTGGATCAGTGTAATTGATCTCAGCAGTGCGTTGATTGCGAGCAGCAGCGCGGGCGGTAATGA	11
gen_1040	TGCTTAAAGAGGTTCGTGCCACGCCTGGTTTCGACTATTGGACCCCGGCGGTCTCGAGGGTCATACTCGACTAATCGCAA	11
gen_1041	ACGACCAAGCGATCTAATCCCTTGGCTAACATGTCGCGATTATCTGAGAGAGAAATTAGATGCATAGCTTGCGTTAAAGG	11
gen_1042	GTTATTTCGTATTTTGGACGTTACCTATGTACCGGGCGGCCCCTTTTGGTTTGTGTCCTGTAACGGCTGATAATGGTCAT	11
gen_1043	AGATAACTCGTGTATAGGTTACCGATCTATTTACCTGTCCAGACACACTAAGTACGCCTTGGGGTCTATACGCTGCGGGG	11
gen_1044	TGAACGTGCAACGGTTGTTGAGGGGATTTTGGGTTTTAAAGCGGACCTTTGCTATGAAGTTATGGATTGGACGGTTCGGA	11
gen_1045	TTGGGGTAACTTTTTGTATGTATGCGTTATGGACCATTTATCTAAGTGACCTAATGGAAAACCGCAAGTGGGGTCCCTCA	11
gen_1046	ACAACACCTCCCGCCATTAGGAAAGTGTACATACTAATTAACGGTTCACCTCAAACGCTTCTTTCCTTTTCAAGTCTATT	11
gen_1047	CTGTCGCGACAATCCGGTCTCCCAATTATTGGCTTTTATGGGATTAGTCGCCACACATTATAATGGACAGAAAGTTGGTA	11
gen_1048	GTCCGCGAATGGTATGTTCACAGCATCCTTGTCTTACGTGGCTCCAGATATTTCTCTTGTCCATCAGAGATATTTACTTA	11
gen_1049	GAATGTTTAATACTGCTAGGTGGTCCATCCTCTTTTTTCGTATCTGGGTTCCGTTGAACTCTGTCTTTGTTGTCTCAATC	11
gen_1050	AGAAGTATTCTCGTGCTTGATCTGTCCGGCATTATAAACAGTTAGCAAAGGAGGCTGCATGGTCAGACAGTGCCTAGAAA	11
gen_1051	TTATTATCTTCGGTTTACATGAGGTTTTGAACAGTGCGCCGTAGTGTGTAGTCTTACGGTAGATCTACCATTCAGATTAC	11
gen_1052	TAACTGGGTAGAAAAAGGCCGATCTGTTTATAACTTATCAACCGGATGACTCGCTATTCTAGTTAATGCGGGTGTGTGTC	11
gen_1053	TAAACATCTAGGAATTAGGTACAAGAAGTGACTGTCCGTGTTGGATTACATTAACTAGTGTGCGGATAATCGTCGGAAAG	11
gen_1054	ATGATATTCATTGACCTTCGGTATCTTTGTTCCGTTCTCTTCGGGTTAGAAGGTTTGGCATTGGGTAGACACTTTATTAA	11
gen_1055	AGGGTGAGGATTACGCGTACGGATTTGAGTGGTGTCATTACTGAGGTGGTCAAGAACAATCCAGGTGGCTCCTTCGTTGC	11
gen_1056	TTATTACACGTCTTTTGGTCAGGATCTTACTTGGGGTGTGTTGCCGGTTGTAGCGGCAGAGAATGCTCAGCTGTTTTGAG	11
gen_1057	GGTGGCTGCTTAAAAGAATATTTCTGGCCAGCACTTAAGTTTGACGACATGGGTGGAGTAACCACTAGCCGAGCTGGTTG	11
gen_1058	CAAAATATTTATCTATTCGCGTGTTTTTGTGTTCGAGTACACAAGATCCATGGCTATTGCGCCAGAATCACCGTGATTTG	11
gen_1059	CTACATGGTGTAGGCGTACAATTGGGCTTTGCGGTACAGTTGCAGCGTGTGGTGGTGTCGGGTTGAGAGCCAGGTTGCAT	11
gen_1060	TCTGATCGAATGGTGCAGATACAATGCCGGCGTTCAGGCAATCATGATTGGGGCCAGTGGTGTCTCCAGCCGGGGTAAGT	11
gen_1061	ATGGCCAAGAGCATCTGCGCCACGTTAATGTTATCGAACCATGCGCAAAGACACAGTATGCGCTCAAGATGATCGCCCTG	11
gen_1062	CGTAGACCATAACTTTCCATTTAGTTCCCCCACCGGATATTCCATCTGCGTGGGCAAGTTTCTGTCGATAGTGGATAGGA	11
gen_1063	TAGATTCGGGCAATTAAGATTAGTGGGAGTCACTGTGGTAAATGGGGCAGCATCTGGTGTGGCATTTGAATGTTTGGGGG	11
gen_1064	AACCTTCATTAGCTGGTATATTCGAACGGTAGCAATCCAGATTGAGTACGCGCTTTACTAGCCAGAGCTATATATAGGGG	11
gen_1065	TTTGTGACGGATCCATGATATAAGGAAAGGTTGGGATAGGTTAGTGTATGTTCTCGTTATAGGCTATCTCTGTTGTGTAG	11
gen_1066	CTATCGTTAGAAGTAGGTTTAATAATTGTTACGTAGCGCGGCAGGAAATGTGAGCTGGCCACCCTCCCTGGTAGTGGTGC	11
gen_1067	TCTGTGGAGTTTCGATGATCGCAGAGCACGTCGGTTAACGAACATATACTACTATTCAGTTTTGTAGCGCATAGATAAGA	11
gen_1068	AACAAACGCTATGTTCGTCTGTTTCAGACCGACGGATCTTATGGCCATGTGCAGTGTACTGCTGGGATATTGCGTCAGGA	11
gen_1069	GATAGCGCTGTGGATTTTGTGAATTGGTCGTCAAACCGAATGTACTCACATGCGGCTTCTCATCGACAAATCCTTTTGTA	11
gen_1070	GACTGTGGAGTGATCTTCTAGCTCGAGTAGTAGTGCGAAGTATAGCCGCCGGCTTCAAATGCGGACCTGGGGGTTTCGTA	11
gen_1071	CACATGACCGTCGGGGGGTAGGTTAATATTCATGGTCTGGTAGTACTGAGAGAATACAACGGGACCTCCTGGCTGCGGTT	11
gen_1072	TTGAGCTTGGCGTAGCGCTTTTACCTTGAGGACGGTTAAAGGCAGGCGTTTACCATGGAAGATTGCATCTGGTTCTTAGG	11
gen_1073	ATGCCTGCTCCCGATGGGTCGTGACAACGTCTCAGGAATCCAAGTGACTATAATTTGAGCGAAGCGCCCATGTATAACAA	11
gen_1074	GTTCTCATAACTTACGAGCTAGACCCGTTCTTTTAGCGTTTCTTGTACAGAAGCCTTGTTTAGTTTGCTGAGAGTTCTCA	11
gen_1075	AATTGCGTTACTTTTGAATTTGGTGACGGGCATCAATAATTGGAATCAGAAATGAATTTACCTTTAGTACCCGGCGTTTG	11
gen_1076	TCGATGTGTCTAACTAAAACTAAGTATGAATGATACGGCAACTACTAGGCATTAGCCCTTGCTCTCGTGTGCCTCCCCAG	11
gen_1077	TGTCTCCTTCTGGCTTTATGTCACCCTTGGCATTAGGTTTTGTGAGGGTTGGTTGTACACTTAGCGGTACCTTTTGTCTC	11
gen_1078	CACGGTCGTGACACGCTGATGTATTCGCTGCTCTCTCCTGAGGCTCAACTGTAACAGGGCAATCAGCCCTCGGAGATGGC	11
gen_1079	ATCAAGTTGCTTTGGTGGATCGGGTCTCAGGGTGTGGAAAGCTATGAAACCTGCCAGCCCCCGGCATAGGCTGTCGGAAT	11
gen_1080	AACCCTGATAGTGATTGCACGGGGGTGCTGAAGGTTGTGGAGAGTTCAATGTGACTACCCGCGAAAGGTTCTGGAAGGGA	11
gen_1081	CTTTGTGGTACTGAATATCTTGTGCTTAATTTCTTTAGTGTGTGCTTGCGGAGGACTGAGGTTCGTTCATAACGCTATAA	11
gen_1082	GCGTATGGGACGTGTAGTCGGTTACATGTTAAGTAATAGGGATATGTTCGCTTTGGGATCAATAAATCTGTGGCTCTACC	11
gen_1083	GTGGTTAGGCATTATAATTTCTCGGGAGGTGTCAGTTGTTTCTGAATTGTGTACACATCACAAAGTTATGGCATATCTAT	11
gen_1084	ACTGACAGACAACCTTAGATCATTTCGAGAGTTAGAGACACGTCCCGACTGGAGGGCGTTGCTATAGCAGGGTGCCTCAG	11
gen_1085	GTTAGGTTCTTGTTGATCGTCGGTCTGTATTGCATAAAGTCATTATGTATAGTATGTAAGGTGGCTGAGCCGCCATCGTA	11
gen_1086	GCAAGTAGGCTCAAAATGAAACGTGTGGCATATCCAGATTGGAGGAGCGATGCGGAAAGGAGGCATGAGGATGTGCTGCT	11
gen_1087	GATTTGAAGATCTTTTCTTAGTGCTGCTATGCTTTGCGTCCCGCAGCTTGTGGGGTTGCGTGCAACGGGCCTGGCTTCGA	11
gen_1088	TGAGATCCTTTATGTCAGCGGTCATTGAGTTATGTTCAGCCATCTTTAGCACGGTGCGGGCCCACACACGTTCTACGTGT	11
gen_1089	TGTTTAGGTTTTTGGGGTCGCATCGCTTTTTTGGGGAATTGTATGAATTGTATCCCCTCCTGTTGAGCTGAATTAGCGCA	11
gen_1090	GTATGTGTTCTTTACTTCAGATTACCGCAGGGTTCCGGGAATTATATTTGTATTGTCCAGGTGCGAATCTCATTTGGATA	11
gen_1091	GACGTGAGAGTGGTGTAGGATGATGTCATGACCCACCATGTCCCGCGAGAATCCTTTTCTTGGATCAGGTACGCAACCGA	11
gen_1092	TATGAATGCCGACGGGAGCTCACGTTGGTATTTAGCGATTATTTATTATTCTTCATACCAGTTGTTTGCGAAGTATTTGC	11
gen_1093	AATTCCGAGGGCTCGCTACGTGCAAGCCTCAGTGTACAATTGAGTGCACTGGTGAAGAGTTAGTCATAGTAAAGGGAGCA	11
gen_1094	TCTACAGGCTCCGATATGTCGCTATTTCCATCAGAGACCACGTCGTCGGGAGGTAATTGTAGACACGTTAGGATCCGTCA	11
gen_1095	TCATCTCACGACTTTAGGTGGATCACAATGAGTTATGGTTGTAGCTGGACTTACCTGTTGGACGTGTGTGATGGCGAACG	11
gen_1096	GATAATGGCTTGAAGCGGGCCTCTTCATGTGCTAGCAGTCTAGATAGGGGAGAGGCCCGGGATACTTATTGGTAGCGAGG	11
gen_1097	TAATGTTTTGTTTACTAGTCTAATACGCAATATCACTGCGTGATCCAGTGTTTCACACGAGGTTAAGGTACCGGTCTGAG	11
gen_1098	CGCCAGTTTACAATATTCCCTCCACTGCGAGTGCCAATTACACGCTTGGTAGTTTGCAAACAATATAGTGGTTTCCGCGA	11
gen_1099	GCGAAGGATGCAATTTGTGATATGTTTTATTTAGAGCGGTCATGACATGGACGGTACGTTGGTCAGAAGTTCATCGAATA	11
gen_1100	CTATCTGGGAGCATTTCGCGACTGTTGATTACAGTGCTTAATGGGGTTTGTCACTGAGGGTACCGTTGACACCTTCCCGA	11
gen_1101	TGCAATCCATCAAGAGTGTAATGCATTGTTTTGTATGTTAGTTACGTTTCAGCGACTCGTAAAGTCTGTAGACCGCGGGG	11
gen_1102	CAGTCAATTTGTGTTAGAACTTGCCCTTGTTTAATTTGCATTTTGTGGAATTGTACCTGGGTTACTCAAGGCGGAGTCCT	11
gen_1103	GGCTGTTTTGGATCGACAACAAAAAAGTCTCCTGTGGTTTGAATCCTCGACGTTAGAAGCAATAAAGCACTCCTTATTAA	11
gen_1104	TCGCCTATCCGAGCTAGTGAAGCCATGGCGGATTCAGGTCGAATAGGTGTCGATCTAACTTGGCTACGTGTTGGCTTAAG	11
gen_1105	GCCCTCCCGAGTCGAATTCTGCTGTACTGTTGTGCAGGACTTTTGTTGGGCAGAATCTGGTGTAATGCAGGCTGTCATTT	11
gen_1106	AGCAAGTTTCGAAAGGAAAATGATGTGACTAGGTAAAGCTATAGTATGGTAGTTGTAATGCTTTGCAACTAGAGCGTGCG	11
gen_1107	TGTCTACGAGTGCTTATAGAGTGTATGTATACGCAGACGCAGATCTTGGATCCGTGCCGTTGCGGTCTCACTAACTCGGT	11
gen_1108	TAAGTTTGTATTTGGTCGTTAGCGTAAACGGGTTATCCTGTTTTGATAACTTTGAAACGATGACGCTAATATTAGCGGTG	11
gen_1109	TGATCGACTCTTCTTTCTATATTGTCACGTTCTAAGTCCGATTAGAGCGTGTATGCATAAGAAATCCTGGTAAGGCGCTA	11
gen_1110	TTTTGCGTTTTTGTGTAGGTTTTCTTGTTCATTAATATGGCCCAGTATAGTAGACGAGATAACTGGGGTATTACTAATCA	11
gen_1111	TGGCTATGTGCCCTGTTGTCAGATTCCCTTCGTAGATAAATCTGTGATGAGAGACGGCTAGTCGCCAACCCGCTATTGTA	11
gen_1112	GTGTAAGGTACTCGGTAGGGGTCTCAAAATTTCTAAATCACGCCCGATCGTAAGTTCTTGTGTAATCAGGTGGACCTGGC	11
gen_1113	AGTACTTGGGACTGCGAAGGTCGTTGTTGCCGAATTGGATTCGGTGCATAGTGATGGTGGTCGGAAATCGAAGTGGGTAC	11
gen_1114	ACTCTATGTGGCACTCTGACTATTAGTATGCATGGATCGGGGAGTGGCTGAGTAAGCGCTCTTGGCCTTTTATGGGGTGC	11
gen_1115	CGTTCCCTAAATGCTGTTATGACTTCCAATGTGGTATAGGTCAAGTTTATCGGCCCCCGTTTTGTTTGCGTTGATGAGTC	11
gen_1116	TTGACCTTACAGTTTATTTGACTATACGGTAGTGGGGCCAGTTGCAGCGCTCTCCGAATAAGTGATCGCTGGTGATGGGG	11
gen_1117	GTCAGTTGGTTATTAAAGCACGGATCATAAGCGGGCTTAGGCCGCAAGTTACGGTTAGGACTCGATGTAGCTACGATGAG	11
gen_1118	TCCTCCGTCTACTTGGGGTTATATGCTGATTTTATAAAAATCTCAGGTAGTGCCTACGAGTAAGATTATAACCTCAACTC	11
gen_1119	CTATCAGAAGTGTCAGCTCGCTTGTTGTGGGTATTTGATTTTGACTATTTTGCTGTGCTGGTCCGCATTCTGTATCCTGT	11
gen_1120	TGGGTCACGTTAGTATCATTCTTATATGGTGATGCTTAAAGTTTGGCAGGACATGTATGCGTCTCTATGGCGCGCTGGAT	11
gen_1121	TTTGTTGCTTCGGCGGTTATGCGGTCGGCTGGGGGATCGTTAAGTTAGCTTAAGGTTATACTTTAGGCCCGCGTCTATGA	11
gen_1122	CCTTTGATTTGCTGTTACACGTAGGCGGTAAGGAAATTAAGTTAAAGACCCACGGATCGACCATCGGGTTCCAGGCATCC	11
gen_1123	TCCATGCCCTGGGGTAGAGGCATGTCCAGTGGTCAGATTTGTCGGCCAGGCAACAGTTTCGGTGAACTTGGTTGGGGGGT	11
gen_1124	TGGGTGAGTAGGCAAGAGTTTTTCAGAGATGAGTTCGTGGACTAAGGTATTAGGACTCGTAAGACCACAACGCTCCCTGG	11
gen_1125	GTCTAGAGTGCCTCCTTTTGCAGTGAAACTGGATCCTATTATCGTCGTCCCTGGTTGTTTAACGGACTAAAGGGTCGTAT	11
gen_1126	TGTTAGTCGAATATATTCAAGCGTCGCTGGCGGGTGGTGTCGAACGTCATAACGTAAGACAAAGTTCCGTACTGAGTCTC	11
gen_1127	ATGTTGTGATCAGGCATATGAGAGAAGGCGCGGCAAGTAACGAGTAGAAATTCTAAGAGCTAACATGCACAATCCGGTCA	11
gen_1128	CGGGCTCACCACGTCAACACTTTGCAGGTTTGCCATCGCATTACGCTCTAGCAAAGGTTTGGAGAACGTAGGGTGAGGGA	11
gen_1129	CATTCCCAAAGGTTGTCGCCTATTCAAAAAGCTCTTAGAGCCCTACTGTTTTGACAGCGTGGTCACGGAAAATCTGTACT	11
gen_1130	TCGATGTAGAGGGAGACTGTGCTGGTAATGGCAATAAGAGAATGTTTGTCTCTATATATGGTGCCACGCGGATGGGAGGG	11
gen_1131	AGCTAAGGAAGAACGGGGTGGGGACCCGTTCCTGCACACTGTTTAATGGTTAGACAGGACGTGCACGGGAACGGCAGGCA	11
gen_1132	AGCACAATCATAACTATTTAATGCGTCAATGTGTCGGACGGCTCAAACTAAAGCAGCACGTGTTTTGACGGTTGGACCCT	11
gen_1133	CGTTACAAGGATGGAAAGTGGATCAGCCGATGATAGGCGAGGGCAGGGGGGGCCACGGTTGCATGGAGTTACTAACGAAC	11
gen_1134	TCAGGGACGGTATGGCGTTGTCCTTAACTGTGTACGCCGTATAAAGCTTTATTAATCGGCATATCAATCGAGGCTGTGAC	11
gen_1135	TCTTGGATCCAAAGGCAGTAGTACTTAGGGATCGTTGATAAATTTGTACCGGGGAGCGCGTGTAGCTACTCAAGACTAAG	11
gen_1136	TACTTTCACCTGTCTTGCTTTCTAGACTGACCCAGCATCCCTTAGTGATCTTAGTGGTTATTCTTCATCGCGCAATTTAT	11
gen_1137	AATGTGGGGCTGTGCGCCATCTTTTAGGCTGCAAAAGGAAAGTCGAGGGTGTTGGTAGGTGTCCAGAGGTCGGCTGTTTA	11
gen_1138	TGGTGCCTGCCAGCACACATCCTTTGCCCTATCCTGTAATGACGGTGAAACAACATATCTCGTGGCTTAGCTTCTGATTG	11
gen_1139	TTATGTGCACCCGCAATTATTGACATAGCGACTCGGTATATCAGGATTTAGCCTTTTAACATTATACAAGGACATTTGGG	11
gen_1140	GGTAAGTTTGAACGTCTTGGCAATTTTTGTCAATCCGATAACTAATGTTGAATTTCACTAGATTGATACCAGGCCTAAGA	11
gen_1141	CACATCAAATTGTATTTAGGAGAATCGTAGCATGTATCGGTTAACGGCTTCGTCCGTTTCTAGTGTGCATGAGCGTAAAC	11
gen_1142	TCTCCCAATCGTTATTTACTATGGTTCTGGGCGGGTAGAGTAGTCCTGTTCTTGCAGTTCCACACATTTTTCTTCAGGAC	11
gen_1143	AACGTGCGACGTTATTACCTATGCCGGCCCCAAGTTGCATGGTTTGCTTCTTACACCGCTTAATTGTGAATGGGTTGCGA	11
gen_1144	TCGGTAACTTACGGGGATTGAGGTTAATTGATCGGACCAGTCAAATTATGTATACGCTCCAATATGTATATTGTCTCTTA	11
gen_1145	CCAGTACAAGGTAAAGAGCTGCGCCGGCTGCCCTGGCCGCATCTATTTAACAAAGTGTAATGATTAGTTGTCCTTCCCGA	11
gen_1146	TGGTGGTAACTCTCCGAATTTTAGGCTGAGGCTTGTAAGAGGGAGAGGGTACGTAGCTTGTCGGGTTGCCAACTGTGTAC	11
gen_1147	TATCATGGCCTTTGGCTACAGCTGATATCCCATTAAGGGATCGTGTCGAGTCCACCGCCTTGGCAACATCTGACTGTGTG	11
gen_1148	GAGGATAGAGGTTTCGCTCATACCGTACAGTTGTCGACGGGACATACTTGTAGTGTTTTCTCAATTCGTGCCAGCGGTGT	11
gen_1149	CTGACCTTTTCTCTGGATCACCTCTTTAACGCACCGTTTATCAGGTGGGCAACGTTGGGAACCTCTAATATACTCATTTT	11
gen_1150	CCTCGCAAACTGCACGTCTGTATTTCTTGTACCATACCTTATCAGAGAAATACGAGGAAGGCCTCATAAACAAAGTGTGA	11
gen_1151	TTTGGGCTTAGTGGGTGTGGGACCAGGCCGAGGGCAGGACTAGTGTTGGTAAGCACCGTATGTGCGGGAAGTGACAGGGA	11
gen_1152	TTTAACAGCAATGTTGCTTTGCCTTCGACTGACTTCTGATTAATAGTCTGAGATATGAGTGGGTGGGCACATGTGAGGGG	11
gen_1153	TCGGTCTAACTGCTTAAATGGTGGACAGGTCATAAAAGGCTAGCGGTTACAGGTCGTCTTGTTCCGTGTGCTAACGTGTA	11
gen_1154	TTTGTCCAGTAATCCCTGGTTAAGTTATCAAGTTTACACTATCAGCGGTCTTGTAGCACGATTTCGGGCACAGGCCGGCA	11
gen_1155	TGCATGCTATGGGTGAAGGGCACGAGGGGTGCACGTCAGTAGGCCCGGCTAGGGCTGTTGGTCATAGATGCGTGGCCAAC	11
gen_1156	CTTCGGAAGGTCCAGAACTTAAGTCGCTCAATCATGAGCACAAGCTTCTCGTACCATCTGAGGCAAGATAAGTTTTGAGA	11
gen_1157	GTCGTTGAAGCATTTTTATCTTGTTAAGTGGGCAATTTGTGGGACCTGGTTCAGTGGATGTGCGGGGTAGCGCATGCCTT	11
gen_1158	AGATTGGATCGCGTAGGGGCCGTTGCAGTATGACGGATGGGAGCTAGTGGTTGGTTCGGTGTCAGCAGCTTCTCTTGGTA	11
gen_1159	ATCTCTGTATAGTTGATGTCTGCTTTGTTTTATATTATTTCCTCTCACTTTGAAAAGGCCTCGGTTCACAAGGGATCCGA	11
gen_1160	TTGCGTGATAAAGACGTTCAGGTGGAGACACAATGACAGAATGCTCAGGCCACCGGGGGGTCTGAGGGGTTAGCTCCTGG	11
gen_1161	AGTTCGGTTTTATCTACCGCGTTGCTACTTGTGTCTAAGATGCTATCCTGACCTCGGCACAACGGTCTACAGGATCGTTT	11
gen_1162	AAGATTCATGTTCTTATTATGGCTATTATTTCAGTAAATGTTAGCATTATCTAGTTTGACGGGTTTTCGTTTTGATCGCA	11
gen_1163	GGGATGGGAGACACTCAACTCGAGACAAGGTCTAAGCCATATTTAATAAGCGGAAGGGGGGCCTAAATCTAATGTTGCGT	11
gen_1164	CTTCGATCTTTTATGTACGCCAAGATTTCAATGGTTACAACGCGTGGTGTGAAAGCAATTTTAATCATTGGTTAGGCTCA	11
gen_1165	TCTCATAGCGTGTACTCGGGGAGGCCCAGGGCTCTCGACAAGTCGATCTACGTCATGTCCGTCGACATCAGGTCATAATG	11
gen_1166	GCGTTATGTCTGCAGATAATCGGAGGGTGTGCCAAGGGAGGACATCGCCTGAGTATCGTATGGCTGGTTTGTTGTCTATT	11
gen_1167	GTAATGGTTAGGAGCTAGGATCAGGACTGAACTGGGTGGGAAGGTGCGGGGGGTTTTGACGTAATTGGTGCGGCTTGTAT	11
gen_1168	AGTTTCCAAAAAGTGCAGGCCTTCCCACCAGTGGGCTAGACCATACGACACTTTTATATTATTACATTGATAATCTGACA	11
gen_1169	AGTGCCGGCTTAAAAATTTCGTCGATATGTCGTTAGTGAGGTGGTTGACCGAAGACCCATTAACGGGTCTTAAGTAGGAT	11
gen_1170	ACCGACTTTCTAGGTTTTGATCTTGTTTAGGAGTAGACCGCAAGGTGCCGATAATACGCATTCAGGATCAAGAGGAAGGA	11
gen_1171	ACCGATTCGAACTTGATGAGCGCGGGTGTAGGGAAACTATCCATATTTCACCTTAATTCCTCACGTTAGTAATGGCCGAA	11
gen_1172	GAATGCCTGCGTACTTAGGCGAGTGTCTATATGCTATAGCTGGTTCGGCGCCAGGGCCGGCGTTCAACTATACGTTCTTA	11
gen_1173	AGGTCGGGTTGTCAAGGTTCGCATTGGTTTAGAACTTCTCCGAGGGCTATCAGTGTCCACAGTGAGACTCTGTTATCTGT	11
gen_1174	TGAGTACGTGCCTGGGCAGGGGGTCTATTTGAAAGCTTACGATTATTGGTAGGTCCTGCCGTAGGGCAGGGACGTAAGTG	11
gen_1175	TAGGTATTTGTGTTACCGGATTAGCTGTGGTCAAGACTTGGATCGGTGCAGTATTTGTACTATTATGAGCGCGTATTGTG	11
gen_1176	CCTTTGATATATGCTCCTAGATAAAGTCTTTTGGCTGGTGGGTTCTTTTTACGGATTTTGAATTTACATGGCTGGGAAGG	11
gen_1177	TTTATAAGAGGCAGACTGGACCGCCCTGGGTGACGGCATAAGATGCTAGGAGTGATTTTTTGTTAAAAGTGTGTACGTTG	11
gen_1178	TAGTGGGGCCAACGGTTCGCTAGCGGTGGCCATAATTCGAGTCTAATGTTCCTAGTCAGTTTGGCCCCGCTCCACTGGTC	11
gen_1179	ATAGTGTCGGGGAAAAGTGGGTGAAAAGACCAGTACAACTGAAGCCTCGCTGTGACATTTATTAGGGCTAGGCCTGGTAA	11
gen_1180	GGATTGCATGGGCGTTTAGTAGGGGAAAAGGTCACGGTCGTCTTGTGCTCTTAACATAGCATCTCTAGGCTATTACCAAA	11
gen_1181	AACCTGTATAGTAGTCACGATGTTGACTTTCAAGGTTTTTGAGGGTTATGATGTTCAAGTTGCTTTGGTCAATCGGGCGC	11
gen_1182	TCATCCGGTGGGAAGAGTAGCGACAAAATGGTGCTTATAGTGGCGCAGCTGAGTATGATGACAGTGGGTGCCTGGCAGTG	11
gen_1183	ACTGTACTTTAGTAGAAAGTTCATCTACTTGTCTCTTTCAATGTTTGCGCAGCGAGTCCCTGTAGGGTGTTTTACAAGGG	11
gen_1184	ATGCGTTGATGATTTCGTTGACGGCTAGTGTGGGCGTGGTAGTCTGTGGTACGTGGTTTACTAGAGCTTGCGTGTCTTGG	11
gen_1185	CGAAATGATTCGCACCCGTCTAAGGAATATGTTCAAGAGCCCTTTGCCTTTATTTAAGGATACTTTAGATGGAAGAACGA	11
gen_1186	AGAACGTGTTCGTTGTCCGTCCATTGGTCTGCGGTTGATTGGGGATGTGTGATGTGCGTTGTATATCGGCGGTAGTTTGC	11
gen_1187	GGGGTGGTCCATGTTTGTATTTGGTCCTGACTCTAAGATTCAAAAATTCTCCGGTGAAGGTGAGGTTAATTCGGTGCTTA	11
gen_1188	CTGCCCATCCAAGTTATACTTCTCTTTGAATTTTGATCTGCTTATATTAGCTTTCCCAGGATGTATATACTTTCTTCAGG	11
gen_1189	GCTATGGTTTGGAAACGGGTTCGTTTATATTTCTTCCCTATGTGGTAATCATGAAGGCCGTCATGAACGTGTGCAAGTCT	11
gen_1190	GTAAACATATGTCGTTCTTGCTTTTCCTCTGTTGTCGAAGTCATGGGATTTGCTACCCATAGACCCTTGTCCGGGTCTAA	11
gen_1191	TGATCCATTGTTTACTCGTAGAATCGGGTACATGACCCCCTTTAATCTCCGTATTGTCATTAGTGGGGTAAGTATATGTC	11
gen_1192	CTTTGACTACTTTCGCTGTCCTGTAATCGAAACTAGGTAGGGTCTGCTAATGACGCGAAATGTTAGGGGCTATCTTCGGA	11
gen_1193	AGATTCGAATTAGTGATCATGGGTTCATAGGATGGCGCTATTTTGTGGTCCGCGTGTCAGCGACCTGACGGATGAGGTGT	11
gen_1194	AATTAGGAGATGTGGCGAACTTGTCGGGCTTGCCGATTCCACTGGCGTTTCGGTGCATATTATTCGATTGTTAAGGTGTA	11
gen_1195	TCCCTCATCATGTATGGTTGAGTTGCGTTTTCCCACTAGTTGATTTACCCATTATGAGGAGTTCGTCGCGTTCTACTTGG	11
gen_1196	GCCCTGTACAACATCTCCCGTGGGGTAGTAGTAAGTATTTGCTGTGTGAACTAAGTTTGTTTGGGGTGGCACGATGCAAG	11
gen_1197	TGTCCCAGTTTGTAGTCTGTTTCGGGTCGTTGCTATCAGTCAATGGTACGTAAAGGGTTTTTGTTAGTCGCATACGGTCA	11
gen_1198	TATTCACCCTACGTGAGTTGGAACTCTTTAGCGAATAAAAAAGGTTAATCTTTTGAGTGTGCGACGTTCAGCTTCCTGAG	11
gen_1199	CACCGCATAGACCGGTCTTTCAGATCCAAAGCCTAATTTTTGGGTACGTAGCAGTAGACTAATGCTCAACGCAGGGAGGT	11
gen_1200	ATGGCCAGGATTCGGCACACGTTAATTATGATTTCGTTTGGCTCTTCTCATCTATTTGCTTTGTTGCATGACTATGTTTG	11
gen_1201	TATGGTATCTGGACGGCTAGCCGATAAAAAGACCTTGATAGCCGATGCACCATGTGAAGCATCTTAGCGGCGACACGTTA	11
gen_1202	TCTTCTTGCGGTATAGGATTCAAGTGATTTTATCCGAAATTGCGAATATGTAGTTGTTGTTTGATCTGACCTTGGCTCTA	11
gen_1203	ATTCGGCTTGTGGGTCAAATGGGTCGTACTAACATTTGTGATGGCTTCTGAACACTTTGGCTTGAGGCGATGTGGGTTAG	11
gen_1204	GACATCGCGGACAATGTTCAGTTAGTTATAGGTGTTCAGATGAGGGGGATCCATTTGGTAGCCACAGTGTGAGTGGTGAG	11
gen_1205	TATATGTTCGTCGGCTATCTATCAGCGGCAGTGATTCGGTGTGAGAGCATTGGATCGTGATCTACCTTTGGCAGTGGCTG	11
gen_1206	GAGGCATCGCTGGTGGGGAGGCCCCCCGTATAACTCGGGACACTCTCTCTAAGCTTTACCTAGGTGGCGGCAGGGGAGTA	11
gen_1207	CACGGCGGCTATCTCGGCGAGGCTAAAGAAGTCTAGGCGACAGGGTTGAGTTCAATGAGATCGAGTCCCAAGCGCTGCTT	11
gen_1208	GTAAGTAGATTAAGAGAGGGCCATCTCCACGGTCAATTAGTTCAACTGTAAGCGGTCACAATCGGTCTCGGACCAGAGGG	11
gen_1209	CCTTCCACATGCAATTCGTAGCTTATAGTTTTAGGGACGGAATGATTTAGTCGTGCAAACATTCAGGAAACTTTATCCAC	11
gen_1210	TATTACTGGTAGCATCACTCCGAAACGTATCTCGTCGTCTCCCACGCTTCTTCGGTGAATTCATCAACAGATTAAAGGTA	11
gen_1211	CATCTCAAACTCGGCCCTCCTTCTTACAGTTTTATGAGCTTGTTTTGTTACTACAATCCGCTAAATTTAGATTAACTTCT	11
gen_1212	AAATCAGAAACTATGTCCGGTCAGGTTTGTATGAGGTCATGGGTGCTGGCAGGCATGAGACATCATGAGGTTGAATTTGA	11
gen_1213	GTCGCGTACTATCCAGTATAGGTTCTATTACGTGAGCGTTAGAGTGGTCTACTCAGGTCCGGTGCATGGTGTCTTAGATG	11
gen_1214	AGCTCTGTCTCCGATTTATGGTATACTATTTTAAACGTTAGTCCACAATGATAAGGGTCCGTTCGCCTAGTGGCTTCTCC	11
gen_1215	AGTGTAAGCGGGATGGGCTGGAACGGTGGCGGTGATTGAAGTGGCAATTGCGTCGAGAAGTTGCGAATCTACTAGCGGCT	11
gen_1216	AGGTGCTTCCTGCTGTCTACATGATGATAGCGCCCCAATAGCCGTTTACTTGCGTTAGAGTGGGAGCGGGCATTAGGTTC	11
gen_1217	TTATGCATGGTTTTATTGTTGCTTCACTTCGCAGATGCTTTTTCAACGTGATCAGATACTAGTTAGACGGTTATGCGACG	11
gen_1218	TGTTACCTAAGTGAGTTGATATCATCCCCGTTTGCGAGACGCTCTAGCAGTGTGCAATTTGTGTTTTTGTGCTGCTTCGA	11
gen_1219	TCGGCGTTTATTTGTTTTACATGGGTAATATTAGTCGTGTTGTCTAGATCTAGATTTTCAGACCCAATAGTTGTGGTTTT	11
gen_1220	GTTTAGGTTGAGACGTCGTTTGTTTGTGACTTGTTAAATTTAGCTGTAGGTGGACACTTGGTGGAGTTGATGCTTTTGGA	11
gen_1221	GTTCTCAACTCGTTTGAAAACGCTAGGGTGAATGATTAGCTGTTTGTTTTGATCCTCGAATATTTTCTTCAGGGGGGAGG	11
gen_1222	TGTGACGAACATGAGCTGTGTCTTGAGATCACACTGGTCTTCATGGGTGGTCACGTTGTTCAGCTAGCGTTTATGCAGTG	11
gen_1223	CAAGTCCGTGAGCTCTTCCCTACGATTCCCGTTTTTTAGTATTGCTGGTCGTCATCCCTTACACGAGTATTATTTCTAAT	11
gen_1224	GGTGCGTGCATGCTGTCGTAAAGGGTAGGTGTCCCACGTGTGTTGTTGAAGTTACGGATAACCAGTAGTCTGCGAGATGA	11
gen_1225	TCCTGTTGTCTCATCCAGTTGTCTAAAAGTTGGAGGTGGGTTGGGTATGTTTTTTATTCAATTGTCACCTGCAGCTTGAG	11
gen_1226	CCAACGACTAAGACAGTTATAAAAGTTTTGATACAAGGCCACGCGGGCGGCCTATATTGTACTACAGGCTTTTGTGCATA	11
gen_1227	GGCAGGGCATTGTTGTCAGGCTGCCATTATTTGGGGTGCTGAATCCCCGGTGCCACGTCCACGAACAGCAGCAGGGCAAT	11
gen_1228	TTAGGTTTGGTTTCGACTCATCAATAAGGATTGCTCAATTGGATCGATGTTTGGTCGGCTCGGCATGATAGAGGCTCCTG	11
gen_1229	TTCATCCGTTTGCAGGTTTTGAGTCTTTATCCGCTGCGGTTCTAATGTATTCATGGGCTCTGATTAGTCGGGGCCCGTTG	11
gen_1230	GCTTGTGGAGCCAGGTCCCACACGGTTTTGGCTTTTTGTTGCTGTATGTATAGAGTCTTGTCTTCGGGTGGTGTTGTTTA	11
gen_1231	GCACGGTTTAAGCTACAAGTGCTTATTCTCGTGGAGTTCCAGTCTGTGCGAAACTGAAAAGGGTCGAGCAAAAGCTCTGA	11
gen_1232	AGCTATTCCTTATGAGGCTCTTGGTGTTATGTAGGCATCTAATACGGTGCAGCGGCAATGGAAAAGGTTACTCGTCCTGA	11
gen_1233	TCTTGTGCGTCGATTGAGATTTTTATTAAAAAGTCTCGACGAGGTCGGCAAGGCTGACTGTTCATGGTATCTGAATGAGG	11
gen_1234	CCAAGGTTTATGACGTGTGTGGAACCTTTTCGGGGCGAATGCATATTCTCAAATAATGATATAATTGCGATGCTCGGTGT	11
gen_1235	TACGTTGGTATTGGCTAGTATGTGGGGTGCTTTGGCCTCGTTCGGGTGGCTCGCATGCATTAGCGAAGGAAGTGTATGGC	11
gen_1236	TAAGTGTACTGCAGCACTTCCAGCTATAAGTCATTTATCGGAGAGATTGATCGGTTGAACCGAGCCGATTATGGGGCGGC	11
gen_1237	GAGATACGATCGCGGCAGAAGCTTTACGCCCTGCTTATATTTGTGTTTGACAGTTTCAGCATGGTGTGCATCAATCTTGG	11
gen_1238	TTCGGCTCAGAGATCTAAGCTGGCACTTAACGGGAAACGGTCGGAGACAAGGACTAGTAATTGTATTGTGAGGTGAAGTA	11
gen_1239	GCAACTGCGGGTACTCGTTTTACTATTAATGAGTTAGAGATTGATTTTACGGGCGAATAGTTAATTATTAGAGCAGAACA	11
gen_1240	CACCTGATGCACACGGCAGGCATCTTGGCTTTCTCTTATTTCGCTTCAGTGAAAGTAGAACGTCTTGGTAGCTGGAACTA	11
gen_1241	CTTTGATTACTACAAGACCATGAGACCCGTTTTTGTAATTATGTTTCTAGTGAAAGTTCTTTTGTCTGCTTGAGTTGACG	11
gen_1242	CTAACATGTTCCAATTGCCGGATACTTTGATTAATGCGTGCGGCTAATATGTTCCACCTAATTCGAAAGAATCGTGCAGA	11
gen_1243	ATTAGATCGTTAAGCGGGGGATTCGCAGCCAAACGCATTTAAAATATAGAGCTGGCCATGCTTCGCTTCAAAGGGTACGA	11
gen_1244	TGTGCACTGTCTGGTCAGCGTCCTATGCTCAGAAATTGCGTTTTACATGATTTTACCTGCGAGATCCATCTCATCTGCTC	11
gen_1245	AATAGTAAGAGTTCGTCCTCCTTGCACGAGCGGAAATACAATTGGTTCTGGATTGTGAGCAACGGAGCCTGCGCACTCTA	11
gen_1246	CAATATGATCCGCAAACAAGGTACCACCCAGCTACGTTAGATATAGTAAAACTATACTACCGACATGGCCGCGGGTTCAG	11
gen_1247	TCCGGCTATAGGGGTCTGTTCTGCTTGGTCCTTAACATGTTGATCCGTTTCTGAAAAGTAGTAGGTAGTCGTTCGTGGGT	11
gen_1248	TTGTACGTTATACGTGCGCATTCTTGTTGGGTGAAGCTATTAGTGAACGGAGTGATTGATGTCTTGGGTGGCCCCTAGTA	11
gen_1249	AGGCTTTACGCGTAAGGGTCTCTTCGTAGGAGTGCCCCAGACTTCTGGACAGGGTGGCTTGAGAGGAGTCTCGGAGTGAA	11
gen_1250	TATTGTCACATGATTTTTAAAATTCGGGATGGTTCGTTTATTATTGAAGGGTAGCGCTAGACAGTTTTTGGTCCTGATGA	11
gen_1251	CTTTAATTCACGATTTACTTTGTGCGGTGCTCTCGTTAAGGCGTTTAGTATCGTCAATAAATCGCAACCTGATTGTGGTG	11
gen_1252	GCTATCCTATTTTGTTATAGTAATTCCAAGACCCGGCCTTTATAGTTCTCAGACACGTGTCACAAGCCACGTGTGGGCTA	11
gen_1253	TTTAGTGGGGGCCTATCGTTATATTTCTTTAATGCAACCCGTAGTACACCGTAAAGTAATTTATTGGTACCGGCTGGCGA	11
gen_1254	TCTTACGTCCGGGGAGAAAGTTTGAGAGCTCTCGATCTATGAGTGTCTAACGATGCCGGGATTTGCTGCTGGCGGGTGTA	11
gen_1255	TCGATGTGGAGGGTAGAAAGGGAGACGGGTCTAGTCAGGGTCGGACTGGTCGGCGTTGATTACTGGGGGCTGTCCATCAT	11
gen_1256	TTAGATTATGGCGAACGACACCAGGTTCGTGTTCGGTAACTGAATGAATACTGAAACCGTGCAACTTTGTATGGGGAGTC	11
gen_1257	GTGGTTCCATACGGGGAATAGAGGGGAGATCATTTGAAAATTTTGGGATGTAGGCTGTTATTTGGTGTCATCGTCACACT	11
gen_1258	ACCGGACCGCTTTATCAATCTTCATGGTTATGGTCTTCAAGTTCAAGAAGCTATCAATGGTATCTTGGCGATTCGCGGGC	11
gen_1259	TGCCAAATATGGTTATGTGCTGCTTATTAGACACTGTGCAGCTGGGAATTTAACGGTCGATCTTGATTAGAGCGGGGTGG	11
gen_1260	TTGCGGTATATCAGGGAGCTCAGATCTTATCCGGAGGTAGGTTGCCAGACTCGCAAAGAGAGGAGTGTGGGGTGTTACGA	11
gen_1261	GGTCTATTCTCAGCCTATTGGTGTCTGGTTCATGTCTTAGTGGGAGTTAGTTACCGACGGGGTTTGAGCGTGTGGGGGAT	11
gen_1262	AAGAATTATGTTGTAAATTGTTATCGAGTGGTTGTGTGTAACCCTCTGTTGAGCGGATATTTGCGCCCTTTCTGCCTTGA	11
gen_1263	TATTTCGTAGAGGTGCATCTAGGAGGCGTTTCCTCAGCCCGGTTGCATGTGTAACTTGCGATACTCCTATCAGCTATAAA	11
gen_1264	TGCCAGTGAATATGTGCACTTGCAAATCTCTGAGTTACTAAGTTTATGTCTGATCTGTGTGGATAAAATATGTCGTCACA	11
gen_1265	GTCTTACGCGGTTATCGTAGGTGCATCTGAATCCTCCTGTGCATACAAATGTCGTGAACCTGTTCACTCCGGGGTTACGA	11
gen_1266	TGTGAGCTTAGTTCAGCTGCGTTAAAGAGTTGGGTGTTGCAACCCACGTTAGGTTTTGTATTCGAGAATATAAAAGTTGA	11
gen_1267	TAACGCTCGGGTTCCATTCTGTTTCCCTGGAGGCAGTTTAGATTCGCATGGCTGCAGGTCCACTTGGTTAGATCCATCGT	11
gen_1268	CGTAATGAGTCGTTAGACTCTTTCCCTTGTACTAAGTAGGCTGCGGACGGTGGGCTTGCAGAATGCTTCGGCTGGTAATA	11
gen_1269	AATGTGTCAGTTAACTCAGAGACGTCAACGGAACTTTCTATAAATCGCGGGATGAGAACATCTAAACTACTTTCGTGCTA	11
gen_1270	GTGATTTAGCTGATTTCGAAGCCTAATGGTTGTATGGTCATACCTCTCTATTTCTTCGTTTATTTTTGGCCAAGGCCGGC	11
gen_1271	GTCATATGTGGCGCCTATATTTATCTTGTGTTCGTTTTACAGAAAGAAGTAATCTGTTGCGCTGGGGCAGCGCATGGAAT	11
gen_1272	GTTGTGCAGCTCTGGCGGACACCCGGTGAAAGCCACAGGAAATTGGTCATAGGATTCGTTATTAAGTGTGACCGATCTGA	11
gen_1273	GTCTCCTATTCATGGTGACTAGACATTTCTTGAATTTATGCGATTTTAGCAGGCCGATTACGATTTCGTGCGTCAAATGA	11
gen_1274	GTTTGAATTTTTGGCGGACAGCTGTACAGCTGGAAACTAGCCTATAGTTCAAAAATGACCAATGTGGGCTGTCCGGTGAA	11
gen_1275	TCTTGGGCTGCAGAATAGGCCGTGCGATTTATTGCAGTGAGAGGAGGCAGTCCTAGCTAGTCTCCCCTTACGAGGCTCGA	11
gen_1276	GTGGGGTGATTACACGGATTGCGGCTTATAAATTGAGACTGGATAGGCATTCCTGTTTGGATTCGATGTGATAGTTTTGA	11
gen_1277	TCACCTAAGACTTAAAAATATTGCGTTTATTTCAGAGTAATGTGAGTCTTAGGTTGCAGGACGATTTTTATCCCCGTGTA	11
gen_1278	TACGTTTGAAAAGGTTTGAGGCTTAGATGTTTTAAGCTTGTGTCGTAAACTTCGTGCTGTCTCGGCTGGCCTCTGTGAAG	11
gen_1279	CCGCTGTTCTAAGTCTCACGCAGAGCTATGGTGCTGGTATGAATTATGGAGGGCTAGCACCTCCCACGGTCGCGAAGGTC	11
gen_1280	TAGGGTAGGATCAGGATATTACTTATGGCGCCACGAATGGTTACTCTAAAACGGATCGCCTTTCGGACATTCGACTGATG	11
gen_1281	TCTATATCCTTTGTCTGTCTTTCCATCCGGGAATATGTCCCTTCCTGGGTATGTTACTTCTCTATGTCTCTACAGCTTCG	11
gen_1282	CTGAAATGGTGGGGTTCTAAGCGTCTCGTTTAGATATGAATGTTGCATTTGCACGTTATACGTTGAATTCCTCAATATCG	11
gen_1283	ATCGTCATCTCTTTTCAGTGATCAAGTACGGTATTCTCAGGGTCTACCGCGGCAGGGCAAACATACGTATTTAATTCGGT	11
gen_1284	CCTCACGGTGTAGATGGAGCTTTTGTTACAAACTTCCTATATTGAGGACTTCACGACCTCGCAGAGCTGCACCCCGGTTC	11
gen_1285	GAACTCCTAAACATCCGTTCTTGCTGTGAATGTCAGATATTTCGTGTTGAGCGGTGAACTGCTGCACGTCATGTCGGGGA	11
gen_1286	GCATACTAAGGCAGTACGGGGGGTAATGTCGATTGTTCGATTAGGTTTGTTCATCTGATGAGACGGGACTCGGTTGCGAG	11
gen_1287	GCAGGTTGACGCATCCGACATAACCTTGTTGGCTATGTTCCATCAAGTACAAGTGTGGAGAGACAAGAAAGGAGGTGCTT	11
gen_1288	GTAGTTTCGTAACGCCCCGACGAAGAGCTACTGTTGCAGTTTTACATTGGTCATTGTATCGCGGGTTGTTTCTTACATTA	11
gen_1289	GAAAATGGCAGTTCTCAGACCACGGGGGTCATACCCTATATAGACAGGGATTTAGGTATGTATGTGGTCACGAAGTTTGC	11
gen_1290	TTGTGGTTTTTTAGGTAATTCCCAACAAGTGTACGTTTTTCATTAGATATTATTATATTGTCGCTATTGAAGGGTTAACA	11
gen_1291	TCATTTAAGCGACGCCTTGGAGAATACGTTTTCTATAAGTATCGAAGATTGATATCAGTATTTAAATCGATTACATTCAT	11
gen_1292	TCTACGTGCGTGTGGTTAGTTCTATATACGTATCAGGTCAAAATGTGACTTGTTACTGATATCATCATTGGGTTCGCTTC	11
gen_1293	TCATTCCTGAGGCAATTTGCTTACCTTTCGTCAAAGAACAAATCCTGTCCTAAATTTGATTTCTAGGTTAGGGTATGTTA	11
gen_1294	TCGATTACGATGGCAGCAGGGGTTGAGGTCAGATACGACTAGGGGCAGTCTTGGAGAGCCGGTTGTTAGTGGGCGCCTGG	11
gen_1295	TTGTCTAAAGTTGGACGGTTGGGGGCAGATAAAGCCCAGGAGTCTAGGGTTTACCGGGACATGTGCTTGGCGCTTGTAGA	11
gen_1296	TTAAAGTATGTGGTCATGACCGCACCGTGGTGGTCGTGGCCAGGGCCTGGTCCATGGGTTAAGCCATGAGGGGTTTCCAG	11
gen_1297	GTTGCGCTTATCTGTCGGTAGTTGGCTCTTAATTAATGCGTTAACTATTTCCTTATATGGTACTCCGTGATCATCGTTTT	11
gen_1298	TGCACGCATAGAAATGCAAGAATTTCAGATACAAATCAAACTACCAGGCGGATAGGGGACACGTGGGGCTGGCGTTGTAT	11
gen_1299	CTAAGTTAGTTATATCTGGGTAGTCTGAGGTTCGGATAGCCGGGTGCTGGGCATCAGGCGCTCACTGATAGCTCAGGTGA	11
gen_1300	ACTAACTAGGGACATTTGAAAATCCTCTGAGGATGAGCACGTTATTGTATTTCGGTAGTTGTGGATCACTACATGTCATC	11
gen_1301	TTTATAGTCGTAGCGTGAGCGTACACTGTTGGTCCTTGTCGGCACCAGAAAGGTACGAGTCGATTTACACAGGAAGTCGA	11
gen_1302	GAATTTCAGTCCGTCGAAAGGATGTTACGGCTTATCCAAGTTCTACAGTTTGAACACATTTATCAGGGTCAGCAGCGCTA	11
gen_1303	CGGGACTCCTTCGTATCAATGTCTTCGCGAAACTACGGTGATCTGCTCTAGATATCATACGATCATAGGGCAGTCGTTCA	11
gen_1304	CCGGTAACTCGTAGGTGAGTAGATTGTAACACGTTGTACATCTCACCCTAGGCATTTTTTATAATGAGTAGGTTTGCACA	11
gen_1305	TTTACTTCTTTTTTAGGGATTATAGTGTGTATACGGCTGGCGATTAGAGGGTATGGTCGCGTTGGAGTCCTGGTACGATC	11
gen_1306	GTTTGGGAACGGTACGTTCTGGCATAGTGGTTCTGGTATTGTACGCTCTACAGGTACCAGCTCGTCCTCCACGGTGCGAA	11
gen_1307	TACTATAGTGTCCTATAGGGGGTATGTTCAGAAGGGGGTCCGACCTAGTCCTGCCCATAGCACCTGCTCATGGCAGATCT	11
gen_1308	GGTTTAGCATTATTGTAATGTATCCATAGGTTCTGTACGCGGGTGTAAGCTCTAGAGGGTACCCCCGGTCTCGTGACAGT	11
gen_1309	TATAAAAGCGTATAGGACGATGATCTTACAGAAGTTTGTACTCTCTTGAGATGGCGTGCTCACTCTAGAAGTAGGAAATT	11
gen_1310	TTGTGTGCATGGGATCAATGATCCGTGAGTCTTGGAGCGCGAGGGTATTCTAGTTACAATCTTTTTAGGCTTCAACACGA	11
gen_1311	GGGTGAAGTCATACCTGGAGGTTAATCTGAATATATAAAATGTTGCACCGGGAGGCTACATACATGCTCCAAGCGTGCGT	11
gen_1312	GGTAGGTGTAACCGGATCGGTCCAGAATTCTTCTAAGAGAGGAAGTGGACTGTCTATGGGACGTCGCAGTTTTTTGTTGT	11
gen_1313	TTCGATTGGGTGTTTACACAGTACTATGCGTGATAACTTGGCGGCTACCGATCAGGTTTGGTGGCCCGGGCCGCATATGA	11
gen_1314	AGGTCGCTGTTGGAATTTGTGTGGCATCATATGGGTTCCTTTTCGGGATCGATATAACTTGTTTCTATTAAAGAGGACGT	11
gen_1315	TTGACACGTGTTATATTCTACCTGATGATTAGTGTCAGCTGTTTTCTCCCACGGTGGAAAAACTGCAGTCACTTATCGTA	11
gen_1316	TGTATTTCTTAGCAGTCGTCAGGGCTTGATGCTTAGTCTGGCGAGACGCTGCTGATTCTACATCGCGGTAGAGGAGCGGT	11
gen_1317	TGGGGACGACAGATTGTAGTGTAGTTTACAATCAAAGCAGGGAGAACAGGCCGTCAGTAGGGCGCGACTTCACCTGCGTT	11
gen_1318	TACTTGCATCGGTAAGAGGTGCGTAGCAATCGCGGGCTTGATTTAGGGACCTGGTAGTGAGGCCATGTCAAAAGCTACGA	11
gen_1319	TTAGAAGGATGCACTGGTTATCTGTGCATTTGGGCGGGTGCAGTGATGCGTAAATGGTTTCCCCTGGTTAGACTTGCCTA	11
gen_1320	CAAATCAAAGCTGAAATTTAACCTTAGCTGGTACGAGGGTTAAAATCTTGCTATTCGAAGTAGGATCGGCGGAAGTCGTT	11
gen_1321	ATTAGGTAGAGCAGGTATGAATGGATTTCCATCACTTTCGGCGAAGAACAATATCGGGACCCAAATTCAGGACCACGAGG	11
gen_1322	TATTATACAGGCCACTCGGATTCTCTACACTATCGATGCATGGATTGAGGTGATTTGATATACGGAGGATGGCACGGTGG	11
gen_1323	ATAGTACCAAGTCACTACCTTGGATGCCGAGGACGCAGTGATATAGGCTTATACGGGGTATCCTGCTGTGACGTGTGCGA	11
gen_1324	AGTAATGCATCTATGGGTGACGGCCGCTATCGGTAATACACCCGGACTTTGGTTATGCCAGATCGGATCTGGGGGGTACT	11
gen_1325	TCGATAGTCAGCCTCAGCTCGCTTCTTTGTCGTCTGCCTCCATGGCCTGCAGTGCTGTGAGGTTTGGAACAGTTTTAATG	11
gen_1326	CAGTGGCAATTACTCCGGTATGTAGCACTTGGAGCCTAGGCTCCTCGGAATCTGCGAGTGACATGGACGGGGCTATTGGA	11
gen_1327	TATGGGCTTGCCGCATCTAGGCTTAGATAAGCGCCAATACGGAGAAAGGCTTAGTATGGTTCTGCGTGATGTGCAGTATG	11
gen_1328	ATTGAGTTTTTAATGAGGGCACGACGGCGGCAGGAGTCACCAGTGGGACGTTGTGCTGGTCCCTCCATGTTTGAACAATG	11
gen_1329	TTGATGCATTTTAGTCAGCATGATTTGTTGTTACTGGATTATTCTTATTCTTATCGCGAATTACCAAGATGGGCGCGACA	11
gen_1330	GAACCCTCAGTTTATAAGTAAAACCTCGTTGGTTCTGTGAGCCCCCGGGGAATAGGCGAGTAAGGTTAAGGCTGTATGTA	11
gen_1331	TTATGTGGCCCCGTGTGCCAGTCGCTATCGTCCCTTTCAGCGAAGCTTGGCTTGATATCAGTAAAGCAATGGGAGCTGAG	11
gen_1332	CTCAACTCCAGCGTAACAGAATGTGAAAAGGCATTGAGTAGGTGCCCCATAATGCTGTGTGTTACGACGGTGCTGTCATT	11
gen_1333	AGGGTACTAGTTCGTAGACGGTGGCGAGAGCTGAACGGGACCGAGGTTCTATTCAACTCTGGACCTGCGTAAGGGACGGC	11
gen_1334	GATATGATGTCGGGGTAGAAGTTCGTGTTGTAGTCCAGTACGGGCATAAACTAGCACTAGATAGGCTGAACACGGCGAGA	11
gen_1335	CGGTCGCTAGTGGCCCGGAATGACATGAACTACCTCTTTATCTTAACCTCGACGAATTTTATCTTGTTTCTGCTGTTAGA	11
gen_1336	AGCGCATCTCCTTGGCAGCACGTATTCGCTCAGGAAGATGAGATTGTGGTACCAATTGATGGGAGGCGCTACTCTAACGC	11
gen_1337	TACAAGTTCTGGGGGCGTCTGAATGTTTTTGCGGATTCGTAACAATTGGCCTGTCGTCACCTGGGACCTTAGTCTAATAC	11
gen_1338	GTGGTAACAGTCGTGATATCTTTGTAGCTAAGTGCGGACTGATGGAGTGGTCTCTGAAGGGAGTGTTGCTGCGCTGCCGG	11
gen_1339	CGGAGGGACTTCTTGGGCTATTCTGTATGCTTCTTGGTAAGTGCTAGCGTCGAATGAGTCTGGACCGATCTAGCGTTTCC	11
gen_1340	AGTTAGGGTAGTTAATTAAATCGTTTTGGCTTAAATCAGACATTTAGGCTTATTATAGGCCGCCTTAAATTCGCGGCTAC	11
gen_1341	TTCCGCCCAAAAAGCATCGGCAGGCCTATTATCTAGTGGTGGTTATTACGACAGGATAGGTGGGTTTTTCAGGCTTATGT	11
gen_1342	TGTCTCCTGTGCACCGAGTGGGTGGGATGATTTAATAGCTGTAGCCGCCAGGGGATGCTTCGGTACGCCTTGTGATGGCA	11
gen_1343	TTTTCTACGGTACAGGAGCTCCTCCGAATGGATCATATGAGCCTTGTTCGGAATGGTGGGATGGTACCTTCCTGGTTGTC	11
gen_1344	CCACGGAGTAACAAATGGATCAAGCCTGTTAATCACCCTCGAATCGGACATCTGCAATCGCGAGTGGGGCTTGGTGGCAA	11
gen_1345	TGTTTCAGGTACTGTTAAAGCCTTTGCGCATGAAGCCCGTTTATGGTACCCTGAAGCTACACACGAACTCGCTGCTGGGT	11
gen_1346	TGTTCAGTTCCTATACATTTATTTAGTTCTGTTTATATCAGGTATTTTTCATTTCGAGATTATATTGATCTACCTACTTC	11
gen_1347	CGCTCTGATGCATCCCTGAGTGCGAGTGTCGTGGGACCACACTATCATACCTGGCGTTAGTCACTTGTGGGGTGCTGTCT	11
gen_1348	CTATGAGACTGGGTTGATTTCTCATCATACAGGGCCTCCGTTAGGGAGGTAAAAAGCGTTGGTATGGAGCCTGTGCGGTG	11
gen_1349	AAGGCTGACGGTCGGGGGCTATCAGATGTTGTAACGTCGAGGGCAGCTGAGTAGCGGGTACCGCAGGCGAAGACAGGTGT	11
gen_1350	TATCCTATAGATTCAGTGTGTGCTCTGGTGAGCCGATGCTTGGAGATACGTGGATTGACCTGACATCATGGCGGGGGCAG	11
gen_1351	GTGGTTAAATAAGGCTAGGTTGTAGATTGGTTCGCGTTCTTTAGGACCTGTAAACGCAGGGACCGCTAGTCCCGTCAGGA	11
gen_1352	TCTTACGGGTGAGATTTTAGTAGCGTTGCGTCGATTCTGATCGGTGCTAGAATAGACAAAGGGTGCTTCTGTCATTGACC	11
gen_1353	TGAGGCTTCATCTAAAGTCGGTGAAGTTGATGACACGAGGATTTTTATGCTTGATATACGTAGTCAAGGCAGGCGGGTTC	11
gen_1354	GTAGCTCAGATGCTCTCCCCGCTATTCCCAATCTTCGATTAAACTTCTTGGCAAATACAGTGCGCACAACTGTACCATGT	11
gen_1355	AACAAGGGGGATTGCTTCAGGAACTGAGCGGCACAGCGGCAGTACTTTGGACAGCCCGGACTAATCAGCGACTTTGCCAA	11
gen_1356	TGTGAGGATATGCCGTTATTCATTCCTCCTCTCGCGTTGCAAGCGGTCACTGTTTGGTTTCTTACCTAATTCGAGTTATT	11
gen_1357	TTCTTCAGAACGAAATCCGTTCGAGATAGTGGAGGTTATGAAAACAATGTTGATTCTTCGGCCTGACGATATGGAGACTA	11
gen_1358	TACTCGCATGCTGTTAGGACTGAAGCGTTACTGTGGGGGTGTTTGTGTCAACACGGCTATGCGCCACTGGTTCTTGACGA	11
gen_1359	GAGGATTTCCTAATGGATCAAAGCCCTTGGGCACCTCTGTCAGTTTACAGCTCCTCAGATTTGTTAGTCGTCGGGCACAG	11
gen_1360	ACTAGGTTCGGCATTAGTGGGTGGTTTTTGGGGCTTACGGTGGTTATAGGCGTCATGAGCTCGATGCTATAAGGTGTGGA	11
gen_1361	TCGATGGCAAAGGGGCAGGTTTTTAGTTTATATTGGTATTGTGTGTAGGCTTGACGTCTGAGGGTCCGACGTCAATCACG	11
gen_1362	TGCAAAGCACGTCGTTGGCAGGGTCAACGGGAGGGAACAAGATACTAGATGCTCTTTCCGATCGGTGGATCCCCCGACTA	11
gen_1363	GGATTACGTTTTAGGTCTAATAACTTGCCTCCGCCTATAGGCACATTCGTACGCTGCAATATGTTGCGTTCACATATCAT	11
gen_1364	AGTTACAATTGGCAATTTGTTATTGTAGATACTGAGTTTTCTATACGGCGGCACTTTGTGGGTGTATAGGTACGCACACA	11
gen_1365	ATTTGTATCGCATCCAGCGGGTCTTTCACCACATCACGTAGATACGGTTTCAGAAGGGAGCGCATGGCCTGTTTATAGAT	11
gen_1366	CTACTCATTTCTGAGTTCACCATTTTGACGCGGGATCTACAGGCTTTCCTCCCACGTCCACTTGGGATGCTACGGTAGTA	11
gen_1367	TTGTATTGGATCGCGGTACACTGGAGTACGCTGTTTCTTTTTGTTGCTTGCTGTTCTAAGCATATAAAGTTCGTTAATTA	11
gen_1368	TCTTTTTACACTATGAGTTGGTACGCGGGCAGCCCAACGTCACCTTTTCATGAGAGAGTCGTAGTCGGGTGGTGAGCTGT	11
gen_1369	GTTTTAGGTGGTTTTTATGGTTCTGCGTCTGAGAAGTACTCCGCTTTAACTGTACGACGTCCTTAGAGTTTAGTGCAGGA	11
gen_1370	CTCTTAAGTCAGTTGAGAAGGAACCTAATTAATGATGCTCGCATCCTAGAGCGGTACTAGTCGGATGGGTTTACGCGCAC	11
gen_1371	CTCTATTGGATCTGCTCTTCTTAACTTTATCATATTTATTTCCATCGGGATTCAATAGAGCATTTTCAATGCAGGCCACG	11
gen_1372	TCGTTAATACGCCATTTTGTTATACGGTAGGGATAAAGTGTTTTATTTTTGGATGGATCGTAGATGGGGAGTTGGGACAG	11
gen_1373	GCTCTGAGTGCTATGTGTCTGTCTTCATGGATCCCAAATGCGGCCGGAAAGCTTCCTTAAAGTTTCCTCCTACTGTGTGA	11
gen_1374	TAGTAATTTGGTGGGTGTCTGTGCCATGTGTCTGAAGGGTGGAACAGGCCGCAGCGCATAAGCCTCGTGAATGTAGTACA	11
gen_1375	CATATAATATTCTTTCCGTTTATTTTCAGGAATACGTAGATATTACTATCATATTGGTTTTGCAAGCTAAGTACATCGGA	11
gen_1376	ATACGTTCTAGAATACAGTGAGTATGGGGCTGTTAAAATCGCGTGGCTTCTATGCCGGATGTTTCGTGTGTAGGTTTCGA	11
gen_1377	CACGAACTAGAATTAATTCTGACACTAGTATTTCAACTTATTGGGTTAAGTATGTGGCCGCTCATAGCGGATCGGGTCTG	11
gen_1378	GGAAGTATGTACTGGAGTACAAAGGACGAGGTCATGTAGTGTTCGTATACTAGGATTGAGAAGGACGGCGAGGCGGGGCA	11
gen_1379	TCTAGGTGAGTCGGCAGTTAGGCGTTGCTTGCCCCGATTACTGATGCGGTTGAATATTGGTGTCAGATTCTTCTCTCATG	11
gen_1380	CGAGCGATCGTCAAAGTGGATTTGCACGAATTGGCTGTGTGTTGTGAGCTTTGTCCACTAATAAGCGCTGACAGGGTGTA	11
gen_1381	ACTCGGTTAACATTCATCGGTATTCAGTTATTGGGCGATAGATACGTAGGTACCGTGCCAACATCTAAGGACCGAACGTA	11
gen_1382	AGAGCTTATTGGGGTCGGCTTCCGACATGGGGAGACGACAAGATGTTATCGCGTGTGGTGTTCACCGGTTAAAGCTTGTT	11
gen_1383	TAAATAGATCTTGATGACAAGGGTACCATTTACTGACCAGTCTTTATTGTTTAGCCACTTTTCGGCAGTAATTTCGCACA	11
gen_1384	GTAGTTTTTAAGGACTATAATGATCACTTAGTAGCGGTCCTAGAAAAGACGGAGCATACGTAATCGCTACCGGGTGTTAG	11
gen_1385	TGGTGCCCTCTTGAGAGGGCAGAACCTCCTCTGCAGCCTTAGCTTCAGGTTTCATCGGTGCTCCGAGGCTAGGCCGCTGA	11
gen_1386	CTCGTAAACTTCGACGCCCTTACTGTATATTCCGCTGTATTTGTATCGTTTGCTCGATATCGATGGTTTTGGCAAAAGGA	11
gen_1387	ATTTGTTGTAATGTACATACGCCGGGCGCTGCTTCGTATTATAGTGATGTTCGATTATAAAGCCAGGTTTATTGATGTGG	11
gen_1388	CCACAAGTAGAAATAATGTAGGCCGATGGTAGAATTGTATGTCTGTTTCGGATCCATCAGTTGTAATTAAGCGGACATGA	11
gen_1389	TCGTGTTATAGGCTGTGAGAAGGTACCCTTACATTGATTGAATATGGCCGCTTCTAATCTCGTCTTTTATATGTTTGTGG	11
gen_1390	AGGATACAAGGGTAGGAGGCCGACGGCTAGCTGAGATAGCTAAATACTGCTCGGTCATGAAGTGGTGGCAGTCGGGGTTA	11
gen_1391	TTATCCGCATATGACCCTCGTCGTTCTCTAGTGATTTTTATGGTTAGAAGTTTTAGTCACCACTTGTTATTGTACGCTTA	11
gen_1392	TTCTTCTCGGTCTCACCTCGATTCATTAAAATCTATTAATTGGTACGATGCTATAACGGAATCAATTAGGAAGGCTAATA	11
gen_1393	AACCTGTAGAATGGTATCTTCTACGGTGTCGCACACTAAGGAGACCGGGACCCAGATCGTAGAAATTGGCGAGTACAATG	11
gen_1394	ATTGGGTTCTATCATGCTACGCAAGTGCACGCAGCAAGAGGGCGCAGAGGTGGCTCACAGCGGTTAGTGGGTGTTGCGCA	11
gen_1395	AGCTGACCTGACTGGAATCGTCAGGCGGTTTTTTGGTTCAGTGTCGAGGTCATCTAGAGTTACAACACACCGCACTTTTA	11
gen_1396	ACTGAAATAAGCGAACTCTGGCCCGGGACATGGTTTCTCATATCCCCCAAGACATGGAAGTGTTTCCTCAATTTTATAAT	11
gen_1397	GCTAGCAGAGAGCTTTCGAACGCTTGCAGGAATCAGACGCATGCATTACTTCACACCGACTGGACAGCGGCCGGTTAATG	11
gen_1398	AATAGAGTAGAAGTTTAATTAAAAGGTTATCTGGCACGAGCTTCTGCGCATCATGCAGGGGTGTAGAAAACTTCCTCCCA	11
gen_1399	ATATCGTTTGGAAAACTAGTCTACAAAGGAAGCGAAGAAGCCGTGCACAAAAGATCTTGTGGTGCCCCCGGAATTGTGGA	11
gen_1400	ATTCGTATAGGAAAACGAGATGGGCGGCTTGTGTCCTGATTGAGTGTTTATCGTGAACCGCCCTCTACAAGGTCGGTGCA	11
gen_1401	TTATACGTTCAGGAGGAGACCCTTGCACGTCACGTACGGCAGGTTACCGCAAAGTTGTTAGCTAGTTTTACTCCCGCAAT	11
gen_1402	TCAATTGCCTTAGTGAAGGGGTTCCTCTTTGTGGTCAGACACGTTATTTAATTAGATTTCTCTGACGGGTTATAAACCTG	11
gen_1403	TCGAGTCTAGGTTCATGTCTAGGGCACGGGAGACTAACGCCTGATTAAGGCCCCCAGTCCGGGCTAATAAGCAGCGGGTA	11
gen_1404	TGTTAGGGGACATAAATAGGTAATTCTCGCTTAACTCGGCTCCAGATTCGGTTGTACCTGCGTCAGTCAACGGTTATGGA	11
gen_1405	TGGGTCGATGTGTGGCAGGTGCGGCGGTCACCACCGTGCATAGAATATTGGCTAGGCAGTTGGAGGCCTGTTGCTCACGA	11
gen_1406	CCTACTCGTCTTCGGCTAATGATTTAGTTGCATTTGGTGAAAAGTGCGATTCTGATTGTGGTGATACTACGTCGTGGGCA	11
gen_1407	GTAGACCCTAATTCTTATCGCCGATAGGCCCAGTAGGCTTTCTTACTCATGGAGAAGCAGGACCGGCCCCCAGAGCCTCA	11
gen_1408	CTTATGAAGAAGTATGATCCGTCTTAGAGCCGAGAGTCCGTGATTTGTTCTTAGGTAGGTCACTTGAGTCAGCATGTGGA	11
gen_1409	TATTGGCAGATAGGTAATATTTGTCGGGGTAGCATCTTTATGTGTATTCAAATCCCTAAAGCGGCTTTTCTATTGCAATA	11
gen_1410	GTCTCTATGGGAAGGTTCTTTTGTGAATGCTAGAACAAGAATTCTCGTTATTCAAAGAATGACTCTCCGGGGAGCGGGGA	11
gen_1411	TACTAATTAATGTCGGGTGGATGTCGGTCCATTATTTGACGCATATAACAAGTGCGAGTTGGCGTTGGCGATAGTGGCGA	11
gen_1412	TAACAGATGTATTGTAAAGTAGTCCGAGTCATCAAATGAAGGTTTTTGTCCACTAAAGCCGACGTAATGCACTGGGCACA	11
gen_1413	CAGCGCAGATTTAGGAAATAGCTAGTCCCCAGTGATCCCGTTCCTCTTGTAACGTGTGGGAGGGCATTTCTTTTTTGGTA	11
gen_1414	TCGTTATTGCGGGAATACGACGGAATATTTATTACGTCAATGATTACACTGTGGAGTCGGGCCTCGTTGGGTACACATTG	11
gen_1415	ATCCACACTCGAGCTAGCGGTTGATGGGGTGACCACAATTTGGGGTAGTGTAAGGCTCGGATTGGAGGGAAGGCTCCGTC	11
gen_1416	GATATCTCCCTGAGTTATTTGTAGGACTCGAGTTTTATTGGAGTCGATATATAAGAGTAGAATCGTTTCGGGCTTTAGAA	11
gen_1417	CAAGTGGCCTGCTCTGTATTCATTCATTGTTAACTGTAATTTGCGAGATAACTAGGCGGACATAATAAATCAACGATCTC	11
gen_1418	TCCTGGCCGACGGTTATAACCGTACTGAATGTATCGTGTTATGACTTCCGGGGTCCTATGACTATGAGCGATGGGGACTA	11
gen_1419	TCATTACTTTCTAATATCGTTTTACACAAGTAAATCAACGGCGGGGCGAGTCTCGGATGGTATTTGGGTGATGCCTACGA	11
gen_1420	ATGTAACATGCCTTCACGCTTCCCGGGTGGGCTACCGAACTTGAGCCATAAGCCTGCAACTAGGATACCAGAACTGCTAA	11
gen_1421	ACTGGTCGAGCCAGGTGTTTCAATTGCAATGAAGGGTGTTTAGATAGGTGATGCGACTCGCGAAGGCGCCACTCTTCGGT	11
gen_1422	GAACCGCCCATCCGAAGCAGGATTGATTTCTTTTGGACGTGGTACGAAGCCTAATACTCTTCAATCTGGTTCGCTTAGTA	11
gen_1423	TATTGGCGGGTGATTATCTTACGGAGAAATTAATGGAAGTTTAACCGACGTTGTTAATGGGAGACTAGACGAATTGTGTA	11
gen_1424	GGTAGTAGAGGGTTAAGGTGCGTTTTCGTGGGTAAGTTCCCCAGATTTTTGGTGGGTAATCTAAGTCCTGCATTTGCGTA	11
gen_1425	AGTTTTCCCCGTGGATGCTTGATATGCATTCTTCTGGCCATCTATTCTTGTCCTTTGCCCAAAATAAGTGCGTCTCCTAT	11
gen_1426	TTTGGTGTTGGTTAAGCCGGTTTCGGATTTGATGAATTTAGTGATTAAAGGCTGTTCTTTGGGCGTAGCAAGCGTTTCAC	11
gen_1427	TCAGATTGCGGTTCTGACCGGCTGCATCTTTTAGTCTCTCGATTTATGGTTAGCGCAGTGGAGGACCACAAAGGTTCAGA	11
gen_1428	TTAATCTCGATTCGGAACTTGATGGTCTCTTATGGGGCATGTGGGTTCTTCGTCGGTGTATTTGCGATCTCCGGGGTTGA	11
gen_1429	AAGTGTGCGCTGCTGGGTTCGTCCCATGTGTCAAAGTTTGCGTGATGTAACTGCTGGTGGGTGGTACCCTGGGGTTCCCA	11
gen_1430	GCCTCGGAACGGTTTTGTGGGCTTTCACTTGTGGAAGTTTAGACGATGGAGGTCTAATCTTTATATTTTGATATCGAGGA	11
gen_1431	TAAGGGGGATAAATGGCCTTGGTCTACAAGGGTCTTCGAAGTCGTGGTCTAGGTACCGAGCTCGCAGGGGCTGGGACCGC	11
gen_1432	GCAATGCTTTCGGGTTTCTAGATTTTGGGTCGGGTGTGGTGTGACAGTACGATAGGATGCTGGACTACCTGGGTCTGTTG	11
gen_1433	TGTTCCCCTCATAGGGTTGCTATCTAGTAAACCCCGATGTGGGATTCATCACGTTTCCGGGGTCAACACCATTCTTTTGA	11
gen_1434	TCTGTATGTTCATGGTATGTTGAGTGTATCTGCCGGACAGCGGATTGCTCTGCTTACGGAGATCGGGGATCGTTTGCGTA	11
gen_1435	TCATACTACGTGGGTCCTTGCCTACAATACGACTGAGGAGGTATGTCCCCAAAAGCTGGTGCCAAACGAGAGCGACAAGC	11
gen_1436	GATTGTATTCTGTAGAGATTAACTGTACTTTATTTACCGTCGGTAGTGGCAAGGCTATTGTATCTCTCGGCAGGCTCGGT	11
gen_1437	TTATAATGTGCGGATTTACCTGTCGGATCCAAATACTAACGATGGTTCGATCGTTGCGGTGGTCGGTATCCCGTATGGCA	11
gen_1438	CTTCGTTGCGTGCCGGCGTTGCATGTAACAACATTAGGTCGATCTGGTTAAACTGTTTTTAGAGATAGTAAGGTCCGTTT	11
gen_1439	CAGGTAGACATAAAAGTGTGCATAAAATCCGGCAATGGAATTTGAATTGTGGGATAGCGCTTCTGAGTTCCGACTTGTGA	11
gen_1440	TTCTCTGAGTTAGGGGTGTTCGACTCCACAACTAATAACTTTTGTCATCTCAGGACGATGTAAGAATTTTGTTAGCGGGT	11
gen_1441	TGTTAGCGTTTCCATTTCATTAAAAGATTCTCGGCCAGATTGGTTCCGGATATAGATTAGGTTCCCTTTGAGCAATTCTT	11
gen_1442	TTATTTGCGAAGGGGTTTCACTGGGTCTCGTCTTGGTCGGAATCCTGGCCAAGGGAATTGAACTCCCATCGCATTATGGT	11
gen_1443	TTTGCATGTTTGCTTCGTCTATTCTTATATTCATTTCTGCTGCATGTAATATGTCTGCTTCGTAAATAGCGTGATCAATT	11
gen_1444	GTTGAAACTTGCTGTTGGTATCTCCAGCGAACATTATGAGCCGTTTTGGCTGGGGAGGGTTCGTGTTGGGGATATGGATG	11
gen_1445	TGTGTTCTAAGAAAATCGAGCAAGAACTGCTAGTTCTTTACAGGGAAATTTCTTGTGTTTAGTTTCCGTAGGTCCTTGTA	11
gen_1446	ATGCAAATTGGGTCGACCGGGGTAATAAGGGTCGAAGAATGTCAGAACGTCATTCACCGTCACCAGTTGAGGCGAAACTA	11
gen_1447	TTTCTAAGAGTATGTGACACAGTTATCCTTTATACTGATCCCGGAGTGGAAACTGAAAATTTCCGTTAAATATATCATAA	11
gen_1448	CAACTTTAGATCCAGGTGTTATGTCGACGATGATCCCCCACCATTAATGAGATGCTATGGCTTACGAGATCTTTCTTCGA	11
gen_1449	TGGTCGCATGAGATAGCCTGTAATTAACGTTGCGATCGATAAGAATCGGCGTCGATGGCATTTTTTTTTAAGGGTTTTTG	11
gen_1450	ACTTCATTGTAGCGCTGTGATTTATTGTGGCTGTTCGATGCGTCAACTCAGAACGTCCCGTCATTCTTGTAGCGAGTTGT	11
gen_1451	CAACGAGCGTTATTGCGACATTAGGCTTTTGCTCATCAAGAAAGTCACTCCAGGATCTTCGCGGCAATGGCCCCGTTCCA	11
gen_1452	TAGGCTTCCGTAGGTTTTTTGAAGATTAGTGCAACAATTTTCGAGCTGATCGCGGTTCCAGGTGTGTCAGGGTGGCTCAC	11
gen_1453	TAATTGGAGCAAGCAGATTGTTCAATTGCTCCCGAGCCCATATTATTTTTTTTTGACTGAGTGTTTCGTTTTGTGGACTT	11
gen_1454	CTTGTACGTGCGGATAGTCGGCAGATAAGCTGCTTTCGTTAGGGATTTAAATATCGTGAATAATTGATAATACTACCACT	11
gen_1455	TGATTGACGTAACGGATTAGGCACGTTTAGTAGATCTACTTCTTGAAGCCCCGACTCTAGTTCGTAGTAGCCTGAATTAT	11
gen_1456	GGTGTCATGTAATTATTCCTGTGCTAGCGCAACTGCTTTTATTTCAGTATCTGGAGCTGTTCTCGTTGCGAGCGTTCGAG	11
gen_1457	TGCGTGTTATTATAGTACGATGTTGGGCATTAGGCGCGACGTATTTTTACGAGGTTCAAAGTCAAATAGATGAAGGACGT	11
gen_1458	TGTTGTTGGAATGACGAGTCGTATTATGCGATTGGTCGGACGTATGGTCTTAAAACCCCTGTGTAATTCAAGGCCTAGTG	11
gen_1459	ATAAGTCATTACTCAGATCGGTCGAATCCATGCCCAGTGCGTTTCTTGAGCTCTTAACCCAGTTTACCGGGGCGCTACGT	11
gen_1460	GACGCCTATTTCTGGAGAATTTTCGAGAAGTGGTTACGAATCAGTAGTGGAGGTCACTACAGGTTCCATAATATTGACTC	11
gen_1461	TATATAATCGCTAAGCTTTGGGCTATTACATGTTAGGTTCTTATAGCCTGTTTAGTGATGTAACTGGCAGATCAACGATT	11
gen_1462	TAATGACCAATAGGCGTAGTGGTCTAAAAATTAGTACTTTTCAATGTCAACCTCGTCGGCGTAGTAGTCTTGTGAGTGAG	11
gen_1463	AGGTCCGGTCGGTAGTTCGTGTATTTTGTAAGGTTTTGGCGATATCGTTCCTTTGTTACCTGTCCTACAAAGTAGGCGAA	11
gen_1464	TAGTGTAAGTGTGGTCCTTTAGGAATACGTGCGAGAACGCCGATCAGGCTTATTCTAGAGAAGCGGAAGTGATGCGGTCT	11
gen_1465	TTCTTCGGTTCCGTGTATGGTGTGGTGGTTCCTGTTCTATACGGTTACGTCAAATTCTGATTTGTTTTGTGATGGTATGA	11
gen_1466	ATCCTACCAGCGTTTATTTTTAGGCTCTGGTCGGCAATAGTGGTTCTGTGTGACCTGAATTATTGTCCGTGTTCATGTAA	11
gen_1467	TTCTGCGTTTGCACTAATTCATTACAAGAGAAGGAATCTTGATCAACTTAATCGGCGTGCGAGGAGGTGGCGGATCCGAC	11
gen_1468	TGTTCTGAACTGAGGTGCATAAAGGTTCAGGTTATTTGGCTTTTTAATGAGGCCCGCTGTGGGAGTATGCCTGGGGCTCG	11
gen_1469	GGGTAGTGTTAATAGGGTTTCTTATTGCATTTATCCTTTTCTATTAAGCTTTTGACAATGCGCAAAGTCGTTGCTACAGT	11
gen_1470	TCATCTTCCTGGGTGCGAAGCATCTCTCTTTCCATCGGAAAGTCAGTGGTACCCTTCCAGGCTAAATATCAAGACTACTA	11
gen_1471	TCTCTACCGCAATGGGTAAGAGGCTGAGTGTGCATGTTTGTTCGTGAGACGCCGAAGGGTGAGTCAGTCTGGCTCTATGT	11
gen_1472	TGTGAAGGTAGCAGTCCGTGCCCAGGGTTTGTACTTGTTCATGAAATGGTCATGATAATTACGGGTATGGTCTCCCGCAC	11
gen_1473	TGTCCGAGACAGTATGGACCTTGGATAGTTTAAAAAGTTCAGGTTCTATTTGTTTATAGGCTGCCACTACTTCTCAGTTC	11
gen_1474	CGATGTCGACATCAGACGAATGGGGCCTTGAAATTTAATCTGTTGAGGTTCAAGGACCAGGAAATGAAAGGGCGCTGCTG	11
gen_1475	TGTAGCGAAAGTGACTATCGTAGTGTGGTCAGTGGGCGGTGAACAGCCTGCCGCCCACGGACGGCGACGGGTTCAGTAGT	11
gen_1476	CTCGGTTTAAACTCGGTTATCGTATATGTACACGCTCAGGGGGTGTAGTTTAGTACATATTACTTAGCTGGGTGGACGCT	11
gen_1477	CATATGGGGGATTCAGTCTGTATTAAGACTGATGGGGTTTTCAGGGAGTCAGCTTTCGTCCACGATATAGATACGTTTTG	11
gen_1478	TATCATGCGCTGGGCATATCACCTTTGCCTGGTGAATCTATGCCATATCGAGCGGATTGGGATCATGACAAGGACGCGCT	11
gen_1479	TGCGTTCAACTGGGATTCCGTTGTGGAATTCTATAGTACACGTACTGGAAGCCGTAGCGTGTACGCATCGCCAGCCTAGC	11
gen_1480	CGCATGGCTTACTGGTTTTCGGTGGAAGCATTCAGTTATCTCGAATTGAGGTCCATCTCGGCTGTCTTGAGACGTAGGTT	11
gen_1481	CTTACGCGAGCTTACTATATTTAACGATCGACTCTGGTAATTCAATCATTTCCTTGATTGTTTCGATTGTGACTAGGTGA	11
gen_1482	TTGCCTGGGGTGTGTCCCTGTATAGTTAATTGTTGCTAGTTTTCTTTGGGCCGAGAAGGGTACTTCTACTTACGTTAACA	11
gen_1483	TAGTATTACTCTTAGTTAATCAAAGGTCTTCGGAGCTCGGGTTCAGCCAATGCGTGTCGTTTTAACACCGTATTCCCCTT	11
gen_1484	TGTAAGGCTTTCTACGCCGTTATTGACTGCCTACTGCGCATGTTGGGGCGTGTAGCTTTATGGAGGAAGAGGCGGCAGGT	11
gen_1485	CCTTTGAGCAGATCTCATCTGTTCTCACTCAAACTCTATATACCAAGCCATAGCCTACGCTTTGTCTCACGCCGGGGAAA	11
gen_1486	TTTGAGTTGGCCATTTTTTGGACCTGTACGAAAACTCCTAGGCAGTGCCTACGATATAACACCCTTGTATACTAAGTTGA	11
gen_1487	TTCTGTCATGGCTACCATGGAGTTCACGTCTCCGTGCTCGATATCTTGGTTCGTCGTTATGGCGTTCTCCCCTTACGCAT	11
gen_1488	CTTAGGTAGTGTGTAACATAATCTGTCCTTCCTGATTTACTTGGCTGTTATCAGACTTGCCGGATCAATAGGCGTTTCGG	11
gen_1489	TGTGTATCCTTTTCTGTCGGTTATCACCATTTTTAAAGTCCAACGAATCTATCCATCCGAGACCCGGGCTATACTAATCT	11
gen_1490	CAAAACTCCGAATGTAATATTTGGCTTTGGCGCTTCACATTTTTGATCCTCGAATGCAGCGTTGCTGGGCTAGATGTAAC	11
gen_1491	TGGCTCTACTCAGTTTCTTTGTAAGCTCCTTAGTTCAGCATTCATCCCTGACATAAATGGTTTCGGGTGCGGTCACTCAA	11
gen_1492	TGCACACTTACTATCCATCTCACTATCGTATCGGAATGATACGATCCCGCGGTTCAATCTGGAAGCTTTTAGCGATCGTA	11
gen_1493	GCAGGGGAACTCACGATTCATTATTTCGTATCTCGCCAGCCAGAATTAAATCTCCGAAGGCTGACATGCTGATTGGGTTG	11
gen_1494	ATGGATGTGAAACTCGGTCGAGGTGGACCTGACCTGCGTTGGTGCGGTTACTACTTTATAATGGTGAAGCCGATATGTGC	11
gen_1495	TACTAAATTAATGCTTTGTGGGACCAGTTGTATAATCGGTACAGAGATGGTCCGCGCCACAGACATACTGTTCTGGAAGA	11
gen_1496	ATCTGACTATGCATAATGGCATGTCTCGGCAATTCTCACGCACCGAGAGTACATTTTATCTAACTTATCTGAGCTATTTT	11
gen_1497	GTATATGAACTTAATTGTTTATTGGGAAAGATGTTATGCTCGGGTATGGGCGAAGTTTGATTAAATTATGTTCTGTCGCA	11
gen_1498	CATTGGTTGGGTGGGACGGTGGTGGGTCTGATTTTTCGTTGATGGGAGGATTCTGGTAATTTTAACCAAGATACTAGGTC	11
gen_1499	TTAGAGCGTTGTGTGGTATGTTCGATATACCTTTCATTTCAGATATTGAGACCCGGTACTGTAGATTCTGAAGCGGCGCT	11
gen_1500	GGAGTGTAATTTCATTGGGCCTTGGTTGTTACGCGATATAGTGGTTGCGTCTTCCAAATGTTACTAAGCATCGAAGCAGG	11
gen_1501	ATTGAGTAGCGGCCTGCGTATAACCAGAACTGGAGGAGCGGATGGACACAGTGTCGATATCTGTGGGGGTAAGAGGTGTA	11
gen_1502	GCGGTTGCAACGGTGTCACCTCATCGATCTGCCTAGTATGGGCCTGTGGGGTATAGCGGCTGCCGGATTCATGGGTCTTA	11
gen_1503	TACATTTGGCTTCCTGGGTCCAGGCATTAGTTATGTACTAATTCTTTGGGAAGAAGCGGGAGTTTTATACTCGGGTGCCA	11
gen_1504	AGAACGCTTAGTGTTCTTTGGGATTTCCGAGTTGTCTTCACCTCTTCACCGTCTGTCGTCGCTAATCCTCAGGAATATTT	11
gen_1505	ATTTTCAGTAATTGGTGCTCTTTGAACCGCTTGAAGCACTATCGCTTGTACCCGAGGCCACGGCAGTTGATGGGCGGTGT	11
gen_1506	TGTGGCAGAACCGAACTTCTCTTTCAGCGAATTGCTTTAAAATGTTGTTGACGATTTTAGGTAAGGCTGAATGCGACACA	11
gen_1507	TCTATGGTCGCAGAAGTAGGTTAGTAATCTATTGTGCGGTTTACCGTGTCATTGGGTAGAGGCGAGAGAGGTTGTTCGGA	11
gen_1508	TACTATAATTTTACTGGAGTTAAATGGGGATGACGGATGCATAATATAAGGAATCCATGTACTCTCGTTCGGGGGTCTCG	11
gen_1509	CCAGCCTCTCCGGTGTGTTCAACGTTAAAACTTTCTAGGTTTAAGTTGGTGCAGACACGGGATTGGCGTGCCACCAGCTA	11
gen_1510	TGCACATCGGCTCGTCAAGATCATGGTGCCTTGGCTTGCGGAGGTGCTGGAGTACAGGTCGAACTCGAAGTGTGGCTGGA	11
gen_1511	TCTAGCACTGTTCAAGAGTGTGGCTAAATTTGCTTTCCTTAAAGATATTTTTGGCGCTCATTTACTCGTTGGTGCACCGA	11
gen_1512	TTTGAATATCGGGATGTAAATTTTCTTTTGACAGTAGTCTTTCTTGTCCTTAGGGGTTTGGCACAGGTGGTTGGATGTGA	11
gen_1513	TTCTCATATAAGGACGCCATGTCTAGGAGCAGCTTAAGCCATGCCGGGCGAATACGTGACAAAGCATGTCGAGGGAAATT	11
gen_1514	ATTTGATTTACGAGGTGAGTATCAGGCCGACAATTTGTTGGGGTGCTCATGGTATGGTGTGCCGTTGAAGGTGGGCGATA	11
gen_1515	GAATTGTATACCTTCTCGTGTATCTAAATCTGTGTATTTCGTTCTTGTCAGTTGCTGACAGAGATCCCACCGCGATATAA	11
gen_1516	TATCGGCCGGATTCTTATGAATGCTATTTGCGTTTTAGAACCAGTTCCCTACACAAGCACCCATATCAAGCCAGTTGTGA	11
gen_1517	ATCCTTGTCGTATCGAGTGGCGGGGTATATGTGTAGTCAATTTGGCGTGTAGTTGGAATTCATTGTTAGAGGCTTCTGAA	11
gen_1518	AGCGTACCGTAGCATTATGTACATAGATCTTGTAGTCCAGTACTTATGGTAATTTGAAGGTATAATCCTGCTTGTAGTCA	11
gen_1519	ACCTATGTTTTTGTCGAAGTCGTCGGATCGACGAAGTTTCAATTTGTAAATTACATTACGTTGCAGGGATAGGTCATCGA	11
gen_1520	GACTATCGTAAAAGCTCACCGATGCCTTTATATTGGCTCTATCTTTGCGAACGTGTCAACGTGGAGTCCAGCCCCTCGGA	11
gen_1521	TTAGAGTATCTGGATGACTTTACGAATGGGAGAGAAAACTGATTCGTGGATATCAAGTCGCCCGTCTCTGTATCGTCCGA	11
gen_1522	AGGTTTGCGGTCGTAAAATGTTTTGTTGTATCGCTCCTGGAACGATGCTAGCCCCTGGCTTACTTTGGTTTCTGTGGGGA	11
gen_1523	TTCAATTGTGCCTCAATCTTATCTTTTCCGAAGTGTCGGTTATCGTGTCAAATCTCTTATTGATTTGGGATGACTCGTGA	11
gen_1524	GTGCCTAATCTGGGTGTCCATGTTACATTAATAGGAGGGGATGTGGGGTTTAAGTGGTCAGGGACCCTTGGCGGCGCATA	11
gen_1525	TGCTAGTTCTACTGATGCTAGTCTGTATTGGTAAAAAGTTATTTTGCGGTCCAGGTCTGCCACTCAAAAGCCGACGTATC	11
gen_1526	CAGAAGCGGTCCCGGTGTAGCAGGGTGGTTAGCTTTGTCATTTGGGTCAGAGTAGAGTGGCGTAGAGTCGATTAGATGTA	11
gen_1527	ACTTGCGGTGGAAGACAATCTGTGTCAAGTCGCGGCTTTGAAGACCTCACTTGATTATCCAATGATAAGGGTAAGGTAGA	11
gen_1528	ATACGTAAAATATGAACGGGGGGTGATTTTATAGTATCGTGTGGATATCGGCGAGCATTTAGAGTTATGGGCATCACGAG	11
gen_1529	GGTGGATGAGTACAGGACGCCCTGGCCCATATGTCGCACCCCTAGGTCCACGAAGGATCGAACCGTAGCGTCGTTTGGGA	11
gen_1530	TCTGACTTGACGTGGGATGGCCCATTAGGCGTTTGTGGGCTACTTGGAGGGCATGCTGACAGGTCATTTGCGGGCTGGGT	11
gen_1531	AAATTGATTGTAACGTCGTGTAGTACTTAAGTGAGTTGGTTAAGTTTCGGATAAGGTCCGAGCAGATTGTGACGGGGTTC	11
gen_1532	ATTAGGCTGTGGAGTAGCGACGGAATGGGATCCCCATGAATCGTGGACTGGCCCGAGTCTAACTATGGTACCGGGGCCAG	11
gen_1533	TGCGTGGGGAAGACCATGTTCGAGCTCATACTGTGGTCATAGTTTAGGGGTTCCTCAGGAGCAATTGGTCGTGTGCGCCT	11
gen_1534	GTAGCTGTGTTAGCGCCCTTATAGTATCGAGGATTTTTCTGTCTTATGTTGGGTGCATCAACCCAGGCATAAGGAACCTT	11
gen_1535	TAACCTCTGGCAGTATGCCTGTTCTTGGCTAGCCATCGCGATCCTTAGGGTAGAATAAGGCCGTGTTATCGGCATTCAAT	11
gen_1536	TCACGTGCCAGTGGGAGGGACTTGGCCCAATTCTGACTGCTGAATCGAGGCCGATTGGGCGGCAAGTCCAACGGGTGCAA	11
gen_1537	AACTGGTGTTTGCGTTTCGTCTTCTGGGTTCCTACTCTCTTAATCTCCTGTGGGTTGTGCTCTGAGTTAGGTACCCGACT	11
gen_1538	ATTCAGGGAGGTGTCAATAAGTGAGATTATAGATTATGGGCACAAACACGTAAATGTTCGGGGGCGTGCCTGACTCGCCA	11
gen_1539	CTAACCCTTGAGGTCCGAGTCCTCTGAATGCATTTTACTTAGCCTAGAAGCCTGGCAACGCTTTTTGTGGGTTTGCATGA	11
gen_1540	AACTACTGTTATGAAGCGATCATCGAACGTGTGGCCCTTTTGAATGAAGTGGATTATCAGCGTTACTTAGTTACCCAGTT	11
gen_1541	TGAGCTAAAGCGTTGTTGCCGTTTTCACGGTTATGTAACCAAGGGTCTGACGGCCAAGATAGGTAGGTACTACCAGGTGG	11
gen_1542	ATCTGGTAAGGCTGAGGGTGGCTTTCCCGGTGGTGTTAGTGTATAGTGCGAAGTTGCGTTCCCGAGGTAGGACCATAGCT	11
gen_1543	GATTATAGTGGTGTAGCGGTACCTTATACTTATCTCCTTTCTTGTAGAGCTTTTCGTGCAGACACAGGGATTTCGTTAGG	11
gen_1544	AATGGGTGTTGGGCAGGTCGGGTAGTATTGTTCACTGGCTTGGTTAGGATGGGCTGTTCAGCTCAAGAATGTCCTCTTAT	11
gen_1545	GATCCCGCTGATTCTTTATCTGTTGTATGGAAGATTTATCCGCTGTTCTTAAGTCCCTACTTCCGGAAATGAGATAATGT	11
gen_1546	AGATAGTTTATCTCTAGTTAGTTGCGCGGGTTTCAAATCCCTCTCAGTTGATTCAATGTATGAGTACTGTGTGCGCCTTA	11
gen_1547	AAGTATTGTGTGCTACCGTCACCCTATCCTTTGCTATTTGGTCTGTCATCTTTCGGTTGGTTTGTTAGCTTTCAGGCACG	11
gen_1548	GTTTCGAAACATACTTCATAGGTTGTATCTGGGCCACTGCCCCTGTGTTCGTAAGGGTGTAGGCACCGCCACTGAGGCAA	11
gen_1549	TCCTGGATTGGTTTCATTCAACCGCCGACCGGGCCAGGTGAGGTACAGATAAACTCTGCCATTTTGTAAGTCGTCAGTTT	11
gen_1550	AGTGTGTTGTACTGGCTGTTGTGCCGCCCTAGAAATTAAATATTAAACGCATATTGGGCTTTGTTAGGTTACATATCGCA	11
gen_1551	TGTGAAGACATTCGTTACTTGTTCGGGCGGGCCCCTTAACCGCTAGGCCAGTTCAGGTACGACATCAATGGGTTGGGTCA	11
gen_1552	AGGGTCTCAGGGCTAATGCCGTACTTGGGGGCCAACGCTCTACTAAACGGTTTTGTGGTTACGGAAGATGAGTGCGACAA	11
gen_1553	ATTTTCTGGGTGTCGTTTGCTTGGGAATTCGAAATTGATTGGGATTAGTCGAGAAAGCAAAGGGTGACATCCTATATTTA	11
gen_1554	ACAGCGAGCTTAAACGTTATTGCAAGGTGGCGCGGTAGTCCTGGCGTATTATGTCGCTCGTGCATTCTAGGCATAGGGTA	11
gen_1555	GGGTATAATAGAAATCAGTAGTTCTATGGGTAACGCACAGATGCTTTTCTAACTTATCCAACTAGTACTTCTTCCGCACC	11
gen_1556	TTTCTGTGGTATGACTTGTGCGGTGTTTACTCGCTGATCTGACACTCGGGAGGATACTAAGGTCAACGGAAGGTCGCTAG	11
gen_1557	TTAACTTAATGGTATAGCGTAACGAAGTTTCTTAACATGAAATTACGTCATCGGCCAGCTGTTTTTCTTGATTGATAAGA	11
gen_1558	TCATGGACTGTTATTAAATAAGGTTCGGCTAATATCTTTCTTTTATGGCATTTTAAGGCCTGGTAGCAATAACCGTGACG	11
gen_1559	AGCTCCGGGTGTTTAGCTGGTTTAGTCAGGTCGAACTAAACAGAATATAATTAGGTTTCAAAATTGTAACAGAATATACA	11
gen_1560	ACGGCTCAGCAGATACGGTGCAGTAGTTGGTACCCTCCGTCAATCGGTCCAGACGAGGGACCAGCAGAAGTGCAGTCGCA	11
gen_1561	GGTAATCCTCATAGCGACTGCCCATTCACGCAATTATGTGGATGCTTTCGCACGTTTTTAGTTCGGGAGTATTTCTTGGA	11
gen_1562	TTATTTAGTCTTATTTTTACCTTCCACCAAACAAGGAGGTCGTACAGTCTGCGCCACGACTGTTAGATTAGGTGGCGGGA	11
gen_1563	GGTTAGCGAACTGGTGTTCAGCAGCCCGGTGGTCTCCTGACGAAGAACTCCATGGTGGAAGTGATGGATATCCATATTAG	11
gen_1564	TAGGGGAATCAGTACTACCATTGTTAACACATTTTTGCCCGGGCCTAGATATAACTGGTTATATTATAATGCGGGGGCAT	11
gen_1565	TCAAATGTCAACCGAGGTAGCCGATGCGACTCTAAACTCATGAGACAGTTCGAGTACGCTAGACCCTGAGTGGAGGGTGC	11
gen_1566	CTGTGCCTCTAGGGTGCGTTGGGTTTTCGATGCAATCTGAGTACACAGACTCGAGCTATTTGAATGGACAAGCTTGACTA	11
gen_1567	ATAGTTGAACATCTGATTAAGTTTCTCTTGCGGGTGTTACTCCAGGCCGGCCTTCAAGTGGTTTAAGCGAGGTACAATCA	11
gen_1568	AAGTTGCGAGAGATTTGAATTGATCCATGCGGGAATGAAGGCGACAGGACATGTGTATGTGATGGTTGGCCGACGGGGGA	11
gen_1569	GTCTGTTTCCTGGCGAGCGAGTCGAAGTTGTGAAGGGCCAGGTGCTACTGGTCTGTGTGGGGCGACTGGACGATTGCTGA	11
gen_1570	CGATTGGATGTTCGACTCTCCCGTGTGGCAGTGAGACTTTGTGAAAGGCTCGATTAGGTCGATTGTAAATCATACGGATA	11
gen_1571	TCGCTTGACTAGAACCGTATACCGTCTGACCACTGCGTAGGGGTGCCTCGAACTACTGTTAAGAGTTCCCATCGGCTTGA	11
gen_1572	TTATGCGCATCGGTGCCAAGGGATATCAAACGAGTCTTGGTCATGGTCGATTGCTTTAGTAACATTGCAGTTTGTCGTGC	11
gen_1573	CAATTTTTCAAATCATAGTAGTTCTGAGTGGAATGGGGTCAAGGGACGACCCGTCGAATCGGCAATACGTTCATTCCAGA	11
gen_1574	ACATCCTTTAGATAAGACGTTGTGGGAGCCTGGAAAGCTGCATGAGTAGTGGGCCGGGTCCTCGTAGTGGCAAGGTCTGA	11
gen_1575	TCGATAGGTCGCAATCATGTGTATGACGCTCCTGACATATTGATGGAATTGTTTGATTTTATTTAAGTGGTATTCCGCAT	11
gen_1576	CTTGTTTGCTAAGTTAACTTATCTTTAACCAGATTCCTGGACTGTGCATGTATCTTATTTTTTGAGCATGAATCCGTGCA	11
gen_1577	GCCTAGCAGTATAGCACGGAGCACTGATCTTGAACTATTTAATGGTGTAGTCAAAAATGTTGTCAAAGGCTTGTCTCAAA	11
gen_1578	TCAGAATTTGATCGTTCTTGCCGATGTGTGTACCTCGGATTGGCTTACAGTTTGCAGCGTTTTTTGAACTTTATGTTTGT	11
gen_1579	GGTTACATTCGGAACAAGGTGGTAGTATACGAGGGTCAGAAGGTATCAGTACCTTCGGGGATCGAATCACGGCGGCTCTG	11
gen_1580	TTCGTATAGGCCCGAAATAGTGGCATTTGTTCAGGCAGGACTGTACCTTTCATTTGCATCCGGCGATATTGTGATTTGGA	11
gen_1581	GACTTGATGTATTATGTATAATTTTATGTGGACGCACTCAATTTTTGTGATACATGAGTAGGGGGTTCGTTGTATAGGTA	11
gen_1582	TTAACGATATGAGTGCAGTGTCCTTCGTTCTCGATGCACTCGGAGTCCCGCAGATCCCTGAGATGAGGGAAGTCTCCGGA	11
gen_1583	TTAAACATATCTAGTGAATACGAGGGCCCTCCTTTCAAAATGGTCTGGGCGGGGCATTCATTGAGGACGAAGGTAAAGGC	11
gen_1584	CCTACTGAATATGAATTTAGATGGGGGCATGGGATACGTTCGGCATGTCGTCAGGGCTGTGTGTCCGTGGTTCCTCATGA	11
gen_1585	TGCTGAGCAGGGCAGTATACCTGCGTTAGGCTCGACCTGTGAGAGTTCCGACATATTCCGATCTTAGGTATGTCATTTTC	11
gen_1586	TTACATATTGCTGACTCGTATTACTCGATCTCGTAATTTGGACATGAAAACGGGTCCATGCTATCGAGTGCAGAACCGTC	11
gen_1587	GGCAGGCCTGGTCGCCTAACATACAAATGCGTGGCTTTGTTGAAAGGGCTTAAATCTGGTGAATGTTCACCCTGAGCTGC	11
gen_1588	CTAAGTAAACGCGGGTTTTGGCTAACGTAGATGCTAGGCTTGGGCCCTACCGGTCCTCTTTTTGTATGTCACAATAGATC	11
gen_1589	GATTAATTGCTACTTTACGAGAGAGACACCGGACTGTACAAGGTTTACCAGTTCCCAGTACGCCAATCCATAGCCTTGCG	11
gen_1590	ATTATGCATGAGAAGGGAGGTCTAACTTGCTGATTACCATCCTCATCCTGTTGACGGGGTGAGTCTTTTCGGGCGGCTCT	11
gen_1591	CGTATTATTGTTTTTGTAATTTCATGATTTCAGTCTAGTAGTTCCGCTTTTGTTCAGCGGTGAGATCTGTACGACTGTAT	11
gen_1592	TGTCGTTCCGGTATGACCTGTCACTGTTGATCTAGTAGCGCCCTCTTGGTGCGGTGGTAAGTTCGATTCGAACGTCTCAT	11
gen_1593	GAGCAGGCGTTTGTACTGTGAACTTTGTTTGTTGGTTTTTTGTACCTTAGGCGGTTGTCCCACTCTAAGAGATAGTCAGA	11
gen_1594	CATCCGACTTGATAGTCTTTTGTGACGATCGGTTGGGCCTATGTCACCATTTCTGCCTCCTTCACTTGTTCAAACCGTGC	11
gen_1595	TCATGGTGGGTTACTTAGTTTCCACAGTTTATGGCTGGCGTTCTTGTAGGATTTGATTGGCTATTAGTTAGGTCATGTTA	11
gen_1596	GTCTTATAAGGCTTAGCGGTGCATGGATGGGGAGCCAGGCTTGCGATGACGGGAGCAGTCTTATTCGGGTGAGCCCCTAA	11
gen_1597	TCAGTATTATGACTTTTCAAAAGTTATAGGGTACGACTTGCCTTGATCGTCGGTCTTCCCCCCCATCATTAGACGCACGA	11
gen_1598	GATTAGAACTTAGACTATTTATAAGTGAGTGCTTGGATGGTACTTATTGAGGAGACCCCAGACGACACGTGTTTACGGGG	11
gen_1599	GAGCTGGCGGTGCGTAGGGTCTGGCGATACTGTTATAGGCTTGAAGATTATTATGGTCATGCCCCGCGTATTCAGAGGGA	11
gen_1600	TAGATATTTGGAATGCCGGATTTGGGCTCGCTGTGTGTTGAGTGTCACATCCTCCACGCTTCTGCACCTTGTTAGCAAGA	11
gen_1601	TTCCTAGTCCATGGGCCTTTTGTCCCACTGCAGGCTTTATCTTTAACTTGGTTGGGAAGGTTCGATGTTAGCGCGGGTGT	11
gen_1602	GTAGCAGGCTCTATCTGTTCAGGCTGGGCGCCGTAATGATGTCACTATACCGCATGGGGGGTAAGGTAGGAAGCTGGCGA	11
gen_1603	TACGTGTTGACTTGTTTTGCATGAGCTGCTAGCAGTCACTTGGTTGGGGGTTCATCCGGTCCCGGAAGGGCTTGTGGGGC	11
gen_1604	GCGAGTAGTTACTAGATGCCTTGTCGTGCGGCTGGCGGATAACACCAGCTAAACGGTTGGGATAAGAAGAGTTTCGTCAA	11
gen_1605	GTTCTTCTCTAGTAGTTATTGTTAACTATCAAATCTGGAAATTACTTCTCCGCGTGTTCACCGCCTATGTTTGCGTGGGC	11
gen_1606	TCTTGTCTCGATGCCCAATTATAGGCGTTTTCTGGGACGAGGTCATTGTCTGAGTTATGACATGTCAGCGGATGTTAATC	11
gen_1607	TGTGGAAGGTTTGTCGTTGTACCAGTAATTGAGATCTCAGGATTTCGGTCGCCAATTCTGCTTGTCGTTCGCTCTTGATG	11
gen_1608	TTTTCCACACTCATGCATTCATTAATGTCTTTAATGTTCGATAGAGTTATGGGCAGTTCTCGTCAGGCGCCACGTCTTCC	11
gen_1609	TATTTCCTTCATGATTGTAAGACCCGAATTTGGTAATGTCGCAGTAGCGTAAATACCTCTCTCGAGATTAACCCGATGCT	11
gen_1610	TGTCGGAGTTGAGGGACAGGGTGGACGCCAGTCGAGAGGTAATGCGGTAGACCGGGATGAGGTCGGGAGTAGTGTTGCGT	11
gen_1611	AAAGTATTGATGTCGGCGGGTGTCGAAAAACCTGTTTCTGTAATGCTTCAGTGTGGGTTTGTTCTCTCCTCCCATGGTTC	11
gen_1612	AACTCAAATCTGTTTCCTAGGTTTACAGGTCGCATCCGCACATGTTATGTCGCTCTACGGGATACGGGGGTAGATAATCA	11
gen_1613	GTCTTTTTGTAGTTTCTGTTGGTCACACGTGAAAGGGATTCGAGCCTCTCGTATCCGTTTCACATCATGGTCCCTTCCCA	11
gen_1614	GTTCCACAAGGGGCTCGCTCTTCATAAGTTGGGATATCGTATCATGGGGTTAAGCGGGTCTCTCATGAAATGGTGGCGTC	11
gen_1615	ACTTATAAACATTTGTGCAAGACCATTTGAATCTGGACTGTTACTAAAAACCTTTTATGTACTTTAGAAGCGGGCTTGCG	11
gen_1616	TGTTACTTGTTTAGGGATGTAGAAAGCGGTCGGTGTGTACTTTACGTGAGAGGTCAGGCGTGTCTCACGAGATTTAGTAT	11
gen_1617	CAGCAACCCCAGACCCGCTCAGGTTATTCCACAGTTTTTACTCGAATCGGTGTCTATTTCGACCTCGAGAGGTGTTTTTT	11
gen_1618	TAATGGTTCTCTGTTTGCTCATGTTTCGGCCGTTTTGCCCAAGTCGGCCATCGCATAACGGTAAGGAAGATCCATGGGAT	11
gen_1619	TTATCATTTAATAAGCCCCGAGGAAAACTGGTGTTCTTTAAGGGCACTGCGAGGGAGGGTGGCGTGAGGTGCCATTAGTA	11
gen_1620	GAAGCGCGTGATATCGAATGTATTTGACACTACCGATATGATTGATAGTAGACCTTATGCCTGGCGACACGAACAGGGGA	11
gen_1621	TCTGTGTATTGCCGGATGGTTGTTATCCTTACGACACCGGGTGTACCATGGTCCCGCAACGATTATGAGCCATGGCTTCC	11
gen_1622	TGTGTACAGGTTGTCCCCGCCTCTTAGTGCATAGTGGCATTGTTAAATACGTAGCTGAGATAGCAAAAACCTGTAAATAG	11
gen_1623	GTCAATACTAGCTTACAAGGCGCTGTGGTTTCGGGAAACACATGTTAATTTCGTGTCCACTAACGTTGGCCAACCATTGA	11
gen_1624	TTACTAAAGCCTTGGGACGCTTATTTTCGTGTGCACCTCATCTACCTTGTTAATTGATTGATCTCTGTGATACAATCTTT	11
gen_1625	TCGGAATGAAGTAGTTAAGCTGTCGTATGTGAGTGTGATTCGTCAACCCTCAGCGCATGCAGTAGGGGCAAAGTCTGTAG	11
gen_1626	ATACAATGTGATAATATTGTCCGGTCGTATTCGGGCTAAGGACTCTGGTTGTGGAGCCCCCTCTGTGAGGCTGGACAATG	11
gen_1627	TAGATTGGTTCCGATGTGTGCCTAATAAGCAATGTTTCATTTCCTAAATTGTAATGTGGGATACGTTGCGTCATATACAC	11
gen_1628	CTAAAGCAGGTGATCTCTTGAGAGGGCATTCAGGACTATGCCGTGGCCTGCCTCAGATTTGGGCGTATATGAATAGTCTG	11
gen_1629	GAAGACTGGTGAGTATACAACTGTTACATTTTCGATTAGCATTTTGTTCTGATATTGCCTAGTGTGTCGTTGTCCGCTGG	11
gen_1630	TTAAACTGTCTCATCCGATAGAGATGCGAAAGAATTGGGACGTCTAGTTGACTCTGCTATGGATTACTATTTCCCGATTC	11
gen_1631	CAACTCCCGTATCGGTCCAGGCCATGCGACAGAAACTATGGCTGGGTCATCAAACTCAGGACAGGAGAACTAAGTAGTAT	11
gen_1632	AACGTGCTGCTTTTAGTCTGCAGCGCATCGCCGGGAAATGTACTTAAATGATAAGATAGGGTCAGAGTGAGACTTAGATC	11
gen_1633	TTGGACGTCGGTGGATGCTACATAACACCGTTGGAAAATTTGATTCACGAATGTGCTATATTCTAATAACTGGTGTGACA	11
gen_1634	TCTGAGTCTTGCAAATAGTAATCCGACCATTCGTTTTGAATCTACAGCGCGGTCTAGTCTTGTAGCTTAGAATTGAGGTT	11
gen_1635	TAATCCTGTTTTGACCACGGCGAGGCGTGTCCATCGGAGGCTGTGAAGAATTATAATATAATGGCTTCTAGGGTCTAAAC	11
gen_1636	TCGACCCTCCACCGGTTGTGTGTAATGTTCCGTCGAACGTAGACTTTAACACAGGTGGTGGGGCTTGGTGGAGTCATGAC	11
gen_1637	AGCTTGGGTTAAAGTTACCTATTGTCGATTGCGGTCGGACCTAAAAACATTAATAGTCTAGTTTTTTGTCGGTAGACTTT	11
gen_1638	TCTGTCTCTGCTCAGTCACTGAATAGGCTCGCAGTCACTTTCATGGAGGCGCCGATGCGATCTGGACCTGCATATTGCTT	11
gen_1639	TTTTATGTCACCATGCATTTGATCCTGCGTAGTCCAGTTCTTCGTACTCTGGCAATGTGGGTGCAGGATAACTCACTCGC	11
gen_1640	AGGGAGCTCCAGTTGCGTAGTTCTTCCGTCATGTGGAAGTTAGGACTAAAAGCGCCTTCGTTCGTAGCCACCTGCTTTTG	11
gen_1641	TCTGGAGCGAGGTCCCTTTTATAGGGGAGGGGTGACGGAGTAGTGGGTACATGTAGTGCTTGGTGGTTCTAGAAGACCGA	11
gen_1642	GATTGGTAGGGAGCGGTAGGTTAGGTTATTAGGTGTACACGCGACCATGGCGGGCAGATGTAAACAGGATAGTGGCTGTA	11
gen_1643	AGAAGACTCTTGGTGAGAAATGCGTCCCATTTAGAGGTGGAATTAAAATCTTAGCTCTACATGTCGAGGGCGGTCTCACG	11
gen_1644	GAGACGTGTATGATGGCGTTTGGTGGACTCTCCGATAGGGTAGTCAGCCGCCAGGGCCGGGCAGTTCTGGAGTGTTACCA	11
gen_1645	GCCGTTGCTTGGGGTTAGACTTGAGGAAGCTGGCTGGTGCGTGGGAGAATCCGTTTAATGGAAATGCAAATGATTTGGTA	11
gen_1646	CATCTAAGATTATCCGGCGATCAGGCAATGGGTGGAACGTCCTAATTGTCGTAGTCATCCACCACCATATTAATTTAGTG	11
gen_1647	CACAGTACTTAATGCTGGATCACGTAAACATCCTATTCGAGATCAGTAGCGTAGGAACAATGGAGCGCGTGCGGAATCGA	11
gen_1648	TCGTCTGCGCAGTCTTTGCCTTAAAGCTCTCCAGCGTGTTTGCATTTGTATGTACAAGGTGGACCCTCGGGCTATTGGAA	11
gen_1649	TCAGTCTGAACATTTACGGTTCTTGTTTTAGGTTGCTCGTAAAGTGGACCAGGAGAAGTTTTTGTTCGGTTTATTTTCTT	11
gen_1650	GCGTGGTTTTAGGGTTCACATACTTCTGGTTCTTTGTTATGCAAATTGGGTATCTGTATGTGTATTATCAATGAAGGTTG	11
gen_1651	AACAGGAATTATCCCAGACTTGAAATCAGACTTTGCGCGAGCTGTGCTGGAGATAGTATGGCGTTTTAGCCAAGCTCTCT	11
gen_1652	GTACAGGGGGCTTAACGAGTCAGAGTGTGCACGCCGGATTAATTAACCGCCCAAAAATTGCATTGGAGTTTTAAATTTGT	11
gen_1653	CCTTAGGTTCATAAATTCTGTTTTTTTATTCTTGGTTTCGTGTCTAAATGAATGTTAACAGGTCTCTGGGTTTCTAAGAC	11
gen_1654	CTACATAAGGAACGGCTTCAATTAAATTGTGGCTAGTGACTCCGGTCTTACTTATCATGTCTAGTCACAGTTTGTTACTT	11
gen_1655	ATAGTTAGTAGTTCTATGATTAGTAGTGTGTCGGAATAGATGCGCTATCGTAGGGTCGTTTTGCTGAGTAATCACGGAAC	11
gen_1656	AGCGCTGATCATGTTAGGGAACAATAGTAATTATTTGGTTGATTCTAGAGGGGGACGTCTTTAATTCTGCACCATGGTCG	11
gen_1657	GGCAGGCGGTAGCGTTAAGCATGAGTTATCCTAGATTGAGTTGCTGGATACACATGACACGTAAACGCGTTCAGAAGCTG	11
gen_1658	ATTGGGTTTTAACTTAAATTCTTTCCATGTGTTTCATTTTTACCTGATACTATCAAACTGAATTCCTTCGGGACTACTTA	11
gen_1659	GTCTTAATTAATTCTTTTATATCACGTAGGTCGCGAATGGTCGATATCTGGTATGGATGCTCGTGGAATTTGGTGTATGT	11
gen_1660	TTATTTCCTCACGTGCATACTTCGGATAATGTCTCGTTATTAGTTTTACTTCACACTATTTGCGCACATGTGACTCGCTA	11
gen_1661	GATAATCGCTTGTGAAGCTGGTGCGATGCGGAGGCACTCTGAGCAATCTGTCAATCCTAGGCACAGGGATTTATGGTTTG	11
gen_1662	GCTTTCATAGCAGTCAGTTTGCCTTTTTGCGTTGGGATTATATGAGCTCCGGGGTAAGTGCCTACCGTCTATATGATCAT	11
gen_1663	TTAGGATAGTCCTTGATAGTAGAGCCCGCACATATATACAGGCGAGTAGGCCAGAAGAGTCTAGGGGAACGGGATTACGT	11
gen_1664	TATCTCACACATGTCGGATAAGCTTATCAGCTGCTCACAGGGGGACGATAGCATAGAGAAGGGTCCACATTGTGTCGCGC	11
gen_1665	GTACGTGTTGAATGCGCCAGGTTCCGTTGGTTCACGTACATCTTAAGCTCATCCGTAGATAGTCCTCTTCGGGTGTTCAC	11
gen_1666	AGTTTTCTGTATTGTAGGTATAATACACGTTTTTAAGTGTTAACTTCTCTTTCCTACGTTGTCCGGATTAGCAACTGTGC	11
gen_1667	CTTATCAGTGTATGAGATATCTGCGAGTCCGTGCCCTCAAAGGGATGTCGATTAGCTGACGTTCTTGTTTAGAATTTGTG	11
gen_1668	GTTAGTAAGTTAGATAAGGTATATGTACATTTCGGTTCTTTTAGGTATCCAACGATGCGTCCGTAGGACAGGGGCTGTCA	11
gen_1669	AGCCGTGTGCAGGGTTTATTTTGGAACGGATCATCAGTATTTGTTAACGGCATTGTACATTGGAGCGTACGTTTAGAGCT	11
gen_1670	GGCTCAAGACCTACTCCCTTAGGAGGGACGTAGGCAATAGATTTACACGTTACAAAGAAGACGTGCTAGCTCGACATCGA	11
gen_1671	TTGATCATGAATTAATGGTCTCTGTATGGCGATAGGAGGGACTAGTCGGGCACTCGGATCTAACGATTATGGATCGGTGG	11
gen_1672	CATTTGATGGGTGCTTAGTCGTGTTGGGCCTTGGGCAGCTTAGAAGGCGGGTGGTCTATCGATTTTGCCGTGGTGACCCA	11
gen_1673	CCGCAATATCTTAGGCGGCAACTTTAGTGACATTATTCTATTGGGTAAAAACGTTGGGTGGGGACTTAATGAGCGCAACA	11
gen_1674	GGCGGTGGGGGGACGAAAGAAGAGAGCTTGAAGATCAAGTTAAAGCGTCTGGCGTTCGAAAATGGATGATTTGCTCGGTG	11
gen_1675	AAGCCTGTACCGCCGATTCTTGGAGTTCAGACTCGATGTGTTAGAGGGCTCGAGTGAACTTCAGGTCGTGGGCATGCGGG	11
gen_1676	TCGGTCTGTTATAGGGGGGGAAGCATCTATTTTACCTAGACAATGGAATTACGTCTTTAGCGGATGTGCGCCTATAGTGA	11
gen_1677	GGCAATCTCTCAAGTTTGCGACAGTAATCGCAGAATGTGTTCTAGACGGTGTTAGGTATGTTGTCGGGATTGGCATCCTG	11
gen_1678	CCGCTATGTCACCACCAACCTCTGATACTCAACGTGGGATCTGGTTTCGGTGGCTAAATGCTCACAATCAAAAATAGTTT	11
gen_1679	AGTCAAAATGAATGTTGAAGCATATTGTAAGCGTCATCTACGCTTCCGCGATAGGGCGTAACAAGTCGGGATGCGGTGTA	11
gen_1680	GATTTGTAGCGTAGGACGATTTGCTTCCTACAGGAGCAGTGGATAGTATATTTATAAGGCCTTGCTTTGACGCTGTTCGC	11
gen_1681	AATGATACCTCATACTATTCCATGGAGCGAGTGAAATACGGTTTGTGCAAGTATGTAGTCAGCCTCGTCAGGCGGGAGGG	11
gen_1682	CTGGAACATAGTCGATCCTGTTCGTTATCGGTATGTCTACTAGGTTAGAGAACGGTGGTTCTTAAGTTTAGTTTGAGTAA	11
gen_1683	CCTTACGATCGAAAACTCGGAAATTAACTTTGACGAAATATCTCGTTTACATCTATAATTTCATTATGTTGATTCCATAT	11
gen_1684	GGCTGACCCACGAGCCAATTCCGTAGTGCTGTAATGATATTGTGTGGACAGTGTGAACGGGAGTGAAGAACGGTAGAGGT	11
gen_1685	CGGTGCAGTTGATGCCTTGTCCTGTGTAAACAAATAAGTTCGATCTTTTGAGGAGTCCCACGTCTTGGCTTGCAGTCGGG	11
gen_1686	TCGAGAAAAACTGTTTGTTCACTTAAGTGCCGGGTCGAATTTCCACTATATGCCTTATCAGGTGTGGTGGGCTTTGGTCA	11
gen_1687	ATCGAAACTAACTGAAGGGGTGTGATGCCGCCTGAGCTCGCTTATTCACGTCTAAAGTAGATTTATTTCGTCTACGGGTT	11
gen_1688	ACACCACGTCATCTCATGGCCGTACTTGATCTTTATAAGTTCCAGTAATTTTCGTAGCTCTTTCTAAGCTCCTTTGATGA	11
gen_1689	CGGTTACAGCAATGGATTGCCATGGCTGCACCGGCTATATTCCTCGTGTCGAGCTCTTACAAAGGTGGCATGTCTGCGTG	11
gen_1690	CTAGAAAAGGTGGATGTCTTTCTAATTAGTAGGGGACTACGGCCGGAAGAATTGTCGGCAGAGGTCAGTGTATACGTTAC	11
gen_1691	TCCTATGGGGTCTGTGATTTCAGTCACCGAAGAATGTATCGGAGCGAACTTGTTGCTAATGGTTCTAGTTTTTGATACCA	11
gen_1692	TAACTTATGGCTAAGCGGTATCTTTCATGAACGACCGGGGACAAATCTCTGGACCGGCAATTCGGTGCATGGATGATTGA	11
gen_1693	TCTGCGTATAAGGGATGGGTTACGTTTTTGTTTTAGGATTCATGCTTTGACATATTTATAGGAATAAAACCGGGTATGGA	11
gen_1694	GTCGCAAATATTATTAAAGAACCGTCATGGTAATCAGCACCTTTCTTCTTATCGAGCGTCGCCGCCTGGCATTTGTATGA	11
gen_1695	ATTGGTGTGGAGCTAAATTCGTCAGGTAGAGCGATCATTACGCTCAGGAGGCGACAGTCTTGAGACGACCCTGGTGTCGC	11
gen_1696	ATCATTTTGTAGCTGTACTTGGAGATCCAGGCGAGTATGGAGGGTGGAGCCAATCCACCCGCGATTACTGTAAAGTGGGT	11
gen_1697	AGATGCTTGCCCGGTAGTAAAGCCTCCTAGGCGCCCATTGAGTGCCCTTGACGACGCTATCCTTTGAATTCAAACACCGG	11
gen_1698	CCCTTGTTCTAGGGGCGAAGACTCAAATTATTATTAAGAGTGTGGTTCAATAGTTTTTTCACGTCCCCATCATTCGTCGA	11
gen_1699	TGTAGAAGATGAGTCCTGGTAAGTTTTTTACATATTGTCTACTGAGGTGCGAAATGGGATTACGGAAATTGACTACCTAC	11
gen_1700	TGTTAGCAAGGCCTAATTGTATTGGAATCTGGGCACTGGACGGGGCTAACACATAGCTAGACGTGGTTCTGCGGGGTTAG	11
gen_1701	ATGCCTTCATTTTAGACTAATCCATGGTTCAAGACAACGCTAGTGTACAGTAGTTACGGGTAATAGATCTCATCTCGAAG	11
gen_1702	ATATAGAGGGCAGTAAGATACACTGGGTTTAATCTGATTCACACTGCGTGGGAGACCCCGGCGGAGTCCACACCGTGTGA	11
gen_1703	TCATGATCGACTTAAGGGCGCTTATCAACCTGGCATTTGTTGGCCTATGATTCTCTTCAGGCCAGTCGGCGGACCGCTCT	11
gen_1704	GTTATGTGGGTTGGGATATGTCAGATATATTTTTTTATGTATATCTGTTAAATAGTGGAAAGGACATTTATGCATAGCTA	11
gen_1705	TTTCGGGTCTATCATGATCAGATATAGCGGCTTATTTATATCTAGTTTAGCGTGTCAAATCCGGCCAGCAATGTGTAGGA	11
gen_1706	GATACTTTCTGGGGGAATATCTTCTGTGTTAACGTACTCGTATACCGTAAAGAAGCGGTATCAATTATGGAAGTGTCATG	11
gen_1707	CCCGTACATAGGCGATGTTCATATGCGTAACGACTTGGTAATGGGTATTTGGATTAGCACGCCAGTCGGGGGTTCGTCTG	11
gen_1708	CCTTTGTTGACGATCACTTTGTTGTTTCGGTCTTACCTGAATCTCTTAAAATAGTCTCCCGCCATCGTCCTTGTTGGAGT	11
gen_1709	GCTCTAGGTCCGGTTGTCTGCCGGCAACATGGGTCAATAAGGGTATTTGATAGTCGATTCGGGTTTATCACTCAAGGTTA	11
gen_1710	GACTCAGGTGTAAAGTCTCAAAATGTTGCGTTAAAATAGAGTTTGGCATGTTAGGGCTGTCTGATTCGTCAAAGTGGCGC	11
gen_1711	TGACTTGATTCTGTGCGTCCCGAGGAGAATTGCACTTCTCTTGGTGCAGTTTGCTTTCCCATCAAACACAGGGTTATGTT	11
gen_1712	TCGCATATCATCATGAATGGGGCCTCGAGTCGAAAAGTCTCAGCTTTACTCGAGTCTAACGCTTGCATTTCCCGCATTGA	11
gen_1713	ACCTACTTGGACACTGATGGAGTACCGTGCTGGTTTTCGTACTCATCAATAAGTAAGGTTCGCATGTAGCTTTTCGCCTA	11
gen_1714	TCAGCCCTCTAATCGTGAGAGCGATTTGGGCTTGGCCACGTAAATTGGTAATACTACGGAGAAAGGCGGATAGGTCCACA	11
gen_1715	TATTTCAGTGGTAAAAGGTTGCGGCTTACGTTATGCAGGTCTCGATTCGTTCTTAGCCAGGATCATTCAGAATTTTTTAG	11
gen_1716	TTAACTTATGTGGGCATCTGCAGTTAGCGCCAAACAACTTACGTAGGTTAAACGGCTAAGATAAAAGGACAGGAAATTCG	11
gen_1717	TGTGTTACGTTCTTCGTCCTCCACCTTGATTTTATTTTTATGCTCCGTTCATACTGATGTGGCAACTCCTCTCTCTAGTA	11
gen_1718	TCTGCTTGGGTTGGTTTATACTTTGTCTGCACGAGTGGGAGGGGGAAACAAAGCCAGCAGATTGAATTATTTGAGCCTGC	11
gen_1719	AAAGCTTATGATGTGCGTCTTGATGTGGTGACTCTCATCAGCGCGGTTGACCGGTGAGGAGTTTTGGTTTCGTACGATCA	11
gen_1720	GTGTTCATAATTCCACTAAGCTTAAACTCGATTACGTGTTAGGACCGAATCCAGCCACACGACACAGGCAGTTTGTTAGT	11
gen_1721	TTTGTGGGGCACTTGGCGGTTGCTGACGAGGGGCTGCGTAAGGCGAGGTGGAGGTCTGGATAGTAAGGAATCAACATCGA	11
gen_1722	AATTGATAAGGCATTTCATTTCTGCATGTGCGCTTAGGCCCACTGCCCTAGGACAAAGTGTGGTGGCTCCGTGAGTAGGA	11
gen_1723	TATTAGTCACTGTCGTTTGTGGGCAAACATAAGTTAGTGCTATTCTGTAGGGCCAGGAATATTTCCACGGCGGAATTTGG	11
gen_1724	CAGTCCCACTGGTATTTAATCAATGTGCAGAGTAACCTCGAATGGTCAAGTGCGACCGCCGGAGCAGGGAGGGGGATTGG	11
gen_1725	GGTTCCTCTTGGGGGAGCATGCGATCCTGAGCGTGACATGCTTGATATTTGGGATGGTCTGTGGAATTGTAGTGTGCATC	11
gen_1726	TCACTCTGATGGACGTGATTATAGATTTATTCTTTGACTTTTGTTTTTCGTCTATTAGTCAACATAGATCGCAATATCGA	11
gen_1727	TCTCCCATGTTCGGTAGCGTTGGTGGCAGGACTATGCCTGTATTTGTGGCTCGACGCCTAACGCTCACATAAACTAGATG	11
gen_1728	TCTCGATTTAACTTTATCCTAGAGGTGCAGCAAGGTCCTTTTTTACCAATGACAGCGATACCGGCCGGCAAGGTGCAGAT	11
gen_1729	TTTCGGCGACATAAACTGGTTGAGGGCACGCATTACATTTGGTAACGAGGGATGGAGTAAGGTGTGTTGATCGCAAGTGC	11
gen_1730	GTACGTATCGGAGCTGTGGGCGGGCGTTATTTGAGTGTCCCTTGTTGGGGTCCTGAGGCTTATTTGAGGATTGGGCTCAA	11
gen_1731	AATATGGGGCGTGCTAACTATTAGTAGTTACACTATGTATACGTAGGGCCTTGCACGCTTTATTGTGAAGTCGTGGTTCG	11
gen_1732	CTTGTTAGTCGTCAAGGCGTATTTTGGTATATGATCAAACGGGTTTTGGGCAGCCTTAAGATTAGAGGAAATTTTGGGTG	11
gen_1733	TAGTTTTCGTTTATTAGGATCCCATGTAGAAGGCGTAGCCTTGGGATGTTTGTAACAAGGGGTGTTGGCGTTTGATTCAG	11
gen_1734	ACATATCTGATAATAGGTCTAAGTTATGTAATGTATGCGCGGAGTAAATTTATCTTAACACATAGTGTTAGATCATTCTT	11
gen_1735	TATCCGGGGACTGGACGTTTAAAGCGGGCGATCAATGCTGGGGGGACCACTGGCTAAGCTGGTCCTCACGGTGGATACCA	11
gen_1736	GGTGCCGTCAACAATTGATATCAACTCTAATTCTTATATGGCGCATCTTGAATGCTTGCGGAGCCCGACCCTGGGTAGTT	11
gen_1737	TTTGATGATGGGCGCATTATCGGTTGGAATGGTGTGTTGAGGTTGTTCCCGGCGACTGGCTTTGTATATGGTCTGTAAGT	11
gen_1738	CGTCGCTTTAACTCACTGTTAATGGGCGGGCGACATTGTTAGGGTAGTGTTTCATACAGAGGACCCAGCAGGCCTGTGAT	11
gen_1739	TTTATCTGTAGGCAACTGTAGTTCGTAGCCAAGTTGTCTTACAAGTCAGACACCGACAAGTAACTAAGCTCGCAATTTTA	11
gen_1740	CATTGAGACGAGCTTATTCTGAGTTGCAAGAGAGCTCGCATTGTGTGGACGGCTGACGAGCTGACGTGATCTCTGTGACC	11
gen_1741	TAGATTTGTGATGTTGTTTCCTGATGCAACTTCAAGTGATCACGGGGGTCTCGTACGACATGGCCCTGGTCGTCGTGTAA	11
gen_1742	TCTATTAAGTTGCACTTGAGGGCGTTTACATAAGTCTTGAACGGTTAGGGATCCGAATAGGCCTGGCGGCGCCCGTAGCT	11
gen_1743	GCTGTTTTGAATGTGTGCACAGGCGTTGTTACAACGGCGTAATGTAGAAGCAATGGTATGCTTTAACGCGCAATATAAGA	11
gen_1744	ATTGCATCTTCATATTTAGGAGTTTTTGCGATGACTTATTACTGTCTCAGCTCTGTATAATACTGACTGGGCTTAGCTCA	11
gen_1745	AATGTACGAGATTAACCCAAGGTCTCGACTGTCTGTTAACTATTGGCTATGGCGGCGCTAGAAAAGGGGACGGAGGTCGG	11
gen_1746	TCTTACCGAACGAATCGTGGTCTATGACGTGCATCTCATTTCTTCGATCTTCCAGTTACTGGGAACACCAGAATTCGATT	11
gen_1747	TGGGGCTTTGAGGGTTTTCAATTGGGTTTAAAGCTGGGCATAGAGGATGCTGTCGTAGGTTACTGTCCTCGCCGGCCGCA	11
gen_1748	TTGTCACGTCGTGTCCTATGAGCTTGGCGGTAAAAGTAGTTATGGGTGGGTATTCCGAGGAGAAATAATAAAATACTGTA	11
gen_1749	AGGAAGTTTCACTGGGTATGAGGCATATTTTCTAGCGTTATATCTGCGTTAAATTATGCACCGGAGAACAGTGTACCCCA	11
gen_1750	TAAACCAGGGGTGTATCCCGTTATTAAAGCATGATTTAGCGCGATGGACCCCATTGACGTGCCGACAATCTTCATGATCA	11
gen_1751	CATAGAGTGGAGCGTCGCTATCACTTTTTTGATATTGAAAAGTGAGTAGCATGTCTACCGGCAGAGCATACTGCATGTTC	11
gen_1752	AGTTCTGGTGTGCTCGGTTTGTTTGATTTTTATTTCACCATCATTGATTACTATGTATTTATGATTTGCGAGCTAACTGA	11
gen_1753	TAGTATTGTGTTTTAGTCCCGCGTTCAAATAGCCCTGATTCTCAACTTCCTAGATCACTCAACTACCCCCGAGTTTCGTA	11
gen_1754	ATAGCAGAGCAGGGCGATGCAATAGGCTCCAGCCCATATGCCTCTCTAAATTACTGATGGGGCGAACAGAGGCTCCGGGA	11
gen_1755	TTGGAACCCTCGGGTGGCCGTCGTATGCAAGGTACCGGTCCCAGTGGGTCTTTGTTGGGACTGGCGCTACTGGGGCGTAA	11
gen_1756	TCGACCCACGGTTAAATCCTTACAATTGACAGGGCATTGGGGCAACTCTAGATCTACTGAACCTCAGCGCTCGGATGTAT	11
gen_1757	TGAGGCAGGAACTTCTGCCGCAGTAATTCGGAATCTGTAGTGGAGTTGCGAACTGGTCGAGGCTCTACGGCTTATGGCGA	11
gen_1758	GGTCGATCAGCGACGTGCAGCCTGGCGATATGTTGGTGACGAGTGGTTAGCGAGAGCTGGAGGGTCAGGGTCACATGGTA	11
gen_1759	AGATGGAGGATGTCACCTAGCTAGCTCCCCCGCGGTGTTGTGGTTGGTTGGCGAGGGAGATTTTTGTTTGATCCACAAGT	11
gen_1760	TCGCCTATATTAAGAGAACGTTTTGCATCTTTCGGGACCCAGCCCCAAGGTGCTTATCAGACGGTGGATAATTTCCTGGA	11
gen_1761	TTGTACAGTGCGGGATAGTCAGACGGTTATTTTGGCGGCTGTGAGTTAATACTAAATATTTGAGTGTATCCAAATAAGTT	11
gen_1762	TTATCGCAGGAATACGACATTTCGCATGTGCGATGCGGAGGGTTTGCCCTCCTCCCCTCTTGCTGGAGGCCAGGGTCTGT	11
gen_1763	TCAAATAGTCACATTTTTATAGTTATGTTGGTATCGGACGCGGTTGATGGCAAAGGCATAAATCTGAATGCTAGCTACTG	11
gen_1764	TGTAGCGATGTGTTCTGAACGAGTCTCCTACTTTCACCTCTTTATGTACGTAGGTTATGTGATTGAACTCTCCTTGGCTC	11
gen_1765	GTGACAGTGAATTGTAAGTTAGTTGATGGAAGTAGTCCAGGCGGCAGTGCTTTGTCCCCCTCAGCAGCGGGGACGGAGGA	11
gen_1766	TCGGGAGAACTAATTTTGGAATCTAGTGAAGGCGGCATCGTCTAGGTAAGTTAAGTATGTTAGGGCGATTGTCTTAGAGT	11
gen_1767	TGTTTTGTGTAGCGTTGGGCTCTAGAATGGATCTTGCCATCTCGTGGTATGATCGCTTGAGGTGAGCACGGTCGCAGGGG	11
gen_1768	ATTGGAAATTGAGACTCAATGTCAATGTCGACACTCACATGCCCTGAAATCTCGGGGAAACTCACTGGTCCCGTAGTAAA	11
gen_1769	TGGTTAGGACGTTGTAATTGGCATGAAAGGGTACAGACGTTGCGAACCGCATTTTCAGGAATTGCGGACGATAGTGGAGG	11
gen_1770	GTAGATAATAATGTAGTGCGAGGGGGTTTACTTGAGACCTGTCTTAGCAGATTTGTGGTGTGACCAGGGCATACACGCAA	11
gen_1771	GCATATATTGGTATAAGTTCGGAACGTCCATTTTGGCTTCATAGTTCATGTTAGCACGGCTCCGGTCGATGTCGACATGT	11
gen_1772	TATCCCAGATAGGCACTCCAATGTGACTTATCGCTGCGCAGTGTGTGGCTTACCGGTTACAGGTCGGCCTGCCATCCCTG	11
gen_1773	TCGACAGCATCCACTATGCGTGTTCGGTTGGCTTGGATCCGATAGTTCGGTTCAGCTATCGAAATGGATCCAGGGGCTAC	11
gen_1774	TGCACACAGTGTGGGGTTGGTGTTCGACAAAGACATAAATAGGTGTAAAGTCGCCGAGGCAACCAGTGTGGGTGCGAGGT	11
gen_1775	CTTTAATCGTGGGATTGTGCCGCTGCTTGGGATTAGATCAATCCGTCATATGCATCCGCACACAGATTGCCCCGTGTGGA	11
gen_1776	TGTGTGAGCGACTTAATTCATATTCCTAATTGCAGTAGAAGGGCATTACTTTAGTATGTATACGCGGGTGTAATCACGTG	11
gen_1777	TGAGCAACAGGGTTTAGTGTAACGTAGGGTCGGAGCGACGGTGCTGTTCAGTATGTCTTTCGAACGGATAGGTCGGCAAG	11
gen_1778	CACTTTTCAGGGTGGGACATGGTGCCATGAGACTCGTCTATTTCATTCACCTATGCCCGTTCTGCGATGCGCATACTGAT	11
gen_1779	AATGTTACTTCGTGGAATTCTTTTCTTGAGCTGGCTAGTGTTATAGGTTCATGTATCTCTTACAAATGGAGATTTATGAG	11
gen_1780	CTTCATCGTAAGTTCGATGGCCATTACAGAGCGGCGAGTACACGCACGTTGAGGGTAGACAGTCAAGCCTTGCGGCCAAG	11
gen_1781	TAATTGTAGTCAGTCTGATTAAGTTTCGTATTCTGAGCACTGTTGGGATTTTAGGGACCGTCAGCGGGGTCACCGTTTGC	11
gen_1782	TCGATTCTTCGAGAGTTCGCGGTTCGTGACTTAGTGATCATATAAATTAAGTGGTGTTATGAGTTGTTTGCATATGAGAA	11
gen_1783	TCGTAGGTTAAAGGGAATTGGCGCGTTTGGAGTGTTTCACTTGTCTCTTGTGATTTCATTGAACTGCATGGGCGTATTGA	11
gen_1784	ATCACGATTCAGATTAGTTCTGATTCATGGAGCCTCGTAGATTATCCGCTTCAGTTGGCTACCCCTGTCCTGTCCCCGAA	11
gen_1785	TCCGGCGGATTGCTACCGCTTGAACTGGCTCATCGTTGGATTAATCCCTTTTTGAGTTCACACGGTCTTTGGGTTGGGGT	11
gen_1786	GCTCTGGTATGGGCCATCCTCGTTAGCGATTAGATCTGCTCACCAGGCTAATGGCAACAAAGTACAACGTTGCGTGGTAG	11
gen_1787	TTGTTAGATCGGATTTTGCTTTCCTCAACACTTGTGAATATTTAGGTCCTGCATACGGGGTGGAGAGGGTAGAATAGGGA	11
gen_1788	CTTTCAGTGTGGGTAGCTTCAGATTATGTCAGTTTTCCAACATTATGCCATTATATGAGATGTTTTCACGGTATATGGTG	11
gen_1789	GAGCGCTACAGATTGGCCAGTTTTCTGATCTTGACGCCAGCCTAGATGATTCTGGGGGGATTGGCTAGGTGGTCTCGGGT	11
gen_1790	GTCCTTTGTTAGCGGTGTTGGCGCTTGGCAAACATCGGTCGAAGAAGTGTGATATTTCTATTGGTTGTTGGCCTGCGTCT	11
gen_1791	TTCGACATCTCAATTTATAGTAGGCACATGGTCCATGTAATCAAGCTTACTATGGTTTTTGTTCAGAGACCTGGGTAAGA	11
gen_1792	TTGGGCCTCCCCCTTCACGTACATGGGGTGGTTTACAGGTTACGTGCACTTCGGAGCTCTGCCAGCCGCCGTTGGTTCCA	11
gen_1793	TGAGACTGGGCCGATATAAAAAGGACTTTGAGTCTGGTATCAGCAGATATTTTAGCACTGCCAGTGTTGGGGATCCCATG	11
gen_1794	TGGGTCCATTATCGGTTGTGGCTTTCGATGTGGCCACATAATAATTACAGCCCTGTCTCCTGCGATTTGCGTCAAGCGGA	11
gen_1795	GAGTTATCTAATGTTAGCTGTGCCTTATGTCATGTGGTCATCGGACGGAAGGTACAGTTGGCGGTAAAAGTGTACACGAA	11
gen_1796	TCTGTGCCAATGCAGATCGGGCAGGGTGGACATCATGCGATCTAGGCTTGGTTGTGCAATTGTAACGTAATAAGCGCATA	11
gen_1797	CGTGCTTAAAAGGCGTATTTACTCTCTGCAGTATCCGTAGCTTTCAGTGCATACTACCTGTATGACATCCGGCAGCTTTA	11
gen_1798	ACGTTTTTGTCGTATGATAATCAGGTAGAGCCTTATGACGGCCATTCATGTGTTATTCTGTGCTATCGCGTCGTAAAGGA	11
gen_1799	TCGACAACGATTTGTGTATCCAAGCGGGGTGACGTTCCATTAGTAATAGATTCTAATAAATAATGTGTCCATACAATAGG	11
gen_1800	CGTTGGGGGTAGAGCAGGCATAGCATGGTTTATTGCCTCGATATAGGCAGTCTGGGAGTAGAGTAGACGTTCCTGGGGAG	11
gen_1801	CGTTTTTATGCTAGCTTTTGTCGTAAGCTTATTGAACGTGCAATTATCCGCAAGTTGGTTGACATACTTATATGGACATG	11
gen_1802	CAGGAAAATGCGGTATCACCAGATTTAAAGTAGGCTGCTCCTAGTGGTTACTCCGGCGCCTCAGCGGTACAGAGGTACCA	11
gen_1803	TAGCATGGGGATTATGATCAGCACCTCATATAGTTAAGACTCGCCGTGGTCAATAGAGCACAGCGCGGCACGATCTCATC	11
gen_1804	CATGGTATGTAGGCTATGTACTCGGTTCGCCAGATTCTTTTAGGCAACTAATCCACCAGGGCACACGATCGTGACGTGAG	11
gen_1805	TTATACAGTTTCAAGCAGCTTTCAATAACGTTTTAGTAGACTCGGGGTCGCCGCGGGTCACATCACTAAAATGAGTATGG	11
gen_1806	TTGTGAGGCACTCTGGACCGTATAAGGTTTCGCCCATGCGCTTATAGCGTCGAGTTCTGGTGATATGATTTCCGTAGTCA	11
gen_1807	TGTATCTGCAAGGGCTATGTGGGTGATGTAGGTGCAGGGGGGGACGAAGGCCGCTAGTTCGAGGCGGGACGTGTCACAAA	11
gen_1808	TTCGAATGAGCTGAATCATTTGTATGGACTCTATTACCGAATTCTGCAAAGGTTTGTTGATGCGCGACGGCCTTGTAGAA	11
gen_1809	TGACAGATTGTGGAGGACATTGGTGTCACGCTACTAGGCTACGGCTATGGCGGCCCCAGATAGGCGCCAGTTGTCTTGTG	11
gen_1810	GTCGAAGGAGGCGTTCCCGGTATGTTTGTGGTAGGTATTTAGAGCTAGCCAACGCACCCACGTCATAGGGAAGAGATTTT	11
gen_1811	GTTAGGAGTTAGTCTCGGTGTGAGCGTCGGAGGGTATACGTATGTCACTTCTGTATACGGGGCTTTAGGTTTATCTTGGT	11
gen_1812	TGGAGTGGGTACGTTCTCTTGTGGTATTTAGTTCCTGAGGACGGATGAGGTAACGTACGTGAACTGATGACACGGATTCG	11
gen_1813	CCGATTGTTAATGAAGTAAGGCGAACACTGCCCGAGTTGACCATATCCAAAGACATTACAATAAAACTAGCGTCAGGAAG	11
gen_1814	GATATTTGAAAGTATAATTGGAGGCATACGGGTTTTGATAATGGTATATTGAGGGCGCATCAGATGCGTGGCCTATTCTG	11
gen_1815	TCATTCTTAAGTAAATGGTGCTATGGAATAAACAGGGTTGAATCTTGTTTGTTAGTCTTGTTCATCGTGATACGTAGAGC	11
gen_1816	AATTCGAAAGAGAGGTGCTAGTCTGTATTGAGTAGTAGCTGTGGGTGTTGGGAACAAGCGCTGGCCCAGCTCGAGGACCA	11
gen_1817	TCGAGCTGTCCTATGAAACCCTGCATCTCTAAGGAACGCCTTACTCTGAAAAATTTTATCTAGTGGGTGCCTACCATCGT	11
gen_1818	TATTTTGAGCTTAGGGTTTAAACCTCTTTGGTAATAGGTGTGAGCCTGACTCTTGGCACTCCAACTGGTTTGCCAAGTAC	11
gen_1819	TCAATGAATGCTCCATTGGATACGTGAAATGTTTATAGGTCTTTTATGTGCGGCCCCACTTAATCGCGACGTCTGATATG	11
gen_1820	GTTGGAGAACATTTATGAGCAGCTCTAGATTGTTTATTTGGTCGTCGCATAACTTCGGCTTGTGATGAAACGTCAGACAT	11
gen_1821	CGGGCTTCGCTATAGTGTCTGGGGGAATGAGATACAAGGAATGGTTTGAGGTTGATCGTCGGTTCGGGTAGGTTGGGGTG	11
gen_1822	ATCCTAGCGTTCAGTCGAGTGAACGATCTACTTGTGGATGCTTGCTAAAATCTCATCTGTTGTCAGGCGATGGAGTTCAG	11
gen_1823	GTTTCGTAGTAAGGTTAACGAGAGATTTTGGCTCGGTCTTAGATTGTGGGCGATGGGTAGTACTTCGTTTTGGCTAGGTG	11
gen_1824	CTAAGTTCCTACGAGTCGTGTTCGCTCGTAGGTTAGGGCAGACTCAGCCTCTCACGTTACTGGGGGCAGCGTCGATTCCA	11
gen_1825	GTTCAAACCCTAGGTGGAGAACTCCGGTTAGTTTAGCGTATTGTCATTTAGTGTACTACCAGCGTTGCCTGTGGCTGGGA	11
gen_1826	GTCTTGGTCTCCTTCGGTTTTAACCGGTTTATCCTTTGCCAAGTTAGCCGTTGCGGTCACTGTTGTTTGAGTCCCGTAGC	11
gen_1827	GCAAGCAGATCACTTGTGTTTGGAGGTCAGTGGCCGCAGCAATACGCAGTTATGCGTCTGAGGGGATGGATTTCCGCGAA	11
gen_1828	TTCCGCCAAAGGAAAGGGACACCGGGGGCAGTCTAGGTTAACTGGCGAGCCATGTGCACCTATTCATCGGCAAAGGTCAA	11
gen_1829	TAACGTGTGGTTGTTATTGATCGTGTGCAGGTAAGACTTCATTACCTTTATACTTTCGTAATTTGGTAATTATCGGGTAG	11
gen_1830	ACAGAGTGTATCCTAACACAGCGACGTACGTTGGGGTTATTACGTGCGTGGCTTGAGTGGGACCCATTTGTGGGCGGGGA	11
gen_1831	GGTCTGGGTATTTCTTATTTGGAATGGTGGGCGTTCTATTTTGCACGCAACATACTAGTTTCCTGATCGGCTGATTACAA	11
gen_1832	GAATCTTCCTAATTTGCGTATGTACTAGATCTATGCTGCACGAGCGAATACGCGGAACATAGGCATCTAACTGGTGGAGA	11
gen_1833	TCCATTTTGTAAAATTATGTGCGTCTAAAGTGCGTTTTGCTGGCGTTTCGTTGCTACAGTGTCGAAACATGTTGTAATGG	11
gen_1834	AGGCCGGTGTACTGTCACGTCGACGTCAACGCAACTACATTAACTGCGATTGCCATCGGTTCCCCTTAATTCGCATCCTA	11
gen_1835	TCTTTCACTAACAACCTCCGGTCCACAGTCAGCCAGGTATGCTATCGTACATATACGATCATTAGTGGTTTATGGGCTTT	11
gen_1836	GTTAATTAATATGGATCAAGCTTCATGCTTAAATTTCTTTGATATCGATACTAAGATTAAGTGTGGATCGTCTCCGCAGG	11
gen_1837	TCGCAGTCTCCTATCTTGAGGGTCGTCAATTCTGTCAGTTTTATAGCTCTCGAATCCTTCACTTTCGGGTTGGCGCATTT	11
gen_1838	TACGTGGGCTTGATCGCGGACAATGTCTTACGGTTTACAACAGACAAGTGCAGATTTGTCACTTGGACCACATCGCCTTT	11
gen_1839	TAAAGTTGTGTGGTAGGTATATGGTAAGGGAAATTGGTAAATCATAGAATCATGGGCCGGGCATGCGGCCACACCGGTTG	11
gen_1840	TGGTTCTATTATTGTCACTGATTTATGGATTTACGAACTCTCGCTCTTTCTTCCGCCTTGAAGAGATACTTCATATTTAG	11
gen_1841	ACGACCCTGTGAAAATATTGAGGTGCATCTAGTCGTGTACGTGATTCCACACGAGTTCGCGTCTATTGTGGCTCTGTCAA	11
gen_1842	GCCATAGCTAACCTTCTGAACCATTATTTGGGATACTGGTGTCTGAAGTTAATATACGGGGGCGCTCATCTTCGGGCCAA	11
gen_1843	TAGGTGGAGGAATATATTGTGACCTATCAAGTTCCGTGCCTCGTTCGCTGTAAACTAAAGGTCATGACCGTATAGATCTC	11
gen_1844	CGGGCCTTCAGCGGTACCATCTGTCCACGACAAAGCTAACCTCCAATCGGTTGGGTCGGAAGCCCTATCGGTGCTTGTTG	11
gen_1845	ACGGATATACGGATCGTATTTGATTGCATTCTTTGTCCATAAGGTCGATCACTATTTAGCGGATTCAGAGATACAAGTGA	11
gen_1846	GGTATATGCTAGTACTGTTAGTGTGCTTATAATTGCATCTTTCACGTGGTAAGGTAAAAAATGGCCGGCTGCACATTTTT	11
gen_1847	TGCGGCGGACACTTCATTGCTTTGCATGCAGGGTGGTCTGGAATTGCTTACATGTGTCCGCTGCTCTTCTACGTAGGCTT	11
gen_1848	GTATCATCTATCGCTGTTTCGGTTTTGCTTGTATTGGTGGCCGAGTTCCAGGCATTGGAGGATCTACCTTCATAAGAATA	11
gen_1849	CTTTGCGTGGTAGCTATAAACTCTCGGTTGGCTAAGCATATCCTTCATAGAGGGGCGGGGCATGTCCTTGCGTGCTGAGA	11
gen_1850	ATGTTGATCTATGAGTATGGGGTGAACGGGGAGGTACGTGGGGGTCCATCCGTCAAGGCCCTCGGCATCGAATGCCTTGA	11
gen_1851	TTATAGTTTCTCTGAAATGAGTATTGTGTTCCCTGGTAGGTCGTGAGTTTTTCTGATCTCAATTTTCTTAGCTGATGCCT	11
gen_1852	CCTGGTTAAGTGTTTATCGTCCCAGACAAGACAGCAGAGTGATAGAGAAGCGCTATGGGCACGGGGGAGATTTGCAGGGT	11
gen_1853	CATTCGGCCAGTGCTTACTTTCCCTCGACATCTTAGCTCTACTTTCTGTAACACTTCTCTAGGACTGAGTCGCGGCTAAT	11
gen_1854	GGAGACGTCAGGACCAGGGGTGCGTAAACTAGAGACTTTGGTGTGGAGGTCCAGAGATGATGACTCGACGCTGGTAGGTC	11
gen_1855	CGCGTCACTTCTAGTGTAACAGTTAGTTTTTGCATTTACTAGTCGCATGAATATTCGAGACCCTGTAGGGCAAGTCCTTC	11
gen_1856	CCTCTAATGTTTTTATGATTTGGGCAGTCCGGTTAGCACGAGGTATGGTAAGTTACATGGGCGCGATTACTAACTATGCA	11
gen_1857	TACTGCTAGGCGATCATAGAGCCAATGAAGTTTATTTTTTAATCCCGTTCATGTGGCTAGCGACATCGTCAGCTTGTCAA	11
gen_1858	GTAGAGATGGCGATACCTCTCGGGCTAGGAGCGTTCATACTAGGTGGTAGCGTGGTTACCGGGTCAGACGACCATAGCTT	11
gen_1859	GCCTATCGTTCGACTCGTCTTGCTGCGCATAGTCATATGGTGATCTTTATTCCGTTAAACAATTTGCTTAGACATTGATT	11
gen_1860	CGTTGGGCCAACCATGTGGCGAGATCTGTTACGACGCATCCGGCGTTCAGAGTACAGGTTAAGAGTGATCACCTGGCCAA	11
gen_1861	TTCTTTTAAGCGGGCCTGGTAAGCTTGCCATAGAATCTCTAGATGATGTGGTCCTTTGCGGCAGTGGGCCGGCCTTGAAT	11
gen_1862	TTGAAACGTTAAATTCGCCTACGCAGTTATTAATTTGTTTAGGTTGGTGTCTTGCCAGACTTTAGTATCCGGGGCTGTGT	11
gen_1863	TTCTCGGCTAGTTCAGCGTCTATTTCTCCTGTGCTGACCTGGTTTCCTAAAGTCAACTGGTGTTTTTATTTTGATTGGAT	11
gen_1864	ATAAATAGGCCTGTTCATAGTGTGGTCTTGGGGTAACGGGCATGGAATTGTGCTATTCTTGTTCTTCCCGGCTTTGCTGT	11
gen_1865	GTCGGGTGGCTCCATTAGAATGTTAAGGGTACGTTCATAGCATTCTTTATGTAGTCCGGTTTAGGCCTAAACCCCGGTCA	11
gen_1866	TCATTGTGGCACCTATGTTGGACGAATGTTGCTGCAATTGTGGGTGGGGCCACCTGGGCGCCCGTGGGGATTTCTTATTA	11
gen_1867	GGATTGGGCTGTTATAAGGTGAAGGGTTGAGCTATTTAAACTCCCTCGCCTTTCGGCTGGTATCGTAGCGTAGGAGTTGA	11
gen_1868	TACTAGTGTAGGTATTTCCGCTGTTATGCACACTTTTCTGTAGGCCTCCTGATATTTTAATACGTACGTGCCTACACTCT	11
gen_1869	TGTTTTCGGGTGGGATCTTCTATGCAGTGATCTTTAGTCTTGTAAATGAGTAACTAGCTTCGGGCGGCTGATACTTTTGA	11
gen_1870	GTTACATCTGCCGGATGTATTTTCATGGAATTATTGGTCGGGGGATTGAATTAAGTATCCATGGTGTTATGGGACTTCGT	11
gen_1871	ATTCATATTCTAGCGCTATGTTCATTTGATAGGATGTCGCCGATCATTCAAGCACACAGAGGGCAAGTAGGGCTAGCGGG	11
gen_1872	GCAATTTCGAGACCTTTGACAACCTTGGGTAAGTTCGCGGCTTGTCTCGATAAAGTCTACTGAGTATCCCTAGACCTTTC	11
gen_1873	CTGTTTTATGGGATATTTAATAATTATGTTAGTGTGCCTTGGGGTGTGTTGCGCTTTCAAGTGTATTGCCACGGGGTGTA	11
gen_1874	GAAGAGGTGGTCGTTGTGAGAAATGGGCCATACGGAACTACTGCTTGGGTGGTAGCCGGGCTGTCCAAGCGCCATAGCGA	11
gen_1875	TCTGCGGGATGCCCTCAAAACCGATAGAGGTGTGGGGTGCCTCATAGGGATGGAGAAGAGGTGGTGTGTTGAACTAGTGC	11
gen_1876	TTACTTGCGGGGGGAAGAAAGTGCGGTGGTGTAGAGTAGGTTACGGTGATGGCGATCGGCGGTTAGGGTTGTGTGTCCTA	11
gen_1877	TCTTCCCGGCGGTGCTTGTAATGTTTCGTTACACTGGTCTGTCGGTCTGTTGGTATATTTGAAGATGGTCCCGGGGCCTA	11
gen_1878	TCTGTGGGTTACGAATCGCTGAAGGAAAGGGTCCCGCATTACCGGTTAATTTTGGATAATGCGTTGGAGACTGGCACGCA	11
gen_1879	TGCTACTTTCATTGTGGAGAGATATTGAGAAATCTTCAATCCGGAAAGTCACGTTATTTTTTGAGGGTTTGTTGTGGTGA	11
gen_1880	CAAACGGTTGAGCTCAGGGTTTTCTACCCTAGAGTAATGCTTAGATAGCAAGTAGAAAGGGCACCGGTCATGCACGTGGG	11
gen_1881	AGAATTGAGGATTAGGAAGTGACTAGTACGCACTCTTTAGGCCCTGCAGGTTTAGTGACTGGAGAGCGGCCGCGGGTTAT	11
gen_1882	GCTTGTAGGAGACTCCGATCAATTGGTTGTTTTGAGCAGTCGCCACATCGAACAGTGGGGGATCGCCGCCAATTCGTTGA	11
gen_1883	AATGGGGTTTGTATGGAAACGGGTGTTATGTAGTGTCGGATCGCAATATAGTCACTGCAGTCGGGAAGTTGGGCAGTGGA	11
gen_1884	ATGGGCGTGATTCTTTTGACTAGCAAGCTTTTTATATGGTTAATTATGTGTTCTGTTCCGGGATGGCTGGTGGTCTCATC	11
gen_1885	ATTCATTTCCAGTTATGGGTAGGGTATATTGTACATATTCAACGATATTTAATAGCCTAGGACCTTCTACGGCACATCGG	11
gen_1886	CAGGAGGCTCTTTCGAATCAGACCTCCATTGGACCCTTTCGACATTACACATGTGAGTCACCAAGCCTACCGGGGTGCTG	11
gen_1887	TAGAAATAGACTGCCGTATTCACCTGTTTATTAGAAATTTGCGTCCAAAAGTACTCTTGAATCCGTTCGTCGCACATATT	11
gen_1888	CTCACTTGAGAATGGAGGTTCTATGAATGGGTTTGATTGTCGCCGACTCGGGTGTTGTTGTGGTATGTCCTATGCGGAGA	11
gen_1889	AAAAGGATCCCGGAATTATAGGAGCGTAGAGGTTAAGCTTGGGTGGGCTGGTCAGGGAGATGGCGCCGCTGGTGGCGTGA	11
gen_1890	AAGCATTTGTGGCATATATACAATGAGCAATGATGCAGCTGTGTGTGGGCAGGTGGGTTACAGGCTGGCTTGGGGCGCGC	11
gen_1891	ATAGTGAGAATGAGGTAGCAACTAGGCACTGTGCCAGTGAAGTGATTTTTACTTGTGATTTTTCGGTGGTATTTCGTCCC	11
gen_1892	TGTATAAGGTTAATGATGACGAAATCTCAGTGTTTGGATCCAGAGGCGTTTCTGATTATGAGGCTGGGCACGGCGTTCCC	11
gen_1893	TTTGTAGTTATTTGGCGTAGTATATAGAGATAGTTCACTCATCGTCTTATTTATGGATCAGTGCAATTTAGTGCTATTAG	11
gen_1894	TGTAAACGTGGAGTGAACATGGGCACCTCACATGGAACGTTTCTGGGTGGCCCGGGAAACTATGCCTGAACAGTACCACA	11
gen_1895	TTGTTTGCCGGATCACCAATTGGCTTGAATAGCGGCTGGTTTGTGTTACATTTCGTCTCAATGGATACTAATGCTAGAAG	11
gen_1896	TCTTCACACAGGGTGGTCTGCTCACCCACTGTTTCCGATCTTTGTTGGCCCCCAGGCGCCGTCAGTTAGTATAGGCACCA	11
gen_1897	GAATGTTAAAACTGTGGATGGGATTTTTTTTTATTTGATGTGCTTGCGACATTGGGCTGGGGGGACTTACTAACGGTCTA	11
gen_1898	TTTGCTCGCATATGAGAACAGGAATTTGGCCAGCTGTGTGTCGGGCTGAATGCCTACTTTCGATAGAGAATAGGAAGTGT	11
gen_1899	TAGTCCTGTCAGGTATGAAACTTACGTTGCTGGAACTCGTCGGGATGGAATAATACCCCGGCGCATTGGAAGTACTGTCA	11
gen_1900	GCTTTCAAACTTGCAACCTATACGAATTCAAGTCGACCGGTGTGAACATTTCAGAGCCGAGCTAATGTCATCTCCCAGAA	11
gen_1901	TGTTGCCCTCAGTTTTGAATCATATGAATTAGTCATCTTTACTCTCACGACGTAGTCATCAGGACCTCTGCGGCGGCATA	11
gen_1902	CTTGGCATTGTTTTAGGGGCCTAGTGAGATTGGACCCTAGAGGTGGCACGTGGGGCTGGGCGGTTGTGCGGCGGCTTCGA	11
gen_1903	GCTTCTTAACGAGATCTAAGCAAGTATACACTGTTTACTATTCCGTGATATCTCGTAGTTTGCACATGTACGGCGCCACC	11
gen_1904	GTTGTACCTAACCTGTCTGCCAGCCAGTGATGGTAATGTCGAATTGAGCGTGACTTGTATACGACCCGGAGTGGGTAATC	11
gen_1905	TACTATTAGGAGTCAGTTGCGTAGCCCGCGATTCACCATTGATCAAAGTTCGGGTGGAGGTAAGACTGGAGGAATACTCT	11
gen_1906	TCTCTCTTGTTAACGTTTGGTGTCTTGATCTCGGTATGTGGTTTTCATCACCGATCTGTAAACGATTGAATAGGTACTCT	11
gen_1907	ATTTAGTGGAGCGTTAGTCGCAAGCTCCCTTTGCTAATTTAGGTTGGTATTTAGGGGAAATGAGTCGAACTAAAATCTCG	11
gen_1908	AAAATAGGAAGTTGGACGACTTGTCTCGTACGTTGGAGATCTGGTTCTTGAAACATCCGCGAGGCTTATATTTTCAGTTT	11
gen_1909	CTTGAGGGCCGTTTAAATGCCAACCAGCGTATGTTGTAACGGTGACCTTAGGAATCTCTGTACCCAAAGATGCTCCCGGG	11
gen_1910	TGTTTGTTCGAGTAGATAATATTATCAGTAATCCAGGGAATTGGGACAGGGGCTAGGCACCCAGCAATATCGGTTTCTTC	11
gen_1911	CGCTCTCAGTGGTATACGTGTCTGGGCTACGGTGGATAAATTCGGGACCTGGCCACTGCCTTCGTCATGGAGAGGAGTTA	11
gen_1912	TGGCCCCCCAGGGTGTGCGGTCTATATTAATACGGTCTTCAACAGGGGCCCAACAACCTAGGGATAAGTATTAACGCGGC	11
gen_1913	CGAGGGAGTAGTTCCATACGTGGAAGCTATATTAGACCAAATCTTTGGTGATGCTTTCACGTCGGGTTGCTCTTGCGGGA	11
gen_1914	TAACAAGATCGTTTTCTTTGGTAGTACAGAATGGACTATGTACGTTGTCGCCGGACTAGTCATATATGGTCGGGTAGCTA	11
gen_1915	TAGACATAGCGGTTAGCTGGACTTGTCGCTGGTGATTTCATAGGATTACGAACATAGCGCCTGCGAGGCGTGTGAACCGA	11
gen_1916	TCGTAATTTGAGGGTAGCAAGGAGTGACCAGGTTACGCCATGAAGCCACCGAAACCGTACAAGGGGGTGGTATTCTGGGA	11
gen_1917	GCACCTTTTGTATAGTTTCTATGTTCGGACCAAGGATGTGAGGTTTGTGATGTGCGCAATGTTAGTCCAACTTGTGTATC	11
gen_1918	CGAGGGATAATTGGTACTGAGTGTGAAAACTCTATCTTAAACGGGTTTATTCTCCATGTAGTTTCTGGTGTACCTGCGGG	11
gen_1919	TAAGTTCGGGTTGATAGTGCATCCGCAGAGGTAATATAGAGCAGAGGGGGTTTCTGATCAATGTCAAGTGTGTGGTTTGC	11
gen_1920	TTTAGAAGGACGAGTGTACTGGCTTGGGCGGCGTTGCGACTAAAGGTCCTGCACCGACCTCGGGTCTTGGCCAAGGGTTT	11
gen_1921	GTCTCCATAGGAGGCTTGTTAAAGAGAACACGCATTTATAGTGTGTATCGCAAACTAATGAACGGTCGGACTCGCGTAAA	11
gen_1922	TCCGTCTACGTTAGTCACGAAGGTTGGGATGGTCGGTTAGCCACGCTTACGTGAGCCACGTACTAGTATTCGGGAGGGTG	11
gen_1923	GTGGCTATCGGGACCTCAGACGCCCCTTGCTGCCTTTGCAGAGCATATCGTGTTTGTACTAAGACGGTGTCTGCCCTGGA	11
gen_1924	TCCATTCACTATTCTTAATGGTTCACTATAGATTTGGGACGCTACATACCTGTGTTGGTATCAAGCGCGTCATGGCTTTC	11
gen_1925	GAATCTGAGTAAATGTGTAAAGGCTATGGGAGCACCGTACATAGGGGCCCTGTAGGACTCGTGTCCGCGTCGTGTAATGT	11
gen_1926	CATTCATCTTCTGATCTATCATCGTTCGTTTAATTCGTTATAATGTCATCTGTGTCGGTGCATTCACCTTTCTTTTTTGG	11
gen_1927	CGGCAACTCTTTGATTGTAAGCTGAATATAGACGATCTACGTAGAATACAGAACGAGGCGCCCGGGGGTCTTGTGTGCAA	11
gen_1928	TTCAGTAGCTATGCGTGAACTTCAACTTCACATGTCTGGCCCAGGAGAGGTGGGGGAAATCTTTCTTGCGGTCTAATTTG	11
gen_1929	AACCAGTAATTCGTGTGCACTTTCGAGGAGTTAATCGGGGCATACCTACGTAATGTTTCCGCCGGGGACTAATCGTGATC	11
gen_1930	GAGGACGAAATTTAAGCGTTGTGACGTCTCGGAACAACAAGTAGATCATTCACCGGGGATATAGGGAGGCAGGTGTGAGT	11
gen_1931	TCGTTTAGTCTTTTAAATGGTGGTGATGTTTCGTGCTTAAGTCTCTGAGGTCCGGGATCCATGTCCCAGGCTTTGGTTGG	11
gen_1932	TCATTAGGTTCGGGAGTTTAGCGATTCTTCGTCTGTGAGGCGTCTCTCCTTTAGGTAAATGGCTTATGTAGTTAATGAAC	11
gen_1933	GGTTTCTAGCCTTGTCTCTTTGCCAATAACTGATATTAGCGGTGCTTACGATGCTTACAGATCCAGGTTGACTTTTCTGG	11
gen_1934	TTATGGCGCCAGAAGCCTCACGCACAGCTATTGAGTCTGATTTGATCGAACGTTCTCAAGTAGCGCTCTTGGGATGGGGC	11
gen_1935	CATATCTTTCAATATCCATACTGCACGTATAACCGTCGCTCAATTGATGTTATGGGTATCTCACAGGGGGTTCGGGCAAG	11
gen_1936	CATTAGGCCAGTTTAAGCATATTCCCGAGGGCAGATTTCACGTTGGGTTATGCGATAGCGCTTACTGCTGCGGTCACCGA	11
gen_1937	CCAGACGGTCGTTTTTTATAGGGTCGGTCATATCTAGGCTATTCAAACCGGAAGGAGGGTATATCTTTACTCATTACCTC	11
gen_1938	ATTGATTTGGCCGTACGTTGGAATTAATGATAGAGCGATCTCTCTTATACCTCTTTGATTCTTTACAAGGTAGGCTGACC	11
gen_1939	AGTTATAGGATCACGTGCTAATCGCTATAGAGACTGCTACCTGGCATTCTTGGTTTGCGGTGTCGATACCTTAATGCTAC	11
gen_1940	AAATCCGTATTCCCCGTAGGCGCCTAAGGTAAAGTTGTTGGTGTGCGGTGCTTCCCTACAGGAGATGAAGTTAGTTATAT	11
gen_1941	AGAGTGGGGTTCTTTATAGCGACTTCGAACATGATTGGCGGACTTGGATGTGCGTTTAAAGTTGTAAGTGTCTAGGGCTT	11
gen_1942	GTGAAGGGAGGTGGACGAGTGTAGTAATGGCCGCGATTGAAAGGATATAGGATGCACGTGGTCGTATTTGCGGTCGTGTA	11
gen_1943	TGTTTTTATTGGTTTGCTGCTGCAAGCTGAGCTTGGAACTTCATGTCGGTACGGGAATAGATCACCAGGATCCCGGCTGG	11
gen_1944	CGTCAATTTCGTGGAAAGCTTCGGCTAGGCTTTATACGTTCATTATGTAGGGCGGTTGACTAGGTGTATACAAGTCGCCT	11
gen_1945	CCCAGGCCATCACCTAACGGGCTTGTCCGTAGGGCCTGTAAGATCGCTATTGGAGGGCAAGTGGTAAGGACGGCTTGTGA	11
gen_1946	TGTTGAGGTCTGCGGGGGACTGCTCGAATAAGCATATTTGCGCAGAGTGAATACCGCATACTAGCTCAGACAATTTGAGA	11
gen_1947	GTCTGTTCAAGCCATTACTCCGTATCATTTGTTATTCTGGCAGATGTCATGTTTTCGGGATGCCTCAACTTGGGCGTGAT	11
gen_1948	TATCCTTGTCTCCGATTTCTGTCTGGTTCATCAATCCGCCTGGATACGAGCCTGGAACCCCCTAGGCCCCTGTTACGGCT	11
gen_1949	TTTCTGAGGTAGTGTTGTCGATGTTGGCAGGTCGCTTCGGCGGCTCATTGCTCGCCACCAGATATGACTGAGGGCTGAGA	11
gen_1950	CGACTGTCTTTACCCCTGTACCTAATAACGTAGTTGTGTCTCGAACCAAGCGTAGCTCATTTCTGACTCTGACTTGATTT	11
gen_1951	AGATAGAGAAGGTGACATTGCTGGTATGTCTGCATGTCTGTTTAGGGCGTATTACCGGATAGAGATCATTTTCTTTCTGC	11
gen_1952	TAATCATTCGCGAATTCCTAGTTCGCTCTGCTTGGGTTTGGAGTGAAAGGTGCCCTAAGCTCATGATGTTTGAGTACGGA	11
gen_1953	CTATGAGTTCTGGTACGATTATTATCGGAGATTTTCGAGATCAGGTTACACTGTTTAGTTACAAACGTTCTGCGATTTTA	11
gen_1954	CTTCTCGTTCATGCCTTGTAAGATCAGACAGTTCCTTTGCTTCACGCGCACTCATTTTCACAATTGGCAATGAATTGCAT	11
gen_1955	ATTAGCAGGCCAAGTGGCGAGGCTTAAAAGTAATTATGTGTGTTTCTTTTGGAACTTTTGGATGGTATCGCGGGGTGATT	11
gen_1956	GTGGTGTAGAAAGGCATCCAAGTGTTCGGATGCCCCTGGCCTTTGTGCTGTATTGTAAGAGGTACTGGAGCCCCTCGCGA	11
gen_1957	GGTTAACTAGTGATTGTTTGTAACATGGTTTGCGGTAAGCGGGGTTGCTGTGTCCTTTTTGGTTTACCATTACGCCTCCA	11
gen_1958	GGTCTTGGTGGAATGTGTCTAGTTTTAGCGTATCGTGCCGCCCCTTCTAAATTGCTTCCTATTAAATGAACCAGTCAAAC	11
gen_1959	GGTTATGCATTTCGTCTACGTTTCCACTAGTTTGCAGATTGCGTTGTATGCAGTGTGATTGTCTTGCAAAATTACCTTCA	11
gen_1960	TGCTTCGCGTTTTACATCATGAATAGGGCTCTAAGGTTGGCACTTTGTCAGGCAGGGCAGATTCACGTATTGTGCGCTAC	11
gen_1961	TTATCATACCTGTAGTCTTAACATGAAATTTTAGCTGTGGAGTCGCTAGCCCGAATCCCCGGAGACAACACTTAACTCGA	11
gen_1962	ATTCGATGTATCGGTTTCAGTTTCGAAGTCTTAAGAGATACCCTCAACGCCAGTGGTTAAATATGTCCCCGCTGCCGGGA	11
gen_1963	CGAGTTATCGATAGTTAGGGCTGTCATGCAAAGTTTTTAGGTTATCAAAAACCGTGGAGGCATAACACTAATCTATGAGA	11
gen_1964	TCGCAATGGGATGAAAGGTGGGCGAAAGCGAGTGTTCTGCATCAGTGTGGTTGATAAGAATGGGGGCGCCCAGGTTAGTC	11
gen_1965	ATCATGTTACTAAAAAATCATGTCAATCCTGTCACAGTGCCGTTGTTTGTTTGTCCTTGCAAATGTCCCCTTTGCGTAGC	11
gen_1966	GCTAGATAGAACTTGAGATAATCGTCCTTGCTTATCGATACGCGTGCGACTCGATGCTGCGCCTGAACATGGATATTGTA	11
gen_1967	TAAGACTTCTTTGTGGGGGCGGGGGGCTGTTAAGCTGGGCTAGATGAGGTCATGGACATGTATCTCTCCAACAAGTATAG	11
gen_1968	TTCACAGCGTTTTGGCGTGCGGGAGAACGTTTGATCCCTCAGTACTCTGGGCCAACGGCTTGACACGAGATAGGATAAGA	11
gen_1969	TTAAATGAAGGTGGAGGTGTCGTGTGAAGGCGTTACCGACTTGAAGGTGTGTCGGATTTGGCGGTTTAAATATGGGCTGA	11
gen_1970	TCATATTTTCTCGGTTTCTTAGTTAGTTGTTATCTTGTGTGAGTGTTTATAGGAGGTAATCATACTTGACAGGTGATGCT	11
gen_1971	CTCACACATCGGTTATATAGCGCAGCGGGTTGTAACAAGACTTTCTTGTGGGATTGCCCCTCAGTTGATGCCTGCTCGGT	11
gen_1972	TGCAACAATCCTGAAGGACTGAGTCAGGGTACAGCATGATGAACGCGGCGACCGACTTGGGGGTGATCGGTGGCTAATGT	11
gen_1973	TGTACTTAGATATCGACTTTGGCTTTACGTCGCTTTTCTTTAGTCATATAAAAAGTTTAGTCGGCTAGGAACGTGATAAT	11
gen_1974	CGACCCTCGTACGTTGATATGCGTTGAGGTGACCTTATTCGGGGCGGTGTTTATACCTCTAGATATCACGTAAAGAATTA	11
gen_1975	AGATCGGGATTCTTATAAAGAGATTTGCGTCAGTTGGGAGAAGTGTGCCAATGAGAATAAGCTGGGTAGCGACCCGCTTT	11
gen_1976	GTTGGAGTAATGTGTCTTAGCTAGCATATAGCGATGTGTGTAGTGTGAGTGCGGGTTGCTGCGGCAGGCAGTCGGTATGG	11
gen_1977	TCATAATGATTTGTAGTTGAATGATTAGTCCCGTTTTGCCTGGCGTTCCGATAGTTAGCGGGGTCTGCACAATCGTCTAG	11
gen_1978	GGAAGGTCAGTAAAGCTTAGGGACCGCGTTCAACTTGCTCGAGCTATAGTTTTTAATCCATTATTCTTCATCCCAGATTG	11
gen_1979	TGCACTTAGTGAAGGCCTCGGGAAAAGTATGACTAGGTCGATCGTCTTGGGTCCTGGATCGATGAGTCGGGCAAGGCTTC	11
gen_1980	TTTTAGTGCTTTATTATTTATATCATCATGATCATATTGCTGTTAACATGGGGGACGCACGTCACGGCCCGGTGGCGATA	11
gen_1981	CAATGTCGGTGGTCGCTGGTCATAAAGCAAGAAGGCTTTTGTGTCTGGGCAAGGTCGTGCCCTCATAACTCGTGCCACTT	11
gen_1982	AGAACAAGCTGTACGTTATGCTCTGCATTACACGCTCGTTACCAAGTTAGGGGTGTGTTCGTTTCATACAGTGAAATCGA	11
gen_1983	TTATGGTGCTTTGGGCAGTTCCGTATGATGGCCTTTGCTACTCATGTGGGGAGCTAATCCGATTATCAGGGTATACACGT	11
gen_1984	CAATTTTAAACTCGTAATCGTCGATTCCTCCCGATTTCCAACGTATAAAGTACTTTATTTGTCCATACGTCTTGAGCTGC	11
gen_1985	TCCTTTAGGGCTCTCGGTGCAAAATGGTTTTGTGATCTGTGTAGGGTGGCTGATCAAAGTAGGATGTTGAGTGAAGCGGC	11
gen_1986	TTGAGCGCCGACGGTCGTTTGGGTCCTTGTATTTCTTTTGAATTAGGTACGAGGTAGTATATTGGACGTGTTACATATAA	11
gen_1987	TCGATGTTTGACCTATAGTGTGTGAACAATAGGGTTCGAACCATACTGGGTGTAAATTTGTTCTCAGTACAGTTCGCTCA	11
gen_1988	CACGCTATAAAGCACGAGTGTCGCAACTAACGTCTACTGGCGATTTGTGGTTTAGTATAAGGCCTCGTGGGTGTTCCGCA	11
gen_1989	TTCACGGGAGAATCCAATAGCGAATATGGTCATTGTTGCGAGACTCATCCATGAGGCTCGGGAGTTGCGTCGAGTCCATG	11
gen_1990	ATTTTATAAATCACAAGGTATGATCGATTCTAAATCTTGTTTAATATAAAACTATTACGTTGCAGGTAGTCCATCCTGTG	11
gen_1991	ATTCGACGTCACATATCGGATTCTCATATCGGATATGTTCATTTTGCCCTCTTAACCATAACTCTGGATGCGTTGTCTGC	11
gen_1992	TATTAGGCTCTTTCCAATTTCTTATCTTCGCGTATCTGTTCTATATTGACGAAATCTCCTGGCTACGCATATTTGATTAA	11
gen_1993	GGTTCAGGTTATTGGGTGTCTAGGTAGGTTGGTATTGTTGAAGAGGAACGGTGGCGATGCCCTTGCCAAGGGGGCCGCGA	11
gen_1994	CTTGATGCCTCTTTAGAACCCCGGCTGACGAGGTCATGGGTATTTAGTGGGTCGACGGTGTGCACCATGCCAGCTATTGG	11
gen_1995	CTAAATGATGAAATGGGTTAATTTGAAGCTGCATCCTATTGGGCCTGGGTGGACGGGCCCACTATGCCACAAATCTTGGG	11
gen_1996	TCGTCGTCGCACAGGCCTGCCTTGTGACGATGGAGGATGTGTGTAGCTCTCAGGGACTTGCGGGTGGGTCGGCGTTGGGC	11
gen_1997	TTTGATCGTCTCTTGGGATGTCGTCACTAAGCTGGGTTTAGGATCAATGTGGCTTGTTGTGACCTCCAGGGGCGCGTTGA	11
gen_1998	CCTTATGGTGGTTAGACTGGTCCGGCTGGTTCGAGTATCCAGGAGAGTTAGTCATTGGGCCGGCTTTGCTACGTGAGGTG	11
[truncated: 3,001 more rows]

## Sheet: README
Supplemental Table S1: All synthetic yeast promoter sequences generated by regLM.
