# Supplementary material for: Designing realistic regulatory DNA with autoregressive language models
Source: HighWire-hosted journal article supplement (doi:10.1101/gr.279142.124), 2024-09-01
Supplement: Supplemental_Table_S3.xlsx [file Supplemental_Table_S3.xlsx]

## Sheet: Supplemental_Table_S3
	Sequence	independent_complex_pred	independent_defined_pred	Group
gen_4680	GCTTTGTAGCGTAGGACGAAGTGCGGCCTACAGGAGCAGTGGAGGGTATATTTATAAGGCCTTGCTTTGACGCGGTTCGA	15.3493	13.4926	regLM
gen_4149	CTGCCCTTTTCTCTGGATCACCCCTGTAACGCGCCGCTTATCAGGTGGGCAACGTTGGGAACCTCTGATATACTCACGCG	14.7949	13.8725	regLM
gen_4849	CTTTGCGTGGTAGCGAGAAACTCTCGGGTGGCTAAGCCTATCCTCCGTAGAGGGGCGGGGCGTGTCCCTGCGTGCTGGGA	16.1008	14.6416	regLM
gen_4412	TACCAGACGTATGGTAAAGTCGGCGGGGTCATCAAATGAGGGTAATTGTCCACTCAAGCCGACGCGACGCACCGGGGACA	16.651	15.4742	regLM
gen_4063	GAGATTCGGGCGATTAAGAGGAGTGGGTGTCACGGTGGTAAATGGGGCAGCATCTGGTGTGGCATTTGAATGTTTGGGGG	14.5081	14.29	regLM
gen_4468	TGTTCTGAACTGAGGCGCGTAAAGGTTCAGGGTAACTGGCTTTTTAATGAGGCCCGCTGTGGGAGTATGCCTGGGGCTAA	16.4853	13.561	regLM
gen_4841	GCGACCGTGTGAAAATATCGTGGGGCATCTGGTCGTGTACGTGATTCCACACGCGTTCGCGCCTCGTGTGCCGCTGTCGA	15.498	13.7311	regLM
gen_4553	AGTTTCTGGGTGCCGTGTGCGTGGGTAGTCGCAATGGCTTGGGATTAGTCGCGAGAGCGAAGGGGGGCATCCTTTGTTTA	14.7298	14.4163	regLM
gen_4558	TCATGGACTGCTATTAAATTACCCTCAGGTAATATCTTTCTTTTCTGGCATTTTCGGGCCAGGTAGCAATGTCCGTGGCG	15.7134	13.5635	regLM
gen_4130	TCGATGTAGACGGAGACTGTGCTGGGAAGGGCACTCAGAGCGGGTTTGGCTCGGTATATGGTGCCGCGCGGATGGGAGCG	16.0826	13.9401	regLM
gen_4289	GAAAATGGCGGTTCTCAGGCCGCGGGGGTCACACCCTAGATAGACAGGGAGTTGGGTATGGATGTGGTCCCGCGGTTTGG	14.0382	13.3225	regLM
gen_4604	GCGAGCAGTTACTGGCGGCGTTGTCGGGCGGCGGGCGCATAGCACCAGCGAAACGGTTGGGAGCAGAAGAATGTCGGCGG	16.906	14.6343	regLM
gen_4735	TATCCGGGGACTGGACGGTTAAAGCGGGGGCTCGATGCTGGGGGCACCACTGGCCGAGCTGGTCCTCACGGGGCAATCCG	17.5015	15.958	regLM
gen_4066	CTACCGTTAGAAGTAGGTGTAACGTTTGTTACGTAGCGCGGCAGGAAATGTGAGCTGGCCACCCCCCCGGGCAGTGGTCC	14.1174	13.441	regLM
gen_4326	CAGTGGCAGTAACTCCGGTATGTAGCGCTCGGCGCCTGGGCGCCTCGGGCTCTGCGTGGGACAGGGACGCGGCGATTGGG	15.4458	14.3967	regLM
gen_4952	GGATAGAGAGGGTGACATTGCTGGTATGTCTGCATGTCTGTTTAGGGCGGATTACCGGACGGAGATCATTTTCTTTCTCA	15.4554	13.9453	regLM
gen_4498	GATTGGTTGGGTGGGACGGCGCTGGGCCTGATTTTTCGCTGCGGGGAGGAGTCTGGTGATTTTAACCCAGATACTAGGTC	15.7341	13.5087	regLM
gen_4803	TAGCCCGGGGGTTATGATCAGCACCTCGTACAGTTAAGACTCGCCGTGCGCAATGATGCACAGCGCGGCACGGTCGCAGG	15.1156	13.8364	regLM
gen_4360	ACGAGGTCCGGCATGTGTGGGTGGTTTTTGGGGCTTACCGTGGTTATAGGCGCCGTGAGCGCGATGCTATACGGTGTGGA	16.2252	13.4662	regLM
gen_4925	GAGTCTGAGCGGGTGTGTAAAGGCTATGGGCGCACCGTGCACGGGGGCCCTGTAGGACTCGTGGCCGGTTCGTGTCACGC	16.6734	15.1929	regLM
gen_4694	GTCGCAAATGTTATTGGAGAACCGTCCGGGTAATCAGCACCTTGCTTCTTATGGAGCGTCGCAGGCTGGCATTAGTATGA	17.093	14.4966	regLM
gen_4249	AGGCTTTACGCGTGAGGGTCTCTTCGTAGGAGTGCCCCTGACTTCTGGACAGGGGGGCTTGAGAGGAGCCTCGGGCCGGG	15.1116	14.982	regLM
gen_4739	TTTATCTGTAGGCCGCTGTAGGTCGCAGCCACGGGGTGCACCAAGTCAGACACCGACAGGTGGCGAAGCTCGCAATGTTA	15.9931	13.6173	regLM
gen_4389	TCGTGTCATGGGCTGTGAGACGGCACCCTTGCATCGTTTGAATATGGCCGCTTCTAATCGCGTCTTTTGGATGTTTGTCG	15.0561	14.3715	regLM
gen_4898	TTTTCTCGCGTATGAAAACAGGAATTTGGCCAGCTGTGTGTCGGGCTGGAAGCCGACTTTCGATAGAGAATCGGAAGTGG	15.5917	14.3297	regLM
gen_4141	CACATCAAATTGTATTTTGCAGAATCGTAGCATGTGACGGTTAACGGCTTCGTCCGTGCCTAGTGTGCATGAGCGTTTGG	15.3162	14.5632	regLM
gen_4572	TTATGCGCATCGGTGCCAAGGGAGATCAGACGGGCCGTGGCCGTGGTCGCTTGCCCTAGTGGCAGGGCGGTGTGGCGTGC	16.0143	15.183	regLM
gen_4466	ATCCTACCGGCGTTTATTTTTAGGGTCTGGTCGGCCATAGTGGTTCTGTGGGACGTGAACGGGTGTCCGGGTCCGGGTAA	17.0775	15.2326	regLM
gen_4410	GTCTCGGCGGGAAGGTTCGTTGGTGACGGCTAGAACAAGAATTCTCGTTGTCCAAGGCATGGCCCGCCGGGGTGCGGGGA	14.1162	13.2133	regLM
gen_4857	TACTGCCAGGCGATCATCGGGCCAATGAAGTTTCTTTTTTAAGCCCGCTCATGTGGCTGGCGACATCGGCACCTTGTCTG	15.1293	13.1131	regLM
gen_4301	TTTTTAGTCGCAGCGCGAGCGTACACCGTTGGCCCTTGTCGGCACCAGACAGGTACGAGTCGATTTACACAGGACGTCGG	15.8877	14.6959	regLM
gen_4118	TCCTCCGGCTACTTGGGGTTATATGCTGATTTTTTAAAAATCTCAGGAAGCGCCTCCGAGTAAGATTATTACCCCGACTC	14.7766	14.0136	regLM
gen_4077	TGTCGCCGTCTGGCGTGATGTCACCCGTGGCCGTAGGGTTTGTGGGGGGAGGTCGTACGGTGGGCGGTACCTTGTGTCTT	17.8995	15.3417	regLM
gen_4910	GGGTTGTGCGGGTAGGTAACATCATCAGTAATCCAGGGAATGGGGGCAGGGGCTAGGCACCCAGCAATGTGGCTTTCCAC	14.3436	13.8337	regLM
gen_4637	AGCTTGGGTGAAAGCTACCCGTTGCCGAGGGCGGTCGGACCCAAAAACACTAAGAGTCTAGTTTTTTGGCGGGAGACTTT	15.2841	13.6092	regLM
gen_4352	TCTTACGGGTGGGAAATTAGTAGCGGTGCGCCGACTCGGAGCGGTGCTAGAGGGGGCAAAGGGTGCGCGTGTCATTGACA	15.9861	15.2316	regLM
gen_4160	TTGCGTGCTTAAGACGTTCAGGTGGAGACGCGATGACAGAAGGCCCGGGCCACCGGGGGGTCTGAGGGGTCAGCACCGGT	14.7717	14.3761	regLM
gen_4041	CCGACCAAGCGACCTCATCCCTTGGCTAACATGTCGCGAGTCTCTGAGAGAGAAAATGGATGCGTGGCTTGCGCGCAAGG	14.5028	13.9048	regLM
gen_4993	TGGTAGGCTCGCGCGAAGTTCTTCTCTTCGCGTATCTGTTCTATATTGACGAGATCGCCGGGCGACGCAGAGTGGATTGA	16.6371	14.1888	regLM
gen_4980	TGCACTTAGTGCAGGCCTCGGGGAAAGTTTGACTAGGTCGGTCGTCCTGGGTGCTGGGTCGGTGAGACGGGCGAGGCGTC	15.3412	13.9595	regLM
gen_4764	GGTAGCGAGGGGTTCTGGACGGGTCTCCTACTGTCACCTCTGTACGGACGGAGGGTAAGTGAGGGGGCGCGCGTGGGCCA	17.3211	15.5109	regLM
gen_4324	AGTACTGCATCTATGGGTGTAGGGCGCTGTCGGTAAGACCCCCGGGCGTTGGTGATGCCGGCTCGGGTCGGGGGGGAGCG	15.7684	14.8323	regLM
gen_4939	ATTGATTTTGCCGTACGCTGGAATTAATGATAGAGCGGTCCCTCGTATACCTCTGGGATTCGTTTCAGGGTAAGCTGCTT	15.7377	13.9609	regLM
gen_4163	GGGTCGGGAGACACTCAACTCGGGGCAAGGTCTAAGCCATATTTAATAAGCGGAAGGGGGGCCTAAATCTAAGGTTTCGT	14.6329	13.6988	regLM
gen_4634	TCTGAGGCGCGCAAATGGTAATGCGACCATTCGTTTTGAATCTACCGCGCGGTCTAGGCTTGTAGCTTAGAATTGAGGTG	14.7036	12.824	regLM
gen_4682	CTGGAACATAGTCGGGCCTGTTCGTTATCGGTATGTCTCGTAGGTTAGAGAACGGTGGGTCGTCGGGTTACTCGGAGCGA	14.8291	12.7235	regLM
gen_4328	ATTGAGTTTTTCATGAGGGCCCGACGGCGGCAGGAGTCACCAGTGGGGCGCGGTGCTGGTCCCTCCATGTTTGACCAATG	16.5904	15.098	regLM
gen_4712	TCGCGTGTCATCATGAATGGGGCCTCGGGTGGAAAAGTCTCAGCTTTCCTCGAGTCTAACGCTTGCATTTCCCGCAACGA	15.7957	13.7677	regLM
gen_4105	GCGCTCCCGAGCCGAAGTCTGCTGTACCGTTGTGCAGGACTTTTGCTGGGCAGAATCTGGTGCGATGCAGGCTGTCATTT	15.1041	12.8728	regLM
gen_4622	TGTGCACCGGTTGTCCCCGCCGCTGAGGGCGTAGGGGCATGGCTAAGTACGAAGCTGGGATAGCGGGGACCGGTGAAGGG	14.2555	14.4598	regLM
gen_4639	TTTTATGTCACGTGGCCTTTGATCCTGCGTAGTCCAGGTCCTCGTACTCTGGCAACGTGGGTGCAGGATAACTCGCGCGG	14.7175	12.4839	regLM
gen_4434	TCTGTATGGTCATGGTATGTTGCGGGTATCTGCCGGACAGCGGAGTGCGCTGGTTACGGAGATCGGGGATCGCGTGCGGT	15.8511	14.3791	regLM
gen_4810	GTCGAAGGGGCCGTTCCCGGTATGTTTGGGGTAGGGGTTTAGAGCTAGCCGACGCCCCCACGTGATAGGGAGGAGACCGA	16.9671	16.6403	regLM
gen_4242	CTAACGCGTTCCATTTGCCGGATACTTTGATTAATGCGTGCGGCCAGTATGTTCCACCTCACTCGGAAGAATCGTGCGGT	15.1953	14.4905	regLM
gen_4306	GTTTTGGAGCGGTACGTTCTGGCGCGGTGGTTCTGGTCTTGTACGCTCTGCGGGTACCAGCCCGTCCTCCACTGTGGGCA	16.0411	14.0851	regLM
gen_4523	TTCAATTGTGCCTGAATCCTAGCCTTTCGGAAGTGGCGGGTACCGCGTCAAATGTCGTTCGGACTGGGGGTGACTCGTCT	14.8675	14.7816	regLM
gen_4994	GGTTCAGGTTATTGGGTGTTTAGGTGGGTCGGTATTGTTGAAGAGGGCCGGCGGCGATGCCCTTGCCAAGGGGGCTTCGG	13.7073	13.3229	regLM
gen_4026	CCTAATTGGCTGGCGCCACTGGGCTGCGTTAAGCCGCGGGCCGGGGCAGGAGACCGCTGTGGAGGGGATGCGCGCCCCAA	15.5861	15.6459	regLM
gen_4293	TCCGTCCTGAGGCAATTTTCTTGCCTTTCGTCAAAGAACGAATCCTGTCCTAAATTTGATTTCTTGGTTAGGGTATGTAG	14.4886	13.4505	regLM
gen_4903	GCGTCTTACCCCGATCTAAGCAAGTGTACACTGTTTACTATTCCGTGATATCTCGTAGTTTGCCCAGGTACGGCGCCGCT	14.3379	13.1681	regLM
gen_4109	GGATCGAGTCCTCTCTCGGGGTTGTCACGTGCTAAGTCCGATTAGAGCGTGTATGCCTAGGAAATCGTGGTGAGGCGCGA	16.5331	13.8451	regLM
gen_4284	CCTCACGGTGTACGTGGAGCTTTTGTTACAAACTTCGCGCGTTGAGGACTTCACGACCTCGCAGAGCTGCACCCCAGTTT	14.66	12.5762	regLM
gen_4737	TTTGATGAGGGGCGCGTTATCGGTTGGAGTGGCGTGTTGAGGTTGTTCCGGGCGACTCGCGTTGTATATGGTCTGTAAAT	15.7641	13.8848	regLM
gen_4516	TATCGGCCGGGCGCTTATGGAGGCTATTTGCGTTTTCGAACCAGCGCCCTACACGAGCACGCATATCAGGCCAGTTGTGA	14.1379	12.7285	regLM
gen_4654	CTACATAAGGAACGGCTTCAATTTAATTGTGCCTAGTGACTCCGGTCTTACTTATCATGTCTTGTCACGGCTTGTTCCCG	13.7447	13.007	regLM
gen_4625	TCGGAATGAAGTCGGGAAGCTGTCGTCTGTGAGTATGATTCGTCAACCCTCAGCGCATGCGGTCGGGGCAAAGTCTGTTC	15.8661	13.7884	regLM
gen_4500	GGAGTGTAATTTCGTTGGGCCGTGGTTGTTGCGCGAGATAGTGGTCGCGTCTTCCAAATGCTACGAAGCGTCGAAGCAGG	15.2372	15.0036	regLM
gen_4278	TACGTTTGAAAAGGGTTGAGGCTTAGATGCTTGGGTTTTGTGTCGTAAACTTCGTGCTGTCTCGGCTGGCCTCGGTGCAG	16.8979	14.6783	regLM
gen_4845	ACGGATATACGGCTCGCATTTGATTGCATTCTTTGTCCGCAAGGTCGATCACTGTTTAGCGGATTCAGAGGTACAAGCGA	13.2243	12.8885	regLM
gen_4897	GGATGTGAAAACTGTGCGTGGGATTTTTTTTTATTTGAGGTGCGTGCGCCACGGGGCTGGGGGGACTGACTAGCCGACTA	15.8143	14.623	regLM
gen_4982	CAATGTCGGCGGTCGCTGGTCATAAAGCCGGCAGGCTTTTGTGTCTGGGCGCGGGCGTGCCCTCATAACTCGTGACAGTT	16.1953	13.8871	regLM
gen_4505	ATTTTCACTAATTGGTGCTCGTTGAACCGCTTGAAGCGCGAGGGCTGGGGCCCGGGGCCACGGCAGTTGATGGGCGGAGG	15.7247	13.8707	regLM
gen_4670	GGCTCAAGACCTAGGCCCTTAGGAGGGACGCGGGCAATAGACGTACACGTTACAAAGAAGGCGGGCTCGCTCGTCTGCGT	15.5128	14.0812	regLM
gen_4458	TGTTGTCGGGATGACGCGTCGTACTATGCGATAGGTCGGACGTCTGGTCTTAAAAACCCTGTGTAAGTCAAGGCCAAGTG	14.2478	13.5722	regLM
gen_4319	GTAGAAGGATGCACTGGTGTTCTGTGCATTGGGGCGGGTGCAGTGATGCGCCAATGGTTTCCGGTGGTTAGACTTGCCCA	15.0083	15.0925	regLM
gen_4718	CCTGCTTGGGTTGGTTTATGCGTTGTCTGCGCGAGTGGGAGGGGGAAACGAAGCCAGCGGACGGAATTGTTTGAGCCTCA	15.9602	14.7176	regLM
gen_4796	TCTGTGCCCATGCGGCTCGGGCAGGGTGGACATCATGCGCTCTAGGCCTGGTTGTGCGAATGTAACGTAATAAGCCCTCA	14.6456	12.6665	regLM
gen_4470	GCATCTTCCTGGGTGCGAAGCCGCTCTCTTTCCATCGGAAAGTCAGTGGCACCCGGCCAGGCTAAAAATCAAGACCACGA	17.3936	16.152	regLM
gen_4816	AATTCGGAAGAGAGGTGCGGGTCGGTCTTGAGTAGTAGCTGTGGGTGTTGGGAGCAAGCGCTGGCCCAGCTCGGGGACCA	16.7532	14.7778	regLM
gen_4270	GGGGTTTAGCTGATTTCGGAGCCTCATGGTTGTAGGGTCATACCTCTCTGTTTCTTCGTGTATTTTTGGCCAAGGCCGGA	14.1515	13.0656	regLM
gen_4611	AAAGGAGTGATGCCGGCGGGTGTCGAAAAACCGGTTTCTGTAATGCTTCGGGGTGGGTTTGGGCGCTCCTCCCATGGCTA	15.4544	13.5465	regLM
gen_4220	GGTTAGGTTGAGACGTCGTTTGTTTGTGCCTTGTGAAATTTCGCGGTAGGTGGGCACTTGGTGGAGTGGAGGCTTTTGGA	14.5378	12.4742	regLM
gen_4330	GAACCCTCAGGTTATAAGGGGAACCGCGCGGGTGCTGGGAGCCCCCGGGGAATAGGCGAGGAAGGGGAAGGCTGTTTGTG	14.2704	14.7124	regLM
gen_4033	TTCCGACATTCGCACCTATGACATGGAGGGGTTTGACCTACGCGAAAAACATATTAAACGTTTGGTTCCGGGCGGGTTAC	16.221	15.3519	regLM
gen_4699	TGTGCACGATGAGTCCTGGTAAGTTTTTTCCATCGTGTCTACTGAGGGGCGAAAAGGGATGTCGGAGATCGCCTCCCCGC	14.3796	13.7276	regLM
gen_4164	CTTCGGTCTTTTATGTACGCCGAGATTTCAATGGTTTTAACGCGGGCTGTGAAAGCAATTTTCATCATTGGTTACGATCA	17.832	15.6558	regLM
gen_4091	GACGTGAGAGTGGGGTAGGATGATGTCCGGACGCACCATGTCCCGCGAGAATCCTTTTCTTGGATCAGGTCCGCGGAGGA	16.0803	14.2341	regLM
gen_4119	CGATCAGAAGTGTCAGCTCGCCTGTTGTGGGGATTTGGTCATGACTGTTTCGCTGTGCGGGGCGGCGTTCTGTATCCGGT	13.5904	13.2122	regLM
gen_4124	TGGGTGAGGAGGCAAGAGTTTTTCAGAGATGGGTGCGCGGACGAAGGGATGAGGACTCGTGAGACCACAACGCGCCCCGG	16.9579	14.7935	regLM
gen_4777	TGGGCAACAGGGTTTAGGGTAACGTCGGGTCGGCGCGACGGTGCTGCTCAGTATGTCTTTCGAACGGGTAGGTCGGCAAG	15.7154	13.7092	regLM
gen_4813	CCGATTGTTAATGAAGTAAGGCGAACACTGCCCGAGTTTACCTTCTCCGTAGACATTACCCTACAACTAACGTCGGGAAG	16.1078	14.6572	regLM
gen_4524	GTGCCTAATCTGGGTGTCCATGTCACGTTAATTGGAGGGGATGTGGGGTTTTGGTGGTCGGGGACCGTTGGCGGCGCATG	13.5252	14.217	regLM
gen_4349	AAGGCGGGCGCTCGGGGGCTATCAGATGTGCGAACGTCGAGGGGAGCTGAGTAGCGGGTACCGCGGGCGGAGCAAGGTCG	16.8544	15.5642	regLM
gen_4310	TTGTGTGCATGGGTTTAATGATCCGCGAGTCTTGGAGCGCGAGGGTCTTCTAGAGGCAATCTTTTTAGGCTTCAACACGA	17.6826	13.6473	regLM
gen_4983	AGAACAAGCTGGACGTTATGCTCTGCCGTACGCGCTCGTTACCCGGTTAGGGGTGTGTTGGTTTCATACAGTGAAATCGA	16.6682	13.8696	regLM
gen_4793	TGAGACGGGGCCGATATAAAAAGGGCTTTGAGTCTGGTCTCAGCAGATATTTTAGCACTGCCAGTGTCGGGGATCCCATG	14.8606	13.9465	regLM
gen_4315	TTGACACGTGATATATTCTACCGGATGATTGGTGTCAGCTGTGGTCGCCCCCGCGGGAAAAACTGCCGTCTCTTATCCTA	15.4269	13.4395	regLM
gen_4981	TTTTAGTGCTTTTTTATTTAAAACATCATGATGATATTGCTGTTAACGTGGGGGACGCGCGCCGCGGCCAGGTGGCGATA	14.0571	13.0539	regLM
gen_4908	GAAATAGGGGGTTGGACGACTTGGCTCGGACGGCGGAGAGCTGGTGCGTGAACCAGCCGCGAGGCCTCTATTTTCGGCTT	15.6834	15.2737	regLM
gen_4003	GATAAACGAAGGCGTTGGGTAGTCCTGTATGCGCCCTGCGTGATATATGGTAGAAATTGACGCCCGGCGGGTAATAGAGA	15.803	13.0818	regLM
gen_4243	AGTAGATCGTTAAGCGGGGGATTCGCGGCCAAACGCATTTAAAATATAGAGCGGGCCGTGCTGCGCCTCAAAGGCTCCCA	15.3608	14.2572	regLM
gen_4065	TTTGTGACGGATCCATGATATAAGGAAAGGTTGGGATGGGTTCGTGTAGGTTCTCGTTATATACGATCTGTGTTGTGTAG	15.0754	12.7951	regLM
gen_4867	GGATCGGGCTGGTAGAAGGTGAAGGGTTGAGCTAGTTCCACTCCCTCGCCGGGCGGCGGGTAACGTAGCGGAGGAGCTGG	17.0125	14.0017	regLM
gen_4719	GGAGCTGATGGTGTGCGGCGTGAAGGGGTGACTCTCATCAGCGCGGTTGACGGGAGAGGAGTTGCGGTTTCGTGCGCTCA	16.6141	15.9002	regLM
gen_4312	GGTGCGTGTGACCGGATCGGTCCGGAATTCTTCGAAGGGAGGAGGTGGACTGGCTATGGGACGTCGCGGTTTTTTCGTCT	17.2149	15.1895	regLM
gen_4570	GGGTTGGATGTTCGGCTCTCCCGTGTGGCAGTGGGACTTTGTGCGAGGCTCGATTAGGTCGATGGTAGATCGGACGGCTT	15.1309	12.9917	regLM
gen_4476	CTCGGTCTAAACTCGGTCGTCGCATCTGTACCCGCTCAGGGGGTGTAGTTTGGTCCGGATTACTTAGCTGGGTGGCGGGT	16.6375	16.5271	regLM
gen_4122	CCTTTGATTTGCTCTTACGCGTAGGCGGGAAGGGAATGAAGCTAGAGACGCACGGGTCGTCCACCGGGTTCCAGGCATCA	15.1585	13.4748	regLM
gen_4602	GTAGCGCGCTCTATCCGTTCAGGCTGGGCGCCGTAAGGATGTCACTAAACCGCATGGGGGGTAAGGGAGGAAGCGGGCGT	16.1196	15.6726	regLM
gen_4700	TGTTAGCAAGGCCTAATTGTATTGGAATCTGGGCACTGGACGGGGCCCCCGCATAGCCGGCCGGGGTTCGGCAGGGTTAT	13.6704	12.8382	regLM
gen_4584	CCCACTGGATACGCGTTGACATGGGGGCATGGGCTTCGTTCGGCATGTCGCCAGGGGTGGCTGCCCGTGGGTCGTCAGGA	16.0663	15.5825	regLM
gen_4663	TGAGGATCGTCCTTGGTAGTAGAGCCCGCGCGTAGATACAGGCGAGTAGGCCCGAGGGGTCTCGGGGGACGGGCTGACCT	15.6214	14.2026	regLM
gen_4067	TCTGTGGAGTTTCGTTGATCGCGGAGCACGTCGGTTCACGAACACAGGCTGGGATTCAGTGCCGCGGCGCATAGATACGA	15.8228	13.4404	regLM
gen_4997	GGGTCGTCGCACAGGCCTGCCCTGTGACGGCGGAGGATGTGTGTAGCGCGCAGGGACTTGCGGGTGGGTCGGCGTTCAGG	16.7068	15.6078	regLM
gen_4179	CTCGTGGCGGGGAAAAGTGGGGGTAAAGCCCAGTACAACCGGCGCCTCGCGGTGACATTTATTGGGGCTAGGCCTGGTGA	16.1673	14.8109	regLM
gen_4960	GGTGATGCATTTCGTCTCCGTGTCCACGGGTATGCAGATTGCGTTGTATGCGGTGTGATTGTCTGGGAAAATTTCCTTCT	14.574	13.3889	regLM
gen_4868	CACTAGTGTAGGTATTTCCGCGGTTATGCGCACGTGTCTGTGGGCCTCCTGATACTTTTTTACGGACGTGCCTACGCGCT	15.8751	13.0456	regLM
gen_4893	TTTGTAGTTTTTTCGCGTAGTATATAGAGCTTGTTCACTCGTCGTCTTATTTATCGATCAGTGCGAGTTAGTGCTATTGG	13.9633	12.8711	regLM
gen_4725	GGTTCCGCTTGGGGGCGCACGCGATCCTGAGCGTGACCTGCTTGATATCTGGGATGGTCTGTGGAATTGTAGTGTGCACA	15.6276	12.8474	regLM
gen_4738	CGTCGCTTTAACTCACTGTTAATGGGCGGGCGCGATTGTTAGGGTAATGTTTCATACAGAGCACCCAGCAGGCGGGTGAT	16.4601	14.9118	regLM
gen_4241	CGCTGATTACGACGAGACCCGGAGACCCGTTTTTGTAATTATGTTTCTAGTGAAAGTTCTTTTGTCGGCTTGGGTGGATG	15.7443	13.5343	regLM
gen_4934	GGGCCCAAGCCTTGTCGCTTTGCCAATAACCGATATTAGCGGGGCTTACGCTGCGTTCGGCTCCAGGTTGACTCGTCTGA	15.1596	13.6183	regLM
gen_4425	AGTTTTCCCCGTGGATGCTCGCGATGCATTCTTCTGGCCATCGGCTCGGGTCCCTTGCCGAAAATAAGTGCGCCTCCGAT	15.8775	14.0779	regLM
gen_4714	GCAGCCCTCTAATCGTGAGGGGGAGTTGGGCTGGGCCCCGTAAATCGGTGGTACGACGGAGAAAGGCGGGTAGGTCCACA	15.6493	15.1202	regLM
gen_4487	TTCGGTCATGGCTGCCACGGAGTCCACGGCTCCGTGCGCGATATCTTGGTGCGTGGTTATGGCGTGCTCCGCTTACGCGT	15.5148	15.4311	regLM
gen_4851	TTATACTTTCTCTGTAATGAGTATTGTGTTCCCTGGTAGGTCGTGAGTTTTTCTGATCTCTTGTTTCTTAGCGGATCCCG	14.5595	13.0441	regLM
gen_4224	GGTGCGTGCATGCGGTCGGCAAGGGTAGGCGTCCCACGTGTGTTGTTGAAGTTACGGATAACCAGGAGTCTGCGGGATGA	15.5198	12.4227	regLM
gen_4788	CTTTCAGCGGGGGTAGCCTCGGATTATGTCAGTTGTCCCGCATTATGCCGTTCTATGAGATGTTTTGACGGTGTATGGGT	17.4355	16.0185	regLM
gen_4591	CGCATTATTGTTTTTGTAATTTCATGTTTTCGGTCTAGCAGCGCCGCTTTTGTCCAGCCCGGAGATCTGTACGACTGTAC	16.102	14.5149	regLM
gen_4585	TGCTGAGCAGGGCAGTCGGCCGGCGTTCGGCTCGACCTGTGAGAGTTCCGACATATTCCGATCTTAGGTGGGTCATTTTC	15.4865	13.538	regLM
gen_4770	GCAGATAATAAGGTAGTGCGGGGGGGTTTCCTTGAGACCCGCCTTAGCGGAGTTTTGGTGTGCCCCGGGCACGCGCGCAG	16.2857	14.7987	regLM
gen_4547	GCGTATTGTGCGCGACCGTCACCCGATCCTTTGCTATTTGGTCTGTCATCTTTCGGTTGGTTTGTTAGCTTTCAGGTACG	15.2379	13.6243	regLM
gen_4656	GGCGCTGATCACGTTAGGGAACAATGGTAATTACTTGGTGGATTCTAGAGGGGGGCGTCCTTAATTCGGCCCCGCGGCGT	13.5576	12.4279	regLM
gen_4545	GGTCCCGCTGATTCTTTATCTGTTGTATGGGTGTTTTAGCCGCTGTTCTTGAGTCCCTACTTCCTGAAATGAGATATAAA	15.3423	15.8976	regLM
gen_4730	GGACGTATCGGGGCTGTGGGCGGGCGTTGTTTCAGCGTCCCGCGTCGGGGCCCTGAGGCAGGTTCGGGGATGGGGCTCAA	17.5621	15.9099	regLM
gen_4940	AGTCATAGGATCACGCGCTCATCGCGATAGAGGCGGCGACCTGGCCGTCGTGGGTTGCGGTGTCGGTACCGGCATGCTCG	17.5777	16.0248	regLM
gen_4143	AACGTGCGGCGTTATTCCCCGTGCCGGCCCCAAGGTGCATGGTTTGCTGCCTAGACCGCCTAAGTGGGGACGGGTTGCGA	14.1141	14.2109	regLM
gen_4456	GGTGTCATGTAATTTTTCCTGTGCGAGCGCGCCCGCTTGTCTTTCAGTATCTGGAGCTGTTCTCGTTGCGAGCGCTCGAT	17.3801	13.9042	regLM
gen_4556	TTTCTGCGGTATGACTTGTGCGGTGTTTGCTCGGTGATCTGACGCTCGGGAGGATACTCTGGTCAACGGAACGGCGCCAG	14.6968	14.4937	regLM
gen_4004	TAGTGGGGAGCTTCATGGCATTGACCGTTTTTGTGTGTTTGCGCGCGGCGTTCTCACCGGAGGCGGTCTATCGTGGGGCA	15.4407	12.9267	regLM
gen_4029	TCGCGCGGTGAATGCTATTCGGGCTTTATTTTTGGTTGTTTATGGAGTGGAAAGCTTACGCTTGAGAGCCGTTCTCGCGT	16.0364	13.2495	regLM
gen_4385	TGGTGCCCTCTCGTGAGGGCAGAAACTCCTCCGCAGCCGTCGCTTCAGGTTTCATCGGTGCTCGGAGGCGGGGTCGCGTG	15.5473	13.6625	regLM
gen_4522	AGGTGTGCGGACGTAACACGTGTTGTTGTAGCGGTCCGGGTACGATGCGAGCCGCTGGCTTACTTGGGTTGCGGGGGGGA	16.729	14.7681	regLM
gen_4818	TATTTTGAGCTTAGGGTTTACACCTCTTTGGAAATATGTGGGAGCCTGACTCGGGGCGCGCCAACTGGTTTGCCAAGTTC	15.6043	13.4476	regLM
gen_4219	TCGGCCGTTCTTTGTTTTTCATGGGGGACATTAGCCGGGTGGTCTAGAGCTAGCTTTTCGGGCCCGATAGTTGTGGTTCT	16.3717	14.8182	regLM
gen_4501	GTTGAGTAGCGGCCTGCGTACAACCGGAACTGGAGGAGCGGGTGGACACCGTGTCGACATCGGTGGGGGCAAGAGGTGGA	16.0404	14.4864	regLM
gen_4731	AGTATGGGGCGTGCTAGCTATTAGTCGGGCCACTATGTATACGCGGGGCCGGGCAAGCCTTAGGGGGAAGTCGTGGTTCG	14.4888	12.9131	regLM
gen_4620	GAAGCGCGTGATATCGGATGTTGTTTGCACCACCGATATGAGCGAGGGTAGACCGGAAGCCGGGCGACACGAACAGGGGA	15.677	15.7218	regLM
gen_4490	CAAAACGCCGCGTGTAATATTTGGCCCTGGCGCGTCGCATTTTTGATCCGCGCACGCAGCGGTGCGGGGCTAGATGGAAC	16.7323	16.005	regLM
gen_4316	TGGATTTCGTCGCGGGCGCCAGGGCTTGAGGCTTGGTCTGGCGAGAGGCGGCTGCTTCTCCCCCGCGGTAGTGGAGCGGA	14.4955	14.6603	regLM
gen_4985	CAAGTTCAAACTCGGAATCGGCGACTCCTCCCGATTTTCAACGTACCAAGTGCTTTATTTGTCCATACGTCTTGAGCTAC	15.741	14.2169	regLM
gen_4087	GATTTGAAGATCTTTTCTTACGGCTGCTATGCTTTGCCTCCCGCAGCTTGTGGGGTTGCGGGCAACGGGCCTGGCTTCGA	17.7801	15.2192	regLM
gen_4945	CGTCAAGTGCGTGGAAAGCTACGGCTAGGCGTTATACGATCATTATGTAGGGCGGTTGCCGAGGCGGCCCCTCGCCGCCT	14.5696	13.1032	regLM
gen_4464	TAGTGTAAGTGTGGTCCTTTAGGAATACGGGCGGGCACGCCGATCAGGCTTATTCCTGAGAGGCGGAAGTGGTGCGGCGC	14.4235	13.0046	regLM
gen_4200	ATGGCCAGGATTCGGCACACGGTAATTCTGCTTTCGGTTGGCTCTTCTCGTCTATTTTCTTTGTTGCACGTGCTTGCGCG	14.7904	13.1188	regLM
gen_4194	ATTTAGGACGTGTGGCGAACGTGTCGGGCCTGCCGAATCCACTGGCGGTTCGGCGCATCTTATACGGGTGTTCAGGTGTC	18.635	15.923	regLM
gen_4671	TTGATCCGGAACGAAAGGTCGCGGTGTGGCGATAGGAGGGACGAGTCGGGCACTCGGATCGGACGACTGTGGATCGGTGG	16.928	15.3695	regLM
gen_4685	CGGTGCAGCCGGTGCCGTGTCGTGTGCAAACAAATGAGTTCGATCTTTTGAGGAGTCGCACGTCTTGGCTTGCAGTCGGT	16.2424	13.8624	regLM
gen_4631	CGACTCGCGTATCGGCCCAGGCCATGCGCCAGGAACTATGGCTGGGTGGGCACAATCAGGACAGGAGAACTTCGCAGTAG	14.6091	13.9167	regLM
gen_4834	CGGCCGGTGTACGGTCCCGCCGACGTCAACGCAACAACATTAGCTGCGACTGCCCTGGGCGCCCCCTAGGTGGAAGCGTA	14.2908	14.4982	regLM
gen_4518	AGCGTACCGTAGCATTATGTACGAAGATGTTGTAGTCCAGTACTTATGGTAATTTGAAGGTATCACCCTGCTTGTAGTCA	17.3114	13.4195	regLM
gen_4343	GTTTCTACGGCACAGGAGCTCCGCCGGATGGAGCATGTGAGCCTGGTTCGGGATGGTGGGAGGGTACCTCCCGGGTTGTC	16.6115	15.5829	regLM
gen_4391	TTATCCGCGTATGACCCTCGTCGTTCTCTAGGGAGGTTTATGGGTGGAAGTGTGTGTCACCACCGGTTATTGTACGCTTG	15.8065	14.1121	regLM
gen_4638	CCTGTCGCTGCTCAGTCGGTGAATAGGCTCGCGGTCACTTTCGCGGGGGGGCCGAAGCGAGCTGGACCGGCAGATTGCTT	15.2245	14.3612	regLM
gen_4061	ATGGCCAACGGCATCTGCGCCACGTTAATGTTATCGAACGCTGCGCGAAGACACAGTATGAGCTCGGGATGATCGCCCTC	16.3139	14.438	regLM
gen_4008	GGAAGGAACTGCCCGAATTAATAGCGGCGCAGTAGCCTGGCTATCACGTTCAGGGGTACCGCGTGACGCGGATAGGTCGG	14.8996	14.268	regLM
gen_4832	GGATCGTCCCAGTTTGCGTGTGTCCTGGATCTATGCTGCGCGAGCGAAGCCGCGGGAAATAGGCTGCTAACTGGTGGTGA	14.3416	12.7895	regLM
gen_4840	TGGTTCTAATATTGTCGCGGATTTATGGATTCCCGAACGCACGCTCTTCCCTCCGCGTTGAAGAGATACTTCATAGTTGG	14.6731	13.6154	regLM
gen_4104	TCGCCTATCCGAGCTAGTGAGGCCATGCGGGAGTCAGGGCGAACGGGTGTCGATCGCACGTGGCCACGCGTTGGCTGAAG	17.0899	15.792	regLM
gen_4402	TCAGTTGCCTGAGTGAAGGGGTTCCCCTATGTGGTCAGACACGTTATTTTTTTAGATTTCTCTGACGGGTAATAAATGAG	15.2453	14.4804	regLM
gen_4321	GGTAGGTGCGGCATGTATGAATGGATTTCCGTCACTTTCGGCGAAGAGCGATCTCGGGACCCAAACGCAGGAGCACGTGA	17.2892	13.9836	regLM
gen_4444	GTTGAAACTTGCCGGTGGCATCTCCCGCGAAGATGAAGAGCCGTTTTGGCTGGGGAGGGTTCGTGTTGGGGGTGTGGGTG	16.1596	15.0196	regLM
gen_4820	GTGGGAGAACATTTTTGAGCAGCTCTAGATCGCTTGTCTGGGCGTCGCGTCACTTCGGCCTGTGATGAAACGTCGGCCAG	16.469	13.5844	regLM
gen_4019	TGGTGGGACCCCTGACGGACTTGTGGTACGCGCCCATCTTCAGGACGAGCTGTGGGATCGGGCTGCTCGGTGGGTGCTCC	15.4261	14.866	regLM
gen_4058	CAAAATGTTTGTCGGATCGCGTGCTTTTCTGTTCGTGTACACAAGATCCGTGGCGATTGCGCCAGAATCGCCGCGATTTG	15.5854	14.3664	regLM
gen_4571	TCGCTTGACTAGCGCCGCCTACCGTCGGACCACTGCGTAGGGGGGCCTCGCACTACTGTTAAGAGTTCCCATCGGCTTCA	13.3559	13.1489	regLM
gen_4446	AGGCAAGCTGGGTCGACCGGGGTAATAGGGGTCGAAGAATGTCAGAACGGCATTCACCGTCGCCAGTTGAGGCGAAACTA	15.1395	14.5295	regLM
gen_4509	CCAGCGGCTCCGGTGGGTTCAAGGTCCGGCCTGGCCAGGGTTAAGTTGGTGCAGACACGGGATTGGCGGGCCACGGGGTG	15.5296	15.1722	regLM
gen_4023	GTGTAGTCGCGGCCGCGCCATAAGCTGTACGAGTACGGCCGTTACGGTCGCGTGTGTGGGTGTTAATGGACGGGGGCGCG	17.9639	16.5185	regLM
gen_4273	GTCTCCTATTCACGGTGACTAGACATTTCTTGAATTTCTGCGATTTTTGCAGGCCGAATACGGTTTCGTGCGGCAAATGA	14.0748	12.4373	regLM
gen_4514	ATTTGATTTACGCGGTGAGTATCAGGCCGACAATTTGTTGGGGTGCTCATGGTATGGTGTGCCGTGGAAGGTGGGCGGGA	15.4741	14.6062	regLM
gen_4860	CGTTGGGCCAACCATGTGGCGCGACCTGTTGCGGCGCATCCGGCGTGCGGAGTACAGGTTAAGAGCGATCGCCTGGGCAA	15.247	12.531	regLM
gen_4532	CTTAGGCTGTGGAGTAGCGACGGAATGGGATCCCCGTGAATCGGGGACTGGCCGGCGTCTGGGTGTGGTACCGGGGCCAG	15.2354	14.5376	regLM
gen_4902	GTTGGCGGTGTTTTAGGGGCCTGGTGAGATTGGGCCCTAGCGGTGGCACGTGGGGCAGGGCGGTTGGGCGGCGGCGTCGA	15.0775	13.6544	regLM
gen_4929	AACCAGTAATCGGGGTGCACTTTCGAGGAGGTAAACGGGGCGTACCTACGTAACGGTTCCGCCGGGTACTAATCGTGGGA	17.0587	14.3625	regLM
gen_4800	GGGTGGGGGTAGAGCAGGCAGCGCATGGTTTCTTGCCGCGATATAGGCAGTCTGGGAGTAGAGTGGACGGTCCGGGGGGC	14.3254	13.3713	regLM
gen_4133	CGTTACCCGGATGGAAAGTGGATCAGCCGATGATAGGCGAGGGCAGGGGGGGCCGCGGTTGCATGGAGTGACTAGCGGTA	18.1482	16.6473	regLM
gen_4883	CACGGGGGTTGTATGGAAACGGGTGTTATGTAGTGTCGGATCGCAAAATAGTCCCGGCCGCCGGGAAGTTGGGCAGTGGA	15.3119	13.7254	regLM
gen_4804	CGTGGTGTGTGGGCTATGTACTCGGTTCGCCAGATTCTTTTAGGCAACGAATCCACCAGGGCACACGATCGTGACGTGAT	14.8595	13.4666	regLM
gen_4420	ATGTAACATGCCGTCACGCTTCCGGGGTGGGCTACCGAGCTTGAGCCCGAAGCCTGGCCCTAGGATACCAGTACTGCTTA	14.2466	13.7394	regLM
gen_4660	TTATTTCCGCACGTGCATGCGTCGGATAATGTCTCGCTATCAGCTTTCCTGCCCGCTCCTTGCGCCCATGGGACCCGCTC	17.5561	15.6555	regLM
gen_4765	GTGACAGGGGATTGTCAGTTAGTTGACGGAAGGAGTCCCGGCGCCGGTGCTTTGTCCCCCGCGGCAGCGAGGACGGTGGA	15.2619	13.3059	regLM
gen_4843	TAGGTGGAGGGAGAGATTGTGACCCGGCGCGTACCGCGCCTGGGTCGCGGGAAACGGAAGGTGATGAGCGTACGGGTCGC	18.4492	15.6727	regLM
gen_4097	TAATGCGTTGTTTTCTAGTCTAAAACGCGATATCACTGCGGGCTCCGGTGTTTCACACGAGGGGGAGGTACCAGTCTGCG	15.6858	14.3635	regLM
gen_4749	AGGAGGTTTCACTGGGTACGTGCCGTATTTTCTAGCGTTATATCTGCGTTAAATTTTCCTCGGGAGAACAGCGTTCCCGA	15.0759	14.2556	regLM
gen_4720	GGGCTCAGGATACCACCAAGCGTAAACTCGCGCACGTGTTAGGACCGAATCCAGCGACACGACACGGGCAGTTTGGTAGT	16.8303	14.539	regLM
gen_4689	CGGTTACCGCAATGGATTGCCTTGTCGGCACCGGCGGGCCTCCTCGTGGCGAGCTCGTAGAAGGGTGGCATGTCTGCGGA	15.6534	14.5059	regLM
gen_4424	GGTAGTAGAGGGTTTAGGTGCGTGTCCGTGGGTGAGTTCCCCGGATGTCTGGTGGGTGAGCGAAGTGCTGCGGTTGAGGG	16.002	15.1181	regLM
gen_4174	CGAGTACGTGCCTGGGCAGGGGGTCAATTTGAAAAATTACGATTATTGGTAGGTCCCGCCGGAGGGCAGGGACGGGAGTG	14.7436	15.6196	regLM
gen_4609	TATTTCCGTCATGACGGTAAGACCCGAATTTTGTAATGTCGCAGTAGCGTAAATACCTCTCTCGTGATTAACGACATGAG	17.2599	14.6079	regLM

## Sheet: README
Supplemental Table S3: 200 selected synthetic yeast promoter sequences generated by regLM for each of 5 prompted labels.
