# Supplementary material for: Designing realistic regulatory DNA with autoregressive language models
Source: HighWire-hosted journal article supplement (doi:10.1101/gr.279142.124), 2024-09-01
Supplement: Supplemental_Table_S4.xlsx [file Supplemental_Table_S4.xlsx]

## Sheet: Supplemental_Table_S4
	Sequence	independent_complex_pred	independent_defined_pred	Group
DE_297983	GGACAGTTTTAGTCAAGGGGTTGTAGTTTGCTAGGGGAAGCCCCTATTTTCTATAGCGTCAGATCGGCGCAGGCGGGTAA	14.8949	14.2709	Evolution
DE_358230	TACAGAATGTGTTGCAACGGAAAGTGAGTAGTCCGGTGTCGGGCTTAGGGAGGTCACGCAAAACGGGAACCGCGAGATGT	16.596	15.0976	Evolution
DE_291595	TGAATACTGAGTACGGCGCGAACGTAATTCTTAGTCTGGGAAATTTAGTGAAGAGTGATTTGGTCTTCACTGGGTCTCCG	15.3042	12.5312	Evolution
DE_417272	TCTTTCGGTGTTATTTACCCGGCGCGGAGTATTTGCGGGCTTTTTTCTTTTGGGCCTGAGTCAACTACTCGTTCTCTCGA	18.4465	15.6765	Evolution
DE_401011	GTAATTCTGTATAATTTTCTTGAGGCATTTTATAATTCAAGTATATATGTCTGGGCGTTACTTAACCTTATGTGCGCTGT	15.1167	13.8351	Evolution
DE_366074	TACATCCGAAGGTTATAAATACATCGTTGTAGACGGTCGCGAATAGGTCGGTGGTCAATGCCGCGCGAGCAACCTACTCA	17.8333	15.6645	Evolution
DE_331605	GTCTTTCTCGGTAAATATTTCTCTTGCTTATATAGGGCTTCGGGGTACGGGTGCTGTGAATGCAGTAAGCCCCAGGAGCA	17.0532	14.362	Evolution
DE_309330	CTTGCGATGTCTTGATTTAGTCTTTTCGTAACTTATAAACCGTAGAGCATGATACTGTTAAACGAACCGGGTCCTAGTGA	15.8781	14.0808	Evolution
DE_456516	TGACGGCCGAGAATCATTAAGGGTATTGAATTCGTTCAAAGGGATTCTTGTCTTGCCTAATATATACTAGATTATATGCG	15.4735	14.6112	Evolution
DE_424470	GCGATTCTTGTGTAATTTAGTAAATCAGTGCCGTTTTGTTCTTGTTTTTCACATTTCTTAATTGATCTTTATGGTTCCCC	14.1122	14.2	Evolution
DE_328795	CGCGGAGAAAAGTCATTTTAACAATGGGATATCGGCTTTTTTGTTAGGGCTCCATTGTGTAGGGTCGAAAATTGGCACCG	16.7589	14.7806	Evolution
DE_291128	GGTCGGTCACGCGTCGATACCCCTCGTTTGCTAGTCGGTGTTTGGATAGTCATAGGATTAGCTGTTCTGCTGGCTGCGTC	14.0676	13.0534	Evolution
DE_319355	ACGCGCTAAATGTACTACAATTGAAATTATTTTTTCAGACTTTCGCGAATTTGAGCTTCTGCTATCGGGGCATGGGTGGA	17.2099	15.1958	Evolution
DE_307304	GGTTTTAACATGGCATTATTTGGTAGTTGGGAAGTAGTACATGGTGGACGGAGCGCGCTGCCACCGCTATATTCAATCCG	15.49	13.5375	Evolution
DE_286481	GATACTCTTATTGCCGGGTTACTACTTCTAATTACAAGTCATCTTGGTCTCTAGTACGTAGATCATATATATGAGCTGGA	14.4961	14.2819	Evolution
DE_307735	ATTTTCACTTTCTAATCAACGGACCGCTCTTCGTACAGAGTGCGCGCTATAGCATTTACGTGGTTCGCCTTGTGGCTACG	17.0936	14.4992	Evolution
DE_445321	TCTTCCTTGACGAAAATTTTCAAGTTTCAGGGGTTCCAGTAGCTTTCGGGGGTCCGCATCTGGGGGTATTAAAGGTACGA	14.2811	14.7359	Evolution
DE_448668	TAACAGATTGCCGTGGGAATCCCTCTTGTTAGTATTTAGGTCTTGTCTATCGTCTTGTAATTCTACACGGCCGGAGGCTA	15.6794	15.7165	Evolution
DE_356682	CCGATACTTGGTGGGTTCGCCTCTTCTTGTTTTTAAAAGCACAAAGATGTCCGGTTACTACGCGTCTTCGTCTGATCGGG	14.867	13.9443	Evolution
DE_311368	CGCGCAGATACTCGCTTCCGCTTTGTACCCTACCAGTATATAAACTACGTCCTCGATGCGCTTCGTAGTTACTTTGGATA	16.9108	14.6359	Evolution
DE_359971	TACGCGAGTTATATATAGTTATAGATATTCTCATTAACTTGGCATCGTTCTTTTTGAACGAATAAAGGCTGGGGTTACCC	15.7998	13.7765	Evolution
DE_365707	GAATTATGTATGCCAAATCTCTTGAGATCTATATATAGCTTCGAGTTTTATAGAGTAATGAACATAGCGTCCTTAAGCCG	15.5948	14.3294	Evolution
DE_287921	CATAGGTCTTGCTATATAATGAGCCTGACTAGTAAGTAGTGTATATAGGGAGGCGCAGTGGTTGGTGCAGGAGCAATCCG	15.6903	14.3664	Evolution
DE_443836	TTGTCTTGTTCTCTTGAATAATATTTAAGCTTACTATAGCATTGACTCGGCTTTGTCTAATTGGCCGCTTTTTCATGTTC	15.4168	14.8527	Evolution
DE_297741	GTATATTCTTGGATTTCGTAGCGCACATACTTATATTGTAGCAGGCCGGCTAATGAGGTTCTGTTGTTTCGCGCAATGGA	14.8187	12.7196	Evolution
DE_417402	CACTCAAGACTTTGTCCGGGAAAGCAGTTTGCGTATCGATCGTTCTCGGCACATTCTCTTCAGGGGCACTAGCGCGCGCA	15.1576	13.6189	Evolution
DE_292571	TGATATGTCGTCACATTGCTATAAATATCTGTATAGTTAGCTTTATATAATGCTCATACATTAACGACTTTGTTCCTCCG	15.5451	13.6639	Evolution
DE_423259	CATGGAAGTTTACGCGCAATCATTCACTACGGGCCGTATAGCCAACTATAGAGAGGGATGTGGTGTACGAATTGAGCATA	14.2445	14.4515	Evolution
DE_385411	ATCTCAATGCGGCCTCTTGTCGCGTATATATATTATATAACTTTTAAGTTTAGTAGGCCAGCACGTCCAGCCCTGTCACT	16.4601	14.9092	Evolution
DE_350467	TCTTACGAAGTAAGTCTTGTACTTATCCTTCAGGACGGCGAGGGCGCTGGAGGGTGAGCGGGGTGTGGGCAGGTTACCCA	16.8638	15.5709	Evolution
DE_293678	GCATGACTGGTTGAAAGGTTCAAGAACCCTCGTGCGGAGTCTACTGAGTTCCGTGGCTATATATATCGTCTTTGTCTCCG	15.314	13.7108	Evolution
DE_377252	GTTGCCGCGGCATAGTATTTTCTAACAGGCGGTCATTGTAGTCGGCACTCTCGTACGTTCTGGTTGACGGGAAAATGTAT	15.4386	12.9122	Evolution
DE_327256	GATCGTTGACTATTCCTATACTCCGCTTCGCTTCGCGTCCTGTAGTTCTTACCGGGCGGATTGTTCCTTATAGTACCCGA	13.81	13.0048	Evolution
DE_351693	TCGGTTAGTTTTACTGACTCGAGGTAAACGTGGTGTCAAGGTGTTTTTGATTTTCGCATGTTTGGGCCTGCTCGCCCGTT	17.4341	16.0214	Evolution
DE_395807	ACGTGACTGTATCCTTTTTTAGTATTGGATTACGTAGGGTACCGGTGAAGTGAATTTGATATCGGCTTTTCGTTCTCAAA	15.3608	14.2529	Evolution
DE_292937	CGAATCTGCGCGGCATCTGCCATACTTGTCCGAAAAGTGGTGTCTTCTCGGTCATCCTTGAAAACTTTTAACCCCTTACA	16.9662	16.6446	Evolution
DE_402694	TTGACTTACTAGATCTCTTGGTAGTATACTTTCTTAAGATCGCAATTCCGGCCGTCGTCGATGACATCTGTAGTCTCTCG	16.5256	13.8438	Evolution
DE_307967	ATCCCTGTAGTCGCGGCATGTTGTGCGCGGGCAAGGTGAGCGGAGAGACCACTGGCAGACGGGCCGTGTATAGTGTTGGA	16.7227	15.9911	Evolution
DE_320386	GTTGCTTTTTTTTTTTCGGTGCAAGGGGGACAGGGAAAAAGATACAGCGTTGGATAGACTCCGGTGGCTTTGAGATGTTA	15.9903	13.6275	Evolution
DE_382263	TTGGAATTTCTTGTCTGATCGCGTCAATCTTGTTCGTAGTCTTGTGACGCTATGGGTGTAGTATTCTGTCAAAAATTCGA	14.7118	14.5036	Evolution
DE_418924	TTGTACGAGCATGAAAAATTTCACATATGATCGAAAAAGGGGCAAATCGCCTACCTAGTCCACTGGGCAGCTGCTGGTGT	15.9999	15.1202	Evolution
DE_396217	TAGTATTATTCTTGTCCGCAATATTCTTGTAGTTAGTTGCCGTATGTATTCGGGATGATTCTCGGAGCCAGATCACGTAG	15.6191	14.2123	Evolution
DE_356994	TAAAGACAACGCGAAGTTCGGATGAGTAGACTTGTTCCAGCGCGTGGTTCGAGGTGGACTGGGGGCCTGCGGTGCACGGA	17.8991	15.3454	Evolution
DE_459851	TCGGGCAGTTAAGTATGCGACGGAATGACTATATGGATTTCTTGAATTTATACGCTCTTGTCCCTGTGCTACAATATCCG	16.4559	13.5893	Evolution
DE_384244	TCCGCGGGATTAGCGGAAGTTCAACGCGAAAAGGGTTAAGTGAATTTTGTGCGGGATTCAATAGAGTTCTCCTGGTAATG	14.7277	14.418	Evolution
DE_288540	TGCGGATGGCTAATATCCGAGGATAGGCACTTCAACGTCCGTGTGTAATTACGCGTGTTTGAGGTTTTGCATACCCCTGA	13.5431	14.1994	Evolution
DE_387995	TTTTTCGGCCAATTAAGACTTATGATGTCCGCGTTCCGGGATCATCGATCGTATAGAGTTAGATGGTGAGAGTGGCGCCG	17.5067	15.9593	Evolution
DE_434488	GTACCAGTAATCTTAGTAAATACAGTATATAAATAGTCTTGTCGTAAAGTTAAGCTTCTCAGTTGGTTACGGTGGATCCG	14.7868	13.8785	Evolution
DE_416775	ATTCGGAAAAAGTACTTTGACTAGTTCGGACGCGCTGACCAAGGTAGGGGAATAATGTTGCGGTATCGGCTTCGGCCTGC	15.8175	14.1186	Evolution
DE_371498	TGATTGGTTCAGGTGACTGGTTAGCTCGGGCCTTCAATTAATGTCATAGGATACGAGAAGGCTCGGGGTCCCTTTAGTCG	16.1063	14.6511	Evolution
DE_283454	TCATTGAGTAATTAATTTTAACTTAAACTTATATAGGTGATACGTAGACGTTACCCTAGGGTGGGCGGACTCGTGGTGTC	17.2563	14.6163	Evolution
DE_319752	TATCATCTGTATCATTCGATTTTCTGTTTTTCAAGATTTTGGTCGGCAACCAATCTCGGCTTATTTTTCGGTCGTTTGAG	15.0545	14.3553	Evolution
DE_308452	AAACATTAGGGTATCTTGTTTTGTTTAGGGTTTACAAGGCACTTCAGGGGTATCTACCTGGGATAGACCTGACGGGATAA	13.3512	13.1436	Evolution
DE_350708	AAACAGTATAGAATGACAGGCGAATTGATTCCGAGGAGTAGCGCGTCCGTACACCCTATGTGGTACTACACCAGTATAAA	15.4971	14.0986	Evolution
DE_383112	TTGTACTTTATGGAGTTTCGTAACGTAATGGTATATAGCATAGGAAGCGGTATGGGTGTGTATGGGACAGTAAAGGAGCG	15.4474	14.3931	Evolution
DE_310054	TAGAGTGATTTTTTAGAGGTTTTTTTTTGAAGAGGATCCGAACCGGGTAAGACGTGCATCACATGAACAGGTATCCATTT	16.6662	13.8617	Evolution
DE_407690	GGATTATATCGTCGGGAATCTATTCGCGACATTGGGTTACGGCCCGTATAAACCCTACTGAGAGGGGCTGTGATGTCACC	16.2099	15.3501	Evolution
DE_300057	GCGTTCAGTTATTGCTTGCATAAGTGTGTCCGGGTCATGTGATGGAGGCTGTGTCGGCGCGCGAAGTATGTCTCCGGAAT	16.9554	14.7997	Evolution
DE_312584	CGCGCTATGGAACTGTTAAAGGGCAAATTTTCGCGCTTATCATACTGAATGATATATACCGTATGTTGACACAGCCCGGA	14.3557	13.3788	Evolution
DE_293228	CAGAGGCGCGACGCTGCTAATCGCCCAGAGACGGCACCGTATAGGGCTCGTTGGATTTTTTTTTCTGAGTCTCTTACAGA	17.5529	15.6522	Evolution
DE_420969	TTAACTTAGTCACTTTGTAAGAAATGAATTCCGGACGTTTTTTTTTTTGTTGCCTCCCTTGGGTCAGATTTTCATGAACT	14.0941	13.3199	Evolution
DE_401700	TCCGCGCACATCATTCTATACCGGTAATCCAGGATGAGAGTACAGTGCCGCTTCCTCGGGTATGTCCTCTGCGGCCTCGA	15.7786	14.8359	Evolution
DE_349653	GGTCTCTACGGATACTAATGACTAATGGAGGCGCGCATAATTGAAACAGCGTCGTCGGCTTATATGCAGCCTACTCACCG	14.713	12.8342	Evolution
DE_310309	GCGCTGTGTATAAGGGTATTGACACTAATCACTTGATACGGCCGCCATTCAGAGCAATGTAGCATCCCTCACCCGGGGTA	18.1499	16.6491	Evolution
DE_395577	TATTCGGACTAGCGAAAATTGTCTTGTTTAAGTAACTATATACAGTTGTTATATAAAAACACGTTTGATAATAATAGAAG	13.6188	13.2045	Evolution
DE_428635	GTGCCGTCCCGGAAGTTGTTTACTATGTAAAGGAGACATTTTGGAGTATCTACCGGCTAGGGTCACGCGTCAGTGGTAGT	15.7455	13.8722	Evolution
DE_297247	TACAGCGGAAAATTTTTTTAACGACAAAAAAATGATTGAAACTTTTTTTATCATCCCGCGTATGATTATCTGGATACTAA	17.2964	13.4219	Evolution
DE_300370	CTTGCCGGATCAGATAGATCCGTGGAAGCGCGCAGATAGTAAAGACGGCTATGTGTATGGCTTCCCCCAGAGTCAGTGCG	15.1592	12.9865	Evolution
DE_464481	TACTCTCGGGTACGCGCGCGTGTAGGTATCGCGGCTTCTTAATATAACTGGTGGTTATCCGGCGTTGTAGTTTGCGAGAA	17.3622	13.9043	Evolution
DE_321196	ATGTTGTAGCCGTTGTATCGTCGGTCTTATATAAGCTACGCGTGATCTTATCGGCCCGTATCGTCAACATCACCGGCATA	15.6515	14.502	Evolution
DE_367248	GAATGTAATAGTTAGCCATATTTCAGGTAGTTTGAATGTAAGTCGCGGGCTATGTCGGCCGAGAGGGTGTCGGCATTCCG	15.6197	12.8608	Evolution
DE_338945	TCGCTCAACATGTTTCGGGGTAACTACTAGTAGGTGCTCGTTCAGGGGCTTGAATTGATTTTGTATTCTAGAGGGCCACG	14.857	14.7618	Evolution
DE_316341	GATCGGTACGCGAGAGTAGTTTATGGATAGTTGATTCCTCCTCGTTTAACGCGATACGGCGAGACTGTGGATGATATTCG	16.2374	13.8507	Evolution
DE_287133	GTTTACGCGGTTGATTTGTTGTGCGGGTGGGCATAATGGAAGCCGCTTGGGTTTTTGGGTGGTGCGAGTTGTGTAGTTTC	16.1629	14.8178	Evolution
DE_305166	GTGTTAAGCACTAGGGAGTTAAAGCCCTATGTGATGGAAGTTTCTGAGGTCACCCGGAGTCACCAGAGCGTTTCTCGGCG	16.0868	13.971	Evolution
DE_339939	TGGTTTATGTCATCAGGCACGAGAAGCCGAGTAAATAAATAGCTGCAAGTCTATCATGATGGCTTGGAGGTGGATATCGC	15.3692	13.4928	Evolution
DE_351913	TGGAAGGATCCGTGTAACTTACGGTGTCAATTTTTTTCCGGTGTGGTATGTTGGGTCTCTGAGGGGTAAAACAGTTGCCG	15.9031	14.7073	Evolution
DE_325212	TCTATCACAACAGTCCAGTTTTCGTGACTACTATATCCTGCCCGCGGAGTCTTGTACGCGTCTCGCTTATAAATAACTGA	14.5333	13.0555	Evolution
DE_351264	CTGTAAATTTTTACTAATTCAACGTTTCATTATAACTCTTCACGGGCCACTGACACGGCAATGAGTGGATCGCGCGATAC	16.0293	14.0907	Evolution
DE_357649	TAATGAACTTTTTACATCTCTCGGCCTCGGGTTTGGGAATTCGTCGAAAGGTACATGTTAGGTTTTGCATGGTGTTTTTA	16.9221	15.3666	Evolution
DE_310634	TCTTTCGCGTCGTCGTTAGGGCGACAGTGTGAGTAGTGCTTTTACACGAGTTCACGGTCATAGGTCACCAACCCGAAAAT	16.2837	14.8043	Evolution
DE_284714	GAATGTTGTTCGTGGAAAAGCATGTCGTCGTAGAAAAGCCTAAAGCAGCGATTTAATCAGTGTTTCGGTACGTGACTTTT	15.7504	13.5078	Evolution
DE_388706	TTTAGATCGCCGCGTTTCGGGGAAGTTGGGGAATTAGACCAAGAGTTAATCCGCGTAACGGCACGTTTACAGCCAGGGCG	16.894	14.6964	Evolution
DE_390967	CTGGGTGTGTGGGATGACGTAGTCGTTATATACGGTCAATAGCAGTTTAGATGATTTTTACCGGAAGGGGTATAGTAGAA	15.3543	15.8417	Evolution
DE_327014	AGTAGAGCCGGTACGTAAACTGCCAGAGTCACATCTTGATAAATCGGCATTATCCGGATGATCTGAGTGATTACGGGGCG	15.3353	13.9729	Evolution
DE_384939	ATCACGCGAAAGGCTTTCCGTGCAAGTCAGAGCCTGGGCGCTTTTTTCGCCTTTAAAAGTTTTTATGACGCGATAGACGG	16.3636	14.8122	Evolution
DE_419787	TCGCTTAGACGTAAGACCGTTTCCCGCATGAGGAAATACAGCTGGTACTTTTTTGTACAAACCGAGATCACGTGCCGAAT	15.971	15.2393	Evolution
DE_285183	ACGTTCCTTGTGTGGTAGTCCGTAGTTTCGTAGATAAAGACCTTGTTGTTCATAATAGGGGGTCTCGGGAAGCGGTAGTA	15.6083	15.6634	Evolution
DE_317786	TCCTGAGCGGCATATGATTAAGAGGGATCGGCGGCGGAGTTAATTGTTCGGGTGTACTAATCTCAAAAATAAGTTTGTCG	15.2297	14.3508	Evolution
DE_327957	AGGGGTTTGATAATGTTGAGCGGGGTGTTCCGGAGCATCTTGAGCGGAGAGCATTTAAAGGCCACCGAACATGGCTTGGA	15.6377	15.1323	Evolution
DE_302654	ATGAGACCGTCCGTTTATTGGGCGTTTATGTTAGCTACCCGGGCCTTGACCATAAGTAAGCGCATTTAAAAACTTTCGGA	16.992	14.0081	Evolution
DE_342540	TCGCTCCGCCGTTTGCCCAATTTAATCGTCTTGCATGGCGTTTCAGGCCTAGGTAGTACCACTGGGTTTCAGAGCGGGGA	14.8198	13.4876	Evolution
DE_423813	GACATGAGGTATGGGGTTAAATTATATGACTTTTTCGCAAGCGAACGAGTTTTTTCATTCTGTCACCACACCAGGGGTAT	14.5181	13.4479	Evolution
DE_298646	ACGCGCTCCAGTATATATTTTGCGTAAAGGCATGGCTGTTAACCAAGGGGAGTACGCGTGTGGTTATAAAAGCCCACACA	15.7137	15.2756	Evolution
DE_424033	ATGCTCCGGATAACCGAATGGGGAGGCGTTCTTGGGATCTTTATATAAATTATAAAGTACATTTTTGTTTTCAAACTCTA	15.505	13.9253	Evolution
DE_300623	GGACGGAACCTTGTAGGTGAACGGTCTCAGCGCGCTGTTACGAGGGGTAGTGTCGCAGAGGGTAAAACGGTATTTGACTA	14.7837	14.3828	Evolution
DE_322200	TCGGTTGGAGGTCGCTTCTCAAGAACCAAATTGCTTTCCGTATACGCGTTGATAGATCCGATCACTTTTTCGTGACAAGA	14.5608	13.1197	Evolution
DE_330312	ATCCGCTGTTATGGCGCGCGACCATCATACTATCTCGGACGCCATTGATTGTCGTATTCTTTGTGTCCGACAAAGTCCCG	15.8405	14.3666	Evolution
DE_380492	CATGCGCGAACCATGTAGAATGATAATATTAGGGGGTTGCATCATGTGTGTGGGTTTTTTTTAAATTTTATGATAGATCA	14.3777	13.6827	Evolution
DE_299737	ATTTCTGGTAAGTACACACTTTGGTCCTCCGAGGACGGATGTGGGTGCACCGTCTATCAGAGCTGTGGGTGTTTGGACGA	15.2681	13.6261	Evolution
DE_311179	TGCGCGCGAAAATGTCGAAAAAATGGGGGCTATGTTACCCAGGGTCTGATCATGAGAGCAAGGGGGGACTGCGACTTACT	15.0551	15.1127	Evolution
DE_401538	TTAGTAGTAGAAATTGACAGTTATCTTGGCCCGCCTGTAACTTCCGTGATAAGGTATATTCTTGTCATCTGACTCGTCCG	17.3165	15.5002	Evolution
DE_384546	TCATGTAGTGCCGGTTAATCTGTTATATAAATACACAAGAATCGGACGTGAGGGGGATAATCGGTTGTCGGGTGTAGCAC	15.9855	15.1781	Evolution
DE_418094	AGTCAGATGTTTTGGTTTTACGAAGCGGCTTTGGGGGCTAGTCTCCGTATAGACTCGTGTTCTGTCCGAAAGTGGTCTGA	14.3686	13.8262	Evolution
DE_288189	ACATCAATTCCAGAGTGAAAATATGTACTGTCCGCTATCGGACTTAATTTATTGGAGGCACGTGGGAGGGCGCGCGAATG	15.4978	13.5557	Evolution
DE_317438	TATGGTCTACGGATGTATCTCATTTAGAGAGGATGTTGCAACTGGCATAGTGTAGAAGTTACCCGGAGGGCTGGAGATTA	15.778	13.8822	Evolution
DE_363273	GGTTTCCGCCCGTCTTAGTTGCCATCATTAGTGATCCCCCCTGAGATAATTTTCGAACCACATATTCCGTATTTGAGTTT	14.5452	14.6405	Evolution
DE_327379	GGACAAATCGATAATTCGATAGTTTTGTGCTTTACGCACGGCATCAAGCAGAACCGGCAGTTGGTCATTCAGGTATATAA	16.7048	15.5981	Evolution
DE_370891	ACGTGACTCTATTGATGTTATAAGTCCGCCCACGTGTGGTGTACGCTTCGAAAGGCGGACATGTGTATGAGACCGGTCTC	17.5503	15.9098	Evolution
DE_304321	TCCTTCCAGATATTTTTTCGCGGTCATATATCGCTACGTAAGACAGTTGATTTTCATTGGTTCAACGTTGTGAGTCGGGG	14.6842	13.61	Evolution
DE_385022	CTTGTCATTCTTGATGGTAGTCAAGATGTAATCTTTTCTCGGTCTATATATAAGCTTCCTGATCGTGAGTTGCGCGTGTA	15.6437	13.4637	Evolution
DE_318754	GAAATGCGGAAAGTTCTCATACCGCGTAGCGGGGACCACTGGTAGAGCTTAGATAAAGCGATACCTTCTGTCTGTTTTGC	14.4855	12.9128	Evolution
DE_294786	GTTCTCCCGGTAACCCTGTTGATCTAAGCTCGTTTTCATTTTGTGAGGGGTTTAGCTGGCCAATTCGTATTTACTCGGCA	16.1089	14.5035	Evolution
DE_294306	CGGGGAATATCTTATAGAGTACAGGCACGGTGCTTTTATGTGCGAAGCCGACTATCAAAAATGATTTGGCCACGGAATTC	15.2339	14.5014	Evolution
DE_346738	AGGAAGTTGTCACCAAATAAGGTGCGCTCTTCATTTCGTTCAGAATGATAGGCTGTCTATTTTTTATAAGGTAGGCTTCT	16.1136	14.6516	Evolution
DE_317081	TTAGACAGTTGCAGTTATGAGTCACGTGGTGAGTATAAATATGTTACAGGGTACGGTGAGGGCACGGCCTAGCACTCGTC	15.0775	13.6097	Evolution
DE_313734	GCGGACTATTGTGAGATATAATCGTTTTATGCGGGTGCCGTGCGTCTTATCGGTGCTTGAGTCGACCGCATTCTGGTCTC	15.7975	14.6037	Evolution
DE_303145	CGGAGGGTCTATGGCCGCTTCTGAACGCACCCGGAATTAGTGAAAAAATCTCAAAATCACGGGATGCTCTCTCTCCTTGA	17.579	16.0133	Evolution
DE_305517	CCGCATGCTAAGAGCCGTTTGAAATTGTTAGTAAGTGGAGCCCCGTGTAACTCCCCCTGAATTGGATTTCTGGGATGCCG	15.5255	15.1505	Evolution
DE_320641	GCTATATGTACAGTGTTGCGGACCAATCACTGGTAGTCGCGTGATACGGTTGGCCGCCATGGGGTTTCTCCGCGTCTCAC	16.8187	14.5335	Evolution
DE_398423	TCGCGTTGTGATTTAATTGCTAATGATGGGCTTTCCGGGGAAGCGCTTGAATTAAAAATTTTTCAACCGCTACTTTGGAC	15.8921	13.8046	Evolution
DE_415833	TTAGTGAGGGGCACAATTCAAGGCGTCACGTGGGCCTGTCTGATTTGTGTGGCTGTCCCGGGTGTAAGAAACATTTTGGT	16.4692	13.5195	Evolution
DE_336161	TCATTCCGCGATCCGAACGTCCAACAACATTTCTTATTTAGTGACTTAGAGAAATTCTTTCCAGTGCGTCCACTGAGCGT	15.1564	13.4441	Evolution
DE_305768	CGATACCGGAGTATTAGATATTTTCATTACAGTATCGCCGTAGGGTAAGTCGAATTCGATTGGACTATATAAATAGTGAT	17.9625	16.5263	Evolution
DE_325798	CAAAGTGCCCGAATGTGTATGTCCGTCCCGGCTGCGTGGCTGTTAGAGAGCCACCCAAACATCCAAAGGTACTATGGCAT	16.6387	14.2409	Evolution
DE_305025	GGCCAGTATATCGCGGCAAGTTCACTTTGTCACCCTATCCGGTGGGGCCGGTCTGAGCAGTCCACATTTAGAGTTAGTGT	14.6487	13.9562	Evolution
DE_341166	TTTCGGCCAGAAACAAAGTGCCGTATAAAGGCACTCAACAGCAGTTTTGCACATGGGGTTAGCAGAAGACAGAGCGGAAG	16.6873	15.4739	Evolution
DE_291956	ACTCTGGAAGAATTTAGCCTCACTCGCCGTGTACATGTTTGGGTTTTAATTTGGAGCTTAGACAGCTATGTCCGTGTACC	16.1956	13.5542	Evolution
DE_296866	TCGGTGAATGACCGATCGGGGGTACTTGGGAAGACGCGAAAATTGCGAACGGGGTTGTTGATGTGACACCAATGCGTGAC	16.615	15.8507	Evolution
DE_379850	TTGGACTTTTTCTTGAGCTGTATACGTAGTATTACCAGGCTGAAGCGCGTACAGGGCGGACTGTATTTGGACGTACCGTA	15.4257	13.4839	Evolution
DE_315401	TCGCTTCGGTGTCAATGCTCTCTATATGAGATCCGGCTAAGTAGGCTCTCTAGGTTGCGGTGTTTCGTTTTCATGTCATT	15.1617	13.1662	Evolution
DE_289248	GCGTTGGAGTGCGATACGTCGCGCGAATACAGATTAATTTAATTGGTCGCATAGAACGACTCAGGTTGAGACTGCCCGTA	15.0585	14.249	Evolution
DE_400499	CTTTCATCGTGAAAAGTGGCTACGATCAATGTTTTAAGTTTTCTCTGCCGGCATTGCCGGGTAACAAGTCGAAGTTTTTT	17.7719	15.2086	Evolution
DE_312090	TGACGCATCCTGATTTCGCGCACTGCACTCGGTATATGGGTGTCCCAGGCATATTGTGTACACCCGATACTTTATCGGTT	15.1861	14.4405	Evolution
DE_365178	TGCGCTTTGTTATCGCTCCTCGAATAACCTGGCTTGGTATGTAATGTGTACCGCCCGAATGATGCCGAGATAACCCCTCT	14.5801	13.6935	Evolution
DE_416294	CTACTTAAATAACTTTTTTTCTTATACTAGTTTGTTTCAGCGGCTCCGAGTAATCCTTCTGTCTTTGAACGGTAAGGCCG	16.6798	15.1921	Evolution
DE_329862	TCAAGCGGACATAAGGGACCATGCCCGATTCGGAGTCGGGTAACCTGTTTACTTACCTGGGATCAACACAGATCCGATCT	17.7891	13.5958	Evolution
DE_315918	TTTACCCGGAAGTTTTCACACGGCACTACATTGATATCCATCCGGTATATGAAAGCTGGTTTCACTTAATACCATTGGAT	15.7322	13.3564	Evolution
DE_393829	GAAGTACTTTTATACTAGCGTATATAAGACCGAAATCGGTCAAAACGGGGATGTAACTGTAGATAAAGTCGCGTGCAACC	15.3499	14.5719	Evolution
DE_342953	TATTAGGGAGCAGGCCAGGTAACAGTGTAAATAGAGAAAGGGACGCGCGGGTCAGGCGAGAGGAAAATTGGTTTTTGTGT	14.5746	12.5654	Evolution
DE_361784	GCCGCGGTTTAACTTAGACCGAAGCGCGTAGCTTGAGTGTGAATGTGTCCGACGCTTTGGCAAGTCTACATAGTTACCTG	13.9916	12.7856	Evolution
DE_477878	GTAAGTCCGACGGGTTAAGTTATGTGGGATACACAGCTGTGGAGTTGCTATTGTGGTGATAGGGACAAATGTATGGGTGC	13.6905	13.3379	Evolution
DE_359485	GGCTTTAACTACGGTTACTTAGTGGAAAATGATAAGGGCTGCGGGCTACAAGCCCGCTTCGATATGATGGGACGACGAAA	14.9094	12.4755	Evolution
DE_314719	ACAGTTTGAGTATTTTTTGTGCCGTTGAAATCGGAAAGGTATGTGTTTCTTCATGTATCGGGCGGTATACGGGGGGTAAA	14.2024	13.198	Evolution
DE_311921	TTGGTTGTAGTTTCTTGTGCCGTTAAGATGTTTGATTACGGAATGGGAACAATTGTCACCCGGTGGTATGTCCAACTCCG	16.7798	14.7797	Evolution
DE_325945	CTTTATTGGTTGCTTGGGTGGTAAGAACGGGCATAGCGGCGTATATAAGGCGTTAAGTATCCTAACCTTGGCTGGCCTTG	15.0378	12.7271	Evolution
DE_440427	GATGTAATAACGCGTATCGGGTATGATCTCATTTCGTAGGAAGAATTTTTTCTGTTCAGCTCACAGGGGGAAGCTTCGGA	16.0761	15.6326	Evolution
DE_328047	TAGCGTGAATAGTGACAATCAATTCCAGCATTTCTCCTTGAGGCAGCTCGTCATACTATCGGGAGGCCGTGGTATTGGAA	15.7984	12.8521	Evolution
DE_348029	CTTGAATGTACGGGTGCTGATTGTATTTTTATGTGAAGCCGTCTCACACTCAGCGGCTAACGTTCGGTTTGTATATATAA	13.5902	12.4556	Evolution
DE_415549	CGTCGGATCGGAAGTTGATGGATGAATTTTTATAGCCAGGTAATACGGTTGGACCGATTTTCGCCCGTTAATTCCGGGTA	15.9968	14.4782	Evolution
DE_326672	TGATTCGTCTTGAGTGCTCTTGTCCTTGAGGGGTTTGTTCGCGAGAACCACGAAGTTCGCTGGCTGACCATCCGATTGTT	15.2412	14.9073	Evolution
DE_314218	TGTGTCCGACGCGTGACAACCAAGTACTTTAACCATGTAAGATGAGGAGCCTGAATTTTTTCATATCCAAACCCGGTGTT	15.7302	13.5291	Evolution
DE_332245	CAAAGGAGAAAAAAAAAATAACTGTGGATAAACGCGCGAGGGGTTGGCCACTGAGTGCGTTACCTGGACTAATGGTATCG	15.5986	13.7308	Evolution
DE_427934	TTTTTTTTCGCGCCATATAAATACTAAGAGCCTGGTAATCTATTATCATTGTACGTGCGCCTCTCGATTTCTTTGGTCAC	15.8244	14.6649	Evolution
DE_362299	TGATCACTTAGGACAGTAGGTTATTCGGGCATAGTGGTATCGCGTTCCCATATATAAATAGCACAGTATTACGAGGCTCG	14.377	13.6374	Evolution
DE_371989	TATGGATGTGTAAGGCGCTCAAGTTACATCAATTTAGTGTTACCCGGCTCGGGGCACTCCACGGCTGTGAGCATAGGTAG	18.6329	15.9206	Evolution
DE_295949	GGCTATCGTGACCAAATCTGAGGGTGACGCTTTGGGGGCAAGGCCCTGCTCAGGGGGGTGGTCTCAAGACAGTCTGGTCA	13.6893	13.2818	Evolution
DE_287493	GTCTATAAGTCCGGGAAACAGATGGTACATTCGCGCGTGGGAGTTTTGAAGCAACTTTTTCGGGTTGAGTGCTCTTCCTT	16.3335	14.4314	Evolution
DE_384408	TCGGGTCTGAGGTTCGCGTCGCTTCTACCTTAATATTTGTCCGACTGCAGTGGTTGATGATAACAGGGGGTGTTCCGAGT	14.0546	14.2426	Evolution
DE_326458	TTGGCTCCTTATGTAAATTCGTTGGTACCTGATGACACATCGTGCGGGACGAAAGTAAGTATGGCTCCGGTTTTGTGCGT	15.8196	13.9606	Evolution
DE_465770	ACTATATGCGGCTCAGTTTTTCGATTTGAGGGGAGTGGTCGACTGTCTCAGGAGCCCCGTTGTTTCACGTTCAGCCAGCA	13.3892	13.5185	Evolution
DE_316796	TTGATTTGAAAATTTCTTAAGGGTTACCATACAGGGATTTTTGTATTTTGCACGCGTCCTCTTTCAATCGTGCGTCCTTC	15.6184	14.352	Evolution
DE_410310	TAGTGCGGCCATGGGGTCCGCTTAGAGTAATGTCTGTGTGTTTAGATCAAGGGGCATGTCGTTCCGTCTGACACAGTTTC	13.8844	14.5511	Evolution
DE_306641	CTAAACTGGTGTTGCGAGATGTCTGTGTGTTCAGTTTATATTAAGCAGATGTGTGGTGTTTGGGTGGTCGTTATTCCGGA	15.1423	13.8093	Evolution
DE_309016	ATAGCTATTGAAATCGCGCGTGCGGTAATCCAGGTAAGCAGAGCTGTGCTGGACGGACAAATGGTGATTCCTCCGGGTTA	15.4303	14.1404	Evolution
DE_302245	GACGCGGGTAACAGTAGGGATTTTTTTGGAGGCCGTGGTTCCTACATGTTGTGACCAGGTAACTTAGTAGGCGTGTGCGA	15.9632	13.066	Evolution
DE_301856	TCCGAGTAAGTCCATTATATCAACACTGTTAAACCCCTTTTTCGAAGTGGTGTACCGTTGTACGGTAGAATACGCACGGA	15.3582	14.701	Evolution
DE_283279	TGTTTCCGGGTAGTAATGCCAGCAGGGCTACAGAGTGATGGTTGGATTAGCCATCCGGGTAAGTTGCCACGTGATCACAA	17.3762	16.1259	Evolution
DE_360426	TCGGCAACGATGGTTACCAGGTGTCCGCCTTCTGGAAGTAGCTTAATTTTTATAGCAAAACGGTGATCCAAATCTATCCG	15.9809	13.9433	Evolution
DE_318152	ATTGAGTAAGTAAATTGTGTTTGTCCGTGTATACCTATATAAAAGGATGTTCGCTCGTGAACAACTTGTACCGGCAATTT	14.7587	14.6563	Evolution
DE_414510	ACGTTAGAAGGTCGAACATCTTTGGCTAGACAGTTTTGCCCCTGAGACTCTTATGTGTCGTCGATAGTGACCGACTGGGA	16.3374	15.648	Evolution
DE_308817	CTAATACAACGCGGCAAGTTTTTCCGATCAACTGAAGACAACCTGGCGTGCGTGAAAGGTTGGTTTTCTCACCGGCCGAA	16.3157	13.6225	Evolution
DE_308243	GGTCCCATTAGGGTCGTCGCTTTAACGAAGCTGTAGCCGAAAAAGGAGTGAGGGTGTCATGGCGAGGAGACGACTCGGGA	16.6378	16.6147	Evolution
DE_296312	TCTAGTTTCGTTCGTAGTGATCTAAGGATTAGGATCGTGTTACCAGGGTCCTGTAACTGGGCGCTTTTTCCCTTGAGTTA	16.5057	13.6135	Evolution
DE_325497	TCCCTCGTAAAGGGTTACACGGCTGTGGGAGAGGGGGCTTTCTGAATTGACTCTCAGTATTTACCGGGTAACTGGCATGA	16.5724	15.5715	Evolution
DE_385737	ACGCGTTGTTAGGTTAGTAGAAACGGACATTGGTATGCTTCAAATTCGGTGCTAGTGCGCCGTGGTGTGTGGAGGTAGAC	16.7201	14.1956	Evolution
DE_285764	AGTCCGCGATCATAAACAAACGCGCGAAGAAAAAACGTGGATATAACCGATTGTCGCGCGAGGTATGGCTTTCCCATGTT	17.073	15.2362	Evolution
DE_316512	CAGATAGGTGCCATCAGACGTGACATCCGCCGGGTAAGTGTATGGCCTCTGGTGACTGGCCAATACTCGGGTTGGCATTG	16.6711	13.8791	Evolution
DE_328566	GGACTGTGCACTAGTAAAGGTACAAAAAGATATGAGATTTGTAATCTTACACGAGGCACGGCGAAGGACCTCTGTGGAGA	16.6705	13.5252	Evolution
DE_286773	TATCACTCTTCAAGGAAGATATCGTAAAAAAGCTACGCCAGTGCGGGTAATGTCCACCAGTGTCGATTGCGGCTTGTGCG	16.9319	14.1629	Evolution
DE_311564	ACATGAAGAGACGCTCGTGACCGAGTGTTCTTATCGAAAAAACGGGTGTTAATTTGTCCGACAATTTCACAATCTGAAGT	16.7893	14.45	Evolution
DE_319115	ATGTAAGGTTTACCTGGATTTATTAACTTATATGAGAACATCCAGACATCCCACATACCGGGTAATCCTTACTATTTATG	16.4477	14.9234	Evolution
DE_313470	TGGTTAAACTGGTCATTCCACAAGAGTATGGCATGTTACCCGGAGCATACCTGGAACCGTGTTTGAGTAATTTGCTCTTA	17.0976	14.3652	Evolution
DE_295149	AGATCTTGTTGAGACGCGACGTCTCGTCCGAGGGGGCGGAGTTGTTGATCGAGAAGTACGGACACATTGATGATCCTCCG	16.8146	14.7294	Evolution
DE_299215	TTAGTATCGTTTTTAACGGTCAAGTAGGTCTATCCCTGGTCCGTCTTGAGTGATCAGATGAACGTTACCAGGCTTAATAA	16.472	15.2661	Evolution
DE_295705	CACAAGACACACCGAGCGCGGCCCGAATTTGCGACATTCTAGATTGCGCGCCCGTCTCAATGGGTGGCGGTCTAGAGTAA	17.1943	14.781	Evolution
DE_298443	ACGCGATATAGGCAATGGGTGTACGTTGACCGAGTCAACGATCCGGGGAAGACGCAAGGGGGGTGGAAGCCATGGAGCGT	15.5223	16.418	Evolution
DE_323025	CGTATGTCGCCGATGGAGTGTCTCCGCTTCGTTAATTTGGTCATAGGCGCTTAGGGTTAGCCGCCAAAGTCATTTAGTAC	16.6696	15.3795	Evolution
DE_283935	TGCGTGTCCATACATGACGACTACATAGGAGGACCGCGCCGTGTCGTATCGTATATAAGTGGCGGGTAATACGAGCATGC	17.3098	15.5687	Evolution
DE_298900	AGCCAGAGTTCAGTCTCGCGACCTAAGTGCGGGTAATCCACCTTACAAGATGACTTGGGGGTAGCTTCGACTTCGGGCTA	17.1417	14.9941	Evolution
DE_323973	GCGAAGGTATAAATTAACGCGCGTGGTACGCTTCGAAGTGCGACCTAGTTGAACCGAGGAATAAGTTTTTTGTCACTGGA	17.3953	14.8622	Evolution
DE_324657	TGCTGTACTAGTGGCGGCGCGTATACGGATAGCTATCGAGTGTTGTATTACCTGGAAGCTTCCGGGTAAGCTTCGTGCCG	17.5641	14.8878	Evolution
DE_297501	GGTTTTGAAGGCCGGACATGTGGTGCGGGCAGAAGTGGTCATGTTATAGGAATGGCACGGGGGCGAAAAGAAAAGCCATT	17.218	15.4713	Evolution
DE_289363	AATTGGCCTAGTTGAAGATGATGTGTCGAACCGGGTAAGGCCCATTAGGTGTGACTGACGCCGGGTAGCGAGTGTGTTGA	17.3926	15.5111	Evolution
DE_287381	TCGGACACGATTCTTAACCTTTTGGAATCGGGGGTACGGGTGGATCGTAGGTTACCTTACGGCATGGACTCTCAAGGGCG	17.1771	15.912	Evolution
DE_284169	ACTGGATACTGATTAAGTGTTCAAGCGGACAGGGGTAAGAATTAATAGCGTTACCCGGACACAGCCGACTGGGGCAGTCA	17.2079	16.1084	Evolution
DE_294594	ATCCGATGCCATATATATTACCAGGTAGGGAGATGCTTGGGTTGTTCGAATCTCATTCGGGTAACCACGTCATCAAAGAC	17.9133	15.8481	Evolution
DE_283779	CGCATAAATGAGGTGGGCTTTGGCTCACCGGGTAATTGTATTAAATGATTATGGGGAGGCCCGTAGACAAAATTTTTCTA	18.0061	16.19	Evolution
DE_327739	CCGGAGGTCTGGGTGTATCCAGGCGGGTAAGTATGGCATTGGGGAACGCAAAAGTTCGATTGAAATGACTTGGATAATTG	18.6508	16.2652	Evolution
DE_474239	AAGAAGCTCACGATTGCTTAGCATATCCACCAGCATCCGTGACTAGTATCAGAGACCTATATGCTGCATGATGGGGATGT	5.0725	3.51973	Evolution
LE_4043	GTTTTATGTCGTTGGAAATCTCTTCGCGTCTTTCGATTTCTGCCAGTAAAAACCCTAATAAGCGGGGCGGGGAGGTCGTC	15.4453	13.9627	Ledidi
LE_6672	TTTTTTTTTCATATATATTTTATATATAAATATTCTTGTAATTTTTATAGTATATAAATAAAACGAAAATTTGTAGATTA	14.728385925292969	15.59266471862793	Ledidi
LE_5438	CGTCATTTCTTTTTTTTCTGCGCGGCAGCTTTTTCGGCTCGCCTTCGTAGATCGTAGTGTTCTGTACGAAAGTGGTCAGA	16.5429	13.5443	Ledidi
LE_888	CCGGAGGGATGAGTGGGCGTTCGAAGCGAAACGGGCGACGAGAATTATGTGCGGGGTTAACTAGAGTGCGCCGGGGAATG	15.6881	15.252	Ledidi
LE_4364	TCTCTTAGGCGTCACTTCTCTTTTTATGAGTTCTGCGGAAGTCGGCTCTCGCGTTTTCGGTGTTTTTTTTTGATGTTATT	14.7034	12.4591	Ledidi
LE_4900	TATTTTCTGCGTCGTTCGATTTTGAGTTTTTCCCGATTTGGGTTGGCAGCCAATCGAGGCGTTTTTTTCGTGCGGCTGGA	13.5942	13.1126	Ledidi
LE_4581	TTGTATAGTTTTGTAGAATTCGGATTTTCTACATTGTTTTTTTTTCCTTGTACGTTCTTGTTTCTTTCCCACAATAACTG	14.6648	13.559	Ledidi
LE_996	CCTTGTATTCTTGCCGGTAGTCAACTTGTACTTTGTTCTGGGCCTATGCCGAAGCTTCCTGCCCGCGTGAGGCGCGTGGA	15.1614	13.6407	Ledidi
LE_5463	AGGTGATTCTGTTGTTGTTTTATCTCTGCCTGCGTGTGGTTTACGATTCGGGCCGCGGACATGTGCGCGAGACCGGTCTA	14.6469	12.6319	Ledidi
LE_1217	GTACATGTAATTCTAGTAATCTGCGTACATAAATATTTATTTCGTAAAATTTTACTTGTAATTTATTTACGGGCGGTGTA	13.7206	13.3775	Ledidi
LE_5014	GTTTCTTTACGTGTTTCGGTGCGAGGGGCACAGGGATGAAGTTGCGTCGGGGGATAGACTCCGGGGGCGTTCCGACGTTG	15.2135	14.5193	Ledidi
LE_1460	TTTCGTGCAGAGACGACGTGCCCTAAATAGGCAACTCGCGGCGGTGTCTCACACGGGGGTAGGAGAAGACAGAGCAGTCG	15.0655	14.9806	Ledidi
LE_5544	TGTTTGGTTCACGGAGCTCGTTAGCTCTGGCCTTCCTTTACTGTCATCGGCCCAGACGAGGCTCCGCGTCCCTTGCGTGG	13.7694	12.4303	Ledidi
LE_4970	GGATGTATTATTTAGCCGTATTTTACGTATTTTTAATTTATGTCGCTGGCTTTGTCGGGCGAAAGCGTGTAGGCGGGCGC	15.6242	13.3809	Ledidi
LE_5962	GGAAAAAACGAAAAGCCGAGAATTTTCTGCTTTAAGCACAGCCCGAAGCAAAACAAGCAGTTGGTCACACGGAAATATAG	16.7051	14.7518	Ledidi
LE_6400	TTGAGTTCTTATTTAATTATTAAAAATTTTCTTTAATGTTTATCTCTTGTTTTAAAACTTTTATATTTTCTATTTTGGCG	15.748154640197754	13.860745429992676	Ledidi
LE_6377	GATACTGAAAATGATTGGGTGTTACTTCTAATTACATGTCACATGGGTCTCCACTTCGTTGGTCAAACGTGTAGTCTGGG	15.69863986968994	12.583816528320312	Ledidi
LE_2589	GGCGGGGGTAGCCGCAGGGCTTTTTTTCCCGGCCGTGGTTCCTACGTGTTGTGTCTGCATGACATGGCAGGCGGGCGCGA	16.0993	14.5432	Ledidi
LE_1589	TTTTTCTTAGTAATCCTTTTTCTTTCAACTCGTTTTAATTTTGTGTTGCTTGTATCTGGCCGCTCCGTATTTACTCCGTA	15.5805	13.0591	Ledidi
LE_2468	TCGTCTTGTCCTCCTATGTAATTTTTTTACTTAGTGTAGCTTTGAGTCGGCTTTTGCAGATTGGCCGCTTTGTCGTGTTA	15.7406	13.9043	Ledidi
LE_623	TTGGACTGTCTTGTCCGATTCCGTCATTCTCTTTCGTAGTTTTTTAAAGCACAGCGTGTAGTTTTTTGTCAAAGTTTCGC	15.6254	14.4965	Ledidi
LE_27	GGTTTCCGGAAAGTAATCGCAGCAGAGTTTCCGAGTGAGAGTTAGAATCGCGATTTAGGAAAGTTTTCACTTGATCACAA	13.7093	12.9977	Ledidi
LE_4021	TACGTGATTTTTTCGTAGTTATATATATTCTTCTTAACTTGCCATCTTTTTTTTTTAACGAATACCCGCTGGCGCGACCA	16.7704	14.7726	Ledidi
LE_6651	TTTACTTGGAAGTTTACATATATCTTTACATTGATATCCATTTTTTATATTATATCTTGTTTTTCTTACTACCTTTGGCG	14.895094871520996	13.47231388092041	Ledidi
LE_353	CTCTGTTTCGGTCCCTAAAACTACAAGGTGCCGTGTCCACTTTTATCACCGTCCGCGCGCCGCTCGGCGTCTTTTGAAAC	16.8368	15.5458	Ledidi
LE_2847	TCCTTCCAGATATTTTTTTGCGGACATATGTCGCTCCGTATGACGGTTGTTGTTCATTGAGTCAACTTTGGGCCCCGCGG	14.3781	13.6569	Ledidi
LE_3982	CGCCCGATGGAACTGTGAAAGCGCAAATTTTCGAGCTTGCTGTACTGAGTAATATATACCGCCGTTTGACACCGCCAGGA	15.5122	14.1043	Ledidi
LE_1759	TTTAGTTAAATTCGTAGTGAGCTATATTTTACGTTCGTGTTATCCGAGCCTCGTGACCGCGCGCTTATTCTCTTGCGTTA	15.3509	13.9685	Ledidi
LE_703	TGTGCATGGCTAGTTTCAGGCGGTAGGCACTTTCACGTGTTTTTGCCATGTCGGGTTTTTCAGGTTTTGCACCCCACTGG	15.1402	13.863	Ledidi
LE_3157	GAATTTCAGTGAAATTTTCTTCCCGCATTTTACCATTCAAGAATTTAGGTCTGGCCGCACCGTAACTGTAGGTGCGCAGT	14.5995	12.3603	Ledidi
LE_2187	GTAGATCTGTACTACCAGCGGATCTGAAACCATAACCGGGCAAAGCGGGGTTGTAAATTTAAAGAAACCCGCCTGCGGCC	15.2817	13.6506	Ledidi
LE_2547	TCCGGATTTGTCCCTTATTTGCACGCTGTTGAGCCCCTTTTTCGAAGTGGTGGACCGTAGCTCGGTAGAACTCGCACCGA	15.5845	15.6254	Ledidi
LE_6456	TTATATCTTGTAGTTTTTATAGTATATCTTAGTATTATTTTCTTGTGTATATTTTTCTATTTCTCTACGGCCCGGGGCTA	14.209589958190918	13.115873336791992	Ledidi
LE_745	TCATACTTTATTTAGTCTCTTAATGTAATCTTTTATATCGTAGTAAACGGTATTCGTGTATAAGCGGCAGTAACGCGGTG	14.5902	13.3683	Ledidi
LE_6521	ATGGTTCGGGTTTGCTATGGTGTTAAGATGTTTGGTTACTGAACGCGAACAATTGTTCCCCTGTCGTAAGTCCAACTCGA	14.433182716369627	13.01247787475586	Ledidi
LE_3246	GCCAAGCACAACTTTTTTCACGGGTAAACCAGGCCGCGGGTTCAGTGCCGCGTCGTAGGGAATGTCCGATGCGGCCGCGC	16.2067	15.379	Ledidi
LE_2149	TTTGTATTGTCTTGAACGGCCGAGTAGATTTGCCCCTGCCCCGTCTTGAGTGTTCACGAGAAAATTGCGCGGCATAAAAA	16.0182	15.5866	Ledidi
LE_692	CCACGTCTTCCTGAGTGACAATATGTCCGGCCTGCCATCAGGCATAATTTATTGGACGCGGGTGGGTGCGCGTGCGGAGG	15.1186	13.0188	Ledidi
LE_4491	CCGGGAGGTGCGGTCTGATTTTACATCCGGCGCTCAAGTGTCTGGCCTCTGGCGACTGGCCAACCCTCAGGTTGGCCTCG	15.9986	14.7079	Ledidi
LE_2451	ATGTGATTTTCTCCTTTCTTAGTCTTGTATTACGTAGGCTGCCCGTGAAATAAAATTTTTTCCGATTTTTCGGTCTTAAA	16.6865	15.4823	Ledidi
LE_3599	GCCAGAAAATGTGCAGTTCTGATGAGTCGGTTTCTTCCAGCGCCTCGTTCGCGGTCGACTGGGCGCCGGCGCTGCACGAG	15.1674	13.349	Ledidi
LE_2991	GTGGAAGGCGCTGCGGGGTGAAATCTCTGTGTGAGGAAAATTTCTCAGGTCATGCTGAGTCACCAGTGCGTTTCCCCGCA	15.6044	14.4088	Ledidi
LE_5125	TTAGTGTAGTTTTTGTATCGTCGTTCTAATATACGCTACGCGTGATCTTATCGGCCCGAGTCGCCGACTTGACCGGCGCA	15.7517	14.0838	Ledidi
LE_5634	TCGTTTTTTCGTAAAATCTTGTCCCACATGATGTAAATCTTCTCGTACTTTTTTTTACAAATATAAAATTCTTGTTGACT	16.8053	14.5278	Ledidi
LE_5299	TCTTTCGGCGTTATGTACCCCGCGTGGCGTATTTGCGGGCTTGTTTCTTTTGGGGCTGAGTCAACCGCGCGTGTTCTCGA	17.0605	15.8068	Ledidi
LE_6553	AGCTATAACTACCTTTACTAGCTGGAGCCGGGTAACGGCTGCTGGCTACAATCCTGGTTTCTTATGGAGGGAAGACGAAA	16.573131561279297	13.7685	Ledidi
LE_4519	TTGGTTTCTTATTTTCTTAAGGGTTAACGTGCAGGAGTTTTTCTATTTTTCACGCGCCCTCTTTCACCCGGGTGTCACGC	16.9216	14.653	Ledidi
LE_2516	TTCTCTTATTTCAGGCCGCTACCTTGTTGAATTTTTTTTACGTATATATCTGGGGGTATTCTCGGACCCAGCGCACGTCT	14.9618	14.7615	Ledidi
LE_6197	GACGTGAGGCAGGGTTTTAAATTTTCCGACATTCTCGCAAAAGGACGAATTTCTTCATTTCTTCGTTACACCGCCGGGGT	16.2131	13.9187	Ledidi
LE_6729	ATTGTTATAAAGTACTTTTTTTTCTTGTTACGTTCTTATTAAGTTTTTCTTATCTTGTTGCGGTCTTGTCTTGTGCCTGG	14.557372093200684	13.72678565979004	Ledidi
LE_1398	TTTCGAGGCCAATCAAAAATTAGGGTTTCGGAGTTCCGGGATCGGCGAAAACTCAGAGTTGGCGGGAGAGAGTGGCGACA	15.4673	13.375	Ledidi
LE_1741	GTCTCGCGCGCGCAAATCGGAGAGGGACGCTTTGGGGGCAAGGCCCTGCTCAGGTGCGTGGTCGAGAAACAGCGAGGTCC	18.641	15.9586	Ledidi
LE_2008	TGACTGTTTTAGCCGGAGGGGTGTAGTTTTCTTGGCGGAGCACGGGTTGCCGATAGCGACCGCGCGGCGCAGGCCGGGCC	16.1165	14.5991	Ledidi
LE_1250	TGATATTGCGTCATTTTCCTATAAATCTCTCCGAATTTTGCTTGTTAATTTTCTCTGCCGTTACCGGCTTTGTTCCGGGG	14.576	14.6961	Ledidi
LE_659	TATAGGTCTTGCCATATACTGCGCCTGTCTGGTAAGGCGTGTGCGTGGGGAGGTGCAGCGGTGGGTGCAGGAGAAATCCG	15.4651	13.6174	Ledidi
LE_1307	TGGTTTATATATTTAGGCGAAAAAAGCGAAGTATTTAAGTACCTGAAATTTTATCATTCTTGCTTGAATGTAAATATCGC	16.2615	14.7941	Ledidi
LE_238	CAAAGGAGGATAAAGAAATAGCTGCGGATAAACGCGCGGGGGGCTGGCCGCCGAGTGCGTGACCTGGGCAACTGGGGCCG	16.944	15.3742	Ledidi
LE_5382	AGCGCGTGCGGCACATTTTTTCGATTTGAGAGGAGTGGTCGCCTCTCTGTGGAGCCCAGTTGGATCACGAACAGACAGGA	17.2552	13.6295	Ledidi
LE_5507	TTTTAAGGGCATGCGGAATTTCCCATATTATCGAAAAAGGGGTATTTCGCACCCCTCGTCCTCCGCGCCGCTCTCCGGGT	15.0006	14.9939	Ledidi
LE_3177	CTTATCTCGTTTTTCTGCGTGTCTGGGTGTACGGTTTATATTTAGCAGATGTTTCCGGTTTTTCCGGCCGGGCTTCCGGA	18.1395	16.6468	Ledidi
LE_5104	TTCGTGCGGCTCACACTTCAGGGCGCCGCGGTGGCCGGTCTGATTCGTGTGGCCGTCCCGGGTTTGGAACACGTTTTGGG	16.4719	14.9016	Ledidi
LE_3294	GGGCTTTGCACAGGAATATTTCCGCGTCGGGAAATAGGACGCGGTGGAGGGATCGCGCTGCCGCCGCAATGTTCAATTTG	17.2202	15.2024	Ledidi
LE_3027	CCGCTGGCTAGGAGCCGTTTGAAATTGTCCGTAAGGGGGGCCCCAGGCGCCTCCCCCTGAGGCCATTTTCTGGAAGGGCA	16.9414	16.638	Ledidi
LE_1039	GCCTCCATGTGGCCTTTTGTCGAGTATTTCTCTGATGTGACTTTTATTTTTGGCGGGCCCGCTCGGCGAGCCCTGTCAGA	15.2753	13.2063	Ledidi
LE_4103	TGGTTAAACTGGGTAACCTAAATCTGTATGGTATGGTACCTCTAGCATACCTGGAACCATGTTTGAGTGATTTGCTCTTA	14.557	12.7564	Ledidi
LE_2384	CTTGCATGTACGGCTTCTGATTCGATTTTTTCTTGAAGCCTTCTCACACACAGCGGCTAAGGTTCGGATTGCATATATAA	13.9947	12.945	Ledidi
LE_2250	ATTTCAGGAAAAAACGCAATTTGTACCTCCGAAGGCGGATGGGGGTGCACCGTCCAACAGAGCTGTGGGAGTTTGTGCGC	14.4025	13.1557	Ledidi
LE_3809	CGCGCATAACCTAGCTCGCGCTTTGTACACTTCCTTTATATTAACTACGCCCTCGTAACGCTTCGTAGTTTTTTTGCATA	15.2863	12.9604	Ledidi
LE_3440	GTAACTTAGCGCATCTTGTTTTTTGTAGGTTTTACAAATTTCTTCAGGCGTATCTACCTGGGAGTGCCCTCTCGGGCCAA	15.7571	13.4	Ledidi
LE_4451	GATCGGGACTCGCGAATAGTTTATGGAGTCTTGCTTCCTCCTTTTTTACGGCGGGACGGCGAGACCGTGGGCGATATTCA	16.0949	13.8971	Ledidi
LE_4177	TGACGTGTGAGAATAATTTCGGGTGTTGAATTCGTTCTAGGCTTTTCGTGTCCTCCCTAAAATGTATGGGTTTTTATGGG	16.6115	15.5991	Ledidi
LE_5079	CGGCGGCTTCGAAGTTGCTGGGCGATATCTTACAGCCCGGTGTTACGGCTGGACCGATTTTCGCGAGCGACGTCCGGGTA	17.8016	15.1572	Ledidi
LE_6121	GACCTGTGCACTCGAAAAGGTCGAAAAAGATATGCGATTCGAAATTTTCCACGAGGCTCGGCGCAGGGGCTCTGAGGAGA	15.2384	13.6679	Ledidi
LE_6844	AAGTAGGGTAACATTGAGTAGCAAATCAACCAGCCTCTCTGACTACTCCCCGTGAATTCTACGCTCTCTTGTTTGTTTGT	17.111568450927734	14.581318855285645	Ledidi
LE_151	ACTGGCTCCGGATTAGGTGTTCCAGGGGGCATGGGAGAAATTTATTGGCGAGACCCGCACCCCGCCGGCCGGGGCGGTCA	16.7091	15.9678	Ledidi
LE_2282	TCGTTCAGTTATTTCTTGCATGGGTGTGTCTGTTTTATGTGAGGGGCGCTGTGTAGGCGTGCCAATTTTTTCTCCGGCCT	15.5742	13.6262	Ledidi
LE_3086	CTTTCATCGTGCAAAGTCAGTGCGAACCCTTGTTTAAGTCTTCCCTCCCGGCGTTTTGAGACTAAAAACCGAAGTTTGTC	13.9419	13.1671	Ledidi
LE_4804	GCCATCCTAAGGATATAAATACATCGTAGGGCGCGGCCGCGAAAGGGTCGGTGGGCAAGGCGGCGGGAACAAAGTACAGA	16.155	13.8357	Ledidi
LE_2669	CCTTCCTTAAATAAAATTTACCAGTTTAAGGGGGTGCACTATATTTAGGGCTTTTGCATCTGGGGGTATAAAAGGTACGA	13.8295	14.4798	Ledidi
LE_4842	GTGTAAATTTTACTTGTATTTATTATCTTATATGAGGTCACCCCGAAATCGCACAGTCCGGATTCTCCTTGCTATTTATG	14.5138	13.9588	Ledidi
LE_4552	TTGGGCAGTTCCAGTTATGCGTAGCGTTCTGCGTATATATATTTCAGGGGGCATGGGGGGGGCTCGGCCCCGCACCCGCG	14.0521	13.9012	Ledidi
LE_6257	GCGATTGTTGTGTCATTTACTAAATCAGTGCCGTTTTGTTTTCGTTTTTCGCATTTCGTAACCGATCTTTCTGCTTGCGC	13.8099	13.0286	Ledidi
LE_3534	CTTCCGGGTTCCAGATTTAGTCTTTTCGTAACTTAAAAATGAGAGAGCAAAAAAATTTTAAACCGACCGCGCCCTAGTGA	17.252	14.5859	Ledidi
LE_1209	CCGCTGGCCCATTTTAGCCGCGCTCGCCGCGTCCAGATTTGTCTTGTAATTTGGCGCTGGGCCAGCGTTGTCTGTGCTCC	16.2639	13.7287	Ledidi
LE_279	GCGTTCCTTGCGTGGTCCCCCCTCGTTTCGTATAGGAAGTCCTTGTTGTTCAGAATGTCGGGGCGACGGAAGCGGTAGTC	15.608	14.2604	Ledidi
LE_2936	TGGACGGATCTGCGGGGCTCACGGTGTCAATTGTTGTCCGGGGTGGGGTGTTGGGTCTCTGGGGGGTAAAAATGACGCAG	14.6065	14.8977	Ledidi
LE_2691	TGGCGGGTGCATGGCCACTTCTGCACGCGCCCGGAATTCCAAAATAAATCTGAAAATTACGTGATGCTCTCACGCCTTGA	14.7708	12.9055	Ledidi
LE_5615	TGTGGATGTGCAAGGGGCGCACGTTACACAAATTTAGTGCCCCTCTGTTTGGGGCACAGCACGGCGGTGAGCAAACGTCG	14.1655	13.8585	Ledidi
LE_2887	GAGGTTCTTTTTACTGCCGTGAGGGACACGTGGTGTCGAGGGGTTCTTTTTTTTGGCATGTTTGGGCCTGCTAGCCCGGC	14.4735	13.2979	Ledidi
LE_344	AGTCCACGATCATAAACAAACGCGCGAAGACTAAACGGGGACTTCACCGATTTTCGAGCGGGCCGTGGGTTCGCCCTGTT	17.5892	15.6389	Ledidi
LE_5848	TTGACCCCGTTTCGGAATTCGCCCGATCCTGATGACGCATCGGGCGGGAGGAAAGTTAGACCGGCCCCCGTTTTCTGGGA	16.6811	16.5791	Ledidi
LE_5818	TTAACTTGGTCAGTTTGAACGAGATGAATTCCGGACGTTTGAATTTTTTTTGCCCCCCGTGGGTCACATGTTCTTGAACC	18.4762	15.6324	Ledidi
LE_1154	TCCCTCTCCTTGTTTCAGGGTGATTTTTATTAGGTGCCCGGTCCGGCGCTTGATTTTGTTTTGTATTCTAGAGGGCCGCG	15.9052	14.7175	Ledidi
LE_5735	CGCAGCGCCGCAATGTGTATGCCCGGCCCGTCTGCGTGACTGTTCGAGAGACACCCAAACAAGCAAAAATACTCTGGCGT	16.9224	14.3817	Ledidi
LE_3729	TCTTTCTCGCCGTCGTTCGAGCGCCGGTGGGCGGCGTGCCTGGACAGGAGTTCACGGCCTCCGGCCGCAACGCCTTAAAA	16.6778	15.623	Ledidi
LE_1110	AAGGGTTGTTCGGTTCGTAGTAACGGACGGGGGTGCGCTTCAAAATAGGTGCGCGCGCGCCGGAGTGTTTGGAGGTAAGG	15.2573	15.032	Ledidi
LE_1654	TCACTCCACCGCTTGCCCAATTTACCAGGCTAGCCCTCCGTTTCCGGCCGAGGTAGGGCCACGGGTTTTCAGCGCAGGTC	16.0482	14.0399	Ledidi
LE_2098	CCGTGCGCCAGTATATATTTTGCGAAAAGGCACTGGTGTTTACCAGGGGGCGTACGAGTGTGGGGAAAAAAGCCCTCACC	15.2507	16.0173	Ledidi
LE_5042	GCGCAATGCTCCGTGTCGGGGCCCAGTCACTGGGAGTCGAGTGAAACATTTGCCTGGCATCGGGTTTCTCTGCGCCTCAC	16.8481	13.7863	Ledidi
LE_5718	TCCCCCGGACAGGGCCAGCCGTCGGTGGGGGACGGGGCTTTCTGACTTGACCCTCACATTTTACCGGAGAACTGGCCTGA	16.0146	15.1748	Ledidi
LE_2746	CCATTTGAAGTTCGTCTGGTACGTGTCCTTCCGGAAGGCGAGGGCGCCGGAGGGCGAGCGCGGTGTGGGCAGCCAACCCA	16.136	13.6082	Ledidi
LE_5665	TTTTTCGCGACAGTCCCTTTTTGGTGACGTCTTTCTCCTGCCGGCTCTCTCTTGGGTGCGTCTCGCTTTGACATCACAGA	15.3442	14.1165	Ledidi
LE_46	TCGTTGTGAACTAAATTTCCTCTTAAAATTTTGTAGGCGTTACTTAGGCGTCAGCCTAGGGTGGGCGGGCCCGCGCTGTC	15.0304	12.8569	Ledidi
LE_288	TAGGACTTTTTATTAAGCTTTGTACGTAGTATTCCTCGAGTGACGCGCTGTCCGGGCGGGCTGTATTTCGAGGTGCCGTA	14.4103	13.3606	Ledidi
LE_2070	ACGCTATATAGGCTATGGGTTTATGTTGGCCCTGCCAACGTTTCCGGGCAGGCGCGACGGGGGTGAAAACCAGGGAGCGT	17.2929	13.7718	Ledidi
LE_3351	ATCCCTGCAGTAGGGGCGTGTTGTGCGTGGGCCACGTGAGCGGAGCGCGCCCTGGCACGTGGGCAGTGAAGTCGCCTGGA	17.5166	13.9065	Ledidi
LE_3675	CCGCTGTGTATAAGGGTTTTGACACTTATGCGTTGATACGGCGGGCGTGCAGCGGAAATTTGCGTCCCGTGCCTTTGGTA	15.2937	12.8331	Ledidi
LE_5897	CGTAGAGCCGGTACGTAATCTGGCCGAGTCGCTTCTTGATAAATCGGCATGACGAGGCTGTTCGGGGCTTGCGCGGGCGC	16.1419	15.0539	Ledidi
LE_5179	CTCCGTAAAATGTTTTTCTTCTGACCCGTTTTTTTTTCTCCGGCGTTGCGCCTACGTTCTGTTTTTGAACGGCAAAGTCA	17.8394	15.6749	Ledidi
LE_1479	TTTCGTTCGTCGTGTTTAGGGGAAGTCGGGGATTTGGACCAAGAGTTTGTGAGGTTACCGGCGCGGTTTCAGCCCAGGTG	13.6711	13.4911	Ledidi
LE_5323	CACTCATGAATTTTAAAGCGCATGCAGTTTGCGCACCGATCGCTCAAAGCACATTCTCTTCACGGGGCCTAGCGCGCGCA	15.77	13.8172	Ledidi
LE_547	GCGAACACGATTCTTCACTTTTTGGACTCGAGGGTTCGGGTCGACCGTAGCTGACCCTACGGCGTGAATTCCCCACGGCA	15.406	14.6443	Ledidi
LE_1709	AATTAGGGAGCATGGGGGGTGGCTGTGTAAAAACAGAAAGGCACGAGCAGGTCACGCGAGCGGAGAATTTGTTTCGTTGT	15.5019	14.1268	Ledidi
LE_5772	CTTTTTTGGCTTCTTGATTCGTAGGATCTTTCTTAGTATCGTATATAAGTATTTTTATAATCTCACCTTGCCTCGCCTTG	16.041	14.5747	Ledidi
LE_3494	TTAGCGACTGAAATCGGGCGAGCGGCCCTCTGGGCAAGCAGGGCGGTGCTGGAAGGACCCAAGGACTTTCCTTCGGGTAA	15.6712	13.5431	Ledidi
LE_4650	GCCGGTGCGTCGTCTGCTACAGAGGGACCGCCTGCGGAGTCAAATTCTCGCGCGGACAAATCCCGAAATTATCTTTTTCG	17.4316	16.031	Ledidi
LE_6030	AGGGGTTTGATAATGTTGCGAGGTGTGTTCGGGGGCATCTTGAGCGGAGAGTATTTCCCGGCCACCGAACCCGGCTTGGG	14.9363	14.4046	Ledidi
LE_1541	GCCCGCCGCCATATATATTACCCTGTAGGGAGGCGCTTGGCTTGTGCGGATCTCATTCGTGTGCCCACGTCACCAAACTC	16.2049	14.8452	Ledidi
LE_826	GAGGTTCAGGGCGATACGTCGTGAGAACCCAAAAAAATTTCATTGGACGTAAAAAAAGTGTCAGGTTCAAACTCCCGTTA	14.7861	14.0325	Ledidi
LE_5921	GATCGTGCACTGTTCCTGTGCTCCCCTCCGCGCTGCGTCCTGGAGTTCTCACCTGCCGGATTTTTCCTCATAGTCCCGGA	15.2078	14.2673	Ledidi
LE_1326	CGGGTCTGCTCAGCCTCTGCCCTCCTTTTCGGAAATGCGGCGTCTTCTCCGTCCCCCGTGAAACATTTTCACCCCTCACA	17.4833	15.9877	Ledidi
LE_3301	TTTGTCTCTTTCCCCTGGATGGCCCGCTCTTTGGACGGGGGGGGCGCTGGCGCTTTTACGCGGCTCGCCTTGTGGTGTCA	16.0316	14.2286	Ledidi
LE_168	GTTTTTCTTGTAATATATTTCTCTTGCTCTGACCGGGCTTCGGGGGACGGGTGCTGTGAATGGAGACAGCCCCTGGCCCA	17.2748	15.4981	Ledidi
LE_1668	CCAAAGACACACCTAGTGCTGCCCGAATTTGCGCCATTCTGGGTTTGGGGCCCGCCTCCGTGGGGGGCGGGCTAGAGTAA	14.5334	13.6205	Ledidi
LE_4284	GCTTTTTGTGTATTATTTTTTCTGCCGAACTCGGAAAGTTAGGAGGTGCTTCTTGTTTCTGGCGGTACACGGGGGGGAAA	15.8223	14.5915	Ledidi
LE_2951	GGCCAGACTCTCGGGGCAAGTGTATTTTGTGCCCCTCTTATTTGGGGCCGGTCTGAGCAGTCCACATTTGGAGTTCGTGT	14.835	14.285	Ledidi
LE_2026	GCCGGACGGACGCGGTTCGGGTATGCTCTCTTTGCGTGCTTAGAATTGTTTCTGTTCCGCTCGCAGCGGGCGGCTCCGAC	16.8839	14.7417	Ledidi
LE_2830	CCGAAAATTTTTACTTATTCACCGTTTCCCCATGGCCCGGCACCCGCCACCGACACGGCACTGAGTCGTTCGCACGGCAC	15.6539	14.582	Ledidi
LE_510	TGTGGCTCTTCAGGGGAGTATTCGAAAAAAAGCTGCGCCAGCGGGGGTGATGTCCCCCGGCGTCGTGCTCGGCCTGTGCT	16.0683	15.1366	Ledidi
LE_3211	TCTGTAGTAGTAATTTTCCGTAAAGTTGTCTCGTTTGTAACTTATGTAGTATGATATATTCTTGTCATCTGACACGTCGT	14.744	13.4088	Ledidi
LE_4139	GCGGACTTTTGTGAGATTTAATCGTCTTATCCAGGTGCCCTGCGTGTTATCGGCGCTTGCGTCGCCCGCGTTCTCGTCTC	15.1068	13.0201	Ledidi
LE_6158	CGGGGCGAAAACTTAATTTCCCAATGGGATATCAGCTTTTCTGTTGTCGCGCCATTGTGTAGGGTCGAAAATTCGCCCGG	15.6762	13.4716	Ledidi
LE_451	CTGCAGGCGCGGAAGTTGTTTAGTATTTCAGGGAGGCATTTTGGCGGGTCTACCGGCGAGGGTTCGCCGTCAGAGGGCGG	15.4286	14.9072	Ledidi
LE_977	GTCCAGGGAAAGGCTTTCCGTGCAAGGCAGTGCCCGTGCGCTTGTTTCGCCTTGGAAGATTTCTTTGTCGTGATGGGAGG	15.1547	13.8858	Ledidi
LE_513	GTGTACGTGTTTGTTTTGTTGTGCCGGTGCGCATGCTGGGAGCCGCTTGGGTAGTTGGGTGGTGCTTATTGTGGGCGCGC	14.8885	13.0669	Ledidi
LE_4348	CGGTCAGTTTGGACGTTAGGTTATTTGGGCGTAGGGGCATCGCGTTCCCATATAAAACTGGCACAATTTTGCGAGGGTCG	15.3409	13.4949	Ledidi
LE_1506	CCCTGAATATTTTCTGGCGTACAGGCAGGGTGCTTTTTTGTGCGAGGTCGACTATCAAAAATATTTTGGCCACGGCATTC	15.7836	14.0445	Ledidi
LE_6752	CATGGAAGTTTATCCACACCCATTCACTATGGGCCGTACACCAAAATTTAAGGAGGGATTTGGTCGACACACTCAACATA	15.726144790649414	14.561853408813477	Ledidi
LE_6011	CCGCTTGCCTTGGTGTTTCCAGGCGGGACAGTATGGCATTGGGGGACGCAAAATTCCGTTGAAAATGCCTTGGATAATTG	15.8558	14.8035	Ledidi
LE_1065	GGTCTTGCACGAGTCGAACCACCCCGTTTCCCCCTCTGTATTTGGACAGTCCCGGGAATTCCTGTTCCGCCGGGGGCGTC	15.4431	15.4161	Ledidi
LE_6493	TAATGAACTTTGAACATCTCTGACACTCTGGGTTGGTCATACATGGTAAGGTACATGTTTCGTATTGCATGATATTATTA	13.88122272491455	12.189947128295898	Ledidi
LE_2617	GCTCGCTGCTGGGGCTCGTGGCTCTAGGCGGGGCCCAGGATTGACGGCGCGCCTTCGGCCCATGTGCAGCCCACTCAACA	17.7329	14.424	Ledidi
LE_5878	TGATTGGTCTTGTGTGATCGTTTCCTTCCTGGGTTTGTCCGCGGAAGCCGCGAAATTCGAGCGCTGACCCGCCGTTTTTT	15.4926	14.0597	Ledidi
LE_4881	GCGCGCACAATTTGCTTCGACTGAGATTATTTTATCAATATTTTCCGATTTTTAGCTTCTGCTATCGGGGCATGCGCGGG	15.852	13.9661	Ledidi
LE_4082	TCTGCAGCGCTGTTTGGCACATTTCCTCGTTCCGGGAGTAGCGGGATTGTTTCAGCAAAACGGTGTACAAAATTTATCGG	14.8543	13.8112	Ledidi
LE_2627	ACGAGCCCGGCTCTTTTTTGGGCGTTTTTGTGAGTAACGCTGGCCTTGCCCATAAGTACGCGCATTTAAATACTTTCGGA	15.3103	13.5078	Ledidi
LE_6364	ATCCGCTGCTGTGGAGAGCGACCAGCATATGCTCTCGAACGCCTTCCATTTTCGAAATTTTTTTGTCCCAAAAAGTCGCA	16.0241	13.8362	Ledidi
LE_4796	GAAACGGGGAAAGTTCTCATCCCTCGTAGCGGGGACCACCGGTACAGCTGTTTTCCAAAGAAACATTTTGTCCGTTTTCC	16.3905	14.7877	Ledidi
LE_3904	TGACGCGTCCTGGTTTCGAGCACTGCACTCGGTGAAGATGTGCCCCGGGCAAATTGTGTGCACCAGACAATTTTTCGGTA	15.5945	14.9838	Ledidi
LE_2233	ATGAAGTTGTCACCAAATACGTTGGGTTCCTCATAAATTTCAGAATGAGAGGCTGTTTATGTGTTATAAGCTAGGCTTCT	15.8728	12.7357	Ledidi
LE_1923	GGCCTTCCAGGCTGGGCACGTGGTGCAGGCAGAAGTGGTCATATTATACTAGGGGCGCGGGGGCGAAAAGATCTGCCCTT	15.7515	13.2885	Ledidi
LE_1149	CGCATACTGAGCACGGCGCATGCGTAATTCTTTTTCGGGGAAATTTGGTGACGTGTGCTTTCGCCTTCCCGGGGTGGGCA	15.7136	15.1018	Ledidi
LE_921	TGGGGCCTGCGGTTCGCATCGCCTCTTCCTTAATTTTCGCCCGACTGACGTGGGAAGTGCTCACGGGGGGAGCGCCGCGC	15.8508	15.328	Ledidi
LE_4242	GCCGGGGTTTAACTTCGACTGCAGGGCGAGGCTTGGGTGTGAAAGTCTGTCGCGCTTTGGCAAGACTAAAAAGTTTTCAT	16.7504	14.1494	Ledidi
LE_1828	TCGGTGTATGACCCATGGGGGGCACTTGGGATGACGCAAAGAACGCGAACCGGGTTGTCGCGGTGACACAAACGGGGGAC	15.9407	15.2826	Ledidi
LE_1981	GCAATTTTTTGGTTTTCGCTGCGCACACATATATATTGCCGCAGGGCTGGACATGGGGTTCTGGTGTTTCGTGCAATGGA	16.5999	15.054	Ledidi
LE_1627	AGATCTTTTTGACATGCGCCGCCTCGTCCTGGGGGGCAGAGTTGTTGGAGGCGGAGTGGGGACAAAATGATCATCCTCTG	16.5183	15.2037	Ledidi
LE_2328	CTTGCAGGATAAGATAGATCCATGGAAGCTCTTAGATAGTCAAGACGGCTATGTGTATGGGTTACCCGAAAGTCAGTGAA	15.2062	11.7705	Ledidi
LE_118	CGCGTGCCCAGGCCTGACGACGTCGCAGGCGGACGCAGCCGTGTCGTATCGTCTAAAAACGGCAGGTAATACGAGCGTGC	16.1554	15.6374	Ledidi
LE_6688	AAGTAAGATGATCTAACATCTTTGGTTATACAGTTGTGCAATTGATACTCTTAAGTGTCGTCGCTAGTGATCTACTGTGA	14.859209060668944	9.81521	Ledidi
LE_1354	CAGAGGTGCGACGCTGCTATTCGCCCTGAGCCGGCATCGTGTAGGGCTCGTTCGAAGGATTTTTGTCTCACGCAGTCAGA	16.3364	14.9619	Ledidi
LE_1817	CGCTGTTTGTGGGTTTACGGACGCGCGAAAATGGGTCAAGAGAATTTTAGTGTATTTTTATCGGAAGAGGTAAAGGAAAA	16.7463	14.6574	Ledidi
LE_3775	CGCTCGCTAAAAGGTCGAAAAAATTTGGGCACTTTTATCCATGGGCCGATCACGGGAGCAAGGTGGAAATGCGACATTCA	17.1628	14.1542	Ledidi
LE_3420	GGCCCCAACAGGGTCGCAGCTTTCACGCCGCTCTAGCCGAAGACGGCTTGAGGGTGTCATGGCAGGGAGTCGACGAGGGA	16.1385	15.8147	Ledidi
LE_400	CATGCACGAAAATTGTAGAGGGAGAAATTTATGCGGTCGCCTCTTGTGAGTGAAATTTTTTTCAAATTTCTGAGAGTACA	16.9428	14.7504	Ledidi
LE_7042	AACATAATGTGTTACAACAGGTAGTGAGTAGTCTAAAGATGAAATTAGGGTCGTATACCATGACAAGAACCCTGTTATGT	12.88226318359375	10.9475	Ledidi
LE_2135	AGCCAGAGTTCCGTCTCGCGGCGTAAGTGCGGGTTATCCGACGAACAAGATTATTTGGGCGTAAGTTCGACCTAGGGCTC	17.3072	14.6358	Ledidi
LE_798	CCGTTCCGCGATCCTAACGTCCAACAACATTGCGTTTTTTGTGTCTCAGAAAAAATCTTTCCGGAGCGTCCACTTGGCGG	16.9617	14.9501	Ledidi
LE_4446	GGGTTCCACCCTTCTCTGTTGCCTTCTTTACCGTTCGCCCCTGAGAAATGATCCGGGCCAAATATTTCGATTTTGCGTTC	15.295	16.2268	Ledidi
LE_840	CTGTGGCCTCGTTGAAGATCCGGGGTCGAAACGGATCAGGCCCAATGCGGGTGACTGACGCTGTGAGGCGCGCGGGTTGA	17.1838	14.7992	Ledidi
LE_937	ACCTGGAGGGGAGGGCAAATTCTTATAAAAATGCACGCGGCGCGGGCGTGCGGTGGATACTCGGTCGTGGGGGGGGGCAC	17.8416	15.25	Ledidi
LE_6302	GCAAGGGGTGATAAGGGACCGCGCCCGATCCGGGGTCGAGTAGCCAGTTTCCGCTCTGGCGATCGAAACAACCCCGATCC	14.7632	16.1015	Ledidi
LE_600	GTCTATAAGTCCTGCCCGCGCGGGGGGCATTCGCTCGTGGGAATTTCGAAGCAAATTTTTCAGGTTGAGGGCTCTTCCTT	16.9088	15.1617	Ledidi
LE_6849	TTCACTAACTCGATCTACTGGTAGTATACTTTCTAATGATCACAAGTCCGGCCGTCGTAAATGACAGCTATAGTCTCTAT	11.789416313171388	11.357802391052246	Ledidi
LE_2358	GGAAGGAACCTTGCAGGTGAACGGTCACAGGGCGCGGTCTCGCGTGGTAGGGTCGCACAGGGTTATCGGGCTTTTGACGA	16.9968	15.1332	Ledidi
LE_3060	CGAGGCCAGAGTATCTGATATTTTCCCCGCGGCTTCGCCTTCTGGGAAGTGGAATTCGAGCCGAAAAAAAAGAACGTGAT	16.8121	15.3232	Ledidi
LE_4766	GCCTGATGTACGGCAAATATTTTTACATCTATATATAGCGTCGAGATCTTTATAGTAAAATACGTAGCGTCCGTAAAACT	15.2623	16.8709	Ledidi
LE_2781	CAAGCGGGCCGTTTGTCACGCGCATTGTTTCCTAGGGGTGGCGCGTACGTGCACCCTATCTGGTAATACACCGGGGGAAA	16.6117	15.7384	Ledidi
LE_4197	TGTGCCCGAACCGTGACGACCAGGTACTTTCCCCGTGTTTGGAAAGGAGGGTGAATTTATTCCGCCCCAAACGCGGTCTT	16.3097	16.0618	Ledidi
LE_2415	TCTTAGGTCAAGCGGAACTTGTATTTTTTACTTAAAAATACTCGCTTTATATATAAATACACGCTTCATAAAAATAGTAG	17.6795	15.9615	Ledidi
LE_6604	GTAATTCTAATGAGCCGGGTTATGTGGGATACACACCTATTGAGGTGCTATTGACATGATGGTGACTATTGTAATTGTGA	13.547233581542969	9.749906539916992	Ledidi
LE_3566	CCGCTCCGCCGCGCGCGCGACTCCTTTTTATCTAAAAAGCAAAAAGATTTCCAGGTCCTCCACGTCACCGCCTGACCGGG	17.3474	15.2757	Ledidi
LE_3867	ACATGCAGAGACGGGCATGCCCGAGCGTTCGTCTCGAAAATACTGGTGAAAATTTGTCTGACAATTTCTCAGTCTGAAGT	17.519	15.1577	Ledidi
LE_5357	CGTATGTCGACGATGGTGTGTCTACGCGTCGTGAATTTGCTCGCGCGCGCTTCGGACTGCCCGCGAAATTCTTTTAGTCT	17.5159	15.4747	Ledidi
LE_1434	ACGTGGCGGGTTGAAATGTTCCGGAACCCTCGCTAGGGGTCTTCTGAGTTTGGAAACTATATATATAGTCCTGGTCTTCT	16.5899	16.412	Ledidi
LE_4690	TGTGCTTTGTTATCGCTCCTCGGACTACCCGGCCTGGTACGTAATTTGTCCCGCCCCGATCAGGCCACGAAAACCCCTAC	17.8265	15.9996	Ledidi
LE_6304	GGTGCGGGGGCCCAGAATTGTCTAGCAGTCGGTCATTGGAGACGTCACGCTCGCACGTGCCGGTGGACGAAAAAATGTAT	17.5475	15.5532	Ledidi
LE_3476	CTGGGACAGCCCGGCGAGTTTTTACGACCGTCGGAAGACAACCTCGTGTGCATGAAAAATTGCTTTCCTCCCCGGCCCAA	16.8489	16.3434	Ledidi
LE_4716	CTTCAGTAGGTAAATTTTGTTTGTCCCTGCACACCTATATAAAAGGGCGTGCGCGCCTGAAAAACTGGTTCCGGCAATTC	17.7994	16.4896	Ledidi
LE_6226	ATGCCCCGGGTGAGCGAACGGGGCGGCGTTATCGGGATTTTTATAAAAATTATAAAGAGATTTGTTCTTCTCAAACTCTT	18.326	14.8871	Ledidi
LE_5482	TCGAAGCTTAAAATTATCGTGCGTGGAACGCTTCGACGTGCGCACTGGGTTTACCGAGGAAATAATTTTTTCTCACAGGA	18.3248	14.9781	Ledidi
LE_67	CGCATAAATGAGGTGGGCTTTCGCTCACAGGGAAAACGAAAGAAAAAATTATAGGGAGGCCCGCAGAAATAATTTTTCTC	17.9194	15.7785	Ledidi
LE_5185	GCCTCTGGGGGACGCGGGCGTGTCGGTGTCGTGGCTTCGGAATATAAGGGGCGGAGACGGGGGGTGTTCGTTTGCGCGAA	17.1714	17.094	Ledidi
LE_206	GAATGTAGTTCTTGTAAATGTATATCCTTGTAATTAATCGTAAAAAAATTTTATAAAAAGTGTTTATATACGTGACTCTT	11.247	11.4121	Ledidi
LE_5258	TCGGTTCGCGGCCGCGTCTCAAGAACCAAATTTTTTTCCGGTCCCGCCTTCATAGTGCCGCCCGCTTTTTCGTGACAAGA	17.9276	16.4178	Ledidi
LE_5580	TGCGGGCCCAGCGGCGGCGCGCATACGGCGAGCGCTCGGGCTTTGTGTCACCCTGAAGCTCCGGGGTAAGCTTCGTGCCG	17.322	17.1128	Ledidi
LE_6897	TAGAGTGATTTTATAGAGGTTTATGTTTGAAGAGGATTGTAACTGGGTACGACGTATATCAATTTAACAGGTCTCCATGG	10.803180694580078	11.301493644714355	Ledidi
LE_1895	TACAGTGGATAATTCTTGTAAATACTAAACAATAATTTAATCTTGCCCTATAATTTTTCTTATTATTATATGTATAGTTA	9.99333	8.43253	Ledidi
LE_7092	GCGTTTTTTTTTGTTTTCTTTGTAATTTCTTGTCTTGTTTATATACATAAATATTTTTTTGTAATTTTTTTTACCGTCCG	20.472145080566406	17.530323028564453	Ledidi
LE_7120	TTGTTTTTCTTGTATATATAGTTTTTTATATATATATAAAAAAAATTTTTTTGAGGTATATAAAGGTCGAGGTATATATA	19.329740524291992	21.0955	Ledidi
Ada_572	GCCCGACGTAGAAGCTTAATGACGCTTAGGCGTTGTTCCGGGTGGCCTTGAGAGCAATGTGGGAGGCGTTTTCTAGCGGA	16.1093	14.531	AdaLead
Ada_111	CCGGCGCCCTACATAGCGAAGGAGGGCTTCGTCAAGCGTTCTCCGCATACACGCGTTTTTGCAGCGTCCCCGCTTTCAGA	15.5561	15.1115	AdaLead
Ada_913	TTCGGTTACTCAGTTTGGACGAGATAAATTCCGGACTTTTGAACATTTGTTGCCTCCCTCGCGTTAGATTTTCCTGAACA	15.5838	13.6755	AdaLead
Ada_550	CTTCTTATGTGTAGATTTTCTCTATTCGTAATTTATAAAACGTAAAGCCCTAAATTTTTTAGCCAGCGGACTACTAGTGT	15.0392	12.8268	AdaLead
Ada_1234	ATCTGAGGATTAGCTGTCTTGCGTCCCTAACATCGGATGCGCAAGATATCCGTCATACCGGGTTACCCTGACTTTCTATC	16.16986846923828	14.748689651489258	AdaLead
Ada_93	GTCCAGAAGTCCGTCCAACAGATCGAAAATTCGCGCGTGGGAGCTTTTTAGCAACTGTTTGAGGTTCCGTGATTTTCCTC	15.7015	14.2174	AdaLead
Ada_383	ATAAACGGGGTTACCGTAAAGGTAGTGGCTCCCGGGCGCGGAGGGTGCAGTAAATTTTATCTCGACTTTTCGGTCTGAAA	16.6012	15.1314	AdaLead
Ada_872	TGGCCGGGTCATCCAACTGGATGAATTTTTCGCTCAAGTGAGGTCACAGGATAACAGTATCCTGACGCTGCTTTTAGTAG	15.2291	12.5919	AdaLead
Ada_297	TACTCCGGAGAATTCGTTTAACGACAAAACAATTATTGAAAATTTTTATATCATCGCTCGTGTAATGATCCGGGTACAAA	14.5742	12.484	AdaLead
Ada_984	GGCAATGTTGTGTAACTGAGTGACCGAGTGCCGTTTTGTTCTAATTTTTCACAGTTCGCGATTGACCTTTATCCTCGCGA	15.6855	14.8235	AdaLead
Ada_428	AATTTTTTAGTATGTCCGAAACGGTGAACTCCGCATCAGAAAGGCGATGGAGTGTTAGCGCGGCGTGGGCAGTTTTCGTC	16.7763	14.7854	AdaLead
Ada_798	AGTCGGGGTGGTATCAGATTGTTGATTTGATATGGCGCGGCGTTCCGGTCGCTCCGCTTTTCGCGAGTTAATCGCGGATT	16.1045	13.8934	AdaLead
Ada_1250	GTTTATTGACAATTCCTACACTCCCCTTCGCTTCGCGTCGTTCGATTATAATGTCCCGGATTTTTCGTTCTCCAACCAGA	15.370619773864746	14.51736068725586	AdaLead
Ada_283	CCGAATGTGTGGGTTGACGTAGCCGTAGTATACGGAGAATGGAGGTTTTGGTGATTTTGACCGGACCTGGTATAGTAGAA	17.2466	14.5607	AdaLead
Ada_563	GAACCACAAAGCGAATTTGGTTTTCTTAGTATGGGTACCCGGCATGATACAACGTGGAATGGAGGATTCATACGCGCCGG	17.6491	13.5133	AdaLead
Ada_1170	TCACTCCAACGTTGGCACAATTTTCTGGTCTAGCACTGCGCATTAGGTCTGGGTTGTACCGTTAGGTTTCCGAGCAGATC	14.506686210632324	13.965490341186523	AdaLead
Ada_387	AACGATATTACTCATCAATCTGCATAGTCCGAACTGTACCGTAGAACATGCTTTAGCTATCCGGTTGCTCGGGGAGTTTA	15.2366	13.6076	AdaLead
Ada_505	TCCGTGCCCGACCTTCTGGCTCCGTACGCCAGCGGGCGAATATCGAGTCCGTGGCTTGGGCTTATGTTAGCCGGTCTCGG	16.6317	15.2169	AdaLead
Ada_1156	TCGGAGGTTTAAAGTAACGAGCGAGGTGCGCTCCGACAGGCGACCGAGTTGAACCGCGGATATAGTTTGTTGTCACTGGA	14.751461029052734	14.42464828491211	AdaLead
Ada_238	CATTTACTTTCTTATGACGCACAGGCAGGGTGCTTTTTTGTGCGAAGCCGACTATCATAAATGATTTGTCCACGGAATTC	14.5888	12.6766	AdaLead
Ada_883	TACGCTTGTGGAAGGGGCGAAATTCCCATAAATTCGGTGCTACTCTGGTCGGCGCACTCCTCGGCTCTGAGGATTTGTAG	15.7362	13.9943	AdaLead
Ada_376	TATGCGTACTTCCGATATTGATATTTTTTATTTTATCATAAAAGCGTAAGATACAATATCACTTCCGACAATGATCGACG	14.7818	12.6332	AdaLead
Ada_750	GCAATCAGTAAAGTTTTTCATTCGCGTAGAGGGGACCCGAGGTAGAGCGGGAGTCAGGCTACACTTTCGCTTTTTTGTAC	16.053	14.5139	AdaLead
Ada_224	TTGTTCCTTGCTATATCGTTTAATAATCTCCGCTTGTAGGCACCCGTCTCCGGTATTTCTTTTTCTAGTCCTTGTCTTCC	14.9663	15.1371	AdaLead
Ada_413	TTGAGGCCGTGGGTGTTGACGACCCGGATGTTAGTAGGGCTCGCCTCGCGCGTTTGTAAGGGTATTTAACCGGGTGGGGA	15.9396	15.2427	AdaLead
Ada_194	GAACTAGTAATCTGGGTAATTCGCGCACCGTAATACCCATGACTCGAAACAAAGCCTTACCGTTGGAACATGTGGACGTG	14.0662	13.1195	AdaLead
Ada_19	CGAGTGGTTGTACCTGATAACTTCATACGAGGTCCACGCCTTTTGGTTTTGTAAAGAAGTCACAGGTAATACGCGCAAGC	16.1236	13.9579	AdaLead
Ada_13	CGCCTACATCGGGGGGACTTCGGCGCCGAGGAAATTCAAATCAAAAGATTAAGCGGAGGACCGTTGACACAAGTGTCGCA	15.5211	13.9444	AdaLead
Ada_1129	GCATCTTTCCGGTTTTAGCTGCGTACATGACTCGTTCTGAACACGCTTTCCAATCGGGGTTATTGTTCCTGTTCTGTGGG	13.816200256347656	14.171345710754396	AdaLead
Ada_178	TGAATTTTGCGTTCCGCGAAAACGGAATTCTTATTCTGGGAAAATTCGTGATGAGTGCTTGGGTCTTCACTGTGTCTCCA	15.9074	13.0344	AdaLead
Ada_311	GTACGGCTTTCGTCATAGGGTTGTAATTTTCCGGCGGAAGGACCTATTCTGTCAAGCGTCAGACCGGCGCAGGCCGATCA	15.2981	13.5325	AdaLead
Ada_822	TGCGCCATAACGTACGAGGCCGGGTTGATCCGCCATCCCGAGGGTGCTGTGAAACTCTTGCGCTCTTCGCTTGCGCTGCC	15.8537	14.5648	AdaLead
Ada_765	GTGCGCGCAATGTACCTCTATAGACATTAGTTTTTCACACTTTCTCGAAGTTGCGCTCCTGCGATCGGGGCATGGGTGCT	16.4954	14.9123	AdaLead
Ada_5	GCACAAAGCAATCAATAGCGCGTTGCGCTTTGAACGGTGATATCTGGGCTGGAGCCCATGTCGCGCGGAGGCGTGGGGTG	15.7723	13.7973	AdaLead
Ada_958	GATGGAAGTTTCTTCCCAATCAGTCCGTTAGTGCCGTATACAAAACCTCGGAGATGGATTTCCTGGACACATGAAACAGT	13.5241	12.3417	AdaLead
Ada_137	TGTCAGCCAATATCGGCTCTTCAAAGCGAAAACCGTTAAGTAAAAATTACGCGTGCGTTGTCAGCATTCTTCGGTGAAAG	15.0443	14.1836	AdaLead
Ada_517	ATTGTCGTTTTTCATTCTATGCACCGCTCGAGGTTCAGGCTGGGCGCTATAGCACGCACGTGGTTCGCCTAGTGGCCTCG	16.0256	13.542	AdaLead
Ada_650	ACGCGTCAGACTCTCCTTTCGAGTAATGAATTCGTTCAGGGCGACTCGTATCCTTCCTAAGCGGTCCTAGACTCCATGGG	14.365	13.2149	AdaLead
Ada_557	GCGAGATTTGGTTGGGACGGCTCTTCTTTGGATTAACGGCTCCTGGACGACCCGCATATATCCGGATACGTCGGATGGGG	14.8046	14.7603	AdaLead
Ada_566	AAAAGTTGTTTCGTATCGATTTCGCTGCGAAGCCGGTGCTATCTGTGAAGGACGTGCGGCACGTGAACAGGTATCCGCGA	16.1882	13.4928	AdaLead
Ada_867	TTGTATTTTCTTGGAAGTAATCTCCGATGGCCGGGGCGGCGGCCTGATACTTTCACGCGCCATTGCCCCGCCTTCAGAGT	16.5977	15.5648	AdaLead
Ada_742	ATTGAAAAAATAAATTATTTTTTTCATAGAACGCCTATAGAAAAGTCTGTGCGCTAGTGAGCGACTCGCGCCGGCGATCC	17.1029	14.4839	AdaLead
Ada_546	CCTGCTATTTAAATTCTGCGTGCCGAGATCCGGCCCCGAAGAGCTGGGCTGGAAGGACGATCGGTGGTTCCAGGGGGTCT	15.7304	15.2647	AdaLead
Ada_432	AAAACGTATACTATGACAGGTGAATTCATTCCGAGGAGTAGCGCGCTCGTACACCCTGTGTGGTACTAGACCCGTGTGAA	15.0616	13.6538	AdaLead
Ada_25	ATTTTTCTTGGAACTTAGATCTCTTGCGTATGCGGCGCCTCGGGGCACGGGTGTTGCGCATGAAGAAGACCCCAAGATCA	16.6664	13.8881	AdaLead
Ada_120	GCATTCCGCCTTTATACCTTCCTAGAAAATTACGTTTTTAGTGTCTTCAAAAAATGAACTCCAGTGCGTCCACGGAGCGT	15.6925	13.7713	AdaLead
Ada_691	TGTACGCGGAAATTTTCACACATCTCTGCATAGCTATCAATCCGTTGTGTCAACGCTGGTTTCACTGAATACCATTGGCG	14.0406	12.5235	AdaLead
Ada_1005	AAGAAGATATTGTCCGATTGGCTTATCTACCGGCTACGGTCACTACTAACAAAGTCCGGTATGTCACCTGACGCGGATGG	13.961817741394045	12.811361312866213	AdaLead
Ada_497	CTAGCCTCGGGTCTCTACATGTGGTGGTGCGCAGTTGATTTAGATATGGTGCGTGGTGTTTTGGTGGTCGATTTTTCGGA	14.3592	13.4031	AdaLead
Ada_163	TGCAGAATCGGCCAAATCGCCGGGCGTTTCAATTGTTTACCGCGAAAGGTCAGGTGGAGTACGCGACGGGCCCGACAAAG	15.1706	14.5884	AdaLead
Ada_424	GGGATGGTCCATTGCCGCTTCTTTACGCACGACGCTTTAGAGACTAGATCTGAAAATTCCGTCACGCTCTCTTTTCTGGT	16.0191	15.0933	AdaLead
Ada_1220	AGGGGCGCATTTTCTAATGCCGTTACGATGTTGGATTACCGAATGGGACAAATTTTTCCCATGGGGGATTGCCAAGCCCA	15.4491	15.8391	AdaLead
Ada_924	TGATTGGTCGTGGATGCTCATGTACTTGCCGGATTTGCGCGCTAGTCACCCGCCGGTCAATGCCCGACCATCGCATCGTT	15.8193	14.7783	AdaLead
Ada_1161	TTCGGCTGTGACCGATATAGGGATTAGAAGCCGTGTAGGCTCTTATCGGTGTAAATGCGCCTCGCTTCGTCTTTTGTAAC	15.009835243225098	14.958986282348633	AdaLead
Ada_229	TTTCAACCAGCCGTAAGGTGCCCGATCCATGAACGCAAAATCACGGGTTTGACGGGGCGTAGCAGAAGTCGGCTCTGACT	15.3478	14.0922	AdaLead
Ada_890	TTTTTCACGACCGGACATTTTTAGTGCATACTATATACTTACCGCGTATAGTGGTAGACGGCGCGCCTACTGAGCTCTGA	15.3612	13.6153	AdaLead
Ada_976	CTACACCGGGTTATGGAATTGGGACGCGTTTTTAGCTTCTTGGTAGAAATGCAAACGTACGTTGTATATATGAATTTCAA	15.5329	12.2398	AdaLead
Ada_965	TCCGTATAAAGGAATAATGGAAAATCGAATTTGAGCATGTTTGTTGTGTCTCCTGTGGCTAGGGTCGAAAATTGGATCCG	16.529	13.6207	AdaLead
Ada_41	CCGTGCCATGCGTCCAACCCGCAAGTTTCATAGGTGAAGTCTTTGTTGCGCATAATATGGGGCCGATGGAATCGGAGGTG	13.896	13.2729	AdaLead
Ada_169	CTTGGTGCGCGGGTCCCGACACCTCGTGGGCTGGTCGGCTTTTGAATTGTGATAGGGCTAGCGGTTCGCCTGGGCGAGCA	16.8437	14.5308	AdaLead
Ada_142	TTTAGTTTCGGGTTCGCATCCCTTCTAGCTTAGGATTTGTACGCGCGCAGTGGTAGCTGGTAATCCGAAGCGACCGGAGT	15.1877	14.4197	AdaLead
Ada_926	AGTAAAGCCGGTCCGTAAAATGCCGGTGTCTCATCTTGATCTATCGGCATGACCAGGGTAATCGGAGTGATTACGGGGAC	17.2892	15.2278	AdaLead
Ada_416	TCCCGCTTGCCTAAAATTTACCAGTTTGCGCTGTTCCATTATCTAGAGGAGGTCCGCATATGCGCGTACAATGGGTACGA	13.6803	13.2168	AdaLead
Ada_214	CAGAGGACGGCCGCTTCGACGCGCGCCGAGTTGTCGTCGAATTTGGCTCGTCAAAACTATTGGTCCGAGTCGATAACTGA	16.955	14.3102	AdaLead
Ada_847	AGCTTTTTCGGCTCAGTGGATTGACTTGAACGGAGGAGGCGACGGGCACGGGACGAAGGACGTATCACGGTCCGGCAGCG	17.1396	15.7845	AdaLead
Ada_1091	CAGATAGGTGCTGTCAGACTTGACATGCGGCGCTTAAGTGCGTGGCCTCTGGTAACTCGGCAATACCCAGGCCGGCACTG	14.777216911315918	13.988754272460938	AdaLead
Ada_998	ATCCGCTGTTATGGCGAGCGGGCATAATTCTTCCGCGAACGCCATTGGTCTTCGGATGCTTTGTGCCGTACAAATTCCCT	15.3937	14.2251	AdaLead
Ada_900	AATCGGCCTCCGATATGTCCGTAAGCCCCGCCCGGGAAGCCGTGACCGATGGAACTTGAGCGGAGAATGGTCTTTCGCAT	17.481	15.9398	AdaLead
Ada_502	TTAGTCGTAGATATCGACAGTTATGTTAGTGTGCCTGTAAATTCCGTTATAGGATATATCATTATCATCTGACACGACGT	16.1065	14.0625	AdaLead
Ada_954	GCCCGTAAGGAGTTACAATGAATTGAAGCCTTGATCTCTATGATAGCCCGCCGTAATTTTGGCACGCTGCCGTATTGGTA	15.4739	12.9077	AdaLead
Ada_189	CCTCTATCTCCACTTCGCCTTTTTACCGGTGCACATATTTATTCCCTTAGTTGGATCCTTGACCACAATGTCTGGGTGCC	15.8083	13.3877	AdaLead
Ada_47	AAGTATAGTTGATTCGACTTTATGCGGCGCATGTCCGACATCGGTCGCGCACCCGGCGAGCTGAATTTCGTCGTCCGTTA	16.9097	14.8291	AdaLead
Ada_839	CACGCCGCAATTTGAAAGCGGAGCCAGGCAGCCGATCGATGGTTCGGAGCACACTCGACCCACGGCCTCCCCCCCTCGCA	16.7167	15.6458	AdaLead
Ada_642	CGAATAAGCGCGCCGGGCCAGCCACGTACCACGTGCACGTCTATATAGTACTGGAGCCGCGTTACAAGGAGGAGCTCGTA	15.7173	14.3764	AdaLead
Ada_1074	AGTCGGTGCATCGTGGCAAGCTCACTGTCTGCCCCTATACTCTGCGGCCGGTCGCCGGAGTCCACGTCCAGAGCGCGGGT	14.788996696472168	13.861638069152832	AdaLead
Ada_599	CGCACGGGTACTAGATTCCGCTTCGGGCGCTTGCATGGGGTGAACCACGTCCTCCATGCTCTCCGCAGTTAATGTGTGAG	14.3399	13.797	AdaLead
Ada_327	TGGTCCGGCTGCATATTGAGCGGGCCGATGCAGGAGGCGTGAACAAAGTTCGTACGAGTGACGCCAAAACACTGAACACG	15.8841	14.0987	AdaLead
Ada_1020	GGAAGAACTTTGCACATCTCGGGGCCTATCGTCTGAAAATACATAATACGGCACCTGTAAATTTTTTCATGAATTTTATT	18.44538116455078	15.807348251342772	AdaLead
Ada_1131	TTAGTATCGTCTTTAACGGTCAAGTTTGTCTATCCCAGGTCCCTCTGGATTGTGCCGATGAACGTTGCGCTGCTTAATGA	15.441407203674316	14.625307083129885	AdaLead
Ada_4	TGTTTCCGGATAGAATTGGCTACAGCGTAAACGCGTGATGGCTGGTTTCGCCATCCAGGTAAGTTACCCCTTTAGGACCG	16.078	14.2176	AdaLead
Ada_611	TGACTCATCCGGACTTCGGGCAGCACCTTCGGGAAATATATACGCCGGGCATATTGTGGACACCAGGTACGTTTTGGTTG	14.4701	13.0586	AdaLead
Ada_514	GGGGTGCCGAGAGGGTTATTTGAAAGTTGCGAATTATTAGGTGGTGGATCGAGCGCGCCGCGACCGCCATATTCAATTAC	15.6485	13.3947	AdaLead
Ada_991	GTCGGTGAGGGTAAGTATTGTCTAACTGGCGGCCAGAGGAGGCGCCACTCTCGTGCGCGCTGTTTGACGTCCAAAGCTAT	17.3591	14.0445	AdaLead
Ada_105	ATAGTAATTCTCGCGTGGCAAAATGTACGTTCAGCTATCGGACTTCATTTATCGCAGCCCCGTGGGAGGGCGTGCGAACC	15.8452	13.875	AdaLead
Ada_879	CGCGCATGATATGGCCCCGCCTAACCGGAAAGCAAACGGGCGCGGTGTCACCCTGAAGCTTACAGTATGGCTACTTGCCA	17.2211	13.8718	AdaLead
Ada_1054	GTACTCTTGGTAAATCTATTGATGTAATCTGCTTATCATTTTGTGTGCTTTTTTGCTGGCCCATTGGTATTTAGACTCCG	15.484441757202148	14.198931694030762	AdaLead
Ada_199	AGATCAGTCGTCGCGTTTCGCGAAATATAGCCAAAGTCCGCTTGCTTCAATGTTCACTCTTTACTGACTTCTTGTGTGAG	14.5798	12.8402	AdaLead
Ada_1142	GTAGACAGCTGTAGTTATGAGTTCGCTTCCGCTTACGAATTTGGCAGAGGCTCACGTGGCGCCACGGGCTACCCCTCTTG	15.098211288452148	14.499244689941406	AdaLead
Ada_218	TTTTGAAGCCGCTTAGGACTTATGATGTCTGGGTTCCGGGCTCCTCTTTATTACCGGGTTGGATGGAGAGAGTGGCGACA	17.4547	15.6562	AdaLead
Ada_1033	GTGTTAGTAAGTGCACCCCTTATTTGCGACTCCCACCGCGAGAGGTAGGGTCGTCGTGATTGGGACAACGGTACAGGTGG	14.217004776000977	14.240117073059082	AdaLead
Ada_774	TCTCACTTGTGTGAATCGAATTTACTTCGCTAAAAATGCGGGCGAGCGACCATCCGAGGGATATCGATCGATCACATGCG	15.5584	13.2037	AdaLead
Ada_52	GGCCGAAGAGTTTAAAAAAACTCGCGGTGCAAAATGGTGCACACTCCCTGACTTCGAGAGAGGTAGGAGTTCTGTCTTGT	16.5017	13.8617	AdaLead
Ada_665	ACAGGCTCAGTATTATTTTTGCTTTGTAATTCGGAAAAGTATTTGGCGCTTTACGGAGCTTGAGGTATGCTGGGGGTAAC	13.8453	12.9235	AdaLead
Ada_631	GTATTTTTGCGTTGTGAAGCTATGCGCACCATAGGGTTACTGCCCGTGTACACCCTACGAAACGGCGCTGCGAGATCCTA	14.6026	13.9414	AdaLead
Ada_662	TCGGTGTTTCACATTCTACTTAAGGGCCGCGCTTGACCGTGAATGAAATTGGGGGACCGGCGAGTGTTCTCGGTACTCAA	15.605	15.6681	AdaLead
Ada_393	CACCCCAATTTGAGGCAAGTCACTTGTTTGCGGTAGCTGACGTATATATAAGTCATTTTTCACGGAGCGAGCGCACGTCT	16.9156	14.561	AdaLead
Ada_949	AGGGGTTTTATAATACCGGGTGGTGTGTACGGGCTGATCTTGCTCGAAAAGTATTTACGTGCCTTTGTACATTGGCCGGA	15.2446	13.5115	AdaLead
Ada_734	GCCTGACCGGCACCTGATGAAGAGGGGTCCCCGGCTGACCTAACTACTCGGGTGTGCTAATCTCAAAAAAAAGGTCGGGG	16.2276	15.3876	AdaLead
Ada_636	CCTGAAACGATGGTTAGCCGATGTCCTCCGCGTAGGAGTAGCTTAATTTTTATACCGAAACGGGGATCCAAATTGATCAG	15.5832	15.0613	AdaLead
Ada_99	CAGTAATGCCCTCTCTCAAGCTGGGAATCGACTTAATAATATTGTGCACGGCGCGGTGTGGAAATTTATAAAAGACTTCG	15.4086	13.3662	AdaLead
Ada_850	AGTGATGTGTTATGGTCGTACGGCGCAGCTCCTCGGGTAAATCTCGGCACAGACTAGTGTTCTGAACGAAACTCGCCCGA	15.6213	14.3868	AdaLead
Ada_274	GTATATCGTGAGAAAACCTCAGACTCATGCCTTGTCCGCAGGGGCGTGCGTATGTCTGTGTGCTTACGAAACGCAAGTCG	18.0573	16.5192	AdaLead
Ada_971	GACTCGGGGTATGGTTTAAGAAGATATCGTTTTCTCGCAAGCGAACGAGTTTCTTCATTTTGTCAAAACACCATCGGTAG	14.809	13.0817	AdaLead
Ada_304	GGCGTTGAATACTGGAACAGTGGGCCAAGCCGAAATGGCCACGTGAGACTAACGGAGCCGGCGCGAAAGGGTTAGCCATT	14.986	13.8838	AdaLead
Ada_749	GGATTTTATTTTTCCAAAACTTTGAAATTTACATCGGGCTTCCTGTGCCGTAAAGGAATGTACGCAGCGGCGTTACGAGC	15.5136	13.699	AdaLead
Ada_63	GAGCGCGGGTACTTGCCCAAATCTAATATTAACCGTTTTGATCATCCGTGCCGGAGTTTTCTATAACGGACAAAAAAGCA	14.2028	12.8617	AdaLead
Ada_32	TAATCCTCTTTTCGGACACGAAGGTTGTTGTAGTCAAGGCTTAAACACGATCGGCGCCGTACTTGCGGTCTGGGTTTTTT	14.653	13.7918	AdaLead
Ada_180	TGTGTCGACATGTTTCAGGCTTTTCGCTGATAGCTGCGTCCTAAGGGGCGTGAATTGCTTGGGTTTTCTGGAGCGCCTCG	15.1142	13.5138	AdaLead
Ada_1035	ACTGAATCCGGGTTATGTGCTGCAGAGCCCATGGGTAAGAGATGAAAGCGAGACCCGCACACAGGCGACCGGGGCAGTAA	15.015563011169434	14.450181007385254	AdaLead
Ada_129	TCCTTGGAGCACGAAACGCCGCGACAATACGGAACAACATAATTTGTCGTATAGAAGGTGTCAGGCTGAAACCTTCCTTC	15.0671	13.476	AdaLead
Ada_783	TTGTGTTGCTGTCACCCTACGGTCTGGGAGTTCTAAATAAATCCGATGGCTATGCCGTTCGGTAGGGTGCCGGGATTCGG	14.4975	13.0757	AdaLead
Ada_1098	TAAAGAAGCAGCGTCGTGGAGTTAAATTCGCTCGTAGAGAGTGACCCGTCTGCATGTGAGTCGGAACGTCAGCGTCGGAC	17.51081085205078	16.150318145751953	AdaLead
Ada_465	GCGTAAAGCACTTGAAAGATTAGGTTTTTAAATATGGAAGTTTCTGAGCTGTAGCCTATTCACGAGATCGTTTCCCACGA	15.7193	14.0717	AdaLead
Ada_1146	TTAGTGTGGCAGCGGCATCGTCGGTCTTATATACGTAACGCGTGATCGCATCGACCCGTAGCGTCCACATCACCGGCATA	15.595837593078612	13.7928	AdaLead
Ada_759	TACATCCTATCGAAATATGTTCAGCGCACGTGACGGACGCGGATATGTCGGTGTTCAATGCTGCGCGTGCAACCTACTGA	15.6544	14.078	AdaLead
Ada_684	TTTCTTAGGTATACGCGCTATATATACGAGATGCGCCGAAGCTGGCTGTCAAGGTGTCGGTGTTGCGTCTTGGGGTCGTT	15.1175	13.2556	AdaLead
Ada_659	GGTTTCCGAACCGGCAGTACCAAAAAATTTCAACGTCTTTTCTACCGCGCCCGAATTGATTCAAATCCAACCACCATGGT	17.0386	15.3528	AdaLead
Ada_721	GGGCGACGTTAATTCGGATACCGCATAAAAACTTGGTTCCCTTTACCTTATAAATGCTCGCCCCAGTGCGCCTTTAGGTG	15.3481	14.9733	AdaLead
Ada_1083	TGCTCGCCAAAATGTCGAAAAAATATCGGCGACGTTAACCAGGGGCCGACCGTCAGAGTAAGGTGGGACTGCGAATGACT	14.45711898803711	14.473776817321776	AdaLead
Ada_1178	AGCCACAGTTCCGTCTCGCGATCTAGCTGCTGGATATCCTCCGCACGGGCCTAGATTAGGGCAGATTACTCTTAGGGCTA	14.894782066345217	13.179837226867676	AdaLead
Ada_857	ATGGGAATTTATTTTTGTTAAAAATCTTCCTAGGTGTGGTTCTCGCGTGGCAAGGGGGACACGTGCACGTTTCCGGGCTG	16.4635	13.9005	AdaLead
Ada_117	TCATGCTTCCTTAGCCGGCTTGATTGAATTTTTTCTTACTTATAACGCGTTACGTGAGTCTGAGTGGGATAAAAAAAGCC	15.068	13.5748	AdaLead
Ada_75	CGTGTCTCTTCAAGGCGGATATCCTAAAAAAGCTATGCCGGTGAGGGTTTTCTACACCAGAAGCGATTTCGGCTTGTGCT	15.4141	14.9182	AdaLead
Ada_493	GAAATTCAGTATAATTTTCTTCAGGCGTCGTAGCATTCACGAGGATAGGTCTGGGCGTTACTTACCCTTATGTGCGCTGT	15.2293	14.2342	AdaLead
Ada_604	ATTTGACGATGCGTGCATGACCGCGCGCTCTTAACTTTAAACCTCGTGTCTTTTTGTCTGACAATTTTACAAGCTCAAGT	15.9838	14.017	AdaLead
Ada_158	GGTCGGCCGCTTGAGGGTTCGCTAGACGCAATCTGTACCTGATATATATATACTCCTCCTTTCCTATTTAGGCCCGCAGC	15.1367	15.5878	AdaLead
Ada_354	CTCGCATCTAAAGACCTTCTTTTGCCGTCCGATCACGGACGGGGGAGGTCCGACTTTCGGAGCAGGGGGAGTTGATACGA	15.4622	15.422	AdaLead
Ada_349	ACGGAGTAGTCACCAAAGACGACCGCCTCCTCATGATGTACAAAAGTAGAGCCCCCGTGTGGTTTAGAAGGCAGTATATT	14.324	13.9511	AdaLead
Ada_254	TGATCCTGAGGAGATGCGCAGTCTCGTCCTAGGGTGTAGTGTTGTTGATAGCGGAATACGGACACATGGAAAATCCACTG	16.1584	14.1031	AdaLead
Ada_1112	ATCACGTGAAAGGCTTTCTGTCCAAGTCCGCGCCTGTGCGCTTGTTTCGCCTTGAAAGGTTCATTTGCCGTGATAGCAGG	14.813440322875977	14.298710823059082	AdaLead
Ada_242	ACCCGATGCCATATCTGTTGAGCTACCCGGATGTTCTCCGCTACTACTATGCCCTATCGGGTGGGGACGGACTCAAAGGT	16.9775	16.6876	AdaLead
Ada_279	TCCGCTTACATTGGAGTGTCCCGTACCGTCCGGTGCACATCAGGGCGTTCGTGGAACCGTATACTTATGGGCTTGATTCG	14.7293	14.5025	AdaLead
Ada_479	CGAGACCCGAGTAGTGGAAATTTTGCCTACTTTGTAGACTTCTTGTATACGGAATTAGAGTGAACGTTACCCCGAGAGAT	15.0207	14.5108	AdaLead
Ada_818	TCCCCTGGGGTGCGCGGGAGTGTAGTTATCGTGCCTGCTAAATAAAATTGTTGGTCACGAGGCGTTGGGGTTTGCGAGGA	16.1983	15.2182	AdaLead
Ada_1042	TTTTACGGGTTTGATTTGTTTTGCTGGTGGGCATGATGGAAGCCGCTTCGGTAATTGGGTGTTGCTAGTTGTGTAGTTGC	13.69899845123291	13.147150039672852	AdaLead
Ada_486	TAAGAGATTGAAGAGGGTAAGCCACCTCTTGCTATGAAATTCCAGGCTAGATCCTTCTATGTCTATACCGATGGAGGCTG	14.8836	11.8857	AdaLead
Ada_1056	TCGGTGAATGACCTATCGGGGGTACTTGGGAGGACGCGAACATAGGGAACTGGGTTTTCGGTGTGACACCAACGTGTGCC	16.770292282104492	16.50538444519043	AdaLead
Ada_209	CGACTCAGGCCAGCGTCCGCTATACGCGCCTAACCAGTGGCGTCGTCTCGGATATGCATGAGACATCTTATCTCCTTCCG	16.6064	15.3786	AdaLead
Ada_582	CCTTTCTTGTCGTCGTTAGTGCGTTAGGGTTTGTATCACTTATACAGGCGTTCAGGGTCATAGTTTACCGATCCTACATG	13.6981	13.768	AdaLead
Ada_1239	CTACTTAAATAAGTGTTCATCGGATACTGGATTGTTTCAGCGGAATGGGACAATCCTTATCTCTTTGTACGGTAAGGTCA	16.404233932495117	13.326322555541992	AdaLead
Ada_1105	TTGGCTTCTTATGTGAATACGTTCGTTCCTGATGACACCTCGTGCGGGAGGAAACTGAGTATGGCTCCTGGTCTGTGAGT	16.777462005615234	14.748291969299316	AdaLead
Ada_897	TACCTGGCACGTGGTGTTCGGTCTCCGGCCATTGACGCGCCCTGAGTTGCCACCCCGAATTTATCGGTTATCTGGCATGA	16.577	14.1107	AdaLead
Ada_520	ATCCCCGCACTAGAGGCATGGTTCGCGTGCGGAAGGCGAGGGAAGCGGCGACTGTTCGGCGGGGAAAAGATGTCCATAAA	16.6312	15.8991	AdaLead
Ada_944	CCGGTCGGCGTGCTCCTTCGCCGCGTGTCGGACTGATATTGCGGGACATAAACGTGCGTTTGAACTGCATGGGATTCTCG	16.8006	14.7168	AdaLead
Ada_234	CTCCGTTCGTCGGGTTCATGCGCCTGTGCAGATGTCGACCTGGAGTTAACCTGCGTAAGTGCCCGTAAACAATCCGGGTG	14.7011	14.0077	AdaLead
Ada_437	TTGATTTGCGTTGAAGTTCCTAATGCCGCGCTTTCGGGATTTCCGCGGGAATTAAAATTTTTTCCACTTGTATTTCGGAC	17.8296	15.3672	AdaLead
Ada_396	TCGGCATCTCCCTGTCTTCTATATACTGGTATACGGCTTTTTATTTTTTGTCAACCGGTGACGGGTAGTGTACGCGCAGA	17.56	15.9994	AdaLead
Ada_629	TACGGGCGCTATGCCCCGTCATGTATTTTCTCCGTAAATTGGCATCAGTCTCCGAAAACGAATACAGGCGGGGGTAAAAA	16.7708	16.0339	AdaLead
Ada_1180	TAGCTTTACTGATACTAATGCGGACTGGAGGTGCACACAACTGAAACCGCGTCATCGGGTTATATGCAGCCCCCGCAACG	13.366814613342283	13.15274429321289	AdaLead
Ada_689	TAGCGCTTGCATGGGGTCCTCTTGGAGTATAGTCTGATTGGTTAGATCTAGAGGCATGTCGTTGCGCGTGACACCCTTTC	14.0681	14.4837	AdaLead
Ada_1198	GATCGGTACGCGAGAGTAATAAATGGATTCTTGATTCTGCGAGGATTACTGTGAAAGCGCGAGACTCCGAACGATTTTGA	14.474166870117188	14.629480361938477	AdaLead
Ada_1154	TCCTTACTTGTTCTCTACCCATCGTGGACTCGTTCCGTGCGTGTTTCTTTTGGGCCAGAGTCAACTACTCGTAAAGCCGA	15.867975234985352	14.373743057250977	AdaLead
Ada_1209	TCGGTTCGGGGGAACTACTCAAGAACCAAATTGTTTTCCGTGCAAGCACTCAAAAATCCCATTACTCCGCGGAGACAAGA	14.787565231323242	14.676787376403809	AdaLead
Ada_1245	CTTTCTTTGCTTTTTGATTGTTCAGGACGCGCGTAGCGATTTCCATAGATCTTTAGGTAATATAGCCCTGGCCGCTCTGA	13.824389457702637	12.252189636230469	AdaLead
Ada_1027	CACGGAATGGGCCGCAACGGAAACGGAGTCGTTTTGTGTCGGGCTGAGGGAGGCCTAGCAGAACGTTGACAACGCGCTGA	17.68631362915039	15.886009216308594	AdaLead
Ada_679	TGCTCATGCACGGCGTCCTGAGGTAGGGGCATAGTGGAAGTGCGCTCCCATATGCGAATATCGCCGTATAACGTGGGGCG	15.6478	14.504	AdaLead
Ada_698	GGCTGCGTCTGTTGTGGGTTGCCTTCTTCCCTACCCCGTCCGGCGAAACGCTCCGTACCACATGCTTCTTAGTGGATATT	15.3667	14.749	AdaLead
Ada_1077	CCCCATGCTGAGAGCCGCCTCAATTTCCTAGTATTTGGCGCGACAGGTACATCCCGCCGAATATGGTTTCCGGTCGGGCG	15.697806358337402	15.4374	AdaLead
Ada_322	ACGCCGTATAGCCCATTCTCTCACTTTGGCCCAGACACCGATTCTGGCAAGAACGGGGGTGGGTGGACGCCATGGAACGC	15.9436	14.8146	AdaLead
Ada_937	GGCGAAAGCCCGGCTCGGATAGCTTTGCCCTTGCACTACAACATCCAGCATAATCTTTAGTTAGTAGTTCAGGACTATGG	13.3795	12.2954	AdaLead
Ada_713	TTGATTCGACAATTTCTTAACGGGTAACATACAGGGATTTTTGTATTTTGACCGCGTCCTCTTTCAATCGCGAGTCCTGC	16.339	14.4524	AdaLead
Ada_357	TCGCTCGCCCCCTTCGTGCCTCCGTCCGTCTGACTCAGTAGATTGAGACGAAACCGGCGATCTTACTTTGTCTCCGTAGT	15.2666	14.8892	AdaLead
Ada_104	TCGAGGTCTTGCCATAAAACGCGCGTGGCGAGTATTTACTGTGCATTCGGAGGTGCACGGGTTGTTGCAGGAGCATTCGG	17.7448	15.2146	AdaLead
Ada_481	ATTTCTCCGTGACAACTCCGTGCGCATAATGGTGGAATACTTCGGCGCCGGGACTGCCAGGTTAGCCTTTGAAAATTTTT	16.2437	14.7457	AdaLead
Ada_1210	TGGTCCGAGACTTCAGGCAACGGAAGCCCGGTATTTAAGTAGCTGCAATTAGATCAAGATGGCTTGGAGGTCGATATCGG	12.585721015930176	12.819198608398438	AdaLead
Ada_785	CGCTCTTAACGGGTTTTGATACGAGGCGGGCACGGATGACAATGCGTTGTCCGACAGACTCCGGTGTCGTTGATGTGTTG	16.9943	15.2199	AdaLead
Ada_374	ATCGAATGTATGGGTGCTGACTGTATTTTTATTCGCTGCCTTCACACATTTAGCGTAGCAAGGTCGGTTTGAATATATAA	17.8715	15.6887	AdaLead
Ada_1225	TGGTAAAATTTATGTTCCAAGGCAGAAAATGATAAGTGCCCCCGTCCACACGCGTGCTTAGATTTGAATGGACTCCGATA	12.52022647857666	12.467793464660645	AdaLead
Ada_1240	TCGATGAGGCGTAAAAGCATGACGCACATGAGGTGACACAGGTGGTAATTTTTTGAACAATCCTTGTTAAGTTTCGGAAT	12.870254516601562	10.68605613708496	AdaLead
Ada_1119	TATTAGTGAGCCGCGGCGTTCGCTGTGTACTTTGAGAAAGGGCGGAGGCGGTCATGCGAGACGAGAATCGGTTGCTGTGG	16.14047622680664	15.721308708190918	AdaLead
Ada_260	CTTAAAACGCAGGTCGTGCCGCGGGTATTTTCGAGATTTTCGTTTGAGGGCGCGAGTCAGAGGACAGAGGTGTAGAGCGA	17.2821	15.5236	AdaLead
Ada_841	CGTGTGGCGAGGGTGGAAATTGTACACTCCGTTCTGCGGCCCTAACGGGATGCGGAAAGCGCGCGAAAATCATTTGGTGT	17.4138	16.0273	AdaLead
Ada_541	CTAATATAACTCGGAAAATTTTTTCGACAAAATGGATAAAACCGCGGGTGCATTCAAGGGAGGGTCACTCACCCGCCTAT	16.3822	14.8103	AdaLead
Ada_801	TTTGTCATTTTCATATTTCAGGGCGGCACGGTGATTTGCCCGTGACGTCCGGCTATTCCGGGATTAAGACGCCCTGTGCG	16.8329	15.6106	AdaLead
Ada_402	GGCGACGCGCGCGCTATGGATGAGTTTAGACGCCGAGTCTCCAACATAGTGTGACGGGATGCCTCAGAACGGGGGTGGAA	15.7335	14.5223	AdaLead
Ada_1089	GCCGAGGTTTGTGCTATATATTCGTGTTTTCCCGGGGCGCGAAATCTTAGACGACCCGTCCTCCACCACGGCCTGGTCTA	16.094	14.786112785339355	AdaLead
Ada_174	CAGGGTTGCTAGGTTCGCGGTGACCGTCGGTGGTATGCGTCCATTCGTGTGCCAGTTCGCCGCGCTGGGCGGAGAGCCGG	16.4882	14.2658	AdaLead
Ada_1014	GTAAAATCCGCTAATCGACGCGTGGGAGTCCTAAGAACGCGTGACCCAGTATCTGTCATCCGTGACCCTTAGGCATGGAA	15.7265	15.411645889282228	AdaLead
Ada_343	GAAGTACAGTTATCCGGACGTATATGCAACCATACCCGTTCAAAGCGGGAATGTAACTATAGACGAGTTCGTAAACGCTC	16.9756	14.8738	AdaLead
Ada_453	GCGTTCCGTTTTACTGACGCGAGATAAACGTGATGTCAAGGTGTTCTGGATGGTGGCATGATTCGGCACCCTAGCCAGTA	16.2121	15.0827	AdaLead
Ada_1194	TCGCGCGTAACGCGTAGCCTACAATATCGATTATTGTCCGGTGTAGCATGTCGCTTCTGTGTAGGGTAAGAGACAGGCTG	16.38800048828125	14.99781608581543	AdaLead
Ada_1064	GTTGTTTTTGCGCGAACCTCGGAACTGCCAGTTGGGCCAGTACTCGCTTTTGAGCGCAGGCCTTAGCGGACTAAATCGTC	16.18776512145996	15.308650970458984	AdaLead
Ada_1069	CGAAGGAACCGCGTAGTTATACGATCACGGGGAGCAGCTATCAGGGGTAGCGTTTCAGACGGCTTGAGGATATTTCAATA	14.752551078796388	16.165006637573242	AdaLead
Ada_539	GCACCTTCGCATGCCTTGTCTAACGGAGCGCAAACCGGTTACCTGCTCCGTCTCGAACGGGAGTATACGTGGCGGGCCTG	16.3927	15.2247	AdaLead
Ada_729	TGTAGTCCTCGCGCGAATTTCAGCAAAAGTGGGTGTACCAGGGGTCATAGAGTGGAAATATTTCGGACTGTTGTATACGG	16.4285	15.2614	AdaLead
Ada_1000	CACTTTCCCCTTGCCGCGCCGCCCTTTCTAATTGCTCACCCGGTTCCTCACTTGTAAGCCGATCCGAGAGGAAATCACCC	17.940561294555664	16.801931381225586	AdaLead
Ada_448	TTCAACCGGACATGCGTTGGCGCGCCGAAACCGCTACGCTCGCCGCCCGGTGATTAAGGCCTTTGCGTTGTGATTTCGCG	16.7486	15.1126	AdaLead
Ada_534	CGTCCCAGTCGGGGCGTTGCTTTACCGAGGGAGTGGCAAAAGACGGCCTGTCGGTGTCATGGCAAGGAGACCACATGGGG	16.0542	15.7919	AdaLead
Ada_1019	TTCATTGACTCGGGCTAGTTTTAGTTTAATTTCTAATGGGGGTAATTCTGGCCGTCGCTCTTGCCCGGAGGAGCATCAAA	16.599010467529297	15.303845405578612	AdaLead
Ada_71	TTGCCGCCCCGGGGGTTGAGAATTTTTTTGGAGAGAAGTTTTCCAGTATCTCCCGGTTGGGGTATCGCGAGAGTGAAAAG	16.9448	14.9717	AdaLead
Ada_1259	TACGCATAAACTCAAAATGCGCGAAATACATACGCGATACCAAACGGTAGCCGTGGCTTGCCGACGCATCACCAAAGCGA	16.476957321166992	15.446043014526367	AdaLead
Ada_87	ACGTACGTCGTGCGCACCTTATAGGAAACGCTCGGACTGGCCGAAGATAAAACTTTTGTCCTTATTGACGAATCTGATCG	18.7343	15.9037	AdaLead
Ada_986	TGCGGGGCGCGGTAAGCACCCTGCCGCCTTGGGTGTCGCGTCGCCGCCTCGTAAAAACGAGATCTTCATAGATCCGAAAC	16.5556	15.6916	AdaLead
Ada_39	CAAAGGAAAATGCGGAAATCGGCATATATAAACACGCGGGCGGATTGCGAGGGAGTGCCTAAGGTGGGTTTATGGTCTCG	16.9393	15.1764	AdaLead
Ada_130	AAGTTGCTTCGTTGTAGCGCGCGGAAGGGAAATCGTTCGGCCCGATACGGGTGTTTGATCCAGTCGGGCGTTTTTTTTCA	17.6797	15.4792	AdaLead
Ada_444	GAATAATTTTTCAATTTGTCCACGGGCAATTCCAGCGCTCCGAAGGCGCCTGCTAAGGTATAAAGCGGGTCGGAGGAGGC	16.2668	16.0499	AdaLead
Ada_623	GGCTCGGTGGACCCGTTAAAGGGAGAATTTCCGAGCTTAGTGTACTGAAAAGCATTTTCCGAATTTTGAGACTGCCGGGA	16.6622	15.6791	AdaLead
Ada_777	ACGTGAGAAGGGCTAACATCTGTGGCCAGCCACTTTTGCCATTGAGTCTCTTATGTGTCGTCGAACGTGACCGCCTGTGA	16.7375	15.7887	AdaLead
Ada_737	GGTCCATTATTATCGCTCCGCGCAACTCTCTGGTCCGGATTTTATGAGAAGCGCGCCAATGATTTTATGACCACCCCGAG	16.6608	15.8816	AdaLead
Ada_146	CCTTGTAGTGGACGGCGCACAGCTATATAATTTCAGTAGAATCGGACGCGAGGTGGTGAAACGGATCCGCGGTGTAGCAC	16.8113	16.048	AdaLead
fast_200	TATGCAGGCAAGTTTTAGTCTGACCATACGAGTCGGGTGCCGCACCAGCGTGCGAAATGTGCAATCTCTACGATGGATCG	14.60219955444336	13.616822242736816	FastSeqProp
fast_379	CACCGACTCGGTTCAGTTTAGGGATTTCAGCGGGGTGGTCCAACGTGTGAGGAGCCGACTTGTATCCCGCTCAGCCAGCG	14.39536190032959	14.602864265441896	FastSeqProp
fast_124	CGCTCTTTGGAAGTCGTACAGGGAAAATTTTCGAACTCTCTGTACTGAAAAATATATGCGGGACGTTGACAAATCGAGGG	15.5951	14.3044	FastSeqProp
fast_240	TTCAACGGAAAGGCATTTTGTGCAAGTGCGGGACTGGGCACTGGTCTCGCTAATAACGGTTTTTATCCCGTGATAGGAGG	15.312127113342283	14.326009750366213	FastSeqProp
fast_313	ATTGTCACTTTGTAATCTGTGGACCGATCTTGGTGCGGGGCGCATGCTTTAAATTTGATGAGGTTCCCCGTGAGCCTTCG	14.377201080322266	12.974431991577148	FastSeqProp
fast_160	TACTGGCGTGTGAGAATTCGGAACGACACGTGGGCCCGTCTGACTCCAGTCGATCTCCCGGGTTATACGAAAGGGACGGA	16.1026	15.1841	FastSeqProp
fast_398	CCGCGGGTCCTCGTTTAGCGAGGCGTAAAAATGGCACATTTGCTCACACAAACGTACTCTTGACATGCGTTCGATAATTG	15.836832046508787	13.229576110839844	FastSeqProp
fast_161	TTACCGTGGACGTTATATCCTTGGTGGTATGTCCACGACGCGCGATATTATCCACCCGCATCGTCGACGCCGCCGGAGTA	15.6051	13.2602	FastSeqProp
fast_343	TCAGTTTGAGAATAATTTGCGCGGATGAAAGCGGGGAGGGATGCGTCGCTCCATGTAGCGGTCGGTATACCGAGGGTAAA	14.890230178833008	14.30165672302246	FastSeqProp
fast_196	GCGCTTGTTGTGTCATATAGTGAAAGCGCGCCGTTTTATTTCATTTTTTCACATTCCTAATTCAAGTTTTATCCTTACGA	16.9101	13.798	FastSeqProp
fast_249	TGCGAAGTCGTCCTATTGCCGGAAATATCTGCAATCTTTGCATGATATAATGCGCTCCCCGTCTCGCCTCGGTTCGTCGG	14.764711380004885	12.715718269348145	FastSeqProp
fast_75	CAGTAGGACACGGAGTAATTGTACTGTCCAGATCACAATACACGGTTGTTCTATAACACAGGGTTCGAAACGCAAAGCAG	16.2142	13.3912	FastSeqProp
fast_271	GGATAATTTTCGCTATCGTCCCGCGCTTACTTAGAGTGTCGAAGCGCTGGAAATGAGGTTCCGGTAATCCGCGCAATGGA	16.138763427734375	14.812124252319336	FastSeqProp
fast_224	ATGATGACCCGGGTTTTTTTTACGATATAAACGGGACATTGTGCATTATCTACCCGCCCGGGTACGGCGTGAGCGGGAGT	17.0549	14.058635711669922	FastSeqProp
fast_297	GAGAGTTGAGATTTTTTCGCGCAACGTGGGGTTTATTGCGAAGCGCTTGATTTAAAAATTCTACTACCATAACTTTGGCC	15.254837989807127	12.906221389770508	FastSeqProp
fast_23	GGCCGCTTTATGTCCTATAGTACGGGGACGGTGTTTAGGGTGGGAAGCGGTACGGGTGTCTTAGTGACAGAAACCGAGTG	17.1249	15.6816	FastSeqProp
fast_171	GGGTCAATCTATTTAAGTCGACAGACCGCCGACGGGCGGTCTACCGTTGGAAATTCAGACACGGGAATGAGCGCGGTAGA	16.1644	15.6402	FastSeqProp
fast_209	TTGCTCAGACGGAAGACCTCGAGCCATATGATTTAAGTCAGCGCGAAGTTTTTTCGACGAGCCTTGAGCACATGCTGAGG	15.130455017089844	13.539464950561523	FastSeqProp
fast_88	CTGGAAATTTGCACGGAATAAGCGTTTCACTATACCCTTCCATGTGCGGGTGCCGAGTCAACCAGTGTTTCGCGCGGTAC	15.658	13.9152	FastSeqProp
fast_338	TCGGTTAACTGATCATCCGACGAGTGTATGGGATGCTCCCTGCACCTGTCCCGGAACGGTGTCTGGATAAATCTCGCTCG	14.463245391845703	13.411837577819824	FastSeqProp
fast_292	ATGAGACCGTCCGTCTCTCGGCCCCATACGTTAGAACGGGCCGCCTTCGCCATAAGGTAGGGGCTTTAACGACCTTCGGA	14.187725067138672	14.335880279541016	FastSeqProp
fast_100	GGAGGCGGATAGCTTGGCAGCTCTTCCGCCGCGCCTGTAAACCCCGTAAAAGGGTATATTAGTGTGATCGGGCTGTACGT	15.7447	15.2606	FastSeqProp
fast_156	GGATGTTGGATTTAGGGACATTTGACGGAGTTCGCATGTGGAGGGCGGGCTATGTCAGGCGAGGGGGTGTGGGCTCGCCC	14.9051	14.9482	FastSeqProp
fast_394	CTATTGGTCTCGTGTGACCCTGTGGGTGTTGGGGTTGTTCGCTAGGGCCTCAAGGATCGATCCCTGAACTGTCGATTGTA	13.509943962097168	12.983787536621094	FastSeqProp
fast_83	GCTCGCTTCACTAAAATTTCCTAGCTTAGGCTGTTCCGGAACCTAGATGATGTCCGGAACGGGGGGTAGACTTGTTAAGA	14.2938	13.2463	FastSeqProp
fast_155	ATGTAAGACGGACTAAGAGCTTCGGCTAGACAGGCGTTCCCCTGAGACCCTCGTGTTCGATGGATAATGGCCAACGCTGC	16.3697	13.5508	FastSeqProp
fast_19	CTCGACTGACATGTCCCGTGCCCTCACTCTCGTGCGGAGCTTTGTTAATCAAAGCGGGTCATACTCCGTGACAGCTTCCA	14.7638	14.135	FastSeqProp
fast_107	GGAAGTTATCGTATCTTGTTTGGTGTCGGCTTTATCCGGTAAGCCGGGCGGAACTACCTCGCATAGACTTGACGCGATCG	16.0402	14.474	FastSeqProp
fast_260	CGACTTTGTTGAAATGCGGCGTCTCTTGATAGCGCGCCTGGTTGCGGATCGCAAAGAAGAGACACAGCGATGGTCGATCG	15.781290054321287	13.785629272460938	FastSeqProp
fast_29	CCGGGGAGTCGAGGGCAAAATTTTAGATTGTTTAACCACGCTTGGACGGGTGGCGGATTCCGGGGCGGCCTGGAAAGGAC	16.8832	14.8133	FastSeqProp
fast_386	TCTGGATGTGTAAGGCGCTCAAATTACACCGATCTAGTTCTCCTCTTGACGGCCCACTTCACGGCTGTGTGCATGGGGCG	14.045794486999512	12.93087100982666	FastSeqProp
fast_390	GACCTCGCCTCTGTGCGGATCTACCACCCGTCCGCGTGTCTGTTACAGAGCCACCAAAACGAGGAAAGGCACTCTGGCGT	15.799033164978027	14.019020080566406	FastSeqProp
fast_373	CACGAGCCGGTTGCCGGGAGTGTCGGATGCGAGCCGTCTTATAATAATTTGTGGGAAGGAGGCGTTGTCGTTTGCGAGAA	16.09124755859375	14.694584846496582	FastSeqProp
fast_244	AGGGGTTGTTCGGTTCGAGGTAACGGCCGGTGCTATGCTTCAATGTCGGAGCTAGTTCGCCGCGGTACGTTGGCGTAGTC	14.193219184875488	12.609745025634766	FastSeqProp
fast_320	CTTGCGCTGCCACGATATACGCCGTGCGGAACTTGGAAACCGAACAGCAATATACTTTTCAACCAGCCGGGTAATATTGA	18.29274177551269	15.826897621154783	FastSeqProp
fast_24	TGCTGCGGAATTCCAAACGTCCGAACGAATCACGTATTGCGTGACTTCGATAAACGCTTTTCGGTGCATCCTCTACGCGT	16.7091	15.7164	FastSeqProp
fast_66	GGTCACCGTTCAACCTGGCGGCCCATGTGCTGGGTTTCCCACGCACGAAATTACTTCGTGGGAGACTCGACTTCGGGTTC	15.8309	14.6075	FastSeqProp
fast_311	TCGCCGCACCACATCCTGTACGGATAATTCAGGGTGTCCGTACATTGCCGGTTCCGAGCGTGTGTCCTCGGGCGGCTCCA	15.603339195251465	14.521846771240234	FastSeqProp
fast_242	ATCTCAATAGGGCGTCGTGCCGCGTACATTTATGATATCACGTTTATGGATAGTTGGCGGCCGCGGCCATCCCTGTCCGT	14.739325523376465	12.66661548614502	FastSeqProp
fast_401	CGTGAACTTTTAGGCACACGCCTCCCCTTTCGGCCGTATACCCAACGATATAGAGGGATGCGGGCGAGACACTGAGTAAA	14.09445858001709	14.799951553344728	FastSeqProp
fast_296	AAAACGTATAGTATAAAAGCTGTACTTATACCGAACGATAGCGCGTTCGCCCACACTGTGCGGTACCACGCCCCTGTGGA	14.473042488098145	13.754899978637695	FastSeqProp
fast_130	CGGCACCTTAGAAGCGTTTACGGTATTGATCTCGGTCCCGGCTCTCCGTCGGGTCCTGTAGATATTTGAAATTCCTGGCG	16.0319	14.5398	FastSeqProp
fast_7	GAAAGGAGAGTAAAAAAATAACTATGGCTCCACACGCGGCGGGCTGGACACCGCGCGGAAAATGGGGGGTAGTGGCCACT	17.163	14.4058	FastSeqProp
fast_408	GGTGCTCGGGCGGAGAATATTCTAACGGCCTGCCTTCAGTCTCCACACTCGCGTAAGTGGTGGTCCACGCTCACTAGTGT	16.072118759155273	13.287930488586426	FastSeqProp
fast_64	ATACCATATCGGCACCGGGCAACGCGTGACCCGGTCAATGCTTCTGGTACGACGCAAGGCGGGCGGGCGCAAGGGAGCGT	18.1729	16.5005	FastSeqProp
fast_336	GTATTATCCCGTTGGGCACCTATTCGGAACTTTGGATAACTCCCCGCATCGACCGCCCTGAGGGGGGTCGTGAAGTTATC	13.987406730651855	14.2735	FastSeqProp
fast_17	TCGGACACGATTCTTACCTTTTTGTGGTCGACGGCACTAGTCGCTCGCGGGGGACTCGTGGGCACGGCGTCGCAAGTGCG	16.9021	15.3469	FastSeqProp
fast_344	GTATTTCGAGTCGGCGAAGTTTTGTGGAATACACGCGACTTCTGGCCGCATGGTCGTGTTGGGAGCCACTTTACGTGTGA	15.240615844726562	13.538496017456056	FastSeqProp
fast_58	CAAAAAATCAAGCGCGAGTAGTTTATCCGGGAGCCTCGGTGAGAAACAACAACCAGCTCTATGTTGCCGCATGAGGCAGG	15.5868	14.1545	FastSeqProp
fast_269	TACAAGGAATAATTCGTTTAACGGCACAACAATGATTGAAAATTGCCGTATCATCCCTCGTATGGTAAGCGGGTCAAAAA	15.686362266540527	13.57839012145996	FastSeqProp
fast_6	GCCTATAGCGCTTGGCGGAGCGAGTCAGTGTAATAAAGCCTAATGCCGCGCTGTATTCCGTGCTCCGCAACGTGTCTTTT	15.5407	14.0792	FastSeqProp
fast_407	TCAAGCCGATAAACGGGGCCTCGCCCGATTGGAAAATGGATAGCGTTTTTACGTAGTCCCCCGCAACATAGATCCAATCT	15.04464626312256	14.259546279907228	FastSeqProp
fast_250	GGGATCATGTATCCACCGAAGAAGAGGCCGGGATTTACGTACCTGCAGGTGTACCATGCGGGCGTTGATGGCGATATCGA	13.680954933166504	12.759268760681152	FastSeqProp
fast_225	TATGTCGCTTCCAGGCAGATTTCGAAAAAAAGGTACGCGGGGGGGGGTTATCTTGACAGGTGGGGCTTGCGGCTTTTGCT	13.862242698669434	13.240436553955078	FastSeqProp
fast_11	CGCTGGCTAGGGCTATATATCGTCGACGAGCCGCGTGCTAAAATTTGAGTGGACGGTCGCCTCTCGGGGGCTTTTTGGAC	16.6887	15.4583	FastSeqProp
fast_174	CGCCGCGTGCAGGTACCTCGTTAGCTCTGGCCCTCAAGGTCTGTCCTTGGCTGAGAGAACCCTCCGCGTCCCACTAGTTG	14.443	13.4511	FastSeqProp
fast_262	CACAATAAACACATCCGCCTGCCCGAATTCGCAACATTCTAGATTGAGGGCCGGTCTCCGTGGGTAACGGTCCACGGTAG	15.437652587890623	13.92289924621582	FastSeqProp
fast_150	GAATTGCAGACCGTTCTCAGAAATCCTAGGGCGGACCACCACGCGTGCTAATTTCAAGATAGACCGTCAGTCTGTCGCGC	15.1382	13.0079	FastSeqProp
fast_139	GGGTGCCGCGTTTCTTAGTTTCCGACATTACGGATCGCCCCTGAGATTCTATTCGCTCTACTTATTACGGATTTGCCCTC	14.9043	15.2107	FastSeqProp
fast_199	ACATGCGAATATGGAACGCGCACTACATTCTTTCCGGAATGGCATGGGTCTCCGTATTCTTCGCGTTCTAGAAAGCCGGA	15.6513	15.7034	FastSeqProp
fast_129	AGTCAGTATTGTCCGAGATAATCGTTTTATCCAGTTGACGCGCGTCCGACACGTGCTTGCGGCCAACCCAGGCGGGTCTT	16.7707	14.9098	FastSeqProp
fast_350	GAGCGCTACTCGAGAGTAGTCCGTGGGTGTTTCATTCCTCCCGCTTTTCTGCGAGTCGGCCACACAGTGGAGAATAGTCA	15.394371032714844	13.778358459472656	FastSeqProp
fast_324	GCGTAGTGTATACGGGTATTGACCCTAATGCGTTGGTACGGCCGCCATTCAGACAAATTTAGCATTGGTTACCTCGCGGA	15.975471496582031	14.72770881652832	FastSeqProp
fast_194	GACAAGGTTTACGGGTTAAAATTTGTTTAATTTCGCGCACAGGAAGGAGTTTTTTCATTCTGTCAGTACGCCGTGAACAC	16.5222	15.6522	FastSeqProp
fast_328	GACTCGGTAATGTTCGGGAAAAATGTGAGCGACGTTAACCATGGCCCGATCATGAGCGAAGTTTGCAACTGCGACTTTCT	15.65063762664795	13.765341758728027	FastSeqProp
fast_144	TTGCGCAGTTAAGAGCGCGACGCACGGAGTACATCTATGCCGTGCACGTATACTCTCAAGGCCCGGTGCTACACAAAATG	13.7344	13.6865	FastSeqProp
fast_272	TGAAAGTGTGAGTGAAAGTGGCGTATTTCGCTAGTAGAAGCCCCGTTTGTGGATAGCGTCAGTGCGTCGCGGGCGGGTAA	14.493131637573242	12.491331100463867	FastSeqProp
fast_31	GCGGTTTCTCGTGATGCTAGACGAGACGCAAGTTGTTTCGCGCCTAGGCATAAGTTTCCTGTCCGTGAGTCCCTCACGTC	15.4247	14.6725	FastSeqProp
fast_190	TCCCGTGACCGGTTACGAGTAGTCCGAAAGTTTGCACCTGAGGTACCGTGTCGTACTATGAGCGGGCGGTGGGTTTGGCC	14.439	14.5637	FastSeqProp
fast_352	TCGCTTTGACATTTTCTGTCGGGTTAACATACAGGGATTTTTCTAATTTGCAAACGTCCTTTATCCAACGGGAGTGCTGC	14.555490493774414	12.91118335723877	FastSeqProp
fast_236	GCTTAGACTCGTCGAAGAACAGGTATCGGAACGCGCGAGGCCCCTGAGGTGCGAGTGACGGTGTTTAGCGAGTTGGTCGG	15.884960174560549	14.370110511779783	FastSeqProp
fast_193	CCTGGGGAAAACTCAATTTAAAAGCGGGTTACCGGCTTTTGCCTGACGGATCCATTGGGTCCGGTCAATATTTGGCACCG	17.6519	15.8995	FastSeqProp
fast_385	TCCTTTTCGCGTGGCGGCGTATGCGCGTCTAGCTTTAGACTGTTGTATCACCGTCAAGATACCGGGAAACCTACCTTCCA	14.744706153869627	14.561619758605955	FastSeqProp
fast_89	TGGGCCCGGATCTTCTTTGACGTTGACATCGTGCTACGTACCGTGGTTCGCGTTTATTGGTGTAAGGTTGCAAGTCGGGG	14.1039	13.2794	FastSeqProp
fast_307	TCAAAGTTTCCGGCGGGAATCCCACATGTTCGTTTAAAGGTCTCGCCTTTCTCCTTATATTTATTTGCCGCTGCCCGCTG	14.392515182495115	13.835701942443848	FastSeqProp
fast_186	GCGCGTCGACCATGTTGACACCCCTCTTCCCTCAGCCCACGGTCGCCATCACCAGCGCCCTTGCTCCATATACCCCCAGA	14.2245	13.8001	FastSeqProp
fast_253	TTAGGCGGCCAAATAGGAATTATCACGTGGGAGCTTCGTGGTCATAGGTTGTACAGCTTTGGATGGTGAGGCCGGCGACG	15.279863357543944	13.679101943969728	FastSeqProp
fast_67	CCACATTGGTCCGTAATGCTGCCGTAGGTCTATCTCCGATCAGGCTTCCGGGTTGCGGTGCGCATTGTTCCGCTTGATAA	14.1844	13.345	FastSeqProp
fast_261	TCACTCGCTCTTTTGCGGAAGCGAATGGTCTCGGACTGTGATTCAGGCCTAGGTGGTACCAGTGGGGCTCAGAGCCGGCG	15.161608695983888	14.511505126953123	FastSeqProp
fast_358	AGGGCGGAGGTACATTGAGTTTTTCCGTGCCTACCCATTTAAAAGGATATCTGCTACTCAACGGACGGCGCCGGCGTTTT	15.730247497558594	13.531538009643556	FastSeqProp
fast_284	CTTGAGTGTCAGAGGACTGCTTGGATTTCTATGTGGAGCCCGGCCACACGCCGCGCCTAACGTTGGGTTTGAATATTTAA	14.281253814697266	13.016554832458496	FastSeqProp
fast_137	CAGCGCTGCCATGCGGTCCTCATAGCGTATTTGGCGGTGGGGTAGAGCGAGGCGCATGTGGCTTAGTGTGACTCCGCACG	14.5605	14.0496	FastSeqProp
fast_158	GCGATATACGGGGAGGTGCCGGCCGTTCACTGGTGGTCTAGTGGTGCATCTCCCGTGGAGGGGGCTTCGGTCCGTGACGG	17.8401	15.7322	FastSeqProp
fast_335	TACGGGTGTTATATCGCCGCTTTGATATTTTCATTTACGTGGCATCTTTCTTTTTTACCGAAAAATCGCTGGCCTGACCA	16.0283	14.249554634094238	FastSeqProp
fast_81	CAGCAATGCGGATACAATTGCCTAAGCGAGGACCCGATAACTGAGACCGCGTCGTCGGGTAATGTGGGACGTTCTCACCA	16.8971	13.8288	FastSeqProp
fast_378	GGTATCTCGGCAGTGGAGCGACCCCGCTTCGGAAATTGGGTCATAGCCGAACAGGGATGCTCCCCAAAATCTTTCAACAG	15.644336700439451	15.171924591064451	FastSeqProp
fast_73	CTCAGGTACCTTGTTCGCGCACCGTTTCGGGCCACGCGTACCGCTGGTCGCGCCAGAGGGGGTAGCCGGGTCTTCGGCTA	17.6789	15.3625	FastSeqProp
fast_181	CGTACATGATTGAATGCGTTCTAGGAACTCGCAAAGTAGCGTTTATAGGCCGTGCTGTAGCCTCCCCTCGGCTGGACGTG	14.8182	13.4534	FastSeqProp
fast_10	AGTCCGTCCTCATGAAAAAACGGGCGGAGTATACACGTGGTTATGACCGATTGGTGAGCGAGCTATGGGTTCCCCCGGTG	15.9501	14.2528	FastSeqProp
fast_37	TTCTTGGCCGAATTTATATTCACTCGGGGTGTCCGTCTGAGCTTCGAAATTCGGCGTGTAGACGGCGCAGTCTCTGTATG	16.3097	14.7125	FastSeqProp
fast_42	CCTAGGTGCGATGCGGCGAATAGACCAGAGCCGGCCTCGGATTCGGCTCGCTGGAGCTATTTCCGACAGTCACGTACCGA	16.5855	15.0583	FastSeqProp
fast_3	CCACTTTCCGTACCGGACAAATCGACAGGAGGGCCACCCCGTGTCGCAGTGTCCTTATTTGGCGGATAACCCGTGCAGGC	14.8073	14.5848	FastSeqProp
fast_94	GGGCGCGCTACGAGGCGTTTGAAATATCTGGGACGCCCCGCCCCGGGCGCATCCCCCGGCAACTGATTTACGGCACGACA	18.3173	16.7817	FastSeqProp
fast_146	ACCGGCGCAGCCGATGTTGCCGGGGGGGCCGGGCGTGAGCTAATTCCTTAAGCTTCCTAAGCCGTATAAACCGTCTCCCG	15.9596	13.1887	FastSeqProp
fast_302	GGTCAGTATGCCGCGGCCACTTCACTTTGTGTCCCGATAGTTTTGGTCCTATCGGGGCCGTTCACATTTCCGATTAGTTT	15.68482494354248	15.822295188903809	FastSeqProp
fast_314	ATCCCTGTATCTGTGGTGTGTCGTGCGGGCGCCCGGTTAGGGCAAAAATCAATGACCGATGGCCACGGGATTTTGGTGGA	15.029071807861328	13.592405319213867	FastSeqProp
fast_165	GCGGTTGAAGGTAGCGAGACAAGGAAAAATTTTCAGTTCATCTACGCTTTGATTGCCCCGAGCTCTTTGCGGTCCAACGG	16.9716	15.2894	FastSeqProp
fast_315	TTCAGGTCCTTTATCCATAAGTAGAATATTTTCTAATGATACTAAACCCCGGCCGCGTGGACGGCAGCAGTACTCGCTAG	13.614225387573242	12.305317878723145	FastSeqProp
fast_392	CTGGATTACTCCGCTTTGACGGGCTAAATTCGCGGCGTGCCTAGATACTCGGGCTGACTCGGGTAAGGTGGTCACGCACT	17.444984436035156	15.92148494720459	FastSeqProp
fast_254	TAATGAGTGCTCGGACGCATCAAGAACCCGCGCTATGGCTTTACTAAACTCGGTGGCTATATATTTCGTCTTTTTCTTCG	16.09058380126953	13.838394165039062	FastSeqProp
fast_223	TATACTTTCATTGACGCGTTGCTGCTGCCACGTGGTAGGCTAACTTCGCCCGAGGACGTTGATCATAAATGTATCGGGGA	15.933161735534668	13.330977439880373	FastSeqProp
fast_210	TGTTTCCGCAGATTGATGGGAGCAGGGTCACACGGGGGTGTTTTAATCCGCCATCTAGGGAAGTTCACACGGGTTCACAG	14.728228569030762	14.23532772064209	FastSeqProp
fast_346	GCTCCTAGTTGTAATCGCTGGGTATACGAGACCGAGGGCAATGGGCTCTCTCGGTTGCGTTATTGCGTTCTTATGTCATT	14.10144329071045	12.763376235961914	FastSeqProp
fast_362	CTGTGAGGTGCCACTGTATTGATTACCCTATATAATATCATCCGGAAATCCCACACAAGGGTGTATTCTCCCTTTTTACG	15.00973129272461	13.541970252990724	FastSeqProp
fast_141	GAGACCCGTGAGGTAAATCTGGACCTCCGGCGCTTGGGTGGACGGCGTCTCGTGACTGACCAGTCCTCGGGTTGAAATTG	15.7293	15.2159	FastSeqProp
fast_245	TACATCCTGACCTCGCCGCAAACGTAATTCTTGGTCTGAGACATTTGCCGCCTAGTGCCTACGCCCTGAGCGTATGTGCG	14.20016384124756	13.81082534790039	FastSeqProp
fast_153	ATGCGCTACACGCACTTCACTTGACATTAGTGTCTCAGATTTTCTTGAATTTTCGGTCCTCCGTCCGCGCGATGCGTCGA	15.8601	13.645	FastSeqProp
fast_47	CGCTTAATCTCTTATTGAGTACAGGCCGGGTGCTCTCACGTGGGGGGTTACCTATCATAAAATATTTGCCCACGGAATTC	15.7765	14.165	FastSeqProp
fast_143	TCAACAAGCCCCCGGCTCGAGAAACGTGGTACGCCTACACAGTTGAGCGCGTATGTGGAGAGCCCCGCCTAGCCCACGCG	15.2722	13.137	FastSeqProp
fast_28	TCGGGTCACGGTCTCGCATCGCTTCGCCCTTACTTTTTGGACGTCAGACATGGGTGGTCCTAAACGGACGTGTTCAAAGT	16.074	13.8223	FastSeqProp
fast_264	GTTGATCGTGGCCCAATCTGGGAGCGCTGCTGTCCGGGCAAAACCCTTCGCCGGGCGGTGGTCTTGCGAAAATCACGTCG	17.00607681274414	14.205735206604004	FastSeqProp
fast_145	TATGCGTCACGCCGTTTCATCATTTCCGGCGGATCCGGCCCCCGGCACGGTGGAGAAATAGACAGGAGGGGTGGAGGTTA	16.153	15.4711	FastSeqProp
fast_60	GGTGTTGAAGGGGGGACATGTGGTGCCGCCCCAGGGGGGCAAAATACATGAGTGGGATCCGGCCGAGAAAAACAGCCAGT	16.6861	16.5115	FastSeqProp
fast_278	CGATGTCGGTCAAACCCGCGTGTACGAGACCATACGAGGAGGGAACGGGGAACTAACTGTAACGAAAGTCGGACCCGACC	15.319360733032228	15.454570770263672	FastSeqProp
fast_316	GGCCTCGTTACGGGGGCAACTTTCACGGGGATGTCGCAGAAAAAGGAGGGACGGCGTCATCGCAAGAAGGGGAATAGAGA	15.935805320739746	14.290562629699709	FastSeqProp
fast_318	TTAATTCAATTCGGCAAGTTTTTCCGGTCACCCGCAGACCACCTCGTGTGCATGTAAGCTCGGTTACCCCACCGGCTTAG	17.975950241088867	15.165085792541504	FastSeqProp
fast_131	TGAGGCCGGTCCGTGGCAACGGAGTATTTTAACCGTGTTTGCCAAGGGGCCTGAATTTTTATCTCTCCGAATGCCCCGGT	15.9975	15.6551	FastSeqProp
fast_90	CGGGCGCTAGGGACCCGCTCGAGGGAAACGCGATGTCAGGCGGTTTTTGATTTTGGCGGGTCTGGGCGTGATAGCCCGTT	18.0291	15.7355	FastSeqProp
fast_71	GCGTGCCGTTAGTGCTTGTGTACTTTCTTTTGGTTTACGCGATGCGGACGGTGTGGGCGCCGTAAATTTTTCCCCGGAAT	15.7151	15.1118	FastSeqProp
fast_330	ATCTGACACGACGATCACGACAGAACAAGGCTTTCGCTAATAGCGGTGTGAACTCGGATGGCAATCTGACAACCGGAAGG	16.768943786621094	16.002565383911133	FastSeqProp
fast_56	CTCGGTTTTGGGGTTGCCGCGGACCTGAAAAACCGTGCAAAGCGGGTTAGATGAATTTTCCGTGACATGGTATATCGGAA	17.1087	16.2315	FastSeqProp
fast_290	GACGTGGCTAGCCCTCGGGATGTATTCGGAGGCCGACGATAGTACAAGTTGTGTTTGGATGACTCTGTACCTCGACGCGA	14.678624153137209	13.033184051513672	FastSeqProp
fast_9	TATGATGTTTTCTTGCGAGGGTTACGGAGTAAGAGTCGAGTGGAGGGCGGACGGCACGGACCGTAATTGGTCTTGTCGTC	15.2634	14.4508	FastSeqProp
fast_127	TGTCAAACGAGGCTTAGCAGGCGCGTCCCTTCCGGAAACAGCTTACTTTCTAAAGAAAATCCGTGATCTCAATCAAGCGG	14.6551	13.5181	FastSeqProp
fast_18	GTCTTTAAATCCTCGCAACATACGCAAGATTCGCTCGGGGAAATTTCGAGGAAACTCTTTCATGTTGCGTGCGCTCCGTG	15.3246	13.1819	FastSeqProp
fast_326	TTTGTCTCGTCGGCGATAAAGCGACAGGGAGAATCTCGCCTATTTACGTGCTCAGGGTCATAGCACTCCGGCCGTAATAT	14.592833518981934	12.540298461914062	FastSeqProp
fast_376	CCTTAAGGTATCATTTACCCGCCGTGGAGTTCGCGCGCGCTTGTTTCTTTTCCGCAGCATCCAACTACTCGGTATCTTGT	15.398143768310549	14.90649127960205	FastSeqProp
fast_72	CTTGCGCGCGGAGCTAGAGCCATGTTATCTCCCATGTCGGTCACCCGTCTTTGCGTATATGTTGCGGAAGAGTTAGTCCC	16.5779	14.8214	FastSeqProp
fast_138	GTTCCGTGGAATTTTTCACAGGGCGCCACGGTGTTATCCACCCGTTACTGGAGAGCGGATTCCGCTTACTACCATTGAAA	16.1277	14.801	FastSeqProp
fast_251	CGAAGGTGCTCGGCACCTGATGTACTTGTCAGTGAAGCGGGGTATCACCAGTCCTCGCTGAAAACTATCTCCGCATTACG	15.146927833557127	14.181092262268066	FastSeqProp
fast_2	CGCATATAGGAGGTGCGCTTTGGCATACACGGAAAACGGATTAAAAAATTTTCTTAAGTATCGTAAACAGAATTGCTGTA	16.8494	13.9932	FastSeqProp
fast_319	GTCGCTCTCAAAACCGTGCGTGCGGTGCTCTGGGAAAGCGTCGCACGTCTGAAATGACTCCTTGTGATTTCATCGGGTTC	17.400442123413086	16.3019	FastSeqProp
fast_147	CTTTCTCTGTTCGCGTTCCTCGAAGTACGGCTCGGGGTCGGTAACGAGTCGCGCCCGAATAATGCCATAATACCGCCTAG	16.4175	14.2155	FastSeqProp
fast_372	CACCATAAATAACTGATCTTCCGAACCCAATTTGGTTCAGCGGCTTTGGGCAAAACTTCCGTTTTCACACCCACGCGTCA	14.802447319030762	12.791176795959473	FastSeqProp
fast_91	ATTTAGGATGTGCGTCGTGTCCCGCGTCGCTTTCGGTCCGCTTCCGGATGCCCGGGGTTTGACGGGTCAAAGAGTTTCCG	17.5847	16.0733	FastSeqProp
fast_215	ATCTTTCGTGCGACATATGTTTCTTGTCAACGCGCGGCACCGGGGGGCCGCTGCTGTGAATGCTGCACGCTCACAGAGCA	16.18170738220215	13.53728199005127	FastSeqProp
fast_1	CCGGCTTGCACTTAAATTCAACTTAAACTTTTATCGGGGGTTTCTAGCTGCTCGCCTAGCGTGGGCTATCTCGCGGCGTC	15.4463	13.9006	FastSeqProp
fast_345	TGATGAGTTCGGACCGTAGGCTTTTTGGGCCTAGCGGTACAGACCTCGCGTTTACAACAACCACAGTGTTGCTAGGGGAG	13.457430839538574	13.473052024841309	FastSeqProp
fast_405	ATGCACGGGGATCGCGAATGGGGAGGCGCAAATGGGCCATTTTTAGAAATTAAAAAGTACACAGTTGCCATTAAACGCTA	14.860435485839844	14.129046440124512	FastSeqProp
fast_20	GATACTTCTTGCCAGATAATGAGGGTAACTGGGCAGAAGCCTGGATAGGGTACTCCGGTGGGGCCCTCAGGAGCAATCGG	16.5652	14.8445	FastSeqProp
fast_76	ATGTGAATTTACCCGTTATTAGTACAAAATGACCTAGGCTCACGCCGCAGCATATCCGATTGCGACGTCTCGCTCTGACG	15.8624	14.5586	FastSeqProp
fast_256	CTTGAACCGGCGTGTTCAGGTCAAGGGGGCGAATTACGCCCAGAGTAGTTGAGGTTCGCGGAGCGTTAACCGAGACCGTG	15.327588081359863	14.429394721984863	FastSeqProp
fast_159	ACTACCATTGGAAGTTTCGGGCTAAATCTTTATCGCCGGGTGTTCCGGTTGGAGGGTTTTTCGCCAGTCCATAGTCCGTT	15.6866	14.3441	FastSeqProp
fast_119	CGCACGGACTCGCCCTCCCGCTTGGTACACTACCGTTATTTTATCTACGTGCTCGGTACGCTTCGCACTTTGTCTGGAGA	15.9707	13.5544	FastSeqProp
fast_117	CACAGGACGCGTTCCCACAGAACATGGGTAGTCGGGTGCCGGGCTTAGCGAAGTCTAGCAAAACCCGAACCCCGCTACGT	16.0805	15.5063	FastSeqProp
fast_79	TTACGAACCGCGCTATATATGAGGACGATGGCAGGTGTTTTTCGGAGTGTGCACCCGTAGTGCGGAACAATACGTAGGGA	15.2866	14.5065	FastSeqProp
fast_123	AGCTAAAACTACGGTCAGAAGGGAGAAAATGCTGCCCGCTGCCGGGTAAAGGCGTGTGCGGATGTCATTCGAGGAAGAAC	17.1077	14.7329	FastSeqProp
fast_84	GCGAGGCGCGACGGGTGCTCTAGAGCGCCCCGGGGATTAAGAAATAAAATTCAAAAGCGGACGATGCTCCCTGGCCTTAA	16.9571	15.3197	FastSeqProp
fast_226	CTTTACCGGGTCGCGTTGTTGGGCTTTTGGGCCGACTGGAACCCGCTTGAAGAATCGCACGCAGCTGGTCGTGCAGATGC	16.676517486572266	14.499588012695312	FastSeqProp
fast_93	GGTTTACCCGATAGGGATTGAAAGCTCGCTGTGCCGGGACATTATCGGGAGGGGGCGAGTCACGAGAATGTTTCTCAGCG	17.532	16.0783	FastSeqProp
fast_332	GGAGACATGCCCATTTCTAGCACTGCGCTCGGTGAAGAGTTGCCCACGGCACCGTGTCGAGACCAGAAACTGTGTGGGAT	15.764622688293455	14.34880256652832	FastSeqProp
fast_383	TTTTTAGGGCACGAAGGATATCCCAGATTTTCGAAGGACGTGGATGTCCCATCCCTAGTACGCGGCCGGGCTTTTGGTGC	14.906783103942873	13.14334487915039	FastSeqProp
fast_312	GGTTTTAACACCGGGTTATTTTGTAGTCGGTGCGAAGTACGTTGTCGATGGATCGCGCTGCGACCGCTATATTAGATGCT	15.353314399719238	13.86206340789795	FastSeqProp
fast_78	CGCGACTCTTGTCGCACGCGACATTGGTGAAGTCTAATGAGTTATGTTTTCGGGGCGATTATCCCCCAAAGTCCACGGAC	14.9973	13.7195	FastSeqProp
fast_111	GCTATTGGTTGTCGGTTGTACATTTCAGTAAGTTAACAGCACAAAGACGCGGGGTCACCACACGTGCTCGTCCGAAAGGG	15.148	13.158	FastSeqProp
fast_48	ATGCGCTGGCCTCGTTTTTTACCTGGAGGGAGGTGCGGGGCCTACCAGATGTTCACTCGGACCGCCACGTCAGAAAAGCG	16.7231	15.1513	FastSeqProp
fast_115	GACCGAACTTTCTCCATCTGTTTTTGCCTTGTTTGGAAAATCATCGTAAGGTACCTGTGCGGTGTTGCATAGTGATCGTC	13.2062	12.6962	FastSeqProp
fast_306	CCTTCCTCGAGGAAAAGCAATCCGACAAATGCGCTATTTTTGCGCTGCTGGCCTTCTGAGTTAAAAAATCGAAGGTTATT	15.041547775268556	13.424429893493652	FastSeqProp
fast_309	AGAAACTGATGCTGCTACAGGTCTGGGTGTGCATCTGATTTTAAGCATAATTGTGGTGTTATGGTGGTCCTAATTCCGGA	14.617552757263184	14.10722827911377	FastSeqProp
fast_22	GTCGGATGGCTCTTATCAGGGCAGAGTCACTGCACCGGGCTTGGGTACTAACGCGTGTTTGCGGCTTTTCACTCCACTGA	15.045	14.1195	FastSeqProp
fast_237	TCGTGGGGATTACCGTCGGGTCCCAGCTAAAAGAGTTCCGTGGAAGATTTCCGGCGGTCGATATAGGTCTCCCCGGAAGC	14.875653266906738	13.921462059020996	FastSeqProp
fast_69	AGGAAATTGTCACCACAAACGGTCGCCTCTTCATAACGTGCCGAACGCGAAGCTGTCTCTGCTTTTTAAGGTCCTCCCCT	17.6579	15.6138	FastSeqProp
fast_164	ATTGGGGTAACGTACTTTGAGGAGTCCGGCCGGGTGAACGAAGTTAATATTTAAATGTTTCTGTATTCGTTTCGGCCCGG	16.1491	14.7086	FastSeqProp
fast_382	GCCAAGGCTTAAATGAAAGTTAGCGGTTCGCGTCGGAGTGCGACCCAGTTGACCCGAGGGATTTGTTGTTTGTCACGGGG	15.876058578491213	14.461606979370115	FastSeqProp
fast_323	GGGAGCGATCTCGCAAAGGTTTCCGTTTGAAGAAGGTCCGAACCGGGCAACGCGAGGTTCAATCGAACAGGTGACCAGTT	17.708961486816406	14.682901382446287	FastSeqProp
fast_187	GTCCAAACCGGTCACCCGAACTTTTAGCGTTTTACGCACCGAATCGAGCACAATGTGCGGATAGTCATTCCGACCTATAC	15.2696	14.1544	FastSeqProp
fast_121	TTGGTCGTAGTTTCGTATTTCGTTACGTGGGTCGATTACGGCGTGGGGACGTTTTTCGCCCGATCTGATGTCTGCCTCCT	16.8489	14.9094	FastSeqProp
fast_322	TAATGAGAAAGTGATGTGCGGATCCGTTGACTAGTTGCAGCGTCGGGGTCGACGTCAGATGGGGGGCTTCGACGCGCGAG	14.63606071472168	13.239275932312012	FastSeqProp
fast_70	TGGTCCGGTACATGCACGCTGTTGTCCGCGGATGCCGGCTGTTGGTGCACCGGTCACCCGAGCTGTGGCAGCTTGTACCA	15.5373	14.9623	FastSeqProp
fast_178	CTCAACCCACAAACTCGGTTTGAGAGCATACTTTTTTCTCGCTCGTGCGCGGTGTAAGTATCGAGCGTAGTCGTAACTGA	15.475	12.5152	FastSeqProp
fast_364	GGCTACCCGGATGATTGGATTTACCGGTTTACAGGGTATTTGTTGAGTACCAATATAAGCTCTTGTAGCGTTCGCTTGAT	14.949859619140623	12.105870246887209	FastSeqProp
fast_45	CGGCCACCAGAAACAAATCCGCCTAGAGACGCAATCAAACGCACGTGTTCACACGGCGTTCGCCCGAAAGAGACCGTGAG	17.1748	15.1406	FastSeqProp
fast_33	GGTCTTTTACGAGTCGGTACCCCTTGGCTGCGATTGGGTATTTGCGTAGTCAGAGGGTAAGCTTTTCCGCGGGCTGGGGA	15.4155	14.0163	FastSeqProp
fast_231	ACCTGAATTCGGGACTGACAATATGTAGTGTCTACGCGCAGACATAAAATATCGGAGTCCCGTGGGAGGGATTGCCCTTC	14.013811111450195	13.810081481933594	FastSeqProp
fast_85	ACTCCTGGGCTGATCCTCGTATGTCTCCGTCGTGAGGGCGACGGGGAGGGAGGGCGAGCCTGCCTCGGGAAGGGGAACTG	15.6681	14.6193	FastSeqProp
fast_8	ACGTGCCTTCGGGGGAAGGTCCACGTTTCGTATGTGAAGTCTTTCTTGTTCATATTACGGGGTCTAGTGAACCGGTAGTA	13.8302	12.5896	FastSeqProp
fast_63	GATGTGAAAAGCGGGAGCCCGTATGAACTCCCTGCGAACTTCGGTTCTTTTCTGTGCAGCTCGTAGCAGGACGATTCAGG	14.1601	13.8936	FastSeqProp
fast_246	CCTCCCAACATGTTGAACGTGGATGTCTAGAATGTGCTTGTTTTGGGGCGCGAAATGATTCTGAATTCGAGCGGACCAGG	13.34310245513916	12.785207748413086	FastSeqProp
fast_25	GAATCGGAGTCTGATACGTCTTAAGAATTCAGATTTTTTTAATCGGTCGTATAGAGCGAGGCGGGTCGATACGGGCCTTT	15.664	14.7159	FastSeqProp
fast_399	GGGGTTTTGATAACGTCGAGAGGTGCCTCCTGGGCCATTTCGATCCGAGCGTACTTAACGGCAGCCCCGCTTGGACTGGA	15.72541332244873	14.483534812927246	FastSeqProp
fast_192	GGACTCCGCACTGGTAACCGTGTAGAGAGATATAAGGCTCGATATGTTGACCGAGGCACGGCTAGTGACCCCTGTGGTAA	16.4828	16.0977	FastSeqProp
fast_95	CGAGACGAGAGCTTTCGATTTCCTCTTCAGGGTATCCCTCTATGGTCAGTTGCATGTGATTGGAAAGTAAAGATAGTGTC	14.0036	15.066	FastSeqProp
fast_263	GAAATCGGAGCCGGAGCGGTCTCACTGTATATAGAGAAACGGACGAGCGGATCAGCCGCGACCATAAATGGTCTATGTGT	14.49666976928711	13.651005744934082	FastSeqProp
fast_361	TGCGTCTGAAGGATAAATGTTACTCGTAATACGGCGTCGCGAATAGGTCGCGGCCCAGCGCTGCGACCGCAACATAGTAA	14.162617683410645	11.864689826965332	FastSeqProp
fast_259	CTCCTCTTAGTAATCTTCCTGATGTAAGCTCGTTATCCTTTTGTGCGTTTTGGAGCCGGCCAAATCGTATTTAATGTGCG	14.939569473266602	13.712042808532717	FastSeqProp
fast_359	GAATTTTGTGTGCGTAATCTTTTTTCATCTATATAACGCTGCGCATACTTTCGCGTATTGACTATAGCGTATTGAAGACA	16.03913688659668	13.161169052124023	FastSeqProp
fast_57	TCAGTGAACGACCTCCAGGGGGTAATCGGTCCGCCGCTCACTGTTTGGGCTGGGTTTTTGATGCGACAAAAACTTGGGCT	17.5078	15.1302	FastSeqProp
fast_389	CCGAGCGAGAGGGGTTAGCAGTCTGCAGGGCATGGGGCTTCCTGAACCGAAGCACAGTCATGAGCCGATTAATGGAACGA	14.960895538330078	13.92402458190918	FastSeqProp
fast_342	TCCGTGGTTTAACGTGGGCTGAAGCGCGTAGCGGGAGGGCGAATGGGTCGGACTCTCCGCGATGTCTACGAAGGACTCAT	15.241506576538086	13.10875129699707	FastSeqProp
fast_265	GGGCGTTCGACCCGTAATTGGCGACGGGTGAGTGTCGTTTTTTCCGAGTTCTCTGACTAGGCGCTCTATCCTTTGAGTAA	15.61816692352295	14.90961456298828	FastSeqProp
fast_157	ATCGCCTTACTTATTCCGCTGCAAGGGCCACGGGCGAAAAGATACGCAGCGAGACAAACGCCGGTGTGGGTGCAATGTTC	16.7851	15.3376	FastSeqProp
fast_77	TAGTCTCGTCCTGCTAAATAATATTCGCGTTTCGTATCGCAGTGATCCCGCGTGTGCTACCGGTCCGCTCCGTTATTCTA	14.7297	13.776	FastSeqProp
fast_98	GAAACTCCGAATAAATTTGTTCCCGCATTGTATGAATACGGAATAACGGGGTCGACGTTACTTACCCTTATGAGCGCTTT	15.5339	14.1983	FastSeqProp
fast_170	AGTCATATTTTCGGGTCCTACGAGACCGCTTCCGGTGCACGTCCTCATATCGACGCGTTTTCTGTGCGAGCGCGATCTCA	17.1913	15.8907	FastSeqProp
fast_167	CACGCACGCCGTTGAAGGGGGGTGAATTTTGCGGATTGGCCGTTGTAATCGCATTCTCTTCCCGGGCGCCAGTGCTCGCA	16.2899	15.1655	FastSeqProp
fast_248	GTACCAGTAAACATGGTACTCACAGTTCCTTCATAATCATTTCGTAAAACTAACCTATTTAGTTGAGCACGGCGGATGCG	14.05309009552002	11.552215576171877	FastSeqProp
fast_183	CTGCCGCCTTATGTGTGTTCGGTGCGTCCTGAGGACATCTCCCACGGGCGCGAAGTAAGCCCGGGGCCTGCTTTGGCGGT	15.9056	14.5251	FastSeqProp
fast_65	ACGGGCTCCATTATATATTTGGCGCAGGGAGGCTCGTGTGAGCTCGGGGGAGTACGAATGTCCTTGAAAAAGCGCACGCA	16.4824	15.4049	FastSeqProp
fast_395	TGAAGAGCCGGCACGCAAATGGCCCGACGCTGCTCTCCAGAAATAGGCTTGCCGAGAATAATGCGAATGTTTTTCCGAAT	16.694868087768555	15.376609802246094	FastSeqProp
fast_4	GGTGGATACGACGTCTGTGCTCGGGAGGACAGGGGTAAGAATCATTAGCGAGACCCGGACGGGCCCGGCCGGGCCACACA	16.3174	15.6805	FastSeqProp
vaishnav_2844	CAGATTACTTTTCGCGATTTCACGGAGATTATATTGCCGTTTCTCCTGCAAAACATCAGTCGCTTACGAGTGGGCGGTAG	14.8468	13.9089	Evolution (V)
vaishnav_8478	TTAGAATTTTGTCACTCAGGACGTACGCGCGAATAATTAACGCCTGACTTCACTGCCACTGTGTCAACCTTGTGAGACGC	17.3343	13.9171	Evolution (V)
vaishnav_14075	TCGCGCCCACAAAAGGGAATCGATATCTCTACATAATGCTATTATTTTTTCTTGCTTGTCGCACATTATCTTACATCATC	14.4049	13.0147	Evolution (V)
vaishnav_8552	TTATACGGCCCGTCGCACGTGACCTCCGTACATCCTGGAGTTGGGATGTCGTCGTGGTACGATAAGTTAAGTTCGTTCTA	16.9032	15.4353	Evolution (V)
vaishnav_5497	GGAAGAAGAAAAATTTTTTCCCGCTCGCACTTTCCGTAAGAGGCGATAAAAAACAGACCTAATACTGTAGTAATCTTAAC	18.4571	15.6767	Evolution (V)
vaishnav_10535	ATTATTGCTTTTCTTTTTTTAGTTCAAGCCGCGCTCTTAACTCCTTCGTCACGCTTTTCTTGTCGGCATTGGAATTTCGC	16.6684	15.4813	Evolution (V)
vaishnav_8810	TTTAACCTTTTCAACAATTGCGACTTCTCTTCCGGACATTAACTAACGCACTATATCTCTTGTATATTTGGACGCGTCCG	14.4891	12.8886	Evolution (V)
vaishnav_10550	ATTGAAGCTACTCTTTTTTCTAATGTCTTTTTGTCCGGTTTTGACGGAACCGTTACAGCTTCGACGTACCAAACGATTGG	15.597	14.3708	Evolution (V)
vaishnav_8251	TGTGACTTATACTTCCGGGTGATGCCTTACTACGCGTGATGCCGGCTACCCCAAGATGTTGAGTGGCAAACTCCTGTTGT	15.7135	13.8992	Evolution (V)
vaishnav_10556	ATTGACGGCGCGTTGTAACTTATTGCCGTGCCTAGAACGAGGAATTGGACTCCCCCTACTAGCTTCCATTGGCCGTCTCT	16.7036	13.8958	Evolution (V)
vaishnav_10516	ATTATCTAGCTCTCGTGTGTGATCTTGTTCTACTTTTTCTTGCTGCTTACTCTTACTTCGCTGTCGTTTGCCTCTGGTAG	14.5037	13.0034	Evolution (V)
vaishnav_13598	TACGCGGACAAAAGAGTTTTTAACGGGATTTTTAATGTCGTAACGGTCAAAATACTGAGGCGCTTTATCGTACCTGCCCG	16.3875	14.8098	Evolution (V)
vaishnav_9857	ACGCGGATTAGAGTATAAAAGAAGGCACCATCCTAATACAGCAACCACAAGGGGCAGCACAGGCATCCAAAAGCAAGCCG	15.0652	14.4361	Evolution (V)
vaishnav_13961	TCCCCCTTTCCAACGTTACCCTTCTTTGGGCTCTTTTTTGGCGATCCAACTCCATTCTTAGAAATTTCTGCCTCTGCCAC	17.8999	15.3848	Evolution (V)
vaishnav_13126	GTCAGGTCCGAGACCATGATTCGCGCTTGGGTCGTGCCCGCTGGTGCAACGCAAGGAAATTAATCACAGTCTAGGTGAAC	15.2652	13.7158	Evolution (V)
vaishnav_9521	AAGGTATACTACTTAGCTAAACAAAAGATCTACGGCCCCCCGTGCCTAGGGCATGGGCTTGGATTCTGCGTCCTGCACCG	14.8203	13.1271	Evolution (V)
vaishnav_11990	GAAAAAGTTTGCTGCGCGTCATGCGCTTTTATGTATGCATACACATACACATCCGTGCATACATTCATATAAATACATAT	15.0512	14.4931	Evolution (V)
vaishnav_9874	ACGCGGTGCCGTAGCATTGGGTGTAAAGGCCGGGTGAGGGTCGTATGGATGCTGACAAGTGGGGCACCGCCCAGGAGTGA	17.9634	16.5047	Evolution (V)
vaishnav_14907	TTGCCACTGTAGTAGTCTTGTTAACGCGTAGCTGTTCTCTTGTTTTTTTTCTTGTTTTTTCTATATACGGCCGACGAAAA	15.9815	15.1568	Evolution (V)
vaishnav_12067	GAACTAAATAAAGTATATATGTACGTTTTATACACACTAAATAGATTTCGTAAAAACTCCTTAATATCCTTATGCTTGTG	13.4161	13.1275	Evolution (V)
vaishnav_14438	TGGTCTCTTGGCCCGGTTGGTTAACGCACCGTGCTAAGAACGCGCGGTTCAGGGGTTCGATCGCGCGAGAGACAACTTAT	16.7357	14.764	Evolution (V)
vaishnav_7370	TCATGATGGTGATACTTTACATCCTCCGATGATATTTCGGCCCCGCTATGCCGCGAATATCCCACCCTTTCGTTTCATGG	14.1461	12.9973	Evolution (V)
vaishnav_5763	GGTGGCGCGAATAGTAATAACCGCGTTGAAGTTCAATTCGCATCACATTGGCCCTCGCGCGTATGTATTCACCAAAGCCG	17.7757	15.1984	Evolution (V)
vaishnav_3801	CTAAATATCACGCATGTAAGCGACCGCGATGAAGCGTACTGGCCGCTCTATCACGAAGCGATGGAAAAATACACCTGCGA	15.697	14.5113	Evolution (V)
vaishnav_11713	CTCCGCGCGGGTAGAGGAATCCTCAAGGGGGAAGCGATATTTCTACATAAAATTATTACGATTATTCCTCATTCCGTTTT	13.5933	13.1786	Evolution (V)
vaishnav_14601	TTACAATGCCGATCATGCACGGACCGGTCGTATCTATGGATTTTTCAGTTATGGAGCGAATCTGAAACAAACACGGAGGG	16.2247	15.2954	Evolution (V)
vaishnav_12111	GACCTGGCCCCGATCGACATTGGTAGGCTTTACTGTTTTCAGGGGCTAACACGCGGTGTGTAATACTTGCGTTTTTCGGA	14.6387	14.5318	Evolution (V)
vaishnav_14145	TCGTACGGTACATGAGCTCTTGAAGTGACTTTATGGGGACCAATTTGTCCTATCGTGATATTACTCCGGGTAATACTACC	15.8427	13.7862	Evolution (V)
vaishnav_5503	GGACAACAGGCCGACTCCGTGGATACGAGCTTAAGAAGAGGCCCCAAGAAAATTCTGATGACGCGGACAACCCATCTATG	15.4659	13.6281	Evolution (V)
vaishnav_11773	CTGACTTGGTGCGGCCGCGAGATTCTGGTTCCTCAAGGAAAATTGTATGAGATAATTTAAAACAAATTGAGTTGAAGATT	15.0791	12.8179	Evolution (V)
vaishnav_14747	TTCCCATTCAAATGAATGTATTAATAAATTCTCATCATTAAAAGGAGGGAAAAATCACTTATAACGTAAAGATAAAACGC	15.3837	13.4543	Evolution (V)
vaishnav_12693	GGAACGGCACACGGGGGGTTAAGACCTAAATGCGACTATTATACGAAGAATTATTTAAAGCGATGGATGGCGCGTCGCGC	15.8317	13.0714	Evolution (V)
vaishnav_14864	TTGATCACTATAAACGACAATCAAGCCAAACCTACACCCAAAGTGGGGTCAAATTATACTAGAGGAAGCACAGCCCCCTT	16.0227	15.1261	Evolution (V)
vaishnav_14352	TGCTCAGTTATTCTGCCATCTGCTTGCTTCCCAAATTATTCCTTGATCATGTACAAAACTCACCTGTCGTCGCTAACTAC	13.5687	12.4458	Evolution (V)
vaishnav_14903	TTGCACTTTCTTTTCCTTTCCGTTTTCAGGGCGCTTTTTCATTTCGGTGTTTGATGGACACACATGAAGTGAAATGTCGC	16.0024	13.621	Evolution (V)
vaishnav_10064	AGACCATCCTTGTCCGAACTCGGGTACGAGTTGCCCGACATATTATAACACGATAACGGTGAGTTCGAGGACGTACGGAG	14.8934	14.2675	Evolution (V)
vaishnav_14702	TTAGTAAAGATTAAATAGTATTTAACTTGCACTATTCTTGTATCTCCGTAATCGGTCTCCGTCTAAAATTACTTTGAGAT	15.743	13.9662	Evolution (V)
vaishnav_12445	GCGCCGTATGCCGTATAAAATGGTAAATGATATATTCGGAGAGTTTAGTAGAGGTGTGCGGATGCTGGCTGTGTTACGAT	16.6453	15.5724	Evolution (V)
vaishnav_9047	AAAAAAAAAAAAAAAGAATTGGCGCATGTGAAGTTTTATTATCGTACGCGTTATTGTTTGCGCTAACATCGCATCGCATC	14.6166	13.3756	Evolution (V)
vaishnav_3358	CCGTGGATAATTCCCGGTTGGATGATAATTATAGGCTTAAGGCCGAGTTCCGGGACGGGAGAATTCATGATCCTCATCCC	14.3497	13.3796	Evolution (V)
vaishnav_5983	GTCACAATGTACGTCTAGCTCTTTGACACAAGCTGTCCTTACACCAAAATTTGGAAAGCACACACTCTGGGCCTTCGCTC	15.5096	13.543	Evolution (V)
vaishnav_14802	TTCGTAAATTCGTATATAGTGATAATTAATACATAAATTATATAATTGTAATCTTATTAATAACACTAATAACATCCTCA	16.0504	13.306	Evolution (V)
vaishnav_14610	TTACAATGCCTATCATGCACGGACCGGTGGTATCTATGGATTTTTCAGTTATGGAGCGAATCTGACACAAACACGGCGGG	14.3023	13.5788	Evolution (V)
vaishnav_12600	GCGTGGTTTATTAACTCCATGATTCCATTCCTATTTGTTTTTCTTTCTTTCTGAAAATTTTCTTCTCCTCGAAGTTACCC	17.8046	15.6322	Evolution (V)
vaishnav_12726	GGACAACAGGTCGACTCCGTGGATACGAGCTTAAGAAGAGGCCCCGAGAAAACTCTGATCACGCGTACACCCCATCTATG	15.8003	14.8313	Evolution (V)
vaishnav_3579	CGCTATCGTTATGTACGGCAAACCTACCACACATCTTGGGTTATGAAAGTCTGGTATTAGCATCAGGTATACTTTAATTA	15.2289	12.598	Evolution (V)
vaishnav_13851	TCACAATGAACAGTTTGCTACGCGCAATGACAATCATCGAAAGAAGTTCTTGGCTTAGTGCGCCTTACATCGTTTTATAC	16.5121	13.8503	Evolution (V)
vaishnav_1266	ACGGATGGAGGTTCCCTCTGATGCTGTAATCCGCGGGTGACCCGCAAGCGGCGAATAACCGGGCTACGCCAGAAGTTCAA	15.4941	13.7651	Evolution (V)
vaishnav_13648	TAGATAAAACCCCAACTTCTTGATACTAACCTAAAACTGTATACTTATACATTTTTATATATCCTCCCTCTTACCCTCTC	14.6123	13.6977	Evolution (V)
vaishnav_9236	AAACTGAACCCGTTTTAGACAATTTCAATCAACATACTCCACTCCGTAGTGAGTGACTTTTGGAGTAATACGAAGTAACC	15.1333	13.4942	Evolution (V)
vaishnav_13254	GTGGGAATAAAGTAATGCCCTGTGACGGGGTTCGTCGCCCGTGATAGGGTGAAAGGATTTTGCCGTTTCACGATACTTCG	17.5809	15.9067	Evolution (V)
vaishnav_14643	TTACTGCGCGCTTGATGATAGGTTGCATACCGTTTTGAATTTTTTTGCCGGTGGCGGCATTCATCTTGAACATCCGAAGG	15.5884	14.3249	Evolution (V)
vaishnav_13922	TCATGAGGGTGATACTTTACATCCTCCGATGATATTTCGGCCCCGCTATGCCGCGAATATCCCACCCTTTCGTTTCATGG	15.7833	14.1184	Evolution (V)
vaishnav_2542	CAAAGCGCGCGTCGAGGCTATCAGCCAGTCTCTAAGGGACGAATCCTTGACTGTAGACAATCTTTCAATCGCCATCGTCG	14.5437	12.4601	Evolution (V)
vaishnav_11003	CCCCGAATACTTTGCTGCTCAAGCTTAAGTTTTTTTCAAACATTTGAACTAACTTAAAAGAGAAATTTTTTTGATTTAAA	14.0495	13.0413	Evolution (V)
vaishnav_7380	TCATTTCCTGCAAGCGAGAAAAAGAAATGACGGCATGAAAAGAGTCAAAATGTCGGGAACCGAAGCCATTGTCGGGGAGC	16.8506	14.6805	Evolution (V)
vaishnav_14143	TCGTACGGCACATGAGCTCTTGAAGTGACTTTATGGGGACCAATTTGTCCTATCGTGATATTACTCCGGGTAATACTACC	16.7634	14.8284	Evolution (V)
vaishnav_13289	GTGTCCTAGTTCGAGGACAGTGCCGATTCAGCATAAACGTTTTATGACACCGCTGATTCACTGTTTTCCATGGGTTGCCC	14.0991	13.1925	Evolution (V)
vaishnav_11568	CGTAGTTCAACTGCGTTTGTTAGCTTTTGTCATTGTGGACGATTCGGGTATCCGACTTGGGAGCCAGTTGGGAGAGAGGG	18.1328	16.6395	Evolution (V)
vaishnav_9561	AATAACAAGAGAATTGGTACACCATGGCGCGCCTTTTTCAAACTCGGACGAAGAACTATAAAAATCTCTGGAAGCTTATT	16.1453	14.6518	Evolution (V)
vaishnav_3354	CCGTGGATAATTCCCGGTTGGATGAAAATTTTCGGCTTAAGGCCGAGTTCCGGGACGGGAGAATTCATGATCCTCATCCC	17.5523	15.6454	Evolution (V)
vaishnav_5501	GGACAACAGGCCGACTCCGTGGATACGAGCTTAAGAAGAGGCCCCAAGAAAACTCTGATGACGCGGACAACCCATCTATG	14.7159	12.9006	Evolution (V)
vaishnav_7680	TCGGTAATTGCCGGGTAACCCCTCACTATTAATCAAAAAATCCACTGGAGCTTTCGTCCTTGATTCATCGGTACGCTATC	16.6863	15.1642	Evolution (V)
vaishnav_1335	ACGTGAGCATGAAAAATTCAAGTTAGTACATATAAAAGGCTTTGAGATATTGCGGAGTGACAACAAGAGTAATACAGAGC	14.8503	13.4791	Evolution (V)
vaishnav_9822	ACGCGAAAACTAGTTCATTTCTTTTTCTTTTCGCCGTGGACTAGTACTGAAAATTTCAATAGCATTATATTTGAGCCATA	16.4661	13.6016	Evolution (V)
vaishnav_12446	GCGCCGTATGCCGTATAAAATGGTAATTGATATATTCGGAGAGTTTAGTAGAGGGGTGCGAATGCTGGCTGTGTTACGAT	15.6997	14.4211	Evolution (V)
vaishnav_12355	GCAACGGACGTACAAAGTTACGAACAAGAGCCTGAAGTACCCTGACACGGTGATTCAAATTCATTTCACTGTGCACTGAC	16.0467	14.1175	Evolution (V)
vaishnav_8030	TGGAAGCGGGCTGTTATCCAATCTTCCGAACTATATGGACTACGACGGCTTCTTGGTCGAAAATATCACTATTCACGAGG	17.0991	15.2058	Evolution (V)
vaishnav_11262	CGATAATGCGATATTTGAGTCAACGGTCCTCGTGTGGCAGCATATAGAGTCATTTATTACGAACGGGCTGTGATCTGGTG	17.2311	15.2239	Evolution (V)
vaishnav_7591	TCGATACGCGCGTTAGCTATTTTCGCGCGTTTTGTTTGTTCCTATGATCTCAGCGGCGTCCAGATGCTAGTTGAAAAGGA	15.9108	14.0887	Evolution (V)
vaishnav_13137	GTCCCCAGTGATAAATTGCTTGGATCATAATCAACCAGGGGTACATAAGCAGTCAATATTGTATTATTGAGTCCTCCGGA	15.4933	14.0806	Evolution (V)
vaishnav_10682	CAAGTGAAGTATTGGCAAGGTATGGGTGCAATTATTTGAAAGGAAGGAGAAAAATTCTGACAGTACCTTGCTACCAAAGG	16.9365	16.5638	Evolution (V)
vaishnav_12136	GACGCGCCTGTCGGTCCGAACATAATGTGCCCCGACGACTAAGTCTAATATAAAATAGCCTTACGTATAAACCGTGGAAT	15.2443	13.6217	Evolution (V)
vaishnav_10077	AGACGGGGTTCTTGACGAAAGGGTCAGGGGGGGTTTGTCGGTTGTCGCTATTCCCCGCTATTGATCGAACCCCCGTACGC	14.1908	14.4545	Evolution (V)
vaishnav_13682	TAGTTGGTTCTATTTCGCCGGGTAATATTCTACTAATACCAATGACACTATAAATATACCTAACAGAAATTCTTCTTCAG	16.9212	14.6396	Evolution (V)
vaishnav_14599	TTACAATGCCGATCACGCACGGACCGGTCGTATCTATGGATTTTTCAGTTATGGAGCGAATCTGAAACAAACACGGAGGG	17.0652	15.8186	Evolution (V)
vaishnav_1861	AGTGTTATTACTTTGATTGACTCCTTCTTACATTTTCTGATAGGCCGAAGATAAGCGGCGCCCTAAGAAAACTCGCGCGA	15.4664	14.7968	Evolution (V)
vaishnav_9455	AAGCTTTTGAATAATGCTTATGTATTATATATATATATTTTTCTTGTCCCGCACTCGGGTCTTTTCAATTTTCTACATGC	15.4542	14.3885	Evolution (V)
vaishnav_14691	TTAGGTAGGTGTAAGGGTTTCCTATACCTGTATACACAAATTTCAAACTTATGGCCGAGCCAGATAGTCCTTTAGCTATG	15.3138	13.3421	Evolution (V)
vaishnav_14183	TCTTGTTATAGCTTTTTGTAGTAATCGTCGTAGTGTAACAGTAATCTTACTTCAGGACTCCGAAAATTTCTTGGTTTTCG	14.0553	13.2587	Evolution (V)
vaishnav_14912	TTGCGCACACAAAAGGGAATCTATATCTCTATATAATGCTATTATTTTTTCTTGCTTGTCGCGCATTATCTTATATCATC	15.7618	14.1888	Evolution (V)
vaishnav_10350	ATCCCGATATTAAGCCCGAGGGGTGTATAGTGTCCGAAGATGGTAATCCAGGGGTAAAATCAGCCGAGGCAGTTGGTGCG	15.6936	15.7605	Evolution (V)
vaishnav_13760	TATGCACTGGGGCGAGGTTTTTAGGCCCTTTCTTTTCTTAGAGGAAAAATATTCACATGTTCTCGCTAAAATCATATAAA	15.6652	15.1246	Evolution (V)
vaishnav_14269	TGCAATCCCGTGTATGCTAGACCAACCTTACCCGGTTTCACAAACTCATAAACGAGGAGTGACGAGACTAAAATGTATTG	16.0899	14.5881	Evolution (V)
vaishnav_823	AATAAGTTCATATAGCTTGTGCGGCTATTCATGCGTAATATAATGATCATTATGTACGACCCATCGACTCTTAGAGCAAA	13.9243	12.8812	Evolution (V)
vaishnav_9212	AAACAAGGTCAACTGAATATTTTTGTAGGGTAACGAAAGATCGTCCAATCATACGCATCCAGACATGTCACATTGGCGCG	15.714	12.8524	Evolution (V)
vaishnav_10720	CACAGCTCTATCTCGTGTAAGTGGATTTTCGGGTAAGTACCATGCGAACGGATTAGCCATGCCGTATGTGGTCATCCACT	15.737	13.5576	Evolution (V)
vaishnav_11074	CCGATACGCGCGTTAGCTATTTTCGTGCGTTTTGTTTGTCCCTATGATCTCAACGGCGTCCACATGCTAGTTGAGAGGGG	15.4578	13.9737	Evolution (V)
vaishnav_6115	GTGCACAGCCGAACTCCGATTTCGGTAGATGCAGAAAAAAGTCATCAGCTTTGTGTGACGGCCATGGAGGCCGATGAGTA	15.1413	13.036	Evolution (V)
vaishnav_14321	TGCGATTCATTATTGACCTAGTAAATGTTTGGGTGGATACTACAGTACCCCTTGACATAAGTCAGTAGTTATAAAAATAT	14.8043	14.3653	Evolution (V)
vaishnav_2094	ATCATTTGATCGATATTGACTTTTCGTAATGGGAGACACATATTTTTTTACAACGGACAGCCTGGAATCTGCGGGCTGGA	14.262	13.7146	Evolution (V)
vaishnav_5745	GGTCGAAGGGCGCGAGCGGCGTTTCTTGTGTTCGTCCACCCTGATAATGTGGAAGGGAATCAGTACTTGAATCTTCAGGT	15.6141	13.4416	Evolution (V)
vaishnav_11910	CTTGTCTGACCGCAGACGTTACTTTGCCGCGTGCGAGAGTAACGTAACGGGCCGTAACACTTGTCGGAATAACCAGCGCG	16.1845	14.7949	Evolution (V)
vaishnav_1350	ACGTGGCCGAGTATAGACGGAATGACAGCAGGAACACAGACGTATAAATACGTGTTCGAAGAACGACTTAATTTAATGAT	16.445	14.9396	Evolution (V)
vaishnav_11448	CGGACTTGGTGCGGCCGCGAGATTCTGGTTCCTCAAGGAAAATTGCATGTGAATATTTAAAACGAATTGAGTTGAAGATT	15.5435	15.4122	Evolution (V)
vaishnav_12694	GGAACGGTACACGGGGGGTTAAGACCTAAATGCGACTATTATACGAAGAATTATTTAAAGCGATGGATGGCGCGTCGCGC	15.1164	12.9261	Evolution (V)
vaishnav_11897	CTTGTCCCGTAGAAATGAGAAAAACCATATATTATAAATAGGCACATATTCCATATACTTTGAATATTTTTTTGCAATTC	15.0806	13.6595	Evolution (V)
vaishnav_14925	TTGCTTTTTTCCTTGTATCACTATTATTTTTTTCCACTCTTAACAATGTGTGTAATTGTTAAGTCTGGCTGTTGACTCCG	15.8541	14.355	Evolution (V)
vaishnav_3476	CGATGTTCTTTGTCACGAATGACGGCCGTTTGGGGTTTGACCATAATGCCACCATCTTTTGCTAACCTGAGTATATGCAT	15.7766	13.7384	Evolution (V)
vaishnav_5204	GCGCCATATGCCCTATAATATGGTAAATGATATATTCGGAGAGTTTAGTAGAGGTGTGCGGATGCTGGCTGTGTTACGAT	13.7244	12.8764	Evolution (V)
vaishnav_10194	AGTCTGTCGAGGAGTTTGTAACTACTGGACCGCAAGCGCGGAGCGGGCCTTACCCGTAGATAACACCAATTTGGGCTAGC	15.1071	13.1405	Evolution (V)
vaishnav_9692	AATTTTGAAATTTTCTTCGCGCTAAAAAAAAGAAATCTAACTGAAAAAAAAAATTATACCTCAGCTCACCGAATGCATCT	17.2822	13.4525	Evolution (V)
vaishnav_14888	TTGATTGAGTATATAGCTGTATTCTAAATATATATTTATATATGTCTGGGTTTTGCCCTTTCCTTCCTTTCCGTCTTTAT	14.4467	14.2779	Evolution (V)
vaishnav_5334	GCGGTGACTGGGTGCCAAACAGTGCGGCGTTGCCGTGCGCAAGGTGGTCTGCGGTAGGAAAAAGAAACAAAAAGTGCCGT	14.4668	14.688	Evolution (V)
vaishnav_12671	GCTTCCCTCGCTTCGTCGAAAATTCTTTCTTTATTTTCTCTGCCCTTTTTATCGGTTTGTGCTAAAGTGACTACCTTGGA	15.1722	14.3378	Evolution (V)
vaishnav_11707	CTCCGCGCGGGGAGAGGAATCCTCAAGGGGGAAGCGATATTTCTATATAAAAGTATTACGATTATTCCTCATTCCGTTTT	15.3323	15.7956	Evolution (V)
vaishnav_9935	ACGTTTTTGACTAGTAAGTTTCATTCCGGGTTATATCTCAATGTCGGATCTCAAGCGCCTAAATACTCCGGCTTGCATGA	14.3851	12.7782	Evolution (V)
vaishnav_10276	ATAGCGCCACACTTCTCAAAAGCAGTGGAAAAAAAAATCATTTCCCAGAAGAACGCGAGAGAACTCCATAGAAAAAAGGG	14.6335	13.6075	Evolution (V)
vaishnav_6710	TACGCGTTGATGTGGCCGCATCATGTATTGCAAGGCCGACCACGGCAGGGTATCTTTGTGTAGTTAAGGCCACTGGGAGC	14.1548	13.4145	Evolution (V)
vaishnav_12220	GATAATGATCATTACCCCCCCTACACCGTGTGCGATGATGTTGAGTACGGACTAATTCTCTTATGCTACACCGGGCAGGG	16.1321	15.6323	Evolution (V)
vaishnav_12007	GAAAAGGTACTTCTATACGAGTGAACACGAGGAACAAAAAGAGTTGCGAAAGAAGTATGAGACCATGCAACCCCTTAGTG	14.5371	13.1432	Evolution (V)
vaishnav_9914	ACGTATGTACTATACCTAGGGTAACACGGTCGTATCTAACGAGCGGAGCGAAGCTGTCACAAAGGACTAGAGTTCGGTCA	16.6034	15.0932	Evolution (V)
vaishnav_10223	AGTGTTATTACTTTGATTGACTCATTCTTACATTTACTGATAGGCCGAAGATAAGCGGCGCCCTAAAAAAACTCGAGCGG	14.5136	13.4355	Evolution (V)
vaishnav_11771	CTGACTTGGTGCGGCCGCGAGATTCTGGTTCCTCAAGGAAAATTGCATGTGAATATTTAAAACAAATTGAGTTGAAGATT	15.7824	15.2959	Evolution (V)
vaishnav_12997	GTAAGGTAAAAGACGGGGGGGCAACCTATGGTCCGGGTAGTATAGGAGTACGTACAACGTATGGGAGAAGCTAGCGTCGT	14.823	12.7892	Evolution (V)
vaishnav_10590	ATTTCGGTCAATCGCTATTTTAATTTTTACTGTTCCGTGCATCTTTTACGAATCCGAAATTAGCTCCGCTCAAATTTGTA	16.0779	14.5054	Evolution (V)
vaishnav_10147	AGGCTATTCGCGGGGCTCCTGCCGAGGACGTTTTTAGGCCTGCTAGCCGTTGAGAACCCAAGCCATGAAGCCTTAAGGAG	14.629	13.9225	Evolution (V)
vaishnav_1194	ACGCGCATAACCAAAATTAAGGAGGCACAAGAGCTCTGGAAAAATATGCAGGGGCCGTCACAGGTGACATCTATTGCAGC	15.3135	14.2571	Evolution (V)
vaishnav_11047	CCGACGCGTGACTGGTGCCGTTTCGATCCGATATGTACGGCGTTCAAGCGGATTCGGGTAACGGATAGTGATGCTAGCAA	17.4143	16.0176	Evolution (V)
vaishnav_13890	TCAGAACTCCTCCGTTACTTAAGTCGTGTATATATTCCCCTTCCTTTTTTCTTACAACTGTTCTTGGTGTACTATTTCCG	15.3814	13.9493	Evolution (V)
vaishnav_14529	TGTGACTTATACTTCCGGGTGATGCCTTACTACGCGTGATGCCGGCTACCCCTAGATGTTGAGTGTCAAACTCCTGTTGT	15.1015	14.9525	Evolution (V)
vaishnav_13695	TATACAGAGGTAGATCCTTGAGACAGATAGACGTCCCACTCCGGGTTATCTTTTCACAAAACCCGGAACGGAGTTCTTTG	15.8191	13.9018	Evolution (V)
vaishnav_13371	GTTGAGTAACCCGCAACCCTTCGGGTATCAGAATCCGGCCAATAGCAAGAGTCAGATGGCAAACGATTGAATTGAGAGCG	15.7255	13.6816	Evolution (V)
vaishnav_13436	TAAATAGAGAACTCTTGAGATTGCCTCATTCAGGTTGTAGTTCTTGGTTTGTCTCCCTAACTGTTTCTTACATTCATCCG	16.3593	14.4356	Evolution (V)
vaishnav_14107	TCGGTACTTGCCGGGTAAGCCCGCACTATTAATCATATAAGCCACTGGAGCTTTCGTCCTTGATTCGTCGGTACCCTATC	15.315	14.4697	Evolution (V)
vaishnav_13629	TACTAAGATGTATGGTTTTTCTATTTTTGTGCTCCGTGTCGATATTTCGTGGAGCAAACCAGAAAAGATGCGGAACCTCT	14.3078	13.1612	Evolution (V)
vaishnav_8732	TTGGTAAAACCCTAACATCTTGATACTTACGTAAAACTGTATACTTATATATTTTTATATATCCTCCCTCTTACCCGCTC	15.8488	14.6629	Evolution (V)
vaishnav_14115	TCGGTCACACCCACACCCACTTAAGGACTGTTGCTAGCACGGCGGCCGGATGGTAACAGGCTAAGATCACGTCAAACTCC	15.1263	13.8478	Evolution (V)
vaishnav_10504	ATGTTGGAAACCGGGTAGCCCCTTGTATCCTGTTGAACCAATTGCGGCACTTTATTCGTGAAATAAGGGAATAAAGTCTC	13.4939	14.2355	Evolution (V)
vaishnav_5443	GCTCTAGAGACACGCGATGTTTTTCTTGCCGGCGCAGGACAATTGTCTCTACCCTTCCAATCACACATAGAGAGCCCCCG	15.7103	13.5472	Evolution (V)
vaishnav_12224	GATAATGATCATTACGCACCCTACACCGTGTGCGATGAGGTTGAGTACGGACTAATTCTCTTATGCTACACCGGGCCGGG	13.125	12.9432	Evolution (V)
vaishnav_11176	CCGTGTCCGCGTTGAGAACTTCTAATATGTTTTGTATGCCGAATATTATAGCTATAAAAAAAAATAGAATCTCAACAATT	15.2103	14.6056	Evolution (V)
vaishnav_8755	TTGTACGGTACATGAGCTCTTGAAGTGACTTTATGGGGACCAATTTGTCCTATCGTGATATTCGTCCGGGTAATACTTCC	16.7914	14.5528	Evolution (V)
vaishnav_4174	CTTAAAATGTACCAAATATCTTATACGTTTGTAGTTTTTCTTTTCCTTTTTCTTGATTTCTTTGGTAAGGACGCGGTAAT	13.7673	13.0776	Evolution (V)
vaishnav_11570	CGTATACCATGAGGCATCAGGCCTACTTTGTCCCCGAAAGGTTAACGGTTAAACACAATTTAGGTCCTTTTCGGCCCTCG	14.4172	13.7515	Evolution (V)
vaishnav_8542	TTATACGAAAACTGACTTACCTAACGATGGTCACTGAAGGGGTGAACAAGGCCGGCATGTTTACAACAGGGTAACCCGCC	15.8137	14.647	Evolution (V)
vaishnav_10174	AGGGGTGGGTCCTATGCGGTAAATGTCGGAAGCCCCTCGTGGTTCGCGATCGAACTGGTGCCGCTACTTCACGGAGCGAA	16.7046	16.0425	Evolution (V)
vaishnav_11447	CGGACTTGGTGCGGCCGCGAGATTCTGGTTCCTCAAGGAAAATTGCATGTGAATATTTAAAACAAATTGAGTTGAAGATT	15.5222	15.5659	Evolution (V)
vaishnav_14544	TGTTACCCGGCCGCCTAATTTTAGCAACCCCTGATAGGCACCTAGGAATAAACGTTCACTACTTTGGAAATCCATCTTTC	17.4125	16.1164	Evolution (V)
vaishnav_11595	CGTGCGGCGCCTTTGCCGAATTTGCGGAAATCCGCCTCTCGGTCCCGGGGCACCGCGTAATGAGCATCCCACTGACCGGG	16.6854	15.6154	Evolution (V)
vaishnav_14528	TGTGACTTATACTTCCGGGTGATGCCTTACTACGCGTGATGCCGGCTACCCCAAGATGTTGAGTGTCAAACTCCTGTTGT	14.76	13.8616	Evolution (V)
vaishnav_51	AAAAAAGAAACTACATTGAATGAAATCGAAAAGAAAAATTTTTCTCCGTACCCGTGACCGAAAAAATGTAAGGATGTAGA	17.7219	13.6487	Evolution (V)
vaishnav_4409	GAAAATTTCGGCTTCCTCTCGGTCTGTGATTTTTTCGCCTTGCTTTCTAGGTTAGAGCCTTTCTTCAAATTCGGTTTTTC	17.0947	14.4994	Evolution (V)
vaishnav_11250	CGAGCCGAAGAACCGGACACGGGGCGCGACCTACTTCACCATATGCCACGCACCTCAAGTTAGGGGCTCATGTTACTCCG	16.8734	15.5587	Evolution (V)
vaishnav_10277	ATAGCGCCACACTTCTCAAAAGCAGTGGAAAAAAAAATCATTTCCCAGAAGAACGCGAGAGAACTCCATATAAAAAAGGG	16.0546	15.2641	Evolution (V)
vaishnav_6967	TATACAGAGGTAGATCCTTGAGACAGATAGACGTCCCACTCAGGGTAATCTTTTCACAAAACCCGGAACGGAGTTCTTTG	16.0916	13.9418	Evolution (V)
vaishnav_14779	TTCGCATCCTCTCCTGGCGATGAAGACGTACCCGGAGAAAGTGTTAGCAGCAAATACCAAGATTCCGACAATGCCGCTCC	16.2148	13.8952	Evolution (V)
vaishnav_10849	CATTCTTTTTGGTATTATGTTCTGGTAGGTTTTTTTCACATGCTACATTTCGGCATTCTCACTGAATATAAATATATATG	14.3325	13.9517	Evolution (V)
vaishnav_12549	GCGGTGACTGGGTGCCAAACAGTGCGGCGTTCCCGTGCGCAAGGTGGTCTGCGGTAGGCAAAAGAAACAAAAAGTGCCGT	14.8108	14.0497	Evolution (V)
vaishnav_3600	CGCTCTTTTTTTCGCTTTTGAAAAAAAAAACAATGTGGACGCATCATCTAGGAGCGACTGCTCTTTGGAATTAGGTGCCG	17.2648	14.6002	Evolution (V)
vaishnav_13759	TATGCACTGGGGCGAGGTTTTTAGGCCCTTTCTTTTCTTAGAGGAAAAATATTCACATGTTCTCGCTAAAATCAGTTAAA	13.6259	13.305	Evolution (V)
vaishnav_12419	GCGAAAATTGGGAAACGGTCAAAAAAATTGAAGCGCGCATTTTCAGATTTACTGTTGACCCTTTCCATGGACAGGAGAGA	17.2718	14.0133	Evolution (V)
vaishnav_2454	ATTGAAGCTACTCTTTTTTCTAATGTCTTTTTGTCCGGTTTTGACGGAACCGTTACAGCTTCGACGTACCAATCGATTGG	14.1126	12.7379	Evolution (V)
vaishnav_14889	TTGATTGAGTATATAGTTGTATTCTAAATATATATTTATATATGTCTGGGTTTTGCCCCTTCCTTCCTTTCCGTCTTTAT	14.2719	14.6522	Evolution (V)
vaishnav_12112	GACCTGGCCCCGATCGACATTGGTAGGCTTTACTGTTTTCATGGGCTAACACGCGGTGTGTAATACTTGCGTTTTTCGGA	14.0794	12.4216	Evolution (V)
vaishnav_12922	GGTGTTATTACTTTGATTGACTCATTCTTACATTTACTGATAGGCCGAAGATAAGCGGCGCCCAAAAAAAACTCGAGCGG	14.5196	13.9138	Evolution (V)
vaishnav_12263	GATCGAACACGCACGCGCCCGTGCAATGCGCCCTCGTTGAATGTGCGCGGGAGGACGCAGCGCTAACCCTTCTAACTCCG	17.5724	16.036	Evolution (V)
vaishnav_14856	TTGATAAAACCCCTACTTCTTGATACTAACCTAAAACTGTATACATATAAATTTTTATATATCCTCCCTCTTACCCTCTC	15.4618	15.168	Evolution (V)
vaishnav_10335	ATCATTTGATCGATATTGACTTTTCGTAATGGGTGACACATATTTATTTACAACGGACAGCCTGGAATCTGTGGGCTGGA	14.6541	14.3728	Evolution (V)
vaishnav_649	AAGGCGCGAAGGACTTCTGGCTAGACTAAGGTCCGCCCCGAAAACCTCTATTGTGCAAGGCCGTTGATCGCGCATTAAAC	15.6259	14.2056	Evolution (V)
vaishnav_10256	ATACGCGGCCCGTCGCACGCCACCTGCGCACATCCTGGTGTTGGGATGTCGTCGTGGTACGATAAGTTAAGGTCGTTCTA	15.6888	13.4964	Evolution (V)
vaishnav_15146	TTTTTCTTTTTTTTTTTTGCTGCTGTTACCTTCGCCGCTAAAAAATCATTTAAAACAAGAAAAGAGTACATTGTTTGATG	15.8359	13.4419	Evolution (V)
vaishnav_5477	GGAACAGTACACTGGTGGTTAAGCCCTAAATGCGACTATTATACGTAAAATTTTTTTCATCGATGGATGGTGCGTCGCGC	15.4217	12.9283	Evolution (V)
vaishnav_14118	TCGGTCAGATTAGGGCCGAGATACCACCATACTTCCCATCTTAATCTGGGCCGAGAAGAAAGTGTAGAGATTTGCTTCCG	15.2198	13.5534	Evolution (V)
vaishnav_10129	AGCCTTGCCCGACAATCCGTTGAAGTCTCGTCCGCCAAAATACACGACACTTAAAGTTCGTGCACGCGGTTCGTAGGGGG	14.8973	14.791	Evolution (V)
vaishnav_14711	TTATAACGCGGTCGTCCAGATGTGACTGTGAAAACCGCCCCTTTCTGGATTGTAAAAAACATCCCGGGGCTTCTAACCCC	14.356	14.5331	Evolution (V)
vaishnav_1185	ACGCGAAAACTAGTTCATTTCTTTTTTTTTTCGCCTTGGACTAGTACTGAAAATTTCAATAGCATTATATTTGAGCCATA	16.1755	13.4737	Evolution (V)
vaishnav_8120	TGGTCTCTTGGCCCAGTTGGTTAAGGCGCCGTGCTAATAACGCGCGGATCAGCGGTTCGATCCCGCGAGAGACCACTTAT	14.6636	12.5618	Evolution (V)
vaishnav_15043	TTTCGCGCGTTGATCTTACTATCATTTGGATTTTTGCCGAAGGTTATAAAATTGCATGTGACAAGGGGCACCAAGCATAG	15.0142	15.077	Evolution (V)
vaishnav_730	AAGTTAGCACCATTCTAGAGCTACGCGACAATAGTCCCGTAGGAAATGATCGTCATGCACGGACACACTCGGAAGGCATT	17.4881	15.9471	Evolution (V)
vaishnav_10684	CAAGTGAAGTATTGGCAAGGTATGGGTGCAATTATTTGAAAGGAAGGAGAAATATTCTGACAGTACCTTGCTAGCAAAGG	15.2306	14.9545	Evolution (V)
vaishnav_13267	GTGGGGTACGATCCTATGTTATCTAATTGGGGGTCATACCGCTAGCGCAGACTAAGAGCGCCATCGTCGGCGATGACAGG	15.4688	14.6281	Evolution (V)
vaishnav_10352	ATCCCGATATTAAGCCCGAGGGGTGTATAGTGTCCGAAGATGGTATTCCAGGGGTAAAATCAGCCAAGGCATTTGGTGCG	14.6905	15.4174	Evolution (V)
vaishnav_4241	CTTGCTACTACTTCATAGATTTTTTTTTTTTTCATCTATCCCCTTCCATCCCCTTCTGGTTCTACCCCTTCCGCGTGAAA	14.1172	14.1367	Evolution (V)
vaishnav_10541	ATTCTGTACGCACCAATGTTATCTACCAGAAAATCAATCATCTTTTGTTCAGCATCGCTATCGCTAAACCAACAGTCCCC	15.3531	13.4558	Evolution (V)
vaishnav_13092	GTAGTTTGTAGTAGAAATTCTTGTCGTAATTGTATATCGTCTCGCATCTTGTTTAAAATACTGTTAAAGATTGCGTTCCG	17.0335	14.339	Evolution (V)
vaishnav_6932	TAGTTGGTTCTATATCGACGGGTAATATTCTACGAATACCAATGACACTATTAATTTACCGAACAGAAATTTTTCTTCAC	16.9622	14.7977	Evolution (V)
vaishnav_11202	CCTGAAAAGTACAGTTGCTACTTTGAATAGCCCACGGCGCGCTATCTCCACTAACAGCAGACTCCTCTGAAAAAGTTTAC	14.7508	12.4885	Evolution (V)
vaishnav_6834	TAGATAAAACCCTAACTTCTTGATACTAACCTAAAACTGTATACTTATATATTTTTATATATCCTCCCTCTTACCCTCTC	15.1034	14.4336	Evolution (V)
vaishnav_2006	ATAGGCCGTGCCGAGGGACGCGCGTTCACCGCACCACCACCGAGAAAAAACAAACTTCGACTCAAAATGAACTCGAGGCA	18.6464	15.9054	Evolution (V)
vaishnav_8541	TTATACGAAAACTGACGTACCTAACGATGGTCACTGAAGGGGTGAACAAGGCCGGCATGTTTACAACAGGGTAACCCGCC	16.5937	16.5261	Evolution (V)
vaishnav_9752	ACATCGCGAAAAAGAAGGCTGTTAAAGACGCGAAAAAGCAACGTAAATTGGAAAGAAGAAAAGCTAGAGCAGCAGAAGGA	15.5161	12.4409	Evolution (V)
vaishnav_11445	CGGACCGTACTTACCCTGTCGGGAATGTGTACTGGGTTGATGGCGTGCGATCTCATAAACAAACGAGATACATTCACGAG	15.8128	13.0397	Evolution (V)
vaishnav_14838	TTGAACTTTCTTTTTCTTACCGTTTTCAGGGCGCTTTTTCATTTCGGTGTTTCATGGACACACATGAAGTGAAATGTCGC	16.618	14.1622	Evolution (V)
vaishnav_9773	ACCATACTTCCACCGAACTGAGTCATGGGATACGGCGGGAATATAGCACCCACACTAGTGTTCTGTCAGATGGCATGCCG	17.0434	13.9974	Evolution (V)
vaishnav_2541	CAAAGCGCGCGCCGAGGCTATCAGCCAGTCTCTAAGGGACGAATTCTTGACTGTAGACAATCTTTCAATCGCCATCGTCG	15.4433	13.5704	Evolution (V)
vaishnav_9044	AAAAAAAAAAAAAAAGAATTCGCGCATGTGAAGTTTTATTATCGTACGCGTTATTGTTTGCGCTAACATCGCACCGCATA	16.0549	15.6835	Evolution (V)
vaishnav_9662	AATTCTTCGGATTATTATTTAGATCGTGATTTTCTCTACTCAAACATTTCCTTGAACTTGTATAACGGGGAAATAAATCG	14.6564	12.6784	Evolution (V)
vaishnav_12768	GGAGATCTAGAGTTACTTATTGCCGGTCTATGCTACAGAGCCAGCCGATTGCTTTTTTTCACCTGCACACCCGTACATTT	16.0947	14.5278	Evolution (V)
vaishnav_5719	GGGTAATGAGAAAATCCGCCCCGCTTGAGAAAAATTTTTTCGCAGATTCATTAAAACCTTGCGAGTTCTGCTGTCTTGTT	17.3218	15.4864	Evolution (V)
vaishnav_14109	TCGGTACTTGCCGGGTAAGCCCGCACTATTAATCATATAATCCACTGGAGCTTTCGTCCTTGATTCGTCGGTACCCTATC	15.2343	14.6407	Evolution (V)
vaishnav_9117	AAAACAAGAAAGAAAGAAGAAGGAGGAAAAGAAGGTTATCAGGGTAAGTATATAGGCAGACAAAAAGGAAAATTAAGTGC	15.1764	13.6517	Evolution (V)
vaishnav_14381	TGGAAGGGGGCTGTTATCCAATCTTCCGAACTATATGGACTACGACGGCTTCTTGGTCGAAACTATCACTATTCACGGGG	15.1358	14.2765	Evolution (V)
vaishnav_10885	CCACACTAATGACATCCTCGCGTCGGCAAACTCGGATTTTCTAGTGAACGAGAATCTTCCCCCTGGCGGACCCATGTACG	16.2686	14.7892	Evolution (V)
vaishnav_6010	GTCAGGTCCAAGACCATGATTCGCGCTTGGGTCGTGCCCGCTGGTGCAACGCAAGGAAATTAATCACAGTCTACGGGAAC	16.455	13.6172	Evolution (V)
vaishnav_11101	CCGCGCGCGCATCCCTAACATTGCTTTTTCGCGGTGTCTTGGTTTGACCAATAGGAGAGGATCTTGAGAGATCGTGGGAC	16.2428	13.883	Evolution (V)
vaishnav_14881	TTGATCATTTGTATAATTCTTAAAATCTCTTGTTTTCTCCAATTGTAGTTGTAAAAGCCCTAAGTTTTCAGTAAATCACT	16.0617	14.244	Evolution (V)
vaishnav_13827	TCAATCGCTTGTTATTATAAATTGGCTTGATCACATGACACGTCGACGATATTTTTTTCTTGTTAGGGGCAAAAGTTGGT	16.1576	15.1006	Evolution (V)
vaishnav_9744	ACATATGCCAGACTAGTCTGAAACCGCGAACTTGCGGCCCCGGGTCCTTACTTCTAAAAAAATCTAAACCGCTCGCAGGG	15.9793	14.7034	Evolution (V)
vaishnav_1738	AGGGGTGGGTCCTATGCGGTAAATGTCGGAGGCACCTCGTGGTCCGTGATCAAACTGCTGCCGCTACTTCACGGAGCGAG	16.6447	15.9111	Evolution (V)
rb_4619678	GGGCGCGAGGTGCACTGATGCCGTTAGATAGTCCTTCTGCGGACGGGTATGTAGTATTCTTGGGTTGCCGAGGGAAGGGG	16.1734	15.434	Test Set
rb_1454648	TATACGTGGAGTCAATGGCCGTTACGAACACGGTCAACCCGTGCAATTCTTGGCGGGGAGGCGGCGTGGCGGCACTACAA	14.4913	12.8116	Test Set
rb_1956219	TTGCGATCGTAGTTTGCTTTTGTACTTTCTTACTTGCCGTTTTGCATTTCCTTACAGGACTCTCCTGGCTCGGTCTTACA	13.5691	13.2141	Test Set
rb_6278856	GAGAATGAACTTGATCTCGCGATATACGGCTGGTCAACATTCCCGAATCCCCCTTTTGATTTCCTGCACGTACCGATGCG	16.9125	14.8139	Test Set
rb_1262302	TGTGAGTCGGACATACCTTACTTATTACGGTTTCGTTTACAATTATGTTCCTTAAGTCCATTGTCGAGCAGAGTGCGTCG	14.8625	13.1971	Test Set
rb_5708238	GCAGACTAGGCTGTTGCAGTCGTGGCATGTCGGACCGAGATCCCCTTGGGTCGGGCTTCTCGTCCGCGCTCGGAGCATTA	14.7813	13.3981	Test Set
rb_4133531	GTGCGCGTGTGCGCAGACGCCACTGTCGTTGTAGACGATCAAATTGGGCAGTCAGGCTTGAACGGGGGGGGATCTTCTGA	17.9666	16.3732	Test Set
rb_260633	TTATGCGAGCATGTGTTCGGGGTACTTTTGACAGGCCGACGCGTGCAGCCCGCGGCCGTACGGTGTTCCGGTCCGGCTAA	16.6852	15.5247	Test Set
rb_6225490	TGCTACGTTATAACTCCTTGAGCAGTTCGCGTCTCGGGCAGAGTCTGTTGTCGGGGGTAAGCTAACCTCGGCGTACGGGG	15.4964	14.0949	Test Set
rb_7011368	GGTAATCCACAAATCTGCGGGCGATCGTTGCCGAGGTGCAGCACTGGAGGGACGCACTCCTTGGCTGGGCCTTGTCGGAA	15.7007	14.2652	Test Set
rb_400147	GTTTTTGCCTTATAGTATTTAGGGTTCTGTAGGGCGCTTCGATTTTGGTCGGCGCCACCCGGCGTCCGGCGAAACGTTAT	15.9557	13.9073	Test Set
rb_426857	CCCGCAAAGCGGATTATCCGTCGCTCACTCGGTTATCCTGTTCATGTCGTTAAAACGTTTCGTCTAATTTCCTAGGCCAC	15.4008	12.6596	Test Set
rb_4057259	CCTTAGAATATTGCATATGCAGCGAAGAATTGTGTTATTGCCGGCGAGTTGAGTTGGTGTGGAACTCGTTTGCGACGAGG	12.8601	13.4238	Test Set
rb_5111882	TCGAGTGGAGGCATGCGGCGGTACCCGTGTGGTGCTATGGTGTAGTATGTTTCCGTGTTTGGTGAGCGCGGGGATAGCTC	14.8422	14.2227	Test Set
rb_3802125	TCGCGTTTGGCGGTCCCTTTTGCCGGTGAAGGCGGATGGGGCCAAAAGGTATCCGTCGCGGGTTTGACGGCTTCGAGGGG	17.4098	16.4568	Test Set
rb_4860723	GCGTTATTTGTGGCATTGCTGTCAGGTATGTGCGGGTTAGCATCCCAGAGGGTGTGGATTTGGGGCACGTTGAGACGCAC	15.9853	14.2967	Test Set
rb_4149154	TCGTAGGTCGGTTTTCTAGTCATCACATTTCGTCCGCTCATTCTGCCGTCGTACGTCGTAATAGGGAGCGGGGACGGTGT	15.1717	13.8346	Test Set
rb_2550676	GACGGGCGCGCTTCGTCTTCGTGCAGTCTCGTTCTACTAAGTCGGGGGCGTCCGTGCGTCTTAGGCTGTGTGGTCTGTTT	16.7846	14.5485	Test Set
rb_1687000	TCGGTTTGTCTATGTTTTAACCTGATAACGCAATCGTTTCCGCGGGGCGTCGGGGGGACCTCTGTTTTCTATGACCTTTG	14.4781	13.6366	Test Set
rb_5151547	AATCCGATCAAGTAGAATGCGTCATGGTTTGCGGGGGCGACAATCTCGGCCAAAGAAGTTGCTAGCCGGTCGCAACATGA	13.9291	12.7776	Test Set
rb_3588082	TGGGATGTTTGGTTTCTTGGCGAAAGTCGGGGCGACTACCCGAGTCACGACGTACGGGGTCAGCGAAAGATTCACACGTA	17.1955	16.317	Test Set
rb_2743553	CGGGCCAAGTTGAGCGTCGGTCACGAGAGCCCCGTCGTAGAGGGTCGCATGCACACGGGTGCTGGAAAGTCGAGATGGCA	16.8202	15.0712	Test Set
rb_673201	CAGGTATTTGGGTGCCAAATACGGGTGTTGCTTCGGAGGTGGTCTATGGCCCCGTGCCCAGGGGCGTTGGGGGGTTGCCC	15.5298	14.738	Test Set
rb_1320311	TGCACTGCTGCACGAGGTCTCGAGAGCGGGGAGGTAAGGGCCGGGCAATGTTATAATACATTCGCCGGCCAATGCGCGTC	16.2336	15.3558	Test Set
rb_2759716	ATAATGCTTAACATTTACGTATTTTTTTTACGAAGTGGTCGGTTTTCTACGTAGACCGAATTTTTTATCGTCGATTTGCG	15.55	14.2938	Test Set
rb_3355686	TGGGAGTCTACGAGAATGGCCGGCTGCCAGCCTGTAAAACGGGACAGGTCGCTCCCGAAACGAGTTGTGCAGGGAGGGAG	15.3295	13.9097	Test Set
rb_3777631	TCTTGAAAACTCGCGTGGCGGGAGAGCCGGGATCGAACGTGCTGCGCGTCGCGCTCAGGTTGACGCCTTGTCGGTAGTTT	17.7135	15.5573	Test Set
rb_5702292	TAGGCCGTCATTATTGTTGATGCTGACTTCAGGGTCACGCCGCCGTATGTTTGTATTAACGGAGGTAGCTACGGAGACCA	13.6651	13.5265	Test Set
rb_1555814	CGTGGTAAACTGTGTGCGCGGAAATTGTGGATTCGCGGCATGTATAACCAAGACATCGCGACTACGGTCGTGGGCTGATG	14.7934	12.8751	Test Set
rb_3115146	ATTGACCCCTAAGGCGATTTCATTTGACTGACGTCGCTCATGAGCAGGGTTTCGCGACCGCGCCGCGGCCAACTGAACCA	15.6377	12.8365	Test Set
rb_4050020	TGAGTGCCGTCAGGCGGGTAACATCCGGATGGTGTGACGAGTTCCGAAACAACGGGGGTTGCCATGGGAAAGGGCGTCCA	18.0283	17.4233	Test Set
rb_644056	CCCATCGGGCAGTTGTAATCGTCCCTTTGGGCTTAAACCTGGAGCGCTCTGCGGGACAAGGTGGCAAAGCGGTCACCACG	13.9889	12.353	Test Set
rb_1248856	TTCGCGCGTCATATTTTTTCGGGGTTGTTTGACGAGAGTAGTGTGTCGCGTGCAGGCATACTTTCGATCCCGCTAACGGA	16.2218	15.5937	Test Set
rb_2978073	GGTGAGTGCGAGGATTATGGGCGCGCGGCTTAATAGTAAGGGTCTGCTCGGGCCAGTCTCGTGTCACGAGTGCTGCCTCC	16.0944	13.8251	Test Set
rb_177101	AGTCGCGAGTTACCGACCCCTGGCGCTAGTGATAGGTAAACGGTAACCCAGCGCGCCTCTTAACTCGTACCGACGTACGG	15.5234	14.0064	Test Set
rb_5918647	GGTGAGATGCCGGGCAGGCCAGACTACGCGGAGGAGTAGTACCGGAGTATGGCCCCTGGGTGATAGAGGAGCGTGCGGCA	15.2226	14.0778	Test Set
rb_2285639	TCGGCGCGCTTGGAGGCGAGTTTATATTTTCCGCCGTTGGGATCCGGCGGTGGGTTATCGGTTCTATATCCGGCTAATTC	17.6038	15.2929	Test Set
rb_13580	TCTTGTAACGGGTTGAGGTTCACCCTACGGGAATTTGAGTTGGTGAGGGGTCATTTCCGATTTTTTGAGTTGTGGGCTTC	15.6554	15.7333	Test Set
rb_5547699	TCTTTGTGGAAACGGTCACCGTCGAGCTCGTACACAATGCAGTAGGAGATGGTGGCCGAGCGGGTCGCACGAGTGTTCGC	15.8118	13.5469	Test Set
rb_1879935	GGGGAATGGGTGAAAGGCGGCGGTGAGGATTCCGCGGTGTGAATGGGAAGGAGCCTGGGTCGTGCTGAGCGAAGTCGCGT	17.8065	15.4738	Test Set
rb_3338818	TATGTAGGCGCGAATTGAACCCCAGGCTCTGCTGTGACCATGGAGAACTCCCTCGCACGTCTCGCGGTGCCAACGTGTCG	14.7134	12.4395	Test Set
rb_2027739	GACATGTCAGACTCCGACCCGGTGGGGCGTGAGATAATGGCGCTTCCCCTTATGATGGATGCGAGGAATCGGGGGGCGTA	13.6106	13.966	Test Set
rb_3981102	TTGCATGTCCGTGTTGGGAGATTCGGAGATATGTGAGGCCAATATGGCAGTGAGCCGGGCGAGTTGAACTGCGGGGGCGT	13.4864	13.2763	Test Set
rb_6471696	TCTCGTTCGCCGCGAGGGCGAAAGACGGAGGTTCTATGTGGATGGAATTCCGGAGGGGGGCGTAAGTGGCACGGAAGGAA	16.5693	15.4227	Test Set
rb_1349491	GGATGCGCTAACAATCGCGATCTTAACGGCATCGTGTTGTGCATTGAGGCCGGACGTGTGACCTTAGGGGGGGAGAGCAG	14.3414	14.5892	Test Set
rb_5236088	CCTGGATTTCCGGCATGCAAGCAATGCGCTTGCGGGCAACACCGTGTCACGCCGGGTGTGCGCCCGTGTCCCCGTGGTCG	17.8164	16.0564	Test Set
rb_653833	ATGTGACTGAGAATTTCGTTGAAGATGCTAACGCCGGCCAGCCTCGAACTCGCAGTTCGGTCGAAGGGTGCACTTAGGAC	17.7955	15.5661	Test Set
rb_4799947	GCGTTAGTTGCAATGATGTAACCGCCGCGCCGCAGGGCATACCGTTTCGAGCTTTTGAAAGGGGTATGGCTTCAGGCTCT	14.5045	12.5678	Test Set
rb_976113	AGCAGAACGCGAAGAATCTTTTTACATGTATTTGGGGGCGTGGTTCAGACTTATGAGACGCGCGCCGGAGCATGAAGTCA	15.1267	12.535	Test Set
rb_901604	GCGGTGTGGTTTCAGAAGCGGACGGCCACCCGGGCGCTGGGTCGCGGAGGATCGAGTGGCGGTGTGAGTATCAGGAGGGA	18.0429	15.9708	Test Set
rb_2108689	GTTGCGTGCGACGGTAGTGCGAGCCCAAACGATGTACGCGGGGTCAGGCCTCCGCTTCGCTATCCAGGAGCGGGAGTTAG	16.9674	15.648	Test Set
rb_2721230	TACTCGTCTGTGGGGTGTGAGTGAACTGCGTAGGGATCCCGGCTGGGAGGCGACTTCCGCGACGTCGCTCACGCTGATGG	14.7852	13.4346	Test Set
rb_6384681	GCGCTGGCCACGCCTCATCCGCTGGGATCGAACCGGTTATCACCCCTGTGGCTTCCGCGCGTAGGAGATGGTGGCGTGGG	16.1497	14.6096	Test Set
rb_5383248	ATGCAGACGGACTGGGCATGAGTTATGTTGTATAGTGCGGAGGGGCTACTGGCGGGGCGACAGAATTGTATGGGTGTTCT	14.3639	14.2683	Test Set
rb_6611151	CGAGTAACGCACCTAGAAGAATTGAAACTCGGGCGCTCTACAGCGAACACCCACCCGCAGCGGTCCTGGGTCCCACCGAG	15.4241	14.5314	Test Set
rb_4182635	TCGGTCGGGTAGCTGTGCACGACGCTCGAGATAGGACATGCTTGTATTGTGGCTACGGTTGCTTGGCGGAGGGGTCGGTC	14.3955	12.8316	Test Set
rb_2357773	TCTCGCGCGTGTCCCATTAGCAGGGGTCCATGGGAGTGCAAGGAGGGGGTGGAAAGGGGGACACGTTGCCAACGCCGGGA	14.8124	15.4368	Test Set
rb_6112996	GATGAAGCGCAGAAAAGATAGCGTTTGGGTCTAGGAGAATACCCGGACTTACTCGATCGGAGTGGGAGCGACGGCATTGG	16.4969	14.2221	Test Set
rb_906259	TATCAAAGCCGTTCTCCCCTATTTTATCGCCCGCCAATCAGTTTACGGGATAACATGGCCGCACCAAGTACATACAGGCG	14.8291	14.263	Test Set
rb_6832486	TCGTAGGGGTAGGCATGCACGCGTCGGAGTCATGGTTTTAATGTTTAGTCGGTCTCTCAACGCATGACCTCAAAGCAGGA	13.9921	12.9102	Test Set
rb_3876614	TATTTTTACAGCAGCCATTAGTGGAGACGGGGAACGTTTTGAATTTTTTCGTCGCCGGCTCGCCTTGAGCGTTTGGCGAT	16.1634	13.0578	Test Set
rb_625266	CTTGGGCGTTCGCTTTGGGGACCCCGGTGCCAGCCTCCGGTTGGAGGCGTTCTATCAGACCGCTTTCAGTTCCGCGAGTA	16.0689	15.0743	Test Set
rb_2681587	GTGCAGGCCTTTGGTGTGGCGCGGGATAGTGAGCGTCATTGGGGGTTGCCTGTGCTAAGCCTCGACGTCGTCCTATGGTG	13.6496	13.2142	Test Set
rb_4141924	GGATAACGTTCATCGCTTCGGTCCGGCAGGGGGGCGGGTTTACGTCTCATGCCTAGTTTTTAAGTACCCGGTTGCGCCCT	16.412	14.9743	Test Set
rb_1151429	TTGTTTCACGCTCAGCCCCTGTCTCGGCCCTGAGACTCTACTGGCCGGGACCCCGCAGCTGCGCTCGGTATGGAGTCTTC	16.3678	15.5817	Test Set
rb_7248134	GTTCTTATGTAGGTAGCGGGCATACAATGATCGTGCGGGGTGTCCTTTGTTGGTGGGGAGTGCGGGCGGCGTAACAGCAC	15.2093	13.9186	Test Set
rb_5130489	GAAGGGGCAGTAAGGCTGTAGTGGTGTACGCGCGCGGGTGTGGCTGTATGGGTGGTCGGATATTGAAGGTGGGGGTGTGA	15.709	15.0177	Test Set
rb_5216628	GGAAGTTGGAGCCCGCACTCTCGGAGTATGTAGGATAGTGTTAGCTCGGCAGTGAGGTTTTCGACGAAGGTGACTGCTGG	14.3383	13.6371	Test Set
rb_1245749	TCATTAAGTTCCGAATCGCAGAAATTTGAGCAAGAGGAAAAACGAGCCCCGAGAAGTTCGTAATAGGGTATCTTTATTTA	15.2829	13.7938	Test Set
rb_4891096	TGAGTCGGTCTTTCAAACCACGTACCCCGTGTGGTCGGGGTGGCATATCTGACCGGTTGGTCCGTTGGTCGACATGCATG	15.2875	14.0243	Test Set
rb_2017764	GGGGGCGAGGCTATGGAGCCACAGTGGCCTTACCAGCGTTCGCACGACCGTAATTCGGCAAATGGGGCAGGTGTATGAGA	14.814	12.6523	Test Set
rb_7118290	GGTTATAACCAGTCGTATGCCGGCGGGGGGTCAAAAGTCCGCTGAACTAGGGGCCCACGGGACGCGTTTGCGGTTTGAGG	14.9025	14.1696	Test Set
rb_4351226	TGCATGCCGGTCCCGCACTCTACGTTCGCGGCGGGAAATTAAGCGATGGTTAGCCGGGGGCTGAGGGTAGCTGCGCGCAG	16.0301	15.1005	Test Set
rb_4788621	TTCGGGTTTTATCGTTACCTACGGTGTTCCCTGCGGGCCATCATAATGTATTTGATGGGGTTATCAGTCTTGTTAGTATA	15.3563	13.1883	Test Set
rb_1180214	TCACTATCAGTAGTATGGTTGCTAGCCCGGTGTGTAGTCGAGTCGGACGGGGGCCGAGGTGGAAGCCGAAGCACGGGGCA	15.3962	13.9398	Test Set
rb_7141427	CGTTAGTGCCGGTCGGCGTAATACCCAATTCGGGTTTTTTTTGGGTGTTTGGGCTTTTGGACCTTTAGCCACCGGGGTTA	17.3639	15.6159	Test Set
rb_2858841	CCTTGACCTTTGAGAATCGTTAGGGGATGCGAGAGGAGAGGCAGGGTTTTAAAGTGTCGGGTGGGGACGGGCGCGCTGCA	13.9172	13.7002	Test Set
rb_2472755	CATTTGCGAGAGGTCACACACGGGCGTTGTTTGGCGTGTTTGGGTCCTCTTGAGGGCTGAAAGACTCGGGCGGCGCAGGA	15.6337	14.4806	Test Set
rb_3791820	TGTCTCTGCGAGGCATGGTGGGCCGTTGCGGGCGGGGACGGGCGACAGCGTGAAGCGCATATGTTAGGGTTGCAAGTGTG	15.8476	14.1914	Test Set
rb_4502282	CGTTTGCGGCTGTGTCAGTTCGGTGGCTTAGCGAAAGCCAGTGGCCAGTACCATAAACGGCTTCGGGGGGATGAGATCGG	14.3244	13.2649	Test Set
rb_669067	GAGGGGCCATAGGGCGAGTGGCGTGGTAACCCGCGTAGAGTGACCGTGCGGGAAGGGTGACGAGCTGTCGGTCTTCGTGG	17.1964	15.5851	Test Set
rb_5876817	CAAGGGCCCACCCGAACACTTCGGTCGTCAGTTGTGATTGTTCTTAACTTTTATTCGGCGGGAAGCGCGTCGCCACACGG	16.2182	14.4157	Test Set
rb_2391216	GCCCGGTGCTTTCGCCTTGTGGCAACTAGACTAGGTTCCAGCGTTTCTCTGTTTCAGATTCGAGGGGGTCCGCCCGTGCT	15.6694	13.9788	Test Set
rb_1005542	TTGCTCCTTTATGGAAACGGATGCCGTGGGCGTTTTTGCATGTCGGTGGCGTTCCCGGGGTGGCTGACGCGGCAGGGGCA	15.928	14.396	Test Set
rb_3202081	CCCCGTGAGGCGCGTCGGCGGGGGGAGGGGCGTGGGTAGGAAAGATAACTGGGGACACGTAGTAGTGAGCTGAATCGTCC	15.3283	12.7007	Test Set
rb_6000620	ATGATCTACGGCGGCTCGGCCTGGCAGCATAATTGAATTATGCGCTCTATTGGTGTTTCATAGATATCAAATAGCGTTTC	17.1261	15.039	Test Set
rb_1847615	TCTATCTTTTTAGTTTTCTTCGTATTTTTCTCGCATTTTGTCGTACAGACATCACGGTGACTTCTGCTAGCCAACGCACG	15.4791	13.8512	Test Set
rb_7203757	AGGTCGCCGTCGCTAGCTTCGCGGCGTTTACTACTTCTTCGTGAACCACCGCATGTCTACATACTAAAAAACATCAGGTC	14.8881	13.0752	Test Set
rb_1336639	TAGAGCCGGTCACCCCTCGACGGCAGGCTGCCCATATATCGCATTTGCAGGAGGGCGTCGCCGGTTCGGTATAAGGTCTG	15.125	14.4826	Test Set
rb_2599760	CTTTGGGGTGTAGGTGGGGGGAATGGCGGCCGGGCTTCCACAGACCCTGCTCGTGAGTGGGTGAGCGCGTCCCCGGTGCA	15.1155	13.9018	Test Set
rb_5500916	TCAGTCAGCTCGGCTGGTTGCATTATCCCCGAGGTGCGGGGGTACGGACGGTAAGCAGTCCGGTCTCGGCGCACTGACTA	17.4935	15.4136	Test Set
rb_6185803	GTTGGCGGTCGCTAAGATGGAGGACGCGAGGTGTATCACCGCGGTGTGGGCGGGGTCGATCGGGTTGGCGACAGTGCGCC	18.0747	14.9488	Test Set
rb_1648615	TCGATGTGTTACCTGATCTGGGTCCCGGTCGGCGGGGCGGCGTTGTATGGCACCGTGCGGACGAGGCGGGTTCTGCTGAT	16.4843	14.0444	Test Set
rb_6351290	TCAACAGTATGGCGGTCTAAAGAAATTTTCCGTGTGAACCAAAGAAAAGGCCGGTGTGCGACGTAGCGGCTTGCAATCGA	16.1741	13.8981	Test Set
rb_1891048	TCATCTCCATCCCCCGCCATAGGCCGAGGTGCAAACGCGAAATGAGTGGCGTCGTTGGTCACGAGCAATAGCAGAGGATA	16.374	14.2152	Test Set
rb_5520553	TCCGATAGTAGTGAGGCCCCGTTGGCCGGAGCAGGGGCTACCGGGTATATATGAAAGGCCAGCCTTCGTGCCCGACGGAT	15.8742	16.46	Test Set
rb_4057188	CGATGGAGAACGATGTGGGGAGTAGTATCACGGCACGCTAAATACCGGCGCCTTTACGGGCGGCCACGGCGCATAGTCAG	14.2353	13.3432	Test Set
rb_880894	TACGCGTGTAGCTAGTTACTTGCGGGTAAACAGTGGCTAAGGGAGAGAGAGTCGAGGCGTCGGCAATCGGTGGGCTGCGA	16.3538	14.6551	Test Set
rb_5272337	TTCTCGTCAGCACGGTTTGTCACCCAGCAATGTTCCCGAAGACGATAGCTGGTAAGCGGAGCCTGGTCGGGGCGTCTTTT	14.8591	13.6773	Test Set
rb_1488941	GATCCCCGACATTATCTCTGTACGGAATGAAAGAGTGCGCTTGAAAAGAGGAAAGACCGGAGAGTCTGTCATTCTATGGG	14.7774	13.2846	Test Set
rb_1815144	TCGTGCCGGGTTCATCTACCCGTGTCATTAATGGGCCAAGCACAGATGGGTTTCGGCCCAAGAGACGGAATATGGTGTTG	15.1321	13.1357	Test Set
rb_4131854	CATGATTTTCTATAGAAACTCACGCCACCGTCGATGTCACCCGCGCATCAGATCCTTTTTTAATATTTCCGCAGACCCCA	14.344	13.727	Test Set
rb_6398678	TGCCGGTATCATGATTACCCTACTTAAGTCATTTGTTCAATTTTCTAGTGCAATCTTTCGGAGTCGAACAAATAATTTGG	17.5306	14.0784	Test Set
rb_7306075	TGAATTCGCTAAACCTCGTAATCGTGCGTTTCGAGTGAGCTCCGCGCTAGCTTCGGCGCGGCAATTATTGGTTATGCCGG	14.3194	12.9314	Test Set
rb_2150833	TCGATGCATTAAATTGTCGCGCCTTCATCTTGACTATGCGGCAGCGTGTAGATGAGCCGTCCATTCAGGGCACCGGACTA	13.3579	12.3283	Test Set
rb_4788774	TCTGACAGTTGAATAGGGTTTCTATGGGCGCGGACCTAATCGCCAGTTGTGAGCGCTTAGGCCGTGGTGGGAGCCCGTCC	14.6802	13.6537	Test Set
rb_3095434	ACCTTCTCTATAATCGCGCCGGGTTTCGGAACTTGGAAAGATGAAATGAGTAATTAGGGACCTTAGTACCCAGAGCGCGT	13.63	11.4715	Test Set
rb_1915918	GTGATTCTGGTAAAGTCCGAAGGAGCCTGCGGCAGGAAAGGGTCGGCGGGTTACCTGCAAAGGGGCAACTCTGCGTAGAG	14.8072	15.4734	Test Set
rb_3678491	GCGAGAAACACGGTGATGGCGATTCCTAGAAGGGCTGCGCAGAATCTTGGGAGAGGGGCTGGTATGTTGAGAGCTATGGT	13.7359	12.3437	Test Set
rb_2615485	GGTAGGTTTGGTCCGCCTGGATCGTTACCATGGGAGGAATTCCCGGGCCGGGGGGACATCTCAATGCGGACAGCATGGTG	14.8206	13.7791	Test Set
rb_1222936	GTAGGGAGAGACGAGGTAACTTGCTATCCATTGTAGACCTTCGTCGGGCCGACGTCACGTCGCTCTGGTCGGGCCACTGG	16.1395	13.1911	Test Set
rb_6356156	TCGAGCGCGAGGCACATGGGTTTGCCTTTCGAGCTGAGGAGGGGTTTCTGAGAGGCTTATTGGTTACGTGAGTGGCAAAG	13.1976	12.6963	Test Set
rb_320955	AGACTTTCACGTCAGGCGCCGGGTAAATATAGTTTTAGAAATGGTGATTGGGCCTGTTTCCGGTTGCGGACACTACCGTA	17.0337	14.7013	Test Set
rb_6920034	TCTCGCCTTTAGGCGTTTGGTTGGTGAGGAAGGTATTGGGCCCGCGCGTTTTTTTCGTCGCTAGAGTTTTTGCGCGGTTT	17.3528	14.2995	Test Set
rb_4026278	TATGTAAACAAATGAGCTGGACTGGGTAACCCGGATTGACGGGGCGGGGCCTGACTTTGTAATCGGGGTCCGGTGATTGC	18.6113	16.2817	Test Set
rb_1889811	TGCTGGGCATTAGGGTAACGCAAATTTGCTAATAATTTATTACGTGCAGTTTAACGCATGACTTCTCTACTGGTAAACGA	14.571	13.6093	Test Set
rb_6003572	CCGCGCCTGTAGTGAAAATATAGGTTGCCGGTGGTCGCCAGGGCGGACACATAACGATTAGGTGCTAGACCGTGGGGCCG	16.1734	14.5289	Test Set
rb_4090607	CTTCGGTGGGTATTCTCTGGTGGTTGTTTTGTGGGCCCGTAAAACATGAGCGCTTTGCAAGGCAACTCGGGGATTCGACG	16.3127	14.3231	Test Set
rb_5329221	TATGTCTTGAGTAACCCAGGGGTTCGATGGGTGTGCGGTGGCGACGCTGTAGTGCTGCGGGTCTCCGGGTTAGCGTGACG	14.8329	14.249	Test Set
rb_6207090	ACCGCGTAAGTCAACTGGCGGTGGGCTCCCCCCTTGGAGACAGGCATGGGAGTCCGCTGCTGACACTGACGGCGCAGTCA	15.4911	14.1096	Test Set
rb_5033916	CGGGTTTGACCCGGCGCCATTAAGGGTGCATGATCTCCGTGAGTTTTTGCGCGATAGGCTCTGGCAATGCGGTGGCTGCG	15.713	15.1258	Test Set
rb_5162260	GGGGCGGGTGCATTTTTGTCCGCTTGCGTAGCTGGCTTCTACGTTCGGCGTAAGGAGGTCTAAGACGGGGATTTGCTATG	16.014	13.9148	Test Set
rb_5354930	AAGGGCGCGTGTGTTCAGCGTAGACCTGGGCGTCGTGGGTCGGCCAGCTCGGATGGAACTTTATACGGCCTTGGTGCGTA	16.0428	14.7236	Test Set
rb_180719	GCGGAGTTAGGACAACAGTGAGGGCCGGTGCGTCATCTTTTGGGTGACAGATATGACGGGGTCGCCTTATCCCCCCGTGT	14.4156	15.0014	Test Set
rb_4841039	TTGAGCCGTGGAGCAAAATGGTCTACGTGGCGGTGCCGTGCGCGTTAGGCCGGTGCCTGGCGCGAAGACTGGGGTTCCTC	15.1563	14.1879	Test Set
rb_2347920	GCCGACAAACAGATTCGGGTTGACCGATAAGCACCCCGGCCGGGGGAGCGCGGCACATTAGGTGGTGATACTGCTGGCGA	15.2829	13.6524	Test Set
rb_2461285	GTTACGGTTCGTGGGACGTAATGCACTAGATACCGAGAACGAGTATGGGTGGGCAATTTTTCAGGTGCAGCGTCCGGGTG	14.4882	13.5958	Test Set
rb_2298607	TCTTTGGCCGGATGATCTCATGGTAGGCGTGAGATTCGTACGGACACTAGCGTGGGGTAACAGGACGTCGACGCGGTTCT	15.0688	13.7372	Test Set
rb_4802995	TCGGTTCCGGGAGGTCACGCTAAACTAAGCGCGCGATCAGTGGTTGGCCTATGTTATATGGACCGTGACGGGTAGTGGAC	15.2963	14.4769	Test Set
rb_5009937	TTGCCTGTTGATGGTTTTGGCCGTTCGTCTCCACGTAGGTACTCAAAGTGTACGGATGTACGGTAGTGGTAGTATATCGA	15.5987	14.8659	Test Set
rb_3391103	CCTGCCGTGCCGAATAGTTTCACATCAAGGGGAAATTAGATTCTTCCGCGGTGGTAGGGTTGATTTCCTGACCTTTGGGG	14.892	14.4657	Test Set
rb_1478700	CTTGGGAGAGCGCGGTTGAAGCGAGGTGCGGGTCAGTATCCCTGCTGCGGGTGGCGGGGCTGGCCCATCAGCGGTGCGGT	17.3811	15.8701	Test Set
rb_7062682	GATCCAAGCATAGTGGGCCCATTTTTTCAGCAGCCATGATGTTACCCGGGCCACGTCTCGTTGCTCGATATAGTTGCGGA	17.3463	15.4333	Test Set
rb_214190	CTCTTGCACAGTTCGCGCTTGGTGCGGGTCAGCAGTCGGTAAGTGGCAAAACGCGCCGTCCGACCGTGGTGTGTGGGGTG	17.0018	15.4482	Test Set
rb_196008	CATGTGGGGCACTATGGCACGTAAGGGACGGGGCCGGGGTTTAAGACGTGAGCGGGGCGATTCTCACGTGGTGGTGCGAA	14.7338	13.517	Test Set
rb_2157767	GTTGAAGTAAGCGAGACCTCGACCTACCTAGGATCTCCTTAGCGGGAGCCGTGTAGAAAGTTTCTACTCCTCGTGTCGCG	14.7649	12.7406	Test Set
rb_5100814	GCCTGGTGACGATGTCCGGACTTAGCGTAGAAGCATTGCCTCAACAGTAGTTTCGCCTCAACGACTAGCGGTGTCGTTCG	13.9063	12.1631	Test Set
rb_6924281	TGTACGCTTCCGTTCAGGGAGCGTGAAACCGGATAATATGTGATAGGTGGCTAGCCTCCAGACGTGGGGCGTCGGCGCTC	14.7766	13.3406	Test Set
rb_4491943	CATATTTTGTTTACCAGGAGCCTACGTGTCGGTGTTTTCCTCGTAGTCGTTACAGACGAGCCTTCGGATGCTAATTTGGG	14.3718	13.2526	Test Set
rb_6501784	AGCCCGTCCTGTTCCGTGTTTCTGGGCGTTCGTAGTGTGTGGCTTTTGACTGTGGTACTTTTTTGGGTCCAGTTTCAGGG	13.9356	14.4573	Test Set
rb_3926542	TACTGGGCTGATAAGCCACCCCGTCCTTAATGCCGCCTGAGGGACTTACAGCTTAAGTCACCCGCAGCGACGGTGGGTAG	16.0146	14.358	Test Set
rb_5445172	TCAGTTACTGAGCGCAATGAATCGGATGACGCGCGGGGACTAGGCGACGTGAGGTGGGCGCACGCGCCGTTCGGAGAGCT	17.2413	14.6384	Test Set
rb_6867194	AAATTTACGGGTTGAACATGGCGACGGGGTCGGCGTCCACGACCTCTGCGTTTCGAAATACGGTCTTGGGTGGACCAGGA	15.743	14.6548	Test Set
rb_3099401	GTAAGGACTGAGAGGTAGGCGTGCGCTGTTGGAGTCAATTGATGACGTTCACGGTGGTAGAGCGGCGCGGCCCCTTTTCG	13.888	12.5532	Test Set
rb_7212811	CCCAAGGGCAGGCCGGGTGCGAGGACGCGTTTAGGGACTGTATTTTTGACCCGTACTGTGTTTTCCGTTTAGTATAGGTA	15.0464	14.1785	Test Set
rb_4279906	GATCAGGCTTCAAGGATTAGTGCCTCGGAAAATTATTTTGCGAGGACCGAAGAGCTACCGCGAAGGACCGCGCAGACATG	15.6347	13.4629	Test Set
rb_6930606	ATCCTGTTAGGCAGTGCTGACTTTTTAATGTAGGGTGTATGGATGTGACAACGTACAATGGGTACCCGAAGCCACGAGAA	16.1404	14.1997	Test Set
rb_582780	GAAACGGGCGCCAAGAGTTGCGTCGGCCATCGACTGGTCCCGCGGTCACGGGGCGAGAGGAGGTCGGCGATCGCCGGAGA	18.5926	16.4525	Test Set
rb_5845873	GTCGGTTTGCTCTGGTGACTGCCGGTAGAGGTAAGGGCCGGAGGGTGTGTGGGTTGCTTGTTCCTGTAAAGGCCGGAGTT	16.3804	14.2335	Test Set
rb_1979619	GTTGCCCGTGGTGTCTTGAAAAGTGGTTGAGTGCCGAAGGGCACGATGCGGGTGCCCAGTCTGGGGCCTGCTGAGCTTGA	15.4571	13.5612	Test Set
rb_1553285	GTATGGAACGGGACATTTGATTGGCGGTGAGATAATTAATCGGTCACGTACGAACCGCGGTGCTTGCCCCCAGCCTCGAG	15.2955	13.8275	Test Set
rb_4085924	GTCCCGGTCGCCTGCGTCAGGGTAGTGTGGCCCTTATTGCCGTCGTAGATTATCTCGCGCCACGTTCGAGGCAGTGGAAA	15.9034	14.6875	Test Set
rb_2989753	AGGTAATAGTTTAGTAATGTGGTTTGTGGTGCACGAGCGGGGGAGGCGGGGGAACGATGACGCTGCGAAATGGTGGGGCG	16.5193	13.7151	Test Set
rb_1746598	TTTCTATGAGGCTTCCCAGTCCGGCAATAGGCGCCTGCGCCGTTGACGGACCCGAACCCAGCTGTATGCGTGAGCCGGGG	14.9062	13.967	Test Set
rb_6344184	AGCTCCCGGGATCGGGAAACGGTCTAATTACGCATACATAGGGGATCTGGTGGTCGGTCCACAGGTTCGGCGCGAGGCAC	14.1639	12.3176	Test Set
rb_5386717	TCTTTGCTCTAACGGTATGGAAAATCGCCGAGCATACATATTTAAGTCAGGGAGTAAGCCGAAAATTAAAGCGAGCATGG	15.229	13.896	Test Set
rb_693296	GACAAAACATGTTGTCGGCTTAGGCGGAGTCCATTGCGCAGTCGGCGATCGCGTTTCAAGCTAGCTGGTCGTGAGAGGGG	15.6461	14.7569	Test Set
rb_3297243	ACCCGCCGGGAACGGACTTCTGCGGAATATGGGTCGGATATAGCCTTTACAAAATGGAGCAGGGGGGTCTAAAAAGGAGT	15.0723	14.3833	Test Set
rb_1872504	AATGCCTATTTGCGCGACGTAAATGCGTGGGCGATGGCGCCGAAGGCTGGCCAACACTGAGGCGGTCAGTACCGTCGGTT	16.6681	14.3642	Test Set
rb_25334	TCCAAGCAGTAATTTGAGGACGTCGGTGTGCGGTGGGTGGTGATACCTTCATCGCGAGGGAGGATTGCATGTTTTGGGCG	13.7978	12.6342	Test Set
rb_507132	GGGTTATGTTTGGGGGTGCACGCGTCGGGTCTCAGTTTAATAGATTCCTCTCAGCGTACGGTAGGGTTCTGGTTCGCACT	15.6125	13.2077	Test Set
rb_4294097	TCTAGTCCTGAGTTCCCCGCGTGCGCTATCCTTTCGCCACTGAAATGTCGTTCCCCCAAGAGTCGGTCAGCTCAAGTGGA	14.4594	13.2044	Test Set
rb_7466401	GGGTGGCTGCGCAGTCAATGGGGTTACTCCCTGTGGTCCCGATGGCGTAGCTACTTACCGGCCAAGGCCCGTCGAGTGCG	14.2009	14.1145	Test Set
rb_665553	GTCCACGCCAACACATGTCCATGAATAGCGTCGCCGAAGCAGGGTAAAAAGAGTGGTGCATAATGCGGGAATGCGGTCGA	13.437	13.0723	Test Set
rb_7310231	CGATAACGTACTTCGGAGTTCAATCGGATGTTGAAGGCACGGGGCCGACCGGTCGGGTTAGGTCGTCGTCGCAGGGCCGA	15.4403	14.7886	Test Set
rb_4426348	GTTTTGTTGAATCACGCGTATCGTTTCACTTTTGAGGCTTTATATCGCGTGGACAGACGGCCCGATATGATGTGGCCAGG	14.5673	14.4269	Test Set
rb_500784	ACACGGTGGCATGTGTTGCCTCGTAGGGTGTATTGGTGGACACGATGGCGTGATAATCGGGAGGTATTGCGGGCTCTAAA	14.3282	14.4992	Test Set
rb_2391237	TCCTGGTGCGACGTCGGAAAAGCGTCGTGGTATGTATATCCGCCGCGGCCGTCACTCTCCTTTGTAATTGGTAGTCTGGG	14.9797	14.5731	Test Set
rb_554776	TGAGTTTTCGATCAGAGTAGACGCCAAGGCCTTCGGGGAGGTCGTCCCTAACACGGCCTGGAGGTGGCTCGCGTTTGTGC	14.6141	12.9265	Test Set
rb_109391	GTTTGTTGCCAACGTGGGTCTGCGGTAGCCGTTTGACGTGATTGCGCTCTGAGAATGGGTCGAGCGACCACGGAGTCTTG	16.327	14.8888	Test Set
rb_615735	GTCGCGAGTGTATGTTCGCGATGCGCGGGCGTGAGGTTGTGGGAGGGGTGGTGGCTCGTAGGCAGACCCGACATAGCACT	15.4602	13.9265	Test Set
rb_4162004	GGGTAACCTCACGATGATGCCGGTTTTGTAGCCTTTTATAGAAGGGATGAATCAGTTCATAAATAATAAAAAACGTTAAC	15.9246	13.2358	Test Set
rb_3884186	GTAGTTTACGAGTCACATAGGTTCCACGTTCCGGGTTCCCTGATAGACAATCCCGCCTAATTCAAGCGTTTTGGCCGGAC	15.7193	14.7563	Test Set
rb_6442967	TACTCTACGTGATTCTGGTCGATATGGTTTAGGCTGCGGTGTGAGTTTTGGTAGGGTAATATAACTGTCGGGACACGATA	14.3115	12.3231	Test Set
rb_2534686	TTGTGGCGCGAGGCAATCCCTGGAACGCAGGGTGCAGATGGACGATTTGGCCGACAGCTAGGCCGACGGTGGCCCTTCCC	16.6981	14.1732	Test Set
rb_3990123	CCCCGTTTTTGCTAGGGTGTGTTCCGCTTATTACTACGTGGGCTTTTCGCCAGGCAATCTGGTACCGGTACCGGGCGCGA	14.978	14.2342	Test Set
rb_3178393	CCTGGCGGTGCTAACTCTCCATGTTTCGCTCTAACAGATCGGCGCTGTTCGCATGACCGCCCTTCTTGCGCGCATTCCTG	14.469	13.6834	Test Set
rb_3706452	TGTACTACGAGCGGTAGTAGCGGTGCGCGAGTGAAATCTATCCTAGGATGCGGCCGGCAGTTTGACGTCGACTTAATTGG	14.8115	13.1746	Test Set
rb_740946	TTACCTGGGCAGGGTGTGTTTGCCACGAGGCCGGAGATCGGGTACGTGGGCCAGCGCGTTCTGTCTGTATTGCCGTGCGG	15.2355	13.7078	Test Set
rb_1627918	ATGCCTCATTGCTTACCCGGTTTAAGGCGTCGTAAATGGAAGGTCATGTTGGCACGTATGTTGCCTGGCGGGACCGCACT	17.8124	15.6968	Test Set
rb_5539688	GGGGCGAAGCGCTCTTTGTCTTTTGCGTTTCAGGTTGGGGTGGGTATCTGCGGCCGAGAGGTTCAAAAGCTGGCTGAGGC	16.909	13.7878	Test Set
rb_6761821	GATCCTGGGTGGTGAGTTCCGACGATCCCGCACCGTTTCTCTCATGGGAAACTATTAGGCGGATAACACCCACTCACCAG	16.5267	14.1613	Test Set
rb_2076969	GCAGATTGGGAATGCGACCGCTGGCCGGGCGGAGTACTGCCGAGGGAAACGACCGCTGAGTACTAATACATGCGCGGCGA	16.7161	14.3999	Test Set
rb_2230526	ATGTTGTGATAATATATGAAGTCGGTTGGAATATAATTCCGGGAGGCGACCCGGAGCGGGGTCACAGGTCCCGGCCGTCA	16.4503	13.7958	Test Set
rb_1233063	CGGCGAGTTCGAATAGGGGAACTCGTATATAGCTATTTATTCTAGTTGCGATTAAGGTACGTCAATTATATGTAGTATGA	11.7283	11.7756	Test Set
rb_4390493	CCTTTTGCTCCGGGTAGCCACTACTGTAACTTTTGTTAAAGACAACCTGTGAGGGCGTTGTTTACGCGACATGTCGGCGA	17.9716	15.0108	Test Set
rb_6365347	CTTTCCCCTTAGGTCGCTGGGTGCCTATTGGGCCGGGGCACTGACAGGTGTTCACGGTGGGCTTAGGGTTGTGCGGAACT	14.5308	14.1992	Test Set
rb_6138770	GGAAGGACGCAGGTCGATGTTTGGGCGCGAAGGTCGGCATGCCCAGGCGAGTAAGCGGCCTTTTGCAGACGTGGCCTCGG	17.424	15.0993	Test Set
rb_4317361	GTCCTCTCTACTATCAGTCGAGGCCCTAGTGGCAAATCCCGCTTCGATGCGGCACGATGGAGAGATCGGCCATGGCGTTC	15.1224	13.1339	Test Set
rb_4343840	TATGTTGGCATCGTATTTCTAGGTGTAACCACGCGCCCTGCAAGGGGCACGCGAGCTCCGCTTTGAGATTAGGTGTTTCA	14.7468	13.2583	Test Set
rb_2492764	GCCTTCGTTTTTAGTGTTTATGTTACGGGCCGGTGTTCGGCGTAGGTAACGTGGCAGTGGGTTGTCGACAGAACTGGGCA	14.8355	13.4166	Test Set
rb_2424362	GTTTTTGCGGGGGTGAGGGTGCTGTGACACGGTGGGTGAGTCGTTGAAACGAGGAAGGTAGGCGGCACGCAGATTTGGCG	14.6757	14.0922	Test Set
rb_1654376	AGTAGAGTAAGTGGCAACGGAATCAGGGAGTGTTTGGGTGAGGGCGGGTCCGCTACGCGCAGTCGGAGCGGGGAGGAGGA	16.2534	14.4082	Test Set
rb_2389610	CGAGTACTGGCGCCTGTCCGCGAGCGGCCACTCCGTGGACTTTGGGACAGAGCTATGTGTCTGGTCGTGGATCTTAAACG	14.7036	13.0976	Test Set
rb_4953484	CATCCATAGTAGCCGAGAATTTAGGTTAGGGGTACACTTCCCTCAGACCGGCTCTTCGGGGAGCTGATTCCGACGTTGCG	14.6166	14.193	Test Set
rb_2376366	GGTCTGTTGGCGTAATCCAAGAATGGGTCTGCCCCAAACCCGCTCCGGGTTGCATCGCGCCTGCTGGTCTACGTCCCTCC	16.1781	13.4771	Test Set
rb_4403382	CGAGATTGAGCGCGTGCACATACGTATGGAAAGGGTAAGTCTGTGCTGAGGTAGTTCGATGTTAGCTTCTCGCGAGCCGC	14.0538	11.8999	Test Set
rb_4699228	GGCACGGAAGTTGTTAAATTGTTACGCCTCAGGCGTTTCCCGTCGCTTTGCGGCAGACTGCGGGGTTGGTGAGCGTCGGG	16.372	15.0529	Test Set
rb_3976484	GACGGGTAATCTTGTGGGTAAAGAGATGTAATGTACCGCGGCGCGTGTTTATCCGGCGACAGATTTATACCAGGTTCTAA	16.2412	14.5241	Test Set
rb_3698784	GTGAAAGTTGGCGTGGGGGCGGTTTTGGTCCTAGTAGGTAGGTGCATTGAGATCACACTGTGGGCAGCACGATCCTGTTA	6.99885	4.23979	Test Set
rb_381604	ATGGATTATATGCGTAACCGTCGGAAGCGATCTTGATAGTCGGCCACACGATGACGTGGGGGGTGTGCTTGGGTCCGTGA	15.63	15.2672	Test Set
rb_1805602	AGTTTGGTGTGCGGTAAGGATGTTGGCAATGTGGAAAGCTCTTTCTTTGGGAAATGGTTGACAGCAGAGCCCTCTCCTTC	13.3495	10.6857	Test Set
rb_6213044	AGTGTCCGGTTCCGAGAAAGGCATACTGTGTCATGAGGCGAGTTTCATTGGCCCGCCCGTGCTTCGCCGCGCGTGTCGTT	17.1138	15.6904	Test Set
rb_6752406	GTAGTACGGTCGACATGGGGGCCGGTAAGGGGCCCGGTATTATGCCGGAGGATTGCGCGAGGAGAGGTACCAGCGCCCGC	15.1399	14.1939	Test Set
rb_5158031	GTGTAGGCTAGCGATAGCGGTTCTCTAGCTCGGAGTTGTTCACGAGGGCGGAGGTATAGTCCGTCGCTACAGGGAGTCGG	13.9429	13.8613	Test Set
rb_976975	TTCCCGGAGATTGGGGAGATCCTATGCCTCGAACAGGGTAATCAGCACTTGTCATAATGATAGCTGTCTTGGGCCGGTCA	15.0308	13.4382	Test Set
rb_264658	CGACGAAAATGATGTGTCGATATGACCATGGCGAAGTCCCGGACTCCCGGTGGGCGACGCGTGCCATGACTGGTGGTAGA	15.2984	14.4039	Test Set
rb_2882818	ACTCTGCGTGCGGCGAGTTCCGAGTTTTACGCACGTGTGAAGGGCAGGTTAAGCGTCTAGGCGTCTCACCGCCTCCCCTG	15.4193	13.665	Test Set
rb_251323	GATGGGCCTAAGTAATGTCAGAGGTGCCGTGCTGAATGATGTAATTCATTAGGTACTAAGGGTGACCTGCCAGGCGCTCG	16.4993	14.2572	Test Set
rb_6032011	TGGGGATTAAAGTAGACGAGTGGGTGTTGAATATAGGGCTGGCCGAGGCGGGCTTCGTGTACAGGTGGAATCCTCAGGCA	14.1381	12.0093	Test Set
rb_5675670	GGACCCGTGGCGGGTTTGGCTGCATTTTGAGAGTTACAAGGGTGGCCAGGCCGCTAAACTGGGTACGCGTGCCACGGTTG	15.4543	13.8662	Test Set
rb_4686914	ATCTGAGTTACGGCTCGTCCTCACCAGGCGGTTGGCGTTGGTAGTGCCTCTGGGGTTGGGCGAACGTTACCCGATGGGGG	15.8366	14.352	Test Set
rb_7488875	GATCTCGCCTACAGAACACGGTGGGTGCGGGACGGTGTCTAAACGTTTGCACTCTCGGGGCGATTCGGTGTCTCGTGACG	16.5055	15.2958	Test Set
rb_6143314	TCCCGGTCATAAGTGATTTCTGTACATGTTGACACGGGTATGATAGGGGGCGGCATTTTTTGTCTTCGTAACGGTAAGTG	13.4092	13.4648	Test Set
rb_3091696	TTTGGGATGCACGCGCTGCGGAAATTTTTAGTGGATCAAAATTAAGGCATATTGCCCCGAAGGAAGTGGTCCTACGAGTG	14.4657	12.7465	Test Set
rb_945262	TACTGGTGAGAAGATTGCGCGATTAAGCTGTTGCAATGCGCAGGGGGCTGACTTAGGGCAAGGCGGTGACCGGTGGTTCG	14.2622	13.443	Test Set
rb_935095	CGTGAAGGCTGGGTTTATTTGACAGTGAAACTTGGTCTGTCCCCTGTGCAGCGCGAGTGCACGGGACGTCAGCGCGGCGA	15.5407	12.9123	Test Set
rb_1348201	GGTGTAGGTTGTGACAACACGGCCCTACTTGAGTGTTCAAATTAACCCGCGTGGCTGGCGCCCGGGACCGGTGGTTGTTA	12.8458	12.9416	Test Set
rb_1533322	GCGTCGTTTTGGCATTGAGCCGTACGCTTTTGTTCGGCCGTTGGTCGGTGGGCTGCGCGAAGGAGTGTCGGACGCGTGCT	18.0842	16.4092	Test Set
rb_1913343	CTGACTAGCTAGGTCTGTAGGCCGCGCAAGTCTAAAACAGGAGACTTTTTTGCGAGCGGGTAAAATGGCGGGGGGGACGA	15.1157	14.6232	Test Set
rb_3294924	GGCGGGTGGCTTCGTAGGGTAGCAGCTAAGGTGTTTTTGCTCGGGGCGATTGGTCGTGAACTCTGGAAGACGTATCGGAA	16.1939	14.3652	Test Set
rb_2642987	GGCTCTGGTCGGCGGTCTGTGCTTCCCCTGCTTCAACTTGCGGGCGCGGGGATCGAGGCCGGGGACTCCACGAAACACGG	15.8561	15.3695	Test Set
rb_6126857	GAGCTTGTCCGTCAGGTTTCTGCACCGCGTCCCGACCTCTTCACAGCAAACAGCGGGTAGGTCGAGCATGATCCGTGGGA	16.2526	14.2366	Test Set
rb_5831193	GTAAACGGTGTAAGGGTTTGTTTTTTGTCAGGTACTTTTTTGTCTGCTTTATAGGCGTATAAAATGTGTTCTTTCCTCTT	16.1263	12.7777	Test Set
rb_3454307	GGCACCTCGGTGGGGTAATTGGGAGCCATTCTACATTTATCCGGGCTACTGAAATGGAGCGCGACCCTATGCTATCTGGT	14.5258	12.9814	Test Set
rb_5270574	GTAAACGTGTATCGTGACAAGCCGGCTCCATCCTCTGGTTCTCTGCGATCGAATATGGCCCGGGTGACCTACGAGGGGGG	17.3099	15.3737	Test Set
rb_2883536	GGTTTATACGCGCATGATGTTAGGGAGGGCCTTACCCGTGGATCCGTTGGGGCAGACGAGGGGGATCAAGCGAGCGAGTT	16.4118	15.995	Test Set
rb_5873495	GGAGCGGGTGTATCGATCCTCTAAACCCGGTTTTTCGTCCTTGTGCGGGTTCTTACTAGGCCACCAGTGGGGCCTCGGCG	16.7702	15.2065	Test Set
rb_5939148	GGAAGTCAATATCGGTCACTTCGACTAGCCGAGATGTACGTACAGCTTTGTTGAGACTGTGCATTTAAGGGGGCTAGTAG	12.8746	12.9962	Test Set
rb_1075745	CGAGAGAGAGTCTGTTGGAGGCCGACGGGATTCCGAGTTTTATCGCAGGCGTCCGATCATGTGGGCGCAGGGGGGTCCGA	15.8394	15.817	Test Set
rb_188813	TGTGTGTCACCGCCAACGATTCTTAGGTAATAAGCGTAGATATTTCCGTGACTGTAAGTTCTAACCCGCTGACAGACTGA	15.0579	12.201	Test Set
rb_4827587	GTCAGAGTAGCGCGGGCGCCCAGTGGCGGAGAGGGTCACGTTGCCACTGACGGACTGATTAACTCAGAGGGTTGCACTTG	16.2635	14.0931	Test Set
rb_2514871	GGCATTGCGCGTTTACGGGTGTCTAGGCTGGTTTGACACTCACCTGTTTCTTATCAGCAGGGGCTCTCAAGGCGCATGCG	15.4116	13.1931	Test Set
rb_1089286	ATAGTGCTCACGCGGCACAACTAAGGCACAGCGGTTTTGGCCGTATCACCGGTCCGAGTAGGACCGCCAAATAAGTGGGA	15.6605	13.8417	Test Set
rb_3957437	CGGGGGGACTAGCAATGCCGGGCGAGAGGCGGTTCAAGGCCGCGCTGATTAAGGTGGATTACTGGGTGGGCTACTGTCCG	16.2709	14.6682	Test Set
rb_535130	CAGTGGCTAGGTGCGTAAACTTCCATGGAGGCCCGACTGCGTTCTGTCTATGAGGCAGGGCCGGGAAAATGAGTTCGTGT	14.7874	12.7789	Test Set
rb_3750800	GGAGCGGCGATTCGTCCAAAATTTTCAGTGCCTAGGCATGAAACAGGGCCTTCTATTGACCAATGGGTTATCTTCTTGTG	14.5664	13.5313	Test Set
rb_3465572	CGGCTAGATTCCAGCGGACACTCCGGCGTGGTACTGTTTTCGCGGGTGTTGGTACTGCTGTAATTTTTCAGTTAGCAGGA	15.7106	13.4716	Test Set
rb_3734567	AATGGATAAGTTTGTTCTCGGGGTTGTCATTCCGAGCCAACGTATGCATGCGTGGGATTGGGTGGTGGGAGATGTCTCCG	15.2127	14.0027	Test Set
rb_5996134	ATGGCATAGGTGGCGATATTTCGTGTGGTGTTACATACATTAACGTCACTTACGTGAATGGGTGTGACTGTACCATTTTG	13.7445	12.033	Test Set
rb_1979753	GGTCAGTGGTCAGGGGTTTCGGTTATTTTTGGATTTCGCAGGGCGGGGGGCACACTGGGTTTAAGGTCGCTCTTGGAGCG	16.0631	15.1608	Test Set
rb_4499455	AGGGCCGGGCAAGGTCCGACCCCTGGCTCACAGGTAAGTAGGGTGCTTCGCCACGCACCTGCCAGTCTTAGGCGCGGGAA	14.5762	14.2497	Test Set
rb_7154067	TTTCGGACAAGTTGTCTAAGCTAGCGTGTAAATGTACAGATGTAGGGGCACGGGCTATGATCACTGGAGGGAGCCCCTTC	14.3903	13.9967	Test Set
rb_699004	GGCGCTAAATGAAAGTGTGAGGGCGAGATCGTTACTCAGCGATTGCTGCGTGGCGTCGGGTGTTGAATGCGACCCGGCCC	15.7813	14.2601	Test Set
rb_2095986	TAAGTCTACCATTTTGACAACTCTTTGTCCCGGACGAAGCGCGACGGTCTCACCTTTCGATCTACTCCCCCCTGGCATTC	14.6422	13.7204	Test Set
rb_3747694	TCTGTGTATGGCATAGATATGTGTCGCGAGCTGGTTTGTGTTGCGCCTGGGCAGACGTGCGAACCCGCATGGCGACTGGG	14.5492	13.71	Test Set
rb_4594806	GTTTGGGGTAGGGGTGGACAGCATTGATTCTGCCAGTTGACCGGGTAAGTATTCGCGCCGGCCCGGGCCGAAGTGCATTG	17.6012	16.2894	Test Set
rb_5588072	GAGGCTACCCGCGGCAAGGCTGGGAGTCAGTGTCTAAGATCTGCCGCGGGCTGTGGTAGCCACGCCACTGATGTGCGCTC	15.6199	13.7456	Test Set
rb_2175413	TATTAGACTTTTTGTCTTGGCCCCGCACATGGATGGTCCTATATTGGTTGGCGGGGGCACCGTAGTCCGCGTCGTCGGTG	14.3275	12.7788	Test Set
rb_1871369	TTTTCCGTTCGGCAATAATTTACTGCTTATATCCGGTTAGGTACTCTTTCCCAGTTCCCTCAGCACAAGAACCTACGTAG	13.8559	12.3644	Test Set
rb_4672408	CTAAGCTCGGCACTTTAGGGCTCCTCACTGTCACACCAGACCGTAACGATAGCGTGCAAGTGGGTACGGGCGTCGCGGTG	13.8803	12.0749	Test Set
rb_275565	TCTAGTAACCCGACTCGGCTTGCACGGGTTCGACGCTAAAATTTGTGTGTAGGTTTCGGGAGATATGTTAGGAGCTGTGC	16.2194	13.2524	Test Set
rb_2190239	GACGGGCCAGACTGGTCGTGGCGTATGACGGAAAGTAGGTCCGAGCCTTGAGCGTGCCGGGGTGGCGGCCCGGTGGTCGG	16.9411	15.1983	Test Set
rb_1671505	GTTAGCCGAACAGTCATCGTTCTCCAGAGGCGTCGCTAGGCACGGTTGGCCTACGGTGGCAAGTATTTGCGAGTCGTGGA	14.8953	13.2508	Test Set
rb_1186146	GGTTCCTTTCACGCGGCGCTCATCCAGTAGCTAATTGGGGCCCTACGAAGCGCCATCACGCGGGGCCCGTACCCGGTCCA	15.6334	14.2131	Test Set
rb_3844849	CGAGTGAGTTCGGCAAATAGTCCCTGCGACGAGAGGGGGTGTAGAGTGATGACCCTCGCGCGCGTCGTGGCAGTCTTTGG	15.9111	15.1775	Test Set
rb_2511884	GTGCGTGCTCTATCGGTGAAATGGGGTAGGGTCTCCTCCGCTGGGTCGGGGGTGAGAATGGTGCGCACGCGTGGAGCGTA	16.947	15.0319	Test Set
rb_3701389	TGTTCGTCCCTTGTTCATTAGTTTGGTATGTACAGGTGTAAAAGCTTGAGGATGATATAGTTGGTTACGACGTGTCACCC	15.6831	14.2096	Test Set
rb_3445847	GGATCGTCGGTTGGGGATTGGACCGGCAGGTATTTATTTCTTGGCTCCAGGATATGGCATATTTTTTTTCTGGTTAGCGT	13.7828	13.4572	Test Set
rb_2743561	TAGGCGCGAAAGCTTGTGATATAAGGGACGTCCGCTCTCCGTGAGTAGTGCACTGGGCCAAGGGCCCGGGGTGTGCTCCG	16.7417	14.819	Test Set
rb_6477877	ATCTGGTTTGGCATGCACTGAATGACGTCTGGGTGCCGCGTGCACTCTCGATTAAGCGTACGCGAATTGGTTGCAGCCCG	16.1347	13.6417	Test Set
rb_3084254	AATCCGGTAATTTGTTTTTGACTGGGGCGGTGCGTCGGGTAGTCGCAGGTCCTTCGTAGACGCGGGGTGGAGATGGATAG	15.5672	14.6667	Test Set
rb_6151386	TCGTCGGTAACGAAGTCGGGGACTGGACTGGGCCGCTAAGACGCTACCATGTTAGGGGCCGACTCCGTCCACTGGGCCCG	15.2476	14.3716	Test Set
rb_2566324	AGTATACCTATGACTGATTGTCGGCCACTGCCCTTCCCTCGCTGCGATGAGGGTCTGGGTGCTGTGAGTGCGGGCCGCCG	16.27	14.4225	Test Set
rb_5413640	CAACGCGATTTAATTCCCGTTTCTCTCTGGAGTCGATCGGCCGGTATGAGGTTATCGGTTGGCCGGTGAGACGTACGGGA	15.472	14.7352	Test Set
rb_3279981	TAATGTCTCCGGCTATGTCGACTCGGTCCCATTCGACCCGAGACAGGGGCTTGATCGTTTAGGGAAGTCGGGTGGGAACA	14.7445	14.6179	Test Set
rb_497650	TTCGCGCGTGCGTTGGCGTCTTTGGTACAAGTGGTCACTAGGGTCAGGACTGTGGAGTTCACGTGCGAGGCGGGGGGCGA	15.5166	12.6901	Test Set
rb_1821614	CAAAACTTCAAAGACATTTTATGCGGGGTAATCCCTGGTACCATGCTGATTAGCAGGCATTTATGAAACTTCGTATCGGT	14.6032	11.7183	Test Set
rb_1979905	GCCAGGATTCTCCGCCGAGTTGTAATGTACCCTTGTCCTTGTTTGTGGGCAACGACTTTAGCCGAGGAGGAGTCGCGAGG	14.6386	13.2868	Test Set
rb_1724967	TATTTCTAAACGTCGGACAGGGTGCGCGCCTTGTGGACGGGACAAAAAGCCACTAGAACACACTTTCAGTGTCTTTCAGT	15.7819	12.5915	Test Set
rb_3446717	GGCACTGTACAAGGGGGCACGCGCCAACGGGGGACTAGTTAAGCTTGGGTGACGCGGAAGGTGTAGTACGGGTGTTGGCG	16.1166	15.4818	Test Set
rb_740413	CTCGTTCACCAAATCCTTGAAGCGGTGCGTGATATTGGTCCCGCACGAACAGAAGACCTAACTGTTTCATGCATTCTCGA	13.8319	12.4084	Test Set
rb_6422479	CGCGGACGTTAGAGTACCGGGGTACGGCAGTAGGCGGAGACGGGCTACCACGGGCATGCGGAAAGTCCGCAGCATGAAGC	16.2179	15.3255	Test Set
rb_5885710	TGGTGCGTACCAAGCGGCGGTGTGTGTTATCCCACGGCGGCGTTGTGGTTAAAAGGTTAGGGGATGAGCACGCGTGAGGG	14.1996	14.2202	Test Set
rb_6054257	GCTGAACTAGTCTCGAATAGTTGGAAGCTTGCCTGATCCTCGAGGGTGGGCGGATCCCACAGGCGTGTCGCAGTAGTCCG	14.1136	13.0572	Test Set
rb_2259864	ATTAGGCGTCCGTGTCGGTAGGGGTATTTTGGGGAAGGGCGACGGTAGGTTGTCGGGCGGGCCCATTGGGGTTGTCGGAA	15.2509	14.8578	Test Set
rb_5977523	TTTACTTGTTACCGAAGGGTCGGAGAGGGGCAAGGTGTGTTAGGCTTGGTGTGGCACCCGGGCGGTCATGTCGTGCTAGA	14.7314	14.0862	Test Set
rb_4478776	CTGTAATACGAGGCATGGGCAGGTCCGGACTCCGCTGCGGCGGCCGAATAGGTGGGTTCGGGCAAACCTGTAGCGCTACA	16.5062	14.2393	Test Set
rb_5920080	TTTGGCCAAAGATAACAATCAGTTACCCTGCGGGAAGTACGCGAGTCACTTTTCTTCTACTAATCGGACCGAGGCGCTTA	17.5063	14.101	Test Set
rb_1613980	TCAGGCTTAGTGCATCCATTTCAAAAATTCGGCCATAGGAGCAGATTGCGATTCCTCGCTGTCACGCGCGTATCTGCCTG	15.1156	13.0248	Test Set
rb_2302104	GGCATCAGAAGATCAATCGCTCACCCTCTATCCAAGCAACGGGAAGAGTCGAGAAGTAGCGAGGGACGGCGAACGGTGCA	14.1788	13.4644	Test Set
rb_5462890	GCAGCGCAGGCGGGGTGAGTCGGGCAAGGATGGTGGTGGTGCCCACGGTGGGTGGTGACTCGAGCTTTTGCAGCTGATGG	15.3575	13.3556	Test Set
rb_6483689	TTAGAGAGGGTGTTGCGGGTTGATGGTTTGGCTGCCAGGTTTCGGGACGCCGCGGGTGCGCAAATTAAGGCCAAACGGGA	15.3709	13.313	Test Set
rb_6327642	GGCGCCGTGCTGCGACATAAGTTGACTCGCCCTTCCCGTGACCGGCACTCGGTACGGTCCCGATTGGGTGTGTGGCCAGT	17.4595	16.0656	Test Set
rb_7196699	TACTCTATCTGTGCGCTAAACGTAGGCGCCAAGGCGTGATCTATGCGTTCCGTCATTGACGATGTCTCGAGCCCAGAGTG	16.1496	14.3751	Test Set
rb_4225636	CGGGATTACGTAAGATGTCGGGAAAAGGTTACGCGGACAGCTCAATGAGAAAAGTGGGGTATTTACGGTGTGTCGGCGCA	14.1575	12.0617	Test Set
rb_4095429	GTATGTATTATGTCGCGTGTTTCCGTCGTCTCGGCTCCAGGTTTTAGGCGCCCGCCTATGGTGGCGGTCCACTTCATGAG	17.1455	14.9646	Test Set
rb_4062253	TTAGCGGACTGATTGGGCAGGCAGGGCGGTGAAAGTAGGTGAGCAGAGGGCCCGGTCGGGGGGCGAAGGGCGGCAGCAGT	13.836	13.549	Test Set
rb_1228306	GATTGGTGCGACGCGTCGTACGGAGAAAGCTGGTAGCATCGATTGGCCTGGCAGGTGGGTTCAGTGAGTGAAGATCGCGC	14.9699	11.4746	Test Set
rb_5855011	ATGGATGCATGTGGGTGAACGTCGCAAGGCTCCTGTCATCGTGGCGACGCGGGGCGCCGCTGTGAGCGGGATGGGCCATG	14.2965	12.5512	Test Set
rb_4492878	GAAAGGGAGGCCGTCGTATTGGGAGAAAGGGTATCTGGAAGGGGCTGGCGGCCGATCCGGTGCAGGGTTCCCCGGCGAGG	15.6687	14.0797	Test Set
rb_1338321	CCCCTACGCTTCATGATCAACAGGTGAGGAGGCGGTGCAAGGGTGGGTCCTGTACGGCCTGGGGAGGCCGAATTCCGTTA	15.3001	14.6375	Test Set
rb_3577212	CGCAGTTTTCGCGGCGAGATGTGTGCCCGGTGGGCGCCCTCCCGAGGCCCAGGTCCGTCCAAGTTTGTTAACGTTGGCGG	16.7362	15.7891	Test Set
rb_4065785	GTGAAGGGTCGCGCTGTGTGCCGCTTTGCTTCAGTTAACTAAAGCCTCTCTTACGTTCCGGTCTCGGACGTGGGAAGTGA	16.2428	14.0272	Test Set
rb_1131018	CATTCTGAGGGACTGGCTCTTTGGCGACTCGCAGAGCGCCTCCGGTGGGTGTAGTCCGGGCGGCCTCAACGGGTTTACGA	15.1682	13.5243	Test Set
rb_236318	TCAGGCCTGTTTATGTCTGTGTTGTGATCCGAACGGACTTTTTTCGCGAAGTACTAGGAGGTGGTCGTGTCTCGCGGCTA	14.8152	12.9658	Test Set
rb_439395	CCCCAGTCTTATCTGTAGTCCAATCCTGCCCACGCGGGTCAGGACGCATATCCTGCGCGGTGCCTCGGTGTCTGCCTGAG	15.0609	13.5718	Test Set
rb_3299675	GGGGGCATGCGGGTTATTTGTGAGTAGGGTGGCGCACAGTCCTACGGAAAGGCCTCAGAGCTCGCCTGTGCGAGGCGCGG	16.5742	14.209	Test Set
rb_4484133	TTGTTTCCTCGGGGTCGGTGATTGCATTGTGCGTACGATCTCTGCCGGTCGTAGTTGTTTTTCCGGGTCGATTTTGAGCG	15.9916	14.6614	Test Set
rb_433239	TGGCTGACTCCGCAGTCGGCAGGCTAGATTATTAGTAGGCACCGATGGACAGTTAGCAGCAGGTAATCTCACCCGGTCGC	14.8489	12.9214	Test Set
rb_572580	TCAAGTTTAACTCAGGCGGGCAATGTCCCCGCTATCTCGACGATTTTCCGTAATCTCCCTATTCATTAACGAACCGGCGA	14.6775	13.241	Test Set
rb_4114042	CAACTGTCAGTCGCCCTGCCTTTACCGCCCCAGGAAAGGCCGCTTTGTGCGACGCACGCTCATGGGGGCCGGATGGGAGA	15.8727	13.9854	Test Set
rb_5676536	AAGTGCTCGGCTAGGCTCTGATTAGGACGGGAATTCGGAGGCTTTTTTATTTTCTGTACACGTTTTTCTCTACGCGTACA	15.1639	13.3045	Test Set
rb_4454661	TTTCCAGCGATCACGCGCCGCGATGGGGGCCCATACAGCCTAGGAATAAGATGGAGACATGCTGTAGCATGGTTTCGGGG	13.747	12.8116	Test Set
rb_2379078	CTCTCGTTGAGTTTCGGCGGGCTTCGGGTATTCATCCGACCGCCATTGGCATAACTGGTGTAGAGAAACTGTGGGCCCTG	13.4908	12.259	Test Set
rb_6190472	TTAGTATTGGATAATTTTGTTGGAAGAGTTGAACGGCTTGAATGGCGGGTACACGCTCGGCGGCGTGCTTTTTAGGTGCG	14.6027	12.7558	Test Set
rb_3155856	TGATGAACAGTGAACGGGGACGCGCCGTGTATGATCCGCGGGATCGAAAGGTGTAGGTCGGCTGGGGCCTGGCTGTCGTA	16.4317	13.717	Test Set
rb_2781263	CCACGACTTTGCCGACGTCTGAGCTTAGGGGTCGCCGAGGCGGCCCCGCCCGCAGGGTTGAGACCGTGTAAGCACATGCA	14.4471	15.1559	Test Set
rb_1762128	CGTGCCGTTCTGTGGGTCCGCGAGCTACTTTAAGGCGCCTTAAAGTTCCGTATTCACCAACCAAAGTTTAGCCAAAAACA	13.7578	13.8826	Test Set
rb_2558114	AACAGCGGCTTATTCAGGCGGGTGGAATCTTAAAAAGTCAGTTCGGTCAGGGATATGACAATTGCTCGCGCAGACGGGAT	14.0011	13.4278	Test Set
rb_5856924	AGGGGGTCTGAGCGCAACAGCGTGCCCGTCCTTGGCCAAGAGGCCAGGGACGGTTTCGCGCAGGAGGCTATTGAAAGTGA	14.8789	13.9687	Test Set
rb_219434	GTCCTACTCGCCGGGGACTGCGACTAGTAGTCTGTCGGGGCCTACGTGTTAGGACCCAGGGTGTCTGGGGGGGCACCCGT	13.962	13.6913	Test Set
rb_1004618	CGGTTATCTCCGTAGAGGAACTGGACGGTCATGTTGCCGAGTCAAAGTTCCAGGGCGCCGGCGTTGGCAGCTCGGTTACG	15.936	15.1684	Test Set
rb_2415037	CGGCGCCGTGCAATCAGGTAAAGGGTGCGGTTGTTCCTGGCGAAGGGGGGGCTCGTTATCCAGGGATGGTGCAAACGCGA	15.7506	14.9249	Test Set
rb_731653	GTTAGTTTTGTCTTTTTTTTCTTTTATACGATGCTTACGCAGATCCGATGGGACTTTTTCTAATTTTCATTTGACCCGCA	14.7833	13.3516	Test Set
rb_765520	ACATGCGCGAGGGCGGAAACGTGGCCTTTCGCTGTGTTGTGTCCCAGGCGGGCTAAATGCCCCAAAAGGTTTCCCCCTGA	16.6993	15.5473	Test Set
rb_6353938	TGCGCCCCAGAGCTATTGCGGGGGAGAACGGCACCGTGGGGGTAACCGGTGACTGGAGTGGCTATAGGTAGGGTGTGACT	14.7302	13.3407	Test Set
rb_1282862	ATGGCCCCGTAACGAACTATAAGTATCTGCTCTGAGGGGGGCCTCTTCCCAGACGGGGTTACCCGAGCCTCGGCCATGAT	16.6718	14.425	Test Set
rb_607181	AAGAGTTCCTAACGAAAGTGCGGTGTCGCGTAATATTCGGGGGTGACTCGCTTTCGGTTCCGGCGGGGTGGCTTGCCCGT	15.5026	14.0697	Test Set
rb_4286819	TGCGAGGGTGCGCGAAAGGTGGAGGGCCGGACCTGAGGTGGCTGGCCTCCGGTTTGTATTGCTCCGGCGTCGAGAAGCAT	16.9933	15.2004	Test Set
rb_1189131	AAGAACCAGGTGCAGGCGTACATTGGGTCGGAGCTGAAGATGATTCCAGCGGGCAACGGGGAGGGCCGGGGCGGCGGCTT	14.2424	13.1576	Test Set
rb_424405	AGTTTGTATAACGTCTGACGCGAGGTTAACGAGGTCCATCTACCGGGGGGATATTGCGCGGTGAGGAATTCGGGAGTCGA	15.0304	14.0735	Test Set
rb_6959926	TAATTCGTATAGCAGTTTGTCAATAATGTCTAATCTCGGGTGGCTCTAGACCGGAACGACGCCGGGGCCATTGGCGTTCG	14.9912	13.652	Test Set
rb_5956497	GAGACTGCGGCATCGAGGCGGAGTGGAATGGTGCAAGCGTACGTTGATGGCGTGCTGTGACGGGCCCTGGGGTGCGACCG	16.1576	13.4997	Test Set
rb_6430677	GGGGGTGCCTCGATCTAGGGTGTGGGCGTTACATATCCGGAAGGCATCCGGGAGGTACGTGGTAGCAGGGACCCTCAGGA	13.8074	14.0097	Test Set
rb_4953304	GGCTCCGCTAGGATGCGCAAAGGCTAAGCTGTGGGCCGCGGAAGGAAGGCGCGGAGGGGGGCGTCGTCGGCGGATCGGTT	17.5222	15.697	Test Set
rb_5247291	TGACGCGCATCATCGTAATGCGGCCCGCCTGGTTGTTGTTGACAAGCTCTTACCAACTGCACGGGTGAAGGGAGCCAGGA	14.3964	14.2193	Test Set
rb_4397178	GGCATGCCATTGTGGTACTTGTGTCATATGCACGCAGAGTACGTGTCGGGGTGTCGGGCGGTCTCGGTCGATTTGGTGCT	14.4438	13.4009	Test Set
rb_227224	CATTCAAGTGATTGTCGGCGCGGCCACTGAGTCGTGTGCAGCATTCCTCGTGGAGACTATCGTGTGTAGCCCATCATGGG	13.5518	12.5148	Test Set
rb_4226339	TTTCCGGCGTGATCCAGCGCCTAAGCAGGGACAAACGGTAAGCCCGTTCGGTGCAACGATGGACTCGCGGACGGTGTTGG	15.7058	14.9816	Test Set
rb_6809576	CGTGCGGCCGCGTCTCAGCCTGGTAATAGTCGAGGCTGGGGCTTCAACTATCGTGACTTGGTACCGTGCGTCGTCGAACC	15.2386	12.5347	Test Set
rb_5230692	AACCGGACAGAATCTTTGTAAATGCCCGTGCTGAGGGCAAAGCAATACATCTGTGGGAGCGCGATTCAGTCGGCGAACGC	14.3227	12.3903	Test Set
rb_287615	CACTTAGTCGCGCGAGCTGCAGCAGCGCTGATATACTCGTGATGTGAATTTGACCAGTAGGTCACGAAACCCAGCCCCGA	15.0645	12.8495	Test Set
rb_137678	CGATCGCGTAGACGCGTTTCCGAAGGGATTCTTATGTGCGACAAGGTCGAAAACCGGAAGTTCGCGAAACGTGCCTTGCC	15.9596	15.3741	Test Set
rb_6735517	TTCGCAGATATAAAGAGCGCGGGGGTCCGCGGGCAGGAAAATGCAGTATTCGGGGCAGAGGGTTGCAGAGCTGTCTCATT	14.5272	13.5387	Test Set
rb_5767750	TCGCGCCGTAGGACGATACTGCGGACTTGGCCCACAGAAATCGATTTCTTGCATAGTAGCTATCGATATGTAGAGAGTTT	14.4367	13.0879	Test Set
rb_4722386	AATGAAAGGTGTTCTGGGCTTTGTGGTCTTTTGCAACGGGCGGCCGAGGTCCTGGTGTCCAGATGGTCGGACTCGGGGCG	16.9362	13.9861	Test Set
rb_4547126	GCGGGATGTTTGATATGCGCGGGCGGGACCCTGGCGAGTGAGGGGGTCGGTTGTTGCGTTCATTGGACGAAGGTTGTGGA	16.9231	15.2267	Test Set
rb_2356658	CCTCCTGTCTGTTCGTAAGCCAATCCTGTTATAGAAGATTTTTTTTTTCGTTATTTGGCATTTATGACGGAAAGGCGCAG	15.2929	13.2161	Test Set
rb_7091234	TTTTGTAGCGTTATTTTTAGTTTTTTTCAACTTTCTAGAAGTCGAGTCCGATCGAGGCCTTCCGAAACGGGGGTTTTCTT	16.4276	14.3546	Test Set
rb_4279663	CTTAGTAGGAGGTGCCACCAATCGCCGAAGACACTAGCATTCCCGCGTTGTTGGAGGCTCGGACCGAGGGTTGGGGGGGC	14.2165	13.329	Test Set
rb_1772074	GGGTTCGTATAGATGCATAGGTGCTCTACGCCCACTGAGACGGCCACTCGGGGCGCCGCGCGGGCCAGTAGCTTACCGGA	16.5812	14.114	Test Set
rb_7276644	TTAGGCTAGCGTGTCGCGTCCGGGGGCGGAGCTGGCCAGCCGGGCCTTCGAAGGAGCAGGTGCGTGGTGCAGTAGGCTGC	14.6169	14.5232	Test Set
rb_5134997	GAATCTCACCCCACCCTTACTTAGAACATTTTATTCGCTACGGTTCGTTCGCGCACTTAATACCGACTCGCGGGCTTCGA	14.1038	12.5344	Test Set
rb_3153194	GTATTGGGTGACGGAACTTCGCGCTCCCAAGTGCTCGTTTGTGGTACCGGTCCGTCGTAGGGAGGGGCGCGTACGTGCAG	18.0232	16.5377	Test Set
rb_3705838	CTGATTGCGTGGTGTTATTCCCGGCGCGGGTCTCGGCCACTAATGCACGTCGAACACACTCTACATGCGACTGAGAATCT	14.692	12.3554	Test Set
rb_2172954	GCCTGTTACAAGCGGTGGCCAGAGCGCGAGGTTGTTAGCGGCCGGGGGTCAAGCCACAGCTGGATGGTAGAAGGGTGCTG	14.6876	12.9826	Test Set
rb_1892421	GGTTCGCGTCAGCGTGCAAAATTGTGAGATATTTTCCCTATTAAATTCATAGCGCGTTTGTGCGCGGACAAGATCACTGC	15.4825	13.9128	Test Set
rb_4762347	GCTTCACGTGGGCCTGGCAGTAGCGAGCATATGACTAGGTTCTGTGTGAAATCGAGCCGCACCTTTCGGATTACCGGTGG	13.7367	13.3462	Test Set
rb_1778709	GTTGAGCGCCCCAGCGTGAGAGATGCGCGCAGCTGCTCACCCGGGGGATGTTGGGTCGGCTCACGCTCCGGGGGAATCGA	18.2267	16.04	Test Set
rb_900964	TTACATTTCCGGCTTCGGGCTATGGGGTCGCGTGTGGTGCGCGGTCGATACCAACGTGCTAACAGTGAGACAGTGGAGGG	15.3317	12.9577	Test Set
rb_5890797	AAAGGGTACGAAGTCTGGTTATAACCGAGTGTTTCGGGAGTGGGTCAGGGTAGGAAGGGTTACAAGGTGGCTCGCGTGAG	13.8449	13.6034	Test Set
rb_4032036	GTGGTTGTGTACTTATTTCTGCATTCATGATTCTTGTTGCATTGTTACCCGGAAGTGGTTCACCCGTGAGCGAGAGTTCA	17.0952	15.5591	Test Set
rb_7063828	CGGATATTAGTGTTATATGTCCCCCCTTGGAGTAACTAAATACGCGGAATTTAGTCCTGTTCCACGGTAAGGCGTGTCCC	14.5931	13.8548	Test Set
rb_3237076	TACAACTTTAGGTCGCGCGGTTGTTAGTAATCTCGTAGTCTTCAGCGCTGTTCACGGCGTCCTCGCTTCCACCGACTTGT	15.0456	13.044	Test Set
rb_2069269	AAACAAGGTGTGCGTAATGCCGCGTCAGGTGCCCTTTATGTCTAAGGTGGTGACAGTTCAGCTTTACCCGTCTCAAGCAG	15.0548	12.7204	Test Set
rb_2044706	GCGGAGCCTACCTCTCCTAGAGAGCGGAGCCAGAGTCGCCTAGGGGATGCCGCGCGATTTAGGTAAGAGCAACGCGTACA	15.972	14.0835	Test Set
rb_3854628	GGTTGCGCGACGTCCCATGCCGGCTGGGGTAGTCGCAAGAACCAAATGTTGCATACGGACGTCGGTCAGCTAGCAAGCAT	14.5238	13.126	Test Set
rb_1821819	GCGTGGGTGGGGTACTCTCTTAGTGAAACGGCGACTCTCACCTAATGACTCCAAGCTGGAAAGGGTAACTGACTCAGTTC	15.7383	14.7909	Test Set
rb_3399098	AGATGCAAAGATGAGACGATTTTAGCGAGTTAGGCGGGTAATCTACGTTGGCTAGCTAAAAGTCAAACTCTGGTTCTACA	15.1775	12.1434	Test Set
rb_6999914	GGTGGGTATCTCGGTGATAAGACTTGTGGCCCCATGAGTTGCGCACCTAGCCGATTTGTCGACCAACCCCCTTAAGCACG	13.9635	13.9058	Test Set
rb_4447186	CGGTCTGTGGGGTTTGCGGGCATTCGGGATCATAACCGACCTCAAAGCGTGAGCGGCGGTATGAAACGCGTGATACGCCA	14.7016	13.2006	Test Set
rb_1787833	GCGCGAGCTAGAAGCGTAATTTCAAGGGTGTAGGTGGAACGGCGCATCGGAGAGTCAAGTTGCTCGCCGGCTTCATCTGT	16.545	14.5263	Test Set
rb_6281257	TTTGGCCGTAGGGTTATTTTGGAAGGGTAGCACCAGGGGTTCTGCCCGGCCCCACCGTGGCTTGCACGTAGTTTCAAGTA	14.6182	12.9855	Test Set
rb_4562105	AAATTAGGATATGACGCAATTTCGATCGGGGTAATGTATAATATTTTGCGTTGACTTCGCGGGTGTAGGGTACCCATTAA	13.7791	12.4114	Test Set
rb_4757648	GTGACGGCACTAGCGGTAGCTACCGCGTCGTGTTTCGGATAAGATAAAGGAAGTAGTCGTCTGCTTTTGTGGGCGGACGG	14.8491	12.9415	Test Set
rb_3729499	GCTACAACATTTTTTTTCTTGACTAAGTCAACGTGGCATTCCTGAGATCCGTCGGACCCAACATGTGTAGTTCGGCGTTA	14.837	12.3815	Test Set
rb_3429077	TCGTTAGAAACGCGACCGCATGGCTATAAAACGCGTGGGAAGTTGCGCGGATTTATCCTCAATAGGTATGGTCATCTGGA	14.8491	14.1768	Test Set
rb_4025460	GCCGTGCGCACGGGTTTTAGAGTGAGTCTCTAAGGACGATCATATCTACAACAATTTGTAAAGTTAGTTGGGGGTAGTGG	13.9826	12.4729	Test Set
rb_1549333	GTATGGGACCCAATCCGGGTTGTGCGGGAGCACGTGTTCATGTATGCTATTCTGCGGTACTTGGGGGCGAAGCTCTATGT	14.5715	12.7365	Test Set
rb_6119983	GTTTTCGGACGGCTTGTAGGTTCGGCGGAGTACGGTGGCTCTGCGGGACCTCGCCGGGTACGCCGACGGTCCACCGCTTG	18.4158	16.4985	Test Set
rb_2512268	AAACCTAGCCACTTGAATCTTCATTTACCTTTACCCGTGCGAAGCCCCCGGAGGGAGAGCCGGCTAGGCCACTGCCCCCG	15.3801	12.9242	Test Set
rb_1084875	ACTACGACTGAAAATCGCGCGAAAAAACCGAGCTGTGCGTTATTGCCCGACTGCATTTCTCCGGCCGCGACTTTTCCACA	17.8453	16.0723	Test Set
rb_810715	TGACTTCACATAACGGGCAGGGCTGGGGGGGCGATCCGGTAAGGAGGCCGGAGGTAATGCGAGTGGCGGGTCACGGACAG	15.2773	14.3001	Test Set
rb_1977318	TAAGTTTGAAGGGATGCTCAAGTTCCGCTGGACGGGTGTAGTGTGCGGTGTTAGGGCGTGATATTTGAGATAGGGACGTC	15.5463	14.1389	Test Set
rb_1308752	ATTGATAAGGGATTGGGCAGTGACCCGCAGCGGCCCTTGGATCACGCATATTGTACGACCTGCGCCAGGGGCCCATGTGA	15.5845	14.373	Test Set
rb_5486189	ATGCCCGACGTCGATAACGTTACCCCGTAATGCGACGGGAAACACTTGAGAACAGAAATGGGAGGCACCGTATTACCTAT	14.9625	14.4702	Test Set
rb_2811066	CGTATTAAATGACTGAATATCTTCGTCCTGACACGTGGTGCCGTCGGCGGTGGCCTTTCGGGGAAAGATTCAGCGGGGAA	18.9897	17.3607	Test Set
rb_2811564	CGTGTGGTTGATTACTAAACTGTAAGGTGTGTGCCCACACTTACCCAGCATTCTGCTCCTGGAGGCGAGCGCTCACCGCG	14.3777	12.6336	Test Set
rb_1180433	TAAGCAACACCTAACCCGCCTGGTCTGCGGCGAAAGCACGTGTCGACGCTGGGTCTACTTTACCTTGGAGCGAGCTTCAC	16.651	14.568	Test Set
rb_3925329	CTGAGCGGTAAGGCCGAAAGCAGAACGCCCGTGCCCGCCTTCAGCGCGGGTTCCGAGTGGGCTAGTCGATCTGGCCGGGA	17.365	16.853	Test Set
rb_2933249	CGTCTGTAAGCAGCGACGGGCGTCTCCACCGGGTGGGCGAGTTAGGCGGATCGTTATGGTCGCCGGTACGGGGGCCCGCG	16.7503	14.8848	Test Set
rb_6559724	ACATTGAGGGGTTGGGGAAGTTTAGCGGGCACCAGAAACGGGGTACCGGACCACCGGCGGGAGAGATGCTGGTAGTCGAG	14.2694	14.3843	Test Set
rb_6889550	CCTGAGCGCTATTTTCCAGTCGATTTCAGGCGGGGCTATAATCACGCTGTTTGATCCTGGAGTTAGAAGCTACGCGGTGT	14.2298	13.3468	Test Set
rb_2077906	GGTACCTGGTGACAGACCGGCCCTAGGGCTACCCTTCAGGCTAACGTCATTAGAGACGGGTCAAGTATGGTGGGATGGCA	15.7482	14.5614	Test Set
rb_1174343	AAGGCGTGTCTCGTCATATATGATGCATCGTTGTTTTTCTCTTTTTCATACTTTCCATTGCCGAATGCTGCATCGGACGT	16.4189	14.3858	Test Set
rb_2277131	TTGGGGGCAACAGCAGCGGAACGAGGGGGTGGGGAAGGTCCGGTTTTCAAATGGCGGGGAGTGTCAACATGGCGGGCTGT	14.9257	14.1957	Test Set
rb_584003	AATCTTTCGTGTGCATTCGGCGTTTTTGTGCTCTTTCCATCCGGCCGGATGCGCGGGAACGACGGCACATACTAAGTCTG	16.6723	14.2809	Test Set
rb_7203534	CACTCAGGACCGTAAGCGAAGCCGCCGGTTGGACCCGATATGTAGTGAGTTGTAGCTTCGCGGCAGCGCAGCCGGAGGTT	14.0388	13.0141	Test Set
rb_793606	TTTGGTTGGGTCATTAGATTCCATATGTTATGAGCGCCGCGTACCGGCCTCAATTGAGGCTGGACGTTGGTACGGATTGG	13.9008	13.1176	Test Set
rb_3470049	AATAAGACGGACTTCAAGTGTACCCGGCCTTACTCGGGTCGAGGGCCGGCCACGGGTTCTTTCTCCAGCTTTCTCGCAGT	15.9296	14.4979	Test Set
rb_7147418	TGACAACGATGTAGTTCCAGAAGCTGGCCTGATGCCGTCGCGTGATATGGAGGCCGTGTACAACATGTGGACTCGTTGCG	14.51	13.1697	Test Set
rb_433991	AGGTGGATGAAAACTCGCCCTGTTGAAAGTCGTAGATTTGTCCAGCCCCTAATGTACGGGTGGTACCTCGTCCAGACTTA	16.7118	14.9667	Test Set
rb_6913581	ATCAGGTTCAGACCAGAATAGGCATTTGTACGATGGGATTTGTTTTAGGTGGGGGATGGGTTTGGAAATGTGTGCGCGTC	13.5532	13.0353	Test Set
rb_3642620	GCATTGAAGGCACAATTTCGATCGAGGTCGCTTAGCTATCGGGTCCGCGTGTTTTGGAGTCGTAATGTCGGGGGCTGGGA	14.663	13.8295	Test Set
rb_4865972	GTCGTCGGGGTAATCATAGGGTTCTACGAATTTCCAGTGATTTCGTTGCGAATATATTCTCAAGTTATGCATGTCTCGGA	14.8037	11.6154	Test Set
rb_7388302	GTTGTGTACGGGTCGTGCGTAGACTGTCGGAACTGATTTTCTATCAACCTCTTCCCAAGTGGAGGTGAGGGTAACGAGCG	18.3607	16.8768	Test Set
rb_4742523	CGGGCACCGCAGTGCATGCATGATTTTCGCTGGGGGCGCTGTTGTAGCGTCCTACGCTTCCGAGGTCTGGCAATTTAACA	15.172	15.0794	Test Set
rb_6584736	TCCTCTTTAGCGCTCCCTGGTTAACGGCGGGGGTACTTTGCGAGTGTAGGCCGGGCCATGGGTAGTCGCGCGCGCGGCAG	16.7936	14.856	Test Set
rb_2495596	TCCGTGCCGACGCAGAAGCATATCCTGTGGCAGATAAAATTGGCGTATCAGTTGCACCCCGCCAATGGCTCGGGGGCGTA	14.7982	13.7136	Test Set
rb_3382458	TCTTTAGCGGAACTCTCCGGACTGTGCTTCGGTGGCCTACTCTGCACAAGGCCAGTGTAGCCCCGAGTGTAGAGCGGGGA	14.815	13.9799	Test Set
rb_6010145	ATGTTACGATCGGGGATCCCTGCCGTGCCGCTTCGGGCCATCAATGGTGACAGAGGTTTTTTTTCAGGCATGTCCTCTTT	16.4818	15.2888	Test Set
rb_4433844	GGATAGCGCGTGTCCGATTGCTTCGGAGGTTGCTGTGAAGTATGTGGTGCCGGTACGTGTTAATGTGCCGCGCTCCCGTC	15.5351	13.6153	Test Set
rb_5395674	GAATGTTATTGTATTCATCACTATGTACGCTCTATGGCAATTCGATCTGTTGATTGCGAGTGCATCGCCATTTGGGCAAC	14.0051	12.0825	Test Set
rb_3331701	TCGGTCTAGACACGGAGTAGATCAGAGAAGTTCGTTCAGCGCAGTGGTGTGAGAGCGGGGTGAGGAGGTCCGGCGTCCGG	15.5672	14.4474	Test Set
rb_6772064	GTTCTAGTCTGCATGTTGCCGTACATGGCAGCGGGCGCATCGCCGTGTGGTCAAAGTGACGGATTTGGTCCCTGGCCCAG	15.3095	13.4406	Test Set
rb_391639	TCTATATGTGGCACTGCTTTTCGGCGCGCACATCCCAGGCCGGTGCCCATAAGTGGGAGCCGGGGTTTATGGCCGCCCGC	15.8741	13.9917	Test Set
rb_4259934	GCCGGATTGGTTTAGGCGAGGACCAACTATGTAGGGCCGAACCGTGTTGGAGCGTGCTCTCGGGGTCGGGGGTTGCCCAG	15.4721	14.011	Test Set
rb_497852	GCTTAAATGTGCCTCGACGGGGGTGAGGGGACACGGGGGCGGACATTTTTCCAACGGTCTGCCGTGAATAGCACGATAAT	15.9371	14.9174	Test Set
rb_3673368	CTGCGGTTGGTACGGAATTGTAAGACCTTCTTTGGCGGGGCTCGGAGTTGCCCGGGTGCGGTTATGCGCATCGACGACCC	16.3057	14.5587	Test Set
rb_1862622	AGTTTCACAGAGATAGAGTCGGTGTGCGGGAGTCCCGCGCGACCCTTGTCTAAAAGATGTAGGGTCAGCACGGTAATCCA	13.5803	11.8279	Test Set
rb_6326250	TCGTCGAGGCGGTAACAGTTATTCACTGTGCTGGATTCCGAGGTGCACGTGGCGGTGGGTACGGAGTAAGTGCGGCCGGT	15.1974	12.9125	Test Set
rb_4372011	TACCCGCAATTCTGGTTATGGGTTGAGAGCCGCGGCTGGGGGTTGTCGTACGTGCCCGGCTTGACGTTGGTCCGGGTAGC	16.9673	14.8842	Test Set
rb_968927	CAGTTATCTTCCGGCAAGTGCGAGGAGATAAAACCACTGTACGACAAGGGAAAGGCTCGCAGGCCATCTTGCCGCATGCG	14.3716	12.1717	Test Set
rb_1949186	TCATGGTACCCGGAGGGGAGCCTGGTGCTGGGCCTAGGCGTGGCGTAGTCCTAGGTGAGAACTGTAGAGTAGAGGACAGA	15.2176	12.6416	Test Set
rb_4396935	GTTCTACCGTCTAGCTTGGTTGTCTTTAAAGACGAAGCTCCTCGAGAGGGGCGCCCGGCCGTCAATAGCTGGTCCCTAGA	15.0058	13.4697	Test Set
rb_7058548	ATGAACTCCCATACTGAAAGATGCAGTAACCCTGCACTGACCGAGGGACGCCAAGTCGCTAATGTGTCCGCTCGCTGGCA	15.4673	13.0395	Test Set
rb_19654	ATGAATAAAGCGGTGAGATGGTGAGCGGGTTCCATGGTGGAGGCCGAAAAAGGCAGATTCGTCGGGGATCTGGCAGACGC	16.2264	14.0422	Test Set
rb_835458	TCAAAGGCGGTACCGGAATTGGCGTGAAGGGGAACGGTCGCGACGGGTTCTGGGGTGGCGTGACCACGCGGGGCAGAAGA	16.2527	15.3013	Test Set
rb_7406830	TGGCGCGTTTTGTCTTGTTAGCTGGGTAATTACCTTTTGAATTCGCGTCAGTTCCATATTATGTCCACCTGGATGGTAAG	15.1339	13.0833	Test Set
rb_1046658	TCCGCACCAGTGGGACTGCCGAGCCAGAGACTGCAACGGACCTGGCGTAACCATCCGCTAAGAGCGGGTAATTTTGAGAG	15.4702	14.4931	Test Set
rb_2404191	TTTTTTTCGGAAATGATGACGCTGTTGACCTATTTCTCGGGGTTATTGCACTGGGCGACCAGTTTGTCCGTTCTGGGGGA	15.6708	14.5998	Test Set
rb_5704805	ACTGAGTAAGCACAATAGCGAACAGGTCGGCGCCGGTGTCATGCGTTGATACGGGGGGCCGTGGCGGTCTGTGTTGCGTG	14.8125	13.3416	Test Set
rb_4257083	TTGCACGTCATTCCGCAGCTGGTGTATAGCACGATTCGCTAGGGGTTGTAGTTCGTGATGGTACCGTAGCCGGGTAGGTC	13.4935	12.9779	Test Set
rb_1898858	CTGGGCTCGAAGAATGGGGAGCGGGTTGACGGCTGGCGTGAGTGCCCATGGTCGCGCTTTTCTGTAGACATAGGCGGGAA	14.7774	12.9089	Test Set
rb_540888	GTGCTGGGATTCACCGGTCGCGGAGAAGTCAAAGCTGCCGGGTATTGTAGGGTTAAGTGGAAACATTGTTCTGGCGGCCT	15.4644	12.762	Test Set
rb_4203526	TCAGCTGTCGGTGGGTGTCGTGGTGGACGAGTGCTTGTGTATACGCACCCAACGGTCTGGCTCGAAGCCGGTGCCTCAGA	15.4578	14.1305	Test Set
rb_882951	TTAGTGTACGTAGGGGTTAAAATCCCTTTGTGGCGGGCAGTCGCACCGTCTATGTCGGTGTGGTGATGGCGCAGCACAGG	14.2176	13.3802	Test Set
rb_5152937	CAAGGCGCATTTAGGGAAACGTTCGAAATGAGAAGCGACGGCGCGCGCGCTCGGTTTGCCTGCCCTCGTCACATTGCTTA	16.8071	14.5215	Test Set
rb_2286062	TCTCCTATTAACGATCGAAAGGTAGCGATAGAGCGTAGCGGCAGCGCCGGGGGATGTGGTGGGTATGCGGGCGCGGAGGA	14.5779	13.0112	Test Set
rb_485839	CTAGTGACAGGGCGACCATGTCGTGGTTGCGAGGTGGTGCATGGATGTCGCAAATTGCACGACGTTAGTCCCGAGCATTG	16.5184	14.4339	Test Set
rb_4074878	ATTTTTATTCCGAGCGCACGACTGGTTCGTGTCTAATGTTTTTAGTGGCCACGAAGAGGCATATATAGGGCAACAGGGTA	14.6429	14.7698	Test Set
rb_4482909	CGTCAGGCACTTAGCCTCGGCACACAAAGCTGGTCACCGACGGGCCACCGCGGGGATATCCGTTGTCAGTGAGTATAAAG	16.063	15.4969	Test Set
rb_1980108	AATAGCTTATAAAATCGAGGAAATAAACCTTGAACCCTAGGAGGGAAAACGACTTGTTTGAAAATTACCCTGTGCGCACT	14.287	13.1115	Test Set
rb_1497198	GTAGGCTTTTGTGGGTGAGTCGGTATCGGCTGTCCGGCGTGGCGGTTTACTCCGCAGATTGGCCGGTTTCGTCATACGAG	14.6965	14.5969	Test Set
rb_6271317	TCACCGATGGTGGGCAACCCGACGGTAGTCGGCCTAACGGGAGTCATGCGCTGAGGTGTGGGCGTGGTATTATGGGTTGA	15.7127	15.2422	Test Set
rb_3818737	GTCTTCCGGGGTCGTGGCGGTCTGCGGGTACCTCGAATGTAGAGCTCACTTCGCGGGTAGCTTGGACGTCAGCCCGCGGT	15.9677	14.6479	Test Set
rb_264535	CGCCCAGGGTCCGTATATGGAATTTTGCGCGCAGGGCGGCAGGAAGTGGGTTGTTAAGTGGTGCTCGACGGGGTACTGGG	14.142	14.0319	Test Set
rb_5276804	TCGGTTGCTCAAATGGGTGTATGGACCAGGTTCCCATGCGCGTTGATCACTCGTGGGCAGCCAAGATGGAGGGTGCCGAG	13.5086	12.6403	Test Set
rb_5463122	GCCGTGCGAATATCCGTTGTTCCGGGCGTGCAGAGCGGACCTTCGCGGCCTACGCTAGAAGCGGGGTAAGCGTTGACCTC	17.7796	16.1557	Test Set
rb_4469252	GTAGGAGTGGTTTGGAAGGCCGCCGCTGTTCACGGCAGGGTGACCTCAGGGCCTTACTTGGTACGGGATATGGGAGGAGG	15.5935	14.3089	Test Set
rb_6428334	GTAGTTGCGGGTTACGTTCCATTGCTAGCTTTGAACCATAGCCGGTTTGTCGGCGTCCATGGGGGGGTCTGGCGGACCAG	15.3884	13.8065	Test Set
rb_3740974	TCTCAGCCATTCTCATGATGATTTTGATAAGCGACGGAATGCGCTACGTGGGCGTTTGGAGTTTCGGGCAATCGGACGCG	14.3328	12.6873	Test Set
rb_1023260	TTTCTCGGGGCGCATTGTCGAAATGGACGTTACTGGGCGGTGAGGGTCAGAGGCGCGCGGTGTCTCGAGTGCTTTGGGCT	18.0096	15.2843	Test Set
rb_5187093	TCTCCCCCTTTGTCGGAGGGCTGTGATGCAGGTTGGTGCCACACGACCTGGCTCCGTGGGCGTCGGGTCGGGGGCGTAGC	13.5618	14.1535	Test Set
rb_6245548	ACTAAATTCAAACGTCAAACTCAGATATCGTCTTGTACAATTTCTGTTCGTATTCTTGCCACGTGACCCCCCCGTTCACT	12.1663	12.1108	Test Set
rb_5112867	GCTCGAGACAGTTCAGCCCGTATTTCGGAAGGGGTGATTAAGAGAAGAAAAACGAACATTTTCCTCCCTTGAGTGATTGA	15.723	13.0218	Test Set
rb_1822702	TGGGGCTAAGGACGCACGGTTGGTCTCCTGGTAGAGTCCGTGATGGGTGAGCCTGGCCCCCGCGGGTTGTCCCCGGCCAC	15.413	14.3798	Test Set
rb_7387280	CCTGGCATTATGCAGGGACCGTCGCGATTTCCCCATTGGTTTGAATGCTTTTGATAGTGCGCCTGGCTTACCCGGGCTGA	16.2386	13.623	Test Set
rb_3907778	CGCGGTGTTTCCGCACAGGTGGCAACTCGTCTAACACCTTGCGGTCGCTACGCGCTTCGCCTTAAATAGCGCTGGCTCCC	15.9847	14.3897	Test Set
rb_3911680	AGATTGAGTTCCGTGACGCATGTAGCTGTCGGCCTCAGGATCAATATCCGGAACCTGGATGCGGATAGGGGCGCTGCGCA	13.3876	13.2227	Test Set
rb_6253469	CGCGCACCCATAAGTTTCTTCGATTCTAGGTCAGTGGAATTCGTTTTCCAAGTTTAGGTCATGACTCACGGTTATTTTTT	15.7288	14.6157	Test Set
rb_2856012	CGGATTCATGTCCGCCGGCGTCCGAACGACGGCGCGCCGGGGCGCGTTGGGCTAGGCGCCACGGGTCCGCGGTGTGTGTA	17.394	16.6607	Test Set
rb_2435100	AACGCGCGTAGGAGTCTGATTCGTGCGCAGGTATGAGTTGCTGAAGGAGTAGCGCTCGTGGATTCGAGGGGGTCCCGAGT	15.8872	15.4938	Test Set
rb_90335	AAATTGGGCGTCCGGAAGATCGGCCGGTAGGGGCATATGACGGAGTGGGGCGGCAGGGTTGGCTTCATTTAGGGTTGTCG	13.9533	14.8941	Test Set
rb_1543974	GCTGACCCTGTGCTAGATTCGTTACCCGTAGTGTTGAAAACCATTCTGGGTCTCATGATATATCGCGTGTGAGCTGATGT	16.881	13.2784	Test Set
rb_5448746	TACTCTCGCACTAGTTTTTTGGAAGACGGCGTTCATAGGCTAGAGCGCGCGGTCAACGCCCGAAGACTTTATAACCTTTT	16.4043	15.1342	Test Set
rb_4935788	TATGCAGGTGTTTAGGCTGTTCGGGGTCGGGCTGTTTAAGCGGTTGTGAGCTCTCGCTACGTCGCGGGTCGTTGGCTCTG	15.1378	13.7463	Test Set
rb_2139051	CATGGATGGATTCGCATACGCTGGAAAAAGCGTCACTCGGACGGTCGCACGGCTTTTCAAAATGGTACGTGCTGAGTTCG	16.123	14.6034	Test Set
rb_5876684	TAAGAACCCACAGGGGGGTGCCTATCTGTGGGGAGGTGCGGAAAAACGGACTGGAGGCTGACGTCGCAGGACGCCGAGCT	15.5092	14.5181	Test Set
rb_2197472	AGGATGGCTTGTGATGCAGTCGGGCGACGTTGGCTGCTGCGGCGGTTGGAGTTCAGGGTCATCGGCGGGGAGGAGGCGGA	14.8049	13.8702	Test Set
rb_1501166	ATGTACTCCGAGGCGGTGGAAATAGCCAAGCGCACACCGCCTGGAATATTGGCTTCTGGAAAATTAAGCAACCGAGGCAA	15.1838	13.1718	Test Set
rb_2906108	GTCCTTCGCACACGCGCTGCGATAGTTATCGTGTTAGGAGTCGGGGCGGTTAGTCACATGCTTCTGCGTTGGGTGTCTGA	14.0589	13.7057	Test Set
rb_3614370	GGTGAGAGGCTAAGGCTTTGTCGCGTCGAGTATAAGCGTCGGCTTAAATTCCAATTGGTGGTGCAGGGTTCGCGCGCGCA	16.3045	14.5659	Test Set
rb_6938103	TTTTATAGGTTTACGCGTTTTCTCTACGACAAATGGCTTTTTTTTTGTTGATGACTGAGGGCGCCACGGAGCGTGGTTGA	15.9813	14.0807	Test Set
rb_3310935	ATCCCCTTAGATCTATATGCCGCGCAGACCTTTAACCCATTACCCGCCAGAGTTAAGGTCCGCTTGGGAGGCCCGCTTCA	17.8945	16.8132	Test Set
rb_1239276	ACTCTTTACCCGGTCGACAATGGGTAGGGTACGCCCGCAGTCGCGACGGGGGTCACCGGTAGTCGGCCGGCACGCGCACG	18.0649	16.2534	Test Set
rb_4392918	AAAAGATTTGATGGCAGTACATCGCGGAGGAAGTGTAATAGTTGTGGTTACCCTCATAATGCCAGGGGTTCGGTTGATGA	15.683	12.7535	Test Set
rb_2200816	GAGTCTAGCACCTGTTAACAATGTAGGGGTCGGATGGTAAGATGGCGGGTAATTACGGGCGGACTGGCTCTATCTGCTTG	14.508	12.0867	Test Set
rb_2597879	CAGGTGCGAAGAAATCCAAGTTTACAGCGGGTCCACGTACTCCTGGGGCGTATATTAGACGGGAAAACCGGCCAGCGGGG	14.4186	13.7465	Test Set
rb_7000767	GGCGCTTGGCGCTGGCTGGCGAAGGTGTGGAACCCGCGTTAAACCGACGGTATTGTAGGTATCTGGAGATTGAGTTTTCG	14.6088	14.3607	Test Set
rb_5918121	TTGACACTACATAATACTAAATGCGGCATGGGTGGGCTTGGTCACTTGCTACGACGCGAGTTAACCATTGAGAATGGTCG	18.5715	16.6947	Test Set
rb_6092152	GTGTCAGGGGCGCGTGTTCGTGACTTGTAACGAAGCAGCGAGACGGCGCTCCACTCTAACGTCAGACGGGTTAGTCTAAA	16.0853	15.6806	Test Set
rb_2428130	CCGCTCCTCGAACGGCCCTTCTTCTTACCAATGGTTTTCACCCGCTCTGGGGACCTCGTCAACTCGACGGCAAAATAGTT	15.3547	14.2679	Test Set
rb_7164020	ACGTTTTGCGTGGTAAACGTGCTAAGTGCGGCAGGCTGCTAGGCGAGCGGGGACGTCGTGGATGAGCGGGAGCACAGGGA	15.5465	14.8621	Test Set
rb_288436	GTAGTACTCGGCGATGCGTTGCCTGTTGATGGTTAGCTATATTGCCGGGTTTTTTATATACTCGTTGCTTTGTCTCCTCG	13.9624	13.9099	Test Set
rb_2532893	TCATTGGGCCCATTTTTCACCAAAGGTTGCACGCGCGTCACGGTGGAAGGTCAGCGCGCATACAGTTCAAGGATAACGGA	15.4105	13.8814	Test Set
rb_3129187	TTGCCAACGCGGAATTACCAGCTCTTGCCACGTGGAGTCACTCTCTCGGAAAAGTTGTAGTTCCATCACTGGGTCGGCGG	15.961	14.2469	Test Set
rb_509202	ATCGAGCCGTCTCACGACAGCGAGTTGCACCGGAGGGCTGGGTGGGTGCTGTCTACGGGGTAAGTGATGGAGCAGGGTAA	15.9057	14.3797	Test Set
rb_2616655	GGCTGTCCCAAGTCTAGCGTTTTCCCGCGAGGAGACAAAGAGAGGTGGCCGTGATGGTTGCGTGACCAATCGCATGTCGA	15.6891	15.6437	Test Set
rb_1130991	GGTGTTCCACATTGGCATTCATTTTTTAATTAATATATATCCGTTCGCGGGTTTTACAATACGCTACGCTACTTAAGGAG	14.8045	14.1418	Test Set
rb_6939358	GTAGTTTCAAACGCGCTCATACCACTGATGGCCGGTGCCGCGCGAAAAATGAATTGAGTCCGTGAACGGGACTCCAGACT	17.7194	16.4804	Test Set
rb_57932	GCTGACCGCGGAAACATCATGTTGTGAGGGAGTGGGAGATCCTGATATCAATATAAAGTAGGTGAACCGTCAGATGTCTG	14.572	12.8056	Test Set
rb_2169898	GCAGTTGGTACCGCCCGGGCTAAAATCATGGTGCCAATTTGTTTATCCGGCGGGGCGGGCAGGACGGATTGTGCTCGCGA	17.9889	15.6791	Test Set
rb_2586961	ATGAGATTCCCCGACCGCAGGGTTGAGGAGAAGGTCACCGTAGAACGGATCGCTTCAGCGGGGGGTGCGACGGCTAGTCG	15.6324	14.5856	Test Set
rb_5712137	CCATGCGTTCGCGTAGGGCGGGAGTGGGGTGGCATTCAGACGGGGGAGTGTGAAGTGTGTATAGGCGGGACGGACACAAG	15.0105	14.1566	Test Set
rb_3606239	TGAAAGGTGGATCTAGTCTCAGGCGCGTCTAAATACGTCGCGTTCCGTCCCAGCCCACGATGCGCCGGGACGAAGAAGGC	14.6509	12.8006	Test Set
rb_2119849	AAATGCAATGTTATATATGATACACCTTATCGGAGTCGCATGCCGGGTAACGTCGGCAGTGTTGTGTCCAATATGTATTT	16.371	13.7666	Test Set
rb_2723513	ACCGGACTCGCCGTTCAACGGGGGGACATGGGCGCCGGGCATACACCCGGAAAGCGCGGACGGACGGGATAACGTGTTCA	18.3393	16.77	Test Set
rb_7366958	CGTTAGATTAGGGCTGTGCTGGCGCCGCCACTTCCCCTCAAAAGAAGCGAGCCTGCCCGCGGCCGGTGTCGTAGGCCAGA	16.0252	15.1386	Test Set
rb_6631264	CGATGGGTATAGGTTTCAGGGGTATTAAAGCGGCTCCGGGTGCCGTCGGGAGTGCCATATTAGGCAGCGATGAGTGTAGG	14.489	14.3277	Test Set
rb_1416545	GCGGAATCCGGTTGCATACCGGGCGTTGCTGACGCTTTACGCATTAGGGCGAGGCCTTGTCAAGTGCGCACCCGGCAGGT	16.2972	15.1532	Test Set
rb_784	GCTGTGAAGAGTATTCCGCAGTGGTGACTCGGCCAGGTACAACATGGCGCGGAGTGCAGGGAAGGGGGTTAGTACGGGGA	13.5962	14.9467	Test Set
rb_7509866	TGGCTTTCATGTTGGGCACGGCCGAGCCCGGGTCGGGTGAAAGTTCGAAGAGCTCTGTGGATTGGAGCCTTCGGGGTACT	15.1425	13.2134	Test Set
rb_1576431	TTTAACCACGGCCGCTCGGACTGTCCTTGGGCTGCCCGACCGCGGTCAAAGTGGTGCGCCGTTGACGGGATCGTCTCGGG	17.4761	15.9694	Test Set
rb_3986917	GGGAAGGGTGATAGTGAAATTTCGTACTTTGGCGCGGGGGTGTGTCCCACCGTCGGCGCAAAACTACGGGCGCGTTGCGT	16.2014	14.6531	Test Set
rb_1790624	CTGCGTGGGGGGTGGAGCGGACAAGTTATCGTTGAGCGCGAGGGGGCGACGTTAAGTAGAGCTGATCGAGACGAGGCTAA	14.9752	13.4856	Test Set
rb_2465944	GTAAACAGCTGCGCAGACTCGCGGGCGGGCTAGCTTGTGCCTCTAGAGGGATAGGACACGCCGGATGTCACCGCGAGAGT	16.1647	13.2871	Test Set
rb_2850924	CTTCGGCAGGTTTATCGTAAGCTGCCCGGAATTTCTACAGGAGAAATCTGCACGCTGGAGGTGGAAAGTGGTGTCGATTG	14.5608	12.8014	Test Set
rb_217266	AAGCTGTTCGACTGGGGGGCACCAGGCCGGCTCAGGTGTGCGGGCATGATTGGCCCGAGCGACCGGGAGAGTGGTTGGCG	16.44	14.5304	Test Set
rb_4527669	CCGCTTGGATGGGCTGCAGTTGGTCACTTGCGTTCTATGGGTGTAAAGGTCCGTGCCTCGCGCTTGGTGAGCTCTGTTGG	14.2239	13.2146	Test Set
rb_831955	GGTTGGGATCGCGATGGGGATGTGGTGTCTGGGGACCGAAAGTGTGACAATTGCATCTTCAGCGCGAGGTCCTACCCGGC	14.7686	12.525	Test Set
rb_3807432	AATCAATTGTACCCTCGGCAATCAGCGTAAGCGTCCCTATAATAATACGAACGGCGCGGTTTAGCTTGCGCGTGGAATCT	14.3604	12.1919	Test Set
rb_3580642	TATTTGTTGACTACCTCTTGCTCTAGGCGGTGGCGTAGTCACGTGAGTAATGACCTGACCTTGAGCCTCCGGGTACAGGG	14.944	14.5556	Test Set
rb_1726813	GGCTCGGCGTCGGCCTGTTAGCGTTTGGCGGGCGTGCATTTACTGTTAACACCACGCAGGGTAGGAGTACACCGTCGTGA	16.3317	13.0862	Test Set
rb_4821366	ATTACCTAGACGGCTGCCGTGCGCGGATTGCGTTGGTTTTCCACCAAGTGCACCCTGAGTTCATTGGTAAAAATTGTCTA	15.9056	13.3731	Test Set
rb_6632794	TGTATCCACCGATGGGCGCAAGGTATGTAGGCTTTTCGCGATAGGGTATGGAGGTCCGGCGGGTTACCCCGTGAAGTCGT	17.0777	14.6073	Test Set
rb_472031	TTTAGGTAGTTGTACCATGTTAGCCGGGCAGCGTGTCGGCGCATCGGTTTGTTTGGTTCTGCGTGGACCGGATCAAGGAG	15.5449	13.2133	Test Set
rb_6011908	GCTTTTTGTATAGGAGTGCGAAGCCTTAGCGGTGGGTGTTTGCGTAGTGTTTGTAAAAAGCCTCTCGGTCCGGACCACGA	16.1084	14.077	Test Set
rb_3809411	GTGCCCTGTTTGCCGCGTTCGGCGGTCCCAGGGGCACCTATCGGGAATCGACTGCCCGGCTAGTGTCGTGATCTGGCAGA	16.6073	15.5627	Test Set
rb_2743183	AGTGAAGAGTTGGGTCGTCTTAAACTTAGATGGTCTGCGAACGCTGTGCCGGCGGTCCGTCCCAGGCGATCGGGGTTCGG	14.68	13.1354	Test Set
rb_4421924	AAAAGTTAGGCTCTCCCTACGGTAACGAGGGCTGGACGCATGACACGCGTAGTCTAGTGGAGCCGCTCCCGCTCGCTTGT	15.2792	13.8143	Test Set
rb_5740312	GTGCGCGTTTAAGAGATGTCGGACTGAGTGCCCGTCAGGTAGAGTGAGTGCGTGCGTCGAGATTGTTGGGAGCCAATAGA	14.0647	13.5467	Test Set
rb_5194767	TGTGGTCGACGGCTAACGGGTGGCTACCAGTGGCGGAGTCGAGGCCGGGGAAAAACCGGCAGGGGAGCCAAAGCGGTCTA	16.0177	14.3573	Test Set
rb_4099854	TGTCCGTCATGCTTGGTTAGTAAGTTTTTCGAAAGAGTCTGCGCTGAGAAAGGCCGAGCTCACTGGCGGGCCAGCCTCTA	15.6668	14.151	Test Set
rb_2569047	ACGGTGCCACATAAATCGTCTATGATAGCGTGTAACTCTATTAGGCCTTGGTCACGGGCGGCGCGCAAGCCGATTTGGCG	13.6612	11.9752	Test Set
rb_6356718	GCTGTGGCGCGGGGATAGCGGGGGGTCGTGGTGTGGCGAGACCCGGTCCGCGATTTGGGCATTGGTGGAGTGACGTGTGT	16.0555	14.5371	Test Set
rb_1239827	GGAAAATCTCGTGGACGATTCGGTGCCTACGTATGGTGCCAGGAGTGTCGAAGAGGGCCGTTTTGTGGGCGCGTCCAACG	15.024	14.5056	Test Set
rb_6005440	GAGGAGGAAATTTGGCGTGTGCGAGCCGCTGGAAACGATGGGAGGCAGCGTAAGGTTGCGGGCGCGCAAATGTACGCTGA	15.6122	13.1043	Test Set
rb_6557915	TTTATGCGTGGTAGTGCTTAGAGTGGCATTTGCACGCCCTTCGGCGCGAAAAGGAGACAGGTATCTCGCGGTGTACGGTT	15.6996	14.3796	Test Set
rb_4071306	GGAAGCTTGTGTCACGCACGTGGTCCATAGCTTACGACGAGAGCCACTGCTCGCTGGTGACGGGCGGAGTATCGGCCACG	17.119	13.7805	Test Set
rb_7385957	TACTTGATACAAGCGATCATGAATCAAAGGTTCGCGCGTAGTCGCCAGTGAAGTCTTTGGAACGTCACGCACATATCACT	15.3201	13.2229	Test Set
rb_5297137	AGGCTTGCTCCCCGTAGCCCTTCTGGGGTCGTTTCACATATGTGTCCAGGTTCAGGGAGTTGGCGGGGCGCCCCCTGGCG	13.9382	13.1987	Test Set
rb_2003955	TGATAGGGCGCAAGTGGCTCCCGCGGACTGGTCTGAACTGGGAGGAGGAGGCGGGTCAATAGCTCGCTGGATAGGGGGAC	15.5095	15.7244	Test Set
rb_7019693	TTAGTCGGAGTAGTGGATGGAGCGGACGTGGGCGCGGGACGTACATAGTACAAGCTGTCGCGAGGTCAGGGGGGCCCGCT	15.6751	15.2016	Test Set
rb_962518	TTGCGCAGTGCTTTCGCTTGACATCGGAGTTATGGGGTCCCTCTTGTCCTGTTCCGGGTGAGGTATGTGTCGTTGGGCCA	15.7894	13.8237	Test Set
rb_3508923	TCGTCCTGTTGGGACGGGCAGAGTCTTGGAGACAACGACCCGAGTACGAGGCAGCGGAGCCGGCGGAAGGCGGGAAGCGA	17.1407	14.7393	Test Set
rb_3126737	GTCTGGATGGGGTGTACATGGCGTGCGGGGGCGCGGCCGAGATAGACGTATTCCGGCAGTGCGGCGCTGTATTTAGTTCA	15.0541	13.6441	Test Set
rb_4211221	AGCCTGCGGCGGTACGCCGGTTGTGTCGGGCGTAGTGATTGGATATTGCGTGTCGTTGCCGATGTCCCTTAGGCGGCGAG	14.4495	13.3942	Test Set
rb_297712	TCAGTTTCGGTCTCGGGGCGCTGGGGGTTATTTGCTCCCTTAATTTTGGACGTTCGGCAGACGGATACACCCTGGTGTCT	15.798	15.6608	Test Set
rb_3426462	GCTCTAATGCGGGCTATAGATGTCATGACCACCGGGGGGTGGCCTGCGGCAGGCTGGTAACGGGACCACTGCGCGCTTAC	15.1525	14.4177	Test Set
rb_3417706	TCGGAGTGTCGGTGCTACCGTCGGATACGGCCTTTATGGACTTAGTCACGTGGCGCGTGTCGCCTCTCTTAGGATGGATA	17.1239	14.7068	Test Set
rb_5531012	GCCTGATAGAACACGGCGACACGTGTTCGGGACACGCAGAAGTGTTGGGATCGGCCCGCGCTGTGGGTGTGCATGACAGA	17.276	15.5118	Test Set
rb_6477155	GCGCGGGGCATTATATGTGACGCGCGGAATCGCTATTGAGGCATTTAGCAAGTGATCCGTCGGAGGGAGGGTGGCGCGCT	18.1101	14.9589	Test Set
rb_1087512	TAAGGTGCGAGGTCACCGATCACGTTGCGCGATACCGGAAAATATTTTCGAGGCGCTATGATTTTCGATTAGGGTTCGGG	16.6055	14.3205	Test Set
rb_1951539	GGCGTCGGCACCTTCCTAGCCGTCCTCACCAAAACGCGACGGTAGCTTAGAGTACGTTCGACAGTCAGGAACGGTGGTCG	15.0229	13.1972	Test Set
rb_2946268	GGACGCATCAAATGTCTGCGGCATGGTCAGACTGAAAGGTATGTGTGGGTACTAGGTTACGGGTGGAGTGGCGGGGCAGA	14.3414	13.1802	Test Set
rb_5613830	TGCCCGCCCCGATGTGTGGTGTTTCAGCGTTTAGGTAAGGACAACTCTTTTCGCCACAAGGGTATGATCCGCGAGCCCGA	15.2693	14.1307	Test Set
rb_1115299	TGTGCGGCCTGGCGTGGGTTGTCTGTTATGCCCGTACGGTATCATGGCAGGTACGCGGTGGATAATCGTACCCTCGCGGG	14.654	14.6804	Test Set
rb_2825353	AAGTGAAAGCGTGAATGGGTCGCGACGGTTGCGCGCAGTCGGCAAGGTCGACAGGGTCATCTGTGGGTCCCGACCGAGAG	16.6358	14.4616	Test Set
rb_3738401	CAATTCAGGTACCCAGACCCTGTAGTACCGCAGGGCGTCCAGGTCTCGGGCGGGAGACCGCGCGAGTATGCCTTCCTAGG	14.2007	13.063	Test Set
rb_4971799	GACTAGTGGCCGGAGTCCTGCCTGCGCGATCGTTATTTACGTATGATAGAGGTATGCGTCCTAACCTAGCTTTTTTTTTG	15.0386	12.9596	Test Set
rb_1833082	GTATAAGATGAGGTTGTTGAGACCCATGCCTGTGCTTGTTGGTCGTAAAATGCCTACTCCACCGTAGCAGTCTCGGTATA	16.6762	14.3883	Test Set
rb_1208937	TTGCAGTCTGTTCGACAACATTCTCCTATGCAATTGGTCGTGGTACATGGGTTTGGGCCCGGACCCTCGACGCGTGCCAC	14.1226	12.5335	Test Set
rb_7336569	CGCATATACGGTCGCCAACATCTGTGGTATTGCCACGGTTTTCATATCTTCTGATTCTACACATGATAAAGGTAAAAATT	13.0916	12.0529	Test Set
rb_1799175	TCCATACGTTCCGTGAGGGAGGGTTAATTGCCACGGCGAGAGGGGTATCGCTGATGCAACCCTGGGAGCTTGTGGCCCGG	14.4792	14.5945	Test Set
rb_1287183	TTAGAGTAGGCGAGCGGAGGGAGGTGGGGAGAACTTATCCCGTGTGTGTCGACCCTTAGTCAGTTTCGGGGCGCTGTCCG	16.49	15.0767	Test Set
rb_5045254	CAAGGCGAGCACGACACCAAGATCTTAGCGGAGTTCCAGGGGTAGGCGCTCCTGTTGGGGAGGCGTGTGGGTGGCGAGTC	15.7747	15.6078	Test Set
rb_6076269	AGTGAATTTGAATACTCTACGGCGCGTGACGGCCTACCCTGCTGAAGCGTGGTCCCGTCGGGCCTTGCCTTAAGCTTTCT	15.8753	14.5356	Test Set
rb_54889	GGTAGCTCTAGGGGCCTCGTTCTCAGGTAAGGGGGGGTCTATTCGGGCAGAGGGTCGGACTATGGCGTGTTGTGGGACCG	14.7554	13.6796	Test Set
rb_1354089	TGTCTTCGCACTCGCTTTCTCTTGGTGAGGTTTTCGGTTTTGAAGTCTCGCACTATGCTTAAGGCCGTCAGGCGACGGCG	16.1572	14.408	Test Set
rb_3293263	TTGTCGGGAGATTGTTAGATGGTACACCAAGCTGGATGTCCGGGTTCTGAAAAAGGGGAGGAGGTTATAGCTTGCACAGA	14.1459	12.9486	Test Set
rb_305958	TCGCGGATGTAGGTCCGGGAGGGTACGAGCCTACGTGCAGCGCGCACAACACCGTTACTGTAGGTTGGCGGGTGGTGATC	14.91	14.3674	Test Set
rb_2837108	TACAGGCTCGTCAGGTTCTTCAACGGATTCCGGACTTTCCGACAGACTTTTTTTCCTTTTAGAGCTCGGTAAGACGGCGA	15.6269	13.8292	Test Set
rb_3666588	AGGCCGTTAGTTGACACAATAGGTGGGCGGGAGAATTGGTGGGGACTGGGTGCTCCGGCGGGTTATATTTAGGGCCGGCG	16.9237	14.1958	Test Set
rb_5177628	GTATTCAGTGAGGGGCGATCTATTTTGACTTTGTTTAGATGCTAGGGGATTGTGATGCCACGGGCGCAACTCGTGCGGGG	15.8304	13.8745	Test Set
rb_768663	TATAGACATTCCGGTGGTATCGGGTTACGGACCGTGGGTGTTCGGGCGGGTGAGGGGCGGTAGTTATCCGTAGAGTGGCG	17.778	15.7317	Test Set
rb_496022	TTAGGAGCTGTGACAATGGTCGTCTACCATGCGGGTAGCGGATTGGTTTTGGGCCGATATAGTCCCGGTGGCTGGAGTGG	16.2116	13.9451	Test Set
rb_5895201	GCTGAGATGGTGGATGTCGTTTACGTCGACAGGGTTGCGCCTATATCGGTAGCGGGCTAGTCATAGTTTACGGTGGGGCA	14.4025	13.3738	Test Set
rb_2701294	GTTGAGGAAAACTGTTACTCTGAGTAGCCCCCGGTGAGTGGGTTTTCGTGTTGAAGGACACATTAGGTCGACAGGGTGAT	15.4999	13.981	Test Set
rb_2017448	TCCATGGCTCGCGCTGATGTACGAATTTCGTTAACACTACTGTCTCACGCGTAAGCCGGCGCGCGGGTGCCATTAGGTGC	15.3322	13.3433	Test Set
rb_4391774	CCATTTTGGTGGGGTACGCAGGTCAATAGCGGTATGCCACCACCTAGACATTCTCGGACACGAACACTGGTTTCGCCTAG	15.8416	13.6951	Test Set
rb_548274	GGAAGGTGCGTTAACGTGTGGGAAGTGCAGTTTCAGCTAGGGGACCGTGGGCGATCTGTACAAATCCGAGGGAGCGCACC	14.0184	13.869	Test Set
rb_6907382	GGTTTCAAATGATTTATTCGGGTGGCTATCTGGCCGTTTAACGGTTGGATAAACATTAGCCTCCGGGTAAGGGGTGGTGA	16.1545	13.8526	Test Set
rb_243896	GAAATGATGAAAATAACCCACCCGCGCGTTGCGCTTGCCCACTATAATTCTCAGGGTCAGGGGCCATACGGGCCTGCGTA	13.9569	12.9805	Test Set
rb_2163613	AGGTCGGACGATCCCGCCGGGCTGCCGTTGCGAGAGGGACGATTGGGGGCGTTAGAACCGTGGCTGGGGTGACATCAGAT	15.1193	14.0045	Test Set
rb_2897783	GAGTGGCCCAACGGTGCAATCGCAGGGCACCCGGCTGACTGCCGCTAGGCGCATGGAATCACGCTACAAGTTTATGTCGA	15.0529	13.4284	Test Set
rb_4259544	ATATTTTGGTTTGTTATCGTAAGCAGCGCGTTTTTCTCGAGTTTGTTATGTCGTGTCCTATTTGACGGTGAGTGCGGTTT	13.9764	12.5071	Test Set
rb_3254713	TGAACGAGGCCGAGTCAAAGGGTTTCGGCAATGTTGGAGGTGAGAGGGTAAGCGAAGTGCGTCCGGCAGGTTTGTTGTGG	16.823	14.5805	Test Set
rb_343187	CCTTTGTGACGTGTCTGAACATCATATGCTGGGGACGGTTCCACGCGTGCGGATGTTTCGCTTGACCAGGGTGGGCGCGT	14.958	13.6084	Test Set
rb_57704	TCAAGCTATGGGTGAGGCCCGGCGCCCCATGGTTGTGTCCCCTCTGCCAACGAGCGTGCCAGAGGGGAAGTGGGGGGTTC	15.0806	14.2083	Test Set
rb_220071	TCGAGGCTGGCGACTGAGGACTGGAAAGGCCGGTCGCGTTATACGTGGGAATTCGAATCAGAGGCTGGGTGGGGGCTGGT	14.2873	12.8623	Test Set
rb_7524475	ACGTAACGAAGCGCCCATTTTGTGTGGCAAGTACAAACATGCGCGGTGACGGGCCTATGCAGTAGGTCTTCCGGCCGGTG	15.7027	13.5049	Test Set
rb_7430544	AGACATCGTTTCAGAGGGTCCTCCACATAAGTATCTCGTTGCCCGGAACCGTGTCACGGGCCCGGAGTGTATGCAAAGAG	15.2055	12.8237	Test Set
rb_6966731	TCGCTGTGTGGATTGTCGAGTTTGAGCTAACTTTCTACGGGGTGTAGTGTGTGGGTCACCCGGGATTAGGGAGGCAACCA	17.4739	15.8579	Test Set
rb_3290371	GGTTTCGCTCGCGGGGTGGTGCGGAGGGACATGGTGGGTTGGACCCGGAGGTGGTGCGAGCGTGCGCAACGCCGTATTAG	16.9892	15.0054	Test Set
rb_3459652	GCGACTACAAATGGGCAAAGCGCTATCGCAGTTTTATCATCGCGTAGGGGTCGGCGGAGTCAGGATGCTAGGGGCGTTAG	14.0879	12.5283	Test Set
rb_2658785	TCGCGGCAGGCGCTTTATAGAATGGCTTTTCTTTACTGGCTGTGCTGCCGACGGGCAACGCGCACGTCGTCACGTGCTGA	17.6388	15.01	Test Set
rb_1907287	TCATTAGAACGAGGATTAAAATTAGTTTAGCGAAGTATTGTCGCTTGGACGCAAACTGTACGCAAATGACACAGTTGCCG	13.7366	11.7908	Test Set
rb_2027988	AGCTTGTGTGCTCATAATTTGACGGGTGCACTTACCCGGATTTTCTTGCATCAGTGGTTATCGAATGATCGTATAGTTAC	15.7966	12.7682	Test Set
rb_1126384	GTATTGCTCAGCTAAGGTTCGGATGTACAACATCGGCATGTGGGTTGAGGCGTGGTGAAGGCGGTCCCGGCATGTCCGGA	15.1003	13.0934	Test Set
rb_4582287	GCTAAATGCAAGGAGCCTAAGTATCGCGTGCGTAAGCGGGACGCTCGCAAGTCGCGAGCCTCCAAGCTTGCAAGGAGAGG	14.8305	13.7435	Test Set
rb_5839920	TCCTTGGGGTGTTGTCATTTCCGCTCCTGTCGCGTCGGCCGATTGACTGAGTTGTTTCGGGCTTGGAGGGATCGACTGTC	16.4823	14.7077	Test Set
rb_2064467	CGTCAAGCCCTGAGCTGCGTACGCATTTTCGTGCGAGTACGAACAGGTTTCACGTGGGATATCACCGGTCCGGCGGTGGA	15.5263	13.6626	Test Set
rb_5023973	CGCCGGGTAGAGTACTCCCCGTTGGGGTATTTGTAACCCAGCCGGCTTCATCGGCCGTTTGGAGGGGAGACCGGCGCGTC	17.6768	15.7915	Test Set
rb_2919287	AACGGCTGGCGCCTGAAAACGTGACGGCACGCGCGCTCCCGAAAGTGTGAAGCGCACGTTAAGCGAGATTGTTAGGCGCG	17.1388	15.6056	Test Set
rb_207405	GCGGACAGATAGACCTGAGGAATGTGTTACGCCCGAGCGTTAATGTACGCGGCCGAATCATTGTGTGGATGTTCACGATA	14.8763	13.1877	Test Set
rb_3091378	GCTTTTGTCGTGATAGGTGAGCACAAAGTTAGGGTCACACTGTTATCTTAGTCACTCGCGCGCTCATGTTACCGACCCCG	15.8462	14.5113	Test Set
rb_3660430	GTGATTGACGGGCATCTGGCTTTCCAGGTTGCATAGCTTGTGTCTCAGTGGCATGGGGTGTGGAAACTCGGTGTCAGCAG	15.4357	12.5226	Test Set
rb_6832951	TTTAGGGAGAATGGTACGGAGCCCAGCGGTGGTAGGGCGCGAAGCGTGAGAACGTGCTAGGGAGGCAACACAGGCCGCCG	16.8835	15.0429	Test Set
rb_4967658	GGTTTTTGACTGCAGTTGAGTACCCCCATGCCCCTGGCCGACGGTGTAGTTGCGGCTTGCCCCTCACGTATCGCTCCAAT	14.0786	14.1895	Test Set
rb_1075308	CGGTGTATTTTCGCGAGTGCGGGTAGAAGCTGCCGGTGTAGACGGGTTCGTATGGGCTAACATTTTAAGATGGGGGCATG	16.2455	14.1879	Test Set
rb_5424952	TGATGTTGTGAATCTGTTATTTGAGGTATCTTGTTCTCGGGGCACTCCGGGTTTAAGCGTTTCCCTCTGGTTTCGCGCCG	16.1557	13.7647	Test Set
rb_320278	CGCGGCACGGATCGTATAGCATAGTCTCGGAGGGGCCCTGCTGGGCCACGAGACCTCGGCAGGGCGTGATCCTCGCTGTT	16.1403	14.8903	Test Set
rb_1794792	TGGCGTCGAAAGGGTCAGTCGGTTTCTGCCCCAACTAACGTAGTACCGCACGAGGGGAGGGGCAGAACGAGGGTGCACAG	14.2695	13.7293	Test Set
rb_3501621	GACCGATGCGGTTTCGAACCTACAGATTCAGGCTGACCCCATTAGGACCGTCATGTGAGACCAGGACCATTGACCCACCG	13.4304	13.3808	Test Set
rb_7469607	CTCCGTTGCTGTGCGCATTAAGAAAGGCGCTTACATCCAGGTGTTCAGAATTTTTTCTCCCGGAGCAAGACTTTGTCAGG	16.1574	15.0421	Test Set
rb_4273490	AATTTTAACGGTTTGGTACGTTCGTCTGACTTGTATAGCCAATAAGCTCACGGTTCGCGGATTGGACTAGGGGTAAGGCG	14.1699	11.9838	Test Set
rb_412872	CGATAATAAAGGGGCGCGCCGATGTGGGTTCTTTGGCTAACAGGGTAGGAGAGCGAGCACAATCTTTGGAGGTAGGGACG	14.4671	13.3168	Test Set
rb_7322974	TGCGGGTGCCCTCGGTCAATTCCGTGGGGCCCTTGAGGGACGAGCCGTCAGCCCGGTAGTCTAGTGGTTGAGGTAGATTA	14.385	12.8132	Test Set
rb_1775321	CTTCTGTCGCGTTAGTCGTTGAGACCGGCTTTGTTTCCCCCCCCGTGGGCCCATGGGGCACAGGTGGTGACCAGTCCGTC	16.4163	15.0746	Test Set
rb_1813916	TCCTTACCGCTCGCAACTGGCATCTTTAGCCTTTAGACCCAAGAGGGGAGCACTCCCTAAAGCGCGGTGTGAGGGGGCGG	13.5335	11.7597	Test Set
rb_4335249	GTGCTGGCCATGCTGTCGGGCGTACATTTAATCGTGTGGGCGCGGGGGCCTTCACGGTGTGGCTTTAGGGCTCGGCGGCG	16.0964	14.8886	Test Set
rb_890138	TACGGACTGTCGTGGAGAACGCGCGAAATTAGTATGGTACTCGACCACTGTTTTGCGGGTCACGAGCATTTGAGGGAGCG	16.307	15.0904	Test Set
rb_1803863	TTTGTCGAGGCTTCAAGCAAGGGCGGAGTAGGTATAAATAGAGCGGAGATGATTCCAGTTGGACCCTGGACGGGCTTCCC	15.8417	12.2373	Test Set
rb_4373453	GTGGCTACCTATAGTACGGCATCGACCGGACTGCATCGATCTGCGGCTCGGGTGCATTATCTGGTTCCCTCGCGTGCATA	14.3923	13.1866	Test Set
rb_5121223	CGTGAATTTGTCTAGACCAAGCTAAATCTCTTCCGGCTAATTGCTATCTCTAGTTCGGGCTGCGCGTCGTGGTTTCACCC	13.5658	12.4315	Test Set
rb_7460527	TCGCCGGAGAGTGTGGCGCCTATGGTACGCATGTTATGCTGAGGATATTATGGTGGGTTCTCCGTGGTGGGGGAGGCGCG	13.8793	12.6772	Test Set
rb_5468223	GGTGAGCCGCGTCCCTTTCCTGTCGGGTGGGCGGATATGATAAGCCGGGGATTAGGCACCGGGGCGGTTTTACTGTCACA	16.7426	15.4958	Test Set
rb_1017268	TCGGCCCGTTTAAGCCTATGCGCTGGACTGCCGAATGCTGGCCAGGTCGGTAAGGTTTCGTTCGGGACCAGTTGTCCTTG	16.1087	14.3151	Test Set
rb_7218017	CAAGGTTGCGCGGGGTAAAGTGTACGAGGCCGCTGTTCCACCGGTCCGAAGTTAGGTACATCTTACGTCTCGGGTGATTA	15.2452	14.9385	Test Set
rb_7251753	CCGTCCGAGCAGGTGGAAATTTCCACACCGGTGACGCACTTAAAAAGTTTAGATCGGTGCAACGATGTACCAAAGGCCTC	15.9234	15.1055	Test Set
rb_6110986	TTGTAACACGAAGTTGGCTATGTGCTTCCTACCTTTAATACCTTGTACTGGGGCACGTTGATCACGAGTGGCGCACCCCG	13.6817	11.5424	Test Set
rb_5292278	CGATGTCGTTGCAGACGGACGGTCGACCGGACATGTTTGAAGTGTTCGCTTGGAGAACGGGTTCCATTGGGCGGGACGAA	18.1782	15.7722	Test Set
rb_1351029	ATTTATTAGGTAGGCGGTCTCATGTGGGCATAGCCTTGCGGTCTTAATCTCAACAGTTCAGGGTAAGATACGGCGGGCCG	16.5096	14.0044	Test Set
rb_2168325	CTTCTGGTGCGGGCGCTTTGGGTAGCGAGATGCCGCGAGTGTCAATTCGGTGCGGACAAGCTCGGTGAGTGTGAGTGGCA	17.7586	15.2591	Test Set
rb_5633923	TATGCTTGGTCGGGAATCCATTACCCTCGCGGGGGGGGTACATGGACTAACGTCCCGTCGGGGAAACAAGTGGCGCGAGG	16.827	15.9065	Test Set
rb_5021146	TGGTTGTTAGAAGAATTGCGGAGCCGCGATTATCTCGGTTTCATGTGCTTCCGGGCTCTGGATTGAAATCTATGGCAGTG	14.2681	13.0874	Test Set
rb_5389889	TCTAGCACAGGCTCGCGTGTTCCTTCGTCGAACGCGAGTTCTGGGTTGGGGTACCCCGGTCGGGTAGCTCGTCATTGAAG	18.1136	15.7141	Test Set
rb_910764	GGAGGAATGCAAATTCGGGCCGTTCCATGTTTCGTGTACGTTCTGTACACGCCTCCCGGCGGAGGGCGACGGGTTACCCC	18.1615	15.4884	Test Set
rb_5504824	GTGGTCGTGTATCATGAGGTCGTAGGAGGGCATGACCTGTAGCGTCTACTAGGGTGGAGCGCCCAGTCCTGGTAGTGTCG	16.085	14.443	Test Set
rb_3810060	GCTTTCTGTTGGGATTTCGGTAAAACTTAATTGTAGTTCATGTATTTTCAATGGCGCCGATTTTCTCTAGTCCGATCTTT	13.5218	11.7532	Test Set
rb_5044450	TATGTATACGTGTCGGATACTGGCGCGCCTGGGGAGGGTGGAGGTTGGGCGCGTGGGCACCTCAGGCCACCAACGACTCC	15.3397	13.5575	Test Set
rb_16499	GATACTTCATGGGTGTGCGAGCGCAGACTATCGGTTCCGTTGTATGTGTGTACGGAACTCCGCAATCGGGGTCGAGCGGA	14.6015	14.9071	Test Set
rb_6114776	AGGGGGGGCGGATAGCAAAGCGTAGTTTGAGGGCCACCTGTCGCTGGAAGCGCGAAGGGTATATAAGGGACGAGGCTCGT	16.6221	16.0903	Test Set
rb_4124165	ATGGTGGCCCAATTATTCGCTTCCTGGGGCAGTTATATTGCCTTCGGCGGAGCTGATAAAAAGCTCGGCGGACGGGGTGA	14.5429	12.7585	Test Set
rb_5666558	TCTCCGGCGCATCTTATCGGCTTTCACGTTAAGTCAGAATCGCTGGTTGTGTTGGCCTCAAGGCCGGGGACCTCTGTCGG	14.2701	13.7567	Test Set
rb_2234192	GTACGGGAGTATGGCATGGTGCCGCGGAGTACAGGTGCTGTCGGGCAGACTGACGCGCGGAAAACTAGGCACCTGGTTCA	16.7037	14.2212	Test Set
rb_3038417	GCACGTATTGGGAGACGGATGGGCACCTGTAGTCGCGCGGCTCGAGGGGGCGACTTTCTGAGCACAGGGAACGGACATTA	14.9643	14.1881	Test Set
rb_3566016	TTCTCGCGTTTAAACTTTATCCCTATAGTACAGAGCTCATGCCCGCACACTTATAAAAATAAACGAGCGCGTCTGTGTTC	15.8389	14.357	Test Set
rb_7017477	AAAATCCCGTTCTTACCCATGTCCCTTCGTTAGGGTAATTCCTCTCCGTTTGCCAATGTAGGCTATGGATGGCGCCGCAC	16.1328	14.1555	Test Set
rb_4500186	CGCGAGATTTTAGCGACGTCCGACGGGGGCTCAGCTCTGTTATTGGACGTGCCAGACATGGTTTGCCCTGGTTCAGGGCT	15.4063	12.986	Test Set
rb_1103928	TCGCGGGACCTCTGGCGTGTTGGCGTTCGAGTCCTTTACAACGGCCATGTATATAAGTATAAGAACGCCGGACTTACCCG	16.863	14.5427	Test Set
rb_2354132	CGGCTTGCTCAGAACTTCTCACGGTTTCTGGGTGTGCCCAGGCTGATCCGGACGTAGCTGCAATTGTCCTGCCGGCGTGA	15.3269	14.6221	Test Set
rb_6460007	CATACCCGGTATGTTGAAGGTACCTGATAGGTGAACGCTGGGCTCACCGTTCGCGGGGTTGCACGGGGCGCGCTCGACCA	14.5677	13.2169	Test Set
rb_226807	CATGTTTAGATTAGTTCTCGGCGCGTGTGCCTGAGCATGTTGAGTTCGTCGTCCACCCCGCTTGTCGGCGAACAAGTACA	15.6331	14.8591	Test Set
rb_7482559	GTGCGGATTCCGACCGTGCGTCAGCCAAAGGGTCATGGTCGCGTTTACGGGTGCCTGGCGGCAGCTAGTGCCGACTCGGG	15.6742	14.9315	Test Set
rb_1382751	AGAACTAATTATACGTCAGAGAAAATTCCGGATATAAATATGTGGGCTGAATTTTGCGCCGGCAGATGTTAGCCGGGGGA	15.4684	13.9585	Test Set
rb_761606	TTAGGCTGCTCATCGTTCTACCCTAGTGGTCGTCGAGCGCCTATAGTTTAAGACGCGTCATGGTCTTTCCCGAAAGCGCA	14.0841	12.2747	Test Set
rb_5382335	ACAGTGCCCGGAGAGCAAGTATGGAGTTGCAGCCGGTTAAAAATGCCGCCGGCTGGGCCCATTCCTTGTCGCGGCGTTTC	15.6606	13.6709	Test Set
rb_6166115	GTCGTGGCGACGGGTGACAGTGGACGACCCGTATCAGGCGCGTGGCGCGGGGGAGTCCAGGGCACGCTTGCGGAGGGGAG	16.944	15.7666	Test Set
rb_4495358	TGTGAATCCGGGTAATTGTACTTGCGCAATGCGTCAAGACTTTTGATTTTCCTTATCTCCGGCCAGCTTAGTCTATTGTT	17.7475	15.7511	Test Set
rb_2033566	CACTCGACTCTGCCGAGAGGCGTGTTGCGCGGTCTCGGAGCCTGTGTGATTGGTGGCGGCGCAGGCATCTGCGTGCGAGA	17.6298	15.3511	Test Set
rb_3717272	CCAACATGGGGGCTCGGCCCTCGCGCTCCGAAGCAAGTAGATATGGGTGGGTATTCCGCGTTGAATGCGTCCTGGTAGTA	15.7459	13.6284	Test Set
rb_3914651	GAAGGAAGAGCATAGGGTTCCGCACGGTAATCGAGGCCCGGAGGCTAATAGGCGCAAGGGCTCGGCTGCGCTGAGCGAGA	15.3116	12.7773	Test Set
rb_136664	TGATTATTCCGCGGGAACTCCTGTTGATGTCACCGGGTCGCCCAGCCTGAATTGGTCATTCGGGGACTCCGGATCGGCTT	15.2176	14.9535	Test Set
rb_528564	TACACTAGAAGGTGAAAGCGCTGTGTATTCTTAGTGCGTCCGCTACCCCGTCTGAACGCGTTTAGTCGGAGAGTGAACCG	16.0247	13.971	Test Set
rb_6480226	GCTTGTCCAATGAGACTGGAGCCTACATATTCGGAGAGTTTCCATACTGTCTACTTGGTAGGAGGCGAGGGGGCCCGGAG	12.9348	12.2689	Test Set
rb_218589	CGGCAACGGTAGTTTTACAGTCTCATTCGGGGTTGAGACACTTCCGGAAGGTGGTCATGGGACGCATGAGCGGCCACCGG	14.6002	14.0359	Test Set
rb_5168592	TCTGCTGCGTACACCTTCGGGTGCCGCTGGAGTCAGACGGGGAGCTTTAAGTACGGGGCGCGGGCCGCCGGCTACGGCTG	15.8631	14.4292	Test Set
rb_930478	CCCGAGGCGGTGCTTTTGCGTGCATGGTCCGTACCGTGGTGGCTCGGGCGTATCTCGTAGGGACGGGCCGCGGAAGCTAA	16.9759	15.7419	Test Set
rb_3697979	GTTGAATTAAGCGGGTTTTTTCCGATGAGGGTGCGCATCACAGGACGCGAGCGGAAGGGGTTACCGTCTCATCAGGCGAA	17.1188	15.3166	Test Set
rb_6715056	GAATTTGAAACGGGTTACCCAGTGTACTTCGGGAGGACGATTCAGTGCGGTTCCGCGACCTGCCGAAAATCTATCTGTAA	17.7824	16.433	Test Set
rb_1030337	ACGGCCTCTGGGATGTGCTGGGGGCGCCTTGTCCGTTCGCCTGGAGGGGTGAAGCCCTCACTAGCGCATGTTACGAGGAT	15.8782	14.3592	Test Set
rb_3574461	TCGGCGTGAAGTTTAAGCCAATCTTACCGAGAGGGGTAAGATCATGATGATTAGGTCGCCCGCGTATGGGCAGGCGGCGT	14.8222	15.0326	Test Set
rb_6234335	TGAGACGAGGTCCGCCGGCCCTCAAGCGTTGCAGAGTACGGGTGTAAGTACGGCATAGCCTGAGAAGCTGTTCCCCGTAT	14.2739	14.5025	Test Set
rb_755147	TTGGAAATTTTAATTGTTAAAGGCGACCTTGGGAGACGCCCGCACTCATAGCACGGCCCCGAACATCAAGGGTTGATCCG	16.5768	14.7744	Test Set
rb_2685999	CAATCGGAGGATTTGTTACAATACCTAGCGACTTTGCATTAACGGCAGTCAGGCGGGCAACGGAGAGTGAAATTTGCGGA	14.677	12.7019	Test Set
rb_6731160	TTTGCTATTGTAAGTTTAACGGTACACTCTTTTTATGGGGCAACCACAGTTCTCGCCGAACGGTCCCGCCTCCTTATGCG	15.1554	12.9749	Test Set
rb_3070814	CGGGCACCTATATGCCGAGATTATTAGGAAGGAGTCGTTACCCTACTACTACCCATCTGGCGTCGAAAGATCTCGGAATA	17.4738	16.2575	Test Set
rb_2634185	GTGATCATGGAAATCTTGTCTTAACTAGAGATCCGCTACGAGCAAACGGGTAACGCGCGAGAAACCCAACACTCAAACTA	14.7825	14.011	Test Set
rb_2457849	TCGTCCGGGAAATGTTTCGGCCGCCCCCGTGAGTCGAGTGCATGAGGTGCGCGGCCGCTACGGCGGCGATAGGCGAGCGA	17.9813	16.3418	Test Set
rb_6665218	TCGGTACTGTGGAAATTCTTTGTGTTTGGTTCGGAAAAAAATGGGATGAGTCACGCGTATCTGTAGCTAGGACTTTAATA	14.4267	13.3508	Test Set
rb_7454661	TGAGACGATTATATATTCGTAGCGCGGGGATGCTGTCGTTTGGGCTATTGACGGGGCGTGCCGGCAGGGCGGGGAGTGGT	15.1099	14.1742	Test Set
rb_6251400	TCGATGCACGTAGTTTCGGACTCAGCAGGGTAAATTAGTTCGTGGGATCTATCGTAGGGCGCCGAAACGCTTATAACGGA	15.207	14.1615	Test Set
rb_4144002	CGAAAGTTCGTCCAGCTGAGAGTTGATTGCGGCGGGGGCGTTGAACCCCGGGCTCGCCGAAGACGGTGGGCAGTTCAGGA	16.2964	14.8813	Test Set
rb_3741401	GGTTAGGATCAGTTGCAGGGGAGGGTCAACTGTGTGCCGGGGGGGCGCGGGCAAACCAGGGTGCACCTAATTGGGTGGTC	14.5912	13.2902	Test Set
rb_1762344	TAGCGCGGAGGAGGGTCTAGTTAGCAGCGTCTAATGCGGGAGAAGTTAGGGAGCAGGTGAGCGTGGGCCTCGCCTGGGAG	14.5585	13.9299	Test Set
rb_4282441	GGTGGCACGGCGCTCAGCGTGTCTGCTTTTGCTCTTTTGTTGTTGGTCTCATCTCTGTTACGAGCTGGTCGCGCGTCGTG	14.8269	12.4897	Test Set
rb_4789879	GATGTCAGCAGATTCGACGCGGCAGAGAGGTGCGCTCGGGGGTGAGCGGGGGGGAGAGGTGCACGGCTTGGGTGCATGAT	15.9765	14.8637	Test Set
rb_4527397	TTCGTGATTTGCCCTTCGCGGTGGCGGGGTGCGCCCGCACGATTAGGCTTCCCCACGTCAAGCGGTTCGGGGCGGTCCTT	17.3384	14.7584	Test Set
rb_5557061	CCAAGGCGATGGGCTCCAAACGTGGAGGATTTCGGCCACAGGGGGGCCCGGTAGGTCACCTCGGAGCGGTACGAGACGCA	14.8858	14.4911	Test Set
rb_600518	TCTGTCGGTTCATAAGGCCAGCGGTGTTTTCCGTTTCATTAGTATCGGAGAGGGTCGGTCCGAGGAGCCGGTGGCGGCGA	16.3986	14.2235	Test Set
rb_85332	TGCAGCGCCACCAGTATATCCTAGATCTGTTACCCTCACATAGAGTTCGGACACCCCGCCACCCTCGGAGGTAGCCTCCA	17.276	14.9689	Test Set
rb_4947581	AATTCACCTATTCGCCGGGTCGCCGAGGTTCCGAACTACATGGGAAGCGTGGCCAGCCGTTTTGTTAGAGAAGGGGAGCA	13.7149	13.674	Test Set
rb_1495779	TCGACAGCACGTAAGGGTAACGCGCGTTAATCAGGAGTTGGAAGTCGCGTGAGATTCATTGGCAGGTTCACGGTAATCGG	16.5636	14.2173	Test Set
rb_990339	ACTGCTCACGGTCGTCCGCGGTAAAGGGTAATGTGGTTAAGTGGCGCTTATGTGACTAAGGACGAACGGTTGGGCTCTTT	14.1608	12.3056	Test Set
rb_2927966	AGTCTTGCTCACATCTTCAGAAGGTAAGACTCATGGATTGTCCGGCCGGGCGGGGCGAGGAAACAAAGGCGTGGACGATG	14.9145	12.7964	Test Set
rb_4989661	AGGATCGAGGATCCCAATAATCTGACTACCCAGCGTGGTGTCTGGATTGGTTCCGTCTCTGGTCCGGTTTTCGAGGCGCG	15.0757	12.6653	Test Set
rb_7262847	TCGTGAGTGGCAGGATCGACAAGGATGCGCTCTGCTTGGTTAACGTGCGCACCCGAAAAGCTCAACGTCCGCCTGGTGAA	15.2211	12.6934	Test Set
rb_3337911	CCGCCAGTAAAGCACACAATACGCGAATTCGGGAAATGAGGTTGGGCTATGCGGTTGGGCGTCGGGTATAGCTGTGTCCG	16.2909	14.7653	Test Set
rb_5712887	CAATTCGAGGGGGGTTGAAAAATTAAGCGCTCCGACCGATTGGAGGCGGCCACGAGCGCGGTTTTACGAAGATGCGCTTT	17.0995	15.0754	Test Set
rb_710091	GGGCAGGAGGATAGGAAGCCCGTCCGTTCGGGTGGTTGATCGGGTATTGGCCCTGGGATACGCCGGAAGTGAGGTAATTT	14.8467	14.0709	Test Set
rb_6719905	TCGGATAACCTTAAGGTCCGGAAATACGGATCGCATGTTCGGTCACAGCTTCTACAAGTTTCGGTAATGACAGGGGCACG	14.5808	14.5474	Test Set
rb_2093153	TCGACCGTGTTTGGGCGACGCGGAGTAGTGACGTAGATATTCCATGATTCTGAACGGGTGGATGCCGACAGAGGTGCACA	15.4764	13.1986	Test Set
rb_7383700	ACTCACGGGGATTATCGTGGCGGGATGAGCGTACCACTAGCGTAGAGGCCCTGACCGTAAGCCTGAGTGGAGTTAAACCG	13.869	12.8393	Test Set
rb_1259306	GTATTGTATATAATTTATGGATATAGAGACGCAGCTGCTGGTTCCCGAATTCTATATCGGTCGAGGGCAATCGCTTACCC	15.9368	13.1752	Test Set
rb_7118969	TCCAGATCCATGCCCCCGTCCGACCTTCTGCCATGTCGCCATGCCGAAGCGGGCCGGTGTGGCAGCGTGGTGCGTCCCTT	15.8179	14.302	Test Set
rb_4697900	TTCGACTCGTTCATTGAGGTCGCGAATTAAGATGCTCGCGTACGACAGGTAGCCAGCTGGGTCGATCCCCTGAGTGCGGA	13.7721	12.8087	Test Set
rb_3128132	CAAGGTCGCTCGGAACTGGGAGGACGGACGACAGTTGGGCCGTAGGCTCTGCAGAAAGTATGACAGAGGGTCCGGGCAAA	14.1267	12.4842	Test Set
rb_2845727	GCGTCAGGACTACGTCCGGAAGTCACCCGAACAGTCAGAGATGTCGGCATCTGCGGCCGTATTAGGAGGGCCAAGCAAGA	14.4534	13.8505	Test Set
rb_1220067	TCCCGGAAGATTGAGGGATATGCGGATGGCCATGGATGTAACGTTTAAGTTATGGGCCGGGTTAGTTTTATTAGTGCGCA	14.6627	13.2132	Test Set
rb_5373986	GCGTTCCATACGTGGGGCCGCGGAGGGTCCGGTACGCGACGACGTCCAGTTGTGGATTCAGTGCGCGACGGCAGCTTAGA	17.6767	15.5051	Test Set
rb_7471021	TAGGTCGGGGGATTGGTCAATCGTGGGGTGTGCTCTGGTCGGGTGACCCGTTGCCTGGCGGCATCTAAGCGGGACAAATT	16.3929	13.974	Test Set
rb_1419092	AACTTATTCGGCGCCTTTCAACTCGGCTCAGTTACGTGATCATCTCTTATTGATGAAGATCACCCGGCATCGACAATCGC	14.9787	12.9852	Test Set
rb_1846945	GTTAGCGTGTTCGTTTGCGGGGCCGGGCTCCGTCGAGGTACTACGGACCTTGAAGTGGGAGGCTGCCTGCCCTGTTTGGA	14.2439	12.9737	Test Set
rb_6635808	GGACGGTAGGTAAGTGATTTCGTCGGTGCGGATCGGAAGGTCATCCGTCTGCGGAGCTGGTAACGGCACTTGGGTAGGGA	16.7142	15.4648	Test Set
rb_238771	TTGGGTGAGCGGCATCATTGGTGTAGCGCGTCTTCCGTGTCTCGTCCTGGCGTGGCCCCGACGGGGCGACTGCGTACAGA	16.6097	15.6943	Test Set
rb_88118	GATGTTGCGGAAGCCGGGGACAAAGGGTGGTAGCCAACCTTGAAGCGGGGATTGTGGAGGGAGGGTCGTTCTTGCAAGCG	14.1685	13.8645	Test Set
rb_3250132	CGATGTCGGCGAAGTAAAGTAGCACGGATGTGTTGTGGTCGGTCATCGGTAGGCCGGAGCTCGCTGTTATCGAGGAGGGG	15.0578	14.2088	Test Set
rb_3582436	TCGATACGGCATGTTATTACGAAGCCATCTATGGTCCGCGTGAACGGGTAACATATTTCTGGCACGTGCGGCCAATCAAG	16.271	14.1159	Test Set
rb_5586811	CATGGTTATAGCTACTCGGGTATATTTTGGTCCGGGTAGGGTGATTTGGGTTGTTTCGTAGTAACGAAGTTGCCGGGTGA	15.4098	13.9451	Test Set
rb_1498187	TGCGAATCGGAGGCCAGGCTCGGGCACCGTGGGTTTTAACGGATGGAGTTCTTTATCGACGCGTTGTCGGGGGGAACCCG	17.2219	15.0584	Test Set
rb_362194	GGCCACTCGTGCGGCTGTTTTTTTAAGACCTCATGGCTGCGTCGTGTGGTGGGTGGTGAACGGTTCGTAGGGCACGGAGA	14.873	14.0877	Test Set
rb_6786772	TCTGTGTCCACGTATTAGGTAGGTGCGAGCGGACCCTCTGATGCAATGGTGTCCACCGCTAATGAACAGGGTAATCCGGG	14.9282	13.0894	Test Set
rb_1459129	GTCGTTTGGGGTGTTATGGGGCGTCAAAATTTTCCCGTCGGATGCAAGGCGCGAGCGGAGGCCTACACAAATTGTCCCCG	16.8686	15.3048	Test Set
rb_4296481	CACCCTGGGCCGAGGGCCGGGCGTTCGTGTCTGACGCGCGCCGGGAGGGGTGTGGCGGACTGAGTGGCGTTGGTCGTGAA	18.6884	16.0375	Test Set
rb_1428658	CCCTGGAGTGTGGTGTGAGACCGCCGCGGGTCGTAATTGGGCCCGGAGGGGAACGCTTTCAAAGGGCCGGCGAAGGTGGG	16.0537	15.1705	Test Set
rb_3069305	GGGGTAGGCGGGCGAGGTGGAGGAAGCGGGGCACGATGACAAAAGAGGCTATGTAGGGCACGTGGAACTGTGGTCGTGGA	16.4926	14.1323	Test Set
rb_6272290	GTTTTAAAGTTTCAAAGAGAGCAAATCGCCCGAGGTAGGGCGTTCTGTGATGATAGAGCGACGGCGAGTTCATGGAAGGG	14.3025	13.7389	Test Set
rb_2535608	ACCTTCGACCCTAGCCTTTGCCTCGAGCTCACTTTGTTTACTTTCGGCTCGGCCACATCTATTTTCTCAATTTTCAAGGA	13.075	13.0317	Test Set
rb_2685884	AGAGGTGTCTGTGTGTGTGTGAATCATCTGTTACGGTCCGCAGACTCATAGGCCGGCGGGCGGGAGTTGGACAGTGCGTT	16.7889	14.9571	Test Set
rb_527744	GTAAGGAGACTTGAAATTAGTTACATTACCCTAATCGCCATAGGATATTTGTTTTTTTGAGTTCCGACGAAGAAGAAGGA	15.143	13.7028	Test Set
rb_7141574	ATTACCCGTGGCATTTCTGGCCACTGTGTATTGAAGGGGCCTCCTGTATCTATAATTTGTCGTGTCGGGCTGACGTAGAC	14.0121	12.4818	Test Set
rb_5239183	GATCCATTCGGAGATTGCTGGTGGGGGCCCGCCGCTGCCAGCGAGAACGAATTTGCATTATACAAAGGCGGTGGCGCCGA	15.1238	12.9523	Test Set
rb_4329001	TGTTTGAGTGGGGGTTACGTTGTGTTTTGGGTGTCTCCACGGAACGGATTTAAGACGATGCGAGCTCGAGCAGTCTGGGG	14.1915	14.3493	Test Set
rb_5232919	GTTCAACGTTCCGCGGTATCTGCATGGGATGTAAGCCTGTGTCGGGGGCGCGCTAGTTTCACAACGGGTATTGCGGCACA	15.4403	13.6529	Test Set
rb_2251227	CGATTTATCGCTGGAGACTGGCGGGTAGAGTAGGCTGACAATACGGGGGGGTAACCCGGATTCGCGGAGGAAAACTGGGC	16.3857	13.5261	Test Set
rb_4558545	TTCTTATTTTTGCCGCGGAGGATAACGGCGCATATGGGTACATAAGAAATTTAAGCCTGGTGCACGTCGCGCGTAGGCAG	16.6609	14.577	Test Set
rb_5312333	CTTTCACAGCCTTGAGTCGCATCGGCTTGTCGGCGCAGGTAATCCGCGCTGTAGGAGAGTCGCCGGCCTAACAGTGACCA	15.2475	13.5044	Test Set
rb_6589348	CTTGGAGATATGACCCGGTTATGGTTGTGTAACCCCGCCATAGATTATGACGGGGGACGGTCAGACACGGGGCTACGCGA	15.1963	15.5623	Test Set
rb_5018032	CGGGGTGTTACCGTGTGTGAGTGGCCATGGTGGTGTTTCTCGGTGGTCCGGGTTGTAAAATCGGCGTTGGAGGCAGTGCA	15.1171	14.6529	Test Set
rb_2144634	GCTCGGTCGAGCCTAGCTCTGTCGCCCTTTGGGTGCCAGCATGCTTCGCTTATCTACGGCGGGCTTGCCGGGGCCACCGG	14.9907	14.4611	Test Set
rb_2037769	CCGGGCGTGGGGGGGGGCCAGCTATAATCCTTGTTGCAGCCTGTTGGAGGGGCGGATTGCGCGTCTGTCGAGAAGGTTGG	14.2701	12.5564	Test Set
rb_6208017	ATATTGTCGTAGATAACTGTTTATGGTGTTTACCGAGTTCCAGTGGCCTGCGCGGCGAGTATCAGTTTGAAACTTTTTCG	15.1376	13.1892	Test Set
rb_6320890	GCGGGCCCGATGCATTCGAGTCACTGCAGAGAGGGCTGTCTATACGAACGTCTTGCGGCGTGGCAGTAGCCATACCGAGG	13.202	13.1692	Test Set
rb_2906527	CGGTACCGGTGTCCTATTTCCCTGGTGGGTAGATGCGTATGGGTGTTTGTTCCCTGGGTTTCGACGCAGCTCGCCTCGTA	16.2806	14.7945	Test Set
rb_2733757	GCGTGGTGATTATGTCTGGGTGCAGCGGCCAATGGCGCTTCTTATCTATTATTATTTGTCCTTATTTCCTCTGCGCGGAA	17.3736	14.554	Test Set
rb_3286722	TGCCATGCTTACGCCAGGTGCCTCATGATCCGCTGCCACGGCGCGTAGCTGTGATTGTTGACCTGGGTTGCACGCGTTTC	14.9239	13.3966	Test Set
rb_6279285	CGGGTAGGCGACCGCGAAAAAGGTGTTTTGATGTTCCAAGGTTTCGTCCTTGCGCGCATGGGGTCGGATGGTTCTGGCCA	18.7226	15.7239	Test Set
rb_887207	GTTCGTAGCGACATGAATCTCAGTCGTTTGTACTTGTCACTTGTTAGGGTCGTGGACTTGGGGCCAAGTGGCGGTGAGAA	16.3891	14.0512	Test Set
rb_1868072	GGGGGGAATAGTGAGTCGCGACCGCTTGGAGGCATGCGGTGGTGCGTTGGGCACGGCCACTGCGATCGTCTTGAAGTGGT	15.0579	14.7467	Test Set
rb_803036	GGCAGCGGGGTTTATAAAGAATGTGGTCTCGGATGTTGTGGGTGGTTTGTGCGCGGGAGATACAGGCGGCTCATTCCGCG	15.8408	14.2643	Test Set
rb_319940	GAAAGCTGCGCCGTGTCCCCTGTTACCGTTCATTCCAAACCATATTGGCGAAAGTGCTTTTTACTTACGGACTTATCGTT	14.7885	13.2933	Test Set
rb_1067555	CGCCTTAGGTGGGACTGTATGTGCCCAGGGTGCGGGGCGTCGCCTCGAAATGATCGGGACCCGGGGGTACACTTGTTGGA	15.1718	14.4009	Test Set
rb_5669868	AATGATAGGTATAGTCTGTGGCGCCCGGGCAGCGAACGTGCGGGTGGCTGAGGCGTGGAGGGAGGACACGGGGCGATCGA	16.112	15.213	Test Set
rb_6140352	GTTGGGTTCACAGTCGCGGAGGAGGCGCGGGCCTGGTTGAGGAGCGTAATTGGTGACCAAGCGTGATCCGGTCGACTAGA	15.6363	14.9077	Test Set
rb_1188271	TGTTCGGTAGGGGGATGCGGCAGTCTACTGGCGTTGAGTGTAGCGGCCGTGTTTAATGGCTCGGTTCGTGCGGGACGTGC	14.247	13.9718	Test Set
rb_4434279	GTGGCAGCCCTATGCATGGAGTCTAAAACTTGTAGGGCGAAAATTGTTTCGGACGAACTCCTCAGCGCGTCCGGGAAAGT	15.4981	13.4236	Test Set
rb_2186268	AGTCGATTGGTCTGGCACGGGGAGCACCCGCCGGGGCTTCAGCGTTGGATTATCCCGGGTGGGCGGGGTCTGAGTACGAG	15.7199	14.8783	Test Set
rb_5148386	TGGGGGCGGCGGCGTTGTGTAAGGTGACCCGGCATGACGCCGTGTCATGTCGTGTGTTGGGTGGAGTGGGAGCGGCCGGC	17.0985	15.9391	Test Set
rb_802753	CAGATTCACGCGGAGCCCGAGAACGGGTAGCAAGATCGTTATAGTCAGGGATGACAGAGCCTGTCCTGGGCGTAGCGGGG	14.7044	13.6649	Test Set
rb_7033590	TCGGGCTCAAGTGGCGTCGCTACGCGCTGTAAGCGTAAGTTCTTGCTACACAGCTTTCTAGAGTCGCTAAGGCGGCCACT	13.6148	11.8821	Test Set
rb_5540467	CCGCAAAACTAGACCCTTAGCTTGAGCCGGCTTTCTAAATGCCGTTAGGCGACGGGGATTGACGGGGTGTAACGTGATGC	14.4196	13.7717	Test Set
rb_2939702	ACATAGGGGGGGATTTACGGAGGGATCCGCGGTCTACCGACGAAAAAATCATAGGGTCACTGGAGGTCGCGAGGGCTGGA	15.7707	15.3318	Test Set
rb_4928860	CTGAGGTGAGCGGGGTGGTAAACCGAATTGGGATAGCGGCCGTGTGTTTTTGTAGTACCTGTAGCGGGAGGGGAGTGGCT	14.7362	14.3309	Test Set
rb_5259633	GCTGTTGCGCGGCGAACTTTAAATAGGATGGGAGAAGACACGGTCGACCTACCCGGGAGCCTTCAGGTGCACAGGAGAGA	15.3776	14.5545	Test Set
rb_4778110	TTGTTGAGTAGACCGCGTATTCAGTGCGACCCGCGTGACACCGTCGTCCTGGACTAAGGGCGGGAGGCGGCCTGTACTGG	16.5301	14.6587	Test Set
rb_213224	TTAGTCCCGCGTAACTAAGCCCTGTTTTTGGAGATCCTCGGCGACGGGGGTGATCTGTCACTGAGTCCTATTGGTTTCAA	15.3381	12.9933	Test Set
rb_6133672	GGGTTAGGAGCGTTGCTGTACGCTACGACACAAGCGGGGGGTCATAACCCGCCGGGCACGCACGTCGAGCTGCTAGTGGA	16.9447	15.0865	Test Set
rb_6306725	AGACACCATGATCCGTGGAAAGCATGTGCCTTTTAACGCGGCGTTCCGTGCCCCGGCGTTGAATACACCATAGCCTGGGA	15.4249	13.0099	Test Set
rb_4183689	TGGTTTGTCAGGCAACGGAGGTCACGCTCGTATTTTGCCGCGTGGTACAGTTAGTGTTGTATCACTTTGTAGTGCTACTA	14.4536	12.7507	Test Set
rb_2532297	TGTCAACATCGTAGGAAAGACGGTCGCAGTGTTGGCTTTGCGGCTATACGGTGGAGCGACGTGACTGCGGCAAGCTCGGG	13.4897	12.7688	Test Set
rb_7231959	AGGATCGGTATTTTTGGAGCAGCGCGAGGATAGCAGGGGCGCTAGTCAGACATTGGCGACGGCTCTCGTGGTGTTGAGGT	15.3892	13.6526	Test Set
rb_4393901	TGGTGTCCGGGAAGTGACTTAAAAGTCCGGTCGCGGAGTGCTGTTCGAGGTGGCCAGGGTTCCTAGCCCGAGCGAGTGTA	15.5324	15.1576	Test Set
rb_903487	GTTGAATTAGGCGAGTTAAGCTCCACTCGGTTCGTAGGACTCCACGCGGGTAAAGGCGGCGTGACAGGAGATCAGCTCGG	14.9381	13.3056	Test Set
rb_6416903	ATTCTTACGAAAAGCGCGATATCGCGTGTTCCTTGAACCCGCGATTCCAGACATGTTAATGACGGACTGTACAACTTACT	14.2125	12.972	Test Set
rb_772214	GACGTGTCTGAAGATGCCGGGGCAAGGCTCGTAGGAAGGGCCTGACGCACATGCTGCCCCTCAATACTCGTTCGATGCGA	13.8464	13.8017	Test Set
rb_2267900	CTGGCGGGCGCGTACCCCGCTGTTCGTATAGAGTTAATATTCGACTTGTGCAGTTGTTCGCTTCCAGTCGACTGTGTGCT	14.3177	13.3497	Test Set
rb_4368847	GTGTTGTTACCTACGGTCTTCAGGAGCGTAGTTAGTAGGCGTCAGAACCCGGGTAACGGAGGATCGGTTCCGGAGAGCGG	16.9136	15.5474	Test Set
rb_5954358	CATGGTTTTACTCCGCACCGCCAGCCATACGTTAGGAGGGACAGGGCGTGTGAAAACATTGATTGGTTATGGGCATTCGG	14.5577	14.4425	Test Set
rb_7449364	GGCATACTTGGATCGGACACTTCAATTTTGATTTGATTTTTATTGGGCCTATGGAGTGCGCGAAGGGTACTTACGGGGCA	14.0189	13.6222	Test Set
rb_1723046	CATGATGCAATGTGTTGGACAAATAATGAGGTATGGGTACCGGGTAATCCGGATCTGAGGTAGTGAACGGCAACGCGCCA	16.5934	13.4309	Test Set
rb_7226439	ATTTGGAGTTGCGTGTTGAGCACGCGCCTTTAGATTCGGGTGTCGCGTTTGTGCATGGGTCTGCTTATACACGACGCCGC	16.0731	14.1811	Test Set
rb_1143583	GTATCTCTGGTGTTTGATGGGTCGCTCCCAGGCATGACTTGACTCCGATCTCGGTCCCGCTACAGGCAGGGGCGTACGTC	13.5716	12.9436	Test Set
rb_4628878	AGGTGTGGGAGCCTACTTTTTACCAGTTAGCTCCGGGCCCTTCGGAGGGGTCTGAGGCCGTAGTAATGCTTGGTGGGCGG	14.0654	12.94	Test Set
rb_20291	GTACGAAGATGCATTTGCCGACGGATTTATTATCATGCTCCAATTATCGCGGGGCTTTCTTTCTAATCCCGCAGGACCAT	15.3186	13.6203	Test Set
rb_2796635	TCGAGCAGATATCGTTATGCGGGTAAGATTATATTTTCAGGTTTTATATACATTTAAAAGTTGCTTTGGTTCGGTATAGT	15.2871	12.2749	Test Set
rb_1539646	ACAAGGTAATAGGAATAGCGCGGGTTTTGGGAGGGAAGCTCCGGGCTCGGGAACCGGAAAAGGCGACGGCGGCGCGCTCG	16.7538	14.6286	Test Set
rb_55804	CTATCACCGGCGTGCCTATGCGGGCGGTGGGCCTGGCGCGGATGTTGCGAGTCTAAGTAAGCGTACAGGGTGAGGTGCGA	14.9027	13.647	Test Set
rb_4523457	GAAGCGGAGACTTAAGACTTAGGCCCAGGTCGCTCTGGGAGTAAGGTTACCCTAGTAGTCGAGGTGGTGTAGGTGAACGG	15.5388	14.111	Test Set
rb_5694840	CGGGAGCTGTCCTGGAATGCGCTACCCGGTCCCAGTAATAAAAGGGTACAATGATTTCGGAGTGTGGCTCGCACTTTGTT	15.969	14.0734	Test Set
rb_170617	CCACAATGTGAAGCTTCCATCTTTCATCGTCAGTACCTGACCAGAATTACCCTCTTACTCTCGCGAGACGGCCAACCCGA	13.4941	12.4613	Test Set
rb_446131	GCGAGGACTACCGGAGAGACCTCCATCGGGTTCCATGACAGGAAAAGTCGCGAGTGGGCAAGGACGGGTGTTGGCGCGTG	16.7781	15.0831	Test Set
rb_4714342	ATAGAAGCTGTGGCGCGTGCGCTCAGTGGCACGAAGTGGGGAGCAATAGAGTGCGGGTAATGGGCGGTCGGGCGTGCTTG	18.1331	15.5316	Test Set
rb_6192860	CCGACGGGTGGCTGGCGCTGTTGGAGGCGCTTCACAGAACAGTCGACCTAGGAGGGGCGGCGCAACAGGGAGGCGGTGGT	14.5643	15.2549	Test Set
rb_864986	CACGCGTAGACGTCTCGTACTAGGCGCGGGTCCGGATTGTCGAGCGCGTGCAGGACGTGAGGCGGGCTCGGCGCAGGAGA	17.3641	16.143	Test Set
rb_1472679	GTGTCGTTATACATCTCGTGGTAGCTGGGGTCTGTGTTAGGGCTTTATTTTTTCTAATCGCCAATTCCCAGGTTCGGGCG	15.711	13.5834	Test Set
rb_294968	TTTTTCTCGGGTGGCGAGTTTTCCAATTTTCACTATGCGCGTACAAGTCATGCAACGAACTAGTGGACCAATCAATGTGA	16.1753	13.5104	Test Set
rb_6839769	TTGGCGGGTAATTCATGTGTCATGGCGCTCGGCGGCGACCTGAAGATAGGATTCACTGGGTCGCCGTTGGGACAGGGCGA	17.2307	14.8499	Test Set
rb_5080931	CTGTGGCAGCATGGTACTCGCGTGTGTAGACGTGAAAAGGGCGGATACAGAGGGACGTGACGCCGGGACGGTGTGCGGAG	15.0754	13.9284	Test Set
rb_1107341	GGGACCAAAATGGTGGCGGCTTATTTCCTGTATACGGTTAACGTAATTGCGGCCATGCACGGTCGCGCGCCCGAATGTCA	13.9524	12.9964	Test Set
rb_1573918	TCCGTGTGTGATGATGAATTTCATCGGAGGGGCAGGTCACTTGTTCTGACAGCCCGGCACTCGGGTGATTGAGGCAAGTT	18.9743	16.2448	Test Set
rb_2304775	TCTCTCATCGGTCTTTAGTTCCGTTTGCGGTGTTGTTAGGTCAAAAGTGGTCAGTTCGCGTGGACACTCCGTGTTTGTAG	14.9782	14.2204	Test Set
rb_3369339	ATTTGCCTGCGGGAGAGCCGTCCTAAGCTGTGTGGTCGCGCGGTCCGCGCCTCACAGAGCAAGACACAGATCGTGGGTTA	15.1097	13.3665	Test Set
rb_724062	GTGTCCCCCGGCACTTCAGTCTACTGGGCGCCGAATCCTCACCGCCCGTTGCTCAGAGAATACGCGAAACAGGGGCTCCA	15.8947	14.946	Test Set
rb_1112068	CAACCGGTGGATATCAACATTGGTAGGTTGACTGGTGGCTGGGTGGCCGTTGTGCGGGCTTGGCCCTTGGTGTCAACGAA	13.9747	10.8592	Test Set
rb_4926466	TTTCTTAGACATTTTGCCGATATCCGTTCTAGGCGACACTTTGTTTACGAGGTGGAAGCCGGAAGGATGCGTCTCGCCGA	16.8738	14.8702	Test Set
rb_6779300	TGAGCGCGGTTAGGTTATATTTCGGTCTGCGCTGGGTCCTTCACGCTTGACATAACCGTAGGCGGTCTCGGCGAACGGTG	16.2906	14.8296	Test Set
rb_6928929	CTGCGTACAATAACGCGGTGGTTTCGCCCTGCGTCGCCTGCAGAGGGACCCCAGGGCTCCGCTACGCTCGATGCCCCCGG	14.1511	13.5938	Test Set
rb_5465425	GCATTCGGTACGATGGTCGCGGTATCATAAGTTTTTGTATTCCGTCGCTCACCTCAACCGCCGGCGTGAGGTGTGACATG	16.3572	14.7967	Test Set
rb_3889104	ATCAGGCGCGCGAAGGGCCCTTGAGGACCTGCGGCGCATGTGATGGCGCCACGGGTGTCGGCAGGATTCGGGAGCGAAGG	16.7863	15.6595	Test Set
rb_4038694	TCCGATGTCAGGCCCCCGTACAAAGTCACGTTTATATTGTCCAGTACTAGGCGGGAATGAGTCGCCAGTAGCTGTGGTAG	14.6401	13.7251	Test Set
rb_6820791	TGACCGTGCTGTGATCTGATGTCGTTCCTAATTCGTCATTTTTTCTTTTGCCGTTGAAAGGGTCAATGTGTAAAGTCGTG	14.311	13.4232	Test Set
rb_997460	AGTTAGAGTCGCGCGAAAATGGTATGCAGTATCGGGCGGGTGTAGGGACGTAATGTCGCGATTGCAGAGTCGCCTGGTGT	15.9462	14.0629	Test Set
rb_3694961	AATGATAGAAGTGCGGACGCCGAATGCTCACGGCCTCAGGAGGCAGGGTGACACGGCGACACGTAGTGGGCTGAGCGTTA	17.0057	14.7902	Test Set
rb_299534	TATTTGCGGCGGGCGCGGGCGGTGTGATGGCTGGAAGGTCGCGCTCAAGGCCAGCGACCAAATTAACTAGGAGGCCTTAT	16.7896	12.6863	Test Set
rb_6636982	TCGTCCCGGAAGCGTATATATTGGGAAAACCGACGACCCTTGGAGATGGGGCGGAGCGATGGTAATCTGAACGCTCTCGC	15.4952	13.9025	Test Set
rb_280244	CTTCGCCGAATTGACCTCTTCCAGTACCAGTTCTATGGGCCGGTATTGATAGGGCTGAATCAGGCACGTGCCCGCAGGAG	13.6039	12.1647	Test Set
rb_4495370	TCGTTCATATAGCCAGAGAAACGTACATCGGGCTATTGACTCGGTCTCCTTCGACGATTCGGGACAGGACACTCGCAAAT	15.3948	14.4792	Test Set
rb_3086576	TGATACTTCTGTCGTAAGTTTCTATTGGAATTGGCTGGTGGTACTATCGGCGTGGACTAAAAGGCACTTTCCGGGCAACG	14.0361	10.9497	Test Set
rb_6751292	AGGTTGGGACGGAGCACTACGCGGCCAGCCGAGATACTCGGACGAAGTTGTTTTGTGATGTGGGGTTTTTGGAGTTCGGA	15.8002	14.6733	Test Set
rb_1894518	CGTACGGCCGGGCGTATCTCGCTGGGTTGGATATATACGAGTGCTTCACCGGGGGAAGGGTGGGTTCCGAAACGCTGCTG	15.1145	13.8504	Test Set
rb_7494591	GAAGCTTGTATGATGAGGGTTAGGTGCGCGCGGGGGGTCCCGTAGAAGTAACGACGGGTAAGCGTGAACGGACACTAACT	17.0886	15.4256	Test Set
rb_5638478	TCAGGGGACCGAAGAATGAGGGGAAGTGGGTCAGGGGCTTGTGAGGTTGTGTCACGGGATCCCTCGGCACGGTGCGTCCT	14.7343	15.3751	Test Set
rb_3972993	GTGCTGGTACTAAGTGACTTTCCGAGCGGCGAGTGAACTCTCGCAATTCCCGCAGTCGGACTGTTGTGCGTGCGCTCAGT	16.444	14.6213	Test Set
rb_586947	TCCTTTAAGACGGGTAGCTACCACGATCGGTAGGTGCCTTTGCGGTGGATAATGCGGGCTTGGGACACGTGTAGGTAGTA	14.5282	14.0615	Test Set
rb_1674630	CATGCAATGTAATTTGACTGTATGGAGGTCGTCCGGCGGGTAGGAGCGGGGGGCGCATTAGGGCTCGGCGGGTTCTCGGG	14.6681	12.8791	Test Set
rb_6323134	GGATCGCTGTACACGCGGAGGCTGGGCTTGGGCGGCACGATTGTGACTGCCCTAGTAGCTAGATTACCCCGAGGCAGGGA	13.9294	14.3864	Test Set
rb_1992725	TCCTTTGTGATAGAAATGGTGAGTACGAGGGTCATCGGTTACGATCGGGTGTGGATGAATGAGTCCGGGTGAGTTGACAC	14.1093	13.4612	Test Set
rb_7482003	TAAGGTCGCGGGCGCCACAGGGGTAAACAGGAGTCTATGCGCGGGACGTGCGGGACGGGGAGTGGGCGTACTCATAGCTT	16.0473	15.4492	Test Set
rb_4118045	ACGCGGGTTAGAAAAATTTTTCCTTATTGTGATTTATGGATGATTCTGTTATTTAGATTACGCTGCCGTCATGAACCCGA	15.1008	12.5644	Test Set
rb_3041623	TCGCGGGTATATTGCGCGTTGTTTGACGAGCACGCGTAACCGTATAGCCTGTTGATACTGGCCCGCGGCGAACGTGAGTT	16.3176	15.2762	Test Set
rb_4575777	GATTTCCATGTCCCATATACCGATGATGCTTAAGCGTACGTGAGGTGGCGTTTTGTCGGGTAAGGAGGCGCGCGCGTAGG	14.5397	12.198	Test Set
rb_7285517	GAAGCGTTTGTTTCCTCGAAGAATCCGGTTTTTATATTAGTTCGTCGGTCTGTGTCGCATTTCGGGTTGTGTGTGTTTCG	14.874	13.1058	Test Set
rb_3303852	TTCGTCGGAATGATCGCGTTTCCAAAAGGGGGCGCGGGGCCTGCTGATGTTGGTGCCTCGGTGATGTGCGTTGGACTGGG	15.3824	14.7915	Test Set
rb_5688278	CTGTAAGTGTTGTTACCGTGGTTCCGCGCGTCGCTAACTCAGTGTATGAGACGGGGGGAAGTGCGGTACGACGGCTGGGA	15.3658	14.2844	Test Set
rb_6726048	AATGGTTGTGAGTACGGTTTCAACTTGCGCACTAAAGCGGCCCTTGGGCACCGCATTTCTCGTTCCCCGCTTGGTTGTTT	14.7408	14.2417	Test Set
rb_3575885	GGCTCCGTTAACCAGAATTTGTTTTCGCCCTAATTCACTTCTGTCTCCCGGTTTTTTATCCTCGAATGTACTTACTGGGG	14.5504	14.5835	Test Set
rb_2153998	GCTGGTACTATCAATGGGGGCGGACATTGGCCTAGGGTACGGGTAATGGGTGGCGGTTCGGCCGTACATGGAAGGATGGT	15.5997	13.7673	Test Set
rb_376208	TCGGGCGCACCTGCCTTCACATATGGCGAGGGAGCGGTTAGGCTTTGATTAGCGCCCTGAAAGGGGGGCACCGGTCGGTG	14.1441	14.0599	Test Set
rb_6347406	CCATGGGTGACCAAAGGTGCGTGACCGCGACGCGGGTTGGTCCCTGCACTGGTGACAATGACCCTGGGCGCACCATCTCA	15.6839	14.8262	Test Set
rb_4679200	ATTCGTCCACATAGGGCCGTTTCGTATGTTTTCATTTACAATCAGGGGGTCACCCGGTAGGTTCTTGGTGAGGTAATCTT	15.7992	14.4952	Test Set
rb_7052283	ATACTTTGGTGTCAATATGCACGGCACAATCGGCTGTTTTCTTGTGCTCAACTGTCGGGCAGCGGAGTCGCCCTGGAGGA	16.7818	15.0425	Test Set
rb_2476076	CCCGTAAGTGCATGTGTTCTTACAGGACATAGATGTTGTGGGGATAGGGGCGCGTTACCCGGTCTGGGGATTGCAGGGTA	14.5638	13.2908	Test Set
rb_6192289	ATGGTTTATGCGTCGTATATAAAGGTGGCGTTCGGGGCGTGATAGGGTCCCAAAGCGGCCGCTGGATGCCCAGTGTTTTA	16.3801	14.5167	Test Set
rb_2374074	CCGAATTGTTTACAGTTGACGGTTGCAGACTTAGGCCCCATGGGTCCTGCGGCCGACTAGAGAGTTCGGATGATAGTCGA	10.2122	9.78919	Test Set
rb_4857820	GTTCTTGGTGCGCGCTGACTGGTCGCTCCCGCCCGGGGCCTATAGACGAATCCAAAGTGTGAAGGGGACCGTTTAGTGCG	16.7444	14.4081	Test Set
rb_1092984	TGCCGTTATAGGCAACAGGTTAGGTTATCTGCAATCACGTGAAGCGCCCCGAGGCCTTGTGGTTTTAATATCTGAAGTAG	14.5268	13.6601	Test Set
rb_1823146	TTTATCCTACGCGATTTAGAGAGTTTGCGGTCTTCGAGTTGTGTTGTAGGTTTACCCGTTTCCACGCGGGGGCACGCACG	14.5448	13.2105	Test Set
rb_1850475	TCATAACGCGTATAGTTTTGGTGTCGTCGTGGGGATGGGTGGAGCGAGGCGGGCCTAGCCGATGAGGGGCCGTCCCGGAC	17.8458	15.9654	Test Set
rb_5014901	TGACATGGGATTTTATAATACGGGCCATTCTCGAAATCTATCTGCGTCCAGGTTAATGAGGGTAAGTATATCGACGATGC	15.063	12.7525	Test Set
rb_3434657	GCCTCGTGATTCGCTGGTACACAGCCCCGCGCTGAGTGGCAATACTAGTCGGACCTGGTTGGAATGCGTGAATGCGTGGT	15.2777	13.6792	Test Set
rb_6825712	TTGGGGTGAGCGAGGCCTCGAACAGATAAGACCGTGTCTAATTGTCCAAGGGCCCGTGTGGCGCGACCTGCTAGCTGGTC	14.8377	12.6925	Test Set
rb_1972814	TCCCGCGCCGGCCTGATGAGGCGACTGTCCAGAGCGCGCGTGACTCTAACGGCGCCCATCGTCGGGTTCGCCCCCGCGCA	17.959	16.6651	Test Set
rb_4479857	TGTGAGGCTTGATCAGTCGGGGTGGTGTGAAACTGGACGGGTAAGGGGTATCGCTCAGTGGCGGTTCATCAGCATCTCGT	14.9562	12.7553	Test Set
rb_6572480	AACAGTTCGCGGCGACATGGATTCGGCGAGGCGGGCGGGAGTCCGTTGAAGAAGGGGAGTGGGATACAAATGGTGTGCGG	15.0682	15.1772	Test Set
rb_5769042	TTTAGTGGATGTTACGGGCAAGGGCCCTAGCACGGATTATCGGCGGGTTACTAAGCTTGCGCGAGCGTAGTGTGCGCTGA	15.4908	13.1689	Test Set
rb_5634180	TCCGCGGAAGAGTGCTTTGAAGTGGCGTCCAGGTGCCGTGAGTTGGTCCCAGGGGCGTACGCTGGCCGTCTTCGCCCCCG	17.1354	15.8955	Test Set
rb_3587790	TACCGAGGGTCTAATCGGCGATCGGAAACCTTGGGGTCTGATTTAAATCCATTTCGTTTCGGCACCGCGCCTTCCAATTG	14.5896	12.8126	Test Set
rb_3834516	GTGTTTTTCTAGGAAATGAAAGGTGCGCGTGCGCGGCGGTGAGAGCGGGATGAGATTGCGACATGGTCTTGGGGTTTCTC	16.7759	14.3753	Test Set
rb_441955	ATTTGTTGCCGGACCAGAGAGACGGGCCTTTCGCGCTGCTACTCCAGAAGGAGGTTAGAAGTCATTTTCGCTCGTTCGAA	15.3844	13.6851	Test Set
rb_333485	GGGTGAACAAGGCGGGCTATGTGCGTTTTCCGGAAGTTACCATTATTTTTTAGCCTAATATTCAATGTGTTTCACGATAG	14.2509	12.6797	Test Set
rb_5585389	ATTCAGTGCGGGGATAGTGGTTCCTAAGCTTGAGTGCTTACCCGGGCTTTGGTAGATATTTAAACTTGTTTGAGGTGCTG	16.929	14.4423	Test Set
rb_2020657	TGCATGAGTCGAGCTCCGCGGCCTCGGGGAGCGCCAGCCAAACTGGCGCGCAGTGCAGAGGGCGTAGGAGGCGCGTCTGC	16.0325	15.0624	Test Set
rb_2456977	CAAGTTGTAGGCCGGATCCGGAGAGCGTGATCGCGTCGATGCTTCTCACATATGTTCGGGGAGAAGTTGTTGGCTGTGGG	14.9403	13.8558	Test Set
rb_450949	TGGGCGTGTTATGGGGGGTAGGGGGAGGGCACGGGAGGCCGAGGAGGTTGCGGTAGAGCTGGGCACGTGAAGAGTTTATG	15.0888	13.9997	Test Set
rb_1647480	GACGTAAGGGCGGACGTATCAGACCGTGTCCATTTTTCTTGGCCAGCGATTCTCCTCTCGCTCCGTCGTCGAATTCTGGA	17.0027	16.3066	Test Set
rb_5304230	GGTGGGGCTGAAATCCGACCGGCCACGTGCCATATGAGTACGTTGTGGAACGCGAGTAGGCGCGGGGTAGTCTAACATGT	14.0753	12.7081	Test Set
rb_6682603	GCGCGGAGAGATGTGCGTTCATCAAGATCAAAATATCCGTGTAGTACAGAACGCCTGAATGGTCGTCTCAACCTCTTTTC	16.1062	12.659	Test Set
rb_1785218	ATATGAGTGTTTTGCCTTGATACAGCGCGGCTTGATATTTGAAACTCCGCGGAGAAGGTCGAGGCCGTCTACCGCTGGCG	16.2293	14.3835	Test Set
rb_5838362	CGGTCTTCATACTTCCGGCTCCCGCGTTAGGACAGTGTCATTTCTTTTTTGGATTCTTCACTTCGGCGATGTCGCCACGA	16.1843	14.7622	Test Set
rb_3145222	AGGCGCGCTCCTCGGCGTCCAGGACGGTGAGTTGGAAGTGGTTAGTGGGTGGCGGTGGCGTGGCGGGGGGTCATGGCCTG	18.2196	15.5445	Test Set
rb_1667900	ACTTTAGTTGTCGTCGGCCCTCGCTGCTAAAAACAGGTGGCGTGTAGAACCGCCGGGACGTTGCTATCGGATTGCACCCA	14.6398	13.2651	Test Set
rb_2566402	GAAGATCGCGCGACTTTCAAAGTATCATATCTCGGTGGAATGGCAATTTTTTTTAGTGAGAACAACCATCGCGTCAGGCT	15.5097	12.6963	Test Set
rb_3766463	GGCGGAGGTCGGAGCAATAGTACGGCCTTTGGATTTTATTAGCAGGGTCACCTAGTCTTTCCACCGCACGTTGTTGGTCG	15.9101	14.2445	Test Set
rb_763913	GGATCGTGGAGTATGGCTCAGCAGGCCGTGGTAGTGTCGGAGTTAGGATCGATTTGGGGGGCAAAGGAGTGCGCGAAATC	13.6877	14.3276	Test Set
rb_2520341	ACACCAATTAACTTGCCTGCCCCCTTCCGTGTGAGCGCACTGCGGGTAGTTGATGACTGAGCCGCAGCCATATGGGGCTG	13.718	13.5437	Test Set
rb_2994017	GTTCAAGGAGGCAGTTAGAGGGGGCACGGGATAATCCCGCGGCGCGTGCCCAACGCTATTTTTTTAGCCAAACAGGGGAA	15.6929	15.7286	Test Set
rb_1860275	TCTCAGACTCAGTTTGGCGATCCTTGTTTCGTACGGCTTGACGATGACCTATAGGGAACGGAAGCTCTCGTCGTTCTTCG	14.6154	13.9212	Test Set
rb_4702433	AATGTTGTCGCTGAAAAACGGCCGGGTCGACCGGCGAACGTGCTTGGGGGAAGGCATGTGTAGGGATCCGCCGACTGGGT	14.1236	13.0351	Test Set
rb_4302009	GGTGGGTCTTCATTTTCTACTGCGAGGGTAGCTGGGCGCTGAAGCCTTCTGGCTAGATTAAATAGTCGGGGCGCTCGGAC	14.819	12.776	Test Set
rb_2652644	GGGAGCCGTGGTGTGTTAGGGGATGGCGCGGTGGGTGAGCTAGGCCGGGGGGTAGATCACGGGCGATAGAGCACGCCGGA	15.9699	16.23	Test Set
rb_7033344	GCTCATTTGGATGGAGAGGGTAATCGCGATTCCGCAAAACATCTGCTGATGTGTGTTCATTGATGTGAAGGTGTGATAGA	14.5832	11.8114	Test Set
rb_1663708	GGAGCGGTGGCGGGTGATCTGCGGGTGCACCCCGGGGGTGTAGCGGTGCGGGGGTGTCCGATCCGTGCCACCGGTGTGGA	17.0104	16.432	Test Set
rb_306072	GAGTAAGTTGGGGTGTAGCGCGCCGGGGTTGTGGGCCGTGAAAGGGTTGGTTTTGCTACCTTCCAATGCGTGCGGGATGC	14.4216	12.9573	Test Set
rb_5075611	CGGGTCTAGAGATGTGAGGGGCTGCCAGTACCGCGCAGTGCACCGCTAGGCAGCCGCTGGGGGGCGTCCGTTGTGCCTAA	14.3609	13.7957	Test Set
rb_928060	TCTGCATTCGAGTCAACAGTTTTGTAGGCGGGTTACCACTCGCAGTATGTTTCGTTGGATTTTACTGACTCTGTTTTTTG	15.5875	13.1366	Test Set
rb_5549822	CGTCGTTGTTCCCGCAACGCTATGGCGCCATCATCCCGTCCTAGGACGGCGGTCATCGGGGACATAAATTCCGTCTTTAC	15.513	14.024	Test Set
rb_7326600	ACATACGTCCGGAGGTGCCCACAGACCGCTTTTCCTGTACTTATTCGGAATCCTGAGAGTGGGCTGACCGCGCCGACCAT	14.6537	12.8102	Test Set
rb_911173	TTATCGAGCATGCGCAAACTTTCTGGTCCGTGGCCTCCCCTAATATCGAATCAGATGTCCGCGGAGGTGCCGCCTGGCCG	16.2518	14.9597	Test Set
rb_4625605	TTGAGAATGTATGGGCCGCGGGCCGACGAATGGGGTTGTTGGTGTGGTATTGGGCTGGGACGTATTATACTGACGGAGCG	14.8852	12.8491	Test Set
rb_348479	GACTAGTCTTGCACGGGAATGCAGCTCCAGAACACACGGCCCGGTTTCATTTTCGGCTCTCGCGGCGCCCCCCGGCCCCC	15.7922	14.0337	Test Set
rb_685926	AGATGTGTATTCTTGTGCGGCGTCTGACATGCCTATCTGAGAGGGGTCCACGCTCAGTAAGGCTAGGGGCCCGCCACGCC	14.1733	13.3188	Test Set
rb_3590552	TGTCGGAACGGACAAAAGTCCGATTAGGTACTTGGGTGAGTGTTGTCCGGACAAAGGTTTGATACGTTCTCACTAGTGCT	14.7734	13.2122	Test Set
rb_7300330	GTACCGATTTAAGTAGGGATTTTTCATAAACCGGTCATTTGTTTACGGTCAGTTTCTCCCTCTCCAGAAGGACGTCACCG	15.2188	13.6557	Test Set
rb_1870271	TCGCAGAGAGCAGGGGAGAAGGTGGCCGGTGCAGTCAGGGCCTAGGGTCGACGGCCGGATTTCTCGCGTGTCACGAAAGG	15.5129	14.3401	Test Set
rb_2704466	TCGGGCACTATGTTGTACGTAACAACTTTCTCGAGTCGGACGCTCGCATACTCGACACGAATTTAACGGTCTGTGCGAAG	14.6213	13.1949	Test Set
rb_6816656	CAGTGCGACTTGACTAGGGCGACGGTCGCTGAAAGAGCTAGAGTGAGAGCGCCGGAGGTCGGTGCCGCGAAGTAGGCGAA	14.9425	13.1856	Test Set
rb_6104160	GGTAAGTCCCTCCAGGCAGACGGAACGTCTAGGTAATGTGGTCACCGGGGGTGGACCGGGCGGGCCCACGCTCGCTTCGA	15.4862	13.8971	Test Set
rb_4905068	GCTTTGGTTAAGAACCCTGGCAGTTCCGCACGATTTTCGTATTACCCGGGGACTCAACTGGTGACAAGCGGTCTGGTAGA	17.9744	13.6199	Test Set
rb_72490	TTCGAGGACGGGGGTGGTCATTAAGCGACTTATTACCCTGCCAAGTGAGCCATCTGGTTCGGGGAGCACGTTTTCCATTT	18.2493	15.1312	Test Set
rb_2918118	TCACATGCGATTCGGGGTAAGCGTGTAGGCGTCTGAGCAGCACGCTGGTGCTAAAGCGATGGGCGGAGGGAAGTAGCGGA	14.562	12.8078	Test Set
rb_643599	TCTAACGTGGCACGGAAATCACGGTGTCACGGGGCGTAGCGTTGTGTTGTGGCAGCCGGGGGGTACCGTGGTAGGTGGTG	15.5327	15.0005	Test Set
rb_3452318	TCTTGTTCGATGACGCCGCAGTACTCAGTACGCGAAGCGGCGATTAGTGAGCGCATCATTCGGACGGCGGGAATGATGTA	15.8815	14.3241	Test Set
rb_6109363	GCGGATTCGCTAAGAAGGCCGTTCGCAAAGTAAGCACGCGGTGAGACTGGACGCGCAGGTCTACAAAAGATTGCAATGGA	15.9127	13.7229	Test Set
rb_327044	GTATGTATGGGCGGAGAGGGCCTCGTTGTCCTGTCATCCCCAGGGTCATTGAGACGGGTCCACATTTCGTCCCGATCGGG	16.9557	14.5013	Test Set
rb_6422069	CGGGTTGGTGATTCTTAGGAAGAGTCGAGCGGGGGCAGTGCGGGTTGCAGCGGATCGCGCACGTAGTTGCGGGACGTCAC	16.715	15.5761	Test Set
rb_405147	CTAGTCTTTTTTACGGGATTTAAGTAACACGCTTAATACTTAATTCCGGTTCCGTGGATTACAACGGCGCTGATGAGCGA	13.6719	12.1815	Test Set
rb_2210402	GGTCTCGGTTTCCGGGGCTTGGCCGCTCGGCTTGTTGTAGACACTAGGAAAATTAGCGGCGGCGCCGCTGTGGGTGTGCA	17.255	15.5618	Test Set
rb_1908021	ATAGTTCAGCCGGAAGATCCGCTTCGAATATTGGCATACCCGTTCTGTTAGCGCACGTGCGCGGCATTGTCGTATAGCGT	15.0074	11.7587	Test Set
rb_7306165	GTAGAATGGTACAATAGCCGGCATGTACAGTCTAATCGGGGAGTACCTGGAGGATGACCGTTGGCAAGCGTGCGGCATTC	15.107	14.1274	Test Set
rb_7294256	CCGATGCGGAAGGTAGGATTGGATATCTGGAAATATGGTGTGTATTTCCGAGGGGTAACGGGTCTCCGGGCAGGCCGTCA	14.7785	13.7367	Test Set
rb_4128613	TACTTAGTATGCCGGCACTATCTGCCGATGAGTACCCGGCCACGCGCTAGCTGCCTATCACGTATGGTTTCGCGTCCTAT	14.2784	12.5731	Test Set
rb_3107424	TAACTATTATTCGGCGCGGCGTGTCAAAAAATGGAAAAACACATCTCGATTGCCGACCGGCTAGGGCTAGTGTTTCGGGA	17.3785	15.4304	Test Set
rb_3739379	GCGCTTCCTCAAACAAAAGCAATCCTGGAAATGTTTACCTAGTGGTGGGAATTCTCTTGCGTGTAGGGTTACTTTGCGGA	14.3621	12.5191	Test Set
rb_5081302	CGTGTCCGTAGTTGCGTGCGCGCAAATTCATTAGTTCGGCAGGGGGTATATCACTTAGAGGCGCGTGGTTGGGAGAAGTT	15.5312	15.6315	Test Set
rb_571889	GTTTCTAATGCGTTAACGGATTCGTGAGGCGGCGCTGGGGGGTGCTGTTTGGGCGGTGGCGCTGGTGTGTGGGCGAGGCT	16.1221	14.5991	Test Set
rb_3836314	CGGGTAGGTATTCATTTTGCTTTCCTGGTGGATCGATGCTCGGGGTGGTTATTAGACTTAGTTCATGGGCGTTTTGTAGA	15.2683	12.6991	Test Set
rb_5295685	CCGTACTTCATCAGCTTATCTTATGGACTAAGTGCGGTTATATGAGGGTAAGTTTGCGTCCAGATACTACCACCAAACCG	15.1888	12.8658	Test Set
rb_85296	TTTGCGGGAGTGCTATGGCGTCTCCGCACTTGGTCAGAGAGGGACTGCGGACGATGCTCGCCTGCGGTGGCACCTTACGA	14.789	13.8497	Test Set
rb_799792	ATCTTATGTAGGAGCTCGGTCATCGTCGGGCTATCAACGCTCGGTGTTTGTAGAGCAATGTGCCTCGCACCCCTGGGGGG	14.4259	14.0102	Test Set
rb_6842114	TGTTGAGAGGTTTGTGGTCAGTGTGGTGCCGGATCGGGAGGTTGTTCGGGGAGTTACTGAGGCGATAGCGCCAACGAACG	14.1256	13.1457	Test Set
rb_4013023	AACATTCAGTCGTATTGAATTACAAGATGCTACATACGGCGTTTCCTCGTTCATTTAGGCCGCATCGCGGGTGCCCATTT	17.183	15.0593	Test Set
rb_1803313	TCGCGGGTCATGAGTAGGTGACTGTATTTGCACGCCATCCGGAAGGGGTAGAGGACACGTGGTGGAGTTGTGGGTCGAGC	15.3613	15.0493	Test Set
rb_3522434	GTCATTTTATTTAAACGGCGGTTTATTGCTTGTTTGGGAAAAGAATTGTCGACTGGTGTCATGTTCAACGGCGCGTGATG	16.7373	14.9947	Test Set
rb_2555978	TTTGAAGCGAGGACTCAAAGACCGATTGGGTGACGGGGATATTTTTTCGTTCCTTTGCATGGCCCAGCACGCGTGCAACG	16.0952	14.9829	Test Set
rb_3060205	TCTGTCTCTACCATAGCGCGCCGCGTCTATGCTTTTGCGACAAACGTTTTTTCTTGGCCTTTACCAGCGTACTTGCGCGA	17.7425	15.0711	Test Set
rb_2613890	CCTGAGGCAGTAAATACGCGGCTTCTGAGAACCGGTCACCCGCAGCGCAGTGGTGGAAACGCGTGCAATGGACGTTCACA	18.562	15.911	Test Set
rb_4059016	GTGTACGCGCTCTGGTTGAGGCAAACAGGAGTAAGGAAGGAAATTTTACTGAACTTCGAACACGCTGGGGCTGGGTGTTT	15.2517	13.3683	Test Set
rb_6739856	TGGAGGGGGTCGACTGCGTGCAATATTGAACCTGTGCGCGCGGGCCCAGAGCGATGCTTCCGGGCGTACTGTCGCGGCCC	15.7198	13.5815	Test Set
rb_6340591	CCATTGCGGGTTCGGTTGCACTGTAGCTGTCGCTAACTCACACGCGCATTAGCCTTTTTTTATTCGTTTATCGCGATCGG	15.5639	13.9998	Test Set
rb_4030585	GTGCGGGTTTCGGCATGGGCGGATCCTCTGTATGGGTTTACGGACCGTACATTTATCCAAGGACGATTTCTAACGCTCGA	17.9987	15.1316	Test Set
rb_2767432	GGGGTCTCCGAGGCTTGGCAGAATCGGTGATGGGCCCGGTTAGGGGACATAACGGGCGACGCGACTTGTCTACGAGGGCG	16.2123	15.1883	Test Set
rb_5005147	TGCTTGTAGACATCGGTTACAGGGTGCATGTGCGTTAAGGTTACGGGAGTGCTAATTTTTGCGCGGGCGGTGACCACGCT	14.8651	12.7542	Test Set
rb_421902	TGAAGCGGGTCTGGGGTGTACAAAGGGGCGGTAGGGGGACCTGTGCGCGGGTTGCCCGAATGAAACGGGTTGCCCGTCGA	18.2639	16.0317	Test Set
rb_4828221	TCAAATCTCGAGTCTGCGGTCCCGCGTCGATATCAATAGTGTGATGTGGGAAACCGTCCGGAGGCACTTGCGGTACGGAG	15.7272	14.0205	Test Set
rb_1620076	CGGTAAGGAAACGGAATGGTGGTATTAGGCAAACCTAGCATCGCCCGTACCAGGCCCTGTAACCCGCAACGGCAATCGCA	15.1946	13.2651	Test Set
rb_6573228	CTGCTGGGCGCGTTACCCTGATATGTGAAGGGGTGTCGGGGCGCGCCTGGGTACTCTCTATAAGGTTTGCGGCACACATC	17.9066	15.9182	Test Set
rb_5474323	AATTGTGATGGTGGTGTCATGGTTTTTGGGGTTAATGAAGGCGTGTCCGTCCGTTCAGTGGTCGTGGGTCCCGCTCGAGT	15.9769	15.3456	Test Set
rb_195200	TGTACAGCCGATGAGGGTCACGATATTTTCGTTCGGAGGTATATTCCTTGGCAAGTGGGCATCTCCTCTCCCGGGCGCGG	16.7565	14.5844	Test Set
rb_4516760	GCGCCATTGCGGTCTCGCTGGAGCCCACGTGCAGTGGCCTCGGCTGTGACTGCTTGGGCACGACATACGTCGAAGGTAGA	16.9982	13.9853	Test Set
rb_1886432	TTTCCGCGCCAAAAGTCGGGGCATGATACGGTTAAGAAATTGGAGGCGGCATTCTTAAGTAGGCTCGGCAGCAGATGTCG	15.2324	13.928	Test Set
rb_1443636	CTGGTGGTGTTGGTTCGGGGGCGAGGCCGGTCGGGCGGGCGAAGGGCGCATGGTGCTTCTCTATGGATGAGGCGCTCTAA	16.841	13.6739	Test Set
rb_1137192	GTACCTTAGCTCGGACGGTCCGTCCTTGTGCGTCAAATATACTGAGCGAGAATCCCTTCGATTTGATTCAGGTGGGTTGA	14.4974	12.6513	Test Set
rb_529996	CCTCTAAGCTCACTTTGGTTACGGCTAACTACTTGGCGCCGGGACGTCGCGCCGTCAGTTTGCGGCGAGTCTTTCGCAAC	15.4426	13.1614	Test Set
rb_5288677	TATAAATAAATTACAAAAGTTTTCTGTTGGGGGTGCGGGTTTGTCAGTTCGTTCCGGGTAGTTTGGGTGCACTCTCACAT	16.7346	15.1639	Test Set
rb_1790144	AACGTGTTTCGGGCGTAGGGCTTGCTGTTACTGCGGACAGGGAATGCGCGCGCAGATATTCGACTCGGGGCCCTTCGTCA	16.876	14.6679	Test Set
rb_3598649	TGCGTATCCGTTTCGCGGGGTTATAGGGCCCCGTGGTATGGACCCCGATGTAACCGCCCGGGCAATTGGGCTGTCTCGGG	16.0977	15.682	Test Set
rb_4549506	TCCGGCTAAAGCGACTTGTGCGGTGACCGCGCTGGTTTCGTTGGGGATCGGTGTATGGATCAAGGTGAATGACTGTGGGA	14.3759	12.9527	Test Set
rb_3044348	GTGCCATAAAGATCGGGGTCACCGCGGGCGCGATCTCATCGGGGTGGAGGGTTGTGAGTCGGCTTTTCATTCGTGGTAGA	16.9838	14.3506	Test Set
rb_6150465	TCTCGGTCTGGTTAGTGTGCCGTCAGGTGTTCATTTTCACTTTGGGGCTCGAGGGATATTGGGAACAGGGCGCGCACTTA	14.7254	13.5729	Test Set
rb_1427833	CTTGCTCCTGTATGGCCAACAGTCGAATCGATCTGATTGTGTGTGTATCGCTTTACGTGAGCGAGCGTTTTTACGGGGCG	13.6042	11.6351	Test Set
rb_4804507	CGATTGTTGAATCGTCAGCTCACGGAGGGTGACCACCATCTTATCGCCCAGGTGCCTGGGGTTGAGCATGGCCTCGACGG	13.8057	13.6514	Test Set
rb_7130475	TCGTTTGTTGTATTCTGCCGAAATCTCCGAAGATGAAGTACCCGGGCGTAGAGTGAGGGTAAGAGTCACAAATTTGGTGA	16.441	14.5897	Test Set
rb_7425361	TGCGGCCCGTTTTCGGTGGTAGAAGTATTGGGGTACTACGGGCGTGGGATAGATATGGATGTGGGTAGGCGCCGTCACGG	13.2591	12.8427	Test Set
rb_3923101	CGGGGGTTCACGGGTAGCTCTTGTTGCTCACTTTTGGCAAGGTTTACCGGGTAAGGGGCTCTCCTTCTACGCTCTTCCGC	15.4183	13.8623	Test Set
rb_3600568	GAACTCCGATAAAAGTTGTGGCACCGCAACATGACCGGGCTTTTTGTCCGCCGGGCCACTGCGGTCTCCGCGTTGCCTCG	16.4047	14.4445	Test Set
rb_1987726	AAGGGTAATCTGGACGGGATGTACGGGTTGAGCTGTGGAGGATCGGTGATGTCTCTAGGTTGTAATGGCGTCTTTCATGT	15.3715	12.6372	Test Set
rb_4789840	TCGGCGCCGCACTCATTGTCCGCGCCAGCGGCGCGTTAGGGCAAAGCAGATCTGACTGCGGTAGAGACAACTTACATTGG	15.7686	13.1502	Test Set
rb_1468142	GACGCGGGTCAAGAAGTTGGCCGGTCAGTCTAAGGAGTGGTGGAGGGGAGTCGGGGGATAAGAGGGTCGCTCTGGGGGAT	15.0424	13.4602	Test Set
rb_7484393	ACGCTGTAGAGGAAAAGTCGCTCAAGACGGGATCCAAACCCAAGGAGGAAAAGTGGCTGCATCACAGGCAATAGGCGTGC	15.3924	12.7204	Test Set
rb_7042645	GGTTCGACGCGCTGTTAAAGCAGCGGCCCGCATTGTAGCCCGGTTGCTAGGTCGGCCAATGACAGGGGTGGCGCTCCGGT	16.5199	16.6714	Test Set
rb_5572380	GGACTGAAGCGTGAGGGCAGCTGGCTCGCGTTCTGGACTGTGTCACACTTGGTTGTCGTGTAGTCTGTCTGCGCTTGGGG	15.2094	14.249	Test Set
rb_1895874	TTGCGTTTGTGTATACTTCGCTCGTTCAATGAGCGCAGAAGCGCCGGGCAAGCGCCGCACAGCGTGGGTGCGGTTTCATC	15.8124	13.8027	Test Set
rb_2120119	GACATAGTGTACGTAATGGGTGGTGTAGTCCCATTGTAAACTATGTGCGGGTAAATAGGCGGCGGTTGTTACCCGATAAA	14.9205	12.7705	Test Set
rb_2118396	TCTAGTGAGGATCCTGTTCCGGCATAGGTGCTCTTGGGTGTGAGATATCTGGCTGTGTGGGTTTTGGACTTCTGGGAGAA	14.5804	12.9063	Test Set
rb_2465103	TACCAGATCGGAAGCGGGCGGTCCGCACACTCGCACCCACTCATGAGCTGCCGGATATTGGAAACTCCCAGAGTGGCCGA	16.8087	14.8154	Test Set
rb_3703701	AATATTTATGACTTGCGCGTTTTCGTTCTTTCCTTAGGTAGATCACGGGCACGAGACGGGTTTTACACGTGCGTGGATTC	15.7565	13.8695	Test Set
rb_6298733	AAGTTATGTCAAACGGCTTGTGCCGGGCGGGATGGAAGGAAGGAGGTTTTACTCTCATGGGGCAAATTTGATTGTGCTGT	14.2042	12.5443	Test Set
rb_4207316	TGCTTAGTCCGCCTTATTTCTTGCCCAATGTGGCATTAAGCGTTCGGTCGCTTTGAGCGTTAAGCCCCCTTCTGGTCACA	15.2726	14.0154	Test Set
rb_6267567	TCTCGGGTATTAAGGGACTAATGCGCGCCGATTTGCAGTTGGGGGGTAATTTGTTTGGAAGGTATTCTGACTGCGTACGT	13.9492	12.7306	Test Set
rb_894032	TGTCCGAAACTTGTTTTCGTGTTTGATCGCGTCTCCCAAATCCGAAGTTTATCATGCAATCGGGACTATTCGCATGTTGT	14.7757	13.6842	Test Set
rb_2272501	GTGAGTGAGCAGATTCTGGGACTCACGGTGTCATTTTCTCTGTTGCTCAGGGGGGGCTAGAGACCATCGGCCCGCGGGTA	14.1209	13.1738	Test Set
rb_6725717	TAGACGAGTGTGCTGTTTGGGCCGCTACCTCGGTGCGGACACGTCGTGAGGGAAGTTTGCACGGCGTGGGGTGGGAGAGG	15.2441	14.1219	Test Set
rb_370344	TTGGGTCGATACGCCACGTGGGCGGCGCGGCCGCGCCATGTGTGCACTTCTTGCTCTTGTAGGAGTCCCGGGGCTGGTCT	17.0075	14.0634	Test Set
rb_3696312	AAAGGCGCCCACGCGTCGTATGTACTTAAGGCCGGGGTAGAGCTAGTTGCCCGGCTAACCCGGACGCTTCTTGTATTTGT	18.6792	16.8246	Test Set
rb_7185610	GTGATGCTCAGGTACGGTGTCGTCAGCCCGGTCTTGTCAGGCGAGGTACGTAGCGGGGTCCCATCAAGGTTGCGGGGTGG	13.1991	13.7396	Test Set
rb_3768375	TATACGGTGTCTCGGCTCCGACTCCTCACTAATCGGTTCGGGGTCGTGTCTGGAGGCTTGGCTGCTCCGGCGCCGTCCAG	16.7013	14.9754	Test Set
rb_6240113	GGGCGTTCTTGAAATGATGCGGGAAAACAGTCCCGGATGGTGGCTCTAGGGCTGGGGCCTGTTGAGACCGGCTTGGCCGC	14.8806	13.7728	Test Set
rb_2296310	AAGCGACCACGTGTTCGGGGGGCGGGCGATGGGGCTCGCGGCGGGGGGCGCAAGACCGAGTTTCAATAACATACCTGTCT	17.7688	14.3134	Test Set
rb_5384423	TTCCTATTCCCGCGTACTTGAGTACAGAACAGCCACGGCCCTGCGGCCCCACTCTCCACTCCGGTCATCCCTGGTCTACA	14.8084	14.2294	Test Set
rb_7210962	GGTTTCGTGTGTAGCGATCTGCGATGTGATTCGGTGATTGAATCTTAGTATCATGCTGTCTAAGTACGTCCACGATGCGT	15.9783	12.5639	Test Set
rb_772086	AGAAGCTTTTGATTCTTCGTCCGGGTAAATTTGTATAGACAGCGACCCGGCAGATAGGTGTTCTTGTGGGCGGTTCGAAC	16.2537	13.7464	Test Set
rb_4112366	GTATGGGGCGAGCTAAGCGGAATGGAGGTCAGGAATGGTGTCTTGGGCAGCGTGGTTACGGGGCAGTTTGAGTCCGGTGG	15.0199	13.4341	Test Set
rb_5146389	CTTGTTTTAGCTCGGTGCGGAAAACGTAGCGGGGTTATCGCGGTTGTCCTCTGTCGCCTCCCGCTTACCAGCGGATCTGG	16.2678	14.839	Test Set
rb_1868786	AACACGGAGTTCGTAGGTGGCGACACTTAGTAGAGCTCGGGGAAAACTGTAGCAGGTCTGGCGGGAGCTCCGCGAACAGA	16.7934	16.3688	Test Set
rb_684749	TCGGCCCTGTGTATCGAGTGGGCGCAAGGCCTGGGCGGGTAGGTGCGGACAGCCCGCGCTTGGGAGGTATGCATGTTCGG	16.1075	15.2525	Test Set
rb_4885950	TAGTCACGCTTTTCACTGAGGCCGCCGGTTGGGCCTTCCGTAGAGTATGGGCACCCCGTTCAATCTGGGACTCTCAACCT	15.4749	14.412	Test Set
rb_5787808	CCGGCTATTTATAGTTAGAACACTGAATCTGTTTTAATATCGGACTCATATAAAAACGTTCGGTATCGCCGGTCCGTGTC	15.7088	14.3683	Test Set
rb_2120375	GGCACGGACCCCGCTTGTCCTCTACTTTAGATCCTGTTCTGGGTTAGCATTATGCGGCATGAAATGCGGTTGAGGTCATC	13.6047	13.0862	Test Set
rb_3210308	AGATGTCCAGTAGGTCCGGTGCGGGTTAGCACCTCTAGGGTCGGAGGCGATCGAACCTAGGTAAGCGGGAAATAGCGCTT	15.663	13.5917	Test Set
rb_3624773	TGCATTTGTCTTGCATAATTGGCGCCTCGGCACTGATCACACGGCCGAAAGGGTGGTCCTGACGCTCACGCGTGCCACGT	16.0331	14.2755	Test Set
rb_1113852	CGGAGGTCAAATCTTTATTTCGTACCAGAAGTTCATGAGGGTAATTTTCAAGTCCAGGTGGCAAGGAGCTCACGAGTTGC	16.7393	15.8114	Test Set
rb_6075259	TGGGCAACGCGCGGTCTCGGCGCGCCACAGATATACTCGACGGGTTCTTCTTGTTTGGCTTTTAGTTGTCTGAGTGAAAT	16.1935	13.5612	Test Set
rb_7155511	CGGGTCGGGCGTACTATCGGCTTGGGTACAATCAAGCGTGGAATACTCCCTGTGGTATGGTTGGGTGGATCCTGAGGAAT	15.066	13.6934	Test Set
rb_2438707	CAAGGAAAAAACTCCGATCCTCGTACGGCGGTGGTAGGGCGGCGGCGCGTGAAAGTCAAGGGGGATGTGTGACGGGTGGT	15.5947	15.8214	Test Set
rb_1951259	GGGGGGACTCACTTTAAGGATAACGTTACTAGCCGTGCGGCAATGAGGCTACCCGTAACGGGATATGTATACGTCTCACG	15.4896	13.6467	Test Set
rb_3808495	ACTTTCCCGTATGGGCCGAGCATAGGTTTTCGTCAGACCCGCACATAGTACGAGAGTATCGGACCGGTCGTCGCATGCGT	16.3286	15.6019	Test Set
rb_3321590	CTAGTCAACTTTAATAGAGCGTTTTAGAATTCAGGCGGAGTCGTTACAATGATGCGGGTTACGGATACACTTGGCTCGGT	15.7398	13.2741	Test Set
rb_3265518	GTCCGAGTGTACTGTGTATTCGTTAGTGCTCGTCCTGTTGGAACTATGAGTAATCGATGGAGTACGGATGACGAATTCCG	13.8007	11.3905	Test Set
rb_7165947	TTAGTGCTGCGAGCGGATGTTTGTACTGGTCAGCATACACGCGCAGCGGTGTGTTTTGAAGTGATACGACCGCGGATGCT	14.9722	13.3441	Test Set
rb_1008948	GGGACGGCAATGTGGTTAGTTTCGTTCGGGGCGGTCCTAGTGATACTACCTGTGTCGCCCGTGACGGTGATAGGCAATCC	14.6796	13.8865	Test Set
rb_5926227	CTTGCCTGGTATAGGTCATGTGGCTACATCAAAGCTGCTGTGGTTTGTTGGGGGTGTAAGTTGGGCGGGCCCGGTGGCCG	13.9179	12.5484	Test Set
rb_3426146	CCCCAACTGGAAGAACGTCGCCAGACTCATTTCAGGACACAACGGTGCGCCGCACGGGGATGGCTGAGCGGGGGATTAGC	12.4884	11.7315	Test Set
rb_369618	GTGAAGCACGTGGCTGGGTAAGGTTGGAAAGAGGGTCGAAGGAAAGTGCGAGTGTCCGTGGTTAGTGAGGCCCGGGGGGA	16.7519	15.2393	Test Set
rb_3510070	GGGACTTGTGGATCACAATTTATCCGGGCCGGACGTATAGCTATGTGATCTATATTCTCTCCGAGCACCTATACTGAACA	11.9483	11.1994	Test Set
rb_2824640	ACTACGCCAGGTTGCAATTCCGCGGGCGCGGCCTGTTACTAGGACCCGGCCGGGTGGACCCTTGCGGGACCGACCACCAA	16.1978	14.4123	Test Set
rb_1062826	GTAGCCTCTTTATAGCGGAGGCCGCTTGCATGTTTGTCCGTACTGCGTAATTATTACCCTCTTCTGGATGTTGTGTCTTT	15.7082	14.2345	Test Set
rb_2589132	TGCTTTGTGGTTTTCCGGGTGGGATAACTCGGTAAGAGACTCTGGTTGGCTAGAGGTCGGCCTTCGTAGACAGGTATTGG	13.8219	12.4633	Test Set
rb_1149212	GGATCGGATCCCTGTAAAGACGTGAGTGGTGCTGGGAGCCCGCCCTGGAGTACCCGGGGGTTGACAGGGCGAATCCGTCA	15.4326	14.9982	Test Set
rb_3824696	CCGTTTAGCCCACGTAGGGTTTCCAGTTTGGTGGGAGGAGGTATGGGTGGGCCCGCCGCCCGCGCTACCGGGGTGACTGG	17.1891	15.7001	Test Set
rb_4704035	TGAGCGTGAGCGTTACGGCCATGTGATAGCGGGTAATGTAGTCCAGGGTGTGAGACCACGGCATTCAATACGGAGATCCA	15.6947	15.5006	Test Set
rb_1432674	TCGGCGGAACGCACAGCGCGAGTGGATTCGTCCTGTGTGAGTGTCGGGGTGTATCGGAGCGCGCGCCGGGAGGGTTTAAA	18.2386	17.0312	Test Set
rb_4303597	ACGTGCGATTAATGACCCCAGAATCCCGGTTTCCGTCCGACTGTCGGACGGCGCTGCCCGGCTGGCCCGCGGAATGGTAC	16.508	15.3182	Test Set
rb_3239712	GGATAGATTGCCCTAAATATTGCTGCTGGCCAGGAGGTTCGCGTTGAAGGCACGGTCAGGGCCGAAGCAGGAAGTCGGCG	15.4944	14.2662	Test Set
rb_6709633	GTCCAGATCGGTACCCCCTGCCTTTTACCCATCGGCGCGCTGGAGCGTGGGAACGTGACGCGCGTGCACCTGGACTTTCA	16.9305	16.1484	Test Set
rb_5869756	GTATCGCGTGGTTTAGGAAGCCCGCGTGAAGTGGATTCGTAAGTGCCGAGCTATGACTGAAACAAGTACTCCAGTTACTC	13.1667	12.3043	Test Set
rb_7141136	CAACAAAGAGGGTGGCGCGCGGGATAGACTGACAACGGAGGTGTTCCCCAACGGCGTAGTTCGTTTATATACCTTCTCGA	15.5609	13.7212	Test Set
[truncated: 7,185 more rows]

## Sheet: README
Supplemental Table S4: Synthetic yeast promoter sequences generated by other methods, for comparison with regLM.
