# Supplementary material for: Designing realistic regulatory DNA with autoregressive language models
Source: HighWire-hosted journal article supplement (doi:10.1101/gr.279142.124), 2024-09-01
Supplement: Supplemental_Table_S6.xlsx [file Supplemental_Table_S6.xlsx]

## Sheet: Supplemental_Table_S6
	Sequence	label	Group	edit_distance	paired_hepg2_pred	paired_k562_pred	paired_sknsh_pred	independent_pred_hepg2	independent_pred_k562	independent_pred_sknsh
gen_0	CCCGAATACTGTGCTTTTCCGACGGGCTTAGGAAACGGCACACCAGGATATTATATCCTGCACCTGGCTCGGAGGGTCCTACGTGCACGGAGTCTCGCTCATTGCTAGCACAGAAGTCTGAGATCAAACTGCAAGGCGGCAGCGAGGCTGGGGGAGGGGTGCCCGCCATTGCCCAGGCTTGCTTAGGTAAACAGAGCAGC	030	regLM	96	1.04961	0.157384	1.5807	2.16093	0.157338	0.141064
gen_1	GTTTAGCGTAAGAATCAGGGTCCAGCTGGTGCTCCCTAAACAGCAGCTGCTGTTCACTGTTGAAAGGCGCTCTGGAAGGCCAGGTGCGGTGGCTCATGCTTGTAATTCCAGCACTGTGGGAGGCCGAGGTGGGCGGATCACCTGAGGTAAGGAGTTCGAGACCAGCCTGACCAACGTGGAGAAACCCCATCTCTCCTAAA	030	regLM	63	0.141158	2.35887	2.73193	0.373536	2.35886	0.130782
gen_2	TCTCTGCTCCCCAGAGTCCCTGCACGTGGCTTGACAGTGGCCTTGGTAGGACCCACTGGGGTGTTTCTTCGTCGCCCATGGGCCCTCATGCTGTTATCAGTTGGAAATGAATCAGAGATTAGGAAGCGGGGGGAGTGGTGGGGGTGTTATCGCCCAGTGCACACAGGTTACCACAGAGGTCACACGGTAGGTGAGCTGCA	030	regLM	22	0.991762	4.54347	-1.04786	1.02329	4.54345	-0.582923
gen_3	CCTCAGAATTAATGGAGAGGGCCAGTGGCGGCCTGTGCCCTTTGTCCCACTGGCCGGCCTGGGGGTGGCGGCTCCAGAATACAGGGTCCTATTGTGTGCCCTGATGTCAGGCAGCTGGACTGCTGGGAGTGAGGATAAACAAGCAGCTGGAGCATCTCGCCTGAAGCCCCAGGAGAGGGCCAGAGCCCCTGCAGCAGCAG	030	regLM	96	3.06694	0.115513	1.58872	2.39541	0.115577	1.35411
gen_4	CCTGAGAAAGGCTTCAACTAAAGAGCTATGGACAGGGACACTCTGTCACTTCCTGGGATTTTGACCCCCAGCTGTCCAACAGAGGAGGGTCTGTGCCTTTGCTCATTAGCCTAACTTAGATGATAGGTGACAAACTGAAGTGAGCTATAGGGAGTTGTCCACTTCCAGGCTGCTATCAGTATACCAGCTGGGGTGTGGCA	030	regLM	0	0.0176682	3.26595	-0.357133	-0.11138	3.26606	-0.747709
gen_5	CCTGAGAAAGGCTTCAACTAAAGAGCTATGGACAGGGACACTCTGTCACTTCCTGGGATTTTGACCCCCAGCTGTCCAACAGAGGAGGGTCTGTGCCTTTGCTCATTAGCCTAACTTAGATGATAGGTGACAAACTGAAGTGAGCTATAGGGAGTTGTCCACTTCCAGGCTGCTATCAGTGCAGCAGGGCAACCCCTGCG	030	regLM	14	0.00740716	1.0867	-0.650671	-0.11782	1.08674	-0.794766
gen_6	CCTGAGAAAGGCTTCAACTAAAGAGCTATGGACAGGGACACTCTGTCACTTCCTGGGATTTTGACCCCCAGCTGTCCAACAGAGGAGGGTCTGTGCCTTCGCTCATTAGCCTAACTTAGATGATAGGTGACAAACTGAAGTGAGCTATAGGGAGTTGTCCACTTCCAGGCTGCTATCAGTATACCAGCTGGGGTGTGGCA	030	regLM	0	0.0180149	3.39113	-0.306514	-0.153402	3.39094	-0.706709
gen_7	CCAGTAATGGGATGGCTGGGTCCAATGGTATTTCTAGTTCTAGATCCCTGAGGAATTGCCACACTGACTTCCACAATGGTTGAACTAGTTTACAGTCCCGCCAACAGTGTAAAATTATTCCTATTTCTCCACATCCTCTCCAGCACCTGTTGTTTCCTGACTTTTTAATGATCGCCATTCTAACTGGTGTGAGATGGTAT	030	regLM	5	-0.570943	0.237806	-0.529447	-0.148351	0.237665	-0.523244
gen_8	CCCGAATACTGTGCTTTTCCGACGGGCTTAGGAAACGGCACACCAGGATATTATATCCTGCACCTGGCTCGGAGGGTCCTACGTGCACGGAGTCTCGCTCATTGCTAGCACAGAAGTCTGAGATCAAACTGCAAGGCGGCAGCGAGGCTGGGGGAGGGGTGCCCGCCATTGCCCAGGCTTGCTTAGGTAAACAGAGCAAC	030	regLM	97	0.959604	0.077422	1.50912	2.09234	0.0774007	0.0422315
gen_9	CCAGTAATGGGATGGCTGGGTCCAATGGTATTTCTAGTTCTAGATCCCTGAGGAATCACCACACTGAATTCCACAATGGTTGAACTAGTTTACAGTCCCACCAACAGTGTAAAAGTGTTCCTATTTCTCCACATCCTCTCCAGCACCTGTTGTTTCCTGACTTTTTAATGATCGCCATTCTAACTGGTGTGAGATGGTAT	030	regLM	8	-0.465154	0.00955762	-0.398446	-0.131428	0.00981924	-0.509065
gen_10	GATTTTTCTACTGCTAGGTTTTCCTTTTGGGGTTACGATTATTACAGGTGGCAATCAGTTAACTTAGTGGTTCTGTAGGCACCGCCCTATCTTCCAACTCACTTACATTTAAAAATTCACACAGAGAGGCTAGTGGGAAGCGGGTAGGTGTAAACAATGTGCTACAGTGAGAAACCTGAAGGCTCTAAAATTGCACAGTT	030	regLM	100	0.408691	1.33049	0.0168983	0.178437	1.3304	0.0885638
gen_11	GTTTAGCGTAAGAATCAGGGTCCAGCTGGTGCTCCCTAAACAGCAGCTGCTGTTCACTGTTGAAAGGCGCTCTGGAAGGCCAGGTGCGGTGGCTCATGCTTGTAATCCCAGCACTGTGGGAGGCCGAGGTGGGCGGATCACCTGAGGTAAGGAGTTCGAGACCAGCCTGACCAACGTGGAGAAACCCCATCTCTCCTAAA	030	regLM	62	0.132036	2.49772	3.21056	0.287494	2.49778	0.754115
gen_12	AGAAAAAAACAAACAACCCCATCAACAAGTGGGCGAAGGATATGAACAGACACTTCTCAAAAGAAGATATTTATTCAACCAAAAGACACATGAAAAAATTCTCAACATCACTGATCATTAGAGAAATGCAAATCAAAACCACAATGAGATACCATCTCACACCAGTTAGAATGGCGATCATTGAAAAGTCAGGAAGCAAC	030	regLM	45	-0.464563	0.859131	0.309075	-0.232605	0.859077	-0.311739
gen_13	GAACTGCTGGGTTGGGTACCTGCCAGTGTTCAGGCAGCAGTTACATAAGAGCTGCTTTTTTTCCTGGAATTTAGGCTCACTGCTGATGTGTGACCTTCAGCAGTAATTGCCAGTAAATGCAGTGGGGCTGTTTACTGTTAGACACTGGCAACCACAGAGCAAACTCAACTCAGAACATACAGAACCTATTGCAAAGTCAG	030	regLM	97	3.81415	1.07254	0.148824	3.48127	1.07256	-0.0140613
gen_14	CTGTTTGTGCTGTGTGTTTCCAATAATTGACAACATATGTGATTTTGTTATTCTACACTGAGCTTGCTTCGTCTGCATATTCATTAAAAAAGAATTTTTAAAATCTTTGTCAGATGTTCTACATCTGAATCATCTTCTAGTATTAAACCACAGCCAAGAACTTTTATATCTTTTATCACATTAATATAAAGATTCATGGA	030	regLM	94	-0.303379	-0.786493	3.30412	0.352058	-0.786478	1.50606
gen_15	TCTCTGCTCCCCAGAGTCCCTGCACGTGGCTTGACAGTGGCCTTGGTAGGACCCACTGGGGTGTTTCTTCGTCGCCCATGGGCCCTCATGCTGTTATCAGTTGGAAATGAATCAGAGATTAGGAAGCGGGGGGAGTGGTGGGGGTGTTATCGCCCAGTGCACACAGGGTCCCATTCATTCCGCCATTAGATTGTAAAAGG	030	regLM	23	1.18014	5.25701	0.0211534	0.827402	5.25709	0.273959
gen_16	CCTCAGAATTAATGGAGAGGGCCAGTGGCGGCCTGTGCCCTTTGTCCCACCGGCCGGCCTGGGGGTGGCGGCTCCAGAATACAGGGTCCTATTGTGTGCCCTGATGTCAGGCAGCTGGACTGCTGGGAGTGAGGATAAACAAGCAGCTGGAGCATCTCGCCTGAAGCCCCAGGAGAGGGCCAGAGCCCCTGCAGCAGCAG	030	regLM	97	2.98985	0.0682005	1.3629	2.25068	0.0681629	1.38082
gen_17	CCAGTAATGGGATGGCTGGGTCCAATGGTATTTCTAGTTCTAGATCCCTGAGGAATTGCCACACTGACTTCCACAATGGTTGAACTAGTTTACAGTCCCGCCAACAGTGTAAAATTATTCCTATTTCTCCACATCCTCTCCAGCACCTGTTGTTTCCTGACTTTTTAATGATCACCATTCTAACTGGTGTGAGATGGTAT	030	regLM	4	-0.626098	-0.00465547	-0.528091	-0.221746	-0.00469056	-0.535685
gen_18	CCTCAGAATTAATGGAGAGGGCCAGTGGCGGCCTGTGCCCTTTGTCCCACCGGCCGGCCTGGGGGTGGCGGCTCCAGAATACAGGGTCCTATTGTGTGCGCTGATGTCAGGCAGCTGGACTGCTGGGAGTGAGGATAAACAAGCAGCTGGAGCATCTCGCCTGAAGCCCCAGGAGAGGGCCAGAGCCCCTGCAGCAGCAG	030	regLM	97	3.75902	0.388813	1.93444	2.40192	0.388823	1.72803
gen_19	ATATTGGTACAGCACATTTGTCGCTATTAATAAACCAGTATCCAGGGCCAGGTGCAGTGGCTCACGCCTGTAATCCCAGCACTTTGGGAAGCCGAGGCAGGTGGATCACCTGAGGTCAGGAGTTCGAGACCAGCCTGACCAACATGGGAAAACCCTGTCTCTACTAAAAATACAAAATTAGCTGGGCTTGGTGGTGCATG	030	regLM	49	-0.332084	2.60168	3.42792	-0.178495	2.60177	0.213957
gen_20	TCTCTGCTCCCCAGAGTCCCTGCACGTGGCTTGACAGTGGCCTTGGTAGGACCCACTGGGGTGTTTCTTCGTCGCCCATGGGCCCTCATGCTGTTATCAGTTGGAAATGAATCAGAGATTAGGAAGCGGGGGGAGTGGTGGGGGTGTTATCGCCCAGTGCACACAGGTTACCACAGAGGTCACACGGTAGGTGAGCTACA	030	regLM	22	0.997262	4.61827	-1.06773	1.01256	4.61807	-0.587664
gen_21	TCTCTGCTCCCCGGAGTCCCTGCACGTGGCTTGACAGTGGCCTTGGTAGGACCCACTGGGGTGTTTCTTCGTCGCCCATGGGCCCTCATGCTGTTATCAATTGGAAATGAATCAGAGATTAGGAAGCGGGGGGAGTGGTGGGGGTGTTATCGCCCAGTGCACACGGGGCTCTCAGCTAATCTCTGGCGGCCCTGGGTTCG	030	regLM	0	-0.0570596	5.25885	-0.291786	0.199712	5.25886	0.0233408
gen_22	CCAGTAATGGGATGGCTGGGTCCAATGGTATTTCTAGTTCTAGATCCCTGAGGAATTGCCACACTGACTTCCACAATGGTTGAACTAGTTTACAGTCCCACCAACAGTGTAAAATTATTCCTATTTCTCCACATCCTCTCCAGCACCTGTTGTTTCCTGACTTTTTAATGATCGCCATTCTAACTGGTGTGAGATGGTAT	030	regLM	5	-0.595802	0.163202	-0.487664	-0.200277	0.163169	-0.560874
gen_23	CCTAGAGACTCTGGGCACCACTGATAAGGGTGGGTACCAGGAACTCCACCCTTTACCGAGAAAGGCAGGCTGGTTTATCGCCACTCAGACCCAGCCAGCAACCACCCTGGGGAGTGTGTCAGCCACCAGGAGCATCGCTGTTGGGGAAATGTTATTAACTAGGAAGGAACTTTACAGAATGTTCCACACAAATGTCACAT	030	regLM	0	-0.496587	6.58815	-0.028856	0.102945	6.58809	1.20566
gen_24	CCATCTGTTCCATCCTCACCCACCCAAGGAGCCGCCCCTGCTCCTAGAGACTCTGGGCACCACTGATAAGGGTGGGTACCAGGAACTCCACCCTTTACCGAGAAAGGCAGGCTGGTTTATCGCCACTCAGACCCAGCCAGCAACCACCCTGGGGAGTGTGTCAGCCACCAGGAGCATCGCTGTTGGGGAAATGTTATTTC	030	regLM	84	0.443766	8.19881	0.713529	0.2383	8.19884	1.72856
gen_25	TCTCTGCTCCCCAGAGTCCCTGCACGTGGCTTGACAGTGGCCTTGGTAGGACCCACTGGGGTGTTTCTTCGTCGCCCATGGGCCCTCATGCTGTTATCAGTTGGAAATGAATCAGAGATTAGGAAGCGGGGGGAGTGGTGGGGGTGTTATCGCCCAGTGCACACAGGTTACCACAGACATTTAGCCCTCACTGCAGTTTG	030	regLM	20	0.872148	5.1563	-0.474592	0.516171	5.15632	-0.155127
gen_26	GTTTAGCGTAAGAATCAGGGTCCAGCTGGTGCTCCCTAAACAGCAGCTGCTGTTCACTGTTGAAAGGCGCTCTGGAAGGCCAGGTGCGGTGGCTCATGCTTGTAATCCCAGCACTGTGGGAGGCCGAGGTGGGCAGATCACCTGAGGCAGGGAGTTCGAGACCAGCCTGACCAACGTGGAGAAACCCCATCTCTCCTAAA	030	regLM	64	-0.0787455	2.01968	2.82607	-0.0579199	2.0197	0.15535
gen_27	ACTGGGATTGCTTGGTTGAATGGTAGTTCCATTTTTAGTTCTTTGAGAAATCTCCAAACTGCTTTCCACAGCAGCTTAACTAATTTACATTCCCACCAGCACTGTCTTAAGTGTTTCCTTTTCTCCGCAGCCTTGCCAACATCTGTAATTTTTTGACTTTTTAATGATATTCTTTATGACTGGTGCAAGATGGTATCTCA	030	regLM	52	0.0351374	0.762744	0.597299	0.275535	0.762746	0.231473
gen_28	GGCTTAGACTGGATGATAGCAATGGAGGTTGGGTGAGGGGCTCAGTTTCTGAAGGCAGAGCCAACAGCATTTTCTGACAGCTTGGATGCTGGGTGAGAGGGGGTGGGGGGTGCTAAGGTTTTGCCTGATCATCTGGAAGGAGGCAGTTGGGATTAGTCACACTGGGGGAAGACTGGAGGAGCTCACATGGTGGACACATT	030	regLM	94	0.890096	3.25088	1.57818	0.440019	3.25082	0.925318
gen_29	CTAGCTGTACCAGCCGCTGCCCCGGACCTGCTGCCCTGCCCCACGCACCCCCCCTCCCCTGGCCAGCCTCCCCAGAGGCCAGAAGGCGCCTTATCGGGCAGGGTTAAGGAGGGGGACAGTTATCAGGGGCTGCAGCCTAGATTGGGCCACAATGTCCTCGTCTCTTGAGGGTGGCAGGCTGTGCAGGCTCCCTGACAAGG	030	regLM	10	0.279995	4.13996	0.381815	0.188282	4.14003	0.484708
gen_30	CCCGAATACTGTGCTTTTCCGACGGGCTTAGGAAACGGCACACCAGGATATTATATCCTGCACCTGGCTCGGAGGGTCCTACGTGCACGGAGTCTCGCTGATTGCTAGCACAGAAGTCTGAGATCAAACTGCAAGGCGGCAGCGAGGCTGGGGGAGGGGTGCCCGCCATTGCCCAGGCTTGCTTAGGTAAACAGAGCAGC	030	regLM	97	1.06333	0.140736	1.35889	2.17751	0.140791	0.226488
gen_31	TCTCTGCTCCCCAGAGTCCCTGCACGTGGCTTGACAGTGGCCTTGGTAGGACCCACTGGGGTGTTTCTTCGTCGCCCATGGGCCCTCATGCTGTTATCAATTGGAAATGAATCAGAGATTAGGAAGCGGGGGGAGTGGTGGGGGTGTTATCGCCCAGTGCACACAGGTTACCACAGACGGCACACAGGCCCAGGCATGTC	030	regLM	20	2.70993	3.39011	2.69235	2.93719	3.39009	3.06341
gen_32	GATTTTTCTACTGCTAGGTTTTCCTTTTGGGGTTACGATTATTACAGGTGGCAATCAGTTAACTTAGTGGTTCTGTAGGCACCGCCCTATCTTCCAACTCACTTACATTTAAAAATTCACACAGAGAGGCTAGTGGGAAGCGGGTAGGTGTAAACAATGTGCTACAGTGAGTCACACCCGTCACAAAAGCCAACAATGAT	030	regLM	100	2.74233	3.21187	0.126794	2.21788	3.2118	0.824256
gen_33	CCATCTGTTCCATCCTCACCCACCCAAGGAGCCGCCCCTGCTCCTAGAGACTCTGGGCACCACTGATAAGGGTGGGTACCAGGAACTCCACCCTTTACCGAGAAAGGCAGGCTGGTTTATCGCCACTCAGACCCAGCCAGCAACCACCCTGGGGAGTGTGTCAGCCACCAGGAGCATCGCTGTTGGGGAAATGTTATTAA	030	regLM	84	0.341441	8.21426	0.708819	0.237389	8.2142	1.70875
gen_34	CTGGCTGTTTCCTGACTTTTTAATGATCGCCATTCTAACTGGTGGGAGATGGTATCTCATTGTGGTTTTGATTTGCATTTCTCTGATGGCCAGTGATGATGAGCATTTTTTCATGTGTCTCTTGGCTGCATAAATGTCTTCTTTTGAGAAGAGACCCTTCACCCACTTTTTGATGGGGTTGTTTGTTTTTTTCTTGTAAA	030	regLM	37	-0.235706	0.732148	-0.0099124	0.0416262	0.732064	-0.12411
gen_35	GTTTAGCGTAAGAATCAGGGTCCAGCTGGTGCTCCCTAAACAGCAGCTGCTGTTCACTGTTGAAAGGCGCTCTGGAAGGCCAGGTGCGGTGGCTCATGCTTGTAATCCCAGCACTGTGGGAGGCCGAGGTGGGCGGATCACCTGAGGTAAGGAGTTCGAGACTAGCCTGACCAACGTGGAGAAACCCCATCTCTCCTAAA	030	regLM	63	0.201261	2.3577	2.8941	0.361281	2.35776	0.28679
gen_36	TCTCTGCTCCCCAGAGTCCCTGCACGTGGCTTGACAGTGGCCTTGGTAGGACCCACTGGGGTGTTTCTTCGTCGCCCATGGGCCCTCATGCTGTTATCAGTTGGAAATGAATCAGAGATTAGGAAGCGGGGGGAGTGGTGGGGGTGTTATCGCCCAGTGCACACAGGTTACCACAGACATTTATCACTGGCCAAAGGGAA	030	regLM	21	0.682061	5.54629	-0.5276	0.447396	5.54628	-0.277741
gen_37	TCTCTGCTCCCCAGAGTCCCTGCACGTGGCTTGACAGTGGCCTTGGTAGGACCCACTGGGGTGTTTCTTCGTCGCCCATGGGCCCTCATGCTGTTATCAGTTGGAAATGAATCAGAGATTAGGAAGCGGGGGGAGTGGTGGGGGTGTTATCGCCCAGTGCACACGGGGCTCTCAGCTAATCTCTGGCGGCCCTGGGTCCA	030	regLM	3	0.707515	5.80519	-0.246491	0.920312	5.80518	0.0882563
gen_38	TCTCTGCTCCCCGGAGTCCCTGCACGTGGCTTGACAGTGGCCTTGGTAGGACCCACTGGGGTGTTTCTTCGTCGCCCATGGGCCCTCATGCTGTTATCAGTTGGAAATGAATCAGAGATTAGGAAGCGGGGGGAGTGGTGGGGGTGTTATCGCCCAGTGCACACGGGGCTCTCAGCTAATCTCTGGCGGCCCTGGGTCCG	030	regLM	2	0.659509	5.70414	-0.274708	0.841343	5.70411	0.0560006
gen_39	GTTTAGCGTAAGAATCAGGGTCCAGCTGGTGCTCCCTAAACAGCAGCTGCTGTTCACTGTTGAAAGGCGCTCTGGAAGGCCAGGCGCGGTGGCTCATGCTTGTAATCCCAGCACTGTGGGAGGCCGAGGTGGGCGGATCACCTGAGGTAAGGAGTTCGAGACCAGCCTGACCAACGTGGAGAAACCCCATCTCTCCTAAA	030	regLM	63	0.328788	2.94809	4.08172	0.605981	2.94813	1.8397
gen_40	CCATCTGTTCCATCCTCACCCACCCAAGGAGCCGCCCCTGCTCCTAGAGACTCTGGGCACCACTGATAAGGGTGGGTACCAGGAACTCCACCCTTTACCGAGAAAGGCAGGCTGGTTTATCGCCACTCAGACCCAGCCAGCAACCACCCTGGGGAGTGTGTCAGCCACCAGGAGCATCGCTGTTGGGGAATGGGTTGGAG	030	regLM	84	0.329863	8.08389	0.826105	0.18772	8.08387	1.65395
gen_41	GTTTAGCGTAAGAATCAGGGTCCAGCTGGTGCTCCCTAAACAGCAGCTGCTGTTCACTGTTGAAAGGCGCTCTGGAAGGCCAGGTGCGGTGGCTCATGCTTGTAATCCCAGCACTGTGGGAGGCCGAGGTGGGCGGATCACCTGAGGTAGGGAGTTCGAGACCAGCCTGACCAACGTGGAGAAACCCCATCTCTCCTAAA	030	regLM	63	0.110704	2.52215	3.22662	0.277471	2.52211	0.604383
gen_42	CATTCCATTCCATTCCATTCTGCATTCTGTTCCATTCTCCATTCCATTCCATTCTCCATACCATCCTCCATTCCATTACACTGCATTCCATTCTCCATTATATTTTATTCACCACGGCATTCCATTACATTTTCCATTCCATTCTCCATTACATTCCATTCTCCATTACATTCCATATTCTATTCCTTTCTCCATTCCAT	030	regLM	90	-0.867051	-0.389282	4.38168	-0.332359	-0.389307	-0.595006
gen_43	GATTTTTCTACTGCTAGGTTTTCCTTTTGGGGTTACGATTATTACAGGTGGGAATATAAACATTTCCTTTGGGCGTATATATATATATATATATATATATATATATATATATATATATATATATATATATATATATATATATATATATATATATATATATATATATATATATATATATATATATATATATATATATATAT	030	regLM	92	0.0208093	0.278618	0.63146	0.326297	0.27863	0.845992
gen_44	AGAATTGGAAGGAGCTTAGGGGAAAGCTAGCCTCAGGTCAGAATTGCCTGCATGCCACTCGGCTAGTGAGCTGCTGAATCACCTTATTCCTGGAGAAAGCCTTTGATACTGAGAAAACTGACTTGCTCAGCTCTTGCTACAACTGTGACCATCTCTGCAACAGTAAAGTAAAAACAAATACCTCTCTTGTTGGGTAATAA	030	regLM	95	0.383252	1.48995	-0.0323586	0.224781	1.48998	0.557183
gen_45	CTAGCTGTACCAGCCGCTGCCCCGGACCTGCTGCCCTGCCCCACCCCCCCCTCCCCTGGCCAGCCTCCCCAGAGGCCAGAAGGCGCCTTATCGGGCAGGATTAAGGAGGGGGACAGTTATCAGGGGCTGCAGCCTAGGTTGGGCCACAATGTCCTCGTCTCTTGAGGGTGGCAGGCTGTGCAGGCTCCCTGACAAGGGGT	030	regLM	5	-0.070318	5.15073	0.421617	0.2598	5.15071	0.491313
gen_46	CCTGAGAAAGGCTTCAACTAAAGAGCTATGGACAGGGACACTCTGTCACTTCCTGGGATTTTGACCCCCAGCTGTCCAACAGAGGAGGGTCTGTGCCTTCGCTCATTAGCCTAACTTAGATGATAGGTGACAAACTGAAGTGAGCTATGGGGAGAGGTACCTCATTTATCTGTTGCTGGGTGTGGCAGGGCCTCTGGGGA	030	regLM	25	0.166822	2.2012	-0.594662	-0.0885364	2.20106	-0.687788
gen_47	CCTGAGAAAGGCTTCAACTAAAGAGCTATGGACAGGGACACTCTGTCACTTCCTGGGATTTTGACCCCCAGCTGTCCAACAGAGGAGGGTCTGTGCCTTTGCTCATTAGTCCATTTTACAGAGAGCTGATTGGTCTGTTTTACAGAGAGCTGATTGGTCTGTTCAAATGCTCTTTATTAAACAGCATTTGCCAATGCATT	030	regLM	47	3.49495	3.35268	3.9735	4.21318	3.3528	4.77849
gen_48	GAAAGGATACTCTGGCTGTCATGTGGACTGGAGGGAGCTGGAATTGAGGCAGTGAGCCCAGCTACCAGAGTCTTGAAATAGTTTAGTGTAAGATGCTGAGTCATGAGTTGGGGCAGAGAGGATAACAAAGTAGGGAAGTGGGGGTAGAGACAGTCGTAAGACCTGAGGAGGGAATGGCTAAGTGAGGGTTGAAGGAGGAA	030	regLM	94	1.32166	5.30109	2.5727	0.964619	5.30117	3.01932
gen_49	GATTTTTCTACTGCTAGGTTTTCCTTTTGGGGTTACGATTATTACAGGTGGCAATCAGTTAACTTAGTGGTTCTGTAGGCACCGCCCTATCTTCCAACTCACTTACATTTAAAAATTCACACAGAGAGGCTAGTGGGAAGCGGGTAGGTGTAAACAATGTGCTACAGTGAGAATCCAGGGGCCTCTCTGGGGGGTGGAGA	030	regLM	101	1.08369	2.68392	0.270318	0.700182	2.68364	0.621825
gen_50	TCTCTGCTCCCCAGAGTCCCTGCACGTGGCTTGACAGTGGCCTTGGTAGGACCCACTGGGGTGTTTCTTCGTCGCCCATGGGCCCTCATGCTGTTATCAGTTGGAAATGAATCAGAGATTAGGAAGCGGGGGGAGTGGTGGGGGTGTTATCGCCCAGTGCACACGGGGCTCTCAGCTAATCTCTGGCGGCCCTGCGGGAT	030	regLM	6	0.69875	5.80703	-0.193445	0.835923	5.80701	0.100293
gen_51	TCTCACCACTCCTATTCAACATAGTGTTGGAAGTTCTGGACAGGGCAATCAGGCAAGAGAAAGAAAGAAATAAAGGGTATTCAAATAGGAAAAGAGGAAATCAAATTGTCCCTGTTTGCAGATGACATGATTGTATATCTGGAAAGTCCCATCGTCTCAGCCCAAAATCTCCTTAAGCTGATAAGCAACTTCAGCAAAGT	030	regLM	1	-0.416166	3.71719	-0.377213	0.0335485	3.71684	-0.184672
gen_52	GTTTAGCGTAAGAATCAGGGTCCAGCTGGTGCTCCCTAAACAGCAGCTGCTGTTCACTGTTGAAAGGCGCTCTGGAAGGCCAGGTGCGGTGGCTCATGCTTGTAATCCCAGCATTTTGGGAGGCCGAGGTGGGCGGATCACCTGAGGTAAGGAGTTCGAGACCAGCCTGACCAACGTGGAGAAACCCCATCTCTCCTAAA	030	regLM	62	-0.0546563	2.85575	3.34162	0.0763153	2.85586	0.972166
gen_53	CCTGAGAAAGGCTTCAACTAAAGAGCTATGGACAGGGACACTCTGTCACTTCCTGGGATTTTGACCCCCAGCTGTCCAACAGAGGAGGGTCTGTGCCTTTGCTCATTAGCCTAACTTAGATGATAGGTGACAAACTGAAATGAGCTATAGGGAGTTGTCCACTTCCAGGCTGCTATCAGTATACCAGCTTCCTTGCCGCC	030	regLM	8	-0.122418	1.20023	-0.365546	-0.134882	1.20022	-0.659917
gen_54	CCTGAGAAAGGCTTCAACTAAAGAGCTATGGACAGGGACACTCTGTCACTTCCTGGGATTTTGACCCCCAGCTGTCCAACAGAGGAGGGTCTGTGCCTTTGCTCATTAGCCTAACTTAGATGATAGGTGACAAACTGAAGTGAGCTATGGGGAGAGGTACCTCATTTATCTGTTGCTGGGTGTGGCAGGGCCTCTGGGGA	030	regLM	25	0.124654	2.27662	-0.800944	-0.136586	2.27673	-0.775016
gen_55	AGAATTGGAAGGAGCTTAGGGGAAAGCTAGCCTCAGGTCAGAATTGCCTGCATGCCACTCGGCTGGCTAGTGAGCTGCTGAATCACCTTATTCCTGGAGAAAGACTTTGATACTGAGAAAACTGACTTGCTCAGCTCTTGCTACAACTGTGACCATCTCTGCAACAGTAAAGTAAAAACAAATACCTCTCTTGTTGGGTA	030	regLM	93	0.30202	0.852173	0.212162	0.116089	0.85219	0.489646
gen_56	TCTCTGCTCCCCGGAGTCCCTGCACGTGGCTTGACAGTGGCCTTGGTAGGACCCACTGGGGTGTTTCTTCGTCGCCCATGGGCCCTCATGCTGTTATCAGTTGGAAATGAATCAGAGATTAGGAAGCGGGGGGAGTGGTGGGGGTGTTATCGCCCAGTGCACACAGGTTACCACAGACATTTAGCCCTCAGTGTGCTGAT	030	regLM	22	0.807155	5.11958	-0.635736	0.458055	5.11954	-0.238132
gen_57	TCTCTGCTCCCCAGAGTCCCTGCACGTGGCTTGACAGTGGCCTTGGTAGGACCCACTGGGGTGTTTCTTCGTCGCCCATGGGCCCTCATGCTGTTATCAGTTGGAAATGAATCAGAGATTAGGAAGCGGGGGGAGTGGTGGGGGTGTTATCGCCCAGTGCACACAGGTTACCACAGACATTTAGCCCTCACTGCAGTTTC	030	regLM	21	0.857398	5.13134	-0.47578	0.530385	5.13129	-0.136759
gen_58	TCTCTGCTCCCCAGAGTCCCTGCACGTGGCTTGACAGTGGCCTTGGTAGGACCCACTGGGGTGTTTCTTCGTCGCCCATGGGCCCTCATGCTGTTATCAGTTGGAAATGAATCAGAGATTAGGAAGCGGGGGGAGTGGTGGGGGTGTTATCGCCCAGTGCACACGGGGCTCTCAGCTAATCTCTGGCGGCCCTGGGTTCG	030	regLM	1	0.690329	5.72534	-0.292048	0.774168	5.72535	0.0759539
gen_59	CCCGAATACTGTGCTTTTCCGACGGGCTTAGGAAACGGCACACCAGGATATTATATCCTGCACCTGGCTCGGAGGGTCCTACGTGCACGGAGTCTCGCTCATTGCTAGCACAGAAGTCTGAGATCAAACTGCAAGGCGGCAGCGAGGCTGGGGGAGGGGTGCCCGCCATTGCCCAGGCTTGCTTAGGTAAACAGAGCGGC	030	regLM	95	1.02251	0.166862	1.55289	2.21102	0.166945	0.152431
gen_60	GAGAAATTCTCAAGGAGGAGGACACAAACAGGACTGGAAGGGGAGCAGGACTGAGCCAAGCGGATGAGAGGAAAGAGGCATTCCAGTCCTCTGGGGAAGCATGGGAGGTAGGAATTCTTGCCACCAGTGGTTTGGACAAACACACAGAGCGGGTCACCGGGTCAGAGCCGAGGGTTAGGACGGGAGAGGAGCAAAGGTCA	030	regLM	98	3.91294	0.911532	0.307774	2.80709	0.911562	0.411573
gen_61	GTTTAGCGTAAGAATCAGGGTCCAGCTGGTGCTCCCTAAACAGCAGCTGCTGTTCACTGTTGAAAGGCGCTCTGGAAGGCCAGGCGCGGTGGCTCATGCTTGTAATCCCAGCACTGTGGGAGACCGAGGTGGGCGGATCACCTGAGGTAAGGAGTTCGAGACCAGCCTGACCAACGTGGAGAAACCCCATCTCTCCTAAA	030	regLM	64	0.176674	2.94778	4.19381	0.403663	2.94771	1.39203
gen_62	CCATCTGTTCCATCCTCACCCACCCAAGGAGCCGCCCCTGCTCCTAGAGACTCTGGGCACCACTGATAAGGGTGGGTACCAGGAACTCCACCCTTTACCAAGAAAGGCAGGCTGGTTTATCGCCACTCAGACCCAGCCAGCAACCACCCTGGGGAGTGTGTCAGCCACCAGGAGCATCGCTGTTGGGGAATGGGTTGGTA	030	regLM	84	0.315679	7.49572	0.548414	0.0467885	7.49561	1.52676
gen_63	ACTGGGATTGCTTGGTTGAATGGTAGTTCCATTTTTAGTTCTTTGAGAAATCTCCAAACTGCTTTCCACAGCAGCTTAACTAATTTACATTCCCACCAGCACTGTCTTAAGTGTTTCCTTTTCTCCGCAGCCTTGCCAACATCTGTAATTTTTTGACTTTTTAATGATATTCTTTATGACTGGTGCAGGATGGTATCCCA	030	regLM	54	0.140911	0.434941	0.559212	0.316206	0.434994	0.618388
gen_64	GTTTAGCGTAAGAATCAGGGTCCAGCTGGTGCTCCCTAAACAGCAGCTGCTGTTCACTGTTGAAAGGCGCTCTGGAAGGCCAGGTGCGGTGGCTCATGCTTGTAATCCCAGCACTTTGGGAGGCCGAGGTGGGCGGATCACCTGAGGTAGGGAGTTCGAGACCAGCCTGACCAACGTGGAGAAACCCCATCTCTCCTAAA	030	regLM	62	-0.0025003	2.91936	3.52188	0.157609	2.91946	1.16475
gen_65	AGAAAAAAACAAACAACCCCATCAACAAGTGGGCGAAGGATATGAACAGACACTTCTCAAAAGAAGATATTTATTCAACCAAAAGACACATGAAAAAATGCTCATCATCACTGGCCATCAGAGAAATGCAAATCAAAACCACAATGAGATACCATCTCACACCAGTTAGAATGGCGATCATTGAAAAGTCAGGAAGCAAC	030	regLM	45	-0.455243	1.02508	0.0731648	-0.154286	1.02538	-0.3735
gen_66	TCCTGAATGGGCAAAAACTGGAAGCATTCCCTTTGAAAACTGGCACAAGACGGGGATGCCCTCTCTCACCGCTCCTATTCAACATAGTGTTGGAAGTTCTGGCCAGGGCAATCAGGCAGGAGAAATAAATAAAGGGTATTCAATTAGGAAAAGAGGAAGTCAAATTGTCCCTGTTTGCAGATGACATGACTGTATATTTA	030	regLM	21	-0.137973	0.394821	-0.491143	0.33749	0.394743	-0.110086
gen_67	CCTGAGAAAGGCTTCAACTAAAGAGCTATGGACAGGGACACTCTGTCACTTCCTGGGATTTTGACCCCCAGCTGTCCAACAGAGGAGGGTCTGTGCCTTCGCTCATTAGCCTAACTTAGATGATAGGTGACAAACTGAAGTGAGCTATGGGGAGAGGTTGCCACAACTTAAATGTCATGAGGCATACGTTGACCCCAGCA	030	regLM	26	-0.198031	0.143781	-0.69062	-0.188166	0.14381	-0.937142
gen_68	GATGGGTGCCTCTCCATGGAGCTCACATGTCATACTGCGCCCTGACTCATCACATGTCATTGTTCCTTTGTATTAATTTTCTGTCATCTACAGTGAGTTCCTTGAGGGCAGGGAAAGGGCTTTTTATCTCTGCATTACCAGAGCCCAACAGATACACACTGGTTCTTATCCATCCACCCATTCATCCAACAAACATTTAT	030	regLM	1	-0.20105	6.12791	0.598048	-0.0314885	6.12785	-0.0176576
gen_69	CTCAGAATTAATGGAGAGGGCCAGTGGCGGCCTGTGCCCTTTGTCCCACTGGCCGGCCTGGGGGTGGCGGCTCCAGAATACAGGGTCCTATTGTGTGCCCTGATGTCAGGCAGCTGGACTGCTGGGAGTGAGGATAAACAAGCAGCTGGAGCATCTCGCCTGAAGCCCCAGGAGAGGGCCAGAGCCCCTGCAGCAGCAGG	030	regLM	96	2.88308	0.0343146	1.40839	2.24328	0.0343445	1.24331
gen_70	CTCAGAATTAATGGAGAGGGCCAGTGGCGGCCTGTGCCCTTTGTCCCACCGGCCGGCCTGGGGGTGGCGGCTCCAGAATACAGGGTCCTATTGTGTGCGCTGATGTCAGGCAGCTGGACTGCTGGGAGTGAGGATAAACAAGCAGCTGGAGCATCTCGCCTGAAGCCCCAGGAGAGGGCCAGAGCCCCTGCAGCAGCAGG	030	regLM	97	3.76194	0.273855	1.71458	2.28711	0.273853	1.48604
gen_71	TCTCTGCTCCCCAGAGTCCCTGCACGTGGCTTGACAGTGGCCTTGGTAGGACCCACTGGGGTGTTTCTTCGTCGCCCATGGGCCCTCATGCTGTTATCAGTTGGAAATGAATCAGAGATTAGGAAGCGGGGGGAGTGGTGGGGGTGTTATCGCCCAGTGCACACGGGGCTCTCAGCTAATCTCTGGCGGCCCTGGGTCAT	030	regLM	4	0.75828	5.78715	-0.191926	0.92058	5.78702	0.0390114
gen_72	CAAATCAATTAAGCTAAAATAAATCAAAGTTGGAACAAAGCCACCAATATAATGTTAAAAAGTATTCAAATGTAAAACCAATTGAGCCAAAAATAGCATAATGATGTAACCATTTGGAATGAGCATTTATGAGGCTTTAAATCATTTTTATATTACTATTTTAAGGATCAGCACTGCCAGCACTGCAAACTTAAACTCAG	030	regLM	92	0.583542	0.31353	2.58161	0.475073	0.313517	3.08293
gen_73	GATTTTTCTACTGCTAGGTTTTCCTTTTGGGGTTACGATTATTACAGGTGGCAATCAGTTAACTTAGTGGTTCTGTAGGCACCGCCCTATCTTCCAACTCACTTACATTTAAAAATTCACACAGAGAGGCTAGTGGGAAGCGGGTAGGTGTAAACAATGTGCTACAGTGAGACTGATCGCTCACGCTTGTAATCCCAGCA	030	regLM	99	0.781194	1.13518	0.356608	0.546033	1.13536	0.422068
gen_74	CCTGAGAAAGGCTTCAACTAAAGAGCTATGGACAGGGACACTCTGTCACTTCCTGGGATTTTGACCCCCAGCTGTCCAACAGAGGAGGGTCTGTGCCTTTGCTCATTAGCCTAACTTAGATGATAGGTGACAAACTGAAGTGAGCTATGGGGAGAGGTACCTCATTTATCTGTTGCTGGGTGTTGAATAATGTCCTCCTT	030	regLM	30	-0.257441	0.251846	-0.591524	-0.307545	0.251855	-0.791905
gen_75	GACTCCCGCATGCTGTACTTCTGGTTCTCTGAGCGAGTCTTTCACTCGCCGGCCAAGGTAGCTTTCCAGGATGGCCGCCTCATGCTCAGCCTGATGGGAGACGAGTTCAAGGTGAGTGGGTGGGGCTGGGCTGCTAGGGGATCCAGATGGCATGTGGTATGTGTGTGTGTGCACACGCATGGGGAGGAGGGAGGAAACTC	030	regLM	97	2.25752	2.12787	0.565801	1.72608	2.12779	1.80225
gen_76	TCTCTGCTCCCCAGAGTCCCTGCACGTGGCTTGACAGTGGCCTTGGTAGGACCCACTGGGGTGTTTCTTCGTCGCCCATGGGCCCTCATGCTGTTATCAATTGGAAATGAATCAGAGATTAGGAAGCGGGGGGAGTGGTGGGGGTGTTATCGCCCAGTGCACACGGGGCTCTCAGCTAATCTCTGGCGGCCCTGGGTCCG	030	regLM	1	-0.059336	5.38865	-0.201292	0.236312	5.38863	0.0638945
gen_77	CCATCTGTTCCATCCTCACCCACCCAAGGAGCCGCCCCTGCTCCTAGAGACTCTGGGCACCACTGATAAGGGTGGGTACCAGGAACTCCACCCTTTACCGAGAAAGGCAGGCTGGTTTATCGCCACTCAGACCCAGCCAGCGACCACCCTGGGGAGTGTGTCAGCCACCAGGAGCATCGCTGTTGGGGAAATGTTATTAA	030	regLM	84	-0.0642448	7.38668	0.342018	0.000965431	7.38664	1.23123
gen_78	CCATCTGTTCCATCCTCACCCACCCAAGGAGCCGCCCCTGCTCCTAGAGACTCTGGGCACCACTGATAAGGGTGGGTACCAGGAACTCCACCCTTTACCGAGAAAGGCAGGCTGGTTTATCGCCACTCAGACCCAGCCAGCGACCACCCTGGGGAGTGTGTCAGCCACCAGGAGCATCGCTGTTGGGGAAATGTTATCTC	030	regLM	84	-0.00974205	7.41654	0.386248	0.0464679	7.41653	1.19158
gen_79	TCTCTGCTCCCCGGAGTCCCTGCACGTGGCTTGACAGTGGCCTTGGTAGGACCCACTGGGGTGTTTCTTCGTCGCCCATGGGCCCTCATGCTGTTATCAATTGGAAATGAATCAGAGATTAGGAAGCGGGGGGAGTGGTGGGGGTGTTATCGCCCAGTGCACACGGGGCTCTCAGCTAATCTCTGGCGGCCCTGGGTGAG	030	regLM	2	0.0109118	5.39805	-0.19094	0.276995	5.3981	0.0955949
gen_80	TCTCTGCTCCCCAGAGTCCCTGCACGTGGCTTGACAGTGGCCTTGGTAGGACCCACTGGGGTGTTTCTTCGTCGCCCATGGGCCCTCATGCTGTTATCAATTGGAAATGAATCAGAGATTAGGAAGCGGGGGGAGTGGTGGGGGTGTTATCGCCCAGTGCACACAGGTTACCACAGAGGTCACACGGTAGGTAAGGGCCA	030	regLM	22	0.326231	3.09399	-1.15099	0.200103	3.0942	-0.634827
gen_81	CCAGTAATGGGATGGCTGGGTCCAATGGTATTTCTAGTTCTAGATCCCTGAGGAATTGCCACACTGACTTCCACAATGGTTGAACTAGTTTACAGTCCCGCCAACAGTGTAAAATTGTTCCTATTTCTCCACATCCTCTCCAGCACCTGTTGTTTCCTGACTTTTTAATGATCACCATTCTAACTGGTGTGAGATGGTAT	030	regLM	5	-0.535807	0.293612	-0.502221	-0.140182	0.293521	-0.568382
gen_82	TGCACCCCCCCATCATTTTCTTCATTTGTATAATGAGGCTAATACCATGTGTACAACACCGCCGAAATGTACTGGCAGCTCCATATTTCCTTCTCTTATCTCATATTCATCTTTCCACATCTCCCATGAGAGTTTCTCAAGCTGATTAAATTCCTATCCAACATATGTCAGATACATACTTTCAATTCCTAAGAATCAGG	030	regLM	96	-0.0262341	0.408953	2.99	0.274062	0.409083	-0.0777967
gen_83	CTACTTGGGAGGCTGAGACAGAAGAATGGCATGAACCTGGGAGACTGAGACAGGAGAATGGCATGAACCTGGGAGACGGAGGTTGCAGTGAGCCGAGATCGCGCCACTGCACTCCAGCCTGGGCGAGAGAGAGAGAGAGAGAGAGAGAGAGAGAGAGAGAGAGAGAGAGAGAGAGAGAGAGAGAGAGAGAGAGAGAGAGC	030	regLM	87	0.441792	2.48145	1.96743	0.347563	2.48145	0.651873
gen_84	GTTTAGCGTAAGAATCAGGGTCCAGCTGGTGCTCCCTAAACAGCAGCTGCTGTTCACTGTTGAAAGGCGCTCTGGAAGGCCAGGTGCGGTGGCTCATGCTTGTAATCCCAGCACTGTGGGAGGCCGAGGTGGGCGGATCACCTGAGGTAAGGAGTTCGAGACCAGTCTGACCAACGTGGAGAAACCCCATCTCTCCTAAA	030	regLM	63	0.143482	2.39656	2.87418	0.323504	2.3965	0.335969
gen_85	CTCAGAATTAATGGAGAGGGCCAGTGGCGGCCTGTGCCCTTTGTCCCACCGGCCGGCCTGGGGGTGGCGGCTCCAGAATACAGGGTCCTATTGTGTGCCCTGATGTCAGGCAGCTGGACTGCTGGGAGTGAGGATAAACAAGCAGCTGGAGCATCTCGCCTGAAGCCCCAGGAGAGGGCCAGAGCCCCTGCAGCAGCAGC	030	regLM	97	2.95043	0.00231969	1.23685	2.10634	0.00231323	1.1708
gen_86	GAGAAATTCTCAAGGAGGAGGACACAAACAGGACTGGAAGGGGAGCAGGACTGAGCCAAGCGGATGAGAGGAAAGAGGCATTCCAGTCCTCTGGGGAAGCATGGGAGGTAGGAATTCTTGCCATCAGTGGTTTGGACAAACACACAGAGCGGGTCACCGGGTCAGAGCCGAGGGTTAGGACGGGAGAGGAGCAAAGGTCA	030	regLM	97	3.29429	0.760048	0.181564	2.33006	0.760156	0.382972
gen_87	ACTGGGATTGCTTGGTTGAATGGTAGTTCCATTTTTAGTTCTTTGAGAAATCTCCAAACTGCTTTCCACAGCAGCTTAACTAATTTACATTCCCACCAGCACTGTCTTAAGTGTTTCCTTTTCTCCGCAGCCTTGCCAACATCTGTAATTTTTTGACTTTTTAATGATATTCTTTATGACTGGTGCAAGATGGTATGTCA	030	regLM	53	0.035608	0.302096	0.657928	0.27618	0.302093	0.323332
gen_88	TCTCTGCTCCCCGGAGTCCCTGCACGTGGCTTGACAGTGGCCTTGGTAGGACCCACTGGGGTGTTTCTTCGTCGCCCATGGGCCCTCATGCTGTTATCAGTTGGAAATGAATCAGAGATTAGGAAGCGGGGGGAGTGGTGGGGGTGTTATCGCCCAGTGCACACAGGTTACCACAGAGGTCACACGGTAGGTGAGGGGTA	030	regLM	23	0.766523	4.71553	-0.993857	0.670848	4.7156	-0.576859
gen_89	TCTCTGCTCCCCAGAGTCCCTGCACGTGGCTTGACAGTGGCCTTGGTAGGACCCACTGGGGTGTTTCTTCGTCGCCCATGGGCCCTCATGCTGTTATCAATTGGAAATGAATCAGAGATTAGGAAGCGGGGGGAGTGGTGGGGGTGTTATCGCCCAGTGCACACGGGGCTCTCAGCTAATCTCTGGCGGGTCAGGGTCAA	030	regLM	6	0.110215	5.58153	-0.294413	0.216591	5.58154	-0.18597
gen_90	CCATCTGTTCCATCCTCACCCACCCAAGGAGCCGCCCCTGCTCCTAGAGACTCTGGGCACCACTGATAAGGGTGGGTACCAGGAACTCCACCCTTTACCGAGAAAGGCAGGCTGGTTTATCGCCACTCAGACCCAGCCAGCGACCACCCTGGGGAGTGTGTCAGCCACCAGGAGCATCGCTGTTGGGGAAATGTTATTTC	030	regLM	84	-0.00857344	7.36771	0.373021	0.0117183	7.36778	1.26042
gen_91	ATATTGGTACAGCACATTTGTCGCTATTAATAAACCAGTATCCAGGGCCAGGTGCAGTGGCTCACGCCTGTAATCCCAGCACTTTGGGAGGCCGAGGCAGGTGGATCACCTGAGGTCAGGAGTTCGAGACCAGCCTGACCAACATGGGAAAACCCTGTCTCTACTAAAAATACAAAATTAGCTGGGCTTGGTGGTGCATG	030	regLM	48	-0.30457	3.11624	3.21772	-0.025584	3.1163	0.729104
gen_92	CCATCTGTTCCATCCTCACCCACCCAAGGAGCCGCCCCTGCTCCTAGAGACTCTGGGCACCACTGATAAGGGTGGGTACCAGGAACTCCACCCTTTACCGAGAAAGGCAGGCTGGTTTATCGCCACTCAGACCCAGCCAGCGACCACCCTGGGGAGTGTGTCAGCCACCAGGAGCATCGCTGTTGGGGAAAGGTGGGGGC	030	regLM	85	-0.00747306	7.36791	0.540612	0.0178677	7.36785	1.22397
gen_93	GATTTTTCTACTGCTAGGTTTTCCTTTTGGGGTTACGATTATTACAGGTGGCAATCAGTTAACTTAGTGGTTCTGTAGGCACCGCCCTATCTTCCAACTCACTTACATTTAAAAATTCACACAGAGAGGCTAGTGGGAAGCGGGTAGGTGTAAACAATGTGCTACAGTGAGAAACCTGGGGCATTTTCCAAGATGGCAGT	030	regLM	101	1.72523	1.27179	2.24662	1.83519	1.27178	1.22973
gen_94	TCTCTGCTCCCCAGAGTCCCTGCACGTGGCTTGACAGTGGCCTTGGTAGGACCCACTGGGGTGTTTCTTCGTCGCCCATGGGCCCTCATGCTGTTATCAGTTGGAAATGAATCAGAGATTAGGAAGCGGGGGGAGTGGTGGGGGTGTTATCGCCCAGTGCACACAGGTTACCACAGACATTTATCACTCACCGGGGACGC	030	regLM	21	0.661988	5.65523	-0.362808	0.520799	5.6552	-0.245796
gen_95	CCATCTGTTCCATCCTCACCCACCCAAGGAGCCGCCCCTGCTCCTAGAGACTCTGGGCACCACTGATAAGGGTGGGTACCAGGAACTCCACCCTTTACCGAGAAAGGCAGGCTGGTTTATCGCCACTCAGACCCAGCCAGCAACCACCCTGGGGAGTGTGTCAGCCACCAGGAGCATCGCTGTTGGGGAGTGGTGATGAC	030	regLM	84	0.383984	8.14702	0.828894	0.195566	8.14706	1.66958
gen_96	TCTCTGCTCCCCAGAGTCCCTGCACGTGGCTTGACAGTGGCCTTGGTAGGACCCACTGGGGTGTTTCTTCGTCGCCCATGGGCCCTCATGCTGTTATCAGTTGGAAATGAATCAGAGATTAGGAAGCGGGGGGAGTGGTGGGGGTGTTATCGCCCAGTGCACACAGGTTATCACAGCTCAGGGCTGCCAAGGTTGCATGT	030	regLM	19	0.543938	4.66052	-1.19523	0.227788	4.66056	-0.537995
gen_97	TCTCTGCTCCCCAGAGTCCCTGCACGTGGCTTGACAGTGGCCTTGGTAGGACCCACTGGGGTGTTTCTTCGTCGCCCATGGGCCCTCATGCTGTTATCAGTTGGAAATGAATCAGAGATTAGGAAGCGGGGGGAGTGGTGGGGGTGTTATCGCCCAGTGCACACAGGTTACCACAGACAGGGTCTGGGATCTAGGGGGCA	030	regLM	20	0.533289	4.64405	-0.957603	0.113952	4.644	-0.473921
gen_98	TCCTGAATGGGCAAAAACTGGAAGCATTCCCTTTGAAAACTGGCACAAGACGGGGATGCCCTCTCTCACCGCTCCTATTCAACATAGTGTTGGAAGTTCTGGCCAGGGCAATCAGGCAGGAGAAGGAAATAAAGGGTATTCAATTAGGAAAAGAGGAAGTCAAATTGTCCCTGTTTGCAGATGACATGACTGTATATTTA	030	regLM	19	-0.0622888	0.156731	-0.391416	0.404951	0.15682	-0.0349551
gen_99	CCTGAGAAAGGCTTCAACTAAAGAGCTATGGACAGGGACACTCTGTCACTTCCTGGGATTTTGACCCCCAGCTGTCCAACAGAGGAGGGTCTGTGCCTTCGCTCATTAGCCTAACTTAGATGATAGGTGACAAACTGAAGTGAGCTATAGGGAGTTGTCCACTTCCAGGCTGCTATCACTACAACCCAGGTGTTTTCATC	030	regLM	12	-0.248365	1.49608	-0.765837	-0.193292	1.4959	-0.95422
gen_100	TCTCTGCTCCCCAGAGTCCCTGCACGTGGCTTGACAGTGGCCTTGGTAGGACCCACTGGGGTGTTTCTTCGTCGCCCATGGGCCCTCATGCTGTTATCAATTGGAAATGAATCAGAGATTAGGAAGCGGGGGGAGTGGTGGGGGTGTTATCGCCCAGTGCACACAGGTTACCACAGACATTTATCACTGGCCAAAGGGAA	030	regLM	20	0.0129045	5.15511	-0.697196	0.00896309	5.15504	-0.363619
gen_101	CCATCTGTTCCATCCTCACCCACCCAAGGAGCCGCCCCTGCTCCTAGAGACTCTGGGCACCACTGATAAGGGTGGGTACCAGGAACTCCACCCTTTACCAAGAAAGGCAGGCTGGTTTATCGCCACTCAGACCCAGCCAGCAACCACCCTGGGGAGTGTGTCAGCCACCAGGAGCATCGCTGTTGGGGAATGGGTTGGAG	030	regLM	84	0.312933	7.50879	0.511269	0.0379651	7.50875	1.52693
gen_102	CCATCTGTTCCATCCTCACCCACCCAAGGAGCCGCCCCTGCTCCTAGAGACTCTGGGCACCACTGATAAGGGTGGGTACCAGGAACTCCACCCTTTACCGAGAAAGGCAGGCTGGTTTATCGCCACTCAGACCCAGCCAGCGACCACCCTGGGGAGTGTGTCAGCCACCAGGAGCATCGCTGTTGGGGAAATCCTCCTCT	030	regLM	84	0.0294583	7.4131	0.585816	0.0307088	7.41313	1.34201
gen_103	CCTCAGAATTAATGGAGAGGGCCAGTGGCGGCCTGTGCCCTTTGTCCCACTGGCCGGCCTGGGGGTGGCGGCTCCAGAATACAGGGTCCTATTGTGTGCGCTGATGTCAGGCAGCTGGACTGCTGGGAGTGAGGATAAACAAGCAGCTGGAGCATCTCGCCTGAAGCCCCAGGAGAGGGCCAGAGCCCCTGCAGCAGCAG	030	regLM	96	3.69336	0.475115	2.11864	2.56627	0.475055	1.67784
gen_104	CCATCTGTTCCATCCTCACCCACCCAAGGAGCCGCCCCTGCTCCTAGAGACTCTGGGCACCACTGATAAGGGTGGGTACCAGGAACTCCACCCTTTACCGAGAAAGGCAGGCTGGTTTATCGCCACTCAGACCCAGCCAGCGACCACCCTGGGGAGTGTGTCAGCCACCAGGAGCATCGCTGTTGGGGAATGGGTTGGAG	030	regLM	84	-0.0747752	7.28144	0.47248	-0.0383955	7.28146	1.22927
gen_105	CAGAATTTTAAGCGGCTCAATTTACTTTCGTGTTATTTTTAATAACAATGACCATAGTAATGCCTTTTCCCCCTTAAAATGTACAGGCTTATTCAAATAAAATGAGAAATGCCAATGGAATATACTCATCTGGGAAATTACATTTTAACGTCATAGCCAAGGAAAAATTGGAGCTGTATTTTGAAGTCAAAAGTACTTAT	030	regLM	93	0.48947	0.246448	2.78435	0.306741	0.246448	0.707416
gen_106	CCTCAGAATTAATGGAGAGGGCCAGTGGCGGCCTGTGCCCTTTGTCCCACCGGCCGGCCTGGGGGTGGCGGCTCCAGAATACAGGGTCCTATTGTGTGCACTGATGTCAGGCAGCTGGACTGCTGGGAGTGAGGATAAACAAGCAGCTGGAGCATCTCGCCTGAAGCCCCAGGAGAGGGCCAGAGCCCCTGCAGCAGCAG	030	regLM	96	3.14344	0.176913	1.58625	2.2546	0.176791	1.44535
gen_107	TCTCTGCTCCCCAGAGTCCCTGCACGTGGCTTGACAGTGGCCTTGGTAGGACCCACTGGGGTGTTTCTTCGTCGCCCATGGGCCCTCATGCTGTTATCAGTTGGAAATGAATCAGAGATTAGGAAGCGGGGGGAGTGGTGGGGGTGTTATCGCCCAGTGCACACAGGTTACCACAGAGGTCACACGGTAGGTGAGGGGCA	030	regLM	22	0.762165	4.68073	-0.942916	0.711466	4.68075	-0.540007
gen_108	CCTGAGAAAGGCTTCAACTAAAGAGCTATGGACAGGGACACTCTGTCACTTCCTGGGATTTTGACCCCCAGCTGTCCAACAGAGGAGGGTCTGTGCCTTCGCTCATTAGCCTAACTTAGATGATAGGTGACAAACTGAAGTGAGCTATGGGGAGAGGTTGCCACAACCTCAGCTTTCCAGAGGTGGGGCCCTGGCCTGTC	030	regLM	27	0.565035	0.69929	-0.24651	-0.0531049	0.699353	-0.269387
gen_109	TCTCTGCTCCCCGGAGTCCCTGCACGTGGCTTGACAGTGGCCTTGGTAGGACCCACTGGGGTGTTTCTTCGTCGCCCATGGGCCCTCATGCTGTTATCAGTTGGAAATGAATCAGAGATTAGGAAGCGGGGGGAGTGGTGGGGGTGTTATCGCCCAGTGCACACGGGGCTCTCAGCTAATCTCTGGCGGCCCTGGGTTCG	030	regLM	1	0.676423	5.64498	-0.307822	0.744867	5.64503	0.0493538
gen_110	CCTGAGAAAGGCTTCAACTAAAGAGCTATGGACAGGGACACTCTGTCACTTCCTGGGATTTTGACCCCCAGCTGTCCAACAGAGGAGGGTCTGTGCCTTCGCTCATTAGCCTAACTTAGATGATAGGTGACAAACTGAAATGAGCTATAGGGAGTTGTCCACTTCCAGGCTGCTATCAGTATACCAGCTGGGGTGTGGCA	030	regLM	1	0.00229514	3.53884	-0.200805	-0.14942	3.53866	-0.642634
gen_111	TCTCTGCTCCCCGGAGTCCCTGCACGTGGCTTGACAGTGGCCTTGGTAGGACCCACTGGGGTGTTTCTTCGTCGCCCATGGGCCCTCATGCTGTTATCAGTTGGAAATGAATCAGAGATTAGGAAGCGGGGGGAGTGGTGGGGGTGTTATCGCCCAGTGCACACAGGTTACCACAGAGGTCACACGGTAGGTAACCTGAT	030	regLM	24	0.923557	4.5572	-0.846213	1.22523	4.55703	-0.549595
gen_112	TCTCTGCTCCCCGGAGTCCCTGCACGTGGCTTGACAGTGGCCTTGGTAGGACCCACTGGGGTGTTTCTTCGTCGCCCATGGGCCCTCATGCTGTTATCAATTGGAAATGAATCAGAGATTAGGAAGCGGGGGGAGTGGTGGGGGTGTTATCGCCCAGTGCACACAGGTTACCACAGACATTTATCACTCACCGGGGACGC	030	regLM	20	0.0748026	5.25396	-0.414217	0.0467567	5.254	-0.354376
gen_113	CCATCTGTTCCATCCTCACCCACCCAAGGAGCCGCCCCTGCTCCTAGAGACTCTGGGCACCACTGATAAGGGTGGGTACCAGGAACTCCACCCTTTACCAAGAAAGGCAGGCTGGTTTATCGCCACTCAGACCCAGCCAGCGACCACCCTGGGGAGTGTGTCAGCCACCAGGAGCATCGCTGTTGGGGAAATGTTATTAA	030	regLM	84	-0.214828	6.68712	0.264457	-0.123892	6.68699	1.115
gen_114	CTCAGAATTAATGGAGAGGGCCAGTGGCGGCCTGTGCCCTTTGTCCCACCGGCCGGCCTGGGGGTGGCGGCTCCAGAATACAGGGTCCTATTGTGTGCCCTGATGTCAGGCAGCTGGACTGCTGGGAGTGAGGATAAACAAGCAGCTGGAGCATCTCGCCTGAAGCCCCAGGAGAGGGCCAGAGCCCCTGCAGCAGCAGG	030	regLM	97	2.95956	-0.00665446	1.2311	2.13613	-0.00666682	1.17377
gen_115	TCTCTGCTCCCCAGAGTCCCTGCACGTGGCTTGACAGTGGCCTTGGTAGGACCCACTGGGGTGTTTCTTCGTCGCCCATGGGCCCTCATGCTGTTATCAGTTGGAAATGAATCAGAGATTAGGAAGCGGGGGGAGTGGTGGGGGTGTTATCGCCCAGTGCACACAGGTTACCACAGAGGTCACACGGTAGGTGAGCCACA	030	regLM	23	0.954061	4.61822	-0.975707	1.08487	4.61811	-0.589574
gen_116	TCTCTGCTCCCCAGAGTCCCTGCACGTGGCTTGACAGTGGCCTTGGTAGGACCCACTGGGGTGTTTCTTCGTCGCCCATGGGCCCTCATGCTGTTATCAGTTGGAAATGAATCAGAGATTAGGAAGCGGGGGGAGTGGTGGGGGTGTTATCGCCCAGTGCACACGGGGCTCCCATGCTGCCGGAGAACAGAGGCCTGGGG	030	regLM	17	0.929822	5.46964	0.0982106	0.722104	5.46961	0.34212
gen_117	GTTTAGCGTAAGAATCAGGGTCCAGCTGGTGCTCCCTAAACAGCAGCTGCTGTTCACTGTTGAAAGGCGCTCTGGAAGGCCAGGCGCGGTGGCTCATGCTTGTAATCCCAGCACTGTGGGAGGCCGAGGTGGGCGGATCACCTGAGGTAGGGAGTTCGAGACCAGCCTGACCAACGTGGAGAAACCCCATCTCTCCTAAA	030	regLM	64	0.290721	2.9644	4.06292	0.545905	2.96424	1.52674
gen_118	TCTCTGCTCCCCAGAGTCCCTGCACGTGGCTTGACAGTGGCCTTGGTAGGACCCACTGGGGTGTTTCTTCGTCGCCCATGGGCCCTCATGCTGTTATCAGTTGGAAATGAATCAGAGATTAGGAAGCGGGGGGAGTGGTGGGGGTGTTATCGCCCAGTGCACACGGGGCTCTCAGCTAATCTCTGGCGGCCCTGGGTGAT	030	regLM	4	0.713845	5.74044	-0.233727	0.82045	5.74041	0.0896644
gen_119	CACACCACCATTACAACATCGATAACTGCCCAGTAACCATTTGGAATACCTCCAACAATGAGGAACAATATTTCTTGGACTCTCAGTTTATGATAAGTGCGCCTCTGTCATCAACCAATACCATTCAAGTAAGGTACAGTGATGGCTCTGGAAAAGGAGGTGGCTTTAAATATCTACATTCAAAGGGGAAAAAAAATACA	030	regLM	95	0.107312	2.51091	0.597333	-0.0776667	2.51056	0.312846
gen_120	ATATTGGTACAGCACATTTGTCGCTATTAATAAACCAGTATCCAGGGCCAGGTGCAGTGGCTCACGCCTGTAATCCCAGCACTTTGGGAGGCCGAGGTGGGTGGATCACCTGAGGTCAGGAGTTCGAGACCAGCCTGACCAACATGGGAAAACCCTGTCTCTACTAAAAATACAAAATTAGCTGGGCTTGGTGGTGCATG	030	regLM	46	-0.19994	3.47513	3.61852	0.181658	3.47682	1.3932
gen_121	ATTATGATACAGTCCAAGTATGTAACTTTCTGGGGACCAGACTTTGCTGAGAGTCATAATGGAGAGTCAAAGAGTCTGATGGCTGAGAGGGATGTGCCTGGGCTTGCCTTCATAAATGTTCATTGTCTCAGCCAAGGTTTTGGCAGGAGCGAGAACAGCCTCTGGTAGGAGCTGGGGTCACAGGAGGCAATGTCAGCTTT	030	regLM	97	2.12149	0.0579239	5.95317	2.53379	0.0579408	4.37439
gen_122	ACTGGGATTGCTTGGTTGAATGGTAGTTCCATTTTTAGTTCTTTGAGAAATCTCCAAACTGCTTTCCACAGCAGCTTAACTAATTTACATTCCCACCAGCACTGTCTTAAGTGTTTCCTTTTCTCCGCAGCCTTGCCAACATCTGTAATTTTTTGACTTTTTAATGATATTCTTTATGACTGGTGCAAGATGGTATCTCC	030	regLM	53	0.0576547	0.781259	0.628132	0.298514	0.781223	0.292676
gen_123	TCTCTGCTCCCCAGAGTCCCTGCACGTGGCTTGACAGTGGCCTTGGTAGGACCCACTGGGGTGTTTCTTCGTCGCCCATGGGCCCTCATGCTGTTATCAGTTGGAAATGAATCAGAGATTAGGAAGCGGGGGGAGTGGTGGGGGTGTTATCGCCCAGTGCACACAGGGTCCCATTCATTCATTCATTCATTCATTCATTC	030	regLM	21	0.296964	3.62178	-1.09678	-0.0590127	3.62138	-0.14573
gen_124	ATTATGATACAGTCCAAGTATGTAACTTTCTGGGGACCAGACTTTGCTGAGAGTCATAATGGAGAGTCAAAGAGTCTGATGGCTGAGAGGGATGTGCCTGGGCTTGCCTTCATAAATGTTCATTGTCTCAGCCAAGGTTTTGGCAGGAGCGAGAGCAGGCTCAGATCAGTGTCACAGGCAGTACCTTACGTGGCTTGAGG	030	regLM	94	2.43087	0.123822	6.34093	2.57294	0.123793	4.06402
gen_125	GTTTAGCGTAAGAATCAGGGTCCAGCTGGTGCTCCCTAAACAGCAGCTGCTGTTCACTGTTGAAAGGCGCTCTGGAAGGCCAGGTGCGGTGGCTCATGCTTGTAATCCCAGCACTGTGGGAGGCCGAGGTGGGCGGATCACCTGAGGTAGGGAGTTCAAGACCAGCCTGACCAACGTGGAGAAACCCCATCTCTCCTAAA	030	regLM	62	0.126535	2.09649	2.68859	0.319298	2.0968	0.233101
gen_126	TCATTTGAAGATGGAGGCAGAGATTGGAGTGATACAACTATAAGTCAGGGAATGCCAAGGACTTGAGGTCATGTGTTACAGAAGCCCTAGGAAATGAGTCAATTTCCTGGCACAGCACTAAGACATGCTGGTATTCTTCATTCCATCCCTTTCCCCTATTCCTAAATGTGCTCCAGGGACAATGGGGAAGCTGGAGCACA	030	regLM	94	0.683538	0.0265633	5.83805	3.45448	0.0265335	6.56101
gen_127	CATGTTGCCTATGGTATTATAAGAATTGAAAGAAGGCCAGGCGCAGTGGCTCACGCCTGTAATCCCAGCACTTTGGGAGGCTGAGGCGGGCAGATCACTTGAGGTCAGCAGTTCGAGACCAGCCTGGCCAACATGGTGAAACCCCATCTCTACTAAAAATACAAAAATTAGCCAGGCATGGTGGTGCACACCTGTAATCC	030	regLM	44	-0.168371	3.86535	3.42612	0.072334	3.86522	1.17694
gen_128	TATGTGGTCTCATATTTTGTTGCAGTGTCACCTCAAAATAATCAGAATTTTCACATTTAAAGATTTTTTTTCTAATCAGGAAGTGGGAATTAGTAGAGCTTCTTTGCTTTGTCTTCACCTTCTCTGACAGAAAACTTCCTCTGTGGTCATGACATTTCAAAATAAAACCCTTCCTGTACCCAAGAGATAAGAAACTTTTA	030	regLM	97	0.530349	4.68886	0.543644	0.96314	4.68876	1.02397
gen_129	ACTGGGATTGCTTGGTTGAATGGTAGTTCCATTTTTAGTTCTTTGAGAAATCTCCAAACTGCTTTCCACAGCAGCTTAACTAATTTACATTCCCACCAGCACTGTCTTAAGTGTTTCCTTTTCTCCGCAGCCTTGCCAGCATCTGTAATTTTTTGACTTTTTAATGATATTCTTTATGACTGGTGCAAGATGGTATCTCA	030	regLM	51	0.0338121	0.711816	0.738138	0.31707	0.711608	0.579176
gen_130	ATATTGGTACAGCACATTTGTCGCTATTAATAAACCAGTATCCAGGGCCAGGTGCAGTGGCTCACGCCTGTAATCCCAGCACTTTGGGAGGCCGAGGCAGGTGGATCACCTGAGGTCAGGAGTTCGAGACCAGCCTGACCAATATGGTGAAACCCCGTCTCTACTAAAAATACAAAATTAGCTGGGCTTGGTGGTGCATG	030	regLM	48	-0.217263	3.50945	3.05284	0.0740586	3.50954	1.10432
gen_131	ACTTGGGAGGCTGAGACAGAAGAATGGCATGAACCTGGGAGACTGAGACAGGAGAATGGCATGAACCTGGGAGACGGAGGTTGCAGTGAGCCGAGATCGCGCCACTGCACTCCAGCCTGGGCGAGAGAGAGAGAGAGAGAGAGAGAGAGAGAGAGAGAGAGAGAGAGAGAGAGAGAGAGAGAGAGAGAGAGAGAGAGAGA	030	regLM	87	0.433441	2.55088	2.32729	0.405878	2.55083	0.824646
gen_132	GTTTAGCGTAAGAATCAGGGTCCAGCTGGTGCTCCCTAAACAGCAGCTGCTGTTCACTGTTGAAAGGCGCTCTGGAAGGCCAGGCGCGGTGGCTCATGCTTGTAATCCCAGCACTGTGGGAGGCCGAGATGGGCGGATCACCTGAGGTAAGGAGTTCGAGACCAGCCTGACCAACGTGGAGAAACCCCATCTCTCCTAAA	030	regLM	64	0.179176	2.81832	4.22022	0.442758	2.81815	2.02828
gen_133	GTTTAGCGTAAGAATCAGGGTCCAGCTGGTGCTCCCTAAACAGCAGCTGCTGTTCACTGTTGAAAGGCGCTCTGGAAGGCCAGGTGCGGTGGCTCATGCTTGTAATCCCAGCACTGTGGGAGGCCGAGGTGGGCGGATCACCTGAGGTAAGGAGTTCGAGACCAGCCTGACCAGCGTGGAGAAACCCCATCTCTCCTAAA	030	regLM	63	0.134755	2.55831	3.12059	0.320425	2.55837	0.576816
gen_134	CTCTGTCACTTCCTGGGATTTTGACCCCCAGCTGTCCAACAGAGGAGGGTCTGTGCCTTCGCTCATTAGCCTAACTTAGATGATAGGTGACAAACTGAAGTGAGCTATAGGGAGTTGTCCACTTCCAGGCTGCTATCAGTATACCAGCTGGGGTGTGGCAAAGTCCAGAGGTTCAAGCCTCGGTTTTTCATCCTGGGTGA	030	regLM	2	0.580715	2.80632	-0.0771708	0.0987811	2.80625	0.112246
gen_135	AAACAAAAAACAAACAACCCCATCAACAAGTGGGCGAAGGATATGAACAGACACTTCTCAAAAGAAGATATTTATTCAACCAAAAGACACATGAAAAAATGCTCATCATCACTGGCCATCAGAGAAATGCAAATCAAAACCACAATGAGATACCATCTCACACCAGTTAGAATGGCGATCATTGAAAAGTCAGGAAGCAA	030	regLM	42	-0.459985	1.22836	0.0117761	-0.191071	1.22857	-0.322191
gen_136	ATTATGATACAGTCCAAGTATGTAACTTTCTGGGGACCAGACTTTGCTGAGAGTCATAATGGAGAGTCAAAGAGTCTGATGGCTGAGAGGGGTGTGCCTGGGCTTGCCTTCATAAATGTTCATTGTCTCAGCCAAGGTTTTGGCAGGAGCGAGAGCAGGCTCAGATCAGTGTCACAGGCAGTACCTTACGTGCCTTGGCC	030	regLM	95	1.48142	0.0637644	3.40427	1.32718	0.0637633	1.6588
gen_137	CCTGAGAAAGGCTTCAACTAAAGAGCTATGGACAGGGACACTCTGTCACTTCCTGGGATTTTGACCCCCAGCTGTCCAACAGAGGAGGGTCTGTGCCTTTGCTCATTAGCCTAACTTAGATGATAGGTGACAAACTGAAATGAGCTATAGGGAGTTGTCCACTTCCAGGCTGCTATCAGTATACCAGCTGGGGTGTGGCA	030	regLM	1	-0.0296037	3.3846	-0.289815	-0.114181	3.38431	-0.696498
gen_138	CTAGCTGTACCAGCCGCTGCCCCGGACCTGCTGCCCTGCCCCACCCCCCCCTCCCCTGGCCAGCCTCCCCAGAGGCCAGAAGGCGCCTTATCGGGCAGGGTTAAGGAGGGGGACAGTTATCAGGGGCTGCAGCCTAGATTGGGCCACAATGTCCTCGTCTCTTGAGGGTGGCAGGCTGTGCAGGCTCCCTGACAAGGGGT	030	regLM	7	0.513582	4.66483	0.730679	0.29716	4.66483	0.748193
gen_139	CCTCAGAATTAATGGAGAGGGCCAGTGGCGGCCTGTGCCCTTTGTCCCACTGGCCGGCCTGGGGGTGGCGGCTCCAGAATACAGGGTCCTATTGTGTGCACTGATGTCAGGCAGCTGGACTGCTGGGAGTGAGGATAAACAAGCAGCTGGAGCATCTCGCCTGAAGCCCCAGGAGAGGGCCAGAGCCCCTGCAGCAGCCA	030	regLM	96	3.09388	0.260766	1.64986	2.42003	0.260745	1.40995
gen_140	CCAGTAATGGGATGGCTGGGTCCAATGGTATTTCTAGTTCTAGATCCCTGAGGAATTGCCACACTGACTTCCACAATGGTTGAACTAGTTTACAGTCCCGCCAACAGTGTAAAATTGTTCCTATTTCTCCACATCCTCTCCAGCACCTGTTGTTTCCTGACTTTTTAATGATCGCCATTCTAACTGGTGTGAGATGGTAT	030	regLM	6	-0.465675	0.496011	-0.496696	-0.0748704	0.495684	-0.54219
gen_141	CCTGAGAAAGGCTTCAACTAAAGAGCTATGGACAGGGACACTCTGTCACTTCCTGGGATTTTGACCCCCAGCTGTCCAACAGAGGAGGGTCTGTGCCTTTGCTCATTAGTCCATTTTACAGAGAGCTGATTGGTCTGTTTTACAGAGAGCTGATTGGTCTGTTCAAATGCTCTTTATTAAACAGCATTTGCCAATGCAAT	030	regLM	47	3.55173	3.41637	4.19429	4.34162	3.4162	4.8728
gen_142	GTGGCCCCAGGCTGGCCAGGAATCTTCCGCCCTGGCCCTGGGACCAGAAACCCCGCAAAGGTGCCCGAGCTCAGCCCCGTCCAATGCACGGGGGCCCCATTCGTGACACCAGGTGGACACGTGACGGCTCAGAAGGTGTTTCCTGTCCCTAGTGCTGTGGCCGGGCCAGATTCCGAAATCTGGTCCCTGGAAAATTCCAG	030	regLM	97	2.03412	0.18653	2.54875	1.63735	0.186527	1.174
gen_143	CTCTGTCACTTCCTGGGATTTTGACCCCCAGCTGTCCAACAGAGGAGGGTCTGTGCCTTTGCTCATTAGCCTAACTTAGATGATAGGTGACAAACTGAAGTGAGCTATAGGGAGTTGTCCACTTCCAGGCTGCTATCAGTATACCAGCTGGGGTGTGGCAAAGTCCAGAGGTTCAAGCCTCGGTTTTTCATCCTGGGTGA	030	regLM	1	0.477213	2.62806	-0.169045	0.114007	2.62796	0.0327585
gen_144	CTGTTTGTGCTGTGTGTTTCCAATAATTGACAACATATGTGATTTTGTTATTCTACACTGAGCTTGCTTCGTCTGCATATTCATTAAAAAAGAATTTTTTAAATCTTTGTCAGATGTTCTACATCTGAATCATCTTCTAGTATTAAACCACAGCCAAGAACTTTTATATCTTTTATCACATTAATATAAAGATTCATGGA	030	regLM	94	-0.240303	-0.730065	2.94581	0.388573	-0.730027	1.51415
gen_145	CTCTGTCACTTCCTGGGATTTTGACCCCCAGCTGTCCAACAGAGGAGGGTCTGTGCCTTTGCTCATTAGCCTAACTTAGATGATAGGTGACAAACTGAAATGAGCTATAGGGAGTTGTCCACTTCCAGGCTGCTATCAGTATACCAGCTGGGGTGTGGCAAAGTCCAGAGGTTCAAGCCTCGGTTTTTCATCCTGGGTGA	030	regLM	0	0.519184	2.64634	-1.13563	0.1564	2.64639	0.0708789
gen_146	CCCGAATACTGTGCTTTTCCGACGGGCTTAGGAAACGGCACACCAGGATATTATATCCCGCACCTGGCTCGGAGGGTCCTACGTGCACGGAGTCTCGCTGATTGCTAGCACAGAAGTCTGAGATCAAACTGCAAGGCGGCAGCGAGGCTGGGGGAGGGGTGCCCGCCATTGCCCAGGCTTGCTTAGGTAAACAGAGCAGC	030	regLM	98	0.949941	0.0258043	1.01119	1.90055	0.0259102	0.0861532
gen_147	TCTCTGCTCCCCGGAGTCCCTGCACGTGGCTTGACAGTGGCCTTGGTAGGACCCACTGGGGTGTTTCTTCGTCGCCCATGGGCCCTCATGCTGTTATCAGTTGGAAATGAATCAGAGATTAGGAAGCGGGGGGAGTGGTGGGGGTGTTATCGCCCAGTGCACACGGGGCTCTCAGCTAATCTCTGGCGGCCCTGGGCCAT	030	regLM	5	0.80166	5.7595	-0.120288	1.00938	5.75956	0.147524
gen_148	CCATCTGTTCCATCCTCACCCACCCAAGGAGCCGCCCCTGCTCCTAGAGACTCTGGGCACCACTGATAAGGGTGGGTACCAGGAACTCCACCCTTTACCGAGAAAGGCAGGCTGGTTTATCGCCACTCAGACCCAGCCAGCGACCACCCTGGGGAGTGTGTCAGCCACCAGGAGCATCGCTGTTGGGGAGTGGTGAGTGT	030	regLM	84	0.124342	7.32614	0.730743	0.034706	7.32617	1.45684
gen_149	TCTCTGCTCCCCAGAGTCCCTGCACGTGGCTTGACAGTGGCCTTGGTAGGACCCACTGGGGTGTTTCTTCGTCGCCCATGGGCCCTCATGCTGTTATCAATTGGAAATGAATCAGAGATTAGGAAGCGGGGGGAGTGGTGGGGGTGTTATCGCCCAGTGCACACGGGGCTCTCAGCTAATCTCTGGCGGCCCTGGGTTCG	030	regLM	0	-0.0658092	5.31816	-0.312906	0.196971	5.3183	0.051081
gen_150	GTTTAGCGTAAGAATCAGGGTCCAGCTGGTGCTCCCTAAACAGCAGCTGCTGTTCACTGTTGAAAGGCGCTCTGGAAGGCCAGGTGCGGTGGCTCATGCTTGTAATCCCAGCACTGTGGGAGGCCGAGGTGGGTGGATCACCTGAGGTAGGGAGTTCGAGACCAGCCTGACCAACGTGGAGAAACCCCATCTCTCCTAAA	030	regLM	62	0.0100649	2.34089	3.20765	0.127993	2.34089	0.431074
gen_151	TCTCTGCTCCCCAGAGTCCCTGCACGTGGCTTGACAGTGGCCTTGGTAGGACCCACTGGGGTGTTTCTTCGTCGCCCATGGGCCCTCATGCTGTTATCAATTGGAAATGAATCAGAGATTAGGAAGCGGGGGGAGTGGTGGGGGTGTTATCGCCCAGTGCACACGGGGCTCTCAGCTAATCTCTGGCGGCCCTGGGTGAG	030	regLM	2	0.00320226	5.45233	-0.199348	0.287824	5.45234	0.0947735
gen_152	CCTGAGAAAGGCTTCAACTAAAGAGCTATGGACAGGGACACTCTGTCACTTCCTGGGATTTTGACCCCCAGCTGTCCAACAGAGGAGGGTCTGTGCCTTCGCTCATTAGCCTAACTTAGATGATAGGTGACAAACTGAAGTGAGCTATGGGGAGAGGTACCTCATTTATCTGTTGCTGGGTGTGTCACAGCTGGAGAGAG	030	regLM	25	0.028799	2.40383	-0.585449	-0.171761	2.40391	-0.763124
gen_153	CCTGAGAAAGGCTTCAACTAAAGAGCTATGGACAGGGACACTCTGTCACTTCCTGGGATTTTGACCCCCAGCTGTCCAACAGAGGAGGGTCTGTGCCTTTGCTCATTAGCCTAACTTAGATGATAGGTGACAAACTGAAGTGAGCTATAGGGAGTTGTCCACTTCCAGGCTGTTATCCTTGAGGCTGCTAAGAGCATCTG	030	regLM	17	-0.134147	0.294581	-0.505597	-0.174734	0.294536	-0.74809
gen_154	CCATCTGTTCCATCCTCACCCACCCAAGGAGCCGCCCCTGCTCCTAGAGACTCTGGGCACCACTGATAAGGGTGGGTACCAGGAACTCCACCCTTTACCGAGAAAGGCAGGCTGGTTTATCGCCACTCAGACCCAGCCAGCGACCACCCTGGGGAGTGTGTCAGCCACCAGGAGCATCGCTGTTGGGGAAATATTATTAT	030	regLM	84	-0.0647969	7.37639	0.373167	0.0040244	7.37636	1.23176
gen_155	CCTGAGAAAGGCTTCAACTAAAGAGCTATGGACAGGGACACTCTGTCACTTCCTGGGATTTTGACCCCCAGCTGTCCAACAGAGGAGGGTCTGTGCCTTTGCTCATTAGTCCATTTTACAATTCTTTTTATTTTATTTTATTTTATTTTATTTTATTTTATTTTATTTTATTTTATTTTATTTTATTTTATTTTATTTTA	030	regLM	60	0.15973	0.221832	0.433893	0.215298	0.221806	0.594958
gen_156	CCATCTGTTCCATCCTCACCCACCCAAGGAGCCGCCCCTGCTCCTAGAGACTCTGGGCACCACTGATAAGGGTGGGTACCAGGAACTCCACCCTTTACCGAGAAAGGCAGGCTGGTTTATCGCCACTCAGACCCAGCCAGCAACCACCCTGGGGAGTGTGTCAGCCACCAGGAGCATCGCAGATGCCATTCCTGCCAGGC	030	regLM	88	-0.119134	7.75255	0.763257	0.003822	7.75244	1.55008
gen_157	CATGTTGCCTATGGTATTATAAGAATTGAAAGAAGGCCAGGCGCAGTGGCTCACACCTGTAATCCCAGCACTTTGGGAGGCTGAGGCGGGCAGATCACTTGAGGTCAGGAGTTCGAGACCAGCCTGGCCAACATGGTGAAACCCCATCTCTACTAAAAATACAAAAATTAGCTGGGTGTGGTGGTGCATGCCTGTAATCC	030	regLM	38	-0.134234	3.94735	2.83333	0.191448	3.94722	2.19215
gen_158	CTCAGAATTAATGGAGAGGGCCAGTGGCGGCCTGTGCCCTTTGTCCCACCGGCCGGCCTGGGGGTGGCGGCTCCAGAATACAGGGTCCTATTGTGTGCCCTGATGTCAGGCAGCTGGACTGCTGGGAGTGAGGATAAACAAGCAGCTGGAGCATCTCGCCTGAAGCCGCTGAGGTGTGGCAGGACCTGTTGCCTATTGGC	030	regLM	99	2.62796	0.0511907	0.454643	2.1953	0.0512289	0.855075
gen_159	GAAAGGATACTCTGGCTGTCATGTGGACTGGAGGGAGCTGGAATTGAGGCAGTGAGCCCAGCTACCAGAGTCTTGAAATAGTTTAGTGTAAGATGCTGAATCATGAATTGGGGCAGAGAGGATAACAAAGTAGGGAAGTGGGGGTAGAGACAGTCGTAAGACCTGAGGAGGGAATGGCTAAGTGAGGGTTGAAGGAGGAA	030	regLM	93	0.0174767	2.27535	0.656795	0.0340923	2.2754	0.391739
gen_160	TCTCTGCTCCCCGGAGTCCCTGCACGTGGCTTGACAGTGGCCTTGGTAGGACCCACTGGGGTGTTTCTTCGTCGCCCATGGGCCCTCATGCTGTTATCAGTTGGAAATGAATCAGAGATTAGGAAGCGGGGGGAGTGGTGGGGGTGTTATCGCCCAGTGCACACAGGTTACCACAGACATTTAGCCCTCACTGCAGTTTC	030	regLM	21	0.824696	5.06143	-0.497875	0.523669	5.06148	-0.17706
gen_161	GACTCCCGCATGCTGTACTTCTGGTTCTCTGAGCGAGTCTTCCACTCGCTGGCCAAGGTAGCTTTCCAGGATGGCCGCCTCATGCTCAGCCTGATGGGAGACGAGTTCAAGGTGAGTGGGTGGGGCTGGGCTGCTAGGGGATCCAGATGGCATGTGGTATGTGTGTGTGTGCACACGCATGGGGAGGAGGGAGGAAACTC	030	regLM	97	1.90259	1.75342	0.425316	1.02273	1.7533	1.14418
gen_162	CCAGTAATGGGATGGCTGGGTCCAATGGTATTTCTAGTTCTAGATCCCTGAGGAATTGCCACACTGACTTCCACAATGGTTGAACTAGTTTACAGTCCCGCCAACAGTGTAAAATTATTCCTATTTCTCCACATCCTCTCCAGCACCTGTTGTTTCCTGACTTTTTAATGATCGTCATTCTAACTGGTGTGAGATGGTAT	030	regLM	6	-0.608407	0.464364	-0.520465	-0.210443	0.464294	-0.462923
gen_163	CTACTTGGGAGGCTGAGACAGAAGAATGGCATGAACCTGGGAGACTGAGACAGGAGAATGGCATGAACCTGGGAGACGGAGGTTGCAGTGAGCCGAGATCACGCCACTGCACTCCAGCCTGGGCGAGAGAGAGAGAGAGAGAGAGAGAGAGAGAGAGAGAGAGAGAGAGAGAGAGAGAGAGAGAGAGAGAGAGAGAGAGA	030	regLM	89	0.398032	2.48228	2.26689	0.319867	2.48222	0.755196
gen_164	CTAGCTGTACCAGCCGCTGCCCCGGACCTGCTGCCCTGCCCCACCCCCCCCTCCCCTGGCCAGCCTCCCCAGAGGCCAGAAGGCGCCTTATCGGGCAGGGTTAAGGAGGGGGACAGTTATCAGGGGCTGCAGCCTAGATTGGGCCACAATGTCCTCGTCTCTTGAGGGTGGCAGGCTGTGCAGGCTCCCTGACAGGGGCC	030	regLM	7	0.54781	4.76237	0.684274	0.317175	4.76235	0.755736
gen_165	GAAAGGATACTCTGGCTGTCATGTGGACTGGAGGGAGCTGGAATTGAGGCAGTGAGCCCAGCTACCAGAGTCTTGAAATAGTTTAGTGTAAGATGCTGAATCATGAATTGGGGCAGAGAGGATAACAAAGTAGGGAAGTGGGGGTAGAGACAGTCGTAAGACCTGAGGAGGAAATGGCTAAGTGAGGGTTGAAGGAGGAA	030	regLM	93	0.512159	2.85006	0.974433	0.554601	2.85039	1.45752
gen_166	CCTGAGAAAGGCTTCAACTAAAGAGCTATGGACAGGGACACTCTGTCACTTCCTGGGATTTTGACCCCCAGCTGTCCAACAGAGGAGGGTCTGTGCCTTTGCTCATTAGCCTAACTTAGATGATAGGTGACAAACTGAAATGAGCTATAGGGAGTTGTCCACTTCCAGGCTGCTATCAGTGTGACAGAGGTTGGAAACTT	030	regLM	14	-0.0801113	1.22914	-0.780271	-0.164021	1.22907	-0.78197
gen_167	ATTAGCATGGAATTTGGACTTTGGAGCCATAATCCTGTTGTCTTCTTTCATTTAAAGAATATGGGCCAGGCGCGGTGGCTCACGCCTGTAATCCCAGCACTTTGGGAGGCCAAGGCAGGTGGATCACGAGGTCAGGAGATCGAGACCATCCTGGCTAACACAGTGAAACCCTGTCTCTACTAAAAATACAAAAAAATTAG	030	regLM	60	0.0777153	3.22073	1.57033	0.721488	3.22063	2.37847
gen_168	CCCGAATACTGTGCTTTTCCGACGGGCTTAGGAAACGGCACACCAGGATATTATATCCCGCACCTGGCTCGGAGGGTCCTACGCCCACGGAGTCTCGCTGATTGCTAGCACAGAAGTCTGAGATCAAACTGCAAGGCGGCAGCGAGGCTGGGGGAGGGGTGCCCGCCATTGCCCAGGCTTGCTTAGGTAAACAGAGCAGC	030	regLM	99	1.01139	0.139688	1.30318	1.76775	0.139782	0.352547
gen_169	TCCTGAATGGGCAAAAACTGGAAGCATTCCCTTTGAAAACTGGCACAAGACGGGGATGCCCTCTCTCACCGCTCCTATTCAACATAGTGTTGGAAGTTCTGGCCAGGGCAATCAGGCAGGAGAAAGAAATAAAGGGTATTCAATTAGGAAAAGAGGAAGTCAAATTGTCCCTGTTTGCAGATGACATGACTGTATATTTA	030	regLM	20	-0.0876684	0.188141	-0.421866	0.378839	0.188252	-0.0486674
gen_170	CCATCTGTTCCATCCTCACCCACCCAAGGAGCCGCCCCTGCTCCTAGAGACTCTGGGCACCACTGATAAGGGTGGGTACCAGGAACTCCACCCTTTACCAAGAAAGGCAGGCTGGTTTATCGCCACTCAGACCCAGCCAGCAACCACCCTGGGGAGTGTGTCAGCCACCAGGAGCATCGCTGTTGGGGAAATGTTATTTC	030	regLM	84	0.507168	7.66927	0.422197	0.112258	7.66927	1.61768
gen_171	TCTCTGCTCCCCGGAGTCCCTGCACGTGGCTTGACAGTGGCCTTGGTAGGACCCACTGGGGTGTTTCTTCGTCGCCCATGGGCCCTCATGCTGTTATCAGTTGGAAATGAATCAGAGATTAGGAAGCGGGGGGAGTGGTGGGGGTGTTATCGCCCAGTGCACACAGGTTACCACAGAGGTCACACGGTAGGTGAGGGGCA	030	regLM	22	0.743179	4.58805	-0.957036	0.673155	4.58811	-0.563352
gen_172	TATGTGGTCTCATATTTTGTTGCAGTGTCACCTCAAAATAATCAGAATTTTCACATTTAAAGATTTTTTTTCTAATCAGGAAGTGGGAATTAGTAGAGCTTCTTTGCTTTGTCTTCACCTTCTCTGACAGAAAACTTCCTCTGTGGTCACGACATTTCAAAATAAAACCCTTCCTGTACCCAAGAGATAAGAAACTTTTA	030	regLM	97	0.606427	3.60511	0.668885	0.988426	3.60512	1.10305
gen_173	TCTCTGCTCCCCAGAGTCCCTGCACGTGGCTTGACAGTGGCCTTGGTAGGACCCACTGGGGTGTTTCTTCGTCGCCCATGGGCCCTCATGCTGTTATCAGTTGGAAATGAATCAGAGATTAGGAAGCGGGGGGAGTGGTGGGGGTGTTATCGCCCAGTGCACACAGGTTACCACAGAGGTCACACGGTAGGTAACCTGAT	030	regLM	24	0.96067	4.66261	-0.824402	1.35638	4.66248	-0.5264
gen_174	CCAGTAATGGGATGGCTGGGTCCAATGGTATTTCTAGTTCTAGATCCCTGAGGAATTGCCACACTGACTTCCACAATGGTTGAACTAGTTTACAGTCCCACCAACAGTGTAAAATTATTCCTATTTCTCCACATCCTCTCCAGCACCTGTTGTTTCCTGACTTTTTTATTGTTTGTATATATATATATATATATATATAT	030	regLM	23	-0.524734	-0.103968	-0.508823	-0.0656029	-0.103995	-0.344406
gen_175	ATATTGGTACAGCACATTTGTCGCTATTAATAAACCAGTATCCAGGGCCAGGTGCAGTGGCTCACGCCTGTAATCCCAGCACTTTGGGAGGCCGAGGTGGGTGGATCACCTGAGGTCAGGAGTTCGAGACCAGGCTGACCAACATGGGAAAACCCTGTCTCTACTAAAAATACAAAATTAGCTGGGCTTGGTGGTGCATG	030	regLM	47	-0.237891	2.94804	2.95832	0.0210828	2.94806	1.00734
gen_176	CCAGTAATGGGATGGCTGGGTCCAATGGTATTTCTAGTTCTAGATCCCTGAGGAATTGCCACACTGACTTCCACAATGGTTGAACTAGTTTACAGTCCCGCCAACAGTGTAAAATTATTCCTATTTCTCCACATCCTCTCCAGCACCTGTTGTTTCCTGCCTTTTTTATTGCTATTTTTTTTGAGACGGAGTCTCGCTCT	030	regLM	22	-0.272396	0.414611	-0.291062	-0.00695602	0.414367	-0.164473
gen_177	GAACTGCTGGGTTGGGTACCTGCCAGTGTTCAGGCAGCAGTTACATAAGAGCTGCTTTTTTTCCTGGAATTTAGGCTCACTGCTGATGTGTGACCTTCAGCAGTAATTGCCAGTAAATGCAGTGGGGCTGTTTACTGTTAGACACTGGCTACCACAGAGCAAACTCAACTCAGAACATACAGAACCTATTGCAAAGTCAG	030	regLM	97	3.66763	1.19592	0.0166801	3.78659	1.19599	-0.0311839
gen_178	CATTCCATTCCATTCCATTCTGCATTCTGTTCCATTCTCCATTCCATTCCATTCTCCATACCATCCTCCATTCCATTACACTGCATTCCATTCTCCATTATATTTTATTCACCACGGCATTCCATTACATTTTCCATTCCATTCTATTCTCCATTCCATTCCATATTCTATTCCTTTCTCCATTCCATTCCCCTTTCCAT	030	regLM	91	-0.904896	-0.431661	3.65612	-0.362034	-0.431666	-0.873196
gen_179	GTTTAGCGTAAGAATCAGGGTCCAGCTGGTGCTCCCTAAACAGCAGCTGCTGTTCACTGTTGAAAGGCGCTCTGGAAGGCCAGGTGCGGTGGCTCATGCTTGTAATCCCAGCACTGTGGGAGGCCGAGGTGGGCGGATCACCTGAGGTGAGGAGTTCGAGACCAGCCTGACCAACGTGGAGAAACCCCATCTCTCCTAAA	030	regLM	62	0.0870613	2.41645	3.14415	0.296393	2.41637	0.679898
gen_180	TCTCTGCTCCCCAGAGTCCCTGCACGTGGCTTGACAGTGGCCTTGGTAGGACCCACTGGGGTGTTTCTTCGTCGCCCATGGGCCCTCATGCTGTTATCAGTTGGAAATGAATCAGAGATTAGGAAGCGGGGGGAGTGGTGGGGGTGTTATCGCCCAGTGCACACGGGGCTCTCAGCTAATCTCTGGCGGCCCTGGATTTC	030	regLM	4	0.68045	5.58042	-0.208468	0.626644	5.58039	0.044292
gen_181	AGAATTGGAAGGAGCTTAGGGGAAAGCTAGCCTCAGGTCAGAATTGCCTGCATGCCACTCGGCTAGTGAGCTGCTGAATCACCTTATTCCTGGAGAAAGATTTTGTTTTTTATTTTATTTTATTTTATTTTATTTTATTTTATTTTATTTTATTTTATTTTATTTTATTTTATTTTATTTAACATAAGACTTTGAGTTGT	030	regLM	96	0.217452	0.255154	0.609055	0.198377	0.255167	0.863226
gen_182	ACTGGGATTGCTTGGTTGAATGGTAGTTCCATTTTTAGTTCTTTGAGAAATCTCCAAACTGCTTTCCACAGCAGCTTAACTAATTTACATTCCCACCAGCACTGTCTTAAGTGCTTCCTTTTCTCCGCAGTCTTGCCAGCATCTGTAATTTTTTGACTTTTTAATGATATTCTTTATGACTGGTGCAAGATGGTATCTCA	030	regLM	53	-0.0348041	0.623521	0.605278	0.215241	0.623488	0.468191
gen_183	TCTCTGCTCCCCAGAGTCCCTGCACGTGGCTTGACAGTGGCCTTGGTAGGACCCACTGGGGTGTTTCTTCGTCGCCCATGGGCCCTCATGCTGTTATCAGTTGGAAATGAATCAGAGATTAGGAAGCGGGGGGAGTGGTGGGGGTGTTATCGCCCAGTGCACACAGGTTACCACAGATGAAATGAGTGTGACTTGTTTCA	030	regLM	21	0.699539	4.92209	-1.02884	0.401083	4.92216	-0.404578
gen_184	CCTCAGAATTAATGGAGAGGGCCAGTGGCGGCCTGTGCCCTTTGTCCCACTGGCCGGCCTGGGGGTGGCGGCTCCAGAATACAGGGTCCTATTGTGTGCCCTGATGTCAGGCAGCTGGACTGCTGGGAGTGAGGATAAACAAGCAGCTGGAGCATCTCGCCTGAAGCCCCAGGAGAGGGCCAGAGCCCCTGCAGCAACAG	030	regLM	96	3.10183	0.118598	1.51375	2.41963	0.118576	1.34084
gen_185	AGAAAAAAACAAACAACCCCATCAACAAGTGGGCGAAGGATATGAACAGACACTTCTCAAAAGAAGATATTTATTCAACCAAAAGACACATGAAAAAATGCTCATCATCACTGGCCATCAGAGAAATGCAAATCAAAACCACAATGAGATACCATCTCACACCAGTTAGAATGGCGATCATTCAAAAGTCAGGAAACCAC	030	regLM	45	-0.441973	1.27522	-0.0216528	-0.158975	1.27529	-0.295319
gen_186	ACTGGGATTGCTTGGTTGAATGGTAGTTCCATTTTTAGTTCTTTGAGAAATCTCCAAACTGCTTTCCACAGCAGCTTAACTAATTTACATTCCCACCAGCACTGTCTTAAGTGTTTCCTTTTCTCCGCAGCCTTGCCAACATCTGTAATTTTTTGACTTTTTAATGATATTCTTTATGACTGGTGCAAGATGGTATATCA	030	regLM	53	-0.0511663	0.293053	0.502048	0.192825	0.293071	0.241483
gen_187	GATGGGTGCCTCTCCATGGAGCTCACATGTCATACTGCGCCCTGACTCATCACATGTCATTGTTCCTTTGTATTAATTTTCTGTCATCTACAGTGAGTTCCTTGAGGGCAGGGAAAGGGCTTTTTATCTCTGCATTACCAGAGCCCAACAGATACACACTGGTTCTTATTAGTCTAATTTAAAAAAAAAAAAAAAAAAAA	030	regLM	21	0.0709517	4.72539	0.218904	0.330377	4.72541	0.29835
gen_188	CCATCTGTTCCATCCTCACCCACCCAAGGAGCCGCCCCTGCTCCTAGAGACTCTGGGCACCACTGATAAGGGTGGGTACCAGGAACTCCACCCTTTACCAAGAAAGGCAGGCTGGTTTATCGCCACTCAGACCCAGCCAGCGACCACCCTGGGGAGTGTGTCAGCCACCAGGAGCATCGCTGTTGGGGAATGGGTTGGAG	030	regLM	84	-0.173144	6.53558	0.327747	-0.117135	6.53565	1.09403
gen_189	ACTGGGATTGCTTGGTTGAATGGTAGTTCCATTTTTAGTTCTTTGAGAAATCTCCAAACTGCTTTCCACAGCAGCTTAACTAATTTACATTCCCACCAGCACTGTCTTAAGTGTTTCCTTTTCTCCACAGCCTTGCCAACATCTGTAATTTTTTGACTTTTTAATGATATTCTTTATGACTGGTGCAAGATGGTATCTCA	030	regLM	51	0.0906161	1.02776	0.554477	0.231973	1.02759	-0.0368577
gen_190	GATTTTTCTACTGCTAGGTTTTCCTTTTGGGGTTACGATTATTACAGGTGGCAATCAGTTAACTTAGTGGTTCTGTAGGCACCGCCCTATCTTCCAACTCACTTACATTTAAAAATTCACACAGAGAGGCTAGTGGGAAGCGGGTAGGTGTAAACAATGTGCTACAGTGAGAATCCAGGGGCCTCTCTGGGGGGCAGGAG	030	regLM	101	0.714503	1.64298	0.0991502	0.459294	1.64309	0.383593
gen_191	GTTTAGCGTAAGAATCAGGGTCCAGCTGGTGCTCCCTAAACAGCAGCTGCTGTTCACTGTTGAAAGGCGCTCTGGAAGGCCAGGTGCGGTGGCTCATGCTTGTAATCCCAGCACTGTGGGAGGCCGAGGTGGGCGGATCACCTGAGGTAAGGAGTTCAAGACCAGCCTGACCAACGTGGAGAAACCCCATCTCTCCTAAA	030	regLM	61	0.113595	2.20983	2.80566	0.338238	2.20983	0.512727
gen_192	ACTGGGATTGCTTGGTTGAATGGTAGTTCCATTTTTAGTTCTTTGAGAAATCTCCAAACTGCTTTCCACAGCAGCTTAACTAATTTACATTCCCACCAGCACTGTCTTAAGTGTTTCCTTTTCTCCGCAGCCTTGCCAACATCTGTAATTTTTTGACTTTTTAATGATATTCTTTATGGCTGCTGTAATATATTCCCTTG	030	regLM	59	0.0331279	0.273451	0.725267	0.248003	0.273441	0.678536
gen_193	GATTTTTCTACTGCTAGGTTTTCCTTTTGGGGTTACGATTATTACAGGTGGCAATCAGTTAACTTAGTGGTTCTGTAGGCACCGCCCTATCTTCCAACTCACTTACATTTAAAAATTCACACAGAGAGGCTAGTGGGAAGCGGGTAGGTGTAAACAATGTGCTACAGTGAGAAAGATGCTGCCAGTTACCAAAGTCAAAA	030	regLM	100	0.153715	0.572436	0.143286	-0.00574524	0.572511	0.103923
gen_194	TCTCTGCTCCCCAGAGTCCCTGCACGTGGCTTGACAGTGGCCTTGGTAGGACCCACTGGGGTGTTTCTTCGTCGCCCATGGGCCCTCATGCTGTTATCAGTTGGAAATGAATCAGAGATTAGGAAGCGGGGGGAGTGGTGGGGGTGTTATCGCCCAGTGCACACAGGTTACCACAGACGTTTAACAGCAGGCAATCAAGA	030	regLM	24	1.09	5.10301	-0.611437	0.676336	5.10298	-0.323851
gen_195	TCTCTGCTCCCCAGAGTCCCTGCACGTGGCTTGACAGTGGCCTTGGTAGGACCCACTGGGGTGTTTCTTCGTCGCCCATGGGCCCTCATGCTGTTATCAGTTGGAAATGAATCAGAGATTAGGAAGCGGGGGGAGTGGTGGGGGTGTTATCGCCCAGTGCACACAGGTTACCACAGACATTTAGCCCTCACTGCAGCTTT	030	regLM	22	0.857298	5.12196	-0.492532	0.503597	5.12201	-0.101614
gen_196	AGAATTGGAAGGAGCTTAGGGGAAAGCTAGCCTCAGGTCAGAATTGCCTGCATGCCACTCGGCTAGTGAGCTGCTGAATCACCTTATTCCTGGAGAAAGATTTTGTTTTTTATTTTATTTTATTTTATTTTATTTTATTTTATTTTATTTTACTTTATTATTATTATTATTATTATTATTATTATTATTATTATTATTAT	030	regLM	95	0.110164	0.348891	0.388144	0.079107	0.348891	0.523262
gen_197	TCTCTGCTCCCCGGAGTCCCTGCACGTGGCTTGACAGTGGCCTTGGTAGGACCCACTGGGGTGTTTCTTCGTCGCCCATGGGCCCTCATGCTGTTATCAGTTGGAAATGAATCAGAGATTAGGAAGCGGGGGGAGTGGTGGGGGTGTTATCGCCCAGTGCACACGGGGCTCTCAGCTAATCTCTGGCGGCCCTGGGTGAG	030	regLM	3	0.764824	5.7839	-0.237049	0.941372	5.78382	0.113371
gen_198	CCAGTAATGGGATGGCTGGGTCCAATGGTATTTCTAGTTCTAGATCCCTGAGGAATTGCCACACTGACTTCCACAATGGTTGAACTAGTTTACAGTCCCACCAACAGTGTAAAATTATTCCTATTTCTCCACATCCTCTCCAGCACCTGTTGTTTCCTGACTTTTTTATTGTTTGTATTTTTAGTAGAGACAGGGTTTCT	030	regLM	23	-0.369439	0.36262	-0.304793	-0.0517521	0.362654	-0.250548
gen_199	AGAAAAAAACAAACAACCCCATCAACAAGTGGGCGAAGGATATGAACAGACACTTCTCAAAAGAAGATATTTATTCAACCAAAAGACACATGAAAAAATGCTCATCATTACTGGCCATCAGAGAAATGCAAATCAAAACCACAATGAGATACCATCTCACACCAGTTAGAATGGCGATCATTGAAAAGTCAGGAAGCAAC	030	regLM	45	-0.467922	1.50139	0.067378	-0.217036	1.5016	-0.35694
gen_200	CCATCTGTTCCATCCTCACCCACCCAAGGAGCCGCCCCTGCTCCTAGAGACTCTGGGCACCACTGATAAGGGTGGGTACCAGGAACTCCACCCTTTACCGAGAAAGGCAGGCTGGTTTATCGCCACTCAGACCCAGCCAGCAACCACCCTGGGGAGTGTGTCAGCCACCAGGAGCATCGCTGTTGGGGAAATGTTATCTC	030	regLM	84	0.477831	8.25675	0.763868	0.364181	8.25684	1.66566
gen_201	GTTTAGCGTAAGAATCAGGGTCCAGCTGGTGCTCCCTAAACAGCAGCTGCTGTTCACTGTTGAAAGGCGCTCTGGAAGGCCAGGTGCGGTGGCTCATGCTTGTAATCCCAGCACTGTGGGAGGCCGAAGTGGGCGGATCACCTGAGGTAAGGAGTTCGAGACCAGCCTGACCAACGTGGAGAAACCCCATCTCTCCTAAA	030	regLM	63	0.152609	2.55234	3.31815	0.355547	2.55223	0.688572
gen_202	CCAGTAATGGGATGGCTGGGTCCAATGGTATTTCTAGTTCTAGATCCTTGAGGAATCGCCACACTGACTTCCACAATGGTTGAACTAGTTTACAGTCCCACCAACAGTGTAAAATTATTCCTATTTCTCCACATCCTCTCCAGCACCTGTTGTTTCCTGACTTTTTAATGATCGCCATTCTAACTGGTGTGAGATGGTAT	030	regLM	5	-0.583385	0.19018	-0.496506	-0.205081	0.190226	-0.541713
gen_203	TCTCTGCTCCCCAGAGTCCCTGCACGTGGCTTGACAGTGGCCTTGGTAGGACCCACTGGGGTGTTTCTTCGTCGCCCATGGGCCCTCATGCTGTTATCAGTTGGAAATGAATCAGAGATTAGGAAGCGGGGGGAGTGGTGGGGGTGGTATTGGGGCAAAAAGCCAAGGGGTGGCAAGCCTGGGAAATAGCAGGCTCCCAT	030	regLM	33	0.411159	1.95959	-0.142587	0.188181	1.9595	0.142517
gen_204	CCTGAGAAAGGCTTCAACTAAAGAGCTATGGACAGGGACACTCTGTCACTTCCTGGGATTTTGACCCCCAGCTGTCCAACAGAGGAGGGTCTGTGCCTTCGCTCATTAGCCTAACTTAGATGATAGGTGACAAACTGAAATGAGCTATAGGGAGTTGTCCACTTCCAGGCTGCTATCACTGTCTCAGATGTTGTATGTGT	030	regLM	12	-0.0233309	0.962121	-0.477256	-0.155256	0.96207	-0.661092
gen_205	CCTGAGAAAGGCTTCAACTAAAGAGCTATGGACAGGGACACTCTGTCACTTCCTGGGATTTTGACCCCCAGCTGTCCAACAGAGGAGGGTCTGTGCCTTTGCTCATTAGCCTAACTTAGATGATAGGTGACAAACTGAAGTGAGCTATGGGGAGAGGTACCTCATTTATCTGTTGCTGGGTGTGTCACAGCAGGCCATGC	030	regLM	26	0.146549	1.93681	-0.724575	-0.187235	1.93679	-0.816406
gen_206	CCAGTAATGGGATGGCTGGGTCAAATGGTATTTCTAGTTCTAGATCCCTGAGGAATTGCCACACTGACTTCCACAATGGTTGAACTAGTTTACAGTCCCACCAACAGTGTAAAATTATTCCTATTTCTCCACATCCTCTCCAGCACCTGTTGTTTCCTGCCTTTTTAATGATCACCATTCTAACTGGTGTGAGATGGTAT	030	regLM	2	-0.590145	-0.0276687	-0.486896	-0.151613	-0.0276763	-0.474055
gen_207	TCTCTGCTCCCCAGAGTCCCTGCACGTGGCTTGACAGTGGCCTTGGTAGGACCCACTGGGGTGTTTCTTCGTCGCCCATGGGCCCTCATGCTGTTATCAGTTGGAAATGAATCAGAGATTAGGAAGCGGGGGGAGTGGTGGGGGTGTTATCGCCCAGTGCACACGGGGCTCTCAGCTAATCTCTGGCGGCCCTGGGTGAG	030	regLM	3	0.778232	5.85852	-0.217379	0.980881	5.85845	0.147491
gen_208	ATATTGGTACAGCACATTTGTCGCTATTAATAAACCAGTATCCAGGGCCAGGTGCAGTGGCTCACGCCTGTAATCCCAGCACTTTGGGAGGCCGAGGTGGGCGGATCACCTGAGGTCAGGAGTTCGAGACCAGCCTGACCAACATGGGAAAACCCTGTCTCTACTAAAAATACAAAATTAGCTGGGCTTGGTGGTGCATG	030	regLM	47	-0.142981	3.39565	3.79241	0.33877	3.39611	1.74964
gen_209	TCTCTGCTCCCCAGAGTCCCTGCACGTGGCTTGACAGTGGCCTTGGTAGGACCCACTGGGGTGTTTCTTCGTCGCCCATGGGCCCTCATGCTGTTATCAGTTGGAAATGAATCAGAGATTAGGAAGCGGGGGGAGTGGTGGGGGTGTTATCGCCCAGTGCACACGGGGCTCTCAGCTAATCTCTGGCGGCCCTGGGTCCG	030	regLM	2	0.677656	5.78478	-0.231375	0.892718	5.78477	0.0846333
gen_210	ACTGGGATTGCTTGGTTGAATGGTAGTTCCATTTTTAGTTCTTTGAGAAATCTCCAAACTGCTTTCCACAGCAGCTTAACTAATTTACATTCCCACCAACAGTGTAAAAATGTTCCTATTTCTCCACATCCTCTCCAGTATCTGTTGTTTCCTGACTTTTTAATGATCACTATTCTAACTGGTGTGAGATGGTATCTCAT	030	regLM	31	-0.265522	2.07065	0.0226485	-0.0364304	2.07172	-0.115277
gen_211	TCCTGAATGGGCAAAAACTGGAAGCATTCCCTTTGAAAACTGGCACAAGACAGGGATGCCCTCTCTCACCGCTCCTATTCAACATAGTGTTGGAAGTTCTGGCCAGGGCAATCAGGCAGGAGAAGGAAATAAAGGGTATTCAATTAGGAAAAGAGGAAGTCAAATTGTCCCTGTTTGCAGATGACATGACTGTATATTTA	030	regLM	18	-0.0839064	0.0165357	-0.293623	0.284034	0.0165226	-0.0283513
gen_212	ACTGGGATTGCTTGGTTGAATGGTAGTTCCATTTTTAGTTCTTTGAGAAATCTCCAAACTGCTTTCCACAGCAGCTTAACTAATTTACATTCCCACCAGCACTGTCTTAAGTGTTTCCTTTTCTCCGCAGTCTTGCCAGCATCTGTAATTTTTTGACTTTTTAATGATATTCTTTATGACTGGTGCAGGATGGTATCCCA	030	regLM	54	0.0343428	0.35003	0.663628	0.213746	0.350095	0.686364
gen_213	CATGAGGAGCGTTTGTAGCAGTCACTGAATCACCTCATGACTAGCGGGGCAAGCCTCTAATTCACCGCAGGATTTCCGGTAGGTTGGATTGTGGGGTTGGTGTTTGCACTCCAAAGAGTTGCTGTGATTTCCCTGTATCTGTCTTTCTGGCTTGTTAGATCTTCTCATTTGGCGTCCTTTCTCCGAAGAGTTATTCTGAT	030	regLM	100	1.55528	0.479294	3.75444	1.58699	0.479328	1.60432
gen_214	CCAGTAATGGGATGGCTGGGTCCAATGGTATTTCTAGTTCTAGATCCCTGAGGAATCGCCACACTGACTTCCACAATGGTTGAACTAGTTTACAGTCCCACCAACAGTGTAAAATTATTCCTATTTCTCCACATCCTCTCCAGCACCTGTTGTTTCCTGACTTTTTAATGATCGCCATTCTAACTGGTGTGAGATGGTAT	030	regLM	4	-0.556828	0.107478	-0.498774	-0.187902	0.107542	-0.539093
gen_215	ACTGGGATTGCTTGGTTGAATGGTAGTTCCATTTTTAGTTCTTTGAGAAATCTCCAAACTGCTTTCCACAGCAGCTTAACTAATTTACATTCCCACCAGCACTGTCTTAAGTGTTTCCTTTTCTCCGCAGCCTTGCCAACATCTGTAACTTTTTGACTTTTTGATGATGGCCATTCTAACTGGTGTGAGATGGTATCTCA	030	regLM	48	-0.0539378	0.950941	0.488314	0.361817	0.951058	0.33051
gen_216	GTTTAGCGTAAGAATCAGGGTCCAGCTGGTGCTCCCTAAACAGCAGCTGCTGTTCACTGTTGAAAGGCGCTCTGGAAGGCCAGGTGCGGTGGCTCATGCTTGCAATCCCAGCACTGTGGGAGGCCGAGGTGGGCGGATCACCTGAGGTAAGGAGTTCGAGACCAGCCTGACCAACGTGGAGAAACCCCATCTCTCCTAAA	030	regLM	63	0.0906367	2.09139	2.86441	0.315135	2.09134	0.748273
gen_217	CCTGAGAAAGGCTTCAACTAAAGAGCTATGGACAGGGACACTCTGTCACTTCCTGGGATTTTGACCCCCAGCTGTCCAACAGAGGAGGGTCTGTGCCTTTGCTCATTAGCCTAACTTAGATGATAGGTGACAAACTGAAGTGAGCTATAGGGAGTTGTCCACTTCCAGGCTGCTATCAGTATACCAGCTGGGGTGTGGGA	030	regLM	1	-0.0948597	2.31302	-0.588132	-0.18143	2.31294	-0.812897
gen_218	CCAGTAATGGGATGGCTGGGTCCAATGGTATTTCTAGTTCTAGATCCCTGAGGAATTGCCACACTGACTTCCACAATGGTTGAACTAGTTTACAGTCCCGCCAACAGTGTAAAATTATTCCTATTTCTCCACATCCTCTCCAGCACCTGTTGTTTCCTGACTTTTTAATGATTGCCATTCTAACTGGTGTGAGATGGTAT	030	regLM	6	-0.61582	-0.0834889	-0.542842	-0.232621	-0.0834668	-0.552508
gen_219	CCCGAATACTGTGCTTTTCCGACGGGCTTAGGAAACGGCACACCAGGATATTATATCCTGCACCTGGCTCGGAGGGTCCTACGCCCACGGAGTCTCGCTGATTGCTAGCACAGAAGTCTGAGATCAAACTGCAAGGCGGCAGCGAGGCTGGGGGAGGGGTGCCCGCCATTGCCCAGGCTTGCTTAGGTAAACAGAGCAGC	030	regLM	98	1.12122	0.212609	1.61132	2.06943	0.212623	0.517156
gen_220	GAAAGGATACTCTGGCTGTCATGTGGACTGGAGGGAGCTGGAATTGAGGCAGTGAGCCCAGCTACCAGAGTCTTGAAATAGTTTAGTGTAAGATGCTGAGTCATGAGTTGGGGCAGAGAGGATAACAAAGTAGGGAAGTGGGGGTAGAGACAGTCGTAAGACCTGAGGAGGAAATGGCTAAGTGAGGGTTGAAGGAGGAA	030	regLM	94	1.77542	5.66189	3.32269	1.73102	5.66185	4.21631
gen_221	TCTCACCACTCCTATTCAACATAGTGTTGGAAGTTCTGGACAGGGCAATCAGGCAAGAGAAAGAAAGAAATAAAGGGTATTCAAATAGGAAAAGAGGAAATCAAATTGTCCCTGTTTGCAGATGACATGATTGTATATCTGGAAAGTCCCATCGTCTCAGCCCAAAATTTCCTTCAGCTAATAAGCAACTTCAGCAAAGT	030	regLM	4	-0.32854	0.493371	0.0159466	0.0193583	0.493384	-0.0168707
gen_222	CCAGTAATGGGATGGCTGGGTCCAATGGTATTTCTAGTTCTAGATCCCTGAGGAATTGCCACACTGACTTCCACAATGGTTGAACTAGTTTACAGTCCCACCAACAGTGTAAAAGTGTTCCTATTTCTCCACATCCTCTCCAGCACCTGTTGTTTCCTGACTTTTTAATGATTGCCATTCTAACTGGTGTGAGATGGTAT	030	regLM	8	-0.423972	-0.0965733	-0.364362	-0.189101	-0.0965731	-0.493469
gen_223	ATATTGGTACAGCACATTTGTCGCTATTAATAAACCAGTATCCAGGGCCAGGTGCAGTGGCTCACGCCTGTAATCCCAGCACTTTGGGAGGCCGAGGCAGGTGGATCACCTGAGGTCAGGAGTTCGAGACCAGCCTGATCAACATGGGAAAACCCTGTCTCTACTAAAAATACAAAATTAGCTGGGCTTGGTGGTGCATG	030	regLM	49	-0.312645	2.78366	2.9611	-0.20657	2.7837	0.518579
gen_224	CCTGAGAAAGGCTTCAACTAAAGAGCTATGGACAGGGACACTCTGTCACTTCCTGGGATTTTGACCCCCAGCTGTCCAACAGAGGAGGGTCTGTGCCTTCGCTCATTAGCCTAACTTAGATGATAGGTGACAAACTGAAATGAGCTATAGGGAGTTGTCCACTTCCAGGCTGCTATCAGTGCAGCAGGGCAACCCCTGCG	030	regLM	15	0.0142866	1.20355	-0.566841	-0.159486	1.20356	-0.662111
gen_225	GTTTAGCGTAAGAATCAGGGTCCAGCTGGTGCTCCCTAAACAGCAGCTGCTGTTCACTGTTGAAAGGCGCTCTGGAAGGCCAGGCGCGGTGGCTCATGCTTGTAATCCCAGCACTGTGGGAGGCCGAGGTGGGCGGATCACCTGAGGTAAGGAGTTCGAGACCAGCCTGACCAACGTGGAGAAACCCCATCTCTCTTAAA	030	regLM	63	0.322487	2.95652	4.03543	0.575464	2.95642	1.83973
gen_226	ATATTGGTACAGCACATTTGTCGCTATTAATAAACCAGTATCCAGGGCCGGGTGCAGTGGCTCACGCCTGTAATCCCAGCACTTTGGGAGGCCGAGGCAGGTGGATCACCTGAGGTCAGGAGTTCGAGACCAGCCTGACCAACATGGGAAAACCCTGTCTCTACTAAAAATACAAAATTAGCTGGGCTTGGTGGTGCATG	030	regLM	47	-0.247829	3.50427	3.15431	0.0994047	3.50398	1.32496
gen_227	TCTCTGCTCCCCAGAGTCCCTGCACGTGGCTTGACAGTGGCCTTGGTAGGACCCACTGGGGTGTTTCTTCGTCGCCCATGGGCCCTCATGCTGTTATCAGTTGGAAATGAATCAGAGATTAGGAAGCGGGGGGAGTGGTGGGGGTGTTATCGCCCAGTGCACACGGGGCTCTCAGCTAATCTCTGGCGGCCCGGGGCAGT	030	regLM	6	0.778939	5.84913	-0.0649094	0.993269	5.84906	0.227297
gen_228	CCATCTGTTCCATCCTCACCCACCCAAGGAGCCGCCCCTGCTCCTAGAGACTCTGGGCACCACTGATAAGGGTGGGTACCAGGAACTCCACCCTTTACCAAGAAAGGCAGGCTGGTTTATCGCCACTCAGACCCAGCCAGCAACCACCCTGGGGAGTGTGTCAGCCACCAGGAGCATCGCTGTTGGGGAATGGGTTGGGG	030	regLM	85	0.271251	7.51996	0.519052	0.0450537	7.51989	1.50077
gen_229	CCTAGAGACTCTGGGCACCACTGATAAGGGTGGGTACCAGGAACTCCACCCTTTACCGAGAAAGGCAGGCTGGTTTATCGCCACTCAGACCCAGCCAGCGACCACCCTGGGGAGTGTGTCAGCCACCAGGAGCATCGCTGTTGGGGAAATGTTATTAACTAGGAAGGAACTTTACAGAATGTTCCACACAAATGTCACAT	030	regLM	0	-0.487874	5.77625	-0.305965	-0.092168	5.77618	0.770906
gen_230	ATTAGCATGGAATTTGGACTTTGGAGCCATAATCCTGTTGTCTTCTTTCATTTAAAGAATATGGGCCGGGCGCGGTGGCTCACGCCTGTAATCCCAGCACTTTGGGAGGCCGAGGCGGGTGGATCACGAGGTCAGGAGATCGAGACCATCCTGGCTAACACAGTGAAACCCTGTCTCTACTAAAAATACAAAAAAATTAG	030	regLM	57	0.354679	3.4657	1.99388	1.25149	3.46548	2.32407
gen_231	GTTTAGCGTAAGAATCAGGGTCCAGCTGGTGCTCCCTAAACAGCAGCTGCTGTTCACTGTTGAAAGGCGCTCTGGAAGGCCAGGTGCGGTGGCTCATGCTTGTAATCCCAGCACTGTGGGAGGCCGAGGTGGGCGGATCACGAGGTCAGGAGATCGAGACCATCCTGGCCAAAATGGTGAAACCCCGTCTCTACTAAAAA	030	regLM	65	0.293585	1.98507	2.31018	0.82488	1.98507	1.27915
gen_232	CCTCAGAATTAATGGAGAGGGCCAGTGGCGGCCTGTGCCCTTTGTCCCACTGGCCGGCCTGGGGGTGGCGGCTCCAGAATACAGGGTCCTATTGTGTGCCCTGATGTCAGGCAGCTGGACTGCTGGGAGTGAGGATAAACAAGCAGCTGGAGCATCTCGCCTGAAGCCCCAGGAGAGGGCCAGAGCCCCTCCCCCAGCCT	030	regLM	98	3.43238	0.923789	2.27341	2.84825	0.923791	1.66082
gen_233	ATTAGCATGGAATTTGGACTTTGGAGCCATAATCCTGTTGTCTTCTTTCATTTAAAGAATATGGGCCAGGCGCGGTGGCTCACGCCTGTAATCCCAGCACTTTGGGAGGCCGAGGCGGGTGGATCATGAGGTCAGGAGATCGAGACCATCCTGGCTAACACAGTGAAACCCTGTCTCTACTAAAAATACAAAAAAATTAG	030	regLM	58	0.203358	3.24023	1.56057	0.999113	3.24027	1.65443
gen_234	TCTCTGCTCCCCGGAGTCCCTGCACGTGGCTTGACAGTGGCCTTGGTAGGACCCACTGGGGTGTTTCTTCGTCGCCCATGGGCCCTCATGCTGTTATCAGTTGGAAATGAATCAGAGATTAGGAAGCGGGGGGAGTGGTGGGGGTGTTATCGCCCAGTGCACACAGGTTACCACAGAGGTCACACGGTAGGTGAGCTACA	030	regLM	22	0.975021	4.50109	-1.06635	0.996507	4.50119	-0.61076
gen_235	CCTGAGAAAGGCTTCAACTAAAGAGCTATGGACAGGGACACTCTGTCACTTCCTGGGATTTTGACCCCCAGCTGTCCAACAGAGGAGGGTCTGTGCCTTTGCTCATTAGCCTAACTTAGATGATAGGTGACAAACTGAAGTGAGCTATAGGGAGTTGTCCACTTCCAGGCTGTTATCCATCCAGCTTGACCTCTGTGTCC	030	regLM	13	0.0341607	0.496906	-0.72394	-0.141443	0.496927	-0.86114
gen_236	CCAGTAATGGGATGGCTGGGTCCAATGGTATTTCTAGTTCTAGATCCCTGAGGAATCGCCACACTGACTTCCACAATGGTTGAACTAGTTTACAGTCCCGCCAACAGTGTAAAATTATTCCTATTTCTCCACATCCTCTCCAGCACCTGTTGTTTCCTGCCTTTTTAATGATCGCCATTCTAACTGGTGTGAGATGGTAT	030	regLM	3	-0.518973	0.641445	-0.539256	-0.0507692	0.641585	-0.382359
gen_237	TCTCTGCTCCCCAGAGTCCCTGCACGTGGCTTGACAGTGGCCTTGGTAGGACCCACTGGGGTGTTTCTTCGTCGCCCATGGGCCCTCATGCTGTTATCAGTTGGAAATGAATCAGAGATTAGGAAGCGGGGGGAGTGGTGGGGGTGTTATCGCCCAGTGCACACAGGTTACCACAGACATTTAGCCCTCACTGGAGCTGG	030	regLM	20	0.925625	5.19378	-0.422261	0.492918	5.19384	-0.103415
gen_238	ACTGGGATTGCTTGGTTGAATGGTAGTTCCATTTTTAGTTCTTTGAGAAATCTCCAAACTGCTTTCCACAGCAGCTTAACTAATTTACATTCCCACCAGCACTGTCTTAAGTGTTTCCTTTTCTCCGCAGCCTTGCCAACATCTGTAATTTTTTGACTTTTTAATAATAGCCATTCTAACTGGTGTGAGATGGTATCTCA	030	regLM	47	-0.0344677	0.871035	0.755053	0.271977	0.870964	0.0193443
gen_239	ACTTGGGAGGCTGAGACAGAAGAATGGCATGAACCTGGGAGACTGAGACAGGAGAATGGCATGAACCTGGGAGACGGAGGTTGCAGTGAGCCGAGATCACGCCACTGCACTCCAGCCTGGGCGAGAGAGAGAGAGAGAGAGAGAGAGAGAGAGAGAGAGAGAGAGAGAGAGAGAGAGAGAGAGAGAGAGAGAGAGAGAGA	030	regLM	88	0.428449	2.60204	2.57838	0.344353	2.6021	0.85298
gen_240	ATTAGCATGGAATTTGGACTTTGGAGCCATAATCCTGTTGTCTTCTTTCATTTAAAGAATATGGGCCGGGCGCGGTGGCTCACGCCTGTAATCCCAGCACTTTGGGAGGCCGAGGCGGGTGGATCATGAGGTCAGGAGATCGAGACCATCCTGGCTAACACGGTGAAAGCCTGTCTCTACTAAAAATACAAAAAAATAGG	030	regLM	57	0.338599	2.98689	1.29779	1.23701	2.98689	1.76991
gen_241	CTCAGAATTAATGGAGAGGGCCAGTGGCGGCCTGTGCCCTTTGTCCCACTGGCCGGCCTGGGGGTGGCGGCTCCAGAATACAGGGTCCTATTGTGTGCCCTGATGTCAGGCAGCTGGACTGCTGGGAGTGAGGATAAACAAGCAGCTGGAGCATCTCGCCTGAAGCCCCAGGAGAGGGCCAGAGCCCCTGCAGCAGCCAG	030	regLM	96	2.86754	0.0558633	1.43522	2.2611	0.0558304	1.26477
gen_242	ACTGGGATTGCTTGGTTGAATGGTAGTTCCATTTTTAGTTCTTTGAGAAATCTCCAAACTGCTTTCCACAGCAGCTTAACTAATTTACATTCCCACCAGCACTGTCTTAAGTGTTTCCTTTTCTCCGCAGCCTTGCCAACATCTGTAATTTTTTGACTTTTTAATGATATTCTTTATGACTGGTGTAAGATGGTATCTCA	030	regLM	51	-0.012626	0.7433	0.524565	0.238351	0.743366	0.314483
gen_243	TCTCTGCTCCCCAGAGTCCCTGCACGTGGCTTGACAGTGGCCTTGGTAGGACCCACTGGGGTGTTTCTTCGTCGCCCATGGGCCCTCATGCTGTTATCAGTTGGAAATGAATCAGAGATTAGGAAGCGGGGGGAGTGGTGGGGGTGGTATTGCGCCCTGGAGCAGGACTGGAGCCTGCTGGACACCAGCCCTGCGGGATC	030	regLM	26	1.01445	2.3848	-0.0538958	0.397711	2.38466	0.274288
gen_244	GTTTAGCGTAAGAATCAGGGTCCAGCTGGTGCTCCCTAAACAGCAGCTGCTGTTCACTGTTGAAAGGCGCTCTGGAAGGCCAGGTGCGGTGGCTCATGCTTGTAATCCCAGCACTGTGGGAGGCCGAGGTGGGCGGATCACCTGAGGTAAGGAGTTCGAGACCAGCTTGACCAACGTGGAGAAACCCCATCTCTCCTAAA	030	regLM	63	0.0916267	2.49779	3.0601	0.221631	2.4979	0.428192
gen_245	ATATTGGTACAGCACATTTGTCGCTATTAATAAACCAGTATCCAGGGCCAGGTGCAGTGGCTCACGCCTGTAATCCCAGCACTTTGGGAGGCCAAGGCAGGTGGATCACCTGAGGTCAGGAGTTCGAGACCAGCCTGACCAACATGGGAAAACCCTGTCTCTACTAAAAATACAAAATTAGCTGGGCTTGGTGGTGCATG	030	regLM	49	-0.296579	3.01714	3.43425	-0.0934533	3.01685	0.62855
gen_246	TCTCTGCTCCCCAGAGTCCCTGCACGTGGCTTGACAGTGGCCTTGGTAGGACCCACTGGGGTGTTTCTTCGTCGCCCATGGGCCCTCATGCTGTTATCAGTTGGAAATGAATCAGAGATTAGGAAGCGGGGGGAGTGGTGGGGGTGTTATCGCCCAGTGCACACAGGTTACCACAGACATTTATCACTCACCGGGGACAC	030	regLM	22	0.612565	5.62614	-0.458679	0.479928	5.62607	-0.297987
gen_247	ACTGGGATTGCTTGGTTGAATGGTAGTTCCATTTTTAGTTCTTTGAGAAATCTCCAAACTGCTTTCCACAGCAGCTTAACTAATTTACATTCCCACCAGCACTGTCTTAAGTGTTTCCTTTTCTCCGCAGCCTTGCCAACATCTGTAACTTTTTGACTTTTTAATGATATTCTTTATGACTGGTGCAAGATGGTATCTCA	030	regLM	53	0.135099	0.966379	0.612519	0.316184	0.966274	0.50421
gen_248	ACTGGGATTGCTTGGTTGAATGGTAGTTCCATTTTTAGTTCTTTGAGAAATCTCCAAACTGCTTTCCACAGCAGCTTAACTAATTTACATTCCCACCAACAGTGTAAAAGTGTTCCTATTTCTCCACATCCTCTCCAGCACCTGTTGTTTCCTGACTTTTTAATGATCACTATTCTAACTGGTGTGAGATGGTATCTCAT	030	regLM	28	-0.538674	0.899204	-0.331853	-0.145843	0.899195	-0.418798
gen_249	GTTTAGCGTAAGAATCAGGGTCCAGCTGGTGCTCCCTAAACAGCAGCTGCTGTTCACTGTTGAAAGGCGCTCTGGAAGGCCAGGTGCGGTGGCTCATGCTTGTAATCCCAGCACTGTGGGAGGCCGAGGTGGGCGGATCACCTGAGGTAAGGAGTTCGAGACCAGCCTGACTAACGTGGAGAAACCCCATCTCTCCTAAA	030	regLM	63	0.184405	2.67501	3.08899	0.396344	2.67474	0.571859
gen_250	CCAGTAATGGGATGGCTGGGTCCAATGGTATTTCTAGTTCTAGATCCCTGAGGAATTGCCACACTGACTTCCACAATGGTTGAACTAGTTTACAGTCCCGCCAACAGTGTATAAGTGTTCCTATTTCTCCACATCCTCTCCAGCACCTGTTGTTTCCTGACTTTTTAATGATCGCCATTCTAACTGGTGTGAGATGGTAT	030	regLM	8	-0.444329	0.90193	-0.506691	-0.0598073	0.902063	-0.553542
gen_251	ATTAGCATGGAATTTGGACTTTGGAGCCATAATCCTGTTGTCTTCTTTCATTTAAAGAATATGGGCCGGGCGCGGTGGCTCACGCCTGTAATCCCAGCACTTTGGGAGGCCGAGGCAGGTGGATCACGAGGTCAGGAGATCGAGACCATCCTGGCTAACACAGTGAAACCCTGTCTCTACTAAAAATACAAAAAAATTAG	030	regLM	58	0.141698	3.22555	1.71924	0.912195	3.22554	2.18943
gen_252	GATGGGTGCCTCTCCATGGAGCTCACATGTCATACTGCGCCCTGACTCATCACATGTCATTGTTCCTTTGTATTAATTTTCTGTCATCTACAGTGAGTTCCTTGAGGGCAGGGAAAGGGCTTTTTATCTCTGCATTACCAGAGCCCAACAGATACACACTGGTTCTTATTAGTCTAAATTTACAAAAGAACTTTTAAAAA	030	regLM	18	-0.111758	5.10672	0.0509319	0.287875	5.10664	0.22844
gen_253	TCTCTGCTCCCCAGAGTCCCTGCACGTGGCTTGACAGTGGCCTTGGTAGGACCCACTGGGGTGTTTCTTCGTCGCCCATGGGCCCTCATGCTGTTATCAATTGGAAATGAATCAGAGATTAGGAAGCGGGGGGAGTGGTGGGGGTGTTATCGCCCAGTGCACACAGGTTACCACAGAGGTCACACGGTAGGTGAGCTCCA	030	regLM	21	0.330849	2.85862	-1.23402	0.270423	2.85868	-0.666074
gen_254	TCATTTGAAGATGGAGGCAGAGATTGGAGTGATACAACTATAAGTCAGGGAATGCCAAGGACTTGAGGTCATGTGTTACAGAAGCCCTAGGAAATGAGTCAATTTCCTGGCACAGCACTAAGACATGCTGGTATTCTTCATTCCATCCCTTTCCCCTATTCCTAAATGTGCTCCAGGAACATTTGGACATTTTTCCTTTG	030	regLM	96	0.544055	-0.205254	5.53181	3.02757	-0.205364	5.96351
gen_255	CCAGTAATGGGATGGCTGGGTCCAATGGTATTTCTAGTTCTAGATCCCTGAGGAATTGCCACACTGACTTCCACAATGGTTGAACTAGTTTACAGTCCCGCCAACAGTGTATAAGTGTTCCCATTTCTCCACATCCTCTCCAGCACCTGTTGTTTCCTGACTTTTTAATGATCGCCATTCTAACTGGTGTGAGATGGTAT	030	regLM	9	-0.492995	0.714591	-0.546793	-0.0449882	0.714906	-0.50731
gen_256	CATGTTGCCTATGGTATTATAAGAATTGAAAGAAGGCCAGGCGCAGTGGCTCACACCTGTAATCCCAGCACTTTGGGAGGCTGAGGCAGGCAGATCACTTGAGGTCAGCAGTTCGAGACCAGCCTGGCCAACATGGTGAAACCCCATCTCTACTAAAAATACAAAAATTAGCCAGGCATGGTGGTGCACACCTGTAATCC	030	regLM	44	-0.235968	3.39068	3.29836	-0.0862209	3.39063	0.403195
gen_257	CCTGAGAAAGGCTTCAACTAAAGAGCTATGGACAGGGACACTCTGTCACTTCCTGGGATTTTGACCCCCAGCTGTCCAACAGAGGAGGGTCTGTGCCTTCGCTCATTAGCCTAACTTAGATGATAGGTGACAAACTGAAGTGAGCTATAGGGAGTTGTCCACTTCCAGGCTGCTATCACTACAGCCCATCTGGAAGCAGA	030	regLM	11	-0.0303876	4.37272	-0.704814	-0.178613	4.37262	-0.711994
gen_258	GATTTTTCTACTGCTAGGTTTTCCTTTTGGGGTTACGATTATTACAGGTGGCAATCAGTTAACTTAGTGGTTCTGTAGGCACCGCCCTATCTTCCAACTCACTTACATTTAAAAATTCACACAGAGAGGCTAGTGGGAAGCGGGTAGGTGTAAACAATGTGCTACAGTGAGTCACACCCGTCACAAAAGCCAATAATCCC	030	regLM	101	2.48354	3.53447	0.206125	2.33841	3.53446	0.773971
gen_259	TCTCTGCTCCCCAGAGTCCCTGCACGTGGCTTGACAGTGGCCTTGGTAGGACCCACTGGGGTGTTTCTTCGTCGCCCATGGGCCCTCATGCTGTTATCAATTGGAAATGAATCAGAGATTAGGAAGCGGGGGGAGTGGTGGGGGTGTTATCGCCCAGTGCACACAGGTTACCACAGAGGTCACACGGTAGGTGAGCTACA	030	regLM	21	0.368117	3.1059	-1.22224	0.321626	3.10597	-0.67514
gen_260	CCAGTAATGGGATGGCTGGGTCCAATGGTATTTCTAGTTCTAGATCCCTGAGGAATCGCCACACTGACTTCCACAATGGTTGAACTAGTTTACAGTCCCACCAACAGTGTAAAATTATTCCTATTTCTCCACATCCTCTCCAGCACCTGTTGTTTCCTGACTTTTTAATGATCACCATTCTAACTGGTGTGAGATGGTAT	030	regLM	3	-0.613612	-0.0187757	-0.508475	-0.225715	-0.018799	-0.561718
gen_261	CCAGTAATGGGATGGCTGGGTCCAATGGTATTTCTAGTTCTAGATCCCTGAGGAATTGCCACACTGACTTCCACAATGGTTGAACTAGTTTACAGTCCCGCCAACAGTGTAAAATTGTTCCTATTTCTCCACATCCTCTCCAGCACCTGTTGTTTCCTGACTTTTTAATGATTGCCATTCTAACTGGTGTGAGATGGTAT	030	regLM	7	-0.529772	0.158948	-0.523387	-0.14225	0.158963	-0.56894
gen_262	ACTGGGATTGCTTGGTTGAATGGTAGTTCCATTTTTAGTTCTTTGAGAAATCTCCAAACTGCTTTCCACAGCAGCTTAACTAATTTACATTCCCACCAGCACTGTCTTAAGTGTTTCCTTTTCTCCGCAGCCTTGCCAACATCTGTAATTTTTTGACTTTTTAATGATATTCTTTATGACTGGTGCAAGATGGTATCTCG	030	regLM	53	0.0619985	0.813784	0.62472	0.29002	0.813785	0.318774
gen_263	CCAGTAATGGGATGGCTGGGTCCAATGGTATTTCTAGTTCTAGATCCCTGAGGAATCGCCACACTGACTTCCACAATGGTTGAACTAGTTTACAGTCCCACCAACAGTGTAAAATTATTCCTATTTCTCCACATCCTCTCCAGCACCTGTTGTTTCCTGCCTTTTTAATGATCGCCATTCTAACTGGTGTGAGATGGTAT	030	regLM	3	-0.545528	0.434415	-0.486038	-0.0788462	0.434378	-0.441251
gen_264	CCTCAGAATTAATGGAGAGGGCCAGTGGCGGCCTGTGCCCTTTGTCCCACTGGCCGGCCTGGGGGTGGCGGCTCCAGAATACAGGGTCCTATCGTGTGCCCTGATGTCAGGCAGCTGGACTGCTGGGAGTGAGGATAAACAAGCAGCTGGAGCATCTCGCCTGAAGCCCCAGGAGAGGGCCAGAGCCCCTGCAGCAGCAG	030	regLM	96	1.01811	0.261577	0.993135	1.4583	0.261575	0.642039
gen_265	CCTGAGAAAGGCTTCAACTAAAGAGCTATGGACAGGGACACTCTGTCACTTCCTGGGATTTTGACCCCCAGCTGTCCAACAGAGGAGGGTCTGTGCCTTTGCTCATTAGCCTAACTTAGATGATAGGTGACAAACTGAAATGAGCTATAGGGAGTTGTCCACTTCCAGGCTGCTATCAGTGTGACAGAGGTTATAAATAC	030	regLM	14	-0.0345014	1.92426	-0.748008	-0.154681	1.92418	-0.733764
gen_266	ACTGGGATTGCTTGGTTGAATGGTAGTTCCATTTTTAGTTCTTTGAGAAATCTCCAAACTGCTTTCCACAGCAGCTTAACTAATTTACATTCCCACCAGCACTGTCTTAAGTGTTTCCTTTTCTCCGCAGCCTTGCCAACATCTGTAATTTTTTGACTTTTGAATAATAGCCATTCTAACTGGTGTGAGATGGTATCTCA	030	regLM	48	0.00954856	0.982519	0.638929	0.269659	0.982482	0.0157798
gen_267	CTCAGAATTAATGGAGAGGGCCAGTGGCGGCCTGTGCCCTTTGTCCCACCGGCCGGCCTGGGGGTGGCGGCTCCAGAATACAGGGTCCTATTGTGTGCACTGATGTCAGGCAGCTGGACTGCTGGGAGTGAGGATAAACAAGCAGCTGGAGCATCTCGCCTGAAGCCCCAGGAGAGGGCCAGAGCCCCTGCAGCAGCAGG	030	regLM	96	2.76538	0.028938	1.31211	1.98939	0.0287213	1.16333
gen_268	CTAGCTGTACCAGCCGCTGCCCCGGACCTGCTGCCCTGCCCCACGCACCCCCCCTCCCCTGGCCAGCCTCCCCAGAGGCCAGAAGGCGCCTTATCGGGCAGGGTTAAGGAGGGGGACAGTTATCAGGGGCTGCAGCCTAGATTGGGCCACAATGTCCTCGTCTCTTGAGGGTGGCAGGCTGTGCAGGCTCCCTGATAAAA	030	regLM	8	0.25974	5.07152	0.477445	0.363909	5.07156	0.553937
gen_269	TCTCTGCTCCCCGGAGTCCCTGCACGTGGCTTGACAGTGGCCTTGGTAGGACCCACTGGGGTGTTTCTTCGTCGCCCATGGGCCCTCATGCTGTTATCAGTTGGAAATGAATCAGAGATTAGGAAGCGGGGGGAGTGGTGGGGGTGTTATCGCCCAGTGCACACAGGTTACCACAGACATTTATCACTCACCGGGGACGC	030	regLM	21	0.634583	5.58749	-0.369614	0.482066	5.58748	-0.281557
gen_270	CATTCCATTCCATTCCATTCTGCATTCTGTTCCATTCTCCATTCCATTCCATTCTCCATACCATCCTCCATTCCATTACACTGCATTCCATTCTCCATTATATTTTATTCACCACGGCATTCCATTACATTTTCCATTCCATTCTCCATTCCATTCCATTCTCCATTCCATTCCATTCTCCATTCCATTCCCCTTTCCAT	030	regLM	91	-0.774406	-0.311776	3.74328	-0.314677	-0.311788	-0.640043
gen_271	TCTCTGCTCCCCGGAGTCCCTGCACGTGGCTTGACAGTGGCCTTGGTAGGACCCACTGGGGTGTTTCTTCGTCGCCCATGGGCCCTCATGCTGTTATCAATTGGAAATGAATCAGAGATTAGGAAGCGGGGGGAGTGGTGGGGGTGTTATCGCCCAGTGCACACAGGTTACCACAGACATTTAGCCCTCACTGCAGGGCC	030	regLM	21	0.252999	4.53485	-0.519765	0.0584865	4.53484	-0.256806
gen_272	GTTTAGCGTAAGAATCAGGGTCCAGCTGGTGCTCCCTAAACAGCAGCTGCTGTTCACTGTTGAAAGGCGCTCTGGAAGGCCAGGTGCGGTGGCTCATGCTTGTAATCCCAGCACTGTGGGAGGCCGAGGTGGGCGGATCACCTGAGGTAAGGAGTTCAAGACCAGCCTGACCAACGTGGAGAAACCCCATCTCTACTAAA	030	regLM	61	0.134506	2.1439	2.7547	0.393346	2.14394	0.596193
gen_273	CTCAGAATTAATGGAGAGGGCCAGTGGCGGCCTGTGCCCTTTGTCCCACTGGCCGGCCTGGGGGTGGCGGCTCCAGAATACAGGGTCCTATTGTGTGCCCTGATGTCAGGCAGCTGGACTGCTGGGAGTGAGGATAAACAAGCAGCTGGAGCATCTCGCCTGAAGCCCCAGGAGAGGGCCAGAGCCCCTGCAGCAGCAGC	030	regLM	96	2.91256	0.059221	1.38049	2.23481	0.0592384	1.24562
gen_274	ATTATGATACAGTCCAAGTATGTAACTTTCTGGGGACCAGACTTTGCTGAGAGTCATAATGGAGAGTCAAAGAGTCTGATGGCTGAGAGGGATGTGCCTGGGCTTGCCTTCATAAATGTTCATTGTCTCAGCCAAGGTTTTGGCAGGAGCGAGAGCAGGCTCAGATCAGTGTCACAGGGAGTATGTCACAGGGCTTACAG	030	regLM	94	2.30568	0.24708	6.24169	2.53276	0.247062	4.30725
gen_275	GTTTAGCGTAAGAATCAGGGTCCAGCTGGTGCTCCCTAAACAGCAGCTGCTGTTCACTGTTGAAAGGCGCTCTGGAAGGCCAGGCGCGGTGGCTCATGCCTGTAATCCCAGCACTGTGGGAGGCCGAGGTGGGCGGATCACCTGAGGTAGGGAGTTCGAGACCAGCCTGACCAACGTGGAGAAACCCCATCTCTCCTAAA	030	regLM	63	0.293103	3.03341	3.91975	0.604987	3.03346	1.85272
gen_276	GTTTAGCGTAAGAATCAGGGTCCAGCTGGTGCTCCCTAAACAGCAGCTGCTGTTCACTGTTGAAAGGCGCTCTGGAAGGCCAGGTGCGGTGGCTCATGCTTGTAATCCCAGCACTGTGGGAGGCCGAGGTGGGCGAATCACCTGAGGTAAGGAGTTCGAGACCAGCCTGACCAACGTGGAGAAACCCCATCTCTCCTAAA	030	regLM	63	-0.019704	2.25813	3.61209	0.0317394	2.25819	0.426426
gen_277	GTTTAGCGTAAGAATCAGGGTCCAGCTGGTGCTCCCTAAACAGCAGCTGCTGTTCACTGTTGAAAGGCGCTCTGGAAGGCCAGGCGCGGTGGCTCATGCTTGTAATCCCAGCACTGTGGGAGGCCGAGGTGGGCGAATCACCTGAGGTAAGGAGTTCGAGACCAGCCTGACCAACGTGGAGAAACCCCATCTCTCCTAAA	030	regLM	64	0.0798812	2.79771	4.34903	0.292038	2.79767	1.48854
gen_278	ACTGGGATTGCTTGGTTGAATGGTAGTTCCATTTTTAGTTCTTTGAGAAATCTCCAAACTGCTTTCCACAGCAGCTTAACTAATTTACATTCCCACCAGCACTGTCTTAAGTGTTTCCTTTTCTCCGCAGCCTTGCCAACATCTGTAATTTTTTGACTTTTTGATGATGGCCATTCTAACTGGTGTGAGATGGTATCTCA	030	regLM	47	-0.081742	0.819548	0.430771	0.34628	0.819658	-0.0310572
gen_279	TCTCTGCTCCCCAGAGTCCCTGCACGTGGCTTGACAGTGGCCTTGGTAGGACCCACTGGGGTGTTTCTTCGTCGCCCATGGGCCCTCATGCTGTTATCAGTTGGAAATGAATCAGAGATTAGGAAGCGGGGGGAGTGGTGGGGGTGTTATCGCCCAGTGCACACGGGGCTCTCAGCTAATCTCTGGCGGCCCTGGGTGAC	030	regLM	4	0.719378	5.82786	-0.231343	0.923702	5.82781	0.103696
gen_280	GAAAGGATACTCTGGCTGTCATGTGGACTGGAGGGAGCTGGAATTGAGGCAGTGAGCCCAGCTACCAGAGTCTTGAAATAGTTTAGTGTAAGATGCTGAATCATGAGTTGGGGCAGAGAGGATAACAAAGTAGGGAAGTGGGGGTAGAGACAGTCGTAAGACCTGAGGAGGAAATGGCTAAGTGAGGGTTGAAGGAGGAA	030	regLM	93	0.556914	3.31898	1.26375	0.578948	3.31893	1.6122
gen_281	CCTGAGAAAGGCTTCAACTAAAGAGCTATGGACAGGGACACTCTGTCACTTCCTGGGATTTTGACCCCCAGCTGTCCAACAGAGGAGGGTCTGTGCCTTTGCTCATTAGCCTAACTTAGATGATAGGTGACAAACTGAAGTGAGCTATGGGGAGAGGTACCTCATGTCCAGCTGAGGGATGCAAAGCACCTGGGGAAACC	030	regLM	24	-0.417585	-0.325296	-0.72508	-0.234622	-0.325269	-0.998922
gen_282	ACTGGGATTGCTTGGTTGAATGGTAGTTCCATTTTTAGTTCTTTGAGAAATCTCCAAACTGCTTTCCACAGCAGCTTAACTAATTTACATTCCCACCAGCACTGTCTTAAGTGTTTCCTTTTCTCCGCAGCCTTGCCAACATCTGTAATTTTTTGACTTTTTAATGATATTCTTTATGACTGGTGCAAGATGGCATCCCA	030	regLM	54	0.16488	0.315088	0.766924	0.376936	0.315049	0.593748
gen_283	TATGTGGTCTCATATTTTGTTGCAGTGTCACCTCAAAATAATCAGAATTTTCACATTTAAAGATTTTTTTTCTAATCAGGAAGTGGGAATTAGTAGAGCTTCTTTGCTTTGTCTTCACCTTCTCTGACAGAAAACTTCCTCTGTGGTCACGACATTTCAAAGTAAAACCCTTCCTGTACCCAAGAGATAAGAAACTTTTA	030	regLM	97	0.852197	4.57893	0.281815	0.888243	4.57863	0.950057
gen_284	GTTTAGCGTAAGAATCAGGGTCCAGCTGGTGCTCCCTAAACAGCAGCTGCTGTTCACTGTTGAAAGGCGCTCTGGAAGGCCAGGCGCGGTGGCTCATGCTTGTAATCCCAGCACTGTGGGAGGCCGAGGTGGGCAGATCACCTGAGGTAAGGAGTTCGAGACCAGCCTGACCAACGTGGAGAAACCCCATCTCTCCTAAA	030	regLM	64	0.0534928	2.69752	3.70332	0.251856	2.69737	1.66807
gen_285	GTTTAGCGTAAGAATCAGGGTCCAGCTGGTGCTCCCTAAACAGCAGCTGCTGTTCACTGTTGAAAGGCGCTCTGGAAGGCCAGGCGCGGTGGCTCATGCTTGTAATCCCAGCACTGTGGGAGGCCGAGGCAGGTGGATCACCTGAGGTAAGGAGTTCGAGACCAGCCTGACCAACGTGGAGAAACCCCATCTCTCCTAAA	030	regLM	64	-0.0692484	2.54953	2.89207	0.0804624	2.54977	1.13135
gen_286	AACCAGAAAAAAACAAACAACCCCATCAACAAGTGGGCGAAGGATATGAACAGACACTTCTCAAAAGAAGATATTTATTCAACCAAAAGACACATGAAAAAATGCTCATCATCACTGGCCATCAGAGAAATGCAAATCAAAACCACAATGAGATACCATCTCACACCAGTTAGAATGGCGATCATTGAAAAGTCAGGAAG	030	regLM	39	-0.448802	0.949389	0.164799	-0.208762	0.949495	-0.315571
gen_287	TCTCTGCTCCCCAGAGTCCCTGCACGTGGCTTGACAGTGGCCTTGGTAGGACCCACTGGGGTGTTTCTTCGTCGCCCATGGGCCCTCATGCTGTTATCAATTGGAAATGAATCAGAGATTAGGAAGCGGGGGGAGTGGTGGGGGTGTTATCGCCCAGTGCACACGGGGCTCTCAGCTAATCTCTGGCGGCTCTGGAATAA	030	regLM	5	-0.00765132	5.20879	-0.216034	0.10913	5.2088	0.00242478
gen_288	ATTATGATACAGTCCAAGTATGTAACTTTCTGGGGACCAGACTTTGCTGAGAGTCATAATGGAGAGTCAAAGAGTCTGATGGCTGAGAGGGATGTGCCTAGGCTTGCCTTCATAAATGTTCATTGTCTCAGCCAAGGTTTTGGCAGGAGCGAGAGCAGGCTCAGATCAGTGTCACAGGCAGTACCTTACGTGGCTTGAGG	030	regLM	95	1.55478	0.0171792	5.07137	1.2269	0.0171571	1.90261
gen_289	ACTGGGATTGCTTGGTTGAATGGTAGTTCCATTTTTAGTTCTTTGAGAAATCTCCAAACTGCTTTCCACAGCAGCTTAACTAATTTACATTCCCACCAGCACTGTCTTAAGTGTTTCCTTTTCTCCGCAGCCTTGCCAACATCTGTAATTTTTTGACTTTTTAATGATATTCTTTATGACTGGTGCAAGATGGTATCTCT	030	regLM	52	0.051684	0.782096	0.602768	0.27525	0.781954	0.235347
gen_290	GTTTAGCGTAAGAATCAGGGTCCAGCTGGTGCTCCCTAAACAGCAGCTGCTGTTCACTGTTGAAAGGCGCTCTGGAAGGCCAGGTGCGGTGGCTCATGCTTGTAATCCCAGCACTGTGGGAGGCCGAGATGGGTGGATCACCTGAGGTAAGGAGTTCGAGACCAGCCTGACCAACGTGGAGAAACCCCATCTCTCCTAAA	030	regLM	62	-0.03011	2.25541	3.23325	0.0165404	2.2555	0.544165
gen_291	AGAATTGGAAGGAGCTTAGGGGAAAGCTAGCCTCAGGTCAGAATTGCCTGCATGCCACTCGGCTAGTGAGCTGCTGAATCACCTTATTCCTGGAGAAAGATTTTGTTTTTTATTTTATTTTATTTTATTTTATTTTATTTTATTTTATTTTATTTTATTTTATTTTACTTTATTATTATTATTATTATTATTATTATTAT	030	regLM	96	0.137092	0.320456	0.456756	0.129221	0.320514	0.589776
gen_292	GATGGGTGCCTCTCCATGGAGCTCACATGTCATACTGCGCCCTGACTCATCACATGTCATTGTTCCTTTGTATTAATTTTCTGTCATCTACAGTGAGTTCCTTGAGGGCAGGGAAAGGGCTTTTTATCTCTGCATTACCAGAGCCCAACAGATACACACTGGTTCTTATCCATCCACTCATTCATTCATTCATTCATTCT	030	regLM	9	0.0264864	5.00387	-0.257147	0.34728	5.00395	0.141471
gen_293	CCATCTGTTCCATCCTCACCCACCCAAGGAGCCGCCCCTGCTCCTAGAGACTCTGGGCACCACTGATAAGGGTGGGTACCAGGAACTCCACCCTTTACCGAGAAAGGCAGGCTGGTTTATCGCCACTCAGACCCAGCCAGCGACCACCCTGGGGAGTGTGTCAGCCACCAGGAGCATCGCTGTTGGGGAATGGGTTGGTG	030	regLM	84	-0.06252	7.27777	0.512702	-0.0334603	7.27773	1.20834
gen_294	GTTTAGCGTAAGAATCAGGGTCCAGCTGGTGCTCCCTAAACAGCAGCTGCTGTTCACTGTTGAAAGGCGCTCTGGAAGGCCAGGTGCGGTGGCTCATGCTTGTAATCCCAGCACTGTGGGAGGCCGAGGTGGGCGGATCACGAGGTCAGGAGATCGAGACCATCCTGGCTAAAATGGTGAAACCCCATCTCTACTAAAAA	030	regLM	66	0.277191	2.02377	2.16998	0.795497	2.02366	1.06018
gen_295	CCAGTAATGGGATGGCTGGGTCCAATGGTATTTCTAGTTCTAGATCCCTGAGGAATTGCCACACTGACTTCCACAATGGTTGAACTAGTTTACAGTCCCACCAACAGTGTAAAATTATTCCTATTTCTCCACATCCTCTCCAGCACCTGTTGTTTCCTGACTTTTTAATGATCACCATTCTAACTGGTGTGAGATGGTAT	030	regLM	4	-0.638907	-0.00279327	-0.489376	-0.243701	-0.00278737	-0.574063
gen_296	GTTTAGCGTAAGAATCAGGGTCCAGCTGGTGCTCCCTAAACAGCAGCTGCTGTTCACTGTTGAAAGGCGCTCTGGAAGGCCAGGTGCGGTGGCTCATGCTTGTAATCCCAGCATTTTGGGAGGCCGAGGTGGGTGGATCACCTGAGGTAAGGAGTTCGAGACCAGCCTGACCAACGTGGAGAAACCCCATCTCTCCTAAA	030	regLM	61	-0.156598	2.6141	2.93337	-0.0820356	2.6142	0.742202
gen_297	TCTCTGCTCCCCAGAGTCCCTGCACGTGGCTTGACAGTGGCCTTGGTAGGACCCACTGGGGTGTTTCTTCGTCGCCCATGGGCCCTCATGCTGTTATCAGTTGGAAATGAATCAGAGATTAGGAAGCGGGGGGAGTGGTGGGGGTGTTATCGCCCAGTGCACACAGGTTACCACAGGAGAAGGGGGTTGGGGAAGTTACA	030	regLM	23	1.25059	5.78613	-0.424014	0.914652	5.78617	-0.0142067
gen_298	CCCGAATACTGTGCTTTTCCGACGGGCTTAGGAAACGGCACACCAGGATATTATATCCTGCACCTGGCTCGGAGGGTCCTACGTGCACGGAGTCTCGCTGATTGCTAGCACAGAAGTCTGAGATCAAACTGCAAGGCGGCAGCGAGGCTGGGGGAGGGGTGCCCGCCATTGCCCAGGCTTGCTTAGGCTTGACTGGGCTT	030	regLM	96	1.05154	-0.115704	2.88689	1.83556	-0.115797	1.55
gen_299	ATTAGCATGGAATTTGGACTTTGGAGCCATAATCCTGTTGTCTTCTTTCATTTAAAGAATATGGGCCAGGCGCGGTGACTCACATCTCTAATCCCAGCGCTTTGGGAGGCCAAGGCGGGTAGATCACGTGAGGTCAGGAGTTTGAGAGGCCAGCCTGGCAACATGGCAAAACCCTGTCTCTACTAAAAATACAAAAATTA	030	regLM	65	3.98843	0.444123	2.18135	2.52681	0.444094	2.34629
gen_300	GATGGGTGCCTCTCCATGGAGCTCACATGTCATACTGCGCCCTGACTCATCACATGTCATTGTTCCTTTGTATTAATTTTCTGTCATCTACAGTGAGTTCCTTGAGGGCAGGGAAAGGGCTTTTTATCTCTGCATTACCAGAGCCCAACAGATACACACTGGTTCTTATTAGTCTAAATTTACAAAAGAACTTTTAACTC	030	regLM	17	-0.0733641	5.19902	0.00201553	0.29039	5.19902	0.254587
gen_301	CTCTCTATTACATTCCATTCTCCATTCCATTCCATTCTCCATTCCATTCCATTCTCCATTCCATTCCACTCCATTCTCCATTATATTTTCCATTCCATTCTCCATTACATTCCATTCTCCATTACATTCCATTCTCCATTACATTCCATTCTCCATTACATTCCATTCTCCATTACATTCCATTCTCCATTCCATTCCCC	030	regLM	88	-0.448824	-0.150782	4.46875	-0.0514025	-0.150797	1.17044
gen_302	ACTGGGATTGCTTGGTTGAATGGTAGTTCCATTTTTAGTTCTTTGAGAAATCTCCAAACTGCTTTCCACAGCAGCTTAACTAATTTACATTCCCACCAGCACTGTCTTAAGTGTTTCCTTTTCTCCGCAGCCTTGCCAACATCTGTAATTTTTTGGCTTTTTAATGATATTCTTTATGACTGGTGCAAGATGGTATCTCA	030	regLM	53	0.0286843	0.797868	0.586616	0.259621	0.797892	0.326901
gen_303	ATTAGCATGGAATTTGGACTTTGGAGCCATAATCCTGTTGTCTTCTTTCATTTAAAGAATATGGGCCAGGCGCGGTGGCTCACGCCTGTAATCCCAGCACTTTGGGAGGCCGAGGCGGGTAGATCACGAGGTCAGGAGATCGAGACCATCCTGGCTAACACAGTGAAACCCTGTCTCTACTAAAAATACAAAAAATTAGC	030	regLM	57	0.22842	3.11937	2.58966	1.06079	3.11983	2.39891
gen_304	AAACAAATTATGTAGAAGCCAAACCATTTTACTTCCCTCACTGTAGACCACACATAGCAACACAGTCTGTGTCTTTGTTCATGTTTTTAGAATTCCATCGACAGAGAGGAGAAAATACATCTGGGGAATTTGCCGCTGCTCTGAGTTCCAAAGTCCAAACCAATGTAATTGTTTCAGAATAACGGATGACACTTTTAGCT	030	regLM	99	2.55839	0.781347	0.374061	2.56339	0.781373	1.04847
gen_305	CCTGAGAAAGGCTTCAACTAAAGAGCTATGGACAGGGACACTCTGTCACTTCCTGGGATTTTGACCCCCAGCTGTCCAACAGAGGAGGGTCTGTGCCTTTGCTCATTAGCCTAACTTAGATGATAGGTGACAAACTGAAGTGAGCTATGGGGAGAGGTACCTCATTTATCTGTTGCTGGGTGTGTCACAGCAGGGGATGT	030	regLM	25	-0.116847	2.03575	-0.956251	-0.261825	2.03578	-0.935966
gen_306	CCTGAGAAAGGCTTCAACTAAAGAGCTATGGACAGGGACACTCTGTCACTTCCTGGGATTTTGACCCCCAGCTGTCCAACAGAGGAGGGTCTGTGCCTTCGCTCATTAGCCTAACTTAGATGATAGGTGACAAACTGAAATGAGCTATAGGGAGTTGTCCACTTCCAGGCTGCTATCACTGTCTCAGATGGGGCGTTGTT	030	regLM	10	0.0633808	1.89028	-0.38713	-0.138894	1.89044	-0.560626
gen_307	ATTAGCATGGAATTTGGACTTTGGAGCCATAATCCTGTTGTCTTCTTTCATTTAAAGAATATGGGCCGGGCGCGGTGGCTCACGCCTGTAATCCCAGCACTTTGGGAGGCCGAGGCGGGTGGATCATGAGGTCAGGAGATCGAGACCATCCTGGCTAACACGGTGAAAGCCTGTCTCTACTAAAAATACAAAAAATTAGC	030	regLM	57	0.266832	3.02622	1.50545	1.23402	3.0265	1.85889
gen_308	ATTATGATACAGTCCAAGTATGTAACTTTCTGGGGACCAGACTTTGCTGAGAGTCATAATGGAGAGTCAAAGAGTCTGATGGCTGAGAGGGATGTGCCTAGGCTTGCCTTCATAAATGTTCATTGTCTCAGCCAAGGTTTTGGCAGGAGCGAGAGCAGGCTCAGATCAGTGTCACAGGCAGTACCTTACATATGCTGAAA	030	regLM	96	1.33736	-0.0682854	5.09079	0.959562	-0.0682508	1.85303
gen_309	CTCTCTATTACATTCCATTCTCCATTCCATTCCATTCTCCATTCCATTCCATTCTCCATTCCATTCCACTCCATTCTCCATTCCATTCCATTCTCCATTACATTCCATTCTCCATTACATTCCATTCTCCATTACATTCCATTCTCCATTACATTCCATTCTCCATTACATTCCATTCTCCATTCCATTCCCCTTTCCAT	030	regLM	90	-0.467893	-0.162528	4.07723	-0.124934	-0.162561	0.705505
gen_310	TCCTGAATGGGCAAAAACTGGAAGCATTCCCTTTGAAAACTGGCACAAGACGGGGATGCCCTCTCTCACCGCTCTTATTCAACATAGTGTTGGAAGTTCTGGCCAGGGCAATCAGGCAGGAGAAATAAATAAAGGGTATTCAATTAGGAAAAGAGGAAGTCAAATTGTCCCTGTTTGCAGATGACATGACTGTATATTTA	030	regLM	22	-0.173197	0.32441	-0.486105	0.267177	0.324396	-0.140292
gen_311	CCAGTAATGGGATGGCTGGGTCCAATGGTATTTCTAGTTCTAGATCCCTGAGGAATTGCCACACTGACTTCCACAATGGTTGAACTAGTTTACAGTCCCACCAACAGTGTAAAAGTGTTCCTATTTCTCCACATCCTCTCCAGCACCTGTTGTTTCCTGACTTTTTAATGATCGCCATTCTAACTGGTGTGAGATGGTAT	030	regLM	7	-0.385744	-0.0242356	-0.32488	-0.140519	-0.0242107	-0.4465
gen_312	GTTTAGCGTAAGAATCAGGGTCCAGCTGGTGCTCCCTAAACAGCAGCTGCTGTTCACTGTTGAAAGGCGCTCTGGAAGGCCAGGTGCGGTGGCTCATGTCTGTAATCCCAGCACTGTGGGAGGCCGAGGTGGGCGGATCACCTGAGGTAAGGAGTTCGAGACCAGCCTGACCAACGTGGAGAAACCCCATCTCTCCTAAA	030	regLM	62	0.103147	2.50112	3.26824	0.249578	2.50113	1.02625
gen_313	TCTCTGCTCCCCGGAGTCCCTGCACGTGGCTTGACAGTGGCCTTGGTAGGACCCACTGGGGTGTTTCTTCGTCGCCCATGGGCCCTCATGCTGTTATCAATTGGAAATGAATCAGAGATTAGGAAGCGGGGGGAGTGGTGGGGGTGTTATCGCCCAGTGCACACAGGTTACCACAGACGTTTATCAGTTGATTGGATTTG	030	regLM	20	0.191966	4.69436	-0.833726	0.103906	4.69438	-0.555057
gen_314	CCAGTAATGGGATGGCTGGGTCCAATGGTATTTCTAGTTCTAGATCCCTGAGGAATTGCCACACTGACTTCCACAATGGTTGAACTAGTTTACAGTCCCACCAACAGTGTAAAATTGTTCCTATTTCTCCACATCCTCTCCAGCACCTGTTGTTTCCTGACTTTTTAATGATTGCCATTCTAACTGGTGTGAGATGGTAT	030	regLM	7	-0.529561	0.057332	-0.438927	-0.129173	0.0573506	-0.55286
gen_315	TCTCTGCTCCCCAGAGTCCCTGCACGTGGCTTGACAGTGGCCTTGGTAGGACCCACTGGGGTGTTTCTTCGTCGCCCATGGGCCCTCATGCTGTTATCAGTTGGAAATGAATCAGAGATTAGGAAGCGGGGGGAGTGGTGGGGGTGTTATCGCCCAGTGCACACAGGTTACCACAGACATTTAGCCCTCACTGCAGCGTG	030	regLM	22	0.922404	5.20911	-0.508522	0.554673	5.20911	-0.115044
gen_316	GTTTAGCGTAAGAATCAGGGTCCAGCTGGTGCTCCCTAAACAGCAGCTGCTGTTCACTGTTGAAAGGCGCTCTGGAAGGCCAGGCGCGGTGGCTCATGCTTGTAATCCCAGCACTGTGGGAGGCCGAGGTGGGCGGATCACCTGAGATAAGGAGTTCGAGACCAGCCTGACCAACGTGGAGAAACCCCATCTCTCCTAAA	030	regLM	62	0.365098	2.8467	2.58145	0.654588	2.84671	0.79167
gen_317	AGAATTGGAAGGAGCTTAGGGGAAAGCTAGCCTCAGGTCAGAATTGCCTGCATGCCACTCGGCTAGTGAGCTGCTGAATCACCTTATTCCTGGAAAATTATTATTATTATTATTATTATTATTATTATTATTATTATTATTATTATTATTATTATTATTATTATTATTATTATTATTATTATTATTATTATTATTATTAT	030	regLM	93	-0.0232243	0.192825	0.312794	0.110479	0.192793	0.298101
gen_318	ATATTGGTACAGCACATTTGTCGCTATTAATAAACCAGTATCCAGGGCCAGGTGCAGTGGCTCACGCCTGTAATCCCAGCACTTTGGGAGGCCGAGGTGGGTGGATCACCTGAGGTCAGGAGTTCGAGACCAGCCTGACCAACATGGGAAAACCCTGTCTCTACTAAAAATACAAAATTAGCTGGGCTTGGTGGTGCAGG	030	regLM	46	-0.185884	3.47891	3.83248	0.185369	3.479	1.42738
gen_319	CCAGTAATGGGATGGCTGGGTCCAATGGTATTTCTAGTTCTAGATCCCTGAGGAATTGCCACACTGACTTCCACAATGGTTGAACTAGTTTACAGTCCCGCCAACAGTGTAAAATTATTCCTATTTCTCCACATCCTCTCCAGCACCTGTTGTTTCCTGCCTTTTTTTGTCTCTACCTTGCCGTGGCAGAAGAACGACGC	030	regLM	24	-0.189233	0.310213	-0.323846	0.424352	0.31021	-0.0727417
gen_320	CCTGAGAAAGGCTTCAACTAAAGAGCTATGGACAGGGACACTCTGTCACTTCCTGGGATTTTGACCCCCAGCTGTCCAACAGAGGAGGGTCTGTGCCTTCGCTCATTAGCCTAACTTAGATGATAGGTGACAAACTGAAGTGAGCTATGGGGAGAGGTACCTCATTTATCTGTTGCTGGGTGTGTCACACCGGGGGATGT	030	regLM	26	-0.0307609	1.87902	-0.6181	-0.171368	1.87898	-0.772662
gen_321	CCAGTAATGGGATGGCTGGGTCCAATGGTATTTCTAGTTCTAGATCCCTGAGGAATTGCCACACTGACTTCCACAATGGTTGAACTAGTTTACAGTCCCACCAACAGTGTAAAATTATTCCTATTTCTCCACATCCTCTCCAGCACCTGTTGTTTCCTGCCTTTTTAATGATCACCATTCTAACTGGTGTGAGATGGTAT	030	regLM	3	-0.591048	0.0740697	-0.502771	-0.137078	0.0741121	-0.487695
gen_322	GATTTTTCTACTGCTAGGTTTTCCTTTTGGGGTTACGATTATTACAGGTGGCAATCAGTTAACTTAGTGGTTCTGTAGGCACCGCCCTATCTTCCAACTCACTTACATTTAAAAATTCACACAGAGAGGCTAGTGGGAAGCGGGTAGGTGTAAACAATGTGCTACAGTGAGGCTGGTGTATACATGTAATGGGCTCACAG	030	regLM	98	0.585172	1.46928	0.0633772	0.326973	1.46927	0.188251
gen_323	CCTGAGAAAGGCTTCAACTAAAGAGCTATGGACAGGGACACTCTGTCACTTCCTGGGATTTTGACCCCCAGCTGTCCAACAGAGGAGGGTCTGTGCCTTTGCTCATTAGCCTAACTTAGATGATAGGTGACAAACTGAAATGAGCTATAGGGAGTTGTCCACTTCCAGGCTGCTATCAGTGCATCTGGTACCCAGCTTTC	030	regLM	15	-0.260419	0.39822	-0.731556	-0.224988	0.398112	-0.736875
gen_324	GATGGGTGCCTCTCCATGGAGCTCACATGTCATACTGCGCCCTGACTCATCACATGTCATTGTTCCTTTGTATTAATTTTCTGTCATCTACAGTGAGTTCCTTGAGGGCAGGGAAAGGGCTTTTTATCTCTGCATTACCAGAGCCCAACGGATACACACTGGTTCTTATCCATCCACCCATTCATCCAACAAACATTTAT	030	regLM	0	-0.521977	6.99579	-0.392688	0.0227453	6.99573	0.215883
gen_325	ATTAGCATGGAATTTGGACTTTGGAGCCATAATCCTGTTGTCTTCTTTCATTTAAAGAATATGGGCCGGGCGCGGTGGCTCACACCTGTAATCCCAGCACTTTGGGAGGCCGAGGCGGGTGGATCACGAGGTCAGGAGATCGAGACCATCCTGGCTAACACAGTGAAACCCTGTCTCTACTAAAAATACAAAAAAATTAG	030	regLM	58	0.127604	2.98054	1.0599	0.922225	2.98063	1.40964
gen_326	CATTCCATTCCATTCCATTCTGCATTCTGTTCCATTCTCCATTCCATTCCATTCTCCATACCATCCTCCATTCCATTACACTGCATTCCATTCTCCATTATATTTTATTCACCACGGCATTCCATTACATTTTCCATTCCATTCTATTCTCCATTCCATTCCATATTCTATTCCCCTTTCCATTCCATTCCATATTCTAT	030	regLM	91	-0.830112	-0.432319	3.37413	-0.373417	-0.432266	-0.897894
gen_327	CCTGAGAAAGGCTTCAACTAAAGAGCTATGGACAGGGACACTCTGTCACTTCCTGGGATTTTGACCCCCAGCTGTCCAACAGAGGAGGGTCTGTGCCTTCGCTCATTAGCCTAACTTAGATGATAGGTGACAAACTGAAGTGAGCTATGGGGAGAGGTACCTCATTTATCTGTTGCTGGGTGTTGCATTTACCCCTGTCA	030	regLM	27	-0.214198	0.402456	-0.52057	-0.207103	0.4026	-0.759881
gen_328	TCTCTGCTCCCCGGAGTCCCTGCACGTGGCTTGACAGTGGCCTTGGTAGGACCCACTGGGGTGTTTCTTCGTCGCCCATGGGCCCTCATGCTGTTATCAATTGGAAATGAATCAGAGATTAGGAAGCGGGGGGAGTGGTGGGGGTGTTATCGCCCAGTGCACACGGGGCTCTCAGCTAATCTCTGGCGGCCCTGGGTCCG	030	regLM	1	-0.0560021	5.33087	-0.222427	0.229517	5.33083	0.0319615
gen_329	ATAGCAAACCCTCCCCTCCCTTCCCCCAGACCCAGCCAACTGCAGTTCCAGGCTGCCTGGAGTGACACCTGCCCCTTTGCCCTCTTTCCAGGAGTAAATATTGGATCAGGTTCAGTCACCAGCTGTTTGACTAAGAGCAAAGTCAGTTGTGGGATCATGAATGGCTGGGATCCTAGGGAAGACATGCTGAGAAATATCAG	030	regLM	97	2.9388	0.251955	-0.47958	3.50363	0.251999	-0.37743
gen_330	CTCTCTATTACATTCCATTCTCCATTCCATTCCCATACATTCTCCACTCCACTGCATTCTCTATTCCATTCTCCATTCCATTCCACTCCATTCTCCATTCCATTCCATTCTCCATTCCATTCCATTCTCCATTACATTCCATTCTCCATTACATTCCATTCTCCATTACATTCCATTCTATTCTCCATTCCATTCCATTC	030	regLM	87	-0.657934	-0.2901	3.60943	-0.297227	-0.290068	-0.329189
gen_331	CCTGAGAAAGGCTTCAACTAAAGAGCTATGGACAGGGACACTCTGTCACTTCCTGGGATTTTGACCCCCAGCTGTCCAACAGAGGAGGGTCTGTGCCTTTGCTCATTAGCCTAACTTAGATGATAGGTGACAAACTGAAATGAGCTATAGGGAGTTGTCCACTTCCAGGCTGCTATCAGTGTGACAGAGGTTGGATTCCG	030	regLM	12	-0.0536615	1.16568	-0.689677	-0.164309	1.1657	-0.802273
gen_332	TCCTGAATGGGCAAAAACTGGAAGCATTCCCTTTGAAAACTGGCACAAGACGGGGATGCCCTCTCTCACCGCTCCTATTCAACATAGTGTTGGAAGTTCTGGCCAGGGCAATCAGGCAGGAGAAGGAAATAAAGGGTATTCAATTAGGAAAAGAGGAAGTCAAATTGTCCCTGTTTGCAGATGACATGATTGTATATCTA	030	regLM	17	-0.146149	0.0954568	-0.412754	0.344927	0.0953298	-0.122891
gen_333	TCTCTGCTCCCCAGAGTCCCTGCACGTGGCTTGACAGTGGCCTTGGTAGGACCCACTGGGGTGTTTCTTCGTCGCCCATGGGCCCTCATGCTGTTATCAATTGGAAATGAATCAGAGATTAGGAAGCGGGGGGAGTGGTGGGGGTGTTATCGCCCAGTGCACACAGGTTACCACAGACATTTAGCCCTCACTGCAGTTTC	030	regLM	20	0.193709	4.57403	-0.635994	0.0486484	4.57402	-0.265683
gen_334	CCAGTAATGGGATGGCTGGGTCCAATGGTATTTCTAGTTCTAGATCCCTGAGGAATCGCCACACTGACTTCCACAATGGTTGAACTAGTTTACAGTCCCACCAACAGTGTAAAATTATTCCTATTTCTCCACATCCTCTCCAGCACCTGTTGTTTCCTGCCTTTTTAATGATCACCATTCTAACTGGTGTGAGATGGTAT	030	regLM	2	-0.582743	0.132714	-0.528292	-0.163278	0.132774	-0.449092
gen_335	TCTCTGCTCCCCAGAGTCCCTGCACGTGGCTTGACAGTGGCCTTGGTAGGACCCACTGGGGTGTTTCTTCGTCGCCCATGGGCCCTCATGCTGTTATCAGTTGGAAATGAATCAGAGATTAGGAAGCGGGGGGAGTGGTGGGGGTGTTATCGCCCAGTGCACACAGGTTACCACAGGGCGCTTTCATGAGCATGTTTCTG	030	regLM	22	0.929159	4.98062	-0.664845	0.558381	4.98054	-0.292377
gen_336	CTGGCTGTTTCCTGACTTTTTAATGATCGCCATTCTAACTGGTGGGAGATGGTATCTCATTGTGGTTTTGATTTGCATTTCTCTGATGGCCAGTGATGATGAGCATTTTTTCATGTGTCTCTTGGCTGCATAAATGTCTTCTTTTGAGAAGTGTCTGTTCATATCCTTTGCCCACTTTTTGATGGGGTTGTTTGAGTTTT	030	regLM	18	-0.281163	-0.0393285	0.0744952	-0.059341	-0.039306	-0.314635
gen_337	CTCAGAATTAATGGAGAGGGCCAGTGGCGGCCTGTGCCCTTTGTCCCACCGGCCGGCCTGGGGGTGGCGGCTCCAGAATACAGGGTCCTATTGTGTGCGCTGATGTCAGGCAGCTGGACTGCTGGGAGTGAGGATAAACAAGCAGCTGGAGCATCTCGCCTGAAGCCCCAGGAGAGGGCCAGAGCCCCTGCAGCAGCCTG	030	regLM	97	3.73631	0.280799	1.73586	2.32727	0.280853	1.49989
gen_338	CCTCAGAATTAATGGAGAGGGCCAGTGGCGGCCTGTGCCCTTTGTCCCACCGGCCGGCCTGGGGGTGGCGGCTCCAGAATACAGGGTCCTATCGTGTGCCCTGATGTCAGGCAGCTGGACTGCTGGGAGTGAGGATAAACAAGCAGCTGGAGCATCTCGCCTGAAGCCCCAGGAGAGGGCCAGAGCCCCTGCAGCAGCAG	030	regLM	97	1.02583	0.208406	0.969267	1.24568	0.208433	0.671007
gen_339	GTTTAGCGTAAGAATCAGGGTCCAGCTGGTGCTCCCTAAACAGCAGCTGCTGTTCACTGTTGAAAGGCGCTCTGGAAGGCCAGGTGCGGTGGCTCATGCTTGTAATCCCAGCACTATCTGTAGTCCCAGCACTGTGGGAGGCCGAGGTGGGCGGATCACCTGAGGTAGGGAGTTCGAGACCAGCCTGACCAACGTGGAGA	030	regLM	79	0.0275992	2.11061	1.80394	0.249299	2.11055	-0.0568204
gen_340	GTTTAGCGTAAGAATCAGGGTCCAGCTGGTGCTCCCTAAACAGCAGCTGCTGTTCACTGTTGAAAGGCGCTCTGGAAGGCCAGGTGCGGTGGCTCATGCTTGTAATCCCAGCACTGTGGGAGGCCGAGGTGGGCGGATCACAAGGTCAGGAGTTCGAGACCAGCCTGACCAACGTGGAGAAACCCCATCTCTACTAAAAA	030	regLM	66	0.155522	2.72457	3.86667	0.474871	2.72455	1.95118
gen_341	CTGGCTGTTTCCTGACTTTTTAATGATCGCCATTCTAACTGGTGGGAGATGGTATCTCATTGTGGTTTTGATTTGCATTTCTCTGATGGCCAGTGATGATGAGCATTTTTTCATGTGTCTTTTGGCTGCATAAATGTCTTCTTTTGAGAAGTGTCTGTTCATATCCTTTGCCCACTTTTTGATGGGGTTGTTTGTTTTTT	030	regLM	19	-0.301491	-0.0848917	0.0594578	-0.132504	-0.0848694	-0.309943
gen_342	CCTGAGAAAGGCTTCAACTAAAGAGCTATGGACAGGGACACTCTGTCACTTCCTGGGATTTTGACCCCCAGCTGTCCAACAGAGGAGGGTCTGTGCCTTTGCTCATTAGCCTAACTTAGATGATAGGTGACAAACTGAAATGAGCTATAGGGAGTTGTCCACTTCCAGGCTGTTATCCTTAAACCACCTCAGCCTTTGCG	030	regLM	13	-0.100789	0.432259	-0.521598	-0.199286	0.432259	-0.767182
gen_343	CCAGTAATGGGATGGCTGGGTCCAATGGTATTTCTAGTTCTAGATCCTTGAGGAATTGCCACACTGACTTCCACAATGGTTGAACTAGTTTACAGTCCCGCCAACAGTGTAAAATTGTTCCTATTTCTCCACATCCTCTCCAGCACCTGTTGTTTCCTGACTTTTTAATGATCGCCATTCTAACTGGTGTGAGATGGTAT	030	regLM	7	-0.479946	0.557084	-0.485922	-0.118727	0.557075	-0.535413
gen_344	CTCAGAATTAATGGAGAGGGCCAGTGGCGGCCTGTGCCCTTTGTCCCACTGGCCGGCCTGGGGGTGGCGGCTCCAGAATACAGGGTCCTATTGTGTGCCCTGATGTCAGGCAGCTGGACTGCTGGGAGTGAGGATAAACAAGCAGCTGGAGCATCTCGCCTGAAGCCCCAGGAGAGGGCCAGAGCCCCTGCAGCAGCAGT	030	regLM	96	2.93628	0.0479399	1.38065	2.25562	0.0480389	1.23377
gen_345	AGAAAAAAACAAACAACCCCATCAACAAGTGGGTGAAGGATATGAACAGACACTTCTCAAAAGAAGATATTTATTCAACCAAAAGACACATGAAAAAATGCTCATCATCACTGGCCATCAGAGAAATGCAAATCAAAACCACAATGAGATACCATCTCACACCAGTTAGAATGGCGATCATTAAAAAGTCAGGAAACAAC	030	regLM	43	-0.526985	0.458329	-0.00280378	-0.219029	0.458484	-0.340057
gen_346	CATTCCATTCCATTCCATTCTGCATTCTGTTCCATTCTCCATTCCATTCCATTCTCCATACCATCCTCCATTCCATTACACTGCATTCCATTCTCCATTATATTTTATTCACCACGGCATTCCATTACATTTTCCATTCCATTCTATTCTCCATTCCATTCCATTCTCCATTCCATTCCATTCTCCATTCCATTCCCCTT	030	regLM	91	-0.763706	-0.334291	3.56024	-0.344845	-0.334356	-0.673268
gen_347	CTGTTTGTGCTGTGTGTTTCCAATAATTGACAACATATGTGATTTTGTTATTCTACACTGAGCTTGCTTCGTCTGCATATTCATTAAAAAAGAATTTTTAAAATCTTTGTCAGATGTTCTACATCTGAATCATCTTCTAGTATTAAACCACAGCCAAGAACTTTTATATCTTTTATCACATTAATATAAAGATTCGTGGA	030	regLM	95	-0.273903	-0.728851	3.34727	0.360174	-0.728874	1.52071
gen_348	GTTTAGCGTAAGAATCAGGGTCCAGCTGGTGCTCCCTAAACAGCAGCTGCTGTTCACTGTTGAAAGGCGCTCTGGAAGGCCGGGTGCGGTGGCTCATGCTTGTAATCCCAGCACTGTGGGAGGCCGAGGTGGGCGGATCACCTGAGGTAAGGAGTTCGAGACCAGCCTGACCAACGTGGAGAAACCCCATCTCTCCTAAA	030	regLM	61	0.329384	2.69285	3.29464	0.585019	2.69288	1.64057
gen_349	ACTGGGATTGCTTGGTTGAATGGTAGTTCCATTTTTAGTTCTTTGAGAAATCTCCAAACTGCTTTCCACAGCAGCTTAACTAATTTACATTCCCACCAGCACTGTCTTAAGTGTTTCCTTTTCTCCGCAGTCTTGCCAGCATCTGTAATTTTTTGACTTTTTAATGATATTCTTTATGACTGGTGCAAGATGGTATCTCA	030	regLM	52	-0.00203583	0.664605	0.670005	0.241302	0.664623	0.524578
gen_350	ATTAGCATGGAATTTGGACTTTGGAGCCATAATCCTGTTGTCTTCTTTCATTTAAAGAATATGGGCCAGGCGCGGTGGCTCACGCCTGTAATCCCAGCACTTTGGGAGGCCGAGGCAGGTGGATCACGAGGTCAGGAGATCGAGACCATCCTGGCTAACACGGTGAAAGCCTGTCTCTACTAAAAATACAAAAAAATTAG	030	regLM	59	0.112486	3.0176	1.45033	0.971634	3.01795	2.21627
gen_351	CATGTTGCCTATGGTATTATAAGAATTGAAAGAAGGCCAGGCGCAGTGGCTCACACCTGTAATCCCAGCACTTTGGGAGGCTGAGGTGGGCAGATCACTTGAGGTCAGGAGTTCGAGACCAGCCTGGCCAACATGGTGAAACCCTGTCTCTACTAAAAATACAAAAATTAGCCAGGCATGGTGGTGCACACCTGTAATCC	030	regLM	45	-0.233964	3.4043	3.25997	-0.0716633	3.40436	1.07735
gen_352	CCATCTGTTCCATCCTCACCCACCCAAGGAGCCGCCCCTGCTCCTAGAGACTCTGGGCACCACTGATAAGGGTGGGTACCAGGAACTCCACCCTTTACCGAGAAAGGCAGGCTGGTTTATCGCCACTCAGACCCAGCCAGCGACCACCCTGGGGAGTGTGTCAGCCACCAGGAGCATCGCTGTTGGGGAAATGTTATCAT	030	regLM	84	-0.0286997	7.42822	0.409073	0.0264143	7.42827	1.20442
gen_353	TCTCTGCTCCCCAGAGTCCCTGCACGTGGCTTGACAGTGGCCTTGGTAGGACCCACTGGGGTGTTTCTTCGTCGCCCATGGGCCCTCATGCTGTTATCAGTTGGAAATGAATCAGAGATTAGGAAGCGGGGGGAGTGGTGGGGGTGTTATCGCCCAGTGCACACAGGTTACCACAGACATTTATCCGTTGTCAGACACTT	030	regLM	24	0.670909	5.44098	-0.739274	0.367958	5.44099	-0.282726
gen_354	ATTAGCATGGAATTTGGACTTTGGAGCCATAATCCTGTTGTCTTCTTTCATTTAAAGAATATGGGCCGGGCGCGGTGGCTCACGCCTGTAATCCCAGCACTTTGGGAGGCCGAGGCGGGTGGATCATGAGGTCAGGAGATCGAGACCATCCTGGCTAACACGGTGAAAGCCTGTCTCTACTAAAAATACAAAAAAATTAG	030	regLM	57	0.285897	3.08971	1.45698	1.2437	3.08958	1.78278
gen_355	CCTGAGAAAGGCTTCAACTAAAGAGCTATGGACAGGGACACTCTGTCACTTCCTGGGATTTTGACCCCCAGCTGTCCAACAGAGGAGGGTCTGTGCCTTTGCTCATTAGCCTAACTTAGATGATAGGTGACAAACTGAAGTGAGCTATGGGGAGAGGTACCTCATTTATCTGTTGCTGGGTGTGTCACAGCAGGTGACGT	030	regLM	26	-0.0758041	1.47972	-1.13187	-0.215618	1.47977	-1.0983
gen_356	ACTGGGATTGCTTGGTTGAATGGTAGTTCCATTTTTAGTTCTTTGAGAAATCTCCAAACTGCTTTCCACAGCAGCTTAACTAATTTACATTCCCACCAGCACTGTCTTAAGTGTTTCCTTTTCTCCGCAGCCTTGCCAGCATCTGTAATTTTTTGACTTTTTAATGATATTCTTTATGACTGGTGCAGGATGGTATCCCA	030	regLM	53	0.0775307	0.381875	0.715581	0.296488	0.381929	0.700353
gen_357	CCAGTAATGGGATGGCTGGGTCCAATGGTATTTCTAGTTCTAGATCCCTGAGGAATTGCCACACTGACTTCCACAATGGTTGAACTAGTTTACAGTCCCACCAACAGTGTAAAATTGTTCCTATTTCTCCACATCCTCTCCAGCACCTGTTGTTTCCTGACTTTTTAATGATCGCCATTCTAACTGGTGTGAGATGGTAT	030	regLM	6	-0.470082	0.277759	-0.424602	-0.0975693	0.277743	-0.517211
gen_358	ATATTGGTACAGCACATTTGTCGCTATTAATAAACCAGTATCCAGGGCCAGGTGCAGTGGCTCACGCCTGTAATCCCAGCACTTTGGGAGGCCGAGGCAGGTGGATCACCTGAGGTCAGGAGTTCGAGACCAGCCTGACCAGTATGGAGAAACCCCATCTCTACTAAAAATACAAAATTAGCTGGGCTTGGTGGTGCATG	030	regLM	51	-0.30842	3.17473	3.07057	-0.0981278	3.17493	0.676443
gen_359	GTTTAGCGTAAGAATCAGGGTCCAGCTGGTGCTCCCTAAACAGCAGCTGCTGTTCACTGTTGAAAGGCGCTCTGGAAGGCCAGGTGCGGTGGCTCATGCTTGTAATCCCAGGACTTTGGGAGGCCGAGGTGGGCGGATCACCTGAGGTAAGGAGTTCGAGACCAGCCTGACCAACGTGGAGAAACCCCATCTCTCCTAAA	030	regLM	62	-0.000275562	2.70331	3.39315	0.117988	2.70333	1.03032
gen_360	AGAATTGGAAGGAGCTTAGGGGAAAGCTAGCCTCAGGTCAGAATTGCCTGCATGCCACTCGGCTAGTGAGCTGCTGAATCACCTTATTCCTGGAGAAAGATTTTGTTTTTTATTTTATTTTATTTTATTTTATTTTATTTTATTTTATTTTATTTTATTTTATTTTATTTTATTTTATTTAACATAAGACTTTGAATTCT	030	regLM	96	0.235456	0.250055	0.640892	0.228018	0.25002	0.927905
gen_361	CCAGTAATGGGATGGCTGGGTCCAATGGTATTTCTAGTTCTAGATCCCTGAGGAATTGCCACACTGACTTCCACAATGGTTGAACTAGTTTACAGTCCCACCAACAGTGTAAAATTGTTCCTGTTTCTCCACATCCTCTCCAGCACCTGTTGTTTCCTGACTTTTTAATGATCGCCATTCTAACTGGTGTGAGATGGTAT	030	regLM	7	-0.436188	0.725893	-0.46651	-0.028097	0.725856	-0.469203
gen_362	AGAATTGGAAGGAGCTTAGGGGAAAGCTAGCCTCAGGTCAGAATTGCCTGCATGCCACTCGGCTAGTGAGCTGCTGAATCACCTTATTCCTGGAGAAAGATTTTGTTTTTTATTTTATTTTATTTTATTTTATTTTATTTTATTTTATTTTATTTTATTTTATTTTATTTTATTTTATTTAACATAAGACTTTGAAATGC	030	regLM	97	0.244439	0.269855	0.638994	0.241073	0.269961	0.97206
gen_363	TCTCTGCTCCCCAGAGTCCCTGCACGTGGCTTGACAGTGGCCTTGGTAGGACCCACTGGGGTGTTTCTTCGTCGCCCATGGGCCCTCATGCTGTTATCAGTTGGAAATGAATCAGAGATTAGGAAGCGGGGGGAGTGGTGGGGGTGTTATCGCCCAGTGCACACAGGTTACCACAGACAGGGTCTGGGATCGAGGTTGGG	030	regLM	20	0.514623	4.51271	-0.913094	0.114554	4.51265	-0.474266
gen_364	CCAGTAATGGGATGGCTGGGTCCAATGGTATTTCTAGTTCTAGATCCCTGAGGAATTGCCACACTGACTTCCACAATGGTTGAACTAGTTTACAGTCCCACCAACAGTGTAAAATTATTCCTATTTCTCCACATCCTCTCCAGCACCTGTTGTTTCCTGACTTTTTAATGATTGCCATTCTAACTGGTGTGAGATGGTAT	030	regLM	6	-0.645784	-0.0511261	-0.512484	-0.228301	-0.0511523	-0.597364
gen_365	CCTGAGAAAGGCTTCAACTAAAGAGCTATGGACAGGGACACTCTGTCACTTCCTGGGATTTTGACCCCCAGCTGTCCAACAGAGGAGGGTCTGTGCCTTCGCTCATTAGCCTAACTTAGATGATAGGTGACAAACTGAAATGAGCTATAGGGAGTTGTCCACTTCCAGGCTGCTATCACTGTCTCAGATGTTGTACTTTT	030	regLM	14	-0.0282587	0.925927	-0.388404	-0.152902	0.925926	-0.630205
gen_366	CCCGAATACTGTGCTTTTCCGACGGGCTTAGGAAACGGCACACCAGGATATTATATCCTGCACCTGGCTCGGAGGGTCCTACGTGCACGGAGTCTCGCTCATTGCTAGCACAGAAGTCTGAGATCAAACTGCAAGGCGGCAGCGAGGCTGGGGGAGGGGTGCCCGCCATTGCCCAGGCTTGCTTAGGTAAACAGAGCAGT	030	regLM	96	1.03677	0.129127	1.5422	2.1428	0.129112	0.0760693
gen_367	CCAGTAATGGGATGGCTGGGTCCAATGGTATTTCTAGTTCTAGATCCCTGAGGAATTGCCACACTGACTTCCACAATGGTTGAACTAGTTTACAGTCCCGCCAACAGTGTAAAATTGTTCCTGTTTCTCCACATCCTCTCCAGCACCTGTTGTTTCCTGACTTTTTAATGATCGCCATTCTAACTGGTGTGAGATGGTAT	030	regLM	7	-0.405685	1.03834	-0.525146	0.0438222	1.0382	-0.41116
gen_368	TCTCTGCTCCCCGGAGTCCCTGCACGTGGCTTGACAGTGGCCTTGGTAGGACCCACTGGGGTGTTTCTTCGTCGCCCATGGGCCCTCATGCTGTTATCAATTGGAAATGAATCAGAGATTAGGAAGCGGGGGGAGTGGTGGGGGTGTTATCGCCCAGTGCACACAGGTTACCACAGACATTTAGCCCTCACTGCAGTTTC	030	regLM	20	0.195024	4.52548	-0.593088	0.0531964	4.52547	-0.294548
gen_369	ACTGGGATTGCTTGGTTGAATGGTAGTTCCATTTTTAGTTCTTTGAGAAATCTCCAAACTGCTTTCCACAGCAGCTTAACTAATTTACATTCCCACCAGCACTGTCTTAAGTGTTTCCTTTTCTCCACAGCCTTGCCAGCATCTGTAATTTTTTGACTTTTTAATGATATTCTTTATGACTGGTGCAGGATGGTATCTCA	030	regLM	51	0.0609686	0.589426	0.629251	0.231884	0.589468	0.331616
gen_370	TCTCTGCTCCCCAGAGTCCCTGCACGTGGCTTGACAGTGGCCTTGGTAGGACCCACTGGGGTGTTTCTTCGTCGCCCATGGGCCCTCATGCTGTTATCAGTTGGAAATGAATCAGAGATTAGGAAGCGGGGGGAGTGGTGGGGGTGTTATCGCCCAGTGCACACAGGTTACCACAGAGGTCACACGGTAGGTAACCTGCC	030	regLM	24	0.854259	3.88714	-1.16658	0.789477	3.88695	-0.692018
gen_371	CCAGTAATGGGATGGCTGGGTCCAATGGTATTTCTAGTTCTAGATCCCTGAGGAATTGCCACACTGACTTCCACAATGGTTGAACTAGTTTACAGTCCCACCAACAGTGTATAAGTGTTCCTATTTCTCCACATCCTCTCCAGCACCTGTTGTTTCCTGACTTTTTAATGATCGCCATTCTAACTGGTGTGAGATGGTAT	030	regLM	8	-0.45646	0.558467	-0.431651	-0.0640473	0.558491	-0.514405
gen_372	CATGTTGCCTATGGTATTATAAGAATTGAAAGAAGGCCAGGCGCAGTGGCTCACACCTGTAATCCCAGCACTTTGGGAGGCTGAGGCGGGCAGATCACTTGAGGTCAGCAGTTCGAGACCAGCCTGGCCAACATGGTGAAACCCCATCTCTACTAAAAATACAAAAATTAGCCAGGCATGGTGGTGCACACCTGTAATCC	030	regLM	45	-0.217371	3.48248	3.39002	-0.0513081	3.48247	0.499958
gen_373	CCTGAGAAAGGCTTCAACTAAAGAGCTATGGACAGGGACACTCTGTCACTTCCTGGGATTTTGACCCCCAGCTGTCCAACAGAGGAGGGTCTGTGCCTTTGCTCATTAGCCTAACTTAGATGATAGGTGACAAACTGAAGTGAGCTATAGGGAGTTGTCCACTTCCAGGCTGCTATCAGTACACCAGCTGGCCTGCTCCA	030	regLM	6	0.146277	3.53509	-0.563075	-0.127678	3.53502	-0.751833
gen_374	TCTCTGCTCCCCAGAGTCCCTGCACGTGGCTTGACAGTGGCCTTGGTAGGACCCACTGGGGTGTTTCTTCGTCGCCCATGGGCCCTCATGCTGTTATCAGTTGGAAATGAATCAGAGATTAGGAAGCGGGGGGAGTGGTGGGGGTGTTATCGCCCAGTGCACACAGGTTACCACAGAGGTCACACGGTAGGTGCTCAGTA	030	regLM	23	0.880514	4.80514	-1.00296	0.76134	4.80509	-0.572918
gen_375	TCTCTGCTCCCCAGAGTCCCTGCACGTGGCTTGACAGTGGCCTTGGTAGGACCCACTGGGGTGTTTCTTCGTCGCCCATGGGCCCTCATGCTGTTATCAGTTGGAAATGAATCAGAGATTAGGAAGCGGGGGGAGTGGTGGGGGTGTTATCGCCCAGTGCACACAGGTTATCACAGCTCAGGGGTTCGAAGTTCAAAGGC	030	regLM	21	1.92458	4.89668	-0.671691	2.16624	4.89681	-0.442392
gen_376	GATTTTTCTACTGCTAGGTTTTCCTTTTGGGGTTACGATTATTACAGGTGGCAATCAGTTAACTTAGTGGTTCTGTAGGCACCGCCCTATCTTCCAACTCACTTACATTTAAAAATTCACACAGAGAGGCTAGTGGGAAGCGGGTAGGTGTAAACAATGTGCTACAGTGAGACTGAAGGCAAAGTCAATTCCTGGAGCTA	030	regLM	99	0.746096	1.68527	0.103236	0.48105	1.68521	0.313095
gen_377	CCTCAGAATTAATGGAGAGGGCCAGTGGCGGCCTGTGCCCTTTGTCCCACCGGCCGGCCTGGGGGTGGCGGCTCCAGAATACAGGGTCCTATTGTGTGCACTGATGTCAGGCAGCTGGACTGCTGGGAGTGAGGATAAACAAGCAGCTGGAGCATCTCGCCTGAAGCCCCAGGAGAGGGCCAGAGCCCCTGCAGCAGCCC	030	regLM	97	3.13128	0.162306	1.50838	2.2922	0.162325	1.45638
gen_378	CCTGAGAAAGGCTTCAACTAAAGAGCTATGGACAGGGACACTCTGTCACTTCCTGGGATTTTGACCCCCAGCTGTCCAACAGAGGAGGGTCTGTGCCTTTGCTCATTAGCCTAACTTAGATGATAGGTGACAAACTGAAATGAGCTATAGGGAGTTGTCCACTTCCAGGCTGCTATCAGTGTGACAGAGGTTGGATTCCA	030	regLM	11	-0.0578627	1.1472	-0.781935	-0.158953	1.14713	-0.814939
gen_379	GATTTTTCTACTGCTAGGTTTTCCTTTTGGGGTTACGATTATTACAGGTGGCAATCAGTTAACTTAGTGGTTCTGTAGGCACCGCCCTATCTTCCAACTCACTTACATTTAAAAATTCACACAGAGAGGCTAGTGGGAAGCGGGTAGGTGTAAACAATGTGCTACAGTGAGAATCCAGTGGAGAGCCTGGGGTCTTCCTG	030	regLM	101	0.472552	1.14172	0.214104	0.240878	1.14134	0.226428
gen_380	CAGAATTTTAAGCGGCTCAATTTACTTTCGTGTTATTTTTAATAACAATGACCATAGTAATGCCTTTTCCCCCTTAAAATGTACAGGCTTATTCAAATAAAATGAGAAATGCCAATGGAATATACTCATCTGGGAAATTACATTTTAACGTCATAGCCAAGGAACTGTGCAATGGCAAAGGCAAATCTAAAAATAGGAGG	030	regLM	99	0.940306	0.46692	4.50668	0.412431	0.466924	3.66351
gen_381	AGAATTGGAAGGAGCTTAGGGGAAAGCTAGCCTCAGGTCAGAATTGCCTGCATGCCACTCGGCTGGCTAGTGAGCTGCTGAATCACCTTATTCCTGGAGAAAGACTTTGATACTGAGAAAACTGACTTGCTCAGCTCTTGCTACAACTGTGACCATCTCTGCAACAGTAAAGTAAAAACAAATACCTCTCTTGTTGGTGA	030	regLM	94	0.312844	0.896512	0.215341	0.134347	0.896534	0.485843
gen_382	CTCAGAATTAATGGAGAGGGCCAGTGGCGGCCTGTGCCCTTTGTCCCACCGGCCGGCCTGGGGGTGGCGGCTCCAGAATACAGGGTCCTATTGTGTGCCCTGATGTCAGGCAGCTGGACTGCTGGGAGTGAGGATAAACAAGCAGCTGGAGCATCTCGCCTGAAGCCCCAGGAGAGGGCCAGAGCCCCTGCAGCAGGAGG	030	regLM	98	3.00748	-0.0146794	1.23813	2.14694	-0.0146918	1.16486
gen_383	TCTCTGCTCCCCAGAGTCCCTGCACGTGGCTTGACAGTGGCCTTGGTAGGACCCACTGGGGTGTTTCTTCGTCGCCCATGGGCCCTCATGCTGTTATCAATTGGAAATGAATCAGAGATTAGGAAGCGGGGGGAGTGGTGGGGGTGTTATCGCCCAGTGCACACGGGGCTCTCAGCTAATCTCTGGCGGCCCTGGGTCAT	030	regLM	3	0.00787468	5.41683	-0.181654	0.234337	5.41681	-0.000184802
gen_384	CCTCAGAATTAATGGAGAGGGCCAGTGGCGGCCTGTGCCCTTTGTCCCACTGGCCGGCCTGGGGGTGGCGGCTCCAGAATACAGGGTCCTATTGTGTGCACTGATGTCAGGCAGCTGGACTGCTGGGAGTGAGGATAAACAAGCAGCTGGAGCATCTCGCCTGAAGCCCCAGGAGAGGGCCAGAGCCCCTGCAGCAGCAG	030	regLM	95	3.19723	0.264661	1.73442	2.42231	0.264634	1.37524
gen_385	GTTTAGCGTAAGAATCAGGGTCCAGCTGGTGCTCCCTAAACAGCAGCTGCTGTTCACTGTTGAAAGGCGCTCTGGAAGGCCAGGCGCGGTGGCTCATGCCTGTAATCCCAGCACTGTGGGAGGCCGAGGTGGGCGGATCACCTGAGGTAAGGAGTTCGAGACCAGCCTGACCAACGTGGAGAAACCCCATCTCTCCTAAA	030	regLM	62	0.327431	3.14671	4.15611	0.671995	3.14673	2.06963
gen_386	CCAGTAATGGGATGGCTGGGTCCAATGGTATTTCTAGTTCTAGATCCCTGAGGAATTGCCATACTGACTTCCACAATGGTTGAACTAGTTTACAGTCCCACCAACAGTGTAAAATTATTCCTATTTCTCCACATCCTCTCCAGCACCTGTTGTTTCCTGACTTTTTAATGATCGCCATTCTAACTGGTGTGAGATGGTAT	030	regLM	6	-0.621453	0.0635692	-0.494467	-0.259421	0.0636501	-0.568309
gen_387	TCTCTGCTCCCCAGAGTCCCTGCACGTGGCTTGACAGTGGCCTTGGTAGGACCCACTGGGGTGTTTCTTCGTCGCCCATGGGCCCTCATGCTGTTATCAATTGGAAATGAATCAGAGATTAGGAAGCGGGGGGAGTGGTGGGGGTGTTATCGCCCAGTGCACACAGGTTACCACAGAGGTCATAGGTAACCTCGGGCGAT	030	regLM	21	0.353778	3.20297	-0.926025	0.223995	3.2028	-0.708608
gen_388	GTTTAGCGTAAGAATCAGGGTCCAGCTGGTGCTCCCTAAACAGCAGCTGCTGTTCACTGTTGAAAGGCGCTCTGGAAGGCCAGGTGCGGTGGCTCATGCTTGTAATCCCAGCACTGTGGGAGGCCGAGGTGGGGGGATCACTTGAGGCCAGGAGTTCGAGACCAGCCTGGCCAACATGGTGAAACCCCGTCTCTACTAAA	030	regLM	60	-0.0334245	2.00272	2.44738	0.196039	2.00268	0.873109
gen_389	CCTGAGAAAGGCTTCAACTAAAGAGCTATGGACAGGGACACTCTGTCACTTCCTGGGATTTTGACCCCCAGCTGTCCAACAGAGGAGGGTCTGTGCCTTCGCTCATTAGCCTAACTTAGATGATAGGTGACAAACTGAAGTGAGCTATGGGGAGAGGTACCTCATTTATCTGTTGCTGGGTGTGTCACAGCAGGGGATGG	030	regLM	24	-0.0793833	2.02345	-0.719132	-0.206639	2.02348	-0.859554
gen_390	GAGAAATTCTCAAGGAGGAGGACACAAACAGGACTGGAAGGGGAGCAGGACTGAGCCAAGCGGATGAGAGGAAAGAGGCATTCCAGTCCTCTGGGGAAGCATGGGAGGTAGGAATTCTTGCCACCAGTGGTTTGGACAAACACACAGAGTGGGTCACCGGGTCAGAGCCGAGGGTTAGGACGGGAGAGGAGCAAAGGTCA	030	regLM	97	3.44016	0.754841	0.112968	2.1147	0.754665	0.270881
gen_391	CCAGTAATGGGATGGCTGGGTCCAATGGTATTTCTAGTTCTAGATCCCTGAGGAATCGCCACACTGACTTCCACAATGGTTGAACTAGTTTACAGTCCCACCAACAGTGTGAAATTATTCCTATTTCTCCACATCCTCTCCAGCACCTGTTGTTTCCTGACTTTTTAATGATCGCCATTCTAACTGGTGTGAGATGGTAT	030	regLM	5	-0.613031	0.0710651	-0.562853	-0.23102	0.0711173	-0.55187
gen_392	CCATCTGTTCCATCCTCACCCACCCAAGGAGCCGCCCCTGCTCCTAGAGACTCTGGGCACCACTGATAAGGGTGGGTACCAGGAACTCCACCCTTTACCGAGAAAGGCAGGCTGGTTTATCGCCACTCAGACCCAGCCAGCGACCACCCTGGGGAGTGTGTCAGCCACCAGGAGCATCGCTGTTGGGGAATGGGTTGGGG	030	regLM	85	-0.114035	7.29132	0.515624	-0.033892	7.29138	1.1978
gen_393	CCAGTAATGGGATGGCTGGGTCCAATGGTATTTCTAGTTCTAGATCCCTGAGGAATTGCCACACTGACTTCCACAATGGTTGAACTAGTTTACAGTCCCGCCAACAGTGTAAAAGTGTTCCTATTTCTCCACATCCTCTCCAGCACCTGTTGTTTCCTGACTTTTTAATGATCGCCATTCTAACTGGTGTGAGATGGTAT	030	regLM	7	-0.355345	0.27291	-0.436717	-0.0477754	0.272902	-0.483563
gen_394	TCTCTGCTCCCCAGAGTCCCTGCACGTGGCTTGACAGTGGCCTTGGTAGGACCCACTGGGGTGTTTCTTCGTCGCCCATGGGCCCTCATGCTGTTATCAGTTGGAAATGAATCAGAGATTAGGAAGCGGGGGGAGTGGTGGGGGTGTTATCGCCCAGTGCACACAGGTTACCACAGATGGAATAAACGTTCGTTGAAGAT	030	regLM	25	0.713235	5.13917	-0.922196	0.158733	5.13928	-0.43745
gen_395	ATTATGATACAGTCCAAGTATGTAACTTTCTGGGGACCAGACTTTGCTGAGAGTCATAATGGAGAGTCAAAGAGTCTGATGGCTGAGAGGGATGTGCCTAGGCTTGCCTTCATAAATGTTCATTGTCTCAGCCAAGGTTTTGGCAGGAGCGAGAGCAGGCTCAGATCAGTGTCACAGGCAAGATCCAGCACAGACAGTGT	030	regLM	95	1.38527	0.0494926	5.30905	1.11024	0.0495154	2.13055
gen_396	ATATTGGTACAGCACATTTGTCGCTATTAATAAACCAGTATCCAGGGCCAGGTGCAGTGGCTCACGCCTGTAATCCCAGCACTTTGGGAGGCCGAGGCAGGTGGATCACCTGAGGTCAGGAGTTCGAGACCAGGCTGACCAACATGGGAAAACCCTGTCTCTACTAAAAATACAAAATTAGCTGGGCTTGGTGGTGCATG	030	regLM	49	-0.339959	2.78739	2.41354	-0.239777	2.78718	0.165905
gen_397	CATGTTGCCTATGGTATTATAAGAATTGAAAGAAGGCCAGGCGCAGTGGCTCACACCTGTAATCCCAGCACTTTGGGAGGCTGAGGCGGGCAGATCACTTGAGGTCAGCAGTTCGAGACCAGCCTGGCCAACATGGTGAAACCCTATCTCTACTAAAAATACAAAAATTAGCCAGGCATGGTGGTGCACACCTGTAATCC	030	regLM	46	-0.239603	3.39242	3.45689	-0.12473	3.39246	0.23915
gen_398	GTTTAGCGTAAGAATCAGGGTCCAGCTGGTGCTCCCTAAACAGCAGCTGCTGTTCACTGTTGAAAGGCGCTCTGGAAGGCCAGGTGCGGTGGCTCATGCTTGTAATCCCAGCACTGTGGGAGGCCGAGGTGGGCGGATCACCTGAGGTACGGAGTTCGAGACCAGCCTGACCAACGTGGAGAAACCCCATCTCTCCTAAA	030	regLM	63	0.110789	2.32464	3.23709	0.341325	2.32466	0.630904
gen_399	CAAATCAATTAAGCTAAAATAAATCAAAGTTGGAACAAAGCCACCAATATAATGTTAAAAAGTATTCAAATGTAAAACCAATTGAGCCAAAAATAGCATAATGATGTAACCATTTGGAATGAGCATTTATGAGGCTTTAAATCATTTTTATATTACTATTTTAAGGATCAGCACTGCCAGCAATGATTCTGAGGCTGAGG	030	regLM	94	0.809203	0.398715	2.83577	0.635766	0.398681	3.59261
gen_400	CCAGTAATGGGATGGCTGGGTCCAATGGTATTTCTAGTTCTAGATCCCTGAGGAATTGCCACACTGACTTCCACAATGGTTGAACTAGTTTACAGTCCCGCCAACAGTGTAAAATTATTCCTATTTCTCCACATCCTCTCCAGCACCTGTTGTTTCCTGACTTTTTTTATTTGTATATATATATATATATATATATATAT	030	regLM	23	-0.499764	-0.0369303	-0.517713	-0.0616054	-0.0369916	-0.213605
gen_401	CTACTTGGGAGGCTGAGACAGAAGAATGGCATGAACCTGGGAGACTGAGACAGGAGAATGGCATGAACCTGGGAGACGGAGGTTGCAGTGAGCCGAGATCGTGCCACTGCACTCCAGCCTGGGCGAGAGAGAGAGAGAGAGAGAGAGAGAGAGAGAGAGAGAGAGAGAGAGAGAGAGAGAGAGAGAGAGAGAGAGAGAGA	030	regLM	89	0.285581	2.04537	1.73332	0.132194	2.0453	0.429676
gen_402	CTCTCTATTACATTCCATTCTCCATTCCATTCCATTCTCCATTCCATTCCACTCCATTCTCCATTCCATTCCACTCCATTCTCCATTCCATTCCATTCTCCATTATATTCTCCATTCCATTCCATTCTCCATTACATTCCATTCTCCATTACATTCCATTCTCCATTACATTCCATTCCATTCTCCATTCCATTCCCCTT	030	regLM	87	-0.634235	-0.232211	3.71957	-0.286618	-0.232087	-0.200227
gen_403	GTTTAGCGTAAGAATCAGGGTCCAGCTGGTGCTCCCTAAACAGCAGCTGCTGTTCACTGTTGAAAGGCGCTCTGGAAGGCCAGGCGCGGTGGCTCATGCTTGTAATCCCAGCACTGTGGGAGGCCGAAGTGGGCGGATCACCTGAGGTAAGGAGTTCGAGACCAGCCTGACCAACGTGGAGAAACCCCATCTCTCCTAAA	030	regLM	64	0.361168	2.93377	4.35633	0.675804	2.93386	1.72411
gen_404	ACTGGGATTGCTTGGTTGAATGGTAGTTCCATTTTTAGTTCTTTGAGAAATCTCCAAACTGCTTTCCACAGCAGCTTAACTAATTTACATTCCCACCAGCACTGTCTTAAGTGTTTCCTTTTCTCCGCAGCCTTGCCAACATCTGTAATTTTTTGACTTTTTAATGATATTCTTTATGACTGGTGCGAGATGGTATCTCA	030	regLM	51	0.0664963	0.937876	0.557388	0.305091	0.93801	0.552395
gen_405	CTCAGAATTAATGGAGAGGGCCAGTGGCGGCCTGTGCCCTTTGTCCCACCGGCCGGCCTGGGGGTGGCGGCTCCAGAATACAGGGTCCTATTGTGTGCCCTGATGTCAGGCAGCTGGACTGCTGGGTGCAAGGTGAGGATGGGCAAGTGGGTGGAGGTACCCACCACAGCTTGCCTGGGAAGCTGGAGCAGCCTGCCTGC	030	regLM	100	1.03545	-0.321876	0.132444	0.374381	-0.321873	0.118521
gen_406	CCCGAATACTGTGCTTTTCCGACGGGCTTAGGAAACGGCACACCAGGATATTATATCCTGCACCTGGCTCGGAGGGTCCTACGTGCACGGAGTCTCGCTGATTGCTAGCACAGAAGTCTGAGATCAAACTGCAAGGCGGCAGCGAGGCTGGGGGAGGGGTGCCCGCCATTGCCCAGGCTTGCTTAGGTACACCGTGCACA	030	regLM	95	0.731128	-0.0283355	1.0961	1.64551	-0.0283862	0.0736321
gen_407	TCTCTGCTCCCCAGAGTCCCTGCACGTGGCTTGACAGTGGCCTTGGTAGGACCCACTGGGGTGTTTCTTCGTCGCCCATGGGCCCTCATGCTGTTATCAGTTGGAAATGAATCAGAGATTAGGAAGCGGGGGGAGTGGTGGGGGTGTTATCGCCCAGTGCACACAGGTTACCACAGACGTTTAACAGCAGGCAAGCAGGA	030	regLM	25	1.2527	5.39603	-0.544572	0.887563	5.39605	-0.0797928
gen_408	GATTTTTCTACTGCTAGGTTTTCCTTTTGGGGTTACGATTATTACAGGTGGCAATCAGTTAACTTAGTGGTTCTGTAGGCACCGCCCTATCTTCCAACTCACTTACATTTAAAAATTCACACAGAGAGGCTAGTGGGAAGCGGGTAGGTGTAAACAATGTGCTACAGTGAGAATCCAGGGACATAGCTAAGAACCAGAAC	030	regLM	99	0.492977	1.25646	0.0595214	0.243484	1.25643	0.231094
gen_409	TCCTGAATGGGCAAAAACTGGAAGCATTCCCTTTGAAAACTGGCACAAGACAGGGATGCCCTCTCTCACCGCTCCTATTCAACATAGTGTTGGAAGTTCTGGCCAGGGCAATCAGGCAGGAGAAAGAAATAAAGGGTATTCAATTAGGAAAAGAGGAAGTCAAATTGTCCCTGTTTGCAGATGACATGACTGTATATTTA	030	regLM	19	-0.10381	0.0292719	-0.319962	0.273155	0.0293541	-0.0494675
gen_410	TCTCTGCTCCCCAGAGTCCCTGCACGTGGCTTGACAGTGGCCTTGGTAGGACCCACTGGGGTGTTTCTTCGTCGCCCATGGGCCCTCATGCTGTTATCAATTGGAAATGAATCAGAGATTAGGAAGCGGGGGGAGTGGTGGGGGTGTTATCGCCCAGTGCACACAGGTTACCACAGAGGTCACACGGTAGGTGAGGGGCA	030	regLM	21	0.248913	3.34468	-1.10397	0.197544	3.34464	-0.608453
gen_411	CCAGTAATGGGATGGCTGGGTCAAATGGTATTTCTAGTTCTAGATCCCTGAGGAATCGCCACACTGACTTCCACAATGGTTGAACTAGTTTACAGTCCCACCAACAGTGTAAAATTATTCCTATTTCTCCACATCCTCTCCAGCACCTGTTGTTTCCTGCCTTTTTAATGATCACCATTCTAACTGGTGTGAGATGGTAT	030	regLM	1	-0.585466	0.0106755	-0.489018	-0.134551	0.0105176	-0.451178
gen_412	TCTCTGCTCCCCAGAGTCCCTGCACGTGGCTTGACAGTGGCCTTGGTAGGACCCACTGGGGTGTTTCTTCGTCGCCCATGGGCCCTCATGCTGTTATCAGTTGGAAATGAATCAGAGATTAGGAAGCGGGGGGAGTGGTGGGGGTGTTATCGCCCAGTGCACACAGGTTACCACAGAGGTCACACGGTAGATGGGGGCTT	030	regLM	22	0.699208	5.003	-0.801543	0.610161	5.00305	-0.487169
gen_413	CCTGAGAAAGGCTTCAACTAAAGAGCTATGGACAGGGACACTCTGTCACTTCCTGGGATTTTGACCCCCAGCTGTCCAACAGAGGAGGGTCTGTGCCTTTGCTCATTAGTCCATTTTACAGAGAGCTGATTGGTCTGTTTTACAGAGAGCTGATTGGTCTGTTTTACAGAGAGCAATGTCTGGACACACAGAGGAGTGCA	030	regLM	45	4.01331	4.3613	4.75631	4.97055	4.36128	5.47965
gen_414	AGAATTGGAAGGAGCTTAGGGGAAAGCTAGCCTCAGGTCAGAATTGCCTGCATGCCACTCGGCTAGTGAGCTGCTGAATCACCTTATTCCTGGAGAAAGATTTTGTTTTTTATTTTATTTTATTTTATTTTATTTTATTTTATTTTATTTTATTTTATTTTATTTTATTTTATTTTATTTAACATAAGACTTTGAATTCC	030	regLM	96	0.234318	0.25627	0.632895	0.235763	0.256267	0.922115
gen_415	CTGGCTGTTTCCTGACTTTTTAATGATCGCCATTCTAACTGGTGGGAGATGGTATCTCATTGTGGTTTTGATTTGCATTTCTCTGATGGCCAGTGATGATGAGCATTTTTTCATGTGTCTCTTGGCTGCATAAATGTCTTCTTTTGAGAAGTGTCTGTTCATATCCTTTGCCCACTTTTTGATGGGGTTGTTTGTTTTTG	030	regLM	19	-0.27214	-0.00806862	0.0624877	-0.0735977	-0.00814703	-0.310271
gen_416	CCAGTAATGGGATGGCTGGGTCCAATGGTATTTCTAGTTCTAGATCCCTGAGGAATTGCCACACTGACTTCCACAATGGTTGAACTAGTTTACAGTCCCGCCAACAGTGTAAAATTATTCCTATTTCTCCACATCCTCTCCAGCACCTGTTGTTTCCTGCCTTTTTTTGTTGTTTTTTTTGAGACGGAGTCTCGCTCTGT	030	regLM	23	-0.248489	0.459652	-0.396213	0.325956	0.459599	-0.0396207
gen_417	AGAATTGGAAGGAGCTTAGGGGAAAGCTAGCCTCAGGTCAGAATTGCCTGCATGCCACTCGGCTAGTGAGCTGCTGAATCACCTTATTCCTGGAGAAAGATTTTGTTTTTTATTTTATTTTATTTTATTTTATTTTATTTTATTTTATTTTATTTTATTTTATTTTATTTAACATAAGACTTTGAGATGGAGTTTCACTC	030	regLM	98	0.171949	0.302805	0.600751	0.245002	0.302754	0.915754
gen_418	CCTGAGAAAGGCTTCAACTAAAGAGCTATGGACAGGGACACTCTGTCACTTCCTGGGATTTTGACCCCCAGCTGTCCAACAGAGGAGGGTCTGTGCCTTCGCTCATTAGCCTAACTTAGATGATAGGTGACAAACTGAAGTGAGCTATGGGGAGAGGTTGCCACAACTTAAATGTTATCCGGTTTTTCCTGGGTAATTCT	030	regLM	26	0.165056	0.239719	-0.0650498	-0.141952	0.239737	-0.369568
gen_419	CCATCTGTTCCATCCTCACCCACCCAAGGAGCCGCCCCTGCTCCTAGAGACTCTGGGCACCACTGATAAGGGTGGGTACCAGGAACTCCACCCTTTACCGAGAAAGGCAGGCTGGTTTATCGCCACTCAGACCCAGCCAGCAACCACCCTGGGGAGTGTGTCAGCCACCAGGAGCATCGCTGTTGGGGAATGGGTTGGTA	030	regLM	84	0.328738	8.07053	0.821773	0.19056	8.07057	1.638
gen_420	TCTCTGCTCCCCAGAGTCCCTGCACGTGGCTTGACAGTGGCCTTGGTAGGACCCACTGGGGTGTTTCTTCGTCGCCCATGGGCCCTCATGCTGTTATCAGTTGGAAATGAATCAGAGATTAGGAAGCGGGGGGAGTGGTGGGGGTGTTATCGCCCAGTGCACACAGGTTACCACAGACATTTCGCCAATAAGCAGCTTCT	030	regLM	23	1.2441	5.37209	-0.247825	0.969031	5.37203	0.0569702
gen_421	TATGTGGTCTCATATTTTGTTGCAGTGTCACCTCAAAATAATCAGAATTTTCACATTTAAAGATTTTTTTTCTAATCAGGAAGTGGGAATTAGTAGAGCTTCTTTGCTTTGTCTTCACCTTCTCTGACAGAAAACTTCCTCTGTGGTCATGACATTTCAAAGTAAAACCCTTCCTGTACCCAAGAGATAAGAAACTTTTA	030	regLM	97	0.835562	4.81968	0.230347	0.852315	4.81965	0.810828
gen_422	AAACAAATTTATAAGAAAAAACAAACAACCCCATCAAAAAGTGGGTGAAGGATATGAACAGACACTTCTCAAAAGAAGATATTTATTCAACCAAAAGACACATGAAAAAATGCTCATCATCACTGGCCATCAGAGAAATGCAAATCAAAACCACAATGAGATAACATCTCACACCAGTTAGACTGGCAAGCAGGCAAAGG	030	regLM	31	-0.32023	2.00179	-0.173513	-0.0225302	2.00191	-0.0508349
gen_423	CATGTTGCCTATGGTATTATAAGAATTGAAAGAAGGCCAGGCGCAGTGGCTCACACCTGTAATCCCAGCACTTTGGGAGGCTGAGGCAGGCAGATCACTTGAGGTCAGGAGTTCGAGACCAGCCTGGCCAACATGGTGAAACCCTGTCTCTACTAAAAATACAAAAATTAGCCAGGCATGGTGGTGCATGCCTGTAATCC	030	regLM	41	-0.152122	3.61183	2.9146	0.129892	3.61218	1.91248
gen_424	CTAGCTGTACCAGCCGCTGCCCCGGACCTGCTGCCCTGCCCCACGCACCCCCCCTCCCCTGGCCAGCCTCCCCAGAGGCCAGAAGGCGCCTTATCGGGCAGGGTTAAGGAGGGGGACAGTTATCAGGGGCTGCAGCCTAGATTGGGCCACAATGTCCTCGTCTCTTGAGGGTGGCAGGCTGTGCAGGCTCCCTGACCAGG	030	regLM	11	0.382476	3.80602	0.472797	0.183361	3.80602	0.491968
gen_425	GTTTAGCGTAAGAATCAGGGTCCAGCTGGTGCTCCCTAAACAGCAGCTGCTGTTCACTGTTGAAAGGCGCTCTGGAAGGCCAGGTGCGGTGGCTCATGCTTGTAATCCCAGCACTGTGGGAGGCCGAGGCAGGTGGATCACCTGAGGTAAGGAGTTCGAGACCAGCCTGACCAACGTGGAGAAACCCCATCTCTCCTAAA	030	regLM	63	-0.160724	2.0197	2.33493	-0.192697	2.01976	0.0370638
gen_426	GTTTAGCGTAAGAATCAGGGTCCAGCTGGTGCTCCCTAAACAGCAGCTGCTGTTCACTGTTGAAAGGCGCTCTGGAAGGCCAGGCGCGGTGGCTCATGCTTGTAATTCCAGCACTGTGGGAGGCCGAGGTGGGCGGATCACCTGAGGTAAGGAGTTCGAGACCAGCCTGACCAACGTGGAGAAACCCCATCTCTCCTAAA	030	regLM	64	0.408361	2.85776	3.46324	0.676129	2.8577	0.92908
gen_427	ATTAGCATGGAATTTGGACTTTGGAGCCATAATCCTGTTGTCTTCTTTCATTTAAAGAATATGGGCCAGGCGCGGTGGCTCACGCCTGTAATCCCAGCACTTTGGGAGGCCGAGGCAGGTGGATCACGAGGTCAGGAGATCGAGACCATCCTGGCTAACACAGTGAAACCCTGTCTCTACTAAAAATACAAAAAAATTAG	030	regLM	59	0.107325	3.18677	1.48002	0.804413	3.18672	2.10808
gen_428	ATTAGCATGGAATTTGGACTTTGGAGCCATAATCCTGTTGTCTTCTTTCATTTAAAGAATATGGGCCAGGCGCGGTGGCTCACGCCTGTAATCCCAGCACTTTGGGAGGCCGAGGCAGGTGGATCACGAGGTCAGGAGATCGAGACCATCCTGGCTAACACAGTGAAACCCTGTCTCTACTAAAAATACAAAAAATTAGC	030	regLM	59	0.0837575	3.12354	1.43649	0.759232	3.12345	2.22129
gen_429	CTCTCTATTACATTCCATTCTCCATTCCATTCCCATACATTCTCCACTCCACTGCATTCTCTATTCCATTCTCCATTCCATTCCACTCCATTCTCCATTCCATTCCATTCTCCATTCCATTCCATTCTCCATTACATTCCATTCTCCATTACATTCCATTCTCCATTACATTCCATTCTCCATTCCATTCCATTCTCCAT	030	regLM	87	-0.683892	-0.239642	3.72354	-0.260928	-0.239642	-0.111255
gen_430	ATTATGATACAGTCCAAGTATGTAACTTTCTGGGGACCAGACTTTGCTGAGAGTCATAATGGAGAGTCAAAGAGTCTGATGGCTGAGAGGGATGTGCCTGGGCTTGCCTTCATAAATGTTCATTGTCTCAGCCAAGGTTTTGGCAGGAGCGAGAGCAGGCTCAGATCAGTGTCACAGGCAGTACCTTACATATGCTGAAA	030	regLM	96	2.11541	0.0244279	6.28665	2.34322	0.0243728	4.17009
gen_431	GTTTAGCGTAAGAATCAGGGTCCAGCTGGTGCTCCCTAAACAGCAGCTGCTGTTCACTGTTGAAAGGCGCTCTGGAAGGCCAGGTGCGGTGGCTCATGCTTGTAATCCCGGCACTGTGGCAGGCCGAGGTGGGCGGATCACCTGAGGTAAGGAGTTCGAGACCAGCCTGACCAACGTGGAGAAACCCCATCTCTCCTAAA	030	regLM	64	-0.0459054	1.97424	3.08476	0.279628	1.97422	0.986932
gen_432	TCTCTGCTCCCCGGAGTCCCTGCACGTGGCTTGACAGTGGCCTTGGTAGGACCCACTGGGGTGTTTCTTCGTCGCCCATGGGCCCTCATGCTGTTATCAGTTGGAAATGAATCAGAGATTAGGAAGCGGGGGGAGTGGTGGGGGTGTTATCGCCCAGTGCACACGGGGCTCTCAGCTAATCTCTGGCGGCCCTGGGTTGG	030	regLM	2	0.754523	5.72762	-0.203614	0.890888	5.72763	0.102848
gen_433	GTTTAGCGTAAGAATCAGGGTCCAGCTGGTGCTCCCTAAACAGCAGCTGCTGTTCACTGTTGAAAGGCGCTCTGGAAGGCCAGGTGCGGTGGCTCATGCTTGTAATCACAGCACTTTGGGAGGCCGAGGTGGGCGGATCACCTGAGGTAAGGAGTTCGAGACCAGCCTGACCAACGTGGAGAAACCCCATCTCTCCTAAA	030	regLM	62	-0.0131441	2.18955	3.71453	0.12974	2.18955	1.1563
gen_434	GTTTAGCGTAAGAATCAGGGTCCAGCTGGTGCTCCCTAAACAGCAGCTGCTGTTCACTGTTGAAAGGCGCTCTGGAAGGCCAGGTGCGGTGGCTCATGCTTGTAATCCCAGCACTGTGGGAGGCCGAGGTGGGCGGATCACCTGAGGTAAGGAGTTCGAGACCAGCCTGACCAACGTGGAGAAACCCCATCTCTACTAAG	030	regLM	62	0.134578	2.56549	3.25454	0.352394	2.56544	0.841335
gen_435	ACTGGGATTGCTTGGTTGAATGGTAGTTCCATTTTTAGTTCTTTGAGAAATCTCCAAACTGCTTTCCACAGCAGCTTAACTAATTTACATTCCCACCAGCACTGTCTTAAGTGTTTCCTTTTCTCCACAGCCTTGCCAGCATCTGTAATTTTTTGACTTTTTAATGATATTCTTTATGACTGGTGCAAGATGGTATCTCA	030	regLM	50	0.103915	0.905605	0.642683	0.289973	0.905523	0.0522461
gen_436	CTCAGAATTAATGGAGAGGGCCAGTGGCGGCCTGTGCCCTTTGTCCCACTGGCCGGCCTGGGGGTGGCGGCTCCAGAATACAGGGTCCTATTGTGTGCCCTGATGTCAGGCAGCTGGACTGCTGGGAGTGAGGATAAACAAGCAGCTGGAGCATCTCGCCTGAAGCCCCAGGAGAGGGCCAGAGCCCCTGCTGCAGGAGG	030	regLM	98	2.9321	0.027809	1.36818	2.29545	0.0278099	1.22972
gen_437	CTGTTTGTGCTGTGTGTTTCCAATAATTGACAACATATGTGATTTTGTTATTCTACACTGAGCTTGCTTCGTCTGCATATTCATTAAAAAAGAATTTTTAAAATCTTTGTCAGATGTTCTACATCTGAATCATCTTCTAGTATTAAACCACAGCCAAGAACTTTTATATCTTTTATCACATTAATGTAAAGATTCATGGA	030	regLM	94	-0.286718	-0.715641	3.38295	0.351996	-0.715684	1.53512
gen_438	CCAGTAATGGGATGGCTGGGTCCAATGGTATTTCTAGTTCTAGATCCCTGAGGAATCGCCACACTGACTTCCACAATGGTTGAACTAGTTTACAGTCCCGCCAACAGTGTAAAATTATTCCTATTTCTCCACATCCTCTCCAGCACCTGTTGTTTCCTGACTTTTTAATGATTGCCATTCTAACTGGTGTGAGATGGTAT	030	regLM	5	-0.610789	-0.0835545	-0.576783	-0.225336	-0.0835739	-0.548058
gen_439	TCTCTGCTCCCCAGAGTCCCTGCACGTGGCTTGACAGTGGCCTTGGTAGGACCCACTGGGGTGTTTCTTCGTCGCCCATGGGCCCTCATGCTGTTATCAATTGGAAATGAATCAGAGATTAGGAAGCGGGGGGAGTGGTGGGGGTGTTATCGCCCAGTGCACACGGGGCTCTCAGCTAATCTCTGGCGGCCCTGGGTGAT	030	regLM	3	-0.00909403	5.35969	-0.227811	0.210729	5.35973	0.0843473
gen_440	TCTCTGCTCCCCGGAGTCCCTGCACGTGGCTTGACAGTGGCCTTGGTAGGACCCACTGGGGTGTTTCTTCGTCGCCCATGGGCCCTCATGCTGTTATCAGTTGGAAATGAATCAGAGATTAGGAAGCGGGGGGAGTGGTGGGGGTGTTATCGCCCAGTGCACACAGGTTACCACAGACATTTAGCCCTCTGAGGCCCTTT	030	regLM	21	0.901091	5.11645	-0.447134	0.578112	5.11634	-0.148652
gen_441	CCTGAGAAAGGCTTCAACTAAAGAGCTATGGACAGGGACACTCTGTCACTTCCTGGGATTTTGACCCCCAGCTGTCCAACAGAGGAGGGTCTGTGCCTTTGCTCATTAGTCCATTTTACAATTCTTTTTATTATACTTTAAGTTCTACGAGGCATGCGCAGGCTTATTGCGAAGGGGAATCTAGCTTATTTATTTATTTA	030	regLM	53	1.19739	1.33625	1.76479	1.08139	1.33622	1.86945
gen_442	GTTTAGCGTAAGAATCAGGGTCCAGCTGGTGCTCCCTAAACAGCAGCTGCTGTTCACTGTTGAAAGGCGCTCTGGAAGGCCAGGTGCGGTGGCTCATGCTTGTAATTCCAGCACTGTGGGAGGCCGAGGTGGGCGGATCACCTGAGGTAAGGAGTTCAAGACCAGCCTGACCAACGTGGAGAAACCCCATCTCTCCTAAA	030	regLM	62	0.151838	1.95907	2.05841	0.412091	1.95908	-0.0406616
gen_443	GTTTAGCGTAAGAATCAGGGTCCAGCTGGTGCTCCCTAAACAGCAGCTGCTGTTCACTGTTGAAAGGCGCTCTGGAAGGCCAGGCGCGGTGGCTCATGCTTGTAATCCCAGCACTGTGGGAGGCCGAGGTGGGCGGATCACCTGAGGTAGGGAGTTCAAGACCAGCCTGACCAACGTGGAGAAACCCCATCTCTCCTAAA	030	regLM	63	0.369712	2.54693	3.50662	0.603443	2.54689	1.31146
gen_444	AGAATTGGAAGGAGCTTAGGGGAAAGCTAGCCTCAGGTCAGAATTGCCTGCATGCCACTCGGCTAGTGAGCTGCTGAATCACCTTATTCCTGGAGAAAGATTTTGTTTTTTATTTTATTTTATTTTATTTTATTTTATTTTATTTTATTTTATTTTATTTTATTTTATTTTATTTTATTTTATTTAATTTAATTTAAAAT	030	regLM	95	0.316735	0.268142	0.640454	0.231996	0.268179	0.93484
gen_445	CCAGTAATGGGATGGCTGGGTCCAATGGTATTTCTAGTTCTAGATCCCTGAGGAATTGCCACACTGACTTCCACAATGGTTGAACTAGTTTACAGTCCCACCAACAGCGTAAAAGTGTTCCTATTTCTCCACATCCTCTCCAGCACCTGTTGTTTCCTGACTTTTTAATGATCGCCATTCTAACTGGTGTGAGATGGTAT	030	regLM	8	-0.356143	0.262476	-0.420789	-0.0330398	0.262559	-0.458511
gen_446	CTGGCTGTTTCCTGACTTTTTAATGATCGCCATTCTAACTGGTGGGAGATGGTATCTCATTGTGGTTTTGATTTGCATTTCTCTGATGGCCAGTGATGATGAGCATTTTTTCATGTGTCTCTTGGCTGCATAAATGTCTTCTTTTGAGAAGTGTCTGTTCATATCCTTTGCCCACTTTTTGATGGGGTTGTTTGTTTTTT	030	regLM	19	-0.295824	-0.0119257	0.0572127	-0.112437	-0.0119191	-0.316519
gen_447	TCTCTGCTCCCCAGAGTCCCTGCACGTGGCTTGACAGTGGCCTTGGTAGGACCCACTGGGGTGTTTCTTCGTCGCCCATGGGCCCTCATGCTGTTATCAGTTGGAAATGAATCAGAGATTAGGAAGCGGGGGGAGTGGTGGGGGTGTTATCGCCCAGTGCACACAGGTTACCACAGACATTTAGCCCTCACTGGAAATAG	030	regLM	21	0.808009	5.12679	-0.577002	0.455353	5.12681	-0.220939
gen_448	GATTTTTCTACTGCTAGGTTTTCCTTTTGGGGTTACGATTATTACAGGTGGCAATCAGTTAACTTAGTGGTTCTGTAGGCACCGCCCTATCTTCCAACTCACTTACATTTAAAAATTCACACAGAGAGGCTAGTGGGAAGCGGGTAGGTGTAAACAATGTGCTACAGTGAGAATCCAGGGGCCTCTCTGGGGGGGGGGGG	030	regLM	101	1.02972	2.02473	0.14255	0.849068	2.02455	0.439924
gen_449	TCTCTGCTCCCCAGAGTCCCTGCACGTGGCTTGACAGTGGCCTTGGTAGGACCCACTGGGGTGTTTCTTCGTCGCCCATGGGCCCTCATGCTGTTATCAATTGGAAATGAATCAGAGATTAGGAAGCGGGGGGAGTGGTGGGGGTGTTATCGCCCAGTGCACACAGGTTACCACAGACATTTAGCCCTCACTGCAGCGTG	030	regLM	21	0.247751	4.61333	-0.549139	0.0769107	4.61332	-0.237555
gen_450	CTCAGAATTAATGGAGAGGGCCAGTGGCGGCCTGTGCCCTTTGTCCCACCGGCCGGCCTGGGGGTGGCGGCTCCAGAATACAGGGTCCTATTGTGTGCCCTGATGTCAGGCAGCTGGACTGCTGGGAGTGAGGATAAACAAGCAGCTGGAGCATCTCGCCTGAAGCCCCAGGAGAGGGCCAGAGCCCCTGAAGAGTGGGG	030	regLM	100	2.87182	-0.027626	1.15159	2.2222	-0.0276096	1.10582
gen_451	CTCTCTATTACATTCCATTCTCCATTCCATTCCATTCTCCATTCCATTCCATTCTCCATTCCATTCCACTCCATTCTCCATTCCATTCCATTCTCCATTAAATTCCATTCTCCATTACATTCCATTCTCCATTACATTCCATTCTCCATTACATTCCATTCTCCATTACATTCCATTCTCCATTCCATTCCCCTTTCCAT	030	regLM	90	-0.449313	-0.176165	4.04401	-0.143553	-0.17624	0.531453
gen_452	CCTGAGAAAGGCTTCAACTAAAGAGCTATGGACAGGGACACTCTGTCACTTCCTGGGATTTTGACCCCCAGCTGTCCAACAGAGGAGGGTCTGTGCCTTCGCTCATTAGCCTAACTTAGATGATAGGTGACAAACTGAAATGAGCTATAAGAACTGGTTTTTTATTTTATTTTATTTTATTTTATTTTATTTTATTTTAT	030	regLM	35	0.338557	0.246526	0.0457029	0.131901	0.246522	0.33101
gen_453	TCTCACCACTCCTATTCAACATAGTGTTGGAAGTTCTGGACAGGGCAATCAGGCAAGAGAAAGAAAGAAAGAAAGAAAGAAAGAAAGAAAGAAAGAAAGAAAGAAAGAAAGAAAGAAAGAAAGAAAGAAAGAAAGAAAGAAAGAAAGAAAGAAAGAAAGAAAGAAAGAAAGAAAGAAAGAAAGAAAGAAAGAAAGAAAGA	030	regLM	74	-0.178208	0.265534	0.421669	-0.156156	0.265537	-0.124201
gen_454	ATTATGATACAGTCCAAGTATGTAACTTTCTGGGGACCAGACTTTGCTGAGAGTCATAATGGAGAGTCAAAGAGTCTGATGGCTGAGAGGGATGTGCCTGGGCTTGCCTTCATAAATGTTCATTGTCTCAGCCAAGGTTTTGGCAGGAGCGAGAACAGCCTCTGGTAGGAGCTGGGGTCACAGGAGGCAATGTCAGTTAG	030	regLM	97	2.10226	0.116891	5.97552	2.49645	0.11686	4.3498
gen_455	GTTTAGCGTAAGAATCAGGGTCCAGCTGGTGCTCCCTAAACAGCAGCTGCTGTTCACTGTTGAAAGGCGCTCTGGAAGGCCAGGTGCGGTGGCTCATGCTTGTAATCCCAGCACTGTGGGAGGCCGAGGTGGGTGGATCACCTGAGGTAAGGAGTTCGAGACCAGCCTGACCAACGTGGAGAAACCCCATCTCTCCTAAA	030	regLM	61	0.00512589	2.50069	3.35939	0.088879	2.50055	0.650105
gen_456	CTCAGAATTAATGGAGAGGGCCAGTGGCGGCCTGTGCCCTTTGTCCCACCGGCCGGCCTGGGGGTGGCGGCTCCAGAATACAGGGTCCTATTGTGTGCGCTGATGTCAGGCAGCTGGACTGCTGGGAGTGAGGATAAACAAGCAGCTGGAGCATCTCGCCTGAAGCCCCAGGAGAGGGCCAGAGCCCCTGCAGCAGCCAG	030	regLM	97	3.67742	0.297115	1.78194	2.30528	0.297166	1.49602
gen_457	ACTGGGATTGCTTGGTTGAATGGTAGTTCCATTTTTAGTTCTTTGAGAAATCTCCAAACTGCTTTCCACAGCAGCTTAACTAATTTACATTCCCACCAGCACTGTCTTAAGTGTTTCCTTTTCTCCGCAGCCTTGCCAACATCTGTAATTTTTTGACTTTTTAATGATATTCTTTATGACTGGTGCAAGATGGTACCTCA	030	regLM	53	-0.0120285	0.222795	0.522924	0.226193	0.222837	0.377426
gen_458	GTTTAGCGTAAGAATCAGGGTCCAGCTGGTGCTCCCTAAACAGCAGCTGCTGTTCACTGTTGAAAGGCGCTCTGGAAGGCCAGGCGCGGTGGCTCATGCTTGTAATCCCAGCACTGTGGGAGGCCGAGGTGGGCGGATCACCTGAGGTAAGGAGTTCGAGACCAGCCTGACCAACGTGGAGAAACCCCATCTCTACTAAA	030	regLM	63	0.347658	3.01377	4.26055	0.682899	3.01362	1.92267
gen_459	TCTCTGCTCCCCAGAGTCCCTGCACGTGGCTTGACAGTGGCCTTGGTAGGACCCACTGGGGTGTTTCTTCGTCGCCCATGGGCCCTCATGCTGTTATCAGTTGGAAATGAATCAGAGATTAGGAAGCGGGGGGAGTGGTGGGGGTGTTATCGCCCAGTGCACACAGGTTACCACAGAGGTCAGAAGGCAACCTGGAGCAG	030	regLM	20	0.793417	4.78241	-0.614622	0.524267	4.78239	-0.629586
gen_460	CTCAGAATTAATGGAGAGGGCCAGTGGCGGCCTGTGCCCTTTGTCCCACTGGCCGGCCTGGGGGTGGCGGCTCCAGAATACAGGGTCCTATCGTGTGCCCTGATGTCAGGCAGCTGGACTGCTGGGAGTGAGGATAAACAAGCAGCTGGAGCATCTCGCCTGAAGCCCCAGGAGAGGGCCAGAGCCCCTGCAGCAGCAGC	030	regLM	96	1.00121	0.21368	0.868732	1.42322	0.213672	0.62911
gen_461	AGAAAAAAACAAACAACCCCATCAACAAGTGGGCGAAGGATATGAACAGACACTTCTCAAAAGAAGATATTTATTCAACCAAAAGACACATGAAAAAATGCTCATCATCACTGGCCATCAGAGAAATGCAAATCAAAACCACAATGAGATACCATCTCACACCAGTTAGAATGGCGATCATTAAAAAGTCAGGAAACCAC	030	regLM	44	-0.496225	0.649119	-0.0141612	-0.193449	0.649367	-0.339787
gen_462	CCTCAGAATTAATGGAGAGGGCCAGTGGCGGCCTGTGCCCTTTGTCCCACCGGCCGGCCTGGGGGTGGCGGCTCCAGAATACAGGGTCCTATTGTGTGCCCTGATGTCAGGCAGCTGGACTGCTGGGAGTGAGGATAAACAAGCAGCTGGAGCATCTCGCCTGAAGCCCCAGGAGAGGGCCAGAGCCCCTGCAGCGTGAG	030	regLM	98	3.10302	0.115097	1.40144	2.28035	0.115088	1.40148
gen_463	GAGAAATTCTCAAGGAGGAGGACACAAACAGGACTGGAAGGGGAGCAGGACTGAGCCAAGCGGATGAGAGGAAAGAGGCATTCCAGTCCTCTGGGGAAGCATGGGAGGTAGGAATTCTTGCCACCAGTGGTTTGGACAAACACACAGAGCGGGTCACCGGGTCAGAGCCGAGGGTTAGGACGGGAGAGGAGCAAAGGTCC	030	regLM	99	3.4336	0.457843	0.37476	1.87094	0.457865	0.335351
gen_464	GTTTAGCGTAAGAATCAGGGTCCAGCTGGTGCTCCCTAAACAGCAGCTGCTGTTCACTGTTGAAAGGCGCTCTGGAAGGCCAGGCGCGGTGGCTCATGCTTGTAATCCCAGCATTTTGGGAGGCCGAGGTGGGCGGATCACCTGAGGTAAGGAGTTCGAGACCAGCCTGACCAACGTGGAGAAACCCCATCTCTCCTAAA	030	regLM	63	0.0696222	3.28451	3.90738	0.31601	3.2845	1.758
gen_465	GATTTTTCTACTGCTAGGTTTTCCTTTTGGGGTTACGATTATTACAGGTGGCAATCAGTTAACTTAGTGGTTCTGTAGGCACCGCCCTATCTTCCAACTCACTTACATTTAAAAATTCACACAGAGAGGCTAGTGGGAAGCGGGTAGGTGTAAACAATGTGCTACAGTGAGAAACCTGGGGTTTTTCTTGGAGCTAGAAG	030	regLM	101	0.488206	1.60424	0.15897	0.2653	1.60446	0.288928
gen_466	GATTTTTCTACTGCTAGGTTTTCCTTTTGGGGTTACGATTATTACAGGTGGCAATCAGTTAACTTAGTGGTTCTGTAGGCACCGCCCTATCTTCCAACTCACTTACATTTAAAAATTCACACAGAGAGGCTAGTGGGAAGCGGGTAGGTGTAAACAATGTGCTACAGTGAGAATGAATGGAGAGCCTCCAGGGGGCAGTA	030	regLM	100	2.06022	4.22235	0.634739	1.645	4.22248	1.42193
gen_467	CATGTTGCCTATGGTATTATAAGAATTGAAAGAAGGCCAGGCGCAGTGGCTCACACCTGTAATCCCAGCACTTTGGGAGGCTGAGGCGGGCAGATCACTTGAGGTCAGCAGTTCGAGACCAGCCTGGCCAACATGGTGAAACCCCATCTCTACTAAAAATACAAAAATTAGCCAGGCATGGTGGTGCATGCCTGTAATCC	030	regLM	43	-0.158687	3.60786	3.02391	0.102745	3.60768	1.3476
gen_468	TCTCTGCTCCCCAGAGTCCCTGCACGTGGCTTGACAGTGGCCTTGGTAGGACCCACTGGGGTGTTTCTTCGTCGCCCATGGGCCCTCATGCTGTTATCAGTTGGAAATGAATCAGAGATTAGGAAGCGGGGGGAGTGGTGGGGGTGTTATCGCCCAGTGCACACAGGGTCCCATTCGTTCAGGTCAATGGCCGGTGAAGA	030	regLM	21	0.678389	5.10775	-0.562402	0.267884	5.10779	-0.267342
gen_469	GATGGGTGCCTCTCCATGGAGCTCACATGTCATACTGCGCCCTGACTCATCACATGTCATTGTTCCTTTGTATTAATTTTCTGTCATCTACAGTGAGTTCCTTGAGGGCAGGGAAAGGGCTTTTTATCTCTGCATTACCAGAGCCCAACAGATACACACTGGTTCTTATCCATCCACCCATTCATCCAACAAACATTTGC	030	regLM	3	-0.220993	6.24301	0.265938	-0.00101416	6.24291	0.00992926
gen_470	CTAGCTGTACCAGCCGCTGCCCCGGACCTGCTGCCCTGCCCCACGCACCCCCCCTCCCCTGGCCAGCCTCCCCAGAGGCCAGAAGGCGCCTTATCGGGCAGGGTTAAGGAGGGGGACAGTTATCAGGGGCTGCAGCCTAGGTTGGGCCACAATGTCCTCGTCTCTTGAGGGTGGCAGGCTGTGCAGGCTCCCTGATAAAA	030	regLM	7	0.281527	5.534	0.455715	0.556825	5.53401	0.563018
gen_471	GTTTAGCGTAAGAATCAGGGTCCAGCTGGTGCTCCCTAAACAGCAGCTGCTGTTCACTGTTGAAAGGCGCTCTGGAAGGCCAGGTGCGGTGGCTCATGCTTGTAATCCCAGCACTGTGGGAGGCCGAGATGGGCGGATCACCTGAGGTAAGGAGTTCGAGACCAGCCTGACCAACGTGGAGAAACCCCATCTCTCCTAAA	030	regLM	63	0.0520496	2.3904	3.44821	0.204504	2.3904	0.88739
gen_472	TCCTGAATGGGCAAAAACTGGAAGCATTCCCTTTGAAAACTGGCACAAGACGGGGATGCCCTCTCTCACCGCTCCTATTCAACATAGTGTTGGAAGTTCTGGCCAGGGCAATCAGGCAGGAGAAATAAATAAAGGGTATTCAATTAGGAAAAGAGGAAGTCAAATTGTCCCTGTTTGCAGATGACATGATTGTATATCTA	030	regLM	19	-0.165872	0.370033	-0.542638	0.307145	0.370045	-0.206656
gen_473	ATTAGCATGGAATTTGGACTTTGGAGCCATAATCCTGTTGTCTTCTTTCATTTAAAGAATATGGGCCGGGCGCGGTGGCTCACGCCTGTAATCCCAGCACTTTGGGAGGCCGAGGCGGGTGGATCACGAGGTCAGGAGATCGAGACCATCCTGGCTAACACGGTGAAAGCCTGTCTCTACTAAAAATACAAAAAATTAGC	030	regLM	57	0.347907	3.30805	2.10206	1.35953	3.30808	2.5337
gen_474	CCAGTAATGGGATGGCTGGGTCCAATGGTATTTCTAGTTCTAGATCCCTGAGGAATTGCCACACTGACTTCCACAATGGTTGAACTAGTTTACAGTCCCACCAACAGTGTAAAATTATTCCTATTTCTCCACATCCTCTCCAGCACCTGTTGTTTCCTGCCTTTTTTGTTTGTTTTTTTGTTTTTTGTAGAGACAGGGTT	030	regLM	22	0.104263	1.72474	-0.141425	0.435846	1.72469	-0.00748162
gen_475	ATTAGCATGGAATTTGGACTTTGGAGCCATAATCCTGTTGTCTTCTTTCATTTAAAGAATATGGGCCGGGCGCGGTGGCTCACGCCTGTAATCCCAGCACTTTGGGAGGCCGAGGCGGGTGGATCATGAGGTCAGGAGATCGAGACCATCCTGGCTAACACAGTGAAACCCTGTCTCTACTAAAAATACAAAAAAATTAG	030	regLM	57	0.281306	3.28133	1.75237	1.09538	3.28155	1.72027
gen_476	CCTAGAGACTCTGGGCACCACTGATAAGGGTGGGTACCAGGAACTCCACCCTTTACCGAGAAAGGCAGGCTGGTTTATCGCCACTCAGACCCAGCCAGCGACCACCCTGGGGAGTGTGTCAGCCACCAGGAGCATCGCTGTTGGGGAAATGTTATTAACTAGGAAGGTTTTTGCCTCTGGCAGGTCAGTTGGCCACCAGG	030	regLM	21	-0.0197534	6.02084	-0.0820436	0.000726223	6.02074	1.16536
gen_477	GATTTTTCTACTGCTAGGTTTTCCTTTTGGGGTTACGATTATTACAGGTGGCAATCAGTTAACTTAGTGGTTCTGTAGGCACCGCCCTATCTTCCAACTCACTTACATTTAAAAATTCACACAGAGAGGCTAGTGGGAAGCGGGTAGGTGTAAACAATGTGCTACAGTGAGAAACCCGGGACATTTTCCAAGAGCATGTA	030	regLM	101	0.459197	1.25973	0.0709553	0.108197	1.25967	0.240071
gen_478	GTTTAGCGTAAGAATCAGGGTCCAGCTGGTGCTCCCTAAACAGCAGCTGCTGTTCACTGTTGAAAGGCGCTCTGGAAGGCCAGGCGCGGTGGCTCATGCTTGTAATCCCAGCACTGTGGGAGGCCGAGATGGGTGGATCACCTGAGGTAAGGAGTTCGAGACCAGCCTGACCAACGTGGAGAAACCCCATCTCTCCTAAA	030	regLM	63	0.0907477	2.79573	3.80084	0.247046	2.79583	1.65896
gen_479	AAACAAATTTATAAGAAAAAACAAACAACCCCATCAAAAAGTGGGTGAAGGATATGAACAGACACTTCTCAAAAGAAGATATTTATGCAGCCAACAAACATATGAAAAATTGCTCATCATTACTGGCCATCAGAGAAATGCAAATCAAAACCACAATGAGATACCATCTCACACCAGTTAGAATGGCGATCATTAAAAAG	030	regLM	18	-0.509829	1.3683	-0.150875	-0.232943	1.36848	-0.37105
gen_480	CCAGTAATGGGATGGCTGGGTCCAATGGTATTTCTAGTTCTAGATCCCTGAGGAATTGCCACACTGACTTCCACAATGGTTGAACTAGTTTACAGTCCCGCCAACAGTGTATAAGTGTTCCTATTTCTCCACATCCTCTCCAGCACCTGTTGTTTCCTGACTTTTTAATGATTGCCATTCTAACTGGTGTGAGATGGTAT	030	regLM	9	-0.517546	0.386344	-0.543174	-0.126063	0.386466	-0.591819
gen_481	GTTTAGCGTAAGAATCAGGGTCCAGCTGGTGCTCCCTAAACAGCAGCTGCTGTTCACTGTTGAAAGGCGCTCTGGAAGGCCAGGTGCGGTGGCTCATGCTTGTAATCCCAGCACTGTGGGAGACCGAGGTGGGCGGATCACCTGAGGTAAGGAGTTCGAGACCAGCCTGACCAACGTGGAGAAACCCCATCTCTCCTAAA	030	regLM	63	0.0268083	2.35593	3.29332	0.110184	2.35587	0.23365
gen_482	TCTCTGCTCCCCAGAGTCCCTGCACGTGGCTTGACAGTGGCCTTGGTAGGACCCACTGGGGTGTTTCTTCGTCGCCCATGGGCCCTCATGCTGTTATCAGTTGGAAATGAATCAGAGATTAGGAAGCGGGGGGAGTGGTGGGGGTGTTATCGCCCAGTGCACACAGGTTACCACAGACATTTAGCCCTCACAGGAACCTG	030	regLM	22	0.940112	5.11847	-0.616616	0.603174	5.11846	-0.27785
gen_483	CCCGAATACTGTGCTTTTCCGACGGGCTTAGGAAACGGCACACCAGGATATTATATCCTGCACCTGGCTCGGAGGGTCCTACGTGCACGGAGTCTCGCTCATTGCTAGCACAGAAGTCTGAGATCAAACTGCAAGGCGGCAGCGAGGCTGGGGGAGGGGTGCCCGCCATTGCCCAGGCTTGCTTTGGGATGTCGGTAATC	030	regLM	96	0.571959	-0.121354	1.28743	1.35087	-0.121299	0.235571
gen_484	GTTTAGCGTAAGAATCAGGGTCCAGCTGGTGCTCCCTAAACAGCAGCTGCTGTTCACTGTTGAAAGGCGCTCTGGAAGGCCAGGTGCGGTGGCTCATGCTTGTAATCCCAGCACTGTGGGAGGCCGAGGTGGGCGGATCCCCTGAGGTAAGGAGTTCGAGACCAGCCTGACCAACGTGGAGAAACCCCATCTCTCCTAAA	030	regLM	63	0.249695	2.67965	3.62534	0.484738	2.67957	0.90068
gen_485	GATTTTTCTACTGCTAGGTTTTCCTTTTGGGGTTACGATTATTACAGGTGGCAATCAGTTAACTTAGTGGTTCTGTAGGCACCGCCCTATCTTCCAACTCACTTACATTTAAAAATTCACACAGAGAGGCTAGTGGGAAGCGGGTAGGTGTAAACAATGTGCTACAGTGAGAAAGATGCTGCCAGTTACCAAAGTCAAAT	030	regLM	100	0.170089	0.625565	0.111528	-0.00463649	0.625545	0.0912947
gen_486	CTAGCTGTACCAGCCGCTGCCCCGGACCTGCTGCCCTGCCCCACCCCCCCCTCCCCTGGCCAGCCTCCCCAGAGGCCAGAAGGCGCCTTATCGGGCAGGGTTAAGGAGGGGGACAGTTATCAGGGGCTGCAGCCTAGATTGGGCCACAATGTCCTCGTCTCTTGAGGGTGGCAGGCTGTGCAGGCTCCCTGACAGGCAGG	030	regLM	8	0.513495	4.69493	0.764367	0.289387	4.69495	0.719451
gen_487	CCATCTGTTCCATCCTCACCCACCCAAGGAGCCGCCCCTGCTCCTAGAGACTCTGGGCACCACTGATAAGGGTGGGTACCAGGAACTCCACCCTTTACCAAGAAAGGCAGGCTGGTTTATCGCCACTCAGACCCAGCCAGCAACCACCCTGGGGAGTGTGTCAGCCACCAGGAGCATCGCTGTTGGGGAAATGTTATCTC	030	regLM	84	0.518375	7.77592	0.440514	0.165209	7.77592	1.54266
gen_488	AGAATTGGAAGGAGCTTAGGGGAAAGCTAGCCTCAGGTCAGAATTGCCTGCATGCCACTCGGCTAGTGAGCTGCTGAATCACCTTATTCCTGGAGAAAGATTTTGTTTTTTATTTTATTTTATTTTATTTTATTTTATTTTATTTTATTTTATTTTATTTTACTTTATTATTATTATTATTATTATTATTATTATTATTA	030	regLM	93	0.113756	0.289862	0.378665	0.0754772	0.289825	0.538166
gen_489	TCTCTGCTCCCCAGAGTCCCTGCACGTGGCTTGACAGTGGCCTTGGTAGGACCCACTGGGGTGTTTCTTCGTCGCCCATGGGCCCTCATGCTGTTATCAGTTGGAAATGAATCAGAGATTAGGAAGCGGGGGGAGTGGTGGGGGTGTTATCGCCCAGTGCACACAGGTTACCACAGATGGAATAAGGGAAGCCAAGCAGG	030	regLM	23	0.718997	4.97144	-0.56807	0.214747	4.97147	-0.295617
gen_490	TCTCTGCTCCCCGGAGTCCCTGCACGTGGCTTGACAGTGGCCTTGGTAGGACCCACTGGGGTGTTTCTTCGTCGCCCATGGGCCCTCATGCTGTTATCAGTTGGAAATGAATCAGAGATTAGGAAGCGGGGGGAGTGGTGGGGGTGTTATCGCCCAGTGCACACAGGTTACCACAGATGGAATGAGGGAATGTGGAAACT	030	regLM	23	0.987882	4.04275	-0.779079	0.371918	4.04256	-0.388962
gen_491	TCTCTGCTCCCCAGAGTCCCTGCACGTGGCTTGACAGTGGCCTTGGTAGGACCCACTGGGGTGTTTCTTCGTCGCCCATGGGCCCTCATGCTGTTATCAATTGGAAATGAATCAGAGATTAGGAAGCGGGGGGAGTGGTGGGGGTGTTATCGCCCAGTGCACACAGGTTACCACAGACGTTTAACAGCAGCAGGGCTGGG	030	regLM	20	0.469179	5.02298	-0.582994	0.144001	5.02304	-0.11219
gen_492	AACAAAAAAACAAACAACCCCATCAACAAGTGGGCGAAGGATATGAACAGACACTTCTCAAAAGAAGATATTTATTCAACCAAAAGACACATGAAAAAATGCTCATCATCACTGGCCATCAGAGAAATGCAAATCAAAACCACAATGAGATACCATCTCACACCAGTTAGAATGGCGATCATTAAAAAGTCAGGAAACCA	030	regLM	41	-0.487659	0.609482	0.0243481	-0.189019	0.609446	-0.342001
gen_493	CTCAGAATTAATGGAGAGGGCCAGTGGCGGCCTGTGCCCTTTGTCCCACCGGCCGGCCTGGGGGTGGCGGCTCCAGAATACAGGGTCCTATTGTGTGCGCTGATGTCAGGCAGCTGGACTGCTGGGAGTGAGGATAAACAAGCAGCTGGAGCATCTCGCCTGAAGCCCCAGGAGAGGGCCAGAGCCCCCACTGCCCTCTG	030	regLM	97	3.74255	0.234672	1.53465	2.51928	0.234739	1.31939
gen_494	CTCAGAATTAATGGAGAGGGCCAGTGGCGGCCTGTGCCCTTTGTCCCACTGGCCGGCCTGGGGGTGGCGGCTCCAGAATACAGGGTCCTATTGTGTGCCCTGATGTCAGGCAGCTGGACTGCTGGGAGTGAGGATAAACAAGCAGCTGGAGCATCTCGCCTGAAGCCCCAGGAGAGGGCCAGAGCCCCTACAGCTTGTGT	030	regLM	98	2.72408	0.0711216	1.31556	2.35751	0.0711186	1.1928
gen_495	GATTTTTCTACTGCTAGGTTTTCCTTTTGGGGTTACGATTATTACAGGTGGCAATCAGTTAACTTAGTGGTTCTGTAGGCACCGCCCTATCTTCCAACTCACTTACATTTAAAAATTCACACAGAGAGGCTAGTGGGAAGCTGTATTCAGAAATCTAGAGGCTAGAAAAGTTCATACAGGGGGCCAAGCGGAGAACATCA	030	regLM	98	0.188588	0.831001	0.0537113	0.109528	0.83109	-0.0723655
gen_496	CTCAGAATTAATGGAGAGGGCCAGTGGCGGCCTGTGCCCTTTGTCCCACTGGCCGGCCTGGGGGTGGCGGCTCCAGAATACAGGGTCCTATTGTGTGCCCTGATGTCAGGCAGCTGGACTGCTGGGAGTGAGGATAAACAAGCAGCTGGAGCATCTCGCCTGAAGCCCCAGGAGAGGGCCAGAGCCCCTGAAGAGTGAGG	030	regLM	99	2.79547	0.0686309	1.36723	2.26569	0.0686525	1.2306
gen_497	CCTGAGAAAGGCTTCAACTAAAGAGCTATGGACAGGGACACTCTGTCACTTCCTGGGATTTTGACCCCCAGCTGTCCAACAGAGGAGGGTCTGTGCCTTCGCTCATTAGCCTAACTTAGATGATAGGTGACAAACTGAAGTGAGCTATGGGGAGAGGTTGCCACAACCTCAGCTTTCCAGAGGTGGGGCCCTGGCTTGGC	030	regLM	26	0.506225	0.721512	-0.350496	-0.0531433	0.721489	-0.281866
gen_498	GTTTAGCGTAAGAATCAGGGTCCAGCTGGTGCTCCCTAAACAGCAGCTGCTGTTCACTGTTGAAAGGCGCTCTGGAAGGCCAGGTGCGGTGGCTCATACTTGTAATCCCAGCACTGTGGGAGGCCGAGGTGGGCGGATCACCTGAGGTAAGGAGTTCGAGACCAGCCTGACCAACGTGGAGAAACCCCATCTCTCCTAAA	030	regLM	63	0.124482	2.31865	3.14036	0.284339	2.31875	0.676282
gen_499	CCTGAGAAAGGCTTCAACTAAAGAGCTATGGACAGGGACACTCTGTCACTTCCTGGGATTTTGACCCCCAGCTGTCCAACAGAGGAGGGTCTGTGCCTTCGCTCATTAGCCTAACTTAGATGATAGGTGACAAACTGAAGTGAGCTATAGGGAGTTGTCCACTTCCAGGCTGCTATCAGTACACCAGCTGCCTTGGCCAC	030	regLM	7	0.0256365	3.53016	-0.51033	-0.185313	3.53086	-0.782955
gen_500	TCTCTGCTCCCCAGAGTCCCTGCACGTGGCTTGACAGTGGCCTTGGTAGGACCCACTGGGGTGTTTCTTCGTCGCCCATGGGCCCTCATGCTGTTATCAGTTGGAAATGAATCAGAGATTAGGAAGCGGGGGGAGTGGTGGGGGTGTTATCGCCCAGTGCACACGGGGCTCTCAGCTAATCTCTGGCGGCCCTGGGTTTG	030	regLM	2	0.750459	5.74765	-0.225406	0.861907	5.74761	0.133042
gen_501	ACTGGGATTGCTTGGTTGAATGGTAGTTCCATTTTTAGTTCTTTGAGAAATCTCCAAACTGCTTTCCACAGCAGCTTAACTAATTTACATTCCCACCAGCACTGTCTTAAGTGTTTCCTTTTCTCCGCAGCCTTACCAGCATCTGTAATTTTTTGACTTTTTAATGATATTCTTTATGACTGGTGCAAGATGGTATCTCA	030	regLM	51	0.172919	0.879836	0.712516	0.377713	0.879757	0.862068
gen_502	GATGGGTGCCTCTCCATGGAGCTCACATGTCATACTGCGCCCTGACTCATCACATGTCATTGTTCCTTTGTATTAATTTTCTGTCATCTACAGTGAGTTCCTTGAGGGCAGGGAAAGGGCTTTTTATCTCTGCATTACCAGAGCCCAACAGATACACACTGGTTCTTATCCATCCACCCATTCATCCAATATTTGTTGGA	030	regLM	9	-0.34853	5.70663	-0.216338	-0.144691	5.70657	-0.421913
gen_503	AGAATTGGAAGGAGCTTAGGGGAAAGCTAGCCTCAGGTCAGAATTGCCTGCATGCCACTCGGCTAGTGAGCTGCTGAATCACCTTATTCCTGGAGAAAGATTTTGTTTTTTATTTTATTTTATTTTATTTTATTTTATTTTATTTTATTTTATTTTATTTTATTTTACTTTAAGATGAAGTCTCACTCTGTCACCCAGGC	030	regLM	99	0.205356	0.493576	0.76268	0.318826	0.49355	1.06608
gen_504	CATTCCATTCCATTCCATTCTGCATTCTGTTCCATTCTCCATTCCATTCCATTCTCCATACCATCCTCCATTCCATTACACTGCATTCCATTCTCCATTATATTTTATTCACCACGGCATTCCATTACATTTTCCATTCCATTCTATTCTCCATTCCATTCCATTCTCCATTCCATTCCCCTTTCCATTCCATTCCCCTT	030	regLM	93	-0.792703	-0.353358	3.67101	-0.328912	-0.353347	-0.788261
gen_505	GTTTAGCGTAAGAATCAGGGTCCAGCTGGTGCTCCCTAAACAGCAGCTGCTGTTCACTGTTGAAAGGCGCTCTGGAAGGCCAGGTGCGGTGGCTCATGCTTGTAATCCCAGCACTGTGGGAGGCCGAGGTGGGCGGATCACCTGAGGTAAGGAGTTCGAGACCAGCCTGATCAATATGGTGAAACCCCATCTCTCCTAAA	030	regLM	60	0.0736011	2.22151	2.67411	0.217439	2.22158	0.326972
gen_506	TCTCTGCTCCCCAGAGTCCCTGCACGTGGCTTGACAGTGGCCTTGGTAGGACCCACTGGGGTGTTTCTTCGTCGCCCATGGGCCCTCATGCTGTTATCAGTTGGAAATGAATCAGAGATTAGGAAGCGGGGGGAGTGGTGGGGGTGTTATCGCCCAGTGCACACGGGGCTCTCAGCTAATCTCTGGCGGGTCAGGGTCAG	030	regLM	6	0.828262	5.95674	-0.234937	1.02698	5.95675	-0.077124
gen_507	GTAAAATCCTCACAGCCATCTCTGACGCTGCTAACCACAGGCATTCAGGAACAGTCTTGCTCCAAATCCTGCCTCCTATTTTCATATTTCCTGTGGCGTTTTATAGAAATAGCAGAACAATTGCTCATCCACAGGGGGTAAAGGGAGCAGGATTTTATATAATTAAATTTTTTTTTTTTTTGAGACAGAGTCTTGCTCTG	030	regLM	101	1.52242	0.85361	5.59933	2.75859	0.853609	6.14312
gen_508	TCTCTGCTCCCCGGAGTCCCTGCACGTGGCTTGACAGTGGCCTTGGTAGGACCCACTGGGGTGTTTCTTCGTCGCCCATGGGCCCTCATGCTGTTATCAGTTGGAAATGAATCAGAGATTAGGAAGCGGGGGGAGTGGTGGGGGTGTTATCGCCCAGTGCACACGGGGCTCTCAGCTAATCTCTGGCGGCCCTGGGTAAG	030	regLM	3	0.745589	5.73978	-0.186882	0.864967	5.73985	0.148258
gen_509	ACAAAAAAACAAACAACCCCATCAACAAGTGGGCGAAGGATATGAACAGACACTTCTCAAAAGAAGATATTTATTCAACCAAAAGACACATGAAAAAATGCTCATCATCACTGGCCATCAGAGAAATGCAAATCAAAACCACAATGAGATACCATCTCACACCAGTTAGAATGGCGATCATTGAAAAGTCAGGAAGCAAC	030	regLM	44	-0.450581	1.06299	0.0725759	-0.159177	1.06289	-0.374237
gen_510	CCTGAGAAAGGCTTCAACTAAAGAGCTATGGACAGGGACACTCTGTCACTTCCTGGGATTTTGACCCCCAGCTGTCCAACAGAGGAGGGTCTGTGCCTTTGCTCATTAGCCTAACTTAGATGATAGGTGACAAACTGAAATGAGCTATAGGGAGTTGTCCACTTCCAGGCTGCTATCAGTGTGACAGAGGTTGGAAACCT	030	regLM	14	-0.0984704	1.13721	-0.786296	-0.170018	1.1371	-0.83504
gen_511	TCTCACCACTCCTATTCAACATAGTGTTGGAAGTTCTGGACAGGGCAATCAGGCAAGAGAAAGAAAGAAATAAAGGGTATTCAAATAGGAAGAGAGGAAGTCAAATTGTCCCTGTTTGCAGATGACATGATTGTATATCTGGAAAGTCCCATCGTCTCAGCCCAAAATCTCCTTAAGCTGATAAGCAACTTCAGCAAAGT	030	regLM	3	-0.397441	4.37464	-0.394212	0.0929568	4.37454	-0.137802
gen_512	CTCTCTATTACATTCCATTCTCCATTCCATTCCATTCTCCATTCCATTCCACTCCATTCTCCATTCCATTCCACTCCATTCTCCATTCCATTCCATTCTCCATTAAATTCCATTCTCCATTACATTCCATTCTCCATTACATTCCATTCTCCATTACATTCCATTCTCCATTACATTCCATTCTCCATTCCATTCCCCTT	030	regLM	88	-0.356193	-0.081027	4.13816	-0.0783577	-0.0809689	1.05507
gen_513	CATGTTGCCTATGGTATTATAAGAATTGAAAGAAGGCCAGGCGCAGTGGCTCACACCTGTAATCCCAGCACTTTGGGAGGCTGAGGCAGGCAGATCACTTGAGGTCAGGAGTTCGAGACCAGCCTGGCCAACATGGTGAAACCCCATCTCTACTAAAAATACAAAAATTAGCCAGGCATGGTGGTGCACACCTGTAATCC	030	regLM	43	-0.230544	3.61458	3.42132	-0.0209868	3.61332	1.30761
gen_514	GATTTTTCTACTGCTAGGTTTTCCTTTTGGGGTTACGATTATTACAGGTGGCAATCAGTTAACTTAGTGGTTCTGTAGGCACCGCCCTATCTTCCAACTCACTTACATTTAAAAATTCACACAGAGAGGCTAGTGGGAAGCGGGTAGGTGTAAACAATGTGCTACAGTGAGAAATAGTACAGCCACTCACCAGGAATGCA	030	regLM	99	0.875471	1.57424	0.160423	0.444102	1.57438	0.510267
gen_515	CCTGAGAAAGGCTTCAACTAAAGAGCTATGGACAGGGACACTCTGTCACTTCCTGGGATTTTGACCCCCAGCTGTCCAACAGAGGAGGGTCTGTGCCTTTGCTCATTAGCCTAACTTAGATGATAGGTGACAAACTGAAGTGAGCTATAGGGAGTTGTCCACTTCCAGGCTGCTATCAGTACACCAGCTGGCCTGCTGCA	030	regLM	5	0.114259	3.80142	-0.57394	-0.130839	3.80144	-0.756927
gen_516	GTTTAGCGTAAGAATCAGGGTCCAGCTGGTGCTCCCTAAACAGCAGCTGCTGTTCACTGTTGAAAGGCGCTCTGGAAGGCCAGGTGCGGTGGCTCATGCCTGTAATCCCAGCACTGTGGGAGGCCGAGGTGGGCGGATCACCTGAGGTAGGGAGTTCGAGACCAGCCTGACCAACGTGGAGAAACCCCATCTCTCCTAAA	030	regLM	62	0.0974315	2.62573	3.28893	0.306111	2.62575	0.798952
gen_517	AGAATTGGAAGGAGCTTAGGGGAAAGCTAGCCTCAGGTCAGAATTGCCTGCATGCCACTCGGCTAGTGAGCTGCTGAATCACCTTATTCCTGGAGAAAGATTTTGTTTTTTTCTTACAGATGCATTTGAGGCTGGGCATGGTGGCTCACGCCTGTAATCCCAGCACTTTGGGAGGCCGAGGTGGGTGGATCACCTGAGGT	030	regLM	92	0.328556	0.222674	0.149519	0.359177	0.222629	0.240237
gen_518	TCCTGAATGGGCAAAAACTGGAAGCATTCCCTTTGAAAACTGGCACAAGACGGGGATGCCCTCTCTCACCGCTCCTATTCAACATAGTGTTGGAAGTTCTGGCCAGGGCAATCAGGCAAGAGAAAGAAATAAAGGGTATTCAATTAGGAAAAGAGGAAGTCAAATTGTCCCTGTTTGCAGATGACATGACTGTATATTTA	030	regLM	21	-0.155667	0.175949	-0.438219	0.310248	0.175859	-0.112891
gen_519	TCTCTGCTCCCCAGAGTCCCTGCACGTGGCTTGACAGTGGCCTTGGTAGGACCCACTGGGGTGTTTCTTCGTCGCCCATGGGCCCTCATGCTGTTATCAGTTGGAAATGAATCAGAGATTAGGAAGCGGGGGGAGTGGTGGGGGTGTTATCGCCCAGTGCACACGGGGCTCTCAGCTAATCTCTGGCGGCGCTGAAGGAA	030	regLM	8	0.702473	5.6416	-0.0898739	0.577766	5.64162	0.0881801
gen_520	GTTTAGCGTAAGAATCAGGGTCCAGCTGGTGCTCCCTAAACAGCAGCTGCTGTTCACTGTTGAAAGGCGCTCTGGAAGGCCAGGTGCGGTGGCTCATGCTTGTAATCCCAGCACTGTGGGAGGCCGAGGTGGGCGGATCACCTGAGGTAAGGAGTTCGAGACCAGCCTGACCAACGTGGAGAAACCCCATCTCTACTAAA	030	regLM	62	0.133411	2.51633	3.27699	0.357764	2.51646	0.833096
gen_521	CCTGAGAAAGGCTTCAACTAAAGAGCTATGGACAGGGACACTCTGTCACTTCCTGGGATTTTGACCCCCAGCTGTCCAACAGAGGAGGGTCTGTGCCTTCGCTCATTAGCCTAACTTAGATGATAGGTGACAAACTGAAGTGAGCTATGGGGAGAGGTACCTCATTTATCTGTTGCTGGGTGTGTCACAGCAGGGGATGA	030	regLM	24	-0.0704607	2.03764	-0.752013	-0.211741	2.03776	-0.873412
gen_522	ATTATGATACAGTCCAAGTATGTAACTTTCTGGGGACCAGACTTTGCTGAGAGTCATAATGGAGAGTCAAAGAGTCTGATGGCTGAGAGGGATGTGCCTAGGCTTGCCTTCATAAATGTTCATTGTCTCAGCCAAGGTTTTGGCAGGAGCGAGAGCAGGCTCAGATCAGTGTCACAGGCAGTACCTTACGTGTCTGGGGC	030	regLM	96	1.57836	0.0296813	5.14777	1.27258	0.0297572	1.87699
gen_523	GTTTAGCGTAAGAATCAGGGTCCAGCTGGTGCTCCCTAAACAGCAGCTGCTGTTCACTGTTGAAAGGCGCTCTGGAAGGCCAGGTGCGGTGGCTCATGCTTGTAATCCCAGCACTGTGGGAAGCGGAGGTGGGCAGATCACCTGAGGCAGGGAGTTCGAGACCAGCCTGACCAACGTGGAGAAACCCCATCTCTCCTAAA	030	regLM	66	-0.15136	1.99061	2.24569	-0.074571	1.99058	-0.113613
gen_524	GATTTTTCTACTGCTAGGTTTTCCTTTTGGGGTTACGATTATTACAGGTGGCAATCAGTTAACTTAGTGGTTCTGTAGGCACCGCCCTATCTTCCAACTCACTTACATTTAAAAATTCACACAGAGAGGCTAGTGGGAAGCGGGTAGGTGTAAACAATGTGCTACAGTGAGAAATAGTACAGCCACTCAAAACAATGGAG	030	regLM	98	0.646887	1.37816	0.39153	0.299374	1.37813	0.407674
gen_525	CCAGTAATGGGATGGCTGGGTCCAATGGTATTTCTAGTTCTAGATCCCTGAGGAATTGCCACACTGACTTCCACAATGGTTGAACTAGTTTACAGTCCCGCCAACAGTGTAAAATTATTCCTATTTCTCCACATCCTCTCCAGCACCTGTTGTTTCCTGCCTTTTTTTGTCTCTACCTTGACGGGAAGGGGTTTCACCAT	030	regLM	23	-0.241009	0.238988	-0.337449	0.22995	0.239022	-0.140249
gen_526	CCTGAGAAAGGCTTCAACTAAAGAGCTATGGACAGGGACACTCTGTCACTTCCTGGGATTTTGACCCCCAGCTGTCCAACAGAGGAGGGTCTGTGCCTTCGCTCATTAGCCTAACTTAGATGATAGGTGACAAACTGAAGTGAGCTATGGGGAGAGGTACCTCCCATTCCTCTCTGGGCTGCACACTTCAGTGCATGAGA	030	regLM	25	0.516559	1.13827	-0.075249	-0.000755984	1.13825	-0.276817
gen_527	CCAGTAATGGGATGGCTGGGTCCAATGGTATTTCTAGTTCTAGATCCCTGAGGAATCGCCACACTGACTTCCACAATGGTTGAACTAGTTTACAGTCCCACCAACAGTGTAAAATTATTCCTATTTCTCCACATCCTCTCCAGCACCTGTTGTTTCCTGACTTTTTAATGATTGCCATTCTAACTGGTGTGAGATGGTAT	030	regLM	5	-0.616981	-0.0620445	-0.519053	-0.229714	-0.0620117	-0.587428
gen_528	GATGGGTGCCTCTCCATGGAGCTCACATGTCATACTGCGCCCTGACTCATCACATGTCATTGTTCCTTTGTATTAATTTTCTGTCATCTACAGTGAGTTCCTTGAGGGCAGGGAAAGGGCTTTTTATCTCTGCATTACCAGAGCCCAACAGATACACACTGGTTCTTATCCATCCACCCATTCATCCATTCATTCATTCA	030	regLM	7	-0.2221	5.42981	-0.385668	0.0419568	5.4299	-0.201087
gen_529	CCTGAGAAAGGCTTCAACTAAAGAGCTATGGACAGGGACACTCTGTCACTTCCTGGGATTTTGACCCCCAGCTGTCCAACAGAGGAGGGTCTGTGCCTTCGCTCATTAGCCTAACTTAGATGATAGGTGACAAACTGAAATGAGCTATAGGGAGTTGTCCACTTCCAGGCTGCTATCACTGTCTCAGATGTTGTATGAGC	030	regLM	11	-0.0137183	0.990156	-0.451527	-0.160667	0.990245	-0.666941
gen_530	CCAGTAATGGGATGGCTGGGTCCAATGGTATTTCTAGTTCTAGATCCCTGAGGAATTGCCACACTGACTTCCACAATGGTTGAACTAGTTTACAGTCCCGCCAACAGTGTAAAATTATTCCTATTTCTCCACATCCTCTCCAGCACCTGTTGTTTCCTGCCTTTTTAATGATCACCATTCTAACTGGTGTGAGATGGTAT	030	regLM	3	-0.585707	0.237277	-0.554294	-0.110213	0.237215	-0.389132
gen_531	CCCGAATACTGTGCTTTTCCGACGGGCTTAGGAAACGGCACACCAGGATATTATATCCTGCACCTGGCTCGGAGGGTCCTACGTGCACGGAGTCTCGCTGATTGCTAGCACAGAAGTCTGAGATCAAACTGCAAGGCGGCAGCGAGGCTGGGGGAGGGGTGCCCGCCATTGCCCAGGCTTGCTTAGGTAAACCGAACTGG	030	regLM	97	0.771567	-0.0636371	1.16895	1.67825	-0.0636963	0.0793394
gen_532	CTCTCTATTACATTCCATTCTCCATTCCATTCCATTCTCCATTCCATTCCATTCTCCATTCCATTCCACTCCATTCTCCATTCCATTCCATTCTCCATTATATTCTCCATTCCATTCCATTCTCCATTACATTCCATTCTCCATTACATTCCATTCTCCATTACATTCCATTCCATTCTCCATTCCATTCCCCTTTCCAT	030	regLM	88	-0.552126	-0.251921	3.68953	-0.297991	-0.252026	-0.230368
gen_533	TCTCTGCTCCCCAGAGTCCCTGCACGTGGCTTGACAGTGGCCTTGGTAGGACCCACTGGGGTGTTTCTTCGTCGCCCATGGGCCCTCATGCTGTTATCAATTGGAAATGAATCAGAGATTAGGAAGCGGGGGGAGTGGTGGGGGTGTTATCGCCCAGTGCACACAGGTTACCACAGATGGAATGAGGGAATGCGGAAACC	030	regLM	22	0.720754	3.39529	-0.358417	0.354215	3.39498	-0.103629
gen_534	TCATTTGAAGATGGAGGCAGAGATTGGAGTGATACAACTATAAGTCAGGGAATGCCAAGGACTTGAGGTCATGTGTTACAGAAGCCCTAGGAAATGAGTCAATTTCCTGGCACAGCACTAAGACATGCTGGTATTCTTCATTCCATCCCTTTCCCCTATTCCTAAATGTGCTCCAGGGACAATGGGGAAGCTGGAGCACC	030	regLM	95	0.664549	-0.00909997	5.84014	3.42942	-0.00909913	6.51174
gen_535	GATTTTTCTACTGCTAGGTTTTCCTTTTGGGGTTACGATTATTACAGGTGGCAATCAGTTAACTTAGTGGTTCTGTAGGCACCGCCCTATCTTCCAACTCACTTACATTTAAAAATTCACACAGAGAGGCTAGTGGGAAGCGGGTAGGTGTAAACAATGTGCTACAGTGAGTCACACCCGTCACAGAACAACAGTGTGGA	030	regLM	100	2.37887	3.65565	0.230298	2.13894	3.65525	0.873854
gen_536	CCAGTAATGGGATGGCTGGGTCCAATGGTATTTCTAGTTCTAGATCCCTGAGGAATCGCCACACTGACTTCCACAATGGTTGAACTAGTTTACAGTCCCGCCAACAGTGTAAAATTATTCCTATTTCTCCACATCCTCTCCAGCACCTGTTGTTTCCTGACTTTTTAATGATCGCCATTCTAACTGGTGTGAGATGGTAT	030	regLM	4	-0.553058	0.244381	-0.545725	-0.161205	0.24451	-0.516957
gen_537	AGAATTGGAAGGAGCTTAGGGGAAAGCTAGCCTCAGGTCAGAATTGCCTGCATGCCACTCGGCTGGCTAGTGAGCTGCTGAATCACCTTATTCCTGGAGAAAGACTTTGATACTGAGAAAACTGACTTGCTCAGCTCTTGCTACAACTGTGACCATCTCTGCAACAGTACAGACACAATGTCCATCTGGCTGTTGTTCTC	030	regLM	95	0.219174	0.916689	0.271998	0.0386534	0.916655	0.39703
gen_538	ATATTGGTACAGCACATTTGTCGCTATTAATAAACCAGTATCCAGGGCCAGGTGCAGTGGCTCACGCCTGTAATCCCAGCACTTTGGGAGGCCGAGGCAGGTGGATCACCTGAGGTCAGGAGTTCGAGACCAGCCTGACCAACATGGGAAAACCCTGTCTCTACTAAAAATACAAAATTAGCTGGGCTTGGTGGTGCATA	030	regLM	48	-0.295389	3.20832	3.30322	-0.0356262	3.20839	0.782066
gen_539	AAACAAATTATGTAGAAGCCAAACCATTTTACTTCCCTCACTGTAGACCACACATAGCAACACAGTCTGTGTCTTTGTTCATGTTTTTAGAATTCCATCCACAGAGAGGAGAAAATACATCTGGGGAATTTGCCGCTGCTCTGAGTTCCAAAGTCCAAACCAATGTAATTGTTTCGGAATAACGGATGACACTTTTAGCT	030	regLM	99	2.57432	0.667811	0.244604	2.42215	0.667778	1.01997
gen_540	TCTCTGCTCCCCAGAGTCCCTGCACGTGGCTTGACAGTGGCCTTGGTAGGACCCACTGGGGTGTTTCTTCGTCGCCCATGGGCCCTCATGCTGTTATCAGTTGGAAATGAATCAGAGATTAGGAAGCGGGGGGAGTGGTGGGGGTGGTATTGCGCCCTGGAGCAGGACAGATTGTTAGGAGAGGAATAAGATGAGCCAGT	030	regLM	34	0.737207	2.82563	-0.133227	0.325583	2.82537	0.173749
gen_541	ATTATGATACAGTCCAAGTATGTAACTTTCTGGGGACCAGACTTTGCTGAGAGTCATAATGGAGAGTCAAAGAGTCTGATGGCTGAGAGGGATGTGCCTAGGCTTGCCTTCATAAATGTTCATTGTCTCAGCCAAGGTTTTGGCAGGAGCGAGAGCAGGCTCAGATCAGTGTCACAGGCAAGATCCAGCACAGCTAAGCT	030	regLM	95	1.47641	0.0622706	5.19919	1.22658	0.0623019	2.15431
gen_542	CCAGTAATGGGATGGCTGGGTCCAATGGTATTTCTAGTTCTAGATCCCTGAGGAATCGCCACACTGACTTCCACAATGGTTGAACTAGTTTACAGTCCCACCAACAGTGTAAAATTATTCCTATTTCTCCACATCCTCTCCAGCATCTGTTGTTTCCTGCCTTTTTAATGATCACCATTCTAACTGGTGTGAGATGGTAT	030	regLM	3	-0.561251	0.0906225	-0.407608	-0.0623685	0.0928096	-0.420192
gen_543	CCATCTGTTCCATCCTCACCCACCCAAGGAGCCGCCCCTGCTCCTAGAGACTCTGGGCACCACTGATAAGGGTGGGTACCAGGAACTCCACCCTTTACCAAGAAAGGCAGGCTGGTTTATCGCCACTCAGACCCAGCCAGCAACCACCCTGGGGAGTGTGTCAGCCACCAGGAGCATCGCTGTTGGGGAAATGTTATTAA	030	regLM	84	0.468501	7.71161	0.299534	0.10555	7.71155	1.58128
gen_544	ATATTGGTACAGCACATTTGTCGCTATTAATAAACCAGTATCCAGGGCCAGGTGCAGTGGCTCACGCCTGTAATCCCAGCACTTTGGGAGGCCGAGGTGGGTGGATCACCTGAGGTCAGGAGTTCGAGACCAGCCTGACCAACATGGGAAAACCCTGTCTCTACTAAAAATACAAAATTAGCTGGGCTTGGTGGTGCATT	030	regLM	46	-0.185574	3.43792	3.83686	0.172394	3.43785	1.42316
gen_545	TCTCTGCTCCCCGGAGTCCCTGCACGTGGCTTGACAGTGGCCTTGGTAGGACCCACTGGGGTGTTTCTTCGTCGCCCATGGGCCCTCATGCTGTTATCAGTTGGAAATGAATCAGAGATTAGGAAGCGGGGGGAGTGGTGGGGGTGTTATCGCCCAGTGCACACAGGTTACCACAGAGGTCAGAAGGAAGCAGCCCAGTT	030	regLM	24	1.12359	5.52934	-0.265437	0.915284	5.52935	-0.0978971
gen_546	CTCAGAATTAATGGAGAGGGCCAGTGGCGGCCTGTGCCCTTTGTCCCACCGGCCGGCCTGGGGGTGGCGGCTCCAGAATACAGGGTCCTATTGTGTGCCCTGATGTCAGGCAGCTGGACTGCTGGGAGTGAGGATAAACAAGCAGCTGGAGCATCTCGCCTGAAGCCCCAGGAGAGGGCCAGAGCCCCTGAAGAAGCATG	030	regLM	97	2.77404	-0.0134577	1.16173	2.0802	-0.0135018	1.18788
gen_547	GTTTAGCGTAAGAATCAGGGTCCAGCTGGTGCTCCCTAAACAGCAGCTGCTGTTCACTGTTGAAAGGCGCTCTGGAAGGCCAGGTGCGGTGGCTCATGCTTGTAATCCCAGCACTGTGGGAGGCCGAGGTGGGCGGATCACCTGAGGTAAGGAGTTCGAGACCAGCCTGACCAACGTGGAGAAACCCCGTCTCTCCTAAA	030	regLM	62	0.210649	2.57671	3.0104	0.383298	2.57679	0.806415
gen_548	CCTCAGAATTAATGGAGAGGGCCAGTGGCGGCCTGTGCCCTTTGTCCCACTGGCCGGCCTGGGGGTGGCGGCTCCAGAATACAGGGTCCTATTGTGTGCCCTGATGTCAGGCAGCTGGACTGCTGGGAGTGAGGATAAACAAGCAGCTGGAGCATCTCGCCTGAAGCCCCAGGAGAGGGCCAGAGCCCCTGAAGAAGCAT	030	regLM	98	2.81878	0.133564	1.46002	2.32689	0.133576	1.38158
gen_549	ATTAGCATGGAATTTGGACTTTGGAGCCATAATCCTGTTGTCTTCTTTCATTTAAAGAATATGGGCCAGGCGCGGTGGCTCACGCCTGTAATCCCAGCACTTTGGGAGGCCGAGGCAGGTGGATCATGAGGTCAGGAGATCGAGACCATCCTGGCTAACACGGTGAAAGCCTGTCTCTACTAAAAATACAAAAAAATTAG	030	regLM	59	0.078339	2.83071	1.1362	0.835763	2.83025	1.36558
gen_550	CCAGTAATGGGATGGCTGGGTCCAATGGTATTTCTAGTTCTAGATCCCTGAGGAATTGCCACACTGACTTCCACAATGGTTGAACTAGTTTACAGTCCCACCAACAGTGTAAAATTGTTCCTGTTTCTCCACATCCTCTCCAGCACCTGTTGTTTCCTGACTTTTTAATGATTGCCATTCTAACTGGTGTGAGATGGTAT	030	regLM	8	-0.491681	0.406657	-0.496241	-0.0944357	0.407048	-0.517847
gen_551	CTTTTTGAAAGCAGTGTGGTCTTGGCTCAAGGCACATAAAGCAGACATTTGTTCTCCATGCTCATTATTACAATGACTACAATTATCTTTGAGTAGAATGAAAAAGAATTATGAGTTAATCATTAACATTTAAATTGCTGAGGTTTGGCAGAGCTTTTCCTGAGAAAGCAGATTGTTGAGAGTTTGGAGAACTTTTCCAC	030	regLM	94	2.35647	-0.0255304	-0.139719	0.678328	-0.0255197	0.0857888
gen_552	CCATCTGTTCCATCCTCACCCACCCAAGGAGCCGCCCCTGCTCCTAGAGACTCTGGGCACCACTGATAAGGGTGGGTACCAGGAACTCCACCCTTTACCGAGAAAGGCAGGCTGGTTTATCGCCACTCAGACCCAGCCAGCAACCACCCTGGGGAGTGTGTCAGCCACCAGGAGCATCGCTGTTGGGGAATGGGTTGGTG	030	regLM	84	0.365355	8.07678	0.864517	0.196696	8.07685	1.65796
gen_553	CTAGCTGTACCAGCCGCTGCCCCGGACCTGCTGCCCTGCCCCACCCCCCCCTCCCCTGGCCAGCCTCCCCAGAGGCCAGAAGGCGCCTTATCGGGCAGGGTTAAGGAGGGGGACAGTTATCAGGGGCTGCAGCCTAGATTGGGCCACAATGTCCTCGTCTCTTGAGGGTGGCAGGCTGTGCAGGCTCCCTGACAAGGGGG	030	regLM	7	0.520095	4.69306	0.731529	0.306218	4.69301	0.761613
gen_554	ACTGGGATTGCTTGGTTGAATGGTAGTTCCATTTTTAGTTCTTTGAGAAATCTCCAAACTGCTTTCCACAGCAGCTTAACTAATTTACATTCCCACCAGCACTGTCTTAAGTGTTTCCTTTTCTCCGCAGCCTTGCCAACATCTGTAATTTTTTGACTTTTTAATGATATTCTTTATGACTGGTGCAAGGTGGTATCTCA	030	regLM	53	-0.0508154	0.322502	0.294129	0.197996	0.322425	0.226725
gen_555	CCATCTGTTCCATCCTCACCCACCCAAGGAGCCGCCCCTGCTCCTAGAGACTCTGGGCACCACTGATAAGGGTGGGTACCAGGAACTCCACCCTTTACCGAGAAAGGCAGGCTGGTTTATCGCCACTCAGACCCAGCCAGCGACCACCCTGGGGAGTGTGTCAGCCACCAGGAGCATCGCTGTTGGGGAGTGGGTTGGGG	030	regLM	85	-0.106389	7.29584	0.596158	0.000813654	7.29577	1.22468
gen_556	AGAATTGGAAGGAGCTTAGGGGAAAGCTAGCCTCAGGTCAGAATTGCCTGCATGCCACTCGGCTAGTGAGCTGCTGAATCACCTTATTCCTGGAGAAAGATTTTGTTTTTTATTTTATTTTATTTTATTTTATTTTATTTTATTTTATTTTATTTTATTTTATTTTATTTTATTTTATTTTACTTTAAGATGCAGGCTTG	030	regLM	97	0.556382	0.786032	1.14335	0.513539	0.786115	1.5603
gen_557	CCCGAATACTGTGCTTTTCCGACGGGCTTAGGAAACGGCACACCAGGATATTATATCCTGCACCTGGCTCGGAGGGTCCTACGTGCACGGAGTCTCGCTCATTGCTAGCACAGAAGTCTGAGATCAAACTGCAAGGCGGCAGCGAGGCTGGGGGAGGGGTGCCCGCCATTGCCCAGGCTTGCTTAGGTAAACAGAGTAGC	030	regLM	95	0.973434	0.0764406	1.46819	2.06658	0.0764849	0.0242602
gen_558	GTTTAGCGTAAGAATCAGGGTCCAGCTGGTGCTCCCTAAACAGCAGCTGCTGTTCACTGTTGAAAGGCGCTCTGGAAGGCCAGGTGCGGTGGCTCATGCTTGTAATCCCAGCACTGTGGGAGGCCGAGGTGGGCGGATCACCTGAGGTAAGGAGTTCGAGACCAGCCTGACCAACTTGGAGAAACCTCATCTCTACTAAA	030	regLM	62	0.0836066	2.53754	3.1786	0.238364	2.53749	0.674274
gen_559	ATTAGCATGGAATTTGGACTTTGGAGCCATAATCCTGTTGTCTTCTTTCATTTAAAGAATATGGGCCGGGCGCGGTGGCTCACACCTGTAATCCCAGCACTTTGGGAGGCCGAGGCGGGTGGATCATGAGGTCAGGAGATCGAGACCATCCTGGCTAACACGGTGAAAGCCTGTCTCTACTAAAAATACAAAAAAATTAG	030	regLM	58	0.0787613	2.60005	0.587832	0.840805	2.6002	0.852884
gen_560	GTTTAGCGTAAGAATCAGGGTCCAGCTGGTGCTCCCTAAACAGCAGCTGCTGTTCACTGTTGAAAGGCGCTCTGGAAGGCCAGGCGCGGTGGCTCATGCTTGTAATCCCAGCACTGTGGGAGGCCGAGGTGGGCGGATCACCTGAGGCAGGGAGTTCGAGACCAGCCTGACCAACGTGGAGAAACCCCATCTCTCCTAAA	030	regLM	64	0.290887	2.6267	3.6346	0.560031	2.62668	1.26805
gen_561	AGAATTGGAAGGAGCTTAGGGGAAAGCTAGCCTCAGGTCAGAATTGCCTGCATGCCACTCGGCTGGCTAGTGAGCTGCTGAATCACCTTATTCCTGGAGAAAGACTTTGATACTGAGAAAACTGACTTGCTCAGCTCTTGCTACAACTGTGACCATCTCTGCAACAGTTTTCTTTGTCAAGAATAACATTATCACCTCAT	030	regLM	96	-0.0545622	0.957408	0.16215	-0.0655733	0.95742	0.225965
gen_562	AGAATTGGAAGGAGCTTAGGGGAAAGCTAGCCTCAGGTCAGAATTGCCTGCATGCCACTCGGCTGGCTAGTGAGCTGCTGAATCACCTTATTCCTGGAGAAAGACTTTGATACTGAGAAAACTGACTTGCTCAGCTCTTGCTACAACTGTGACCATCTCTGCAACAGTTTTCTGTTGTTTAAAAGAATGTATCATCTGTT	030	regLM	95	0.110298	0.858215	0.433441	-0.00426404	0.858241	0.505005
gen_563	CCTGAGAAAGGCTTCAACTAAAGAGCTATGGACAGGGACACTCTGTCACTTCCTGGGATTTTGACCCCCAGCTGTCCAACAGAGGAGGGTCTGTGCCTTCGCTCATTAGCCTAACTTAGATGATAGGTGACAAACTGAAGTGAGCTATAGGGAGTTGTCCACTTCCAGGCTGCTATCACTACAGCCCATCTGGAAGCAGG	030	regLM	12	-0.0288766	4.4076	-0.699118	-0.18123	4.40762	-0.710104
gen_564	CCTGAGAAAGGCTTCAACTAAAGAGCTATGGACAGGGACACTCTGTCACTTCCTGGGATTTTGACCCCCAGCTGTCCAACAGAGGAGGGTCTGTGCCTTCGCTCATTAGCCTAACTTAGATGATAGGTGACAAACTGAAGTGAGCTATGGGGTGGGGTGGGGGCGGGGGTGGGGTCACAGTTCTCAAGGGAGGAAGTTGC	030	regLM	29	1.38441	4.73664	0.386649	1.91174	4.73646	1.33345
gen_565	ATTAGCATGGAATTTGGACTTTGGAGCCATAATCCTGTTGTCTTCTTTCATTTAAAGAATATGGGCCGGGCGCGGTGGCTCACGCCTGTAATCCCAGCACTTTGGGAGGCCGAGGCGGGTGGATCACGAGGTCAGGAGATCGAGACCATCCTGGCTAACACAGTGAAACCCTGTCTCTACTAAAAATACAAAAAATTAGC	030	regLM	57	0.346539	3.56765	2.02515	1.22021	3.56815	2.34619
gen_566	ATTAGCATGGAATTTGGACTTTGGAGCCATAATCCTGTTGTCTTCTTTCATTTAAAGAATATGGGCCAGGCGCGGTGGCTCACGCCTGTAATCCCAGCACTTTGGGAGGCCGAGGCGGGTGGATCATGAGGTCAGGAGATCGAGACCATCCTGGCTAACACAGTGAAACCCTGTCTCTACTAAAAATACAAAAAATTAGC	030	regLM	58	0.182629	3.26806	1.68975	0.95129	3.26783	1.74219
gen_567	CCTCAGAATTAATGGAGAGGGCCAGTGGCGGCCTGTGCCCTTTGTCCCACTGGCCGGCCTGGGGGTGGCGGCTCCAGAATACAGGGTCCTATTGTGTGCCCTGATGTCAGGCAGCTGGACTGCTGGGAGTGAGGATAAACAAGCAGCTGGAGCATCTCGCCTGAAGCCCCAGGAGAGGGCCAGAGCCCCTGTAGCGTGGG	030	regLM	97	2.98169	0.16319	1.42247	2.54519	0.163207	1.36261
gen_568	TCTCTGCTCCCCGGAGTCCCTGCACGTGGCTTGACAGTGGCCTTGGTAGGACCCACTGGGGTGTTTCTTCGTCGCCCATGGGCCCTCATGCTGTTATCAATTGGAAATGAATCAGAGATTAGGAAGCGGGGGGAGTGGTGGGGGTGTTATCGCCCAGTGCACACAGGTTACCACAGACATTTAGCCCTCAGGAGATGAAG	030	regLM	21	0.128925	3.9717	-0.574416	0.0244042	3.97169	-0.375581
gen_569	CATTCCATTCCATTCCATTCTGCATTCTGTTCCATTCTCCATTCCATTCCATTCTCCATACCATCCTCCATTCCATTACACTGCATTCCATTCTCCATTATATTTTATTCACCACAGCATTCCATTACATTTTCCATTCCATTCTATTCTCCATTCCATTCCATATTCTATTCCTTTCTCCATTCCATTCCCCTTTCCAT	030	regLM	90	-0.906837	-0.459592	3.58182	-0.392277	-0.459613	-0.858041
gen_570	TCTCTGCTCCCCGGAGTCCCTGCACGTGGCTTGACAGTGGCCTTGGTAGGACCCACTGGGGTGTTTCTTCGTCGCCCATGGGCCCTCATGCTGTTATCAGTTGGAAATGAATCAGAGATTAGGAAGCGGGGGGAGTGGTGGGGGTGTTATCGCCCAGTGCACACAGGTTACCACAGACATTTATCACTGGCCAAAGGGAA	030	regLM	21	0.650173	5.48632	-0.518721	0.441628	5.48632	-0.306231
gen_571	TCTCTGCTCCCCGGAGTCCCTGCACGTGGCTTGACAGTGGCCTTGGTAGGACCCACTGGGGTGTTTCTTCGTCGCCCATGGGCCCTCATGCTGTTATCAGTTGGAAATGAATCAGAGATTAGGAAGCGGGGGGAGTGGTGGGGGTGTTATCGCCCAGTGCACACGGGGCTCTCAGCTAATCTCTGGCGGCCCTGGGTGAC	030	regLM	4	0.705407	5.74267	-0.243985	0.891762	5.7427	0.06682
gen_572	AGAATTGGAAGGAGCTTAGGGGAAAGCTAGCCTCAGGTCAGAATTGCCTGCATGCCACTCGGCTAGTGAGCTGCTGAATCACCTTATTCCTGGAGAAAGATTTTGTTTTTTATTTTATTTTATTTTATTTTATTTTATTTTATTTTATTTTATTTTATTTTATTTTATTTTATTTAACATAAGACTTTGAATTCCATGTG	030	regLM	97	0.213201	0.256311	0.560244	0.243158	0.256328	0.876521
gen_573	TCTCTGCTCCCCGGAGTCCCTGCACGTGGCTTGACAGTGGCCTTGGTAGGACCCACTGGGGTGTTTCTTCGTCGCCCATGGGCCCTCATGCTGTTATCAGTTGGAAATGAATCAGAGATTAGGAAGCGGGGGGAGTGGTGGGGGTGTTATCGCCCAGTGCACACGGGGCTCTCAGGCCTGCCCCACCCCAGGGTGACCCG	030	regLM	17	1.04197	6.16086	0.360483	1.20333	6.16084	0.304427
gen_574	ATTAGCATGGAATTTGGACTTTGGAGCCATAATCCTGTTGTCTTCTTTCATTTAAAGAATATGGGCCAGGCGCGGTGGCTCACGCCTGTAATCCCAGCACTTTGGGAGGCCAAGGCGGGTAGATCACGAGGTCAGGAGATCGAGACCATCCTGGCTAACACAGTGAAACCCTGTCTCTACTAAAAATACAAAAAAATTAG	030	regLM	58	0.21978	3.12786	2.62696	0.934413	3.12775	2.55371
gen_575	CCATCTGTTCCATCCTCACCCACCCAAGGAGCCGCCCCTGCTCCTAGAGACTCTGGGCACCACTGATAAGGGTGGGTACCAGGAACTCCACCCTTTACCGAGAAAGGCAGGCTGGTTTATCGCCACTCAGACCCAGCCAGCGACCACCCTGGGGAGTGTGTCAGCCACCAGGAGCATCGCTGTTGGGGAACTATTATTAA	030	regLM	84	-0.113703	7.34481	0.339012	0.00863323	7.3449	1.10023
gen_576	AGAATTGGAAGGAGCTTAGGGGAAAGCTAGCCTCAGGTCAGAATTGCCTGCATGCCACTCGGCTAGTGAGCTGCTGAATCACCTTATTCCTGGAGAAAGATTTTGTTTTTTATTTTATTTTATTTTATTTTATTTTATTTTATTTTATTTTATTTTATTTTATTTTATTTTATTTAACATAAGACTTTGAGATGGAATTT	030	regLM	99	0.197838	0.259553	0.566379	0.205889	0.259538	0.870158
gen_577	GATGGGTGCCTCTCCATGGAGCTCACATGTCATACTGCGCCCTGACTCATCACATGTCATTGTTCCTTTGTATTAATTTTCTGTCATCTACAGTGAGTTCCTTGAGGGCAGGGAAAGGGCTTTTTATCTCTGCATTACCAGAGCCCAACAGATACACACTGGTTCTTATCAAATATTAACCATCTTTTATCACATACAGA	030	regLM	18	0.528646	5.49486	-0.12955	0.917935	5.49493	0.00515079
gen_578	CTAGCTGTACCAGCCGCTGCCCCGGACCTGCTGCCCTGCCCCACCCCCCCCTCCCCTGGCCAGCCTCCCCAGAGGCCAGAAGGCGCCTTATCGGGCAGGGTTAAGGAGGGGGACAGTTATCAGGGGCTGCAGCCTAGGTTGGGCCACAATGTCCTCGTCTCTTGAGGGTGGCAGGCTGTGCAGGCTCCCTGACAGGGGCC	030	regLM	6	0.543818	5.2101	0.527207	0.392827	5.21013	0.746059
gen_579	AACAAAAAACAAACAACCCCATCAACAAGTGGGCGAAGGATATGAACAGACACTTCTCAAAAGAAGATATTTATGCAGCCAACAAACATATGAAAAAATGCTCATCATCACTGGCCATCAGAGAAATGCAAATCAAAACCACAATGAGATACCATCTCACACCAGTTAGAATGGCGATCATTGAAAAGTCAGGAAGCAAC	030	regLM	39	-0.420137	0.756844	-0.0561933	-0.162377	0.75682	-0.37309
gen_580	CCTGAGAAAGGCTTCAACTAAAGAGCTATGGACAGGGACACTCTGTCACTTCCTGGGATTTTGACCCCCAGCTGTCCAACAGAGGAGGGTCTGTGCCTTCGCTCATTAGCCTAACTTAGATGATAGGTGACAAACTGAAGTGAGCTATGGGGAGAGGTACCTCCCATTCCTCTCTGGGCCTGAATTGAATTTTGTGGCCT	030	regLM	27	0.390145	0.750213	0.117404	-0.135946	0.750264	-0.180524
gen_581	TCTCTGCTCCCCAGAGTCCCTGCACGTGGCTTGACAGTGGCCTTGGTAGGACCCACTGGGGTGTTTCTTCGTCGCCCATGGGCCCTCATGCTGTTATCAGTTGGAAATGAATCAGAGATTAGGAAGCGGGGGGAGTGGTGGGGGTGTTATCGCCCAGTGCACACAGGTTACCACAGACATTTATCACTCACCAGGGGCGG	030	regLM	21	0.75285	5.78639	-0.25507	0.655217	5.78646	-0.146247
gen_582	CCTGAGAAAGGCTTCAACTAAAGAGCTATGGACAGGGACACTCTGTCACTTCCTGGGATTTTGACCCCCAGCTGTCCAACAGAGGAGGGTCTGTGCCTTTGCTCATTAGTCCATTTTACAGAGAGCTGATTGGTCTGTTTTACAGAGAGCTGATTGGTCTGTTCAAATGCTCTTTATTAAACAGCATTTGTCAATTAAAT	030	regLM	48	3.21675	2.7248	3.61073	3.93685	2.72482	3.98658
gen_583	CCTGAGAAAGGCTTCAACTAAAGAGCTATGGACAGGGACACTCTGTCACTTCCTGGGATTTTGACCCCCAGCTGTCCAACAGAGGAGGGTCTGTGCCTTTGCTCATTAGCCTAACTTAGATGATAGGTGACAAACTGAAATAAAGATATGCTCTGAGACAGAGGCAGAAAAATAAAAGGGGGTCTTGCTCTGTCCCCCAG	030	regLM	39	-0.0620464	-0.0256272	-0.0102473	-0.301047	-0.0255983	-0.541765
gen_584	AAAAAAACAAACAACCCCATCAACAAGTGGGCGAAGGATATGAACAGACACTTCTCAAAAGAAGATATTTATTCAACCAAAAGACACATGAAAAAATGCTCATCATCACTGGCCATCAGAGAAATGCAAATCAAAACCACAATGAGATACCATCTCACACCAGTTAGAATGGCGATCATTAAAAAGTCAAGAAATAACAC	030	regLM	47	-0.551038	0.193189	-0.0114127	-0.21982	0.193003	-0.36952
gen_585	GTTTAGCGTAAGAATCAGGGTCCAGCTGGTGCTCCCTAAACAGCAGCTGCTGTTCACTGTTGAAAGGCGCTCTGGAAGGCCAGGTGCGGTGGCTCATGCCTGTAATCCCAGCACTGTGGGAGGCCGAGGTGGGCGGATCACCTGAGGTAGGGAGTTCAAGACCAGCCTGACCAACGTGGAGAAACCCCATCTCTCCTAAA	030	regLM	61	0.102271	2.15777	2.70128	0.334151	2.15788	0.40573
gen_586	ACTGGGATTGCTTGGTTGAATGGTAGTTCCATTTTTAGTTCTTTGAGAAATCTCCAAACTGCTTTCCACAGCAGCTTAACTAATTTACATTCCTACCAACAGTGTAAAAATGTTCCCTTTTCTCCACATCCTCTCCAGTATCTGTTGTTTCCTGACTTTTTAATGATAGCCATTCTAACTGGTGTGAGATGGTATCTCAT	030	regLM	33	-0.265758	3.08064	-0.0518766	0.04141	3.0804	-0.022909
gen_587	ATTATGATACAGTCCAAGTATGTAACTTTCTGGGGACCAGACTTTGCTGAGAGTCATAATGGAGAGTCAAAGAGTCTGATGGCTGAGAGGGATGTGCCTAGGCTTGCCTTCATAAATGTTCATTGTCTCAGCCAAGGTTTTGGCAGGAGCGAGAGCAGGCTCAGATCAGTGTCACAGGCAGTACCTTACGTGGCTTGGGC	030	regLM	96	1.56922	0.0084256	5.11354	1.26891	0.00840612	1.96081
gen_588	GTTTAGCGTAAGAATCAGGGTCCAGCTGGTGCTCCCTAAACAGCAGCTGCTGTTCACTGTTGAAAGGCGCTCTGGAAGGCCAGGTGCGGTGGCTCATGCTTGTAATCCCAGCACTGTGGGAGGCCGAGGTGGGCGGATCACCTGAGGTAAGGAGTTTGAGACCAGCCTGACCAACGTGGAGAAACCCCATCTCTCCTAAA	030	regLM	63	0.24258	1.34955	1.82462	0.524369	1.34955	-0.070541
gen_589	CTAGCTGTACCAGCCGCTGCCCCGGACCTGCTGCCCTGCCCCACCCCCCCCTCCCCTGGCCAGCCTCCCCAGAGGCCAGAAGGCGCCTTATCGGGCAGGGTTAAGGAGGGGGACAGTTATCAGGGGCTGCAGCCTAGGTTGGGCCACAATGTCCTCGTCTCTTGAGGGTGGCAGGCTGTGCAGGCTCCCTGACAAGGGGT	030	regLM	6	0.519242	5.17524	0.505493	0.36224	5.17525	0.7482
gen_590	GTTTAGCGTAAGAATCAGGGTCCAGCTGGTGCTCCCTAAACAGCAGCTGCTGTTCACTGTTGAAAGGCGCTCTGGAAGGCCAGGCGCGGTGGCTCATGCTTGTAATCCCAGCACTGTGGGAGGCCGAGGTGGGTGGATCACCTGAGGTAAGGAGTTCGAGACCAGCCTGACCAACGTGGAGAAACCCCATCTCTCCTAAA	030	regLM	62	0.179879	2.82568	4.03137	0.357537	2.82571	1.77185
gen_591	CTGTTTGTGCTGTGTGTTTCCAATAATTGACAACATATGTGATTTTGTTATTCTACACTGAGCTTGCTTCGTCTGCATATTCATTAAAAAAGAATTTTTTAAATCTTTGTCAGATGTTCTACATCTGAATCATCTTCTAGTATTAAACCACAGCCAAGAACTTTTATATCTTTTATCACATTAATATAAAGAACCCAAAA	030	regLM	93	-0.18559	-0.636378	3.01526	0.434015	-0.636415	1.60091
gen_592	GATTTTTCTACTGCTAGGTTTTCCTTTTGGGGTTACGATTATTACAGGTGGCAATCAGTTAACTTAGTGGTTCTGTAGGCACCGCCCTATCTTCCAACTCACTTACATTTAAAAATTCACACAGAGAGGCTAGTGGGAAGCGGGTAGGTGTAAACAATGTGCTACAGTGAGTCACACCCGTCACAGAACAACAGTGTGGC	030	regLM	100	2.40796	3.59659	0.216769	2.183	3.59656	0.873673
gen_593	TGCACCCCCCCATCATTTTCTTCATTTGTATAATGAGGCTAATACCATGTGTACAACACCGCCGAAATGTACTGGCAGCTCCATATTTCCTTCTCTTATCTCATATTCATCTTTCCACATCTCCCATGAGAGTTTCTCAAGCTGATTAAATTCCTATCCAACATATGTCAGATACATAATTTCAAAATGAGATCAAAATT	030	regLM	98	-0.165935	0.0666117	2.10095	-0.00577399	0.0666619	-0.410962
gen_594	GTTTAGCGTAAGAATCAGGGTCCAGCTGGTGCTCCCTAAACAGCAGCTGCTGTTCACTGTTGAAAGGCGCTCTGGAAGGCCAGGCGCGGTGGCTCATGCTTGTAATCCCAGCACTTTGGGAGGCCGAGGTGGGCGGATCACCTGAGGTAAGGAGTTCGAGACCAGCCTGACCAACGTGGAGAAACCCCATCTCTCCTAAA	030	regLM	62	0.180166	3.52235	4.04417	0.480945	3.52243	2.16795
gen_595	GTTTAGCGTAAGAATCAGGGTCCAGCTGGTGCTCCCTAAACAGCAGCTGCTGTTCACTGTTGAAAGGCGCTCTGGAAGGCCAGGCGCGGTGGCTCATGCTTGTAATCCCAGCACTGTGGGAGGCCGAGGTGGGCGGATCACCTGAGGTAAGGAGTTCGAGACCAGCCTGACCAACGTGGAGAAACCCCATCTCTCCAAAA	030	regLM	64	0.290708	2.86369	3.95539	0.512644	2.86367	1.87146
gen_596	AGAATTGGAAGGAGCTTAGGGGAAAGCTAGCCTCAGGTCAGAATTGCCTGCATGCCACTCGGCTAGTGAGCTGCTGAATCACCTTATTCCTGGAGAAAGATTTTGTTTTTTATTTTATTTTATTTTATTTTATTTTATTTTATTTTATTTTATTTTATTTTATTTTATTTTATTTAACATAAGACTTTGAATTGCAAAAT	030	regLM	97	0.266103	0.260873	0.664415	0.254129	0.260855	0.974981
gen_597	TCCTGAATGGGCAAAAACTGGAAGCATTCCCTTTGAAAACTGGCACAAGACGGGGATGCCCTCTCTCACCGCTCCTATTCAACATAGTGTTGGAAGTTCTGGCCAGGGCAATCAGGCAGGAGAAATAAATAAAGGGTATTCAATTAGGAAAAGAGGAAGTCAAATTGTCCCTGTTTGCAGATGACATGACTGTATATCTA	030	regLM	20	-0.138242	0.683474	-0.494079	0.34302	0.683532	-0.113352
gen_598	TCTCTGCTCCCCAGAGTCCCTGCACGTGGCTTGACAGTGGCCTTGGTAGGACCCACTGGGGTGTTTCTTCGTCGCCCATGGGCCCTCATGCTGTTATCAGTTGGAAATGAATCAGAGATTAGGAAGCGGGGGGAGTGGTGGGGGTGTTATCGCCCAGTGCACACAGGTTATCACAGCTCAGGGGTTCGAAGTTCAAAGGG	030	regLM	21	2.14991	4.77942	-0.681307	2.3394	4.77935	-0.432104
gen_599	TCTCTGCTCCCCAGAGTCCCTGCACGTGGCTTGACAGTGGCCTTGGTAGGACCCACTGGGGTGTTTCTTCGTCGCCCATGGGCCCTCATGCTGTTATCAGTTGGAAATGAATCAGAGATTAGGAAGCGGGGGGAGTGGTGGGGGTGTTATCGCCCAGTGCACACAGGTTACCACAGACATTTAGCCCTCACTGCAGTGGG	030	regLM	21	0.872204	5.14882	-0.477745	0.494443	5.1491	-0.160195
gen_600	TGCACCCCCCCATCATTTTCTTCATTTGTATAATGAGGCTAATACCATGTGTACAACACCGCCGAAATGTACTGGCAGCTCCATATTTCCTTCTCTTATCTCATATTCATCTTTCCACATCTCCCATGAGAGTTTCTCAAGCTGATTAAATTCCTATCCAACATATGTCAGATACATACTTTCAATTCCTAACATCCATC	030	regLM	96	0.00581585	0.314492	3.08105	0.280679	0.314517	-0.0252061
gen_601	AGAATTGGAAGGAGCTTAGGGGAAAGCTAGCCTCAGGTCAGAATTGCCTGCATGCCACTCGGCTAGTGAGCTGCTGAATCACCTTATTCCTGGAGAAAGATTTTGTTTTTTATTTTATTTTATTTTATTTTATTTTATTTTATTTTATTTTATTTTATTTTATTTTATTTTATTTTACTTTAAGATGCAGGCTTGTTATA	030	regLM	95	0.640926	0.898601	1.26847	0.510925	0.898438	1.60167
gen_602	GATTTTTCTACTGCTAGGTTTTCCTTTTGGGGTTACGATTATTACAGGTGGCAATCAGTTAACTTAGTGGTTCTGTAGGCACCGCCCTATCTTCCAACTCACTTACATTTAAAAATTCACACAGAGAGGCTAGTGGGAAGCGGGTAGGTGTAAACAATGTGCTACAGTGAGAAACCTGGGGTGTTTGCAGCACTTTCCAA	030	regLM	100	0.485461	1.43931	0.106375	0.175989	1.43922	0.12095
gen_603	ATTAGCATGGAATTTGGACTTTGGAGCCATAATCCTGTTGTCTTCTTTCATTTAAAGAATATGGGCCAGGCGCGGTGGCTCACGCCTGTAATCCCAGCACTTTGGGAGGCCGAGGCAGGTGGATCATGAGGTCAGGAGATCGAGACCATCCTGGCTAACACAGTGAAACCCTGTCTCTACTAAAAATACAAAAAATTAGC	030	regLM	59	0.0403399	2.9866	1.08691	0.673758	2.98624	1.53113
gen_604	CCAGTAATGGGATGGCTGGGTCAAATGGTATTTCTAGTTCTAGATCCCTGAGGAATTGCCACACTGACTTCCACAATGGTTGAACTAGTTTACAGTCCCACCAACAGTGTAAAATTATTCCTATTTCTCCACATCCTCTCCAGCACCTGTTGTTTCCTGACTTTTTAATGATCACCATTCTAACTGGTGTGAGATGGTAT	030	regLM	3	-0.639745	-0.0137209	-0.440409	-0.165452	-0.0138161	-0.536611
gen_605	CTACTTGGGAGGCTGAGACAGAAGAATGGCATGAACCTGGGAGACTGAGACAGGAGAATGGCATGAACCTGGGAGACGGAGGTTGCAGTGAGCCGAGATCATGCCACTGCACTCCAGCCTGGGCGAGAGAGAGAGAGAGAGAGAGAGAGAGAGAGAGAGAGAGAGAGAGAGAGAGAGAGAGAGAGAGAGAGAGAGAGAGA	030	regLM	90	0.251659	2.18971	1.856	0.113442	2.18976	0.455075
gen_606	AGAATTGGAAGGAGCTTAGGGGAAAGCTAGCCTCAGGTCAGAATTGCCTGCATGCCACTCGGCTGGCTAGTGAGCTGCTGAATCACCTTATTCCTGGAGAAAGCCTTTGATACTGAGAAAACTGACTTGCTCAGCTCTTGCTACAACTGTGACCATCTCTGCAACAGTAAAGTAAAAACAAATACCTCTCTTGTTGGGTA	030	regLM	94	0.406804	1.09372	0.111051	0.252477	1.09377	0.593874
gen_607	CCTGAGAAAGGCTTCAACTAAAGAGCTATGGACAGGGACACTCTGTCACTTCCTGGGATTTTGACCCCCAGCTGTCCAACAGAGGAGGGTCTGTGCCTTCGCTCATTAGCCTAACTTAGATGATAGGTGACAAACTGAAGTGAGCTATGGGAATGGTTATGGGAAATGGGGAGAAATTTTTAAAAAGGAAGTTGGGGAAG	030	regLM	31	0.352129	0.335001	0.0471522	0.0712849	0.334937	-0.0697362
gen_608	TCTCTGCTCCCCAGAGTCCCTGCACGTGGCTTGACAGTGGCCTTGGTAGGACCCACTGGGGTGTTTCTTCGTCGCCCATGGGCCCTCATGCTGTTATCAGTTGGAAATGAATCAGAGATTAGGAAGCGGGGGGAGTGGTGGGGGTGTTATCGCCCAGTGCACACAGGTTACCACAGACATTTAGCCCTTTATCAGAGGCG	030	regLM	24	0.689616	5.46904	-0.729617	0.548251	5.46897	-0.356926
gen_609	CTCTCTATTACATTCCATTCTCCATTCCATTCCATTCTCCATTCCATTCCACTCCATTCTCCATTCCATTCCACTCCATTCTCCATTCCATTCCATTCTCCATTAAATTCCATTCTCCATTACATTCCATTCTCCATTACATTCCATTCTCCATTACATTCCATTCTCCATTACATTCCATTCTCCATTCCATTCCATTC	030	regLM	87	-0.398675	-0.0879023	4.02895	-0.115055	-0.0877811	0.695532
gen_610	TCTCTGCTCCCCGGAGTCCCTGCACGTGGCTTGACAGTGGCCTTGGTAGGACCCACTGGGGTGTTTCTTCGTCGCCCATGGGCCCTCATGCTGTTATCAGTTGGAAATGAATCAGAGATTAGGAAGCGGGGGGAGTGGTGGGGGTGTTATCGCCCAGTGCACACGGGGCTCTCAGCTAATCTCTGGCGGCCCTGGGTCAT	030	regLM	4	0.753877	5.71423	-0.209175	0.877904	5.71424	0.0135961
gen_611	GTTTAGCGTAAGAATCAGGGTCCAGCTGGTGCTCCCTAAACAGCAGCTGCTGTTCACTGTTGAAAGGCGCTCTGGAAGGCCAGGTGCGGTGGCTCATGCTTGTAATCCCAGCACTGTGGGAGGCCGAGGTGGGCAGATCACCTGAGGTAAGGAGTTCGAGACCAGCCTGACCAACGTGGAGAAACCCCATCTCTCCTAAA	030	regLM	63	-0.0597851	2.19272	3.0903	-0.0159247	2.1927	0.577241
gen_612	GTTTAGCGTAAGAATCAGGGTCCAGCTGGTGCTCCCTAAACAGCAGCTGCTGTTCACTGTTGAAAGGCGCTCTGGAAGGCCAGGTGCGGTGGCTCATGTCTATAATCCCAGCACTGTGGGAGGCCGAGGTGGGCGGATCACCTGAGGTAAGGAGTTCGAGACCAGCCTGACCAACGTGGAGAAACCCCATCTCTCCTAAA	030	regLM	63	0.0719439	2.40133	3.35779	0.21247	2.4013	0.481469
gen_613	CCTAGAGACTCTGGGCACCACTGATAAGGGTGGGTACCAGGAACTCCACCCTTTACCGAGAAAGGCAGGCTGGTTTATCGCCACTCAGACCCAGCCAGCGACCACCCTGGGGAGTGTGTCAGCCACCAGGAGCATCGCTGTTGGGGAAATGTTATTAACTAGGAAGGAACTTTACAGAATGTTACACCCTATAACCAGCT	030	regLM	9	-0.230199	5.89721	-0.0144503	-0.0710856	5.8972	0.982507
gen_614	TCTCTGCTCCCCGGAGTCCCTGCACGTGGCTTGACAGTGGCCTTGGTAGGACCCACTGGGGTGTTTCTTCGTCGCCCATGGGCCCTCATGCTGTTATCAATTGGAAATGAATCAGAGATTAGGAAGCGGGGGGAGTGGTGGGGGTGTTATCGCCCAGTGCACACGGGGCTCTCAGCTAATCTCTGGCGGCCCTGGGTTTG	030	regLM	1	-0.00173392	5.30668	-0.228726	0.227606	5.3067	0.0863936
gen_615	CCTGAGAAAGGCTTCAACTAAAGAGCTATGGACAGGGACACTCTGTCACTTCCTGGGATTTTGACCCCCAGCTGTCCAACAGAGGAGGGTCTGTGCCTTTGCTCATTAGCCTAACTTAGATGATAGGTGACAAACTGAAATGAGCTATAGGGAGTTGTCCACTTCCAGGCTGCTATCAGTCCTTCAGATGTTTTTATTTT	030	regLM	15	-0.109713	1.72821	-0.442717	-0.184393	1.72825	-0.608517
gen_616	GTTTAGCGTAAGAATCAGGGTCCAGCTGGTGCTCCCTAAACAGCAGCTGCTGTTCACTGTTGAAAGGCGCTCTGGAAGGCCAGGCGCGGTGGCTCATGCTTGTAATCCCAGCACTGTGGGAGGCCGAGGTGGGCGGATCACCTGAGGTAAGGAGTTCGAGACCAGCCTGACCAACGTGGAGAAACCCTATCTCTACTAAA	030	regLM	63	0.427839	3.37826	3.9615	0.783872	3.37828	1.9339
gen_617	GTTTAGCGTAAGAATCAGGGTCCAGCTGGTGCTCCCTAAACAGCAGCTGCTGTTCACTGTTGAAAGGCGCTCTGGAAGGCCAGGTGCGGTGGCTCATGCTTGTAATCCCAGCACTGCGGGAGGCCGAGGTGGGCGGATCACCTGAGGTAAGGAGTTCGAGACCAGCCTGACCAACGTGGAGAAACCCCATCTCTCCTAAA	030	regLM	63	0.0911483	2.32367	3.03275	0.280603	2.32366	0.526077
gen_618	TCTCTGCTCCCCGGAGTCCCTGCACGTGGCTTGACAGTGGCCTTGGTAGGACCCACTGGGGTGTTTCTTCGTCGCCCATGGGCCCTCATGCTGTTATCAATTGGAAATGAATCAGAGATTAGGAAGCGGGGGGAGTGGTGGGGGTGTTATCGCCCAGTGCACACAGGTTACCACAGACATTTAGCCCTCACAGGAACCCT	030	regLM	22	0.169738	4.52321	-0.556715	0.0252555	4.52321	-0.356313
gen_619	CCATCTGTTCCATCCTCACCCACCCAAGGAGCCGCCCCTGCTCCTAGAGACTCTGGGCACCACTGATAAGGGTGGGTACCAGGAACTCCACCCTTTACCAAGAAAGGCAGGCTGGTTTATCGCCACTCAGACCCAGCCAGCAACCACCCTGGGGAGTGTGTCAGCCACCAGGAGCATCGCTGTTGGGGAATGGGTTGGTG	030	regLM	84	0.354504	7.50751	0.581128	0.0565625	7.50754	1.54965
gen_620	ATTAGCATGGAATTTGGACTTTGGAGCCATAATCCTGTTGTCTTCTTTCATTTAAAGAATATGGGCCGGGCGCGGTGGCTCACGCCTGTAATCCCAGCACTTTGGGAGGCCGAGGCGGGCAGATCACGAGGTCAGGAGATCGAGACCATCCTGGCTAACACAGTGAAACCCTGTCTCTACTAAAAATACAAAAAATTAGC	030	regLM	55	0.33297	3.53553	2.3187	1.21273	3.5355	2.54632
gen_621	CCTGAGAAAGGCTTCAACTAAAGAGCTATGGACAGGGACACTCTGTCACTTCCTGGGATTTTGACCCCCAGCTGTCCAACAGAGGAGGGTCTGTGCCTTCGCTCATTAGCCTAACTTAGATGATAGGTGACAAACTGAAATGAGCTATAGGGAGTTGTCCACTTCCAGGCTGCTATCACTGTCTCAGATACTGCCTGATT	030	regLM	14	0.0288678	1.05003	-0.423558	-0.1215	1.05007	-0.621115
gen_622	ATATTGGTACAGCACATTTGTCGCTATTAATAAACCAGTATCCAGGGCCAGGTGCAGTGGCTCACGCCTGTAATCCCAGCACTTTGGGAGGCCGAGGTGGGCGGATCACCTGAGGTCAGGAGTTCGAGACCAGCCTGACCAACATGGGAAAACCCTGTCTCTACTAAAAATACAAAATTAGCTGGGCATGGTGGTGCATA	030	regLM	47	-0.172111	3.19171	3.86289	0.300542	3.1918	2.02541
gen_623	TCTCTGCTCCCCAGAGTCCCTGCACGTGGCTTGACAGTGGCCTTGGTAGGACCCACTGGGGTGTTTCTTCGTCGCCCATGGGCCCTCATGCTGTTATCAGTTGGAAATGAATCAGAGATTAGGAAGCGGGGGGAGTGGTGGGGGTGTTATCGCCCAGTGCACACGGGGCTCTCAGCTAATCTCTGGCGGCCCTGGATGGC	030	regLM	5	0.691822	5.72462	-0.201116	0.822951	5.72462	0.100801
gen_624	ATTAGCATGGAATTTGGACTTTGGAGCCATAATCCTGTTGTCTTCTTTCATTTAAAGAATATGGGCCGGGCGCGGTGGCTCACGCCTGTAATCCCAGCACTTTGGGAGGCCAAGGCGGGCAGATCACGAGGTCAGGAGATCGAGACCATCCTGGCTAACACAGTGAAACCCTGTCTCTACTAAAAATACAAAAAATTAGC	030	regLM	56	0.228016	3.50467	2.16924	1.06859	3.50453	2.67583
gen_625	CCTGAGAAAGGCTTCAACTAAAGAGCTATGGACAGGGACACTCTGTCACTTCCTGGGATTTTGACCCCCAGCTGTCCAACAGAGGAGGGTCTGTGCCTTCGCTCATTAGCCTAACTTAGATGATAGGTGACAAACTGAAATGAGCTATAGGGAGTTGTCCACTTCCAGGCTGCTATCAGTACACCAGCTGCCTTGGCCAC	030	regLM	8	-0.00910284	3.52476	-0.475171	-0.197137	3.52458	-0.723831
gen_626	TCTCTGCTCCCCAGAGTCCCTGCACGTGGCTTGACAGTGGCCTTGGTAGGACCCACTGGGGTGTTTCTTCGTCGCCCATGGGCCCTCATGCTGTTATCAGTTGGAAATGAATCAGAGATTAGGAAGCGGGGGGAGTGGTGGGGGTGTTATCGCCCAGTGCACACGGGGCTCTCAGCTAATCTCTGGCGGCGCTGAAGGTG	030	regLM	6	0.620247	5.4375	-0.38198	0.507735	5.4375	-0.0842652
gen_627	CCAGTAATGGGATGGCTGGGTCCAATGGTATTTCTAGTTCTAGATCCCTGAGGAATTGCCACACTGACTTCCACAATGGTTGAACTAGTTTACAGTCCCGCCAACAGTGTAAAATTGTTCCTGTTTCTCCACATCCTCTCCAGCACCTGTTGTTTCCTGACTTTTTAATGATTGCCATTCTAACTGGTGTGAGATGGTAT	030	regLM	8	-0.471159	0.497673	-0.550152	-0.0661497	0.497614	-0.451349
gen_628	AGAATTGGAAGGAGCTTAGGGGAAAGCTAGCCTCAGGTCAGAATTGCCTGCATGCCACTCGGCTGGCTAGTGAGCTGCTGAATCACCTTATTCCTGGAGAAAGACTTTGATACTGAGAAAACTGACTTGCTCAGCTCTTGCTACAACTGTGACCATCTCTGCAACAGTTTTCTGTTGTTTAAGAGGTTTCTGTGATTGCT	030	regLM	94	0.120225	0.800776	0.607292	0.0115618	0.800805	0.572241
gen_629	ATATTGGTACAGCACATTTGTCGCTATTAATAAACCAGTATCCAGGGCCAGGTGCAGTGGCTCACGCTTGTAATCCCAGCACTTTGGGAGGCCGAGGCAGGTGGATCACCTGAGGTCAGGAGTTCGAGACCAGCCTGACCAACATGGGAAAACCCTGTCTCTACTAAAAATACAAAATTAGCTGGGCTTGGTGGTGCATG	030	regLM	49	-0.319239	2.62846	3.21838	-0.105026	2.6282	0.296908
gen_630	TCTCTGCTCCCCAGAGTCCCTGCACGTGGCTTGACAGTGGCCTTGGTAGGACCCACTGGGGTGTTTCTTCGTCGCCCATGGGCCCTCATGCTGTTATCAGTTGGAAATGAATCAGAGATTAGGAAGCGGGGGGAGTGGTGGGGGTGTTATCGCCCAGTGCACACAGGTTACCACAGAGGTCACACGGTAGGTGAGGGGGT	030	regLM	23	0.821659	4.82355	-0.977447	0.76929	4.82342	-0.546869
gen_631	CCTGAGAAAGGCTTCAACTAAAGAGCTATGGACAGGGACACTCTGTCACTTCCTGGGATTTTGACCCCCAGCTGTCCAACAGAGGAGGGTCTGTGCCTTCGCTCATTAGCCTAACTTAGATGATAGGTGACAAACTGAAATGAGCTATAGGGAGTTGTCCACTTCCAGGCTGCTATCACTGTCTCAGATGTTGTAATTTG	030	regLM	14	0.0207145	1.01733	-0.515556	-0.178167	1.01735	-0.646718
gen_632	TCTCTGCTCCCCGGAGTCCCTGCACGTGGCTTGACAGTGGCCTTGGTAGGACCCACTGGGGTGTTTCTTCGTCGCCCATGGGCCCTCATGCTGTTATCAGTTGGAAATGAATCAGAGATTAGGAAGCGGGGGGAGTGGTGGGGGTGTTATCGCCCAGTGCACACAGGTTACCACAGGACAGCCTGACTGCCAGGATTGCA	030	regLM	19	0.761429	4.28693	-0.568953	0.244094	4.28684	-0.322404
gen_633	GTTTAGCGTAAGAATCAGGGTCCAGCTGGTGCTCCCTAAACAGCAGCTGCTGTTCACTGTTGAAAGGCGCTCTGGAAGGCCAGGTGCGGTGGCTCATGCTTGTAATCCCAGCATTTTGGGAGGCCGAGGCAGGTGGATCACCTGAGGTAAGGAGTTCGAGACCAGCCTGACCAACGTGGAGAAACCCCATCTCTCCTAAA	030	regLM	63	-0.254988	2.21539	1.63618	-0.250241	2.21539	0.206585
gen_634	CCTCAGAATTAATGGAGAGGGCCAGTGGCGGCCTGTGCCCTTTGTCCCACCGGCCGGCCTGGGGGTGGCGGCTCCAGAATACAGGGTCCTATTGTGTGCCCTGATGTCAGGCAGCTGGACTGCTGGGAGTGAGGATAAACAAGCAGCTGGAGCATCTCGCCTGAAGCCCCAGGAGAGGGCCAGAGCCCCTGAAGAAGCAT	030	regLM	97	2.71704	0.0927008	1.29299	2.19206	0.0926788	1.40987
gen_635	CAGAATTTTAAGCGGCTCAATTTACTTTCGTGTTATTTTTAATAACAATGACCATAGTAATGCCTTTTCCCCCTTAAAATGTACAGGCTTATTCAAATAAAATGAGAAATGCCAATGGAATATACTCATCTGGGAAATTACATTTTAACGTCATAGCCAAGGAAAAATTGGAGCTGTATTTTGAAGTCAAAATTTTTTTC	030	regLM	96	0.490258	0.223123	2.81124	0.272563	0.222958	0.758216
gen_636	GTTTAGCGTAAGAATCAGGGTCCAGCTGGTGCTCCCTAAACAGCAGCTGCTGTTCACTGTTGAAAGGCGCTCTGGAAGGCCAGGTGCGGTGGCTCATGCTTGTAATCCCAGCACTGTGGGAGGCCGAGGTGGGCGGATCACCTGAGGTAAGGAGTTCGAGACCAGCCTGACCAACGTGGAGAAATCGCATCTCTACTAAA	030	regLM	63	0.0976333	2.21787	2.94489	0.319979	2.21782	0.810149
gen_637	TCTCTGCTCCCCAGAGTCCCTGCACGTGGCTTGACAGTGGCCTTGGTAGGACCCACTGGGGTGTTTCTTCGTCGCCCATGGGCCCTCATGCTGTTATCAGTTGGAAATGAATCAGAGATTAGGAAGCGGGGGGAGTGGTGGGGGTGTTATCGCCCAGTGCACACAGGGTCCCATTCATTCATTCATTCATTCATGCCATT	030	regLM	22	0.226063	3.98952	-0.976378	-0.0604368	3.98852	-0.259989
gen_638	GTTTAGCGTAAGAATCAGGGTCCAGCTGGTGCTCCCTAAACAGCAGCTGCTGTTCACTGTTGAAAGGCGCTCTGGAAGGCCAGGCGCGGTGGCTCATGCTTGTAATCCCAGCACTGTGGGAGGCCGAGGTGGGCGGATCACCTGAGGTAAGGAGTTCGAGACCAGCCTGACCGACATGGAGAAACCCCATCTCTCCTAAA	030	regLM	63	0.38283	3.04838	4.11901	0.647679	3.04845	1.8368
gen_639	GATTTTTCTACTGCTAGGTTTTCCTTTTGGGGTTACGATTATTACAGGTGGCAATCAGTTAACTTAGTGGTTCTGTAGGCACCGCCCTATCTTCCAACTCACTTACATTTAAAAATTCACACAGAGAGGCTAGTGGGAAGCGGGTAGGTGTAAACAATGTGCTACAGTGAGAATGAATGGAGAGCCTCCTGGGGGTCACA	030	regLM	100	0.570094	1.69519	0.00758504	0.159454	1.69514	0.271291
gen_640	TCTCTGCTCCCCAGAGTCCCTGCACGTGGCTTGACAGTGGCCTTGGTAGGACCCACTGGGGTGTTTCTTCGTCGCCCATGGGCCCTCATGCTGTTATCAGTTGGAAATGAATCAGAGATTAGGAAGCGGGGGGAGTGGTGGGGGTGTTATCGCCCAGTGCACACAGGTTACCACAGATGGAATAAGGGAAGCCAAGCGGG	030	regLM	22	0.693361	4.94631	-0.623825	0.221085	4.94633	-0.336958
gen_641	CCTGAGAAAGGCTTCAACTAAAGAGCTATGGACAGGGACACTCTGTCACTTCCTGGGATTTTGACCCCCAGCTGTCCAACAGAGGAGGGTCTGTGCCTTCGCTCATTAGCCTAACTTAGATGATAGGTGACAAACTGAAGTGAGCTATGGGGAGAGGTTGCCACAACTTAAATGTCATGGGGCTGGGACTTGGAGGAACT	030	regLM	28	0.0246935	0.426765	-0.415457	-0.155983	0.426625	-0.53724
gen_642	TCTCTGCTCCCCGGAGTCCCTGCACGTGGCTTGACAGTGGCCTTGGTAGGACCCACTGGGGTGTTTCTTCGTCGCCCATGGGCCCTCATGCTGTTATCAGTTGGAAATGAATCAGAGATTAGGAAGCGGGGGGAGTGGTGGGGGTGTTATCGCCCAGTGCACACAGGTTACCACAGGGCGCTTTCATTTCTCTCCACTTT	030	regLM	25	1.03829	5.173	-0.242756	0.668129	5.17303	0.0607509
gen_643	GATTTTTCTACTGCTAGGTTTTCCTTTTGGGGTTACGATTATTACAGGTGGCAATCAGTTAACTTAGTGGTTCTGTAGGCACCGCCCTATCTTCCAACTCACTTACATTTAAAAATTCACACAGAGAGGCTAGTGGGAAGCGGGTAGGTGTAAACAATGTGCTACAGTGAGAAACCCGAGGCATAAGAATGTAAAGCCAA	030	regLM	100	0.410522	1.18355	0.104697	0.233086	1.18349	0.255387
gen_644	GTTTAGCGTAAGAATCAGGGTCCAGCTGGTGCTCCCTAAACAGCAGCTGCTGTTCACTGTTGAAAGGCGCTCTGGAAGGCCAGGCGCGGTGGCTCATGTCTGTAATCCCAGCACTGTGGGAGGCCGAGGTGGGCGGATCACCTGAGGTAAGGAGTTCGAGACCAGCCTGACCAACGTGGAGAAACCCCATCTCTCCTAAA	030	regLM	63	0.296354	2.89013	4.0635	0.56718	2.89031	2.09969
gen_645	CCAGTAATGGGATGGCTGGGTCCAATGGTATTTCTAGTTCTAGATCCCTGAGGAATTGCCACACTGACTTCCACAATGGTTGAACTAGTTTACAGTCCCACCAACAGTGTAAAATTATTCCTATTTCTCCACATCCTCTCCAGCACCTGTTGTTTCCTGACTTTTTAATGATCGCTATTCTAACTGGTGTGAGATGGTAT	030	regLM	6	-0.614261	0.0420501	-0.469615	-0.235381	0.0422195	-0.538099
gen_646	AGAATTGGAAGGAGCTTAGGGGAAAGCTAGCCTCAGGTCAGAATTGCCTGCATGCCACTCGGCTAGTGAGCTGCTGAATCACCTTATTCCTGGAGAAAGATTTTGTTTTTTATTTTATTTTATTTTATTTTATTTTATTTTATTTTATTTTATTTTATTTTATTTTATTTTACTTTAAGATGAAGTCTCACTCTGTCACC	030	regLM	96	0.242886	0.429009	0.782881	0.357106	0.429051	1.08081
gen_647	TCTCTGCTCCCCGGAGTCCCTGCACGTGGCTTGACAGTGGCCTTGGTAGGACCCACTGGGGTGTTTCTTCGTCGCCCATGGGCCCTCATGCTGTTATCAGTTGGAAATGAATCAGAGATTAGGAAGCGGGGGGAGTGGTGGGGGTGTTATCGCCCAGTGCACACGGGGCTCTCAGCTAAGGTCAAGCTGGAGCAGCACAG	030	regLM	14	0.819738	5.65345	-0.318056	0.419121	5.6534	0.00692024
gen_648	GTTTAGCGTAAGAATCAGGGTCCAGCTGGTGCTCCCTAAACAGCAGCTGCTGTTCACTGTTGAAAGGCGCTCTGGAAGGCCAGGTGCGGTGGCTCATGCTTGTAATCCCAGCACTGTGGGAGGCCGAGGTGGGCGGATCACCTGAGGTAAGGAGTTCGAGGCCAGCCTGTCCAACGTGGAGAAACCCCATCTCTCCTAAA	030	regLM	63	0.0670994	2.20603	2.9851	0.235786	2.20602	0.235451
gen_649	TGCACCCCCCCATCATTTTCTTCATTTGTATAATGAGGCTAATACCATGTGTACAACACCGCCGAAATGTACTGGCAGCTCCATATTTCCTTCTCTTATCTCATATTCATCTTTCCACATCTCCCATGAGAGTTTCTCAAGCTGATTAAATTCCTATCCAACATATGTCAGATACATAATTTCAAAAAACAAGGTCATTT	030	regLM	96	-0.142914	0.169429	1.35271	0.0350281	0.169375	-0.456837
gen_650	TCTCTGCTCCCCGGAGTCCCTGCACGTGGCTTGACAGTGGCCTTGGTAGGACCCACTGGGGTGTTTCTTCGTCGCCCATGGGCCCTCATGCTGTTATCAGTTGGAAATGAATCAGAGATTAGGAAGCGGGGGGAGTGGTGGGGGTGTTATCGCCCAGTGCACACAGGTTACCACAGACATTTAGCCCTCAGAGTTGGGGA	030	regLM	22	0.689818	5.03245	-0.684247	0.279849	5.03243	-0.294666
gen_651	CTAGCTGTACCAGCCGCTGCCCCGGACCTGCTGCCCTGCCCCACCCCCCCCTCCCCTGGCCAGCCTCCCCAGAGGCCAGAAGGCGCCTTATCGGGCAGGGTTAAGGAGGGGGACAGTTATCAGGGGCTGCAGCCTAGATTGGGCCACAATGTCCTCGTCTCTTGAGGGTGGCAGGCTGTGCAGGCTCCCTGACCAGCAGA	030	regLM	7	0.671985	4.74873	1.04405	0.339572	4.74875	0.923593
gen_652	CCTGAGAAAGGCTTCAACTAAAGAGCTATGGACAGGGACACTCTGTCACTTCCTGGGATTTTGACCCCCAGCTGTCCAACAGAGGAGGGTCTGTGCCTTTGCTCATTAGCCTAACTTAGATGATAGGTGACAAACTGAAGTGAGCTATGGGGAGAGGTACCTCATTTATCTGTTGCTGGGTGTGTCACAGCAGGGGATGA	030	regLM	24	-0.104825	1.99	-0.953156	-0.260398	1.98997	-0.92672
gen_653	TCTCTGCTCCCCAGAGTCCCTGCACGTGGCTTGACAGTGGCCTTGGTAGGACCCACTGGGGTGTTTCTTCGTCGCCCATGGGCCCTCATGCTGTTATCAATTGGAAATGAATCAGAGATTAGGAAGCGGGGGGAGTGGTGGGGGTGTTATCGCCCAGTGCACACGGGGCTCTCAGCTAATCTCTGGCGGCCCTGGGTTTG	030	regLM	1	-0.00556304	5.36345	-0.226865	0.223295	5.36341	0.095659
gen_654	CCCGAATACTGTGCTTTTCCGACGGGCTTAGGAAACGGCACACCAGGATATTATATCCTGCACCTGGCTCGGAGGGTCCTACGTGCACGGAGTCTCGCTGATTGCTAGCACAGAAGTCTGAGATCAAACTGCAAGGCGGCAGCGAGGCTGGGGGAGGGGTGCCCGCCATTGCCCAGGCTTGCGTTGTTTTGAGAAGGATA	030	regLM	99	0.627949	-0.0314372	1.10922	1.66577	-0.0313982	0.171985
gen_655	ATTATGATACAGTCCAAGTATGTAACTTTCTGGGGACCAGACTTTGCTGAGAGTCATAATGGAGAGTCAAAGAGTCTGATGGCTGAGAGGGATGTGCCTGGGCTTGCCTTCATAAATGTTCATTGTCTCAGCCAAGGTTTTGGCAGGAGCGAGAGCAGGCTCAGATCAGTGTCACATGGAAGTTAGAGTTCAGTGTGTGG	030	regLM	94	2.44029	0.251457	6.1806	2.46688	0.251421	4.37401
gen_656	GTTTAGCGTAAGAATCAGGGTCCAGCTGGTGCTCCCTAAACAGCAGCTGCTGTTCACTGTTGAAAGGCGCTCTGGAAGGCCAGGTGCGGTGGCTCATGCTTGTAATCCCAGCACTGTGGGAGGCCGAGGTGGGCGGATCACCTGAGGCAGGGAGTTCGAGACCAGCCTGACCAACGTGGAGAAACCCCATCTCTCCTAAA	030	regLM	63	0.112431	2.29858	2.90142	0.295167	2.29858	0.374784
gen_657	AGAAAAAAACAAACAACCCCATCAACAAGTGGGCGAAGGATATGAACAGACACTTCTCAAAAGAAGATATTTATTCAACCAAAAGACACATGAAAAAATGCTCATCATCACTGGCCATCAGAGAAATGCAAATCAAAACCACAATGAGATACCATCTCATACCAGTTAGAATGGCGATCATTGAAAAGTCAGGAAGCAAC	030	regLM	46	-0.510732	0.908407	0.142753	-0.234225	0.908521	-0.354345
gen_658	AGAATTGGAAGGAGCTTAGGGGAAAGCTAGCCTCAGGTCAGAATTGCCTGCATGCCACTCGGCTGGCTAGTGAGCTGCTGAATCACCTTATTCCTGGAGAAAGACTTTGATACTGAGAAAACTGACTTGCTCAGCTCTTGCTACAACTGTGACCATCTCTGCAACAGTCAGGTCATGGGATTTTCCAGACTCTGTGGGTG	030	regLM	95	0.623833	1.18387	2.01618	0.448788	1.18385	1.18461
gen_659	TCTCACCACTCCTATTCAACATAGTGTTGGAAGTTCTGGACAGGGCAATCAGGCAAGAGAAAGAAAGAAAGAAAGAAAGAAAGAAAGAAAGAAAGAAAGAAAGAAAGAAAGAAAGAAAGAAAGAAAGAAAGAAAGAAAGAAAGAAAGAAAGAAAGAAAGAAAGAAAGAAAGAAAGAAAGAAAGAAAGAAAGAAAGAAAAT	030	regLM	74	-0.166996	0.254863	0.448262	-0.164688	0.254958	-0.12575
gen_660	TCTCTGCTCCCCAGAGTCCCTGCACGTGGCTTGACAGTGGCCTTGGTAGGACCCACTGGGGTGTTTCTTCGTCGCCCATGGGCCCTCATGCTGTTATCAGTTGGAAATGAATCAGAGATTAGGAAGCGGGGGGAGTGGTGGGGGTGTTATCGCCCAGTGCACACAGGTTACCACAGACATTTAGCCCTTTATCAGATCCA	030	regLM	24	0.707445	5.21926	-0.634362	0.608075	5.21928	-0.362003
gen_661	GATTTTTCTACTGCTAGGTTTTCCTTTTGGGGTTACGATTATTACAGGTGGCAATCAGTTAACTTAGTGGTTCTGTAGGCACCGCCCTATCTTCCAACTCACTTACATTTAAAAATTCACACAGAGAGGCTAGTGGGAAGCGGGTAGGTGTAAACAATGTGCTACAGTGAGTCACACCCGTCACAGAACAACAGTGTGGG	030	regLM	100	2.44977	3.66671	0.227621	2.18476	3.66653	0.909074
gen_662	CCATCTGTTCCATCCTCACCCACCCAAGGAGCCGCCCCTGCTCCTAGAGACTCTGGGCACCACTGATAAGGGTGGGTACCAGGAACTCCACCCTTTACCGAGAAAGGCAGGCTGGTTTATCGCCACTCAGACCCAGCCAGCGACCACCCTGGGGAGTGTGTCAGCCACCAGGAGCATCGCTGTTGGGGAGTGGGTTGGGT	030	regLM	84	-0.0626344	7.29187	0.565508	0.00279703	7.29184	1.23285
gen_663	TCTCTGCTCCCCAGAGTCCCTGCACGTGGCTTGACAGTGGCCTTGGTAGGACCCACTGGGGTGTTTCTTCGTCGCCCATGGGCCCTCATGCTGTTATCAGTTGGAAATGAATCAGAGATTAGGAAGCGGGGGGAGTGGTGGGGGTGTTATCGCCCAGTGCACACGGGGCTCTCAGCTAATCTCTGGCGGCCCTGGGTCAA	030	regLM	4	0.76078	5.77898	-0.217042	0.898433	5.77895	0.0231922
gen_664	ATTAGCATGGAATTTGGACTTTGGAGCCATAATCCTGTTGTCTTCTTTCATTTAAAGAATATGGGCCAGGCGCGGTGGCTCACGCCTGTAATCCCAGCACTTTGGGAGGCCGAGGCAGGTGGATCATGAGGTCAGGAGATCGAGACCATCCTGGCTAACACAGTGAAACCCTGTCTCTACTAAAAATACAAAAAAATTAG	030	regLM	59	0.0586732	2.9625	1.11503	0.678519	2.96248	1.49588
gen_665	TTTTGTTCTCTTACATGTTGCCTATGGTATTATAAGAATTGAAAGAAGGCCAGGCGCAGTGGCTCACACCTGTAATCCCAGCACTTTGGGAGGCTGAGGCGGGCAGATCACTTGAGGTCAGCAGTTCGAGACCAGCCTGGCCAACATGGTGAAACCCCATCTCTACTAAAAATACAAAAATTAGCCAGGCATGGTGGTGC	030	regLM	46	-0.152667	3.46525	3.54575	0.196516	3.46561	0.856778
gen_666	CCTGAGAAAGGCTTCAACTAAAGAGCTATGGACAGGGACACTCTGTCACTTCCTGGGATTTTGACCCCCAGCTGTCCAACAGAGGAGGGTCTGTGCCTTTGCTCATTAGCCTAACTTAGATGATAGGTGACAAACTGAAGTGAGCTATAGGGAGTTGTCCACTTCCAGGCTGCTATCAGTACACCAGCTGCCTTGGCCTC	030	regLM	8	0.0749921	4.05812	-0.628343	-0.169811	4.05831	-0.826229
gen_667	CCTCAGAATTAATGGAGAGGGCCAGTGGCGGCCTGTGCCCTTTGTCCCACTGGCCGGCCTGGGGGTGGCGGCTCCAGAATACAGGGTCCTATTGTGTGCCCTGATGTCAGGCAGCTGGACTGCTGGGAGTGAGGATAAACAAGCAGCTGGAGCATCTCGCCTGAAGCCCCAGGAGAGGGCCAGAGCCCCTGCAGCAGCCG	030	regLM	96	3.13879	0.124007	1.57124	2.42751	0.124041	1.39346
gen_668	ATTAGCATGGAATTTGGACTTTGGAGCCATAATCCTGTTGTCTTCTTTCATTTAAAGAATATGGGCCAGGCGCGGTGGCTCACACCTGTAATCCCAGCACTTTGGGAGGCCGAGGCAGGTGGATCACGAGGTCAGGAGATCGAGACCATCCTGGCTAACACAGTGAAACCCTGTCTCTACTAAAAATACAAAAAAATTAG	030	regLM	60	-0.0721227	2.55397	0.597298	0.466202	2.55402	1.25353
gen_669	ACAAAAAAACAAACAACCCCATCAACAAGTGGGCGAAGGATATGAACAGACACTTCTCAAAAGAAGATATTTATGCAGCCAACAAACATATGAAAAAATGCTCATCATCACTGGCCATCAGAGAAATGCAAATCAAAACCACAATGAGATACCATCTCACACCAGTTAGAATGGCGATCATTGAAAAGTCAGGAAGCAAC	030	regLM	39	-0.41838	0.772861	-0.0569625	-0.162922	0.772797	-0.370248
gen_670	CCTGAGAAAGGCTTCAACTAAAGAGCTATGGACAGGGACACTCTGTCACTTCCTGGGATTTTGACCCCCAGCTGTCCAACAGAGGAGGGTCTGTGCCTTCGCTCATTAGCCTAACTTAGATGATAGGTGACAAACTGAAATGAGCTATAGGGAGTTGTCCACTTCCAGGCTGCTATCACTGTCTCAGATGTTGTAATTTT	030	regLM	14	0.0149279	1.00964	-0.487515	-0.184125	1.00954	-0.64217
gen_671	TCTCTGCTCCCCAGAGTCCCTGCACGTGGCTTGACAGTGGCCTTGGTAGGACCCACTGGGGTGTTTCTTCGTCGCCCATGGGCCCTCATGCTGTTATCAGTTGGAAATGAATCAGAGATTAGGAAGCGGGGGGAGTGGTGGGGGTGTTATCGCCCAGTGCACACAGGTTACCACAGACATTTAGCCCTCACTGTAGCTTG	030	regLM	21	0.884643	5.19064	-0.509464	0.4987	5.19068	-0.184276
gen_672	GTTTAGCGTAAGAATCAGGGTCCAGCTGGTGCTCCCTAAACAGCAGCTGCTGTTCACTGTTGAAAGGCGCTCTGGAAGGCCAGGTGCGGTGGCTCATGCTTGTAATCGCAGCACTTTGGGAGGCCGAGGTGGGCGGATCACCTGAGGTAAGGAGTTCGAGACCAGCCTGACCAACGTGGAGAAACCCCATCTCTCCTAAA	030	regLM	62	0.0131889	2.70132	3.89767	0.175583	2.70123	1.50127
gen_673	ATTAGCATGGAATTTGGACTTTGGAGCCATAATCCTGTTGTCTTCTTTCATTTAAAGAATATGGGCCGGGCGCGGTGGCTCACACCTGTAATCCCAGCACTTTGGGAGGCCGAGGCAGGTGGATCACGAGGTCAGGAGATCGAGACCATCCTGGCTAACACAGTGAAACCCTGTCTCTACTAAAAATACAAAAAATTAGC	030	regLM	59	-0.0478341	2.59	0.531222	0.586487	2.58997	1.22054
gen_674	ATATTGGTACAGCACATTTGTCGCTATTAATAAACCAGTATCCAGGGCCAGGTGCAGTGGCTCACGCCTGTAATCCCAGCACTTTGGGAGGCCGAGGTGGGCGGATCACCTGAGGTCAGGAGTTCGAGACCAGGCTGACCAACATGGGAAAACCCTGTCTCTACTAAAAATACAAAATTAGCTGGGCTTGGTGGTGCATG	030	regLM	48	-0.169226	2.94039	2.8908	0.17173	2.9401	1.26742
gen_675	GAAAGGATACTCTGGCTGTCATGTGGACTGGAGGGAGCTGGAATTGAGGCAGTGAGCCCAGCTACCAGAGTCTTGAAATAGTTTAGTGTAAGATGCTGAATCATGAGTTGGGGCAGAGAGGATAACAAAGTAGGGAAGTGGGGGTAGAGACAGTCGTAAGACCTGAGGAGGGAATGGGGGAACAAGGAGACATTGAGGAG	030	regLM	95	0.0203055	2.01605	0.627944	-0.0312086	2.01621	0.236847
gen_676	CCTGAGAAAGGCTTCAACTAAAGAGCTATGGACAGGGACACTCTGTCACTTCCTGGGATTTTGACCCCCAGCTGTCCAACAGAGGAGGGTCTGTGCCTTCGCTCATTAGCCTAACTTAGATGATAGGTGACAAACTGAAATGAGCTATAGGGAGTTGTCCACTTCCAGGCTGCTATCAGTATACCAGCTGGGGTATGGCA	030	regLM	2	-0.187457	0.798974	-0.47511	-0.194695	0.798876	-0.708322
gen_677	AGAAAAAAACAAACAACCCCATCAACAAGTGGGTGAAGGATATGAACAGACACTTCTCAAAAGAAGATATTTATTCAACCAAAAGACACATGAAAAAATGCTCATCATCACTGGCCATCAGAGAAATGCAAATCAAAACCACAATGAGATACCATCTCACACCAGTTAGAATGGCGATCATTAAAAAGTCAGGAAGCAAC	030	regLM	43	-0.486381	0.717638	-0.0474186	-0.180256	0.717773	-0.34801
gen_678	CCTGAGAAAGGCTTCAACTAAAGAGCTATGGACAGGGACACTCTGTCACTTCCTGGGATTTTGACCCCCAGCTGTCCAACAGAGGAGGGTCTGTGCCTTTGCTCATTAGCCTAACTTAGATGATAGGTGACAAACTGAAGTGAGCTATGGGGAGAGGTACCTCATTTATCTGTTGCTGGGTGTTGAATAATGTCCAGCAT	030	regLM	28	-0.242045	0.165414	-0.652008	-0.30364	0.165416	-0.802715
gen_679	CCAGTAATGGGATGGCTGGGTCCAATGGTATTTCTAGTTCTAGATCCCTGAGGAATCGCCACACTGACTTCCACAATGGTTGAACTAGTTTACAGTCCCACCAACAGTGTAAAATTATTCCTATTTCTCCACATCCTCTCCAGCACCTGTTGTTTCCTGCCTTTTTTGTTTGTTTTTTTTTGTATATATATATATATATA	030	regLM	23	-0.295474	0.00840814	-0.414632	0.0496479	0.0084562	-0.129673
gen_680	AGAATTGGAAGGAGCTTAGGGGAAAGCTAGCCTCAGGTCAGAATTGCCTGCATGCCACTCGGCTAGTGAGCTGCTGAATCACCTTATTCCTGGAGAAAGATTTTGTTTTTTTCTTACAGATGCATTTGAGGCTGGGCATGGTGGCTCACGCCTGTAATCCCAGCACTTTGGGAGGCCGAGGCGGGTGGATCACTTGAGGT	030	regLM	91	0.324163	0.321533	0.592476	0.388249	0.321511	0.549562
gen_681	TCTCTGCTCCCCAGAGTCCCTGCACGTGGCTTGACAGTGGCCTTGGTAGGACCCACTGGGGTGTTTCTTCGTCGCCCATGGGCCCTCATGCTGTTATCAATTGGAAATGAATCAGAGATTAGGAAGCGGGGGGAGTGGTGGGGGTGTTATCGCCCAGTGCACACGGGGCTCTCAGCTAATCTCTGGCGGCTCTGGAATAT	030	regLM	5	0.00412051	5.19387	-0.25572	0.122417	5.19389	-6.04e-05
gen_682	GATTTTTCTACTGCTAGGTTTTCCTTTTGGGGTTACGATTATTACAGGTGGCAATCAGTTAACTTAGTGGTTCTGTAGGCACCGCCCTATCTTCCAACTCACTTACATTTAAAAATTCACACAGAGAGGCTAGTGGGAAGCGGGTAGGTGTAAACAATGTGCTACAGTGAGAATCCAGGGGCCTCTCTGGGGGGCAGCAG	030	regLM	101	0.713736	1.66999	0.0432176	0.473925	1.67001	0.376916
gen_683	CCTGAGAAAGGCTTCAACTAAAGAGCTATGGACAGGGACACTCTGTCACTTCCTGGGATTTTGACCCCCAGCTGTCCAACAGAGGAGGGTCTGTGCCTTCGCTCATTAGCCTAACTTAGATGATAGGTGACAAACTGAAGTGAGCTATGGGGAGAGGCACCCCTGGTTTCCAGACACTGCCTGTTATCACAGACCATTAC	030	regLM	28	0.016304	1.02533	-0.566749	-0.230263	1.02526	-0.616026
gen_684	CATTCCATTCCATTCCATTCTGCATTCTGTTCCATTCTCCATTCCATTCCATTCTCCATACCATCCTCCATTCCATTACACTGCATTCCATTCTCCATTCTATTTTATTCACCACGGCATTCCATTACATTTTCCATTCCATTCTATTCTCCATTCCATTCCATATTCTATTCCTTTCTCCATTCCATTCCCCTTTCCAT	030	regLM	91	-0.961753	-0.43557	3.69181	-0.369598	-0.435588	-0.867754
gen_685	TCTCTGCTCCCCAGAGTCCCTGCACGTGGCTTGACAGTGGCCTTGGTAGGACCCACTGGGGTGTTTCTTCGTCGCCCATGGGCCCTCATGCTGTTATCAGTTGGAAATGAATCAGAGATTAGGAAGCGGGGGGAGTGGTGGGGGTGTTATCGCCCAGTGCACACAGGTTACCACAGACATTTATCACTGGCCAAGGCGGC	030	regLM	21	0.75449	5.68452	-0.520135	0.564638	5.68449	-0.15713
gen_686	GTTTAGCGTAAGAATCAGGGTCCAGCTGGTGCTCCCTAAACAGCAGCTGCTGTTCACTGTTGAAAGGCGCTCTGGAAGGCCAGGTGCGGTGGCTCATGCTTGTAATCCCAGCACTGTGGGAGGCCGAGGTGGGCGAATCACCTGAGGCAGGGAGTTCGAGACCAGCCTGACCAACGTGGAGAAACCCCATCTCTCCTAAA	030	regLM	64	-0.0809719	2.01315	3.19085	-0.00222282	2.01322	0.138662
gen_687	AACAAAAAACAAACAACCCCATCAACAAGTGGGCGAAGGATATGAACAGACACTTCTCAAAAGAAGATATTTATTCAACCAAAAGACACATGAAAAAATGCTCATCATCACTGGCCATCAGAGAAATGCAAATCAAAACCACAATGAGATACCATCTCACACCAGTTAGAATGGCGATCATTGAAAAGTCAGGAAGCAAC	030	regLM	44	-0.45838	1.06949	0.074753	-0.163334	1.06964	-0.37768
gen_688	TCTCTGCTCCCCAGAGTCCCTGCACGTGGCTTGACAGTGGCCTTGGTAGGACCCACTGGGGTGTTTCTTCGTCGCCCATGGGCCCTCATGCTGTTATCAGTTGGAAATGAATCAGAGATTAGGAAGCGGGGGGAGTGGTGGGGGTGTTATCGCCCAGTGCACACAGGTTACCACAGAGGTCACACGGTAGGTGAGGGGAA	030	regLM	23	0.943463	4.87646	-1.02435	0.942938	4.87651	-0.532845
gen_689	AGAATTGGAAGGAGCTTAGGGGAAAGCTAGCCTCAGGTCAGAATTGCCTGCATGCCACTCGGCTGGCTAGTGAGCTGCTGAATCACCTTATTCCTGGAGAAAGACTTTGATACTGAGAAAACTGACTTGCTCAGCTCTTGCTACAACTGTGACCATCTCTGCAACAGTTTTATCTTTGGAATCTTTTTAACATTTAACTT	030	regLM	92	0.266283	1.33279	0.524349	0.134994	1.33276	0.500002
gen_690	TCTCTGCTCCCCGGAGTCCCTGCACGTGGCTTGACAGTGGCCTTGGTAGGACCCACTGGGGTGTTTCTTCGTCGCCCATGGGCCCTCATGCTGTTATCAGTTGGAAATGAATCAGAGATTAGGAAGCGGGGGGAGTGGTGGGGGTGTTATCGCCCAGTGCACACAGGTTACCACAGACACCTATCAGTCAATAAGGTCAA	030	regLM	23	0.572976	4.71325	-1.089	0.316759	4.71321	-0.790433
gen_691	CCTGAGAAAGGCTTCAACTAAAGAGCTATGGACAGGGACACTCTGTCACTTCCTGGGATTTTGACCCCCAGCTGTCCAACAGAGGAGGGTCTGTGCCTTCGCTCATTAGCCTAACTTAGATGATAGGTGACAAACTGAAATGAGCTATAGGGAGTTGTCCACTTCCAGGCTGCTATCAGTATACCAGCTGGGGTGTGGCC	030	regLM	2	0.192544	4.73026	-0.134077	-0.0867372	4.73031	-0.505694
gen_692	TCTCTGCTCCCCAGAGTCCCTGCACGTGGCTTGACAGTGGCCTTGGTAGGACCCACTGGGGTGTTTCTTCGTCGCCCATGGGCCCTCATGCTGTTATCAGTTGGAAATGAATCAGAGATTAGGAAGCGGGGGGAGTGGTGGGGGTGTTATCGCCCAGTGCACACAGGTTACCACAGAGGTCACACGGTAGGTGAGTGGTC	030	regLM	22	0.770422	4.55773	-0.996439	0.702442	4.55767	-0.573841
gen_693	GATTTTTCTACTGCTAGGTTTTCCTTTTGGGGTTACGATTATTACAGGTGGCAATCAGTTAACTTAGTGGTTCTGTAGGCACCGCCCTATCTTCCAACTCACTTACATTTAAAAATTCACACAGAGAGGCTAGTGGGAAGCGGGTAGGTGTAAACAATGTGCTACAGTGAGAAACCTGGGGCATTTTCCAAGATGCCAGG	030	regLM	101	0.333132	0.462432	0.320518	0.110739	0.462477	0.147416
gen_694	CTGGCTGTTTCCTGACTTTTTAATGATCGCCATTCTAACTGGTGGGAGATGGTATCTCATTGTGGTTTTGATTTGCATTTCTCTGATGGCCAGTGATGATGAGCATTTTTTCATGTGTCTCTTGGCTGCATACATGTCTTCTTTTGAGAAGAAACACTTTGCTTTTTAAGGTTACATTTTCAGGATTTCAAGCATCCTGT	030	regLM	42	-0.11287	0.346184	0.544883	0.168733	0.346104	0.0441104
gen_695	TCCTGAATGGGCAAAAACTGGAAGCATTCCCTTTGAAAACTGGCACAAGACGGGGATGCCCTCTCTCACCGCTCCTATTCAACATAGTGTTGGAAGTTCTGGCCAGGGCAATCAGGCAGGAGAAATAAATAAAGGGTATTCAATTAGGAAAAGAGGAAGTCAAATTGTCCCTGTTTGCAGATGACATGACTGTATATCTG	030	regLM	20	-0.133932	0.563549	-0.477062	0.350891	0.563728	-0.0842252
gen_696	TGCACCCCCCCATCATTTTCTTCATTTGTATAATGAGGCTAATACCATGTGTACAACACCGCCGAAATGTACTGGCAGCTCCATATTTCCTTCTCTTATCTCATATTCATCTTTCCACATCTCCCATGAGAGTTTCTCAAGCTGATTAAATTCCTATCCAACATATGTCAGATACATAATTTCAAAACAAGGTTCTTCTC	030	regLM	97	-0.177067	0.22425	1.30006	-0.0375774	0.224243	-0.518169
gen_697	CCTGAGAAAGGCTTCAACTAAAGAGCTATGGACAGGGACACTCTGTCACTTCCTGGGATTTTGACCCCCAGCTGTCCAACAGAGGAGGGTCTGTGCCTTCGCTCATTAGCCTAACTTAGATGATAGGTGACAAACTGAAGTGAGCTATGGGGAGAGGTACCTCATTTATCTGTTGCTGGGTGTGTCACAGCAGGGGATGT	030	regLM	25	-0.0952658	2.08879	-0.761796	-0.206097	2.08875	-0.863475
gen_698	GTTTAGCGTAAGAATCAGGGTCCAGCTGGTGCTCCCTAAACAGCAGCTGCTGTTCACTGTTGAAAGGCGCTCTGGAAGGCCAGGTGCGGTGGCTCATGCTTGTAATCCCAGCACTGTGGGAGGCCGAGGTGGGCGGATCACCTGAGGTAAGGAGTTCGAGACCAGCCTGACTAACATGGAGAAACCCCATCTCTCCTAAA	030	regLM	62	0.200592	2.6015	3.10879	0.435675	2.60168	0.737704
gen_699	CATTCCATTCCATTCCATTCTGCATTCTGTTCCATTCTCCATTCCATTCCATTCTCCATACCATCCTCCATTCCATTACACTGCATTCCATTCTCCATTATATTTTATTCACCACGGCATTCCATTACATTTTCCATTCCATTCTATTCTCCATTCCATTCCATATTCTATTCCCCTTTCCATTCCATTCCCCTTTCCAT	030	regLM	90	-0.84848	-0.420363	3.55959	-0.355915	-0.420317	-0.873918
gen_700	CCTGAGAAAGGCTTCAACTAAAGAGCTATGGACAGGGACACTCTGTCACTTCCTGGGATTTTGACCCCCAGCTGTCCAACAGAGGAGGGTCTGTGCCTTTGCTCATTAGCCTAACTTAGATGATAGGTGACAAACTGAAGTGAGCTATAGGGAGTTGTCCACTTCCAGGCTGCTATCAGTATACCAGCTGGGCTGCTGGC	030	regLM	3	-0.0661919	1.43909	-0.420027	-0.185649	1.43912	-0.766447
gen_701	CCTGAGAAAGGCTTCAACTAAAGAGCTATGGACAGGGACACTCTGTCACTTCCTGGGATTTTGACCCCCAGCTGTCCAACAGAGGAGGGTCTGTGCCTTTGCTCATTAGCCTAACTTAGATGATAGGTGACAAACTGAAGTGAGCTATAGGGAGTTGTCCACTTCCAGGCTGTTATCCATCCAGCCTGTCACCACTGGGG	030	regLM	15	0.040309	0.869675	-0.672446	-0.14806	0.86969	-0.837991
gen_702	CCTGAGAAAGGCTTCAACTAAAGAGCTATGGACAGGGACACTCTGTCACTTCCTGGGATTTTGACCCCCAGCTGTCCAACAGAGGAGGGTCTGTGCCTTTGCTCATTAGCCTAACTTAGATGATAGGTGACAAACTGAAATGAGCTATAGGGAGTTGTCCACTTCCAGGCTGCTATCAGTATACCAGCTTCCTTGCTGGG	030	regLM	8	-0.0965119	1.22378	-0.347071	-0.11467	1.22383	-0.640077
gen_703	CCTGAGAAAGGCTTCAACTAAAGAGCTATGGACAGGGACACTCTGTCACTTCCTGGGATTTTGACCCCCAGCTGTCCAACAGAGGAGGGTCTGTGCCTTCGCTCATTAGCCTAACTTAGATGATAGGTGACAAACTGAAGTGAGCTATGGGGAGAGGTTGCCACAACCTCAGCTTTCCAGAGGCCATGCCTGGGCTTGTG	030	regLM	23	1.37996	0.0279233	1.80411	1.59128	0.0278903	1.46153
gen_704	CCCGAATACTGTGCTTTTCCGACGGGCTTAGGAAACGGCACACCAGGATATTATATCCTGCACCTGGCTCGGAGGGTCCTACGTGCACGGAGTCTCGCTGATTGCTAGCACAGAAGTCTGAGATCAAACTGCAAGGCGGCAGCGAGGCTGGGGGAGGGGTGCCCGCCATTGCCCAGGCTTGCTTAGGTAAACAAAGCAGC	030	regLM	98	1.08396	0.208055	1.52872	2.16637	0.208178	0.365175
gen_705	GTTTAGCGTAAGAATCAGGGTCCAGCTGGTGCTCCCTAAACAGCAGCTGCTGTTCACTGTTGAAAGGCGCTCTGGAAGGCCAGGCGCGGTGGCTCATGCTTGTAATCCCAGCACTGTGGGAGGCCAAGGTGGGCGGATCACCTGAGGTAAGGAGTTCGAGACCAGCCTGACCAACGTGGAGAAACCCCATCTCTCCTAAA	030	regLM	64	0.284483	2.8849	4.00921	0.498061	2.88511	1.61747
gen_706	CCTCAGAATTAATGGAGAGGGCCAGTGGCGGCCTGTGCCCTTTGTCCCACTGGCCGGCCTGGGGGTGGCGGCTCCAGAATACAGGGTCCTATTGTGTGCCCTGATGTCAGGCAGCTGGACTGCTGGGAGTGAGGATAAACAAGCAGCTGGAGCATCTCGCCTGAAGCCCCAGGAGAGGGCCAGAGCCCCCGCCCCAGCTG	030	regLM	96	3.05518	0.267588	1.6144	2.57103	0.267544	1.37984
gen_707	CCTGAGAAAGGCTTCAACTAAAGAGCTATGGACAGGGACACTCTGTCACTTCCTGGGATTTTGACCCCCAGCTGTCCAACAGAGGAGGGTCTGTGCCTTCGCTCATTAGCCTAACTTAGATGATAGGTGACAAACTGAAATGAGCTATAGGGAGTTGTCCACTTCCAGGCTGCTATCAGTCCATCCGGTCCCCAGCAGGG	030	regLM	15	0.388426	3.05668	-0.29035	-0.0793636	3.05637	-0.394025
gen_708	CCTGAGAAAGGCTTCAACTAAAGAGCTATGGACAGGGACACTCTGTCACTTCCTGGGATTTTGACCCCCAGCTGTCCAACAGAGGAGGGTCTGTGCCTTTGCTCATTAGCCTAACTTAGATGATAGGTGACAAACTGAAGTGAGCTATAGGGAGTTGTCCACTTCCAGGCTGCTATCACTACATCTGGAAAAACTGTCTC	030	regLM	14	0.00019688	1.31456	-0.634575	-0.156301	1.31461	-0.599696
gen_709	CAGAATTTTAAGCGGCTCAATTTACTTTCGTGTTATTTTTAATAACAATGACCATAGTAATGCCTTTTCCCCCTTAAAATGTACAGGCTTATTCAAATAAAATGAGAAATGCCAATGGAATATACTCATCTGGGAAATTACATTTTAACGTCATAGCCAAGGAAAAATTGGAGCTGTATTTTGAAGTAACTATTTAAAGG	030	regLM	96	0.548225	0.234168	2.8519	0.33292	0.23423	0.849194
gen_710	GAAAACCAAAAATGTTTCCAGACATGCCCTAAATGTTTCCTGCAGGGGGTGGGGGCAAAGTCACCCCTGGTTGAGAACCACTGTTGTGTAGCCTTTGGTACTATTTGACTTTTTTTTTAACCACGTGCACATTATTTCTATAATTAAACATTTAACTGAGGTCACAAGACCGAAGAGGAAATATGAAGCTGTTATAAGGA	030	regLM	101	0.577804	0.439772	3.46169	0.530255	0.439803	0.545549
gen_711	CCTGAGAAAGGCTTCAACTAAAGAGCTATGGACAGGGACACTCTGTCACTTCCTGGGATTTTGACCCCCAGCTGTCCAACAGAGGAGGGTCTGTGCCTTCGCTCATTAGCCTAACTTAGATGATAGGTGACAAACTGAAGTGAGCTATAGGGAGTTGTCCACTTCCAGGCTGCTATCACTACAGCTCAAATTGTAATCCC	030	regLM	14	0.0276303	0.880821	-0.41968	-0.124481	0.880846	-0.631876
gen_712	CTGTTTGTGCTGTGTGTTTCCAATAATTGACAACATATGTGATTTTGTTATTCTACACTGAGCTTGCTTCGTCTGCATATTCATTAAAAAAGAATTTTTTAAATCTTTGTCAGATGTTCTACATCTGAATCATCTTCTAGTATTAAACCACAGCCAAGAACTTTTATATCTTTTATCACATTAATATAAAGATTTATGGT	030	regLM	94	-0.210521	-0.823754	3.04247	0.504591	-0.823739	1.76669
gen_713	CCCGAATACTGTGCTTTTCCGACGGGCTTAGGAAACGGCACACCAGGATATTATATCCTGCACCTGGCTCGGAGGGTCCTACGTGCACGGAGTCTCGCTGATTGCTAGCACAGAAGTCTGAGATCAAACTGCAAGGCGGCAGCGAGGCTGGGGGAGGGGTGCCCGCCATTGCCCAGGCTTGCTTAGGTAAACAGACAACC	030	regLM	99	0.942631	0.0826694	1.21859	2.04473	0.0827524	-0.0445436
gen_714	CCTGAGAAAGGCTTCAACTAAAGAGCTATGGACAGGGACACTCTGTCACTTCCTGGGATTTTGACCCCCAGCTGTCCAACAGAGGAGGGTCTGTGCCTTCGCTCATTAGCCTAACTTAGATGATAGGTGACAAACTGAAGTGAGCTATGGGGAGAGGTTGCCACAACTTAAATGTTATCCGGTTTTTCCTGGGTAATTCC	030	regLM	26	0.193325	0.254514	-0.0610013	-0.142147	0.254526	-0.354469
gen_715	ATTAGCATGGAATTTGGACTTTGGAGCCATAATCCTGTTGTCTTCTTTCATTTAAAGAATATGGGCCGGGCGCGGTGGCTCACGCCTGTAATCCCAGCACTTTGGGAGGCCAAGGCGGGTAGATCACGAGGTCAGGAGATCGAGACCATCCTGGCTAACACAGTGAAACCCTGTCTCTACTAAAAATACAAAAAATTAGC	030	regLM	57	0.228024	3.15187	2.52442	1.09361	3.15204	2.64537
gen_716	GATTTTTCTACTGCTAGGTTTTCCTTTTGGGGTTACGATTATTACAGGTGGCAATCAGTTAACTTAGTGGTTCTGTAGGCACCGCCCTATCTTCCAACTCACTTACATTTAAAAATTCACACAGAGAGGCTAGTGGGAAGCGGGTAGGTGTAAACAACGTGCTACAGTGAGTCACACCCGTCACAAAAGCCAACAATGAT	030	regLM	101	2.86915	3.88589	0.0518951	2.66279	3.88551	0.648364
gen_717	CTAGCTGTACCAGCCGCTGCCCCGGACCTGCTGCCCTGCCCCACGCACCCCCCCTCCCCTGGCCAGCCTCCCCAGAGGCCAGAAGGCGCCTTATCGGGCAGGGTTAAGGAGGGGGACAGTTATCAGGGGCTGCAGCCTAGATTGGGCCACAATGTCCTCGTCTCTTGAGGGTGGCAGGCTGTGCAGGCTCCCTGATAAAC	030	regLM	8	0.255083	5.16625	0.467991	0.392091	5.16623	0.549042
gen_718	TCTCTGCTCCCCAGAGTCCCTGCACGTGGCTTGACAGTGGCCTTGGTAGGACCCACTGGGGTGTTTCTTCGTCGCCCATGGGCCCTCATGCTGTTATCAGTTGGAAATGAATCAGAGATTAGGAAGCGGGGGGAGTGGTGGGGGTGTTATCGCCCAGTGCACACAGGGTCCCATTCGTTCAGGTCAATGGCCAGTGACGT	030	regLM	20	0.808502	5.15837	-0.632394	0.314918	5.15834	-0.269013
gen_719	CCATCTGTTCCATCCTCACCCACCCAAGGAGCCGCCCCTGCTCCTAGAGACTCTGGGCACCACTGATAAGGGTGGGTACCAGGAACTCCACCCTTTACCGAGAAAGGCAGGCTGGTTTATCGCCACTCAGACCCAGCCAGCAACCACCCTGGGGAGTGTGTCAGCCACCAGGAGCATCGCTGTTGGGGAAAGGTTCATTT	030	regLM	84	0.469655	8.1794	0.761425	0.244399	8.1794	1.61902
gen_720	GATTTTTCTACTGCTAGGTTTTCCTTTTGGGGTTACGATTATTACAGGTGGCAATCAGTTAACTTAGTGGTTCTGTAGGCACCGCCCTATCTTCCAACTCACTTACATTTAAAAATTCACACAGAGAGGCTAGTGGGAAGCGGGTAGGTGTAAACAATGTGCTACAGTGAGAAACCTGGGGTTTTTCTTGGAGCAACAGA	030	regLM	100	0.454772	1.57082	0.172738	0.287657	1.57071	0.293242
gen_721	CCAGTAATGGGATGGCTGGGTCCAATGGTATTTCTAGTTCTAGATCCCTGAGGAATTGCCACACTGACTTCCACAATGGTTGAACTAGTTTACAGTCCCACCAACAGTGTAAAATTATTCCTATTTCTCCACATCCTCTCCAGCACCTGTTGTTTCCTGCCTTTTTAATGATCGCCATTCTAACTGGTGTGAGATGGTAT	030	regLM	4	-0.56482	0.379388	-0.488343	-0.0753502	0.379408	-0.467102
gen_722	AAACAAAAAACAAACAACCCCATCAACAAGTGGGCGAAGGATATGAACAGACACTTCTCAAAAGAAGATATTTATTCAACCAAAAGACACATGAAAAAATGCTCATCATCACTGGCCATCAGAGAAATGCAAATCAAAACCACAATGAGATACCATCTCACACCAGTTAGAATGGCGATCATTAAAAAGTCAGGAAACCA	030	regLM	41	-0.484049	0.632125	0.0207682	-0.18953	0.632144	-0.324169
gen_723	GATTTTTCTACTGCTAGGTTTTCCTTTTGGGGTTACGATTATTACAGGTGGCAATCAGTTAACTTAGTGGTTCTGTAGGCACCGCCCTATCTTCCAACTCACTTACATTTAAAAATTCACACAGAGAGGCTAGTGGGAAGCGGGTAGGTGTAAACAATGTGCTACAGTGAGAATGAATGGAGAGCCTCCTGGGGGTGACA	030	regLM	100	0.4887	1.89202	-0.0203492	0.142948	1.892	0.252562
gen_724	ATTAGCATGGAATTTGGACTTTGGAGCCATAATCCTGTTGTCTTCTTTCATTTAAAGAATATGGGCCGGGCGCGGTGGCTCACGCCTGTAATCCCAGCACTTTGGGAGGCCGAGGCGGGCAGATCACGAGGTCAGGAGATCGAGACCATCCTGGCTAACACGGTGAAAGCCTGTCTCTACTAAAAATACAAAAAATTAGC	030	regLM	56	0.318179	3.31406	2.35906	1.38528	3.31414	2.68363
gen_725	CCCGAATACTGTGCTTTTCCGACGGGCTTAGGAAACGGCACACCAGGATATTATATCCTGCACCTGGCTCGGAGGGTCCTACGTGCACGGAGTCTCGCTCATTGCTAGCACAGAAGTCTGAGATCAAACTGCAAGGCGGCAGCGAGGCTGGGGGAGAGGTGGGGGGGGGGGGGGGGGGGGGGGGGGGGGGGGGGGGGGGG	030	regLM	101	0.431045	1.30469	-0.149299	0.834724	1.30478	-0.149601
gen_726	CCTGAGAAAGGCTTCAACTAAAGAGCTATGGACAGGGACACTCTGTCACTTCCTGGGATTTTGACCCCCAGCTGTCCAACAGAGGAGGGTCTGTGCCTTTGCTCATTAGCCTAACTTAGATGATAGGTGACAAACTGAAGTGAGCTATAGGGAGTTGTCCACTTCCAGGCTGTTATCCATCCAGCTGGGCAATGGGGCTT	030	regLM	11	-0.0626654	0.16494	-0.561013	-0.154669	0.1649	-0.743237
gen_727	GTTTAGCGTAAGAATCAGGGTCCAGCTGGTGCTCCCTAAACAGCAGCTGCTGTTCACTGTTGAAAGGCGCTCTGGAAGGCCAGGTGCGGTGGCTCATGCTTGTAATCCCAGCACTGTGGGAGGCCGAGGTGGGCGGATCACCTGAGGTAAGGAGTTCGAGACCAGCCTGACCAACATGGAGAAACCCCATCTCTCCTAAA	030	regLM	61	0.102223	2.53957	3.30331	0.320191	2.53984	0.987527
gen_728	GTTTAGCGTAAGAATCAGGGTCCAGCTGGTGCTCCCTAAACAGCAGCTGCTGTTCACTGTTGAAAGGCGCTCTGGAAGGCCAGGTGCGGTGGCTCATGCTTGTAATCCCAGCACTGTGGGAGGCCGAGGTGGGAGGATCACTTGAGGCCAGGAGTTCGAGACCAGCCTGGCCAACATGGTGAAACCCCGTCTCTACTAAA	030	regLM	60	-0.0515612	2.01302	2.05147	0.22613	2.0131	1.14075
gen_729	TCTCTGCTCCCCAGAGTCCCTGCACGTGGCTTGACAGTGGCCTTGGTAGGACCCACTGGGGTGTTTCTTCGTCGCCCATGGGCCCTCATGCTGTTATCAGTTGGAAATGAATCAGAGATTAGGAAGCGGGGGGAGTGGTGGGGGTGTTATCGCCCAGTGCACACAGGTTACCACAGACATTTAGCCCTCACTGCAGGGCC	030	regLM	22	0.932608	5.14894	-0.399148	0.544358	5.14887	-0.104958
gen_730	CCTGAGAAAGGCTTCAACTAAAGAGCTATGGACAGGGACACTCTGTCACTTCCTGGGATTTTGACCCCCAGCTGTCCAACAGAGGAGGGTCTGTGCCTTTGCTCATTAGTCCATTTTACAGAGAGCTGATTGGTCTGTTTTACAGAGAGCTGATTGGTCTGTTTTACAGAGAGCTATGTCCAGAGATAAGAGTGCAGGAT	030	regLM	47	4.17361	5.11857	3.75845	4.69018	5.11839	4.78941
gen_731	CCTGAGAAAGGCTTCAACTAAAGAGCTATGGACAGGGACACTCTGTCACTTCCTGGGATTTTGACCCCCAGCTGTCCAACAGAGGAGGGTCTGTGCCTTTGCTCATTAGTCCATTTTACAATTCTTTTTATTTTATTTTATTTTATTTTATTTTATTTTATTTTATTTTATTTTATTTTATTTTATTTTATTTTATTTAA	030	regLM	60	0.15326	0.21792	0.436184	0.216301	0.217901	0.599009
gen_732	ACTGGGATTGCTTGGTTGAATGGTAGTTCCATTTTTAGTTCTTTGAGAAATCTCCAAACTGCTTTCCACAGCAGCTTAACTAATTTACATTCCCACCAGCACTGTCTTAAGTGTTTCCTTTTCTCCGCAGCCTTGCCAACATCTGTAATTTTTTGACTTTTTAATGATATTCTTTATGACTGGTGCAAGATGGTGTCTCA	030	regLM	53	0.19418	0.428567	0.683078	0.368607	0.428548	0.691824
gen_733	CCTGAGAAAGGCTTCAACTAAAGAGCTATGGACAGGGACACTCTGTCACTTCCTGGGATTTTGACCCCCAGCTGTCCAACAGAGGAGGGTCTGTGCCTTCGCTCATTAGCCTAACTTAGATGATAGGTGACAAACTGAAGTGAGCTATGGGGAGAGGTTGCCACAACCTCAGCTTTCCCAAAGTGTGTCGTGGCAACATG	030	regLM	27	0.021174	-0.162099	-0.572161	-0.181698	-0.162064	-0.734259
gen_734	ACTGGGATTGCTTGGTTGAATGGTAGTTCCATTTTTAGTTCTTTGAGAAATCTCCAAACTGCTTTCCACAGCAGCTTAACTAATTTACATTCCCACCAGCACTGTCTTAAGTGTTTCCTTTTCTCCGCAGTCTTGCCAGCATCTGTAATTTTTTGACTTTTTAATGATATTCTTTATGACTGGTGCAAGATGGTGTCTCA	030	regLM	53	0.08508	0.379506	0.763364	0.332325	0.379499	0.904316
gen_735	CTCAGAATTAATGGAGAGGGCCAGTGGCGGCCTGTGCCCTTTGTCCCACTGGCCGGCCTGGGGGTGGCGGCTCCAGAATACAGGGTCCTATTGTGTGCCCTGATGTCAGGCAGCTGGACTGCTGGGAGTGAGGATAAACAAGCAGCTGGAGCATCTCGCCTGAAGCCCCAGGAGAGGGCCAGAGCCCCTGTAGCGTGGGG	030	regLM	99	2.72849	0.0309591	1.30203	2.42143	0.0309748	1.2157
gen_736	CCAGTAATGGGATGGCTGGGTCCAATGGTATTTCTAGTTCTAGATCCCTGAGGAATCGCCACACTGACTTCCACAATGGTTGAACTAGTTTACAGTCCCGCCAACAGTGTAAAATTATTCCTATTTCTCCACATCCTCTCCAGCACCTGTTGTTTCCTGCCTTTTTAATGATCACCATTCTAACTGGTGTGAGATGGTAT	030	regLM	2	-0.574219	0.234315	-0.574342	-0.124289	0.234619	-0.409252
gen_737	TCTCTGCTCCCCAGAGTCCCTGCACGTGGCTTGACAGTGGCCTTGGTAGGACCCACTGGGGTGTTTCTTCGTCGCCCATGGGCCCTCATGCTGTTATCAGTTGGAAATGAATCAGAGATTAGGAAGCGGGGGGAGTGGTGGGGGTGTTATCGCCCAGTGCACACAGGTTACCACAGACTGCAGGTTACCAAATAGTAAAC	030	regLM	24	1.02323	4.70504	-0.977241	0.975906	4.705	-0.500584
gen_738	ATTAGCATGGAATTTGGACTTTGGAGCCATAATCCTGTTGTCTTCTTTCATTTAAAGAATATGGGCCGGGCGCGGTGGCTCACACCTGTAATCCCAGCACTTTGGGAGGCCGAGGCGGGTGGATCATGAGGTCAGGAGATCGAGACCATCCTGGCTAACACAGTGAAACCCTGTCTCTACTAAAAATACAAAAAAATTAG	030	regLM	58	0.0757256	2.72333	0.755233	0.810543	2.72332	0.810063
gen_739	CTCAGAATTAATGGAGAGGGCCAGTGGCGGCCTGTGCCCTTTGTCCCACTGGCCGGCCTGGGGGTGGCGGCTCCAGAATACAGGGTCCTATTGTGTGCCCTGATGTCAGGCAGCTGGACTGCTGGGAGTGAGGATAAACAAGCAGCTGGAGCATCTCGCCTGAAGCCCCAGGAGAGGGCCAGAGAGCTACGTGGCAGCAG	030	regLM	98	2.94673	0.34488	1.7846	2.35163	0.344851	1.49433
gen_740	GTTTAGCGTAAGAATCAGGGTCCAGCTGGTGCTCCCTAAACAGCAGCTGCTGTTCACTGTTGAAAGGCGCTCTGGAAGGCCAGGTGCGGTGGCTCATGCTTGTAATCCCAGCATTTTGGGAGGCCGAGGTGGGCGGATCACCTGAGGTAGGGAGTTCGAGACCAGCCTGACCAACGTGGAGAAACCCCATCTCTCCTAAA	030	regLM	63	-0.0598832	2.75094	3.1617	0.0744535	2.75097	0.778311
gen_741	CCTGAGAAAGGCTTCAACTAAAGAGCTATGGACAGGGACACTCTGTCACTTCCTGGGATTTTGACCCCCAGCTGTCCAACAGAGGAGGGTCTGTGCCTTCGCTCATTAGCCTAACTTAGATGATAGGTGACAAACTGAAGTGAGCTATGGGGAGAGGTACCTCACTTGACTTCAGAGGGAGTGTCAGGAAGTTGCCACAA	030	regLM	28	0.880127	1.63493	-0.269126	0.216633	1.63478	-0.268425
gen_742	CCATCTGTTCCATCCTCACCCACCCAAGGAGCCGCCCCTGCTCCTAGAGACTCTGGGCACCACTGATAAGGGTGGGTACCAGGAACTCCACCCTTTACCGAGAAAGGCAGGCTGGTTTATCGCCACTCAGACCCAGCCAGCGACCACCCTGGGGAGTGTGTCAGCCACCAGGAGCATCGCAGATGCCATTCCTGCCAGGC	030	regLM	88	-0.364073	7.00475	0.478028	-0.163678	7.00471	1.15601
gen_743	CCAGTAATGGGATGGCTGGGTCCAATGGTATTTCTAGTTCTAGATCCCTGAGGAATTGCCACACTGACTTCCACAATGGTTGAACTAGTTTACAGTCCCGCCAACAGTGTATAAGTGTTCCTATTTCTCCACATCCTCTCCAGCACCTGTTGTTTCCTGACTTTTTAATGATCACCATTCTAACTGGTGTGAGATGGTAT	030	regLM	7	-0.54805	0.425335	-0.522283	-0.122957	0.42532	-0.577272
gen_744	CCAGTAATGGGATGGCTGGGTCCAATGGTATTTCTAGTTCTAGATCCCTGAGGAATTGCCACACTGACTTCCACAATGGTTGAACTAGTTTACAGTCCCGCCAACAGTGTAAAATTGTTCCTATTTCTCCACATCCTCTCCAGCACCTGTTGTTTCCTGACTTTTTAATGATCGCTATTCTAACTGGTGTGAGATGGTAT	030	regLM	7	-0.525933	0.411824	-0.47846	-0.126189	0.41192	-0.492354
gen_745	CCATCTGTTCCATCCTCACCCACCCAAGGAGCCGCCCCTGCTCCTAGAGACTCTGGGCACCACTGATAAGGGTGGGTACCAGGAACTCCACCCTTTACCGAGAAAGGCAGGCTGGTTTATCGCCACTCAGACCCAGCCAGCAACCACCCTGGGGAGTGTGTCAGCCACCAGGAGCATCGCTGTTGGGGAATGGGTTGGGG	030	regLM	85	0.299358	8.08149	0.794969	0.184789	8.08143	1.62278
gen_746	GTTTAGCGTAAGAATCAGGGTCCAGCTGGTGCTCCCTAAACAGCAGCTGCTGTTCACTGTTGAAAGGCGCTCTGGAAGGCCAGGTGCGGTGGCTCATGCTTGTAATCCCAGCACTTTGGGAGGCCGAGGTGGGCGGATCACCTGAGGTAAGGAGTTCGAGACCAGCCTGACCAACGTGGAGAAACCCCATCTCTCCTATA	030	regLM	61	-0.0133863	2.8815	3.32397	0.14685	2.88151	1.26941
gen_747	CTCAGAATTAATGGAGAGGGCCAGTGGCGGCCTGTGCCCTTTGTCCCACCGGCCGGCCTGGGGGTGGCGGCTCCAGAATACAGGGTCCTATTGTGTGCCCTGATGTCAGGCAGCTGGACTGCTGGGAGTGAGGATAAACAAGCAGCTGGAGCATCTCGCCTGAAGCCCCAGGAGAGGGGCCACCAGCAGGTGCCCGGGCT	030	regLM	98	2.45108	-0.318796	0.360135	1.73808	-0.318824	0.506785
gen_748	CTCTCTATTACATTCCATTCTCCATTCCATTCCATTCTCCATTCCATTCCACTCCATTCTCCATTCCATTCCACTCCATTCTCCATTCTCCATTATATTTTCCATTCCATTCTCCATTACATTCCATTCTCCATTACATTCCATTCTCCATTACATTCCATTCTCCATTACATTCCATTCTCCATTCCATTCCCCTTTCC	030	regLM	87	-0.521168	-0.108609	4.34248	-0.149549	-0.108563	0.531952
gen_749	TCTCTGCTCCCCAGAGTCCCTGCACGTGGCTTGACAGTGGCCTTGGTAGGACCCACTGGGGTGTTTCTTCGTCGCCCATGGGCCCTCATGCTGTTATCAGTTGGAAATGAATCAGAGATTAGGAAGCGGGGGGAGTGGTGGGGGTGTTATCGCCCAGTGCACACAGGTTACCACAGAGGTCACACGGTAGGTGAGTGGGT	030	regLM	22	0.895158	4.51739	-1.03663	0.907984	4.51754	-0.577884
gen_750	CTAGCTGTACCAGCCGCTGCCCCGGACCTGCTGCCCTGCCCCACCCCCCCCTCCCCTGGCCAGCCTCCCCAGAGGCCAGAAGGCGCCTTATCGGGCAGGGTTAAGGAGGGGGACAGTTATCAGGGGCTGCAGCCTAGCAGGTCGCAGGCAGGGTCGGGGCTGGGGAGTGGGCAGGGGCAAGGCCTCTGGGGTGGGGGTCT	030	regLM	34	0.883733	3.5552	0.55277	1.52715	3.55521	0.619216
gen_751	CCTGAGAAAGGCTTCAACTAAAGAGCTATGGACAGGGACACTCTGTCACTTCCTGGGATTTTGACCCCCAGCTGTCCAACAGAGGAGGGTCTGTGCCTTTGCTCATTAGCCTAACTTAGATGATAGGTGACAAACTGAAATAAAGAACTCTGACTTTATTAGGTAATCCATAAAGTAGGTATACACTGATGCATATTTCT	030	regLM	36	-0.244734	-0.109273	-0.403191	-0.388258	-0.109271	-0.76618
gen_752	CCAGTAATGGGATGGCTGGGTCCAATGGTATTTCTAGTTCTAGATCCCTGAGGAATTGCCACACTGACTTCCACAATGGTTGAACTAGTTTACAGTCCCACCAACAGTGTGAAAATGTTCCTATTTCTCCACATCCTCTCCAGCACCTGTTGTTTCCTGACTTTTTAATGATTGCCATTCTAACTGGTGTGAGATGGTAT	030	regLM	9	-0.5605	-0.0123043	-0.543399	-0.191719	-0.0123117	-0.583871
gen_753	ATTAGCATGGAATTTGGACTTTGGAGCCATAATCCTGTTGTCTTCTTTCATTTAAAGAATATGGGCCAGGCGCGGTGGCTCACGCCTGTAATCCCAGCACTTTGGGAGGCCGAGGCGGGTGGATCACGAGGTCAGGAGATCGAGACCATCCTGGCTAACACGGTGAAAGCCTGTCTCTACTAAAAATACAAAAAAATAGG	030	regLM	58	0.372001	3.35256	1.31837	1.28809	3.35252	2.51885
gen_754	TCTCTGCTCCCCAGAGTCCCTGCACGTGGCTTGACAGTGGCCTTGGTAGGACCCACTGGGGTGTTTCTTCGTCGCCCATGGGCCCTCATGCTGTTATCAGTTGGAAATGAATCAGAGATTAGGAAGCGGGGGGAGTGGTGGGGGTGTTATCGCCCAGTGCACACGGGGCTCTCAGCTAATCTCTGGCGGCCCTGGGCCAG	030	regLM	4	0.816243	5.8505	-0.165462	0.979391	5.85049	0.143876
gen_755	TCTCTGCTCCCCAGAGTCCCTGCACGTGGCTTGACAGTGGCCTTGGTAGGACCCACTGGGGTGTTTCTTCGTCGCCCATGGGCCCTCATGCTGTTATCAATTGGAAATGAATCAGAGATTAGGAAGCGGGGGGAGTGGTGGGGGTGTTATCGCCCAGTGCACACAGGTTACCACAGACATTTATCACTCACCGGGGACGC	030	regLM	20	0.0615651	5.29513	-0.434121	0.0494136	5.2952	-0.325821
gen_756	CCTGAGAAAGGCTTCAACTAAAGAGCTATGGACAGGGACACTCTGTCACTTCCTGGGATTTTGACCCCCAGCTGTCCAACAGAGGAGGGTCTGTGCCTTCGCTCATTAGCCTAACTTAGATGATAGGTGACAAACTGAAATGAGCTATAGGGAGTTGTCCACTTCCAGGCTGCTATCAGTGTGACAGAGGTTGGATTCCA	030	regLM	11	0.0107767	1.25305	-0.687312	-0.177862	1.25317	-0.747448
gen_757	CCTGAGAAAGGCTTCAACTAAAGAGCTATGGACAGGGACACTCTGTCACTTCCTGGGATTTTGACCCCCAGCTGTCCAACAGAGGAGGGTCTGTGCCTTTGCTCATTAGCCTAACTTAGATGATAGGTGACAAACTGAAGTGAGCTATGGGGAGAGGTACCTCATTTATCTGTTGCCGGGGCAGTGGCTCACGCCTGTAA	030	regLM	27	-0.0634467	0.345573	-0.350784	-0.201116	0.345538	-0.720306
gen_758	CCTGAGAAAGGCTTCAACTAAAGAGCTATGGACAGGGACACTCTGTCACTTCCTGGGATTTTGACCCCCAGCTGTCCAACAGAGGAGGGTCTGTGCCTTTGCTCATTAGTCCATTTTACAGAGAGCTGATTGGTCTGTTTTACAGAGAGCTGATTGGTCTGTTCAAATGCAATATGGTAAATATAGGACCAAAGACATAT	030	regLM	49	3.55104	3.84025	4.47611	4.3929	3.84033	5.3305
gen_759	GTTTAGCGTAAGAATCAGGGTCCAGCTGGTGCTCCCTAAACAGCAGCTGCTGTTCACTGTTGAAAGGCGCTCTGGAAGGCCAGGTGCGGTGGCTCATGCTTGTAATCCCAGCACTGTAGGAGGCGGGGTGGGGCGGATCACCTGAGGTAAGGAGTTCGAGACCAGCCTGACCAACGTGGAGAAACCCCATCTCTCCTAAA	030	regLM	66	-0.0785725	1.57261	1.2325	0.0587789	1.57261	-0.397309
gen_760	ACTGGGATTGCTTGGTTGAATGGTAGTTCCATTTTTAGTTCTTTGAGAAATCTCCAAACTGCTTTCCACAGCAGCTTAACTAATTTACATTCCCACCAGCACTGTCTTAAGTGTTTCCTTTTCTCCGCAGCCTTGCCAACATCTGTAATTTTTTGACTTTTTAATGATATTCTTTATGACTGGTGCAAGATGATATCTCA	030	regLM	53	0.0218103	0.97535	0.610459	0.267034	0.975229	0.273914
gen_761	GTTTAGCGTAAGAATCAGGGTCCAGCTGGTGCTCCCTAAACAGCAGCTGCTGTTCACTGTTGAAAGGCGCTCTGGAAGGCCAGGTGCGGTGGCTCATGTCTGTAATCCCAGCACTGTGGGAGGCCGAGGTGGGCGGATCACCTGAGGTAGGGAGTTCGAGACCAGCCTGACCAACGTGGAGAAACCCCATCTCTCCTAAA	030	regLM	63	0.103299	2.53085	3.18876	0.267974	2.5308	0.668396
gen_762	CTCTCTATTACATTCCATTCTCCATTCCATTCCCATACATTCTCCACTCCACTGCATTCTCTATTCCATTCTCCATTCCATTCCACTCCATTCTCCATTCCATTCCATTCTCCATTCCATTCCATTCTCCATTACATTCCATTCTCCATTACATTCCATTCTCCCGTCCATTTTTCACTCCATTCCATTCCATTCTCCAT	030	regLM	86	-0.746466	-0.22206	3.38305	-0.278034	-0.222022	-0.678338
gen_763	TCTCTGCTCCCCAGAGTCCCTGCACGTGGCTTGACAGTGGCCTTGGTAGGACCCACTGGGGTGTTTCTTCGTCGCCCATGGGCCCTCATGCTGTTATCAGTTGGAAATGAATCAGAGATTAGGAAGCGGGGGGAGTGGTGGGGGTGTTATCGCCCAGTGCACACAGGTTACCACAGACATTTATCACTGGCCAAAAGGCA	030	regLM	21	0.684809	5.6613	-0.549326	0.46243	5.66129	-0.224164
gen_764	CTCTCTATTACATTCCATTCTCCATTCCATTCCATTCTCCATTCCATTCCACTCCATTCTCCATTCCATTCCACTCCATTCTCCATTCCATTCCATTCTCCATTATATTCTCCATTCCATTCCATTCTCCATTACATTCCATTCTCCATTACATTCCATTCTCCATTACATTCCATTCTCCATTCCATTCCCCTTTCCAT	030	regLM	87	-0.634707	-0.233532	3.778	-0.297123	-0.233511	-0.303862
gen_765	TCTCTGCTCCCCAGAGTCCCTGCACGTGGCTTGACAGTGGCCTTGGTAGGACCCACTGGGGTGTTTCTTCGTCGCCCATGGGCCCTCATGCTGTTATCAGTTGGAAATGAATCAGAGATTAGGAAGCGGGGGGAGTGGTGGGGGTGTTATCGCCCAGTGCACACAGGTTACCACAGAGGTCAAAAGACAGGCCCCTGCAG	030	regLM	23	1.02685	5.25639	-0.391039	0.908924	5.25637	-0.275384
gen_766	CCTGAGAAAGGCTTCAACTAAAGAGCTATGGACAGGGACACTCTGTCACTTCCTGGGATTTTGACCCCCAGCTGTCCAACAGAGGAGGGTCTGTGCCTTTGCTCATTAGCCTAACTTAGATGATAGGTGACAAACTGAAGTGAGCTATGGGGAGAGGTACCTCATTTATCTGTTGCTGGGTGTGGCAGGGCCTCTGGGAA	030	regLM	25	0.187886	2.27793	-0.725321	-0.166809	2.27784	-0.718963
gen_767	CATTCCATTCCATTCCATTCTGCATTCTGTTCCATTCTCCATTCCATTCCATTCTCCATACCATCCTCCATTCCATTACACTGCATTCCATTCTCCATTATATTTTATTCACCACGGCATTCCATTACATTTTCCATTCCATTCTATTCTCCATTCCATTCCATATTCTATTCCCCTTTCCATTCCATTCTCCATTCCAT	030	regLM	89	-0.884075	-0.436739	3.4999	-0.366518	-0.436778	-0.877721
gen_768	GTTTAGCGTAAGAATCAGGGTCCAGCTGGTGCTCCCTAAACAGCAGCTGCTGTTCACTGTTGAAAGGCGCTCTGGAAGGCCAGGTGCGGTGGCTCATACTTGTAATCCCAGCACTGTGGGAGGCCGAGGTGGGCGGATCACCTGAGGTAAGGAGTTCGAGACCAGCCTGACCAACGTGGAGAAACCCCATCTCTACTAAA	030	regLM	63	0.110201	2.33705	3.16972	0.334558	2.33699	0.730983
gen_769	AACCAGAAAAAAACAAACAACCCCATCAACAAGTGGGCGAAGGATATGAACAGACACTTCTCAAAAGAAGATATTTATGCAGCCAACAAACATATGAAAAAATGCTCATCATCACTGGCCATCAGAGAAATGCAAATCAAAACCACAATGAGATACCATCTCACACCAGTTAGAATGGCGATCATTGAAAAGTCAGGAAG	030	regLM	34	-0.429686	0.658134	-0.0610325	-0.157167	0.65826	-0.365715
gen_770	TCTCTGCTCCCCAGAGTCCCTGCACGTGGCTTGACAGTGGCCTTGGTAGGACCCACTGGGGTGTTTCTTCGTCGCCCATGGGCCCTCATGCTGTTATCAGTTGGAAATGAATCAGAGATTAGGAAGCGGGGGGAGTGGTGGGGGTGTTATCGCCCAGTGCACACAGGTTACCACAGACATTTAGCCCTTTATCAGAGGCC	030	regLM	25	0.69791	5.5245	-0.697841	0.568468	5.52458	-0.331447
gen_771	TCTCTGCTCCCCGGAGTCCCTGCACGTGGCTTGACAGTGGCCTTGGTAGGACCCACTGGGGTGTTTCTTCGTCGCCCATGGGCCCTCATGCTGTTATCAGTTGGAAATGAATCAGAGATTAGGAAGCGGGGGGAGTGGTGGGGGTGTTATCGCCCAGTGCACACGGGGCTCTCAGCTAATCTCTGGCGGCCCTGGGTCCT	030	regLM	3	0.687415	5.70306	-0.275956	0.854026	5.70304	0.0700033
gen_772	GTTTAGCGTAAGAATCAGGGTCCAGCTGGTGCTCCCTAAACAGCAGCTGCTGTTCACTGTTGAAAGGCGCTCTGGAAGGCCAGGTGCGGTGGCTCATGCTTGTAATCCCAGCACTGTGGGAGGCCGAGGTGGGCGGATCACCTGAGGTAGGGAGTTCGAGACCAGCCTGACCAACGTGGAGAAACCCCATCTCTCCTAAT	030	regLM	63	0.11536	2.5132	3.21444	0.274363	2.51322	0.641619
gen_773	AGAATTGGAAGGAGCTTAGGGGAAAGCTAGCCTCAGGTCAGAATTGCCTGCATGCCACTCGGCTAGTGAGCTGCTGAATCACCTTATTCCTGGAGAAAGATTTTGTTTTTTATTTTATTTTATTTTATTTTATTTTATTTTATTTTACTTTATTATTATTATTATTATTATTATTATTATTATTATTATTATTATTATTA	030	regLM	93	0.0749904	0.329906	0.33994	0.0758367	0.329906	0.489436
gen_774	CTGTTTGTGCTGTGTGTTTCCAATAATTGACAACATATGTGATTTTGTTATTCTACACTGAGCTTGCTTCGTCTGCATATTCATTAAAAAAGAATTTTTAAAATCTTTGTCAGATGTTCTACATCTGAATCATCTTCTAGTATTAAACCACAGCCAAGAACTTTTATATCTTTTATCACATTAATATAAAGATGATAAAA	030	regLM	96	-0.350358	-0.795682	3.17495	0.311202	-0.795645	1.43872
gen_775	ATTATGATACAGTCCAAGTATGTAACTTTCTGGGGACCAGACTTTGCTGAGAGTCATAATGGAGAGTCAAAGAGTCTGATGGCTGAGAGGGATGTGCCTAGGCTTGCCTTCATAAATGTTCATTGTCTCAGCCAAGGTTTTGGCAGGAGCGAGAGCAGGCTCAGATCAGTGTCACAGGCACGAAGCCCAGCATGGCTGAT	030	regLM	96	1.36373	-0.128983	4.79887	1.18374	-0.128919	2.20414
gen_776	CCTGAGAAAGGCTTCAACTAAAGAGCTATGGACAGGGACACTCTGTCACTTCCTGGGATTTTGACCCCCAGCTGTCCAACAGAGGAGGGTCTGTGCCTTCGCTCATTAGCCTAACTTAGATGATAGGTGACAAACTGAAGTGAGCTATGGGGAGAGGTACCTCATTTATCTGTTGCTGGGTGTTGCATTCCAGCCTGGGC	030	regLM	26	0.044241	0.570735	-0.471961	-0.145512	0.570696	-0.66195
gen_777	ATTAGCATGGAATTTGGACTTTGGAGCCATAATCCTGTTGTCTTCTTTCATTTAAAGAATATGGGCCGGGCGCGGTGGCTCACGCCTGTAATCCCAGCACTTTGGGAGGCCAAGGCGGGTGGATCACGAGGTCAGGAGATCGAGACCATCCTGGCTAACACGGTGAAAGCCTGTCTCTACTAAAAATACAAAAAAATAGG	030	regLM	58	0.336731	3.30532	1.6207	1.28519	3.30537	2.78939
gen_778	GTTTAGCGTAAGAATCAGGGTCCAGCTGGTGCTCCCTAAACAGCAGCTGCTGTTCACTGTTGAAAGGCGCTCTGGAAGGCCAGGTGCGGTGGCTCATGCTTGTAATCCCAGCACTGTGGGAGGCCGAGGTGGGCGGATCACCTGAGGTAAGGAGTTCGAGACCAGCCTGACCAACGTGGAGAAACCCCATCTCTCCTAAC	030	regLM	62	0.137945	2.48345	3.08771	0.282377	2.4834	0.805799
gen_779	ATATTGGTACAGCACATTTGTCGCTATTAATAAACCAGTATCCAGGGCCAGGTGCAGTGGCTCACGCCTGTAATCCCAGCACTTTGGGAGGCCGAGGCAGGTGGATCACCTGAGGTCAGGAGTTCGAGACCAGCCTGACCAACATGGGAAAACCCTGTCTCTACTAAAAATACAAAATTAGCTGGGCTTGGTGGTGCCTG	030	regLM	48	-0.289853	3.19654	3.38643	-0.0239659	3.19651	0.764406
gen_780	GATTTTTCTACTGCTAGGTTTTCCTTTTGGGGTTACGATTATTACAGGTGGCAATCAGTTAACTTAGTGGTTCTGTAGGCACCGCCCTATCTTCCAACTCACTTACATTTAAAAATTCACACAGAGAGGCTAGTGGGAAGCGGGTAGGTGTAAACAATGTGCTACAGTGAGACTGGCCGGTGTATCTACTTTACAGAGGA	030	regLM	99	0.668132	1.96106	0.209248	0.429209	1.96117	0.37493
gen_781	GATTTTTCTACTGCTAGGTTTTCCTTTTGGGGTTACGATTATTACAGGTGGCAATCAGTTAACTTAGTGGTTCTGTAGGCACCGCCCTATCTTCCAACTCACTTACATTTAAAAATTCACACAGAGAGGCTAGTGGGAAGCGGGTAGGTGTAAACAATGTGCTACAGTGAGTCACACCCGTCACAAAAGCCAACAATGGT	030	regLM	100	2.72107	3.18399	0.182779	2.02419	3.18394	0.998893
gen_782	GATTTTTCTACTGCTAGGTTTTCCTTTTGGGGTTACGATTATTACAGGTGGCAATCAGTTAACTTAGTGGTTCTGTAGGCACCGCCCTATCTTCCAACTCACTTACATTTAAAAATTCACACAGAGAGGCTAGTGGGAAGCGGGTAGGTGTAAACAATGTGCTACAGTGAGAAACCTGGGGTTTTTCTTGGAGCAATATT	030	regLM	101	0.427799	1.39734	0.109271	0.25617	1.39735	0.220457
gen_783	CCTGAGAAAGGCTTCAACTAAAGAGCTATGGACAGGGACACTCTGTCACTTCCTGGGATTTTGACCCCCAGCTGTCCAACAGAGGAGGGTCTGTGCCTTCGCTCATTAGCCTAACTTAGATGATAGGTGACAAACTGAAATGAGCTATAGGGAGTTGTCCACTTCCAGGCTGCTATCACTGTCTCAGATGGGGCGTTGGT	030	regLM	10	-0.00931107	1.56026	-0.426044	-0.14983	1.56025	-0.624585
gen_784	TCATTTGAAGATGGAGGCAGAGATTGGAGTGATACAACTATAAGTCAGGGAATGCCAAGGACTTGAGGTCATGTGTTACAGAAGCCCTAGGAAATGAGTCAATTTCCTGGCACAGCACTAAGACATGCTGGTATTCTTCATTCCATCCCTTTCCCCTATTCCTAAATGTGCTCCAGGGACAATGGGGAAACAGGCCACAG	030	regLM	94	0.734643	-0.0445239	5.68726	3.47518	-0.0444867	6.34788
gen_785	CCATCTGTTCCATCCTCACCCACCCAAGGAGCCGCCCCTGCTCCTAGAGACTCTGGGCACCACTGATAAGGGTGGGTACCAGGAACTCCACCCTTTACCGAGAAAGGCAGGCTGGTTTATCGCCACTCAGACCCAGCCAGCGACCACCCTGGGGAGTGTGTCAGCCACCAGGAGCATCGCTGTTGGGGAAATGTTATCTT	030	regLM	84	-0.0191881	7.41997	0.406945	0.0379157	7.41995	1.20413
gen_786	CATGTTGCCTATGGTATTATAAGAATTGAAAGAAGGCCAGGCGCAGTGGCTCACACCTGTAATCCCAGCACTTTGGGAGGCTGAGGCGGGCAGATCACTTGAGGTCAGGAGTTCGAGACCAGCCTGGCCAACATGGTGAAACCCTGTCTCTACTAAAAATACAAAAATTAGCCAGGCATGGTGGTGCACACCTGTAATCC	030	regLM	44	-0.210234	3.60351	3.44833	0.0197349	3.60353	1.50876
gen_787	GTTTAGCGTAAGAATCAGGGTCCAGCTGGTGCTCCCTAAACAGCAGCTGCTGTTCACTGTTGAAAGGCGCTCTGGAAGGCCAGGTGCGGTGGCTCATGCTTGTAATCCCAGCACTGTGGGAGGCCGAGGTGGGCGGATCACCTGAGGTAAGGAGTTCGAGACCAGCATGGCCAACATGGAGAAACCCCATCTCTCCTAAA	030	regLM	61	0.0859448	2.27943	2.94068	0.214999	2.27937	0.527946
gen_788	TCTCTGCTCCCCAGAGTCCCTGCACGTGGCTTGACAGTGGCCTTGGTAGGACCCACTGGGGTGTTTCTTCGTCGCCCATGGGCCCTCATGCTGTTATCAGTTGGAAATGAATCAGAGATTAGGAAGCGGGGGGAGTGGTGGGGGTGTTATCGCCCAGTGCACACAGGTTACCACAGACATTTAGCCCTCACAGGAACCCG	030	regLM	22	0.909375	5.19493	-0.457752	0.565395	5.19496	-0.154426
gen_789	CCAGTAATGGGATGGCTGGGTCCAATGGTATTTCTAGTTCTAGATCCCTGAGGAATTGCCACACTGACTTCCACAATGGTTGAACTAGTTTACAGTCCCGCCAACAGTGTAAAATTATTCCTATTTCTCCACATCCTCTCCAGCATCTGTTGTTTCCTGCCTTTTTAATGATCACCATTCTAACTGGTGTGAGATGGTAT	030	regLM	4	-0.556066	0.402548	-0.407099	-0.0167782	0.40284	-0.315687
gen_790	GTTTAGCGTAAGAATCAGGGTCCAGCTGGTGCTCCCTAAACAGCAGCTGCTGTTCACTGTTGAAAGGCGCTCTGGAAGGCCAGGCGCGGTGGCTCATGCTTGTAATCCCAGCACTGTGGGAGGCCGAGGTGGGCGGATCACCTGAGGTAAGGAGTTCGAGACCAGCCTGACCAACGTGGAGAAACCCCGTCTCTCCTAAA	030	regLM	63	0.432994	3.02501	3.87587	0.735024	3.02471	1.79575
gen_791	GATTTTTCTACTGCTAGGTTTTCCTTTTGGGGTTACGATTATTACAGGTGGCAATCAGTTAACTTAGTGGTTCTGTAGGCACCGCCCTATCTTCCAACTCACTTACATTTAAAAATTCACACAGAGAGGCTAGTGGGAAGCGGGTAGGTGTAAACAATGTGCTACAGTGAGAATCCAGGGGCCTCTCTGGGGGGAAAACT	030	regLM	102	0.788531	1.50909	0.102167	0.493831	1.50913	0.4278
gen_792	CTAGCTGTACCAGCCGCTGCCCCGGACCTGCTGCCCTGCCCCACCCCCCCCTCCCCTGGCCAGCCTCCCCAGAGGCCAGAAGGCGCCTTATCGGGCAGGGTTAAGGAGGGGGACAGTTATCAGGGGCTGCAGCCTAGATTGGGCCACAATGTCCTCGTCTCTTGAGGGTGGCAGGCTGTGCAGGCTCCCTGACCAAGGGC	030	regLM	7	0.578763	4.76157	0.85513	0.284304	4.76157	0.816516
gen_793	GAAAGGATACTCTGGCTGTCATGTGGACTGGAGGGAGCTGGAATTGAGGCAGTGAGCCCAGCTACCAGAGTCTTGAAATAGTTTAGTGTAAGATGCTGAGTCATGAATTGGGGCAGAGAGGATAACAAAGTAGGGAAGTGGGGGTAGAGACAGTCGTAAGACCTGAGGAGGAAATGGCTAAGTGAGGGTTGAAGGAGGAA	030	regLM	94	1.5582	5.41694	3.25593	1.52346	5.41703	4.08719
gen_794	ACTGGGATTGCTTGGTTGAATGGTAGTTCCATTTTTAGTTCTTTGAGAAATCTCCAAACTGCTTTCCACAGCAGCTTAACTAATTTACATTCCCACCAGCACTGTCTTAAGTGTTTCCTTTTCTCCGCAGTCTTGCCAGCATCTGTAATTTTTTGACTTTTTAATGATATTCTTTATGACTGGTGCAGGATGGTATCTCA	030	regLM	53	0.0361526	0.492484	0.689143	0.223413	0.492602	0.691882
gen_795	ATTAGCATGGAATTTGGACTTTGGAGCCATAATCCTGTTGTCTTCTTTCATTTAAAGAATATGGGCCGGGCGCGGTGGCTCACGCCTGTAATCCCAGCACTTTGGGAGGCCGAGGCGGGTGGATCATGAGGTCAGGAGATCGAGACCATCCTGGCTAACACAGTGAAACCCTGTCTCTACTAAAAATACAAAAAATTAGC	030	regLM	57	0.251789	3.30574	1.86036	1.06924	3.30574	1.77585
gen_796	CCTGAGAAAGGCTTCAACTAAAGAGCTATGGACAGGGACACTCTGTCACTTCCTGGGATTTTGACCCCCAGCTGTCCAACAGAGGAGGGTCTGTGCCTTCGCTCATTAGCCTAACTTAGATGATAGGTGACAAACTGAAATGAGCTATAGGGAGTTGTCCACTTCCAGGCTGCTATCAGTACACCAGCTGGCCTGCTCCT	030	regLM	8	0.113051	3.73016	-0.412018	-0.161446	3.73014	-0.637519
gen_797	CCAGTAATGGGATGGCTGGGTCCAATGGTATTTCTAGTTCTAGATCCCTGAGGAATTGCCACACTGACTTCCACAATGGTTGAACTAGTTTACAGTCCCGCCAACAGTGTAAAATTATTCCTATTTCTCCACATCCTCTCCAGCACCTGTTGTTTCCTGCCTTTTTTGTTTGTTTTTTTTTGAGACGGAGTCTCGCTCTG	030	regLM	25	-0.0579375	0.880317	-0.323386	0.4271	0.880067	-0.0416173
gen_798	CCTGAGAAAGGCTTCAACTAAAGAGCTATGGACAGGGACACTCTGTCACTTCCTGGGATTTTGACCCCCAGCTGTCCAACAGAGGAGGGTCTGTGCCTTCGCTCATTAGCCTAACTTAGATGATAGGTGACAAACTGAAGTGAGCTATAGGGAGTTGTCCACTTCCAGGCTGCTATCACTACAGCCCATCTGGAAGTGTG	030	regLM	10	-0.0261401	4.37164	-0.697588	-0.176952	4.3718	-0.69963
gen_799	ATTAGCATGGAATTTGGACTTTGGAGCCATAATCCTGTTGTCTTCTTTCATTTAAAGAATATGGGCCGGGCGCGGTGGCTCACGCCTGTAATCCCAGCACTTTGGGAGGCCGAGGCGGGTGGATCACAAGGTCAGGAGATCGAGACCATCCTGGCTAACACAGTGAAACCCTGTCTCTACTAAAAATACAAAAAAATTAG	030	regLM	58	0.285238	3.43322	2.55039	1.11381	3.43324	2.24098
gen_800	CATTCCATTCCATTCCATTCTGCATTCTGTTCCATTCTCCATTCCATTCCATTCTCCATACCATCCTCCATTCCATTACACTGCATTCCATTCTCCATTATATTTTATTCACCACGGCATTCCATTACATTTTCCATTCCATTCTATTCTCCATTCCATTCCATTCTCCATTCCATTCCATTCTCCATTCCATTCCATTC	030	regLM	91	-0.739515	-0.36138	3.45895	-0.37409	-0.361352	-0.693129
gen_801	AGAAAAAAACAAACAACCCCATCAACAAGTGGGCGAAGGATATGAACAGACACTTCTCAAAAGAAGATATTTATTCAACCAAAAGACACATGAAAAAATGCTCATCATCACTGGCCATCAGAGAAATGCAAATCAAAACCACAATGAGATACCATCTCACGCCAGTTAGAATGGCGATCATTGAAAAGTCAGGAAGCAAC	030	regLM	46	-0.413074	1.32094	0.214613	-0.116519	1.32093	-0.313887
gen_802	TCTCTGCTCCCCAGAGTCCCTGCACGTGGCTTGACAGTGGCCTTGGTAGGACCCACTGGGGTGTTTCTTCGTCGCCCATGGGCCCTCATGCTGTTATCAGTTGGAAATGAATCAGAGATTAGGAAGCGGGGGGAGTGGTGGGGGTGTTATCGCCCAGTGCACACAGGTTACCACAGACAGGGTCTGGGATCTAGGAGGCA	030	regLM	21	0.627368	4.78988	-0.788819	0.14969	4.78987	-0.36716
gen_803	CCAGTAATGGGATGGCTGGGTCCAATGGTATTTCTAGTTCTAGATCCCTGAGGAATCGCCACACTGACTTCCACAATGGTTGAACTAGTTTACAGTCCCACCAACAGTGTAAAAGTGTTCCTATTTCTCCACATCCTCTCCAGCACCTGTTGTTTCCTGACTTTTTAATGATCGCCATTCTAACTGGTGTGAGATGGTAT	030	regLM	6	-0.347848	0.00618484	-0.33261	-0.112476	0.00617941	-0.39801
gen_804	AGAATTGGAAGGAGCTTAGGGGAAAGCTAGCCTCAGGTCAGAATTGCCTGCATGCCACTCGGCTAGTGAGCTGCTGAATCACCTTATTCCTGGAGAAAGCCTTTGATACTGAGAAAACTGACTTGCTCAGCTCTTGCTACAACTGTGACCATCTCTGCAACAGTTTTCTTTGTCAAGAAGAAACTTTCAGACTTCGTAAT	030	regLM	94	0.0716017	1.54007	0.645811	-0.0165003	1.54007	0.660158
gen_805	GATTTTTCTACTGCTAGGTTTTCCTTTTGGGGTTACGATTATTACAGGTGGCAATCAGTTAACTTAGTGGTTCTGTAGGCACCGCCCTATCTTCCAACTCACTTACATTTAAAAATTCACACAGAGAGGCTAGTGGGAAGCGGGTAGGTGTAAACAATGTGCTACAGTGAGAATCCAGGAACATAAGGCCGTGGGGAGGC	030	regLM	100	0.671633	1.44071	0.19714	0.501648	1.44074	0.312567
gen_806	GATTTTTCTACTGCTAGGTTTTCCTTTTGGGGTTACGATTATTACAGGTGGCAATCAGTTAACTTAGTGGTTCTGTAGGCACCGCCCTATCTTCCAACTCACTTACATTTAAAAATTCACACAGAGAGGCTAGTGGGAAGCGGGTAGGTGTAAACAATGTGCTACAGTGAGAAATAGTAACTCCAATTCATCAATTGCAT	030	regLM	99	0.320689	1.09168	0.034591	0.0770437	1.09161	-0.00653173
gen_807	CCATCTGTTCCATCCTCACCCACCCAAGGAGCCGCCCCTGCTCCTAGAGACTCTGGGCACCACTGATAAGGGTGGGTACCAGGAACTCCACCCTTTACCAAGAAAGGCAGGCTGGTTTATCGCCACTCAGACCCAGCCAGCGACCACCCTGGGGAGTGTGTCAGCCACCAGGAGCATCGCTGTTGGGGAATGGGTTGGTG	030	regLM	84	-0.186701	6.52523	0.338262	-0.115523	6.52522	1.09295
gen_808	GATTTTTCTACTGCTAGGTTTTCCTTTTGGGGTTACGATTATTACAGGTGGCAATCAGTTAACTTAGTGGTTCTGTAGGCACCGCCCTATCTTCCAACTCACTTACATTTAAAAATTCACACAGAGAGGCTAGTGGGAAGCGGGTAGGTGTAAACAATGTGCTACAGTGAGAAAACTGAAGTTCAGAGAGCCTCCCGGTA	030	regLM	101	0.739353	1.91556	0.303141	0.280226	1.91556	0.385489
gen_809	AGAATTGGAAGGAGCTTAGGGGAAAGCTAGCCTCAGGTCAGAATTGCCTGCATGCCACTCGGCTAGTGAGCTGCTGAATCACCTTATTCCTGGAGAAAGATTTTGTTTTTTATTTTATTTTATTTTATTTTATTTTATTTTATTTTATTTTATTTTATTTTATTTTATTTTATTTAACATAAGACTTTGAGATGGAATCT	030	regLM	98	0.209206	0.286868	0.568101	0.230538	0.286882	0.897762
gen_810	CTCAGAATTAATGGAGAGGGCCAGTGGCGGCCTGTGCCCTTTGTCCCACCGGCCGGCCTGGGGGTGGCGGCTCCAGAATACAGGGTCCTATTGTGTGCCCTGATGTCAGGCAGCTGGACTGCTGGGAGTGAGGATAAACAAGCAGCTGGAGCAGCTGGAGCATCTCGCCTGAAGCCCCAGGAGAGGGCCAGAGCCCCTGC	030	regLM	98	2.99342	0.194285	1.4886	2.1717	0.194226	1.09155
gen_811	ATTAGCATGGAATTTGGACTTTGGAGCCATAATCCTGTTGTCTTCTTTCATTTAAAGAATATGGGCCGGGCGCAGTGGCTCACGCCTGTAATCCCAGCACTTTGGGAGGCCGAGGCAGGTGGATCACGAGGTCAGGAGATCGAGACCATCCTGGCTAACACAGTGAAACCCTGTCTCTACTAAAAATACAAAAAATTAGC	030	regLM	59	0.160489	2.9131	1.4305	0.992432	2.91308	2.39686
gen_812	GTTTAGCGTAAGAATCAGGGTCCAGCTGGTGCTCCCTAAACAGCAGCTGCTGTTCACTGTTGAAAGGCGCTCTGGAAGGCCAGGCGCGGTGGCTCATGCTTGTAATCCCAGCACTGTGGGAGGCCGAGGTGGGCGGATCACCTGAGGTAAGGAGTTCGAGACCAGCCTGACCAACGTGGAGAAATCCCATCTCTCCTAAA	030	regLM	63	0.268117	2.61522	3.63061	0.526226	2.6152	1.73679
gen_813	CCTGAGAAAGGCTTCAACTAAAGAGCTATGGACAGGGACACTCTGTCACTTCCTGGGATTTTGACCCCCAGCTGTCCAACAGAGGAGGGTCTGTGCCTTTGCTCATTAGCCTAACTTAGATGATAGGTGACAAACTGAAGTGAGCTATAGGGAGTTGTCCACTTCCAGGCTGCTATCAGTGTGACAGAGGTTATAAATGC	030	regLM	13	-0.0152316	1.47202	-0.923197	-0.14154	1.47192	-0.867616
gen_814	GTTTAGCGTAAGAATCAGGGTCCAGCTGGTGCTCCCTAAACAGCAGCTGCTGTTCACTGTTGAAAGGCGCTCTGGAAGGCCAGGCGCGGTGGCTCATGCTTGTAATCCCAGCACTGTGGGAGGCCGAGGTGGGCGGATCACCTGAGGTAAGGAGTTCGAGACCAGCCTGACCAATGTGGAGAAACCCCATCTCTCCTAAA	030	regLM	64	0.341744	3.06202	4.24711	0.57269	3.0618	1.85502
gen_815	TCTCTGCTCCCCAGAGTCCCTGCACGTGGCTTGACAGTGGCCTTGGTAGGACCCACTGGGGTGTTTCTTCGTCGCCCATGGGCCCTCATGCTGTTATCAGTTGGAAATGAATCAGAGATTAGGAAGCGGGGGGAGTGGTGGGGGTGTTATCGCCCAGTGCACACAGGTTACCACAGAGGTCACACGGTAGGTAAGGGCCA	030	regLM	23	0.903014	4.64972	-1.00018	0.811923	4.6496	-0.548067
gen_816	CTCAGAATTAATGGAGAGGGCCAGTGGCGGCCTGTGCCCTTTGTCCCACTGGCCGGCCTGGGGGTGGCGGCTCCAGAATACAGGGTCCTATCGTGTGCCCTGATGTCAGGCAGCTGGACTGCTGGGAGTGAGGATAAACAAGCAGCTGGAGCATCTCGCCTGAAGCCCCAGGAGAGGGCCAGAGCCCCTGCAGCAGCAGG	030	regLM	96	1.00177	0.218203	0.862877	1.42132	0.218222	0.601725
gen_817	TCCTGAATGGGCAAAAACTGGAAGCATTCCCTTTGAAAACTGGCACAAGACGGGGATGCCCTCTCTCACCGCTCCTATTCAACATAGTGTTGGAAGTTCTGGCCAGGGCAATCAGGCAGGAGAAATAAATAAAGGGTATTCAATTAGGAAAAGAGGAAGTCAAATTGTCCCTGTTTGCAGATGACATGACTGTATATTTG	030	regLM	21	-0.135156	0.332862	-0.463838	0.355397	0.33277	-0.0950751
gen_818	CCTGAGAAAGGCTTCAACTAAAGAGCTATGGACAGGGACACTCTGTCACTTCCTGGGATTTTGACCCCCAGCTGTCCAACAGAGGAGGGTCTGTGCCTTTGCTCATTAGCCTAACTTAGATGATAGGTGACAAACTGAAGTGAGCTATAGGGAGTTGTCCACTTCCAGGCTGCTATCACTACAGCCCATCTGGAAGCTGA	030	regLM	11	-0.0598686	4.49944	-0.858605	-0.178142	4.49944	-0.789755
gen_819	CCTGAGAAAGGCTTCAACTAAAGAGCTATGGACAGGGACACTCTGTCACTTCCTGGGATTTTGACCCCCAGCTGTCCAACAGAGGAGGGTCTGTGCCTTCGCTCATTAGCCTAACTTAGATGATAGGTGACAAACTGAAGTGAGCTATGGGGAGAGGTACCTCCCATTCCTCTCTGGGCCTGAATTTCCCTTTGTCAGCC	030	regLM	28	0.756286	1.19085	0.479108	0.017214	1.19095	0.00379959
gen_820	GTTTAGCGTAAGAATCAGGGTCCAGCTGGTGCTCCCTAAACAGCAGCTGCTGTTCACTGTTGAAAGGCGCTCTGGAAGGCCAGGTGCGGTGGCTCATGCTTGTAATCCCAGCACTGTGGGAGGCCGAGGTGGGCGGATCACCTGAGATAAGGAGTTCGAGACCAGCCTGACCAACGTGGAGAAACCCCATCTCTCCTAAA	030	regLM	61	0.161618	2.41956	1.44205	0.317203	2.41936	-0.0694599
gen_821	GTTTAGCGTAAGAATCAGGGTCCAGCTGGTGCTCCCTAAACAGCAGCTGCTGTTCACTGTTGAAAGGCGCTCTGGAAGGCCAGGTGCGGTGGCTCATGCTTGTAATCCCAGCACTGTGGGAGGCCGCGGTGGGCGGATCACCTGAGGTAAGGAGTTCGAGACCAGCCTGACCAACGTGGAGAAACCCCATCTCTCCTAAA	030	regLM	63	0.114746	2.36259	2.84384	0.343463	2.36266	0.523513
gen_822	TCTCTGCTCCCCAGAGTCCCTGCACGTGGCTTGACAGTGGCCTTGGTAGGACCCACTGGGGTGTTTCTTCGTCGCCCATGGGCCCTCATGCTGTTATCAGTTGGAAATGAATCAGAGATTAGGAAGCGGGGGGAGTGGTGGGGGTGGTATTGCGCCCTGGAGAACCAGACTACTGGGAGAGAGCGCCCTCCATTCCCGCT	030	regLM	31	0.939589	3.26117	-0.186828	0.507544	3.26109	0.193364
gen_823	CCAGTAATGGGATGGCTGGGTCCAATGGTATTTCTAGTTCTAGATCCCTGAGGAATCGCCACACTGACTTCCACAATGGTTGAACTAGTTTACAGTCCCACCAACAGTGTAAAATTATTCCTATTTCTCCACATCCTCTCCAGCACCTGTTGTTTCCTGCCTTTTTAATGATCGCCATTCTAACTGGTGTGAGATGGTGT	030	regLM	4	-0.487232	0.391448	-0.472943	-0.040014	0.391525	-0.385447
gen_824	CTACTTGGGAGGCTGAGACAGAAGAATGGCATGAACCTGGGAGACTGAGACAGGAGAATGGCATGAACCTGGGAGACGGAGGTTGCAGTGAGCCGAGATCGCGCCACTGCACTCCAGCCTGGGCGAGAGAGAGAGAGAGAGAGAGAGAGAGAGAGAGAGAGAGAGAGAGAGAGAGAGAGAGAGAGAGAGAGAGAGAGAGA	030	regLM	88	0.423374	2.43674	1.90005	0.300807	2.43647	0.643436
gen_825	TCTCTGCTCCCCAGAGTCCCTGCACGTGGCTTGACAGTGGCCTTGGTAGGACCCACTGGGGTGTTTCTTCGTCGCCCATGGGCCCTCATGCTGTTATCAGTTGGAAATGAATCAGAGATTAGGAAGCGGGGGGAGTGGTGGGGGTGTTATCGCCCAGTGCACACAGGTTACCACAGATGGAATGAGGGAATGCGGAAACC	030	regLM	23	1.44482	4.57249	-0.304969	0.77954	4.57239	-0.0573369
gen_826	CCTGAGAAAGGCTTCAACTAAAGAGCTATGGACAGGGACACTCTGTCACTTCCTGGGATTTTGACCCCCAGCTGTCCAACAGAGGAGGGTCTGTGCCTTCGCTCATTAGCCTAACTTAGATGATAGGTGACAAACTGAAGTGAGCTATGGGGAGAGGTACCTCATTTATCTGTTGCTGGGTGTGGCAAGGCCTATCCTTT	030	regLM	29	0.486682	2.20894	-0.195135	-0.0202631	2.2089	-0.51373
gen_827	ATATTGGTACAGCACATTTGTCGCTATTAATAAACCAGTATCCAGGGCCAGGTGCAGTGGCTCACGCCTGTAATCCCAGCACTTTGGGAGGCCGAGGTGGGTGGATCACCTGAGGTCAGGAGTTCAAGACCAGCCTGACCAACATGGGAAAACCCTGTCTCTACTAAAAATACAAAATTAGCTGGGCTTGGTGGTGCATG	030	regLM	45	-0.171796	2.64242	2.88946	0.23503	2.64256	0.789046
gen_828	CTCTCTATTACATTCCATTCTCCATTCCATTCCATTCTCCATTCCATTCCACTCCATTCTCCATTCCATTCCACTCCATTCTCCATTCCATTCCATTCTCCATTATATTCTCCATTCCATTCCATTCTCCATTACATTCCATTCTCCATTACATTCCATTCTCCATTACATTCCATTCTCCATTCCATTCCATTCCATTT	030	regLM	87	-0.583582	-0.243197	3.66672	-0.323472	-0.243208	-0.303194
gen_829	ATATTGGTACAGCACATTTGTCGCTATTAATAAACCAGTATCCAGGGCCAGGTGCAGTGGCTCACGCCTGTAATCCCAGCACTTTGAGAGGCCGAGGCAGGTGGATCACCTGAGGTCAGGAGTTCGAGACCAGCCTGACCAACATGGGAAAACCCTGTCTCTACTAAAAATACAAAATTAGCTGGGCTTGGTGGTGCATG	030	regLM	49	-0.32998	2.64388	3.32288	-0.150338	2.64399	0.157161
gen_830	GTTTAGCGTAAGAATCAGGGTCCAGCTGGTGCTCCCTAAACAGCAGCTGCTGTTCACTGTTGAAAGGCGCTCTGGAAGGCCAGGCGCGGTGGCTCATGCTTGTAATCCCAGCACTGTGGGAGGCCGAGGTGGGCGGATCACCTGAGGTAAGGAGTTCGAGACCAGCCTGACCAACGTGGAGAAACCCCATCTCTCCCAAA	030	regLM	64	0.295774	2.89799	3.82093	0.534724	2.89787	1.77092
gen_831	GTTTAGCGTAAGAATCAGGGTCCAGCTGGTGCTCCCTAAACAGCAGCTGCTGTTCACTGTTGAAAGGCGCTCTGGAAGGCCAGGTGCGGTGGCTCATGCTTGTAATCCCAGCACCGTGGGAGGCCGAGGTGGGCGGATCACCTGAGGTAAGGAGTTCGAGACCAGCCTGACCAACGTGGAGAAACCCCATCTCTCCTAAA	030	regLM	63	0.110888	2.44837	3.04598	0.261512	2.44843	0.569855
gen_832	CCTGAGAAAGGCTTCAACTAAAGAGCTATGGACAGGGACACTCTGTCACTTCCTGGGATTTTGACCCCCAGCTGTCCAACAGAGGAGGGTCTGTGCCTTTGCTCATTAGTCCATTTTACAGAGAGCTGATTGGTCTGTTTTACAGAGAGCTGATTGGTCTGTTCAAATGCTCTTTATTAAACAGCATTTGCCAATGCACT	030	regLM	47	3.57245	3.45543	4.23697	4.37892	3.45551	4.90538
gen_833	ATATTGGTACAGCACATTTGTCGCTATTAATAAACCAGTATCCAGGGCCAGGTGCAGTGGCTCACGCCTATAATCCCAGCACTTTGGGAGGCCGAGGCAGGTGGATCACCTGAGGTCAGGAGTTCGAGACCAGCCTGACCAACATGGGAAAACCCTGTCTCTACTAAAAATACAAAATTAGCTGGGCTTGGTGGTGCATG	030	regLM	49	-0.322544	2.81641	3.24465	-0.109917	2.8166	0.330147
gen_834	CCTGAGAAAGGCTTCAACTAAAGAGCTATGGACAGGGACACTCTGTCACTTCCTGGGATTTTGACCCCCAGCTGTCCAACAGAGGAGGGTCTGTGCCTTTGCTCATTAGCCTAACTTAGATGATAGGTGACAAACTGAAGTGAGCTATGGGGAGAGGTACCTCATTTATCTGTTGCTGGGTGTGGCAAGACCTAAGGCAA	030	regLM	27	0.128751	2.20304	-0.840584	-0.188272	2.20303	-0.780918
gen_835	GTTTAGCGTAAGAATCAGGGTCCAGCTGGTGCTCCCTAAACAGCAGCTGCTGTTCACTGTTGAAAGGCGCTCTGGAAGGCCAGGTGCGGTGGCTCATGCTTGTAATCCCAGCACTGTGGGAGGCCGAGGTGGGCGGATCACCTGAGGTAAGGGGTTCGAGACCAGCCTGACCAACGTGGAGAAACCCCATCTCTCCTAAA	030	regLM	63	0.083079	2.47529	3.37671	0.182528	2.47516	0.50847
gen_836	TCCTGAATGGGCAAAAACTGGAAGCATTCCCTTTGAAAACTGGCACAAGACAGGGATGCCCTCTCTCACCGCTCCTATTCAACATAGTGTTGGAAGTTCTGGCCAGGGCAATCAGGCAGGAGAAAGAAATAAAGGGTATTCAATTAGGAAAAGAGGAAGTCAAATTGTCCCTGTTTGCAGATGACATGACTGTATATCTA	030	regLM	18	-0.106668	0.0709684	-0.328152	0.271862	0.0709302	-0.0501802
gen_837	GTTTAGCGTAAGAATCAGGGTCCAGCTGGTGCTCCCTAAACAGCAGCTGCTGTTCACTGTTGAAAGGCGCTCTGGAAGGCCAGGTGCGGTGGCTCATGCTTGTAATCCCAGCACTGTGGGAGGCCGAGGTGGGCGGATCACCTGAGGTAAGAAGTTCGAGACCAGCCTGACCAACGTGGAGAAACCCCATCTCTCCTAAA	030	regLM	63	0.138285	2.34638	3.31708	0.337065	2.34637	0.455033
gen_838	GTTTAGCGTAAGAATCAGGGTCCAGCTGGTGCTCCCTAAACAGCAGCTGCTGTTCACTGTTGAAAGGCGCTCTGGAAGGCCAGGTGCGGTGGCTCATGCTTGTAATCCCAGCATTTTGGGAGGCCGAGGTGGGCGGATCACCTGAGGTAGGGAGTTCAAGACCAGCCTGACCAACGTGGAGAAACCCCATCTCTCCTAAA	030	regLM	62	-0.0838435	2.36842	2.84734	0.0600778	2.36849	0.462728
gen_839	TCTCTGCTCCCCGGAGTCCCTGCACGTGGCTTGACAGTGGCCTTGGTAGGACCCACTGGGGTGTTTCTTCGTCGCCCATGGGCCCTCATGCTGTTATCAGTTGGAAATGAATCAGAGATTAGGAAGCGGGGGGAGTGGTGGGGGTGTTATCGCCCAGTGCACACGGGGCTCTCAGCTAATCTCTGGCGGCGCTTAAAGGA	030	regLM	9	0.673564	5.49111	-0.164254	0.49771	5.49109	0.00664441
gen_840	CCATCTGTTCCATCCTCACCCACCCAAGGAGCCGCCCCTGCTCCTAGAGACTCTGGGCACCACTGATAAGGGTGGGTACCAGGAACTCCACCCTTTACCGAGAAAGGCAGGCTGGTTTATCGCCACTCAGACCCAGCCAGCGACCACCCTGGGGAGTGTGTCAGCCACCAGGAGCATCGCTGTTGGGGAATGGGTTGGTA	030	regLM	84	-0.0960055	7.25706	0.477018	-0.0424053	7.25709	1.18197
gen_841	ATTATGATACAGTCCAAGTATGTAACTTTCTGGGGACCAGACTTTGCTGAGAGTCATAATGGAGAGTCAAAGAGTCTGATGGCTGAGAGGGATGTGCCTGGGCTTGCCTTCATAAATGTTCATTGTCTCAGCCAAGGTTTTGGCAGGAGCGAGAACAGCCTCTGATCTCTGAAAACCGCAGGTCACAGTGAATACTTTCA	030	regLM	97	2.62766	0.353404	6.17536	2.9042	0.353393	4.72429
gen_842	CCAGTAATGGGATGGCTGGGTCCAATGGTATTTCTAGTTCTAGATCCCTGAGGAATCGCCACACTGACTTCCACAATGGTTGAACTAGTTTACAGTCCCACCAACAGTGTATAAGTGTTCCTATTTCTCCACATCCTCTCCAGCACCTGTTGTTTCCTGACTTTTTAATGATTGCCATTCTAACTGGTGTGAGATGGTAT	030	regLM	8	-0.471311	0.186717	-0.459318	-0.112445	0.186626	-0.525205
gen_843	CCTGAGAAAGGCTTCAACTAAAGAGCTATGGACAGGGACACTCTGTCACTTCCTGGGATTTTGACCCCCAGCTGTCCAACAGAGGAGGGTCTGTGCCTTCGCTCATTAGCCTAACTTAGATGATAGGTGACAAACTGAAGTGAGCTATAGGGAGTTGTCCACTTCCAGGCTGCTATCACTACAACCTGGGTGACATGACT	030	regLM	11	-0.0446919	0.601637	-0.691198	-0.169965	0.601685	-0.820787
gen_844	CCTCAGAATTAATGGAGAGGGCCAGTGGCGGCCTGTGCCCTTTGTCCCACCGGCCGGCCTGGGGGTGGCGGCTCCAGAATACAGGGTCCTATTGTGTGCCCTGATGTCAGGCAGCTGGACTGCTGGGAGTGAGGATAAACAAGCAGCTGGAGCATCTCGCCTGAAGCCCCAGGAGAGGGCCAGAGCCCCTGCAACAGGAA	030	regLM	99	3.16806	0.0933933	1.32996	2.38559	0.0934416	1.41168
gen_845	AGAATTGGAAGGAGCTTAGGGGAAAGCTAGCCTCAGGTCAGAATTGCCTGCATGCCACTCGGCTGGCTAGTGAGCTGCTGAATCACCTTATTCCTGGAGAAAGACTTTGATACTGAGAAAACTGACTTGCTCAGCTCTTGCTACAACTGTGACCATCTCTGCAACAGTTTTCTGTTGTTTAAGAGGTTCATGAACTGTTT	030	regLM	95	0.112758	1.01076	0.464163	-0.0245553	1.01072	0.322552
gen_846	GATTTTTCTACTGCTAGGTTTTCCTTTTGGGGTTACGATTATTACAGGTGGCAATCAGTTAACTTAGTGGTTCTGTAGGCACCGCCCTATCTTCCAACTCACTTACATTTAAAAATTCACACAGAGAGGCTAGTGGGAAGCGGGTAGGTGTAAACAATGTGCTACAGTGAGAAAGCTAGCGAGTCACTGGGGAAAGTTAT	030	regLM	99	1.26655	2.35719	0.42829	0.774561	2.35717	0.83265
gen_847	TCTCTGCTCCCCAGAGTCCCTGCACGTGGCTTGACAGTGGCCTTGGTAGGACCCACTGGGGTGTTTCTTCGTCGCCCATGGGCCCTCATGCTGTTATCAGTTGGAAATGAATCAGAGATTAGGAAGCGGGGGGAGTGGTGGGGGTGTTATCGCCCAGTGCACACGGGGCTCTCAGCTAATCTCTGGCGGCCCTGGGAGAA	030	regLM	5	0.772239	5.79622	-0.164434	0.830085	5.79618	0.129323
gen_848	CATTCCATTCCATTCCATTCTGCATTCTGTTCCATTCTCCATTCCATTCCATTCTCCATACCATCCTCCATTCCATTACACTGCATTCCATTCTCCATTATATTTTATTCACCACGGCATTCCATTACATTTTCCATTCCATTCTCCATTACATTCCATTCTCCATTACATTCCATATTCTATTCCTTTCATATTTTATT	030	regLM	93	-0.937076	-0.407608	4.51402	-0.36009	-0.407639	-0.594347
gen_849	CATGTTGCCTATGGTATTATAAGAATTGAAAGAAGGCCAGGCGCAGTGGCTCACACCTGTAATCCCAGCACTTTGGGAGGCTGAGGCAGGCAGATCACTTGAGGTCAGGAGTTCGAGACCAGCCTGGCCAACATGGTGAAACCCCATCTCTACTAAAAATACAAAAATTAGCTGGGTGTGGTGGTGCATGCCTGTAATCC	030	regLM	37	-0.165178	3.89431	2.74947	0.134684	3.89433	1.90968
gen_850	CCAGTAATGGGATGGCTGGGTCCAATGGTATTTCTAGTTCTAGATCCCTGAGGAATTGCCACACTGACTTCCACAATGGTTGAACTAGTTTACAGTCCCGCCAACAGTGTAAAATTATTCCTATTTCTCCACATCCTCTCCAGCACCTGTTGTTTCCTGCCTTTTTAATGATCGCCATTCTAACTGGTGTGAGATGGTAT	030	regLM	4	-0.537021	0.514289	-0.530669	-0.0123674	0.513955	-0.373095
gen_851	TGCACCCCCCCATCATTTTCTTCATTTGTATAATGAGGCTAATACCATGTGTACAACACCGCCGAAATGTACTGGCAGCTCCATATTTCCTTCTCTTATCTCATATTCATCTTTCCACATCTCCCATGAGAGTTTCTCAAGCTGATTAAATTCCTATCCAACATATGTCAGATACATAATTTCAAAACAAGGTTCTTTTC	030	regLM	97	-0.16342	0.218209	1.55317	0.015099	0.218264	-0.475389
gen_852	CCATCTGTTCCATCCTCACCCACCCAAGGAGCCGCCCCTGCTCCTAGAGACTCTGGGCACCACTGATAAGGGTGGGTACCAGGAACTCCACCCTTTACCGAGAAAGGCAGGCTGGTTTATCGCCACTCAGACCCAGCCAGCAACCACCCTGGGGAGTGTGTCAGCCACCAGGAGCATCGCTGTTGGGAAGAGGGCATGTG	030	regLM	84	0.294918	8.01803	0.874558	0.200941	8.01797	1.65215
gen_853	GATTTTTCTACTGCTAGGTTTTCCTTTTGGGGTTACGATTATTACAGGTGGCAATCAGTTAACTTAGTGGTTCTGTAGGCACCGCCCTATCTTCCAACTCACTTACATTTAAAAATTCACACAGAGAGGCTAGTGGGAAGCGGGTAGGTGTAAACAATGTGCTACAGTGAGAAACCTGGGGCGTTTGTAAAGGTTTAAGC	030	regLM	99	0.617733	1.44704	0.173708	0.279822	1.44706	0.190178
gen_854	AGAATTGGAAGGAGCTTAGGGGAAAGCTAGCCTCAGGTCAGAATTGCCTGCATGCCACTCGGCTAGTGAGCTGCTGAATCACCTTATTCCTGGAGAAAGACTTTGATACTGAGAAAACTGACTTGCTCAGCTCTTGCTACAACTGTGACCATCTCTGCAACAGTAAAGTAAAAACAAATACCTCTCTTGTTGGGTAATAG	030	regLM	94	0.355336	1.1795	0.25066	0.141723	1.17945	0.515109
gen_855	CCAGTAATGGGATGGCTGGGTCCAATGGTATTTCTAGTTCTAGATCCCTGAGGAATTGCCACACTGACTTCCACAATGGTTGAACTAGTTTACAGTCCCGCCAACGGTGTAAAATTGTTCCTATTTCTCCACATCCTCTCCAGCACCTGTTGTTTCCTGACTTTTTAATGATTGCCATTCTAACTGGTGTGAGATGGTAT	030	regLM	8	-0.556092	0.143798	-0.572013	-0.141113	0.143662	-0.527416
gen_856	ATTAGCATGGAATTTGGACTTTGGAGCCATAATCCTGTTGTCTTCTTTCATTTAAAGAATATGGGCCAGGCGCGGTGGCTCACACCTGTAATCCCAGCACTTTGGGAGGCCGAGGCGGGTAGATCACGAGGTCAGGAGATCGAGACCATCCTGGCTAACACAGTGAAACCCTGTCTCTACTAAAAATACAAAAAAATTAG	030	regLM	58	0.0808813	2.61239	1.67357	0.737116	2.61202	1.48402
gen_857	CCAGTAATGGGATGGCTGGGTCCAATGGTATTTCTAGTTCTAGATCCCTGAGGAATCGCCACACTGACTTCCACAATGGTTGAACTAGTTTACAGTCCCACCAACAGTGTAAAATTATTCCTATTTCTCCACATCCTCTCCAGCATCTGTTGTTTCCTGCCTTTTTAATGATCGCCATTCTAACTGGTGTGAGATGGTAT	030	regLM	4	-0.51844	0.464093	-0.372272	0.0169099	0.464148	-0.363234
gen_858	CTAGCTGTACCAGCCGCTGCCCCGGACCTGCTGCCCTGCCCCACCCCCCCCTCCCCTGGCCAGCCTCCCCAGAGGCCAGAAGGCGCCTTATCGGGCAGGATTAAGGAGGGGGACAGTTATCAGGGGCTGCAGCCTAGCAGGTCCCTGGCAGGGTCCTCATTGTCAAGCGGGGTCAGGGGTGGGGATTAGGGGAGGGGGTG	030	regLM	35	0.904213	3.73994	0.65255	1.4217	3.73989	0.86271
gen_859	GATTTTTCTACTGCTAGGTTTTCCTTTTGGGGTTACGATTATTACAGGTGGCAATCAGTTAACTTAGTGGTTCTGTAGGCACCGCCCTATCTTCCAACTCACTTACATTTAAAAATTCACACAGAGAGGCTAGTGGGAAGCGGGTAGGTGTAAACAATGTGCTACAGTGAGTCACACCCGTCACAGGAGCTCTCTGGGGT	030	regLM	100	2.89196	3.77146	0.391515	3.09913	3.77137	1.22563
gen_860	TCTCTGCTCCCCAGAGTCCCTGCACGTGGCTTGACAGTGGCCTTGGTAGGACCCACTGGGGTGTTTCTTCGTCGCCCATGGGCCCTCATGCTGTTATCAGTTGGAAATGAATCAGAGATTAGGAAGCGGGGGGAGTGGTGGGGGTGTTATCGCCCAGTGCACACAGGTTACCACAGAGGTCACACGGTATATGCGCTCCT	030	regLM	22	0.920094	5.23873	-0.594031	0.910845	5.23879	-0.359521
gen_861	TCTCTGCTCCCCGGAGTCCCTGCACGTGGCTTGACAGTGGCCTTGGTAGGACCCACTGGGGTGTTTCTTCGTCGCCCATGGGCCCTCATGCTGTTATCAGTTGGAAATGAATCAGAGATTAGGAAGCGGGGGGAGTGGTGGGGGTGTTATCGCCCAGTGCACACGGGGCTCTCAGGCCTGCCCGGGTCGAGGCTGGAGAC	030	regLM	16	0.745025	5.39598	0.0135695	0.587786	5.39595	0.17805
gen_862	CCTAGAGACTCTGGGCACCACTGATAAGGGTGGGTACCAGGAACTCCACCCTTTACCGAGAAAGGCAGGCTGGTTTATCGCCACTCAGACCCAGCCAGCGACCACCCTGGGGAGTGTGTCAGCCACCAGGAGCATCGCTGTTGGGGAAATGTTATTAACTAGGAAGGTTTTTGCCTCTGGCAGGTTATTAAATATTAATC	030	regLM	20	0.142997	5.89919	0.121505	0.0221624	5.89916	1.17827
gen_863	TCTCTGCTCCCCAGAGTCCCTGCACGTGGCTTGACAGTGGCCTTGGTAGGACCCACTGGGGTGTTTCTTCGTCGCCCATGGGCCCTCATGCTGTTATCAGTTGGAAATGAATCAGAGATTAGGAAGCGGGGGGAGTGGTGGGGGTGTTATCGCCCAGTGCACACAGGTTACCACAGACGTTTAACAGCAGGCAACCAGGT	030	regLM	23	1.12188	5.18128	-0.633446	0.787777	5.18127	-0.305371
gen_864	GAAAGGATACTCTGGCTGTCATGTGGACTGGAGGGAGCTGGAATTGAGGCAGTGAGCCCAGCTACCAGAGTCTTGAAATAGTTTAGTGTAAGATGCTGAGTCATGAGTTGGGGCAGAGAGGATAACAAAGTAGGGAAGTGGGGGTAGAGACAGTCGTAAGACCTGAGGAGGGAATGGCTAAGTGAGGGTTGAAGGAGAAG	030	regLM	94	1.21031	5.21292	2.44982	0.896829	5.21291	2.84033
gen_865	CCATCTGTTCCATCCTCACCCACCCAAGGAGCCGCCCCTGCTCCTAGAGACTCTGGGCACCACTGATAAGGGTGGGTACCAGGAACTCCACCCTTTACCAAGAAAGGCAGGCTGGTTTATCGCCACTCAGACCCAGCCAGCGACCACCCTGGGGAGTGTGTCAGCCACCAGGAGCATCGCTGTTGGGGAATGGGTTGGTA	030	regLM	84	-0.213477	6.50172	0.32758	-0.123016	6.50168	1.06876
gen_866	ATTAGCATGGAATTTGGACTTTGGAGCCATAATCCTGTTGTCTTCTTTCATTTAAAGAATATGGGCCAGGCGCGGTGGCTCACGCCTGTAATCCCAGCACTTTGGGAGGCCGAGGCGGGTGGATCATGAGGTCAGGAGATCGAGACCATCCTGGCTAACACAGTGAAACCCTGTCTCTACTAAAAATACAAAAAAATAGG	030	regLM	58	0.257014	3.0263	1.33782	1.00815	3.02659	1.62281
gen_867	CCATCTGTTCCATCCTCACCCACCCAAGGAGCCGCCCCTGCTCCTAGAGACTCTGGGCACCACTGATAAGGGTGGGTACCAGGAACTCCACCCTTTACCGAGAAAGGCAGGCTGGTTTATCGCCACTCAGACCCAGCCAGCGACCGCCCTGGGGAGTGTGTCAGCCACCAGGAGCATCGCTGTTGGGGAAATGTTATCTC	030	regLM	85	0.735264	8.09111	0.920383	1.02482	8.09101	1.82171
gen_868	CCAGTAATGGGATGGCTGGGTCCAATGGTATTTCTAGTTCTAGATCCCTGAGGAATCGCCACACTGACTTCCACAATGGTTGAACTAGTTTACAGTCCCACCAACAGTGTAAAATTATTCCTATTTCTCCACATCCTCTCCAGCACCTGTTGTTTCCTGACTTTTTAATGATCGCCATTCTAACTGGTGTGAGATAGTAT	030	regLM	5	-0.539697	0.166352	-0.486707	-0.174612	0.166361	-0.519605
gen_869	GTTTAGCGTAAGAATCAGGGTCCAGCTGGTGCTCCCTAAACAGCAGCTGCTGTTCACTGTTGAAAGGCGCTCTGGAAGGCCAGGTGCGGTGGCTCATGCTTGTAATCCCAGCACTGTGGGAGGCCGAGGTGGGCGGATCACCTGAGGTAAGGAGTTCCAGACCAGCCTGACCAACGTGGAGAAACCCCATCTCTCCTAAA	030	regLM	62	0.324787	0.967498	1.38029	0.634819	0.967258	-0.111795
gen_870	CCATCTGTTCCATCCTCACCCACCCAAGGAGCCGCCCCTGCTCCTAGAGACTCTGGGCACCACTGATAAGGGTGGGTACCAGGAACTCCACCCTTTACCGAGAAAGGCAGGCTGGTTTATCGCCACTCAGACCCAGCCAGCGACCACCCTGGGGAGTGTGTCAGCCACCAGGAGCATCGCTGTTGGGGAAACTTTTCTGC	030	regLM	84	0.108375	7.458	0.553652	0.0654439	7.458	1.37658
gen_871	TCTCTGCTCCCCAGAGTCCCTGCACGTGGCTTGACAGTGGCCTTGGTAGGACCCACTGGGGTGTTTCTTCGTCGCCCATGGGCCCTCATGCTGTTATCAGTTGGAAATGAATCAGAGATTAGGAAGCGGGGGGAGTGGTGGGGGTGTTATCGCCCAGTGCACACAGGTTACCACAGACATTTAGCCCTCACTGCAGCGGG	030	regLM	22	0.899336	5.22181	-0.405336	0.537632	5.22178	-0.0575854
gen_872	CCAGTAATGGGATGGCTGGGTCCAATGGTATTTCTAGTTCTAGATCCCTGAGGAATTGCCATACTGACTTCCACAATGGTTGAACTAGTTTACAGTCCCGCCAACAGTGTAAAATTATTCCTATTTCTCCACATCCTCTCCAGCACCTGTTGTTTCCTGACTTTTTAATGATCGCCATTCTAACTGGTGTGAGATGGTAT	030	regLM	6	-0.596381	0.129782	-0.506932	-0.23193	0.129687	-0.508403
gen_873	TCATTTGAAGATGGAGGCAGAGATTGGAGTGATACAACTATAAGTCAGGGAATGCCAAGGACTTGAGGTCATGTGTTACAGAAGCCCTAGGAAATGAGTCAATTTCCTGGCACAGCACTAAGACATGCTGGTATTCTTCATTCCATCCCTTTCCCCTATTCCTAAATGTGCTCCAGGCACAGAGCGTTGTATCCTCATTA	030	regLM	96	0.80575	-0.0667781	5.71761	3.57326	-0.0667601	6.37638
gen_874	GTTTAGCGTAAGAATCAGGGTCCAGCTGGTGCTCCCTAAACAGCAGCTGCTGTTCACTGTTGAAAGGCGCTCTGGAAGGCCAGGTGCGGTGGCTCATGCTTGTAATCCCAGCACTGTGGGAGGCCGAGGTGGGCGGATCACCTGAGGTAAGGAGTTCGAGACCAGCCTGACCAACTTGGAGAAACCCCATCTCTCCTAAA	030	regLM	62	0.0890786	2.56238	3.27099	0.194687	2.56244	0.5846
gen_875	TCTCTGCTCCCCGGAGTCCCTGCACGTGGCTTGACAGTGGCCTTGGTAGGACCCACTGGGGTGTTTCTTCGTCGCCCATGGGCCCTCATGCTGTTATCAGTTGGAAATGAATCAGAGATTAGGAAGCGGGGGGAGTGGTGGGGGTGTTATCGCCCAGTGCACACAGGGTCCCATTCATTCATTCATTCATTCATTCATTC	030	regLM	21	0.298235	3.60188	-1.05173	-0.0539723	3.60153	-0.19005
gen_876	ACTGGGATTGCTTGGTTGAATGGTAGTTCCATTTTTAGTTCTTTGAGAAATCTCCAAACTGTTTTCCACAGCAGCTTAACTAATTTACATTCCCACCAGCACTGTCTTAAGTGTTTCCTTTTCTCCGCAGCCTTGCCAACATCTGTAATTTTTTGACTTTTTAATGATATTCTTTATGACTGGTGCAAGATGGTATCTCA	030	regLM	51	0.0843882	0.826592	0.59885	0.317764	0.826649	0.290976
gen_877	TCTCTGCTCCCCGGAGTCCCTGCACGTGGCTTGACAGTGGCCTTGGTAGGACCCACTGGGGTGTTTCTTCGTCGCCCATGGGCCCTCATGCTGTTATCAGTTGGAAATGAATCAGAGATTAGGAAGCGGGGGGAGTGGTGGGGGTGTTATCGCCCAGTGCACACGGGGCTCTCAGGCAATGCCAGTTAATATTTGCCTCC	030	regLM	17	0.61655	4.83977	-0.389946	0.146478	4.83979	-0.215369
gen_878	CCAGTAATGGGATGGCTGGGTCCAATGGTATTTCTAGTTCTAGATCCCTGAGGAATTGCCACACTGACTTCCACAGTGGTTGAACTAGTTTACAGTCCCGCCAACAGTGTAAAATTATTCCTATTTCTCCACATCCTCTCCAGCACCTGTTGTTTCCTGACTTTTTAATGATCGCCATTCTAACTGGTGTGAGATGGTAT	030	regLM	6	-0.573977	0.113655	-0.547448	-0.112757	0.113642	-0.487346
gen_879	CCTGAGAAAGGCTTCAACTAAAGAGCTATGGACAGGGACACTCTGTCACTTCCTGGGATTTTGACCCCCAGCTGTCCAACAGAGGAGGGTCTGTGCCTTCGCTCATTAGCCTAACTTAGATGATAGGTGACAAACTGAAGTGAGCTATGGGGAGAGGTACCTCACTTGACTCAAATGTGTTCAAAGTATGCTACAGGGTA	030	regLM	27	-0.275121	0.0297427	-0.588193	-0.229388	0.0297978	-0.861173
gen_880	ACTGGGATTGCTTGGTTGAATGGTAGTTCCATTTTTAGTTCTTTGAGAAATCTCCAAACTGCTTTCCACAGCAGCTTAACTAATTTACATTCCCACCAGCACTGTCTTAAGTGTTTCCTTTTCTCCGCAGCCTTGCCAACATCTGTAATTTTTTGACTTTTTAATGATATTCTTTATGACTGGTGCAAGATTGTAACCCA	030	regLM	55	-0.00235683	0.444912	0.57254	0.246874	0.444996	0.458533
gen_881	CCAGTAATGGGATGGCTGGGTCCAATGGTATTTCTAGTTCTAGATCCCTGAGGAATTGCCACACTGACTTCCACAATGGTTGAACTAGTTTACAGTCCCACCAACAGTGTATAAGTGTTCCTATTTCTCCACATCCTCTCCAGCACCTGTTGTTTCCTGACTTTTTAATGATTGCCATTCTAACTGGTGTGAGATGGTAT	030	regLM	9	-0.50306	0.249812	-0.457498	-0.114313	0.249984	-0.554134
gen_882	CTGTTTGTGCTGTGTGTTTCCAATAATTGACAACATATGTGATTTTGTTATTCTACACTGAGCTTGCTTCGTCTGCATATTCATTAAAAAAGAATTTTTAAAATCTTTGTCAGATGTTCTACATCTGAATCATCTTCTAGTATTAAACCACAGCCAAGAACTTTTATATCTTTTATCACATTAATATAAATATTAAACCA	030	regLM	96	-0.203312	-0.820865	3.33048	0.378436	-0.820727	1.64536
gen_883	CCTGAGAAAGGCTTCAACTAAAGAGCTATGGACAGGGACACTCTGTCACTTCCTGGGATTTTGACCCCCAGCTGTCCAACAGAGGAGGGTCTGTGCCTTTGCTCATTAGCCTAACTTAGATGATAGGTGACAAACTGAAGTGAGCTATAGGGAGTTGTCCACTTCCAGGCTGTTATCCATCCAGCTTGACCTCTGTGGGC	030	regLM	13	-0.0126215	0.521083	-0.689686	-0.14004	0.521022	-0.846051
gen_884	GTTTAGCGTAAGAATCAGGGTCCAGCTGGTGCTCCCTAAACAGCAGCTGCTGTTCACTGTTGAAAGGCGCTCTGGAAGGCCAGGTGCGGTGGCTCATGCTTGTAATCCCAGCACTGTGGGAGGCCGAGGTGGGCGGATCACCTGAGGTAAGGAGTTCGAGACCAGCCTGACCAATGTGGAGAAACCCCATCTCTCCTAAA	030	regLM	63	0.119333	2.72	3.23664	0.300539	2.71996	0.733489
gen_885	GATTTTTCTACTGCTAGGTTTTCCTTTTGGGGTTACGATTATTACAGGTGGCAATCAGTTAACTTAGTGGTTCTGTAGGCACCGCCCTATCTTCCAACTCACTTACATTTAAAAATTCACACAGAGAGGCTAGTGGGAAGCGGGTAGGTGTAAACAATGTGCTACAGTGAGTCACACCCGTCACAGAACAACAGTGTGGT	030	regLM	99	2.42717	3.60655	0.190233	2.22051	3.60667	0.84439
gen_886	CCTCAGAATTAATGGAGAGGGCCAGTGGCGGCCTGTGCCCTTTGTCCCACTGGCCGGCCTGGGGGTGGCGGCTCCAGAATACAGGGTCCTATTGTGTGCCCTGATGTCAGGCAGCTGGACTGCTGGGAGTGAGGATAAACAAGCAGCTGGAGCAGCTGGAGCATCTCGCCTGAAGCCCCAGGAGAGGGCCAGAGCCCCTG	030	regLM	97	3.11071	0.263378	1.86875	2.47785	0.263305	1.21645
gen_887	ATTAGCATGGAATTTGGACTTTGGAGCCATAATCCTGTTGTCTTCTTTCATTTAAAGAATATGGGCCGGGCGCGGTGGCTCACACCTGTAATCCCAGCACTTTGGGAGGCCGAGGCGGGTGGATCATGAGGTCAGGAGATCGAGACCATCCTGGCTAACACAGTGAAACCCTGTCTCTACTAAAAATACAAAAAATTAGC	030	regLM	58	0.0631137	2.70918	0.807595	0.770324	2.70923	0.908986
gen_888	AGAATTGGAAGGAGCTTAGGGGAAAGCTAGCCTCAGGTCAGAATTGCCTGCATGCCACTCGGCTAGTGAGCTGCTGAATCACCTTATTCCTGGAGAAAGATTTTGTTTTTTATTTTATTTTATTTTATTTTATTTTATTTTATTTTATTTTATTTTATTTTATTTTATTTTATTTTATTTTACTTTAAGATGAAGTCTCA	030	regLM	97	0.489293	0.583717	1.06511	0.470792	0.583672	1.50067
gen_889	TCTCTGCTCCCCAGAGTCCCTGCACGTGGCTTGACAGTGGCCTTGGTAGGACCCACTGGGGTGTTTCTTCGTCGCCCATGGGCCCTCATGCTGTTATCAATTGGAAATGAATCAGAGATTAGGAAGCGGGGGGAGTGGTGGGGGTGTTATCGCCCAGTGCACACAGGTTACCACAGAGGTCACACGGTAGGTGAGGGGTA	030	regLM	22	0.261669	3.46466	-1.14351	0.216493	3.46472	-0.624109
gen_890	GATGGGTGCCTCTCCATGGAGCTCACATGTCATACTGCGCCCTGACTCATCACATGTCATTGTTCCTTTGTATTAATTTTCTGTCATCTACAGTGAGTTCCTTGAGGGCAGGGAAAGGGCTTTTTATCTCTGCATTACCAGAGCCCAACAGATACACACTGGTTCTTATCAGTAAATATTTATTAAATATTTACTAAAAA	030	regLM	20	1.16088	4.66021	0.125911	1.69789	4.66005	0.255492
gen_891	ACTGGGATTGCTTGGTTGAATGGTAGTTCCATTTTTAGTTCTTTGAGAAATCTCCAAACTGCTTTCCACAGCAGCTTAACTAATTTACATTCCCACCAGCACTGTCTTAAGTGTTTCCTTTTCTCCGCAGCCTTGCCAACATCTGTAATTTTTTGACTTTTTAATGATAGCCATTCTAACTGGTGTGAGATGGTATCTCA	030	regLM	46	0.0921413	1.12705	0.617405	0.314513	1.12682	0.0149083
gen_892	TCTCTGCTCCCCAGAGTCCCTGCACGTGGCTTGACAGTGGCCTTGGTAGGACCCACTGGGGTGTTTCTTCGTCGCCCATGGGCCCTCATGCTGTTATCAGTTGGAAATGAATCAGAGATTAGGAAGCGGGGGGAGTGGTGGGGGTGTTATCGCCCAGTGCACACGGGGCTCTCAGCTAATCTCTGGCGGCCCTGGGTACA	030	regLM	3	0.687823	5.70523	-0.265092	0.771016	5.70523	0.0977291
gen_893	CCTGAGAAAGGCTTCAACTAAAGAGCTATGGACAGGGACACTCTGTCACTTCCTGGGATTTTGACCCCCAGCTGTCCAACAGAGGAGGGTCTGTGCCTTTGCTCATTAGCCTAACTTAGATGATAGGTGACAAACTGAAGTGAGCTATGGGGAGAGGTACCTCATTTATCTGTTGCTGGGTGTGACAGGGCCGCTCCTGC	030	regLM	27	-0.0532808	1.31381	-0.578454	-0.192257	1.31382	-0.822943
gen_894	GTAAAATCCTCACAGCCATCTCTGACGCTGCTAACCACAGGCATTCAGGAACAGTCTTGCTCCAAATCCTGCCTCCTATTTTCATATTTCCTGTGGCGTTTTATAGAAATAGCAGAACAATTGCTCATCCACAGGGGGTAAAGGGAGCAGGATTTTATATAATTAAATTTCAATTCTAGGATTCAAGGCTGGTTAGCAAC	030	regLM	100	0.566108	0.0857953	4.96398	1.66092	0.0857628	5.37852
gen_895	CTGTTTGTGCTGTGTGTTTCCAATAATTGACAACATATGTGATTTTGTTATTCTACACTGAGCTTGCTTCGTCTGCATATTCATTAAAAAAGAATTTTTAAAATCTTTGTCAGATGTTCTACATCTGAATCATCTTCTAGTATTAAACCACAGCCAAGAACTTTTATATCTTTTATCACATTAATATAAAGATTCCAGGA	030	regLM	95	-0.250835	-0.725879	3.37808	0.404139	-0.725913	1.57625
gen_896	TCTCTGCTCCCCAGAGTCCCTGCACGTGGCTTGACAGTGGCCTTGGTAGGACCCACTGGGGTGTTTCTTCGTCGCCCATGGGCCCTCATGCTGTTATCAGTTGGAAATGAATCAGAGATTAGGAAGCGGGGGGAGTGGTGGGGGTGTTATCGCCCAGTGCACACGGGGCTCTCAGCTAATCGGGATGGAATCCAGGAACA	030	regLM	14	1.32453	5.67732	0.25277	0.639872	5.67734	0.46839
gen_897	CCCGAATACTGTGCTTTTCCGACGGGCTTAGGAAACGGCACACCAGGATATTATATCCTGCACCTGGCTCGGAGGGTCCTACGTGCACGGAGTCTCGCTGATTGCTAGCACAGAAGTCTGAGATCAAACTGCAAGGCGGCAGCGAGGCTGGGGGAGGGGTGCCCGCCATTGCCCAGGCTTGCTTTGGCCTCAGACTCCCG	030	regLM	99	0.68816	-0.152802	1.39599	1.53447	-0.152871	0.356778
gen_898	CCTAGAGACTCTGGGCACCACTGATAAGGGTGGGTACCAGGAACTCCACCCTTTACCGAGAAAGGCAGGCTGGTTTATCGCCACTCAGACCCAGCCAGCGACCACCCTGGGGAGTGTGTCAGCCACCAGGAGCATCGCTGTTGGGGAAATGTTATTAACTAGGAAGGTTTTTGCCTCTGGCAGGTTATTAAATATTGCTG	030	regLM	21	-0.0498876	5.87213	-0.0162236	-0.0815177	5.87214	1.21109
gen_899	TACTACTAAAACCACAGGAATGTTCCAGGGAAACAGACTATCATCACTGAGCGAGGTGGAATCCAGCCAAAACCCCAGGCTAACATCCAGATGCCTGCATATCAGCTAAAATCCTTTTAAAGGACTTGGAATCTCCAGATACTAGTTTTAAGTCTTTTCTGGGAACTGGGAGTTTGTACTGGAGGCCACTTAACTGTTTC	030	regLM	98	0.358421	1.37635	4.0175	0.734311	1.3761	1.42342
gen_900	AGAAAAAAACAAACAACCCCATCAACAAGTGGGCGAAGGATATGAACAGACACTTCTCAAAAGAAGATATTTATTCAACCAAAAGACACATGAAAAAATGCTCATCATCACTGGCCATCAGAGAAATGCAAATCAAAACCACAATGAGATACCATCTCACACCAGTTAGAATGGCGATCATTAAAAAGTCAGGAAACAAC	030	regLM	44	-0.53401	0.363194	-0.0257144	-0.229428	0.363217	-0.357397
gen_901	TCTCTGCTCCCCAGAGTCCCTGCACGTGGCTTGACAGTGGCCTTGGTAGGACCCACTGGGGTGTTTCTTCGTCGCCCATGGGCCCTCATGCTGTTATCAGTTGGAAATGAATCAGAGATTAGGAAGCGGGGGGAGTGGTGGGGGTGTTATCGCCCAGTGCACACAGGTTACCACAGATGGAATAAGGGAAGCCAGGCCCG	030	regLM	21	0.793185	5.0713	-0.534864	0.294521	5.07122	-0.118343
gen_902	TCTCTGCTCCCCGGAGTCCCTGCACGTGGCTTGACAGTGGCCTTGGTAGGACCCACTGGGGTGTTTCTTCGTCGCCCATGGGCCCTCATGCTGTTATCAGTTGGAAATGAATCAGAGATTAGGAAGCGGGGGGAGTGGTGGGGGTGTTATCGCCCAGTGCACACGGGGCTCTCAGCTAATCTCTGGCGGCCCTGGGTTTG	030	regLM	2	0.739336	5.67506	-0.242078	0.844877	5.67513	0.102994
gen_903	GATTTTTCTACTGCTAGGTTTTCCTTTTGGGGTTACGATTATTACAGGTGGCAATCAGTTAACTTAGTGGTTCTGTAGGCACCGCCCTATCTTCCAACTCACTTACATTTAAAAATTCACACAGAGAGGCTAGTGGGAAGCGGGTAGGTGTAAACAATGTGCTACAGTGAGAAAGATACTGGCCAGTCCCATGACTCAGA	030	regLM	101	1.47656	4.62641	0.565435	1.34843	4.62639	1.15817
gen_904	CTAGCTGTACCAGCCGCTGCCCCGGACCTGCTGCCCTGCCCCACCCCCCCCTCCCCTGGCCAGCCTCCCCAGAGGCCAGAAGGCGCCTTATCGGGCAGGGTTAAGGAGGGGGACAGTTATCAGGGGCTGCAGCCTAGATTGGGCCACAATGTCCTCGTCTCTTGAGGGTGGCAGGCTGTGCAGGCTCCCTGACAAGGGGC	030	regLM	7	0.515067	4.67761	0.750067	0.292369	4.67778	0.738299
gen_905	CAGAATTTTAAGCGGCTCAATTTACTTTCGTGTTATTTTTAATAACAATGACCATAGTAATGCCTTTTCCCCCTTAAAATGTACAGGCTTATTCAAATAAAATGAGAAATGCCAATGGAATATACTCATCTGGGAAATTACATTTTAACGTCATAGCCAAGGAACTGTGCAATGGCAAAGGCAAATCTAAAGATTGTAAA	030	regLM	97	0.298049	0.0845496	2.58349	0.0489946	0.0845475	0.754711
gen_906	TCTCTGCTCCCCAGAGTCCCTGCACGTGGCTTGACAGTGGCCTTGGTAGGACCCACTGGGGTGTTTCTTCGTCGCCCATGGGCCCTCATGCTGTTATCAGTTGGAAATGAATCAGAGATTAGGAAGCGGGGGGAGTGGTGGGGGTGTTATCGCCCAGTGCACACAGGTTACCACAGAGGTCACACGGTATATGTGCTCCT	030	regLM	22	0.952597	5.14209	-0.668822	0.832662	5.14203	-0.414697
gen_907	ATTATGATACAGTCCAAGTATGTAACTTTCTGGGGACCAGACTTTGCTGAGAGTCATAATGGAGAGTCAAAGAGTCTGATGGCTGAGAGGGATGTGCCTGGGCTTGCCTTCATAAATGTTCATTGTCTCAGCCAAGGTTTTGGCAGGAGCGAGAGCAGGCTCAGATCAGTGTCACAGGCAGTACCTTACGTGACTTGGCT	030	regLM	94	2.42071	0.165695	6.4475	2.56615	0.165675	4.00197
gen_908	TCTCTGCTCCCCAGAGTCCCTGCACGTGGCTTGACAGTGGCCTTGGTAGGACCCACTGGGGTGTTTCTTCGTCGCCCATGGGCCCTCATGCTGTTATCAGTTGGAAATGAATCAGAGATTAGGAAGCGGGGGGAGTGGTGGGGGTGTTATCGCCCAGTGCACACAGGTTACCACAGACATTTAGCCCTGGAGGCAGCTTC	030	regLM	20	1.05322	4.85999	-0.270159	0.547381	4.85985	-0.0260469
gen_909	CCAGTAATGGGATGGCTGGGTCCAATGGTATTTCTAGTTCTAGATCCCTGAGGAATTGCCACACTGACTTCCACAATGGTTGAACTAGTTTACAGTCCCGCCAACAGTGTAAAATTATTCCTATTTCTCCACATCCTCTCCAGCACCTGTTGTTTCCTGCCTTTTTTGTTTGCCTTTTTTTCTTTCTTTCTTTCTTTCTT	030	regLM	25	-0.129509	0.177926	-0.350546	0.227707	0.177877	-0.061508
gen_910	CCTGAGAAAGGCTTCAACTAAAGAGCTATGGACAGGGACACTCTGTCACTTCCTGGGATTTTGACCCCCAGCTGTCCAACAGAGGAGGGTCTGTGCCTTTGCTCATTAGCCTAACTTAGATGATAGGTGACAAACTGAAGTGAGCTATAGGGAGTTGTCCACTTCCAGGCTGCTATCAGTACACCAGCTGCCTTGGCCAC	030	regLM	7	0.0206425	3.38082	-0.621726	-0.183959	3.38049	-0.861821
gen_911	CATGTTGCCTATGGTATTATAAGAATTGAAAGAAGGCCAGGCGCAGTGGCTCACACCTGTAATCCCAGCACTTTGGGAGGCTGAGGCAGGCAGATCACTGGAGGTCAGCAGTTCGAGACCAGCCTGGCCAACATGGTGAAACCCCATCTCTACTAAAAATACAAAAATTAGCCAGGCATGGTGGTGCACACCTGTAATCC	030	regLM	45	-0.3079	3.30525	2.99279	-0.191931	3.30499	0.539872
gen_912	AAACAAATTATGTAGAAGCCAAACCATTTTACTTCCCTCACTGTAGACCACACATAGCAACACAGTCTGTGTCTTTGTTCATGTTTTTAGAATTCCATCGACAGAGAGGAGAAAATACATCTGGGGAATTTGCCGCTGCTCTGAGTTCCAAAGTCCAAACCAATGTAATTGTTTCGGAATAACGGATGACACTTTTAGCT	030	regLM	100	2.58388	0.90845	0.467041	2.58303	0.908562	1.31968
gen_913	CCAGTAATGGGATGGCTGGGTCCAATGGTATTTCTAGTTCTAGATCCCTGAGGAATTGCCACACTGACTTCCACAATGGTTGAACTAGTTTACAGTCCCGCCAACAGTGTAAAATTATTCCTATTTCTCCACATCCTCTCCAGCACCTGTTGTTTCCTGCCTTTTTTGTTTGTTTTTTTGTTTTTTGAGACGGAGTCTCG	030	regLM	24	-0.194683	0.452429	-0.33173	0.242707	0.452425	-0.0484409
gen_914	GTTTAGCGTAAGAATCAGGGTCCAGCTGGTGCTCCCTAAACAGCAGCTGCTGTTCACTGTTGAAAGGCGCTCTGGAAGGCCAGGTGCGGTGGCTCATGCTTGTAATCCCAGCACTTTGGGAGGCCGAGGTGGGCGGATCACCTGAGGTAGGGAGTTCAAGACCAGCCTGACCAACGTGGAGAAACCCCATCTCTCCTAAA	030	regLM	61	-0.0300612	2.39039	2.86741	0.161648	2.39039	0.771954
gen_915	CCAGTAATGGGATGGCTGGGTCCAATGGTATTTCTAGTTCTAGATCCCTGAGGAATTGCCACACTGACTTCCACAATGGTTGAACTAGTTTACAGTCCCACCAACAGTGTAAAATTATTCCTATTTCTCCACATCCTCTCCAGCACCTGTTGTTTCCTGCCTTTTTTGTTTGTTTTTTTTTGTATATATATATATATATA	030	regLM	24	-0.315944	-0.0113855	-0.41478	0.0269891	-0.0113308	-0.173205
gen_916	CCATCTGTTCCATCCTCACCCACCCAAGGAGCCGCCCCTGCTCCTAGAGACTCTGGGCACCACTGATAAGGGTGGGTACCAGGAACTCCACCCTTTACCGAGAAAGGCAGGCTGGTTTATCGCCACTCAGACCCAGCCAGCAACCACCCTGGGGAGTGTGTCAGCCACCAGGAGCATCGCTGTTGGGGAAATGGTAGATA	030	regLM	84	0.427221	8.1312	0.73559	0.218624	8.13118	1.66373
gen_917	TCTCTGCTCCCCAGAGTCCCTGCACGTGGCTTGACAGTGGCCTTGGTAGGACCCACTGGGGTGTTTCTTCGTCGCCCATGGGCCCTCATGCTGTTATCAGTTGGAAATGAATCAGAGATTAGGAAGCGGGGGGAGTGGTGGGGGTGTTATCGCCCAGTGCACACGGGGCTCTCAGCTAGTCCACTGATATAAATGGCCAG	030	regLM	15	0.55657	5.60964	-0.294526	0.343427	5.60964	7.243035e-05
gen_918	CCAGTAATGGGATGGCTGGGTCCAATGGTATTTCTAGTTCTAGATCCCTGAGGAATCGCCACACTGACTTCCACAATGGTTGAACTAGTTTACAGTCCCGCCAACAGTGTAAAATTATTCCTATTTCTCCACATCCTCTCCAGCACCTGTTGTTTCCTGACTTTTTAATGATCACCATTCTAACTGGTGTGAGATGGTAT	030	regLM	3	-0.615585	-0.0115036	-0.559084	-0.231559	-0.0115446	-0.542594
gen_919	CAGAATTTTAAGCGGCTCAATTTACTTTCGTGTTATTTTTAATAACAATGACCATAGTAATGCCTTTTCCCCCTTAAAATGTACAGGCTTATTCAAATAAAATGAGAAATGCCAATGGAATATTATTCAGCAATAATGAAAAAAATAAAAAATGGGCCAGGCATAGTGGCTCATGCCTGTAATCCCAGCACTTTGGGAGG	030	regLM	99	-0.0895395	0.0221034	0.621634	-0.179334	0.0220806	0.0350668
gen_920	ATTAGCATGGAATTTGGACTTTGGAGCCATAATCCTGTTGTCTTCTTTCATTTAAAGAATATGGGCCGGGCGCAGTGGCTCACGCCTGTAATCCCAGCACTTTGGGAGGCCGAGGCGGGTGGATCACGAGGTCAGGAGATCGAGACCATCCTGGCTAACACAGTGAAACCCTGTCTCTACTAAAAATACAAAAAATTAGC	030	regLM	58	0.332273	3.17171	2.03673	1.31565	3.17179	2.74787
gen_921	TCTCTGCTCCCCAGAGTCCCTGCACGTGGCTTGACAGTGGCCTTGGTAGGACCCACTGGGGTGTTTCTTCGTCGCCCATGGGCCCTCATGCTGTTATCAGTTGGAAATGAATCAGAGATTAGGAAGCGGGGGGAGTGGTGGGGGTGGTATTGCGCCCTGGAGCAGGACTGAAACTGAAACTGGGTGGAGCCCACAGAGGC	030	regLM	28	3.08984	4.8674	3.55004	3.30237	4.86729	4.53421
gen_922	AGAATTGGAAGGAGCTTAGGGGAAAGCTAGCCTCAGGTCAGAATTGCCTGCATGCCACTCGGCTAGTGAGCTGCTGAATCACCTTATTCCTGGAGAAAGACTTTGATACTGAGAAAACTGACTTGCTCAGCTCTTGCTACAACTGTGACCATCTCTGCAACAGTAAAGTAAAAACAAATACCTCTCTTGTTGGGTAATAA	030	regLM	94	0.255804	1.09929	0.234711	0.107129	1.09931	0.480391
gen_923	ATTAGCATGGAATTTGGACTTTGGAGCCATAATCCTGTTGTCTTCTTTCATTTAAAGAATATGGGCCAGGCGCGGTGGCTCACGCCTGTAATCCCAGCACTTTGGGAGGCCGAGGCGGGCAGATCACGAGGTCAGGAGATCGAGACCATCCTGGCTAACACAGTGAAACCCTGTCTCTACTAAAAATACAAAAAATTAGC	030	regLM	56	0.251237	3.43231	2.20377	1.09814	3.43228	2.55703
gen_924	TCTCTGCTCCCCGGAGTCCCTGCACGTGGCTTGACAGTGGCCTTGGTAGGACCCACTGGGGTGTTTCTTCGTCGCCCATGGGCCCTCATGCTGTTATCAATTGGAAATGAATCAGAGATTAGGAAGCGGGGGGAGTGGTGGGGGTGTTATCGCCCAGTGCACACAGGTTACCACAGATGGAATGAGGGAATGTGGAAACA	030	regLM	22	0.344022	2.38299	-0.924024	0.122083	2.38274	-0.456075
gen_925	ATTAGCATGGAATTTGGACTTTGGAGCCATAATCCTGTTGTCTTCTTTCATTTAAAGAATATGGGCCGGGCGCGGTGGCTCACGCCTGTAATCCCAGCACTTTGGGAGGCCGAGGCGGGTGGATCATGAGGTCAGGAGATCGAGACCATCCTGGCTAACACAGTGAAACCCTGTCTCTACTAAAAATACAAAAAAATAGG	030	regLM	57	0.324526	3.14881	1.58395	1.12219	3.14883	1.73885
gen_926	ATTATGATACAGTCCAAGTATGTAACTTTCTGGGGACCAGACTTTGCTGAGAGTCATAATGGAGAGTCAAAGAGTCTGATGGCTGAGAGGGATGTGCCTAGGCTTGCCTTCATAAATGTTCATTGTCTCAGCCAAGGTTTTGGCAGGAGCGAGAGCAGGCTCAGATCAGTGTCACAGGGAGTATGTCACAGCGGGCAAGG	030	regLM	97	1.37227	-0.00692103	4.73935	1.10867	-0.00700252	1.77266
gen_927	GTTTAGCGTAAGAATCAGGGTCCAGCTGGTGCTCCCTAAACAGCAGCTGCTGTTCACTGTTGAAAGGCGCTCTGGAAGGCCAGGCGCGGTGGCTCATGCTTGTAATCCCAGCACTTTGGGAGGCCGAGGTGGGCGGATCACCTGAGGTAGGGAGTTCGAGACCAGCCTGACCAACGTGGAGAAACCCCATCTCTCCTAAA	030	regLM	63	0.149043	3.44876	3.92281	0.424716	3.44925	2.03894
gen_928	ATTCCATTTGATTCTCCATTCCATTCTTCTCCATTCAAATTCCCTAATCAATTCCATGCTCCATTACATTCCATTCTACACTACACTGCATTCCACATATCATTCCATTCTCAATTCACCATTCCATTCTCCCTTCCATTCCATTCCACTACACTCGACTCTCCATTCCATTCTCCACTCAATTCTCCATTACATTCCAT	030	regLM	90	-0.613398	-0.282431	3.35459	-0.251438	-0.282448	-0.793316
gen_929	AGAAAAAAACAAACAACCCCATCAACAAGTGGGTGAAGGATATGAACAGACACTTCTCAAAAGAAGATATTTATTCAACCAAAAGACACATGAAAAAATGCTCATCATCACTGGCCATCAGAGAAATGCAAATCAAAACCACAATGAGATACCATCTCACACCAGTTAGAATGGCGATCATTGAAAAGTCAGGAAGCAAC	030	regLM	44	-0.432731	1.25384	-0.0112914	-0.135975	1.25371	-0.360216
gen_930	CCTGAGAAAGGCTTCAACTAAAGAGCTATGGACAGGGACACTCTGTCACTTCCTGGGATTTTGACCCCCAGCTGTCCAACAGAGGAGGGTCTGTGCCTTTGCTCATTAGCCTAACTTAGATGATAGGTGACAAACTGAAGTGAGCTATGGGGAGAGGTACCTCATTTATCTGTTGCTGGGTGTGGCAGGGCCTCTGGGAG	030	regLM	25	0.232368	2.27505	-0.738638	-0.161699	2.27504	-0.713733
gen_931	AGAAAAAAACAAACAACCCCATCAACAAGTGGGTGAAGGATATGAACAGACACTTCTCAAAAGAAGATATTTATTCAACCAAAAGACACATGAAAAAATGCTCATCATCACTGGCCATCAGAGAAATGCAAATCAAAACCACAATGAGATACCATCTCACACCAGTTAGAATGGCGATCATTAAAAAGTCAGGAAACCAC	030	regLM	43	-0.489748	0.77516	-0.00839995	-0.188194	0.775689	-0.331298
gen_932	TCTCTGCTCCCCGGAGTCCCTGCACGTGGCTTGACAGTGGCCTTGGTAGGACCCACTGGGGTGTTTCTTCGTCGCCCATGGGCCCTCATGCTGTTATCAGTTGGAAATGAATCAGAGATTAGGAAGCGGGGGGAGTGGTGGGGGTGTTATCGCCCAGTGCACACAGGTTACCACAGAGGTCACACGGTAGGTGAGGGGAA	030	regLM	23	0.906551	4.80827	-1.02459	0.912447	4.8082	-0.557637
gen_933	CCTGAGAAAGGCTTCAACTAAAGAGCTATGGACAGGGACACTCTGTCACTTCCTGGGATTTTGACCCCCAGCTGTCCAACAGAGGAGGGTCTGTGCCTTCGCTCATTAGCCTAACTTAGATGATAGGTGACAAACTGAAATGAGCTATAGGGAGTTGTCCACTTCCAGGCTGCTATCACTGTCTCAGATGGGGCATTTCT	030	regLM	11	-0.0829924	0.71352	-0.440226	-0.175218	0.713534	-0.626846
gen_934	CCATCTGTTCCATCCTCACCCACCCAAGGAGCCGCCCCTGCTCCTAGAGACTCTGGGCACCACTGATAAGGGTGGGTACCAGGAACTCCACCCTTTACCAAGAAAGGCAGGCTGGTTTATCGCCACTCAGACCCAGCCAGCGACCACCCTGGGGAGTGTGTCAGCCACCAGGAGCATCGCTGTTGGGGAAATGTTATCTC	030	regLM	84	-0.134125	6.74649	0.252931	-0.101246	6.74645	1.07916
gen_935	CCATCTGTTCCATCCTCACCCACCCAAGGAGCCGCCCCTGCTCCTAGAGACTCTGGGCACCACTGATAAGGGTGGGTACCAGGAACTCCACCCTTTACCGAGAAAGGCAGGCTGGTTTATCGCCACTCAGACCCAGCCAGCAACCACCCTGGGGAGTGTGTCAGCCACCAGGAGCATCGCTGTTGGGGAAATGTTATCTT	030	regLM	84	0.475129	8.24565	0.762618	0.348001	8.2457	1.67768
gen_936	AGAATTGGAAGGAGCTTAGGGGAAAGCTAGCCTCAGGTCAGAATTGCCTGCATGCCACTCGGCTAGTGAGCTGCTGAATCACCTTATTCCTGGAGAAAGATTTTGTTTTTTATTTTATTTTATTTTATTTTATTTTATTTTATTTTACTTTATTATTATTATACTTTAAGTTCTAGGGTACATGTGCACAATGTGCAGGT	030	regLM	95	0.0275464	0.250766	0.444753	0.108247	0.250796	0.695264
gen_937	CCATCTGTTCCATCCTCACCCACCCAAGGAGCCGCCCCTGCTCCTAGAGACTCTGGGCACCACTGATAAGGGTGGGTACCAGGAACTCCACCCTTTACCGAGAAAGGCAGGCTGGTTTATCGCCACTCAGACCCAGCCAGCGACCACCCTGGGGAGTGTGTCAGCCACCAGGAGCATCGCTGTTGGGGAAATGGTAGATA	030	regLM	84	-0.0632185	7.30422	0.388609	-0.00670237	7.30427	1.16745
gen_938	ATTATGATACAGTCCAAGTATGTAACTTTCTGGGGACCAGACTTTGCTGAGAGTCATAATGGAGAGTCAAAGAGTCTGATGGCTGAGAGGGATGTGCCTGGGCTTGCCTTCATAAATGTTCATTGTCTCAGCCAAGGTTTTGGCAGGAGCGAGAGCAGGCTCAGATCAGTGTCACAGGCAGTACCTTACGTGACTTGGAT	030	regLM	95	2.40958	0.15363	6.42251	2.51456	0.153657	4.01433
gen_939	TCTCTGCTCCCCAGAGTCCCTGCACGTGGCTTGACAGTGGCCTTGGTAGGACCCACTGGGGTGTTTCTTCGTCGCCCATGGGCCCTCATGCTGTTATCAGTTGGAAATGAATCAGAGATTAGGAAGCGGGGGGAGTGGTGGGGGTGTTATCGCCCAGTGCACACAGGTTACCACAGAAGGAAGAGGCTGGGTTGGAAATG	030	regLM	23	1.1411	5.41344	-0.33952	0.660938	5.41347	0.0757303
gen_940	TCTCTGCTCCCCAGAGTCCCTGCACGTGGCTTGACAGTGGCCTTGGTAGGACCCACTGGGGTGTTTCTTCGTCGCCCATGGGCCCTCATGCTGTTATCAGTTGGAAATGAATCAGAGATTAGGAAGCGGGGGGAGTGGTGGGGGTGTTATCGCCCAGTGCACACAGGGTCCCATTCATTCCGCCATTAGACTGCTGCGTC	030	regLM	20	1.37933	5.41795	0.231394	1.06942	5.41794	0.620193
gen_941	TGCACCCCCCCATCATTTTCTTCATTTGTATAATGAGGCTAATACCATGTGTACAACACCGCCGAAATGTACTGGCAGCTCCATATTTCCTTCTCTTATCTCATATTCATCTTTCCACATCTCCCATGAGAGTTTCTCAAGCTGATTAAATTCCTATCCAACATATGTCAGATACATAATTTCAGGATAAGGACATGGCC	030	regLM	95	-0.191282	0.234366	0.954261	-0.0959216	0.234427	-0.489083
gen_942	CCAGTAATGGGATGGCTGGGTCCAATGGTATTTCTAGTTCTAGATCCCTGAGGAATTGCCACACTGACTTCCACAATGGTTGAACTAGTTTACAGTCCCGCCAACAGTGTAAAATTATTCCTATTTCTCCACATCCTCTCCAGCACCTGTTGTTTCCTGCCTTTTTTGTTTGTTTTTTTTTGTATATATATATATATATA	030	regLM	24	-0.241708	0.207747	-0.392972	-0.00630427	0.207752	-0.0870343
gen_943	ATTATGATACAGTCCAAGTATGTAACTTTCTGGGGACCAGACTTTGCTGAGAGTCATAATGGAGAGTCAAAGAGTCTGATGGCTGAGAGGGATGTGCCTGGGCTTGCCTTCATAAATGTTCATTGTCTCAGCCAAGGTTTTGGCAGGAGCGAGAGCAGGCTCAGATCAGTGTCACAGGCAGTACCTTACGTGCCTTGGCC	030	regLM	95	2.32194	0.0186028	6.36779	2.46408	0.0186292	3.75411
gen_944	CCTGAGAAAGGCTTCAACTAAAGAGCTATGGACAGGGACACTCTGTCACTTCCTGGGATTTTGACCCCCAGCTGTCCAACAGAGGAGGGTCTGTGCCTTCGCTCATTAGCCTAACTTAGATGATAGGTGACAAACTGAAGTGAGCTATGGGGAGAGGTACCTCATTTATCTGTTGCTGGGTGTGTCACAGCAGGCCATGC	030	regLM	26	0.20625	1.95878	-0.558746	-0.123384	1.95889	-0.726341
gen_945	TGCACCCCCCCATCATTTTCTTCATTTGTATAATGAGGCTAATACCATGTGTACAACACCGCCGAAATGTACTGGCAGCTCCATATTTCCTTCTCTTATCTCATATTCATCTTTCCACATCTCCCATGAGAGTTTCTCAAGCTGATTAAATTCCTATCCAACATATGTCAGATACATAATTTCAAAAAAAGGCAAAAATC	030	regLM	98	-0.156878	0.0435427	1.48723	-0.0128852	0.0435677	-0.445358
gen_946	GTTTAGCGTAAGAATCAGGGTCCAGCTGGTGCTCCCTAAACAGCAGCTGCTGTTCACTGTTGAAAGGCGCTCTGGAAGGCCAGGCGCGGTGGCTCATGCTTGTAATCCCAGCACTGTGGGAGGCCGAGGTGGGCGGATCACCTGAGGTAAGGAGTTCAAGACCAGCCTGACCAACGTGGAGAAACCCCATCTCTCCTAAA	030	regLM	62	0.319512	2.68404	3.70122	0.652103	2.68407	1.63898
gen_947	TCCTGAATGGGCAAAAACTGGAAGCATTCCCTTTGAAAACTGGCACAAGACAGGGATGCCCTCTCTCACCGCTCCTATTCAACATAGTGTTGGAAGTTCTGGCCAGGGCAATCAGGCAGGAGAAATAAATAAAGGGTATTCAATTAGGAAAAGAGGAAGTCAAATTGTCCCTGTTTGCAGATGACATGACTGTATATTTA	030	regLM	20	-0.103447	0.217459	-0.44605	0.341188	0.217498	-0.0952153
gen_948	CCATCTGTTCCATCCTCACCCACCCAAGGAGCCGCCCCTGCTCCTAGAGACTCTGGGCACCACTGATAAGGGTGGGTACCAGGAACTCCACCCTTTACCGAGAAAGGCAGGCTGGTTTATCGCCACTCAGACCCAGCCAGCGACCACCCTGGGGAGTGTGTCAGCCACCAGGAGCATCGCTGTTGGGGAGTGGTGACTCC	030	regLM	84	-0.014347	7.39379	0.601133	0.0345222	7.39374	1.29286
gen_949	ATTAGCATGGAATTTGGACTTTGGAGCCATAATCCTGTTGTCTTCTTTCATTTAAAGAATATGGGCCAGGCGCGGTGGCTCACACCTGTAATCCCAGCACTTTGGGAGGCCGAGGCGGGTGGATCATGAGGTCAGGAGATCGAGACCATCCTGGCTAACACAGTGAAACCCTGTCTCTACTAAAAATACAAAAAAATTAG	030	regLM	59	0.0523679	2.72845	0.666007	0.712215	2.72871	0.828303
gen_950	GATGGGTGCCTCTCCATGGAGCTCACATGTCATACTGCGCCCTGACTCATCACATGTCATTGTTCCTTTGTATTAATTTTCTGTCATCTACAGTGAGTTCCTTGAGGGCAGGGAAAGGGCTTTTTATCTCTGCATTACCAGAGCCCAACAGATACACACTGGTTCTTATCCATCCACTCATTCATTCATTCATTCTTTTC	030	regLM	10	-0.0400083	5.21551	-0.161071	0.310015	5.2156	0.175271
gen_951	TCTCTGCTCCCCAGAGTCCCTGCACGTGGCTTGACAGTGGCCTTGGTAGGACCCACTGGGGTGTTTCTTCGTCGCCCATGGGCCCTCATGCTGTTATCAATTGGAAATGAATCAGAGATTAGGAAGCGGGGGGAGTGGTGGGGGTGTTATCGCCCAGTGCACACAGGGTCCCATTCATTCATTCATTCATTCATTCATTC	030	regLM	20	0.058	1.20356	-0.985601	-0.161198	1.20331	-0.219678
gen_952	ATTAGCATGGAATTTGGACTTTGGAGCCATAATCCTGTTGTCTTCTTTCATTTAAAGAATATGGGCCGGGCGCGGTGGCTCACGCCTGTAATCCCAGCACTTTGGGAGGCCGAGGCAGGTGGATCACGAGGTCAGGAGATCGAGACCATCCTGGCTAACACGGTGAAAGCCTGTCTCTACTAAAAATACAAAAAAATTAG	030	regLM	58	0.161522	3.05611	1.5166	1.04723	3.056	2.18317
gen_953	GATGACAAGTGCCCAAGGTGGTCAGAGCACAACTTGGTTTTATACATTTTAGGGAGACATGAGACATCAATCAATATATGTAAGATGAACATTGGTTCCGTCTGGAAAGGCGGGATAACTCGAAGCAAAGGCGGGACAACTCGAAGCAAAGGCGGGACAACTCGAAGCAAAGGCGGGACAACTGGAAGTTGGGAAGGGGC	030	regLM	101	0.93507	2.33497	1.17287	1.25625	2.33475	1.61571
gen_954	CCTAGAGACTCTGGGCACCACTGATAAGGGTGGGTACCAGGAACTCCACCCTTTACCGAGAAAGGCAGGCTGGTTTATCGCCACTCAGACCCAGCCAGCAACCACCCTGGGGAGTGTGTCAGCCACCAGGAGCATCGCTGTTGGGGAAATGTTATTAACTAGGAAGGAATTTTCCAAATATTGTTTCTCCACTATAGCAC	030	regLM	14	0.0926263	6.81772	0.569679	0.400468	6.81768	1.71997
gen_955	GAGAAATTCTCAAGGAGGAGGACACAAACAGGACTGGAAGGGGAGCAGGACTGAGCCAAGCGGATGAGAGGAAAGAGGCATTCCAGTCCTCTGGGGAAGCATGGGAGGTAGGAATTCTTGCCATCAGTGGTTTGGACAAACACACAGAGTGGGTCACCGGGTCAGAGCCGAGGGTTAGGACGGGAGAGGAGCAAAGGTCA	030	regLM	96	2.89907	0.662408	-0.0161688	1.61482	0.662413	0.224986
gen_956	ATTATGATACAGTCCAAGTATGTAACTTTCTGGGGACCAGACTTTGCTGAGAGTCATAATGGAGAGTCAAAGAGTCTGATGGCTGAGAGGGATGTGCCTGGGCTTGCCTTCATAAATGTTCATTGTCTCAGCCAAGGTTTTGGCAGGAGCGAGAGCAGGCTCAGATCAGTGTCACATGGAAGTTGGGCTTAAAGTGAATG	030	regLM	95	2.22611	0.202361	5.92369	2.29423	0.202382	4.26505
gen_957	GATTTTTCTACTGCTAGGTTTTCCTTTTGGGGTTACGATTATTACAGGTGGCAATCAGTTAACTTAGTGGTTCTGTAGGCACCGCCCTATCTTCCAACTCACTTACATTTAAAAATTCACACAGAGAGGCTAGTGGGAAGCGGGTAGGTGTAAACAATGTGCTACAGTGAGAAACCTGGGGCGTTTGTAAAGCTTTTATA	030	regLM	99	0.557647	1.52917	0.395733	0.276809	1.52892	0.255608
gen_958	CTCAGAATTAATGGAGAGGGCCAGTGGCGGCCTGTGCCCTTTGTCCCACCGGCCGGCCTGGGGGTGGCGGCTCCAGAATACAGGGTCCTATTGTGTGCCCTGATGTCAGGCAGCTGGACTGCTGGGAGTGAGGATAAACAAGCAGCTGGAGCATCTCGCCTGAAGCCCCAGGAGAGGGCCAGAGCCCCTGCAGCAGCGGC	030	regLM	97	2.96388	0.000568972	1.24419	2.12709	0.000599045	1.19439
gen_959	CCTGAGAAAGGCTTCAACTAAAGAGCTATGGACAGGGACACTCTGTCACTTCCTGGGATTTTGACCCCCAGCTGTCCAACAGAGGAGGGTCTGTGCCTTCGCTCATTAGCCTAACTTAGATGATAGGTGACAAACTGAAGTGAGCTATGGGGAGAGGTACCTCCCATTCCTCTCTGGGCCTGAATTTCCCTTTGTCAGCA	030	regLM	27	0.867265	1.58922	0.477791	0.192472	1.58914	0.0257817
gen_960	CCTGAGAAAGGCTTCAACTAAAGAGCTATGGACAGGGACACTCTGTCACTTCCTGGGATTTTGACCCCCAGCTGTCCAACAGAGGAGGGTCTGTGCCTTTGCTCATTAGCCTAACTTAGATGATAGGTGACAAACTGAAATGAGCTATAGGGAGTTGTCCACTTCCAGGCTGCTATCAGTGGGTCACAGCTTTGATCTTG	030	regLM	13	-0.112982	4.44526	-0.954079	-0.191109	4.44527	-0.938944
gen_961	TCTCTGCTCCCCAGAGTCCCTGCACGTGGCTTGACAGTGGCCTTGGTAGGACCCACTGGGGTGTTTCTTCGTCGCCCATGGGCCCTCATGCTGTTATCAGTTGGAAATGAATCAGAGATTAGGAAGCGGGGGGAGTGGTGGGGGTGTTATCGCCCAGTGCACACAGGGTCCCATTCATTCATTCATTCATTCCTCCATTC	030	regLM	20	0.246715	3.9681	-0.828812	-0.0701012	3.96827	-0.28781
gen_962	CCTGAGAAAGGCTTCAACTAAAGAGCTATGGACAGGGACACTCTGTCACTTCCTGGGATTTTGACCCCCAGCTGTCCAACAGAGGAGGGTCTGTGCCTTCGCTCATTAGCCTAACTTAGATGATAGGTGACAAACTGAAGTGAGCTATAGGGAGTTGTCCACTTCCAGGCTGCTATCACTACAGCCCATCTGGAAGCTGA	030	regLM	11	-0.0523055	4.5055	-0.724264	-0.183324	4.50555	-0.717017
gen_963	AGAATTGGAAGGAGCTTAGGGGAAAGCTAGCCTCAGGTCAGAATTGCCTGCATGCCACTCGGCTGGCTAGTGAGCTGCTGAATCACCTTATTCCTGGAGAAAGACTTTGATACTGAGAAAACTGACTTGCTCAGCTCTTGCTACAACTGTGACCATCTCTGCAACAGTTTTATCTTTGGAATCTTTTTAGCACTGACTAA	030	regLM	94	0.186571	1.68801	0.642027	0.165007	1.68805	0.71465
gen_964	TCTCTGCTCCCCGGAGTCCCTGCACGTGGCTTGACAGTGGCCTTGGTAGGACCCACTGGGGTGTTTCTTCGTCGCCCATGGGCCCTCATGCTGTTATCAGTTGGAAATGAATCAGAGATTAGGAAGCGGGGGGAGTGGTGGGGGTGTTATCGCCCAGTGCACACGGGGCTCTCAGCTAATCTCTGGCGGCCCGGGGCAAT	030	regLM	6	0.702481	5.53644	-0.0704512	0.754502	5.53645	0.171954
gen_965	GTTTAGCGTAAGAATCAGGGTCCAGCTGGTGCTCCCTAAACAGCAGCTGCTGTTCACTGTTGAAAGGCGCTCTGGAAGGCCAGGTGCGGTGGCTCATGCTTGTAGTCCCAGCACTGTGGGAGGCCGAGGTGGGCGGATCACCTGAGGTAAGGAGTTCGAGACCAGCCTGACCAACGTGGAGAAACCCCATCTCTCCTAAA	030	regLM	63	0.092838	2.45861	3.27127	0.286315	2.4586	0.925734
gen_966	CCTGAGAAAGGCTTCAACTAAAGAGCTATGGACAGGGACACTCTGTCACTTCCTGGGATTTTGACCCCCAGCTGTCCAACAGAGGAGGGTCTGTGCCTTTGCTCATTAGCCTAACTTAGATGATAGGTGACAAACTGAAATGAGCTATAAGAACTGGTTTTTTAAAAAGGATGTTCAGTTTATTCTAGGATGGAATGACG	030	regLM	28	0.179145	0.0705831	0.199378	-0.156993	0.0705708	-0.11022
gen_967	GAAAGGATACTCTGGCTGTCATGTGGACTGGAGGGAGCTGGAATTGAGGCAGTGAGCCCAGCTACCAGAGTCTTGAAATAGTTTAGTGTAAGATGCTGAGTCATGAGTTGGGGCAGAGAGGATAACAAAGTAGGGAAGTGGGGGTAGAGACAGTCGTAAGACCTGAGGAGGGAATGGCTAAGTGAGGGTTGAAGGAGGAG	030	regLM	94	1.43733	5.58501	2.64871	1.05652	5.58505	3.08094
gen_968	CATGAGGAGCGTTTGTAGCAGTCACTGAATCACCTCATGACTAGCGGGGCAAGCCTCTAATTCACCGCAGGATTTCCGGTAGGTTGGATTGTGGGGTTGGTGTTTGCACTCCAAAGAGTTGCTGTGATTTCCCTGTATCTGTCTTTCTGGCTTGTTAGATCTTCTCATTTGGCGTCCTTTCTCCGAAGAGTTTCTCTGAT	030	regLM	100	1.57083	0.497945	3.8061	1.62858	0.497919	1.73388
gen_969	CTGTTTGTGCTGTGTGTTTCCAATAATTGACAACATATGTGATTTTGTTATTCTACACTGAGCTTGCTTCGTCTGCATATTCATTAAAAAAGAATTTTTAAAATCTTTGTCAGATGTTCTACATCTGAATCATCTTCTAGTATTAAACCACAGCCAAGAACTTTTATATCTTTTATCACATTAATATAAAGATTCATAGA	030	regLM	95	-0.309965	-0.775322	3.32042	0.348045	-0.775349	1.58436
gen_970	TCTCTGCTCCCCGGAGTCCCTGCACGTGGCTTGACAGTGGCCTTGGTAGGACCCACTGGGGTGTTTCTTCGTCGCCCATGGGCCCTCATGCTGTTATCAGTTGGAAATGAATCAGAGATTAGGAAGCGGGGGGAGTGGTGGGGGTGTTATCGCCCAGTGCACACGGGGCTCTCAGCTAATCTCTGGCGGCCCTGGGTAAT	030	regLM	4	0.739648	5.6647	-0.198322	0.751545	5.6647	0.0828085
gen_971	ATTAGCATGGAATTTGGACTTTGGAGCCATAATCCTGTTGTCTTCTTTCATTTAAAGAATATGGGCCGGGCGCGGTGGCTCACACCTGTAATCCCAGCACTTTGGGAGGCCGAGGCGGGTGGATCACGAGGTCAGGAGATCGAGACCATCCTGGCTAACACAGTGAAACCCTGTCTCTACTAAAAATACAAAAAATTAGC	030	regLM	58	0.116212	2.99475	1.03441	0.889977	2.99463	1.45408
gen_972	GTTTAGCGTAAGAATCAGGGTCCAGCTGGTGCTCCCTAAACAGCAGCTGCTGTTCACTGTTGAAAGGCGCTCTGGAAGGCCAGGTGCGGTGGCTCATGCTTGTAATCCCAGCACTGTGGGAGGCCGAGGTGGGCGGATCACCTGAGGTAAGGAGTTCGAGACCAGCCTGGCCAACATGGTGAAACCCCATCTCTCCTAAA	030	regLM	59	0.0525366	2.23315	2.83239	0.313785	2.23327	0.742729
gen_973	CTCAGAATTAATGGAGAGGGCCAGTGGCGGCCTGTGCCCTTTGTCCCACCGGCCGGCCTGGGGGTGGCGGCTCCAGAATACAGGGTCCTATTGTGTGCCCTGATGTCAGGCAGCTGGACTGCTGGGAGTGAGGATAAACAAGCAGCTGGAGCATCTCGCCTGAAGCCCCAGGAGAGGGCCAGAGCCCCAGCCTCAGCCCC	030	regLM	99	2.77223	0.0569406	1.27332	2.1319	0.0569897	1.13874
gen_974	ATTAGCATGGAATTTGGACTTTGGAGCCATAATCCTGTTGTCTTCTTTCATTTAAAGAATATGGGCCAGGCGCGGTGGCTCACGCCTGTAATCCCAGCACTTTGGGAGGCCGAGGTGGGTGGATCATGAGGTCAGGAGATCGAGACCATCCTGGCTAACACAGTGAAACCCTGTCTCTACTAAAAATACAAAAAAATTAG	030	regLM	57	0.205053	2.98051	1.48513	0.910726	2.98042	1.4946
gen_975	CTGGCTGTTTCCTGACTTTTTAATGATCGCCATTCTAACTGGTGGGAGATGGTATCTCATTGTGGTTTTGATTTGCATTTCTCTGATGGCCAGTGATGATGAGCATTTTTTCATGTGTCTCTTGGCTGCATAAATGTCTTCTTTTGAGAAGTGTCTGTTCATATCCTTTGCCCACTTTTTGATGGGGTTGTTTGATTTTA	030	regLM	18	-0.304142	-0.0445274	0.0723849	-0.0843635	-0.0454255	-0.335582
gen_976	TCTCTGCTCCCCAGAGTCCCTGCACGTGGCTTGACAGTGGCCTTGGTAGGACCCACTGGGGTGTTTCTTCGTCGCCCATGGGCCCTCATGCTGTTATCAGTTGGAAATGAATCAGAGATTAGGAAGCGGGGGGAGTGGTGGGGGTGGTATTGCGCCCTGGAGAAGCATCTTGGCAACAGAATTATAAGAGGCTGGGCGAG	030	regLM	27	0.439819	1.66512	0.0476361	0.137215	1.66519	0.317942
gen_977	GAAAGGATACTCTGGCTGTCATGTGGACTGGAGGGAGCTGGAATTGAGGCAGTGAGCCCAGCTACCAGAGTCTTGAAATAGTTTAGTGTAAGATGCTGAATCATGAGTTGGGGCAGAGAGGATAACAAAGTGGGGAAGTGGGGGTAGAGACAGTCGTAAGACCTGAGGAGGAAATGGCTAAGTGAGGGTTGAAGGAGGAA	030	regLM	94	0.387801	3.21363	0.956873	0.543625	3.21349	1.28271
gen_978	ATTAGCATGGAATTTGGACTTTGGAGCCATAATCCTGTTGTCTTCTTTCATTTAAAGAATATGGGCCGGGCGCGGTGACTCACATCTCTAATCCCAGCACTTTGGGAGGCCAAGGCGGGTAGATCACGTGAGGTCAGGAGTTTGAGAGGCCAGCCTGGCAACATGGCAAAACCCTGTCTCTACTAAAAATACAAAAATTA	030	regLM	64	4.28696	0.445433	1.63564	2.96219	0.445411	2.32966
gen_979	CCTGAGAAAGGCTTCAACTAAAGAGCTATGGACAGGGACACTCTGTCACTTCCTGGGATTTTGACCCCCAGCTGTCCAACAGAGGAGGGTCTGTGCCTTTGCTCATTAGCCTAACTTAGATGATAGGTGACAAACTGAAGTGAGCTATAGGGAGTTGTCCACTTCCAGGCTGTTATCCTTAAACCACCTCAGCCTTTGCG	030	regLM	12	-0.0397944	0.549145	-0.538164	-0.16171	0.549117	-0.808629
gen_980	CCAGTAATGGGATGGCTGGGTCCAATGGTATTTCTAGTTCTAGATCCCTGAGGAATTGCCACACTGACTTCCACAATGGTTGAACTAGTTTACAGTCCCACCAACAGTGTGTAAGTGTTCCTATTTCTCCACATCCTCTCCAGCACCTGTTGTTTCCTGACTTTTTAATGATCGCCATTCTAACTGGTGTGAGATGGTAT	030	regLM	9	-0.469006	0.849761	-0.502169	-0.0671279	0.849882	-0.512425
gen_981	ATTATGATACAGTCCAAGTATGTAACTTTCTGGGGACCAGACTTTGCTGAGAGTCATAATGGAGAGTCAAAGAGTCTGATGGCTGAGAGGGATGTGCCTGGGCTTGCCTTCATAAATGTTCATTGTCTCAGCCAAGGTTTTGGCAGGAGCGAGAACAGCCTCTGGTAGGAGCTGGGGTCACAGGAGGCAATGTCAGGTAA	030	regLM	96	2.07678	-0.0414296	5.79903	2.59056	-0.0414506	4.03897
gen_982	CAGAATTTTAAGCGGCTCAATTTACTTTCGTGTTATTTTTAATAACAATGACCATAGTAATGCCTTTTCCCCCTTAAAATGTACAGGCTTATTCAAATAAAATTAGAAATGCCAATGGAATATACTCATCTGGGAAATTACATTTTAACGTCATAGCCAAGGAAAAATTGGAGCTGTATTTTGAAGTCAAAAGTACTTAT	030	regLM	94	0.344735	0.213525	2.77238	0.19892	0.21353	0.519418
gen_983	GTTTAGCGTAAGAATCAGGGTCCAGCTGGTGCTCCCTAAACAGCAGCTGCTGTTCACTGTTGAAAGGCGCTCTGGAAGGCCAGGCGCGGTGGCTCATGCTTGTAATCCCAGCACTGTGGGAGGCCGAGGTGGGCGGATCACCTGAGGTAAGGAGTTCGAGACCAGCCTGACCAACGTGGAGAAACCCCATCTCTCCTAGA	030	regLM	63	0.316896	2.96207	3.98573	0.586093	2.96209	1.79894
gen_984	CCTCAGAATTAATGGAGAGGGCCAGTGGCGGCCTGTGCCCTTTGTCCCACCGGCCGGCCTGGGGGTGGCGGCTCCAGAATACAGGGTCCTATTGTGTGCCCTGATGTCAGGCAGCTGGACTGCTGGGAGTGAGGATAAACAAGCAGCTGGAGCATCTCGCCTGAAGCCCCAGGAGAGGGCCAGAGCCCCTGCTGCAGGAG	030	regLM	98	3.08194	0.0281212	1.38084	2.27505	0.028065	1.40057
gen_985	TCTCTGCTCCCCAGAGTCCCTGCACGTGGCTTGACAGTGGCCTTGGTAGGACCCACTGGGGTGTTTCTTCGTCGCCCATGGGCCCTCATGCTGTTATCAATTGGAAATGAATCAGAGATTAGGAAGCGGGGGGAGTGGTGGGGGTGTTATCGCCCAGTGCACACAGGTTACCACAGACGTTGAACCACTTTCCTGAGGAT	030	regLM	22	0.144658	4.62796	-0.910892	0.0332219	4.62801	-0.515347
gen_986	CCTGAGAAAGGCTTCAACTAAAGAGCTATGGACAGGGACACTCTGTCACTTCCTGGGATTTTGACCCCCAGCTGTCCAACAGAGGAGGGTCTGTGCCTTCGCTCATTAGCCTAACTTAGATGATAGGTGACAAACTGAAATGAGCTATAGGGAGTTGTCCACTTCCAGGCTGCTATCAGTGTTACAGGGGGCAAAGTGCC	030	regLM	12	0.202281	1.06647	-0.770519	-0.0469922	1.06644	-0.86134
gen_987	CCAGTAATGGGATGGCTGGGTCCAATGGTATTTCTAGTTCTAGATCCCTGAGGAATTGCCATACTGACTTCCACAATGGTTGAACTAGTTTACAGTCCCACCAACAGTGTAAAATTATTCCTATTTCTCCACATCCTCTCCAGCACCTGTTGTTTCCTGACTTTTTAATGATTGCCATTCTAACTGGTGTGAGATGGTAT	030	regLM	7	-0.679821	-0.144825	-0.516519	-0.308003	-0.144837	-0.596434
gen_988	CCTGAGAAAGGCTTCAACTAAAGAGCTATGGACAGGGACACTCTGTCACTTCCTGGGATTTTGACCCCCAGCTGTCCAACAGAGGAGGGTCTGTGCCTTCGCTCATTAGCCTAACTTAGATGATAGGTGACAAACTGAAGTGAGCTATGGGGAGAGGTACCTCATTTATCAGTTGAAGTGACAGCTGAATTATGTGGTAA	030	regLM	25	-0.382773	1.50212	-0.876495	-0.290961	1.50207	-0.952501
gen_989	CCATCTGTTCCATCCTCACCCACCCAAGGAGCCGCCCCTGCTCCTAGAGACTCTGGGCACCACTGATAAGGGTGGGTACCAGGAACTCCACCCTTTACCGAGAAAGGCAGGCTGGTTTATCGCCACTCAGACCCAGCCAGCGACCACCCTGGGGAGTGTGTCAGCCACCAGGAGCATCGCTGTTGGGGAAATGTTAGAAA	030	regLM	84	-0.0379353	7.38547	0.384555	0.0174262	7.38545	1.23639
gen_990	TCTCTGCTCCCCGGAGTCCCTGCACGTGGCTTGACAGTGGCCTTGGTAGGACCCACTGGGGTGTTTCTTCGTCGCCCATGGGCCCTCATGCTGTTATCAGTTGGAAATGAATCAGAGATTAGGAAGCGGGGGGAGTGGTGGGGGTGTTATCGCCCAGTGCACACAGGTTACCACAGACATTTAGCCCTCACTGCAGGGCC	030	regLM	22	0.901611	5.08289	-0.393119	0.534758	5.08296	-0.143871
gen_991	CTCAGAATTAATGGAGAGGGCCAGTGGCGGCCTGTGCCCTTTGTCCCACTGGCCGGCCTGGGGGTGGCGGCTCCAGAATACAGGGTCCTATTGTGTGCCCTGATGTCAGGCAGCTGGACTGCTGGGAGTGAGGATAAACAAGCAGCTGGAGCATCTCGCCTGAAGCCCCAGGAGAGGGCCAGAGCCCCTGCAGCAGCAGA	030	regLM	96	2.92466	0.0485815	1.38466	2.24939	0.048642	1.24863
gen_992	CATTCCATTCCATTCCATTCTGCATTCTGTTCCATTCTCCATTCCATTCCATTCTCCATACCATCCTCCATTCCATTACACTGCATTCCATTCTCCATTATATTTTATTCACCACGGCATTCCATTACATTTTCCATTCCATTCTCCATTCCATTCCATTCTCCATTCCATTCCATATTCTATTCTCCATTCCATTCCAT	030	regLM	89	-0.818176	-0.394471	3.56191	-0.383758	-0.394469	-0.771152
gen_993	TCTCTGCTCCCCAGAGTCCCTGCACGTGGCTTGACAGTGGCCTTGGTAGGACCCACTGGGGTGTTTCTTCGTCGCCCATGGGCCCTCATGCTGTTATCAGTTGGAAATGAATCAGAGATTAGGAAGCGGGGGGAGTGGTGGGGGTGTTATCGCCCAGTGCACACGGGGCTCTCAGCTAATCTCTGGCGGCCCTGGGTTGG	030	regLM	2	0.76076	5.79684	-0.187617	0.92472	5.79685	0.134325
gen_994	GTTTAGCGTAAGAATCAGGGTCCAGCTGGTGCTCCCTAAACAGCAGCTGCTGTTCACTGTTGAAAGGCGCTCTGGAAGGCCAGGTGCGGTGGCTCATGCTTGTAATCCCAGCACTGTGGGAGGCCGAGGTGGGCGGATCATGAGGTCAGGAGATCGAGACCATCCTGGCCAAAATGGTGAAACCCCATCTCTACTAAAAA	030	regLM	65	0.187823	1.88983	1.76528	0.560457	1.88991	0.682294
gen_995	GTTTAGCGTAAGAATCAGGGTCCAGCTGGTGCTCCCTAAACAGCAGCTGCTGTTCACTGTTGAAAGGCGCTCTGGAAGGCCAGGCGCGGTGGCTCATGCTTGTAATCCCAGCACTGTGGGAGGCCGAGGTGGGCGGATCACCTGAGGTAAGGAGTTCGAGATCAGCCTGACCAACGTGGAGAAACCCCATCTCTCCTAAA	030	regLM	64	0.44263	2.62295	3.31659	0.728819	2.62295	1.16041
gen_996	TCTCTGCTCCCCAGAGTCCCTGCACGTGGCTTGACAGTGGCCTTGGTAGGACCCACTGGGGTGTTTCTTCGTCGCCCATGGGCCCTCATGCTGTTATCAATTGGAAATGAATCAGAGATTAGGAAGCGGGGGGAGTGGTGGGGGTGTTATCGCCCAGTGCACACAGGTTACCACAGATGGAATAATGCAGGGAAGCAGGG	030	regLM	22	0.0584994	3.55245	-0.738345	0.016269	3.55219	-0.505336
gen_997	CCAGTAATGGGATAGCTGGGTCAAATGGTATTTCTAGTTCTAGATCCCTGAGGAATCGCCACACTGACTTCCACAATGGTTGAACTAGTTTACAGTCCCACCAACAGTGTAAAATTATTCCTATTTCTCCACATCCTCTCCAGCACCTGTTGTTTCCTGCCTTTTTAATGATCACCATTCTAACTGGTGTGAGATGGTAT	030	regLM	2	-0.578276	0.0514602	-0.500488	-0.143557	0.0514791	-0.46083
gen_998	CCAGTAATGGGATGGCTGGGTCCAATGGTATTTCTAGTTCTAGATCCCTGAGGAATCGCCACACTGACTTCCACAATGGTTGAACTAGTTTACAGTCCCACCAACAGTGTAAAATTATTCCTATTTCTCCACATCCTCTCCAGCACCTGTTGTTTCCTGACTTTTTAATGATCGCTATTCTAACTGGTGTGAGATGGTAT	030	regLM	5	-0.599165	0.0140548	-0.494685	-0.240066	0.0140774	-0.514829
gen_999	ATATTGGTACAGCACATTTGTCGCTATTAATAAACCAGTATCCAGGGCCAGGTGCAGTGGCTCACGCCTGTAATCCCAGCACTTTGGGAGGCCGAGACAGGTGGATCACCTGAGGTCAGGAGTTCGAGACCAGCCTGACCAACATGGGAAAACCCTGTCTCTACTAAAAATACAAAATTAGCTGGGCTTGGTGGTGCATG	030	regLM	47	-0.329433	2.69086	3.05164	-0.211638	2.69293	0.125799
gen_1000	CTAGCTGTACCAGCCGCTGCCCCGGACCTGCTGCCCTGCCCCACGCACCCCCCCTCCCCTGGCCAGCCTCCCCAGAGGCCAGAAGGCGCCTTATCGGGCAGGGTTAAGGAGGGGGACAGTTATCAGGGGCTGCAGCCTAGGTTGGGCCACAATGTCCTCGTCTCTTGAGGGTGGCAGGCTGTGCAGGCTCCCTGACCACC	030	regLM	10	0.300159	4.46132	0.397748	0.165046	4.46149	0.48629
gen_1001	TCTCTGCTCCCCGGAGTCCCTGCACGTGGCTTGACAGTGGCCTTGGTAGGACCCACTGGGGTGTTTCTTCGTCGCCCATGGGCCCTCATGCTGTTATCAATTGGAAATGAATCAGAGATTAGGAAGCGGGGGGAGTGGTGGGGGTGTTATCGCCCAGTGCACACAGGTTACCACAGACATTTAGCCCTCGAGGGGGCAGG	030	regLM	21	0.320772	4.67968	-0.484281	0.0971028	4.67972	-0.299434
gen_1002	ATTAGCATGGAATTTGGACTTTGGAGCCATAATCCTGTTGTCTTCTTTCATTTAAAGAATATGGGCCAGGCGCGGTGGCTCACGCCTGTAATCCCAGCACTTTGGGAGGCCGAGGCGGGCAGATCACGAGGTCAGGAGATCGAGACCATCCTGGCTAACACAGTGAAACCCTGTCTCTACTAAAAATACAAAAAAATTAG	030	regLM	56	0.272429	3.4117	2.07409	1.1224	3.41163	2.52651
gen_1003	CCAGTAATGGGATGGCTGGGTCCAATGGTATTTCTAGTTCTAGATCCCTGAGGAATTGCCACACTGACTTCCACAATGGTTGAACTAGTTTACAGTCCCGCCAACAGTGTAAAATTATTCCTATTTCTCCACATCCTCTCCAGCACCTGTTGTTTCCTGCCTTTTTTTGTCTCTACTTTGACGGGCAGGCAGTGGGAGGT	030	regLM	20	-0.182875	0.638898	-0.331622	0.454202	0.638755	-0.0814925
gen_1004	TCTCTGCTCCCCAGAGTCCCTGCACGTGGCTTGACAGTGGCCTTGGTAGGACCCACTGGGGTGTTTCTTCGTCGCCCATGGGCCCTCATGCTGTTATCAGTTGGAAATGAATCAGAGATTAGGAAGCGGGGGGAGTGGTGGGGGTGTTATCGCCCAGTGCACACGGGGCTCTCAGCTAATCTCTGGCGGCTCTGGAATAA	030	regLM	6	0.643133	5.58155	-0.201829	0.418057	5.58154	0.0327457
gen_1005	TCTCTGCTCCCCAGAGTCCCTGCACGTGGCTTGACAGTGGCCTTGGTAGGACCCACTGGGGTGTTTCTTCGTCGCCCATGGGCCCTCATGCTGTTATCAGTTGGAAATGAATCAGAGATTAGGAAGCGGGGGGAGTGGTGGGGGTGTTATCGCCCAGTGCACACGGGGCTCTCAGCTAATCTCTGGCGGCCCTGCGTGGT	030	regLM	5	0.731772	5.8975	-0.156512	1.00543	5.89753	0.153062
gen_1006	GATTTTTCTACTGCTAGGTTTTCCTTTTGGGGTTACGATTATTACAGGTGGCAATCAGTTAACTTAGTGGTTCTGTAGGCACCGCCCTATCTTCCAACTCACTTACATTTAAAAATTCACACAGAGAGGCTAGTGGGAAGCGGGTAGGTGTAAACAATGTGCTACAGTGAGAAACCTGGGGTCTTTCCAGGAACTCACAG	030	regLM	100	0.674991	2.38037	0.283282	0.326205	2.38027	0.358584
gen_1007	CTCAGAATTAATGGAGAGGGCCAGTGGCGGCCTGTGCCCTTTGTCCCACTGGCCGGCCTGGGGGTGGCGGCTCCAGAATACAGGGTCCTATTGTGTGCCCTGATGTCAGGCAGCTGGACTGCTGGGAGTGAGGATAAACAAGCAGCTGGAGCATCTCGCCTGAAGCCCCAGGAGAGGGCCAGAGTCCCCTGCCCTGGCCT	030	regLM	97	3.31326	0.00319236	1.37132	2.67101	0.00317439	1.11679
gen_1008	GAAAGGATACTCTGGCTGTCATGTGGACTGGAGGGAGCTGGAATTGAGGCAGTGAGCCCAGCTACCAGAGTCTTGAAATAGTTTAGTGTAAGATGCTGAATCATGAGTTGGGGCAGAGAGGATAACAAAGTAGGGAAGTGGGGGTAGAGACAGTCGTAAGACCTGAGGAGGGAATGGCTAAGTGAGGGTTGAAGGAGGAA	030	regLM	93	0.107347	2.5951	0.72646	0.0747584	2.59509	0.470782
gen_1009	CCTGAGAAAGGCTTCAACTAAAGAGCTATGGACAGGGACACTCTGTCACTTCCTGGGATTTTGACCCCCAGCTGTCCAACAGAGGAGGGTCTGTGCCTTTGCTCATTAGCCTAACTTAGATGATAGGTGACAAACTGAAGTGAGCTATGGGGAGAGGTACCTCATGTCCAGCTGAGGGAAGCAGCCAGGTCATCTCAAAA	030	regLM	26	-0.146156	0.0240585	-0.5563	-0.230314	0.0240902	-0.787347
gen_1010	TCTCTGCTCCCCAGAGTCCCTGCACGTGGCTTGACAGTGGCCTTGGTAGGACCCACTGGGGTGTTTCTTCGTCGCCCATGGGCCCTCATGCTGTTATCAGTTGGAAATGAATCAGAGATTAGGAAGCGGGGGGAGTGGTGGGGGTGGTATTGGGGCAAAAAGCCAAGGGGTGGTACACCCCTGTGATTCAAGGAGGGCTC	030	regLM	32	0.162907	0.81577	-0.14006	0.0287822	0.815761	-0.132275
gen_1011	ATTATGATACAGTCCAAGTATGTAACTTTCTGGGGACCAGACTTTGCTGAGAGTCATAATGGAGAGTCAAAGAGTCTGATGGCTGAGAGGGATGTGCCTGGGCTTGCCTTCATAAATGTTCATTGTCTCAGCCAAGGTTTTGGCAGGAGCGAGAGCAGGCTCAGATCAGTGTCACAGGCAAGATCAAGTGGTGGGAGGCA	030	regLM	98	2.02889	0.145407	6.09704	2.1558	0.145435	4.14685
gen_1012	CCTGAGAAAGGCTTCAACTAAAGAGCTATGGACAGGGACACTCTGTCACTTCCTGGGATTTTGACCCCCAGCTGTCCAACAGAGGAGGGTCTGTGCCTTTGCTCATTAGCCTAACTTAGATGATAGGTGACAAACTGAAATAAAGATATGCTCTGAGACAGAGGCAGAAAAATAAAAGGGGGTCTTGCTCTGTCACCCAG	030	regLM	39	-0.107712	0.0369599	-0.193987	-0.314086	0.0370916	-0.547485
gen_1013	CATGTTGCCTATGGTATTATAAGAATTGAAAGAAGGCCAGGCGCAGTGGCTCACACCTGTAATCCCAGCACTTTGGGAGGCTGAGGCGGGCAGATCACTTGAGGTCAGCAGTTCGAGACCAGCCTGGCCAACATGGTGAAACCCCATCTCTACTAAAAATACAAAAATTAGCCAGACATGGTGGCACATGCCTGTAATCC	030	regLM	42	-0.158476	3.49731	2.95653	0.137122	3.49683	1.72417
gen_1014	ATTAGCATGGAATTTGGACTTTGGAGCCATAATCCTGTTGTCTTCTTTCATTTAAAGAATATGGGCCAGGCGCGGTGGCTCACGCCTGTAATCCCAGCACTTTGGGAGGCTGAGGCGGGTGGATCATGAGGTCAGGAGATCGAGACCATCCTGGCTAACACAGTGAAACCCTGTCTCTACTAAAAATACAAAAAATTAGC	030	regLM	58	0.105378	2.97168	1.99659	0.697275	2.97166	1.34979
gen_1015	ACTGGGATTGCTTGGTTGAATGGTAGTTCCATTTTTAGTTCTTTGAGAAATCTCCAAACTGCTTTCCACAGCAGCTTAACTAATTTACATTCCCACCAGGACTGTCTTAAGTGTTTCCTTTTCTCCGCAGCCTTGCCAACATCTGTAATTTTTTGACTTTTTAATGATATTCTTTATGACTGGTGCAAGATGGTATCTCA	030	regLM	53	-0.0404516	0.658857	0.539235	0.229781	0.6587	0.154294
gen_1016	TCTCTGCTCCCCAGAGTCCCTGCACGTGGCTTGACAGTGGCCTTGGTAGGACCCACTGGGGTGTTTCTTCGTCGCCCATGGGCCCTCATGCTGTTATCAATTGGAAATGAATCAGAGATTAGGAAGCGGGGGGAGTGGTGGGGGTGTTATCGCCCAGTGCACACAGGTTACCACAGACGTTTATCAGTTGATTGGATTTG	030	regLM	20	0.190877	4.69905	-0.810042	0.121098	4.69903	-0.529852
gen_1017	ACTGGGATTGCTTGGTTGAATGGTAGTTCCATTTTTAGTTCTTTGAGGAATCTCCAAACTGCTTTCCACAGCAGCTTAACTAATTTACATTCCCACCAGCACTGTCTTAAGTGTTTCCTTTTCTCCGCAGCCTTGCCAACATCTGTAATTTTTTGACTTTTTAATGATATTCTTTATGACTGGTGCAAGATGGTATCTCA	030	regLM	51	-0.0371739	0.788349	0.559489	0.213789	0.788378	0.0150583
gen_1018	CCTGAGAAAGGCTTCAACTAAAGAGCTATGGACAGGGACACTCTGTCACTTCCTGGGATTTTGACCCCCAGCTGTCCAACAGAGGAGGGTCTGTGCCTTTGCTCATTAGCCTAACTTAGATGATAGGTGACAAACTGAAGTGAGCTATAGGGAGTTGTCCACTTCCAGGCTGCTATCAGTGTGACAGAGGTTATAAATAC	030	regLM	13	0.0185732	1.91817	-0.861428	-0.127749	1.91803	-0.787216
gen_1019	CATGTTGCCTATGGTATTATAAGAATTGAAAGAAGGCCAGGCGCAGTGGCTCACACCTGTAATCCCAGCACTTTGGGAGGCTGAGGCGGGCAGATCACTTGAGGTCAGGAGTTCAAGACCAGCCTGGCCAACATGGTGAAACCCCATCTCTACTAAAAATACAAAAATTAGCTGGGTGTGGTGGTGCATGCCTGTAATCC	030	regLM	37	-0.138018	3.73322	2.54713	0.157518	3.73305	1.56255
gen_1020	TGCACCCCCCCATCATTTTCTTCATTTGTATAATGAGGCTAATACCATGTGTACAACACCGCCGAAATGTACTGGCAGCTCCATATTTCCTTCTCTTATCTCATATTCATCTTTCCACATCTCCCATGAGAGTTTCTCAAGCTGATTAAATTCCTATCCAACATATGTCAGATACATAATTGGTGCCGGGTGCAGTGGCT	030	regLM	95	-0.177511	0.393223	1.91798	0.00131201	0.393273	-0.360845
gen_1021	CCTGAGAAAGGCTTCAACTAAAGAGCTATGGACAGGGACACTCTGTCACTTCCTGGGATTTTGACCCCCAGCTGTCCAACAGAGGAGGGTCTGTGCCTTCGCTCATTAGCCTAACTTAGATGATAGGTGACAAACTGAAGTGAGCTATAGGGAGTTGTCCACTTCCAGGCTGCTATCACTACAACCCAGGTGTTGTGATG	030	regLM	11	-0.335084	1.46889	-0.947182	-0.219495	1.46896	-1.02626
gen_1022	TCTCTGCTCCCCGGAGTCCCTGCACGTGGCTTGACAGTGGCCTTGGTAGGACCCACTGGGGTGTTTCTTCGTCGCCCATGGGCCCTCATGCTGTTATCAGTTGGAAATGAATCAGAGATTAGGAAGCGGGGGGAGTGGTGGGGGTGTTATCGCCCAGTGCACACAGGTTACCACAGACATTTAGCCCTCTGTGCTCAGCC	030	regLM	21	0.937906	5.17422	-0.481716	0.552014	5.17428	-0.123845
gen_1023	GATTTTTCTACTGCTAGGTTTTCCTTTTGGGGTTACGATTATTACAGGTGGCAATCAGTTAACTTAGTGGTTCTGTAGGCACCGCCCTATCTTCCAACTCACTTACATTTAAAAATTCACACAGAGAGGCTAGTGGGAAGCGGGTAGGTGTAAACAATGTGCTACAGTGAGAAACCTGGGGTTTTTCTTGGAGCAAGGAG	030	regLM	100	0.411523	1.50682	0.134142	0.30255	1.50685	0.2706
gen_1024	TCTCTGCTCCCCGGAGTCCCTGCACGTGGCTTGACAGTGGCCTTGGTAGGACCCACTGGGGTGTTTCTTCGTCGCCCATGGGCCCTCATGCTGTTATCAGTTGGAAATGAATCAGAGATTAGGAAGCGGGGGGAGTGGTGGGGGTGTTATCGCCCAGTGCACACAGGTTACCACAGACATTTAGCCCTTTATCAGAGGCC	030	regLM	25	0.665633	5.45691	-0.716777	0.569513	5.45692	-0.34874
gen_1025	GTTTAGCGTAAGAATCAGGGTCCAGCTGGTGCTCCCTAAACAGCAGCTGCTGTTCACTGTTGAAAGGCGCTCTGGAAGGCCAGGTGCGGTGGCTCATGCTTGTAATCCCAGCACTGTGGGAGGCCGAGGTGGGCGGATCACCTGAGGTAAGGAGTTCGAGACCAGCCTGACCGACATGGAGAAACCCCATCTCTCCTAAA	030	regLM	62	0.157531	2.65285	3.23179	0.310807	2.65301	0.802075
gen_1026	TCTCTGCTCCCCGGAGTCCCTGCACGTGGCTTGACAGTGGCCTTGGTAGGACCCACTGGGGTGTTTCTTCGTCGCCCATGGGCCCTCATGCTGTTATCAGTTGGAAATGAATCAGAGATTAGGAAGCGGGGGGAGTGGTGGGGGTGTTATCGCCCAGTGCACACGGGGCTCTCAGCTAATCTCTGGCGGCCCTGGGTGAT	030	regLM	4	0.708801	5.66233	-0.255551	0.802465	5.6623	0.0610951
gen_1027	CTCAGAATTAATGGAGAGGGCCAGTGGCGGCCTGTGCCCTTTGTCCCACCGGCCGGCCTGGGGGTGGCGGCTCCAGAATACAGGGTCCTATTGTGTGCCCTGATGTCAGGCAGCTGGACTGCTGGGAGTGAGGATAAACAAGCAGCTGGAGCATCTCGCCTGAAGCCCCAGGAGAGGGCCAGAGCCCCTGCAGCGTGCGG	030	regLM	97	2.89197	0.0317049	1.26077	2.16128	0.0317485	1.17244
gen_1028	GTTTAGCGTAAGAATCAGGGTCCAGCTGGTGCTCCCTAAACAGCAGCTGCTGTTCACTGTTGAAAGGCGCTCTGGAAGGCCAGGTGCGGTGGCTCATGCTTGTAATCCCAGCACTGTGGGAGGCCGAGGTGGGCGGATCACCTGAGGTAATGAGTTCGAGACCAGCCTGACCAACGTGGAGAAACCCCATCTCTCCTAAA	030	regLM	63	0.111023	2.34342	3.07267	0.278776	2.34346	0.37905
gen_1029	CCTGAGAAAGGCTTCAACTAAAGAGCTATGGACAGGGACACTCTGTCACTTCCTGGGATTTTGACCCCCAGCTGTCCAACAGAGGAGGGTCTGTGCCTTTGCTCATTAGTCCATTTTACAATTCTTTTTATTATACTTTAAGTTCTACGAGGCATGCGCAGGCTTAAATCCAGCAGTTCAAGGTTATAATCCCAGAACTT	030	regLM	53	1.51033	0.904689	0.973186	1.0067	0.904445	0.932512
gen_1030	TCTCTGCTCCCCGGAGTCCCTGCACGTGGCTTGACAGTGGCCTTGGTAGGACCCACTGGGGTGTTTCTTCGTCGCCCATGGGCCCTCATGCTGTTATCAGTTGGAAATGAATCAGAGATTAGGAAGCGGGGGGAGTGGTGGGGGTGTTATCGCCCAGTGCACACAGGTTACCACAGACATTTAGCCCTCTGAGGCCCTTA	030	regLM	22	0.884328	5.09807	-0.446623	0.562935	5.09804	-0.164255
gen_1031	AGAATTGGAAGGAGCTTAGGGGAAAGCTAGCCTCAGGTCAGAATTGCCTGCATGCCACTCGGCTGGCTAGTGAGCTGCTGAATCACCTTATTCCTGGAGAAAGACTTTGATACTGAGAAAACTGACTTGCTCAGCTCTTGCTACAACTGTGACCATCTCTGCAACAGTAAAGTAAAAACAAATACCTCTCTTGTTGCCAA	030	regLM	94	0.310745	0.816705	0.234924	0.0947219	0.81669	0.459606
gen_1032	CCTGAGAAAGGCTTCAACTAAAGAGCTATGGACAGGGACACTCTGTCACTTCCTGGGATTTTGACCCCCAGCTGTCCAACAGAGGAGGGTCTGTGCCTTCGCTCATTAGCCTAACTTAGATGATAGGTGACAAACTGAAGTGAGCTATGGGGAGAGGTACCTCATTTATCAGTTGAAGTGACAGCTGAATTATGTGGTAT	030	regLM	25	-0.416904	1.38043	-0.808851	-0.285953	1.3805	-0.967737
gen_1033	CTCAGAATTAATGGAGAGGGCCAGTGGCGGCCTGTGCCCTTTGTCCCACCGGCCGGCCTGGGGGTGGCGGCTCCAGAATACAGGGTCCTATTGTGTGCCCTGATGTCAGGCAGCTGGACTGCTGGGAGTGAGGATAAACAAGCAGCTGGAGCATCTCGCCTGAAGCCCCAGGAGAGGGCCAGAGCCCCTGCTGCAGGATG	030	regLM	97	2.95101	-0.0157096	1.23513	2.15794	-0.0157101	1.17996
gen_1034	CCAGTAATGGGATGGCTGGGTCCAATGGTATTTCTAGTTCTAGATCCCTGAGGAATTGCCACACTGACTTCCACAATGGTTGAACTAGTTTACAGTCCCGCCAACAGTGTAAAATTATTCCCATTTCTCCACATCCTCTCCAGCACCTGTTGTTTCCTGACTTTTTAATGATCGCCATTCTAACTGGTGTGAGATGGTAT	030	regLM	6	-0.594054	0.112016	-0.571491	-0.176488	0.112003	-0.489654
gen_1035	CCTGAGAAAGGCTTCAACTAAAGAGCTATGGACAGGGACACTCTGTCACTTCCTGGGATTTTGACCCCCAGCTGTCCAACAGAGGAGGGTCTGTGCCTTTGCTCATTAGCCTAACTTAGATGATAGGTGACAAACTGAAATGAGCTATAGGGAGTTGTCCACTTCCAGGCTGCTATCAGTGTGTCAGCTTGAGTTGATCT	030	regLM	10	-0.0180729	1.59048	-0.633468	-0.133829	1.59037	-0.794763
gen_1036	TCTCTGCTCCCCGGAGTCCCTGCACGTGGCTTGACAGTGGCCTTGGTAGGACCCACTGGGGTGTTTCTTCGTCGCCCATGGGCCCTCATGCTGTTATCAGTTGGAAATGAATCAGAGATTAGGAAGCGGGGGGAGTGGTGGGGGTGTTATCGCCCAGTGCACACAGGTTACCACAGACATCAAGCAAAGGCAGCTCCGGT	030	regLM	21	0.822228	4.98987	-0.531345	0.537303	4.98999	-0.245285
gen_1037	AAAAAAACAAACAACCCCATCAACAAGTGGGCGAAGGATATGAACAGACACTTCTCAAAAGAAGATATTTATTCAACCAAAAGACACATGAAAAAATGCTCATCATCACTGGCCATCAGAGAAATGCAAATCAAAACCACAATGAGATACCATCTCACACCAGTTAGAATGGCGATCATTGAAAAGTCAGGAAGCAACAG	030	regLM	48	-0.497425	0.938238	-0.0156906	-0.185373	0.938572	-0.370921
gen_1038	CTCAGAATTAATGGAGAGGGCCAGTGGCGGCCTGTGCCCTTTGTCCCACTGGCCGGCCTGGGGGTGGCGGCTCCAGAATACAGGGTCCTATTGTGTGCCCTGATGTCAGGCAGCTGGACTGCTGGGAGTGAGGATAAACAAGCAGCTGGAGCATCTCGCCTGAAGCCCCAGGAGAGGGCCAGAGCCCCTGCTGCAGCAGG	030	regLM	97	2.84755	0.0451044	1.39775	2.26753	0.0450139	1.2336
gen_1039	CCTGAGAAAGGCTTCAACTAAAGAGCTATGGACAGGGACACTCTGTCACTTCCTGGGATTTTGACCCCCAGCTGTCCAACAGAGGAGGGTCTGTGCCTTCGCTCATTAGCCTAACTTAGATGATAGGTGACAAACTGAAATGAGCTATAGGGAGTTGTCCACTTCCAGGCTGCTATCACTGTGGCGTATTTTTCAGGGCT	030	regLM	16	0.160945	0.848406	-0.259965	-0.0857839	0.848443	-0.403347
gen_1040	ATTATGATACAGTCCAAGTATGTAACTTTCTGGGGACCAGACTTTGCTGAGAGTCATAATGGAGAGTCAAAGAGTCTGATGGCTGAGAGGGGTGTGCCTGGGCTTGCCTTCATAAATGTTCATTGTCTCAGCCAAGGTTTTGGCAGGAGCGAGAGCAGGCTCAGATCAGTGTCACAGGCAGTACCTTACGTGGCTTGAGG	030	regLM	94	1.56287	0.174146	3.47027	1.37422	0.174189	1.85083
gen_1041	TCTCTGCTCCCCAGAGTCCCTGCACGTGGCTTGACAGTGGCCTTGGTAGGACCCACTGGGGTGTTTCTTCGTCGCCCATGGGCCCTCATGCTGTTATCAGTTGGAAATGAATCAGAGATTAGGAAGCGGGGGGAGTGGTGGGGGTGTTATCGCCCAGTGCACACAGGTTACCACAGACATTTATGAGAAGAGGGTGAGAA	030	regLM	23	0.525246	4.94967	-1.08908	0.122154	4.94971	-0.501475
gen_1042	CCCGAATACTGTGCTTTTCCGACGGGCTTAGGAAACGGCACACCAGGATATTATATCCTGCACCTGGCTCGGAGGGTCCTACGTGCACGGAGTCTCGCTGATTGCTAGCACAGAAGTCTGAGATCAAACTGCAAGGCGGCAGCGAGGCTGGGGGAGGGGTGCCCGCCATTGCCCAGGCTTGATTAGGTAAACAAAGCAGC	030	regLM	99	0.809189	0.24527	0.924345	1.82279	0.245319	-0.0421747
gen_1043	CCTGAGAAAGGCTTCAACTAAAGAGCTATGGACAGGGACACTCTGTCACTTCCTGGGATTTTGACCCCCAGCTGTCCAACAGAGGAGGGTCTGTGCCTTTGCTCATTAGCCTAACTTAGATGATAGGTGACAAACTGAAGTGAGCTATGGGGAGAGGTACCTCATTTATCTGTTGCTGGGTGTTGAATAATGTCCTCCAG	030	regLM	29	-0.253263	0.147268	-0.68382	-0.330601	0.14731	-0.802448
gen_1044	ACTGGGATTGCTTGGTTGAATGGTAGTTCCATTTTTAGTTCTTTGAGAAATCTCCAAACTGCTTTCCACAGCAGCTTAACTAATTTACATTCCCACCAGCACTGTCTTAAGTGTTTCCTTTTCTCCACAGCCTTGCCAGCATCTGTAATTTTTTGACTTTTTAATGATATTCTTTATGGCTGCTGTAATATATTCCCTTG	030	regLM	57	0.00577252	0.292035	0.71793	0.152662	0.291985	0.573377
gen_1045	TCTCTGCTCCCCAGAGTCCCTGCACGTGGCTTGACAGTGGCCTTGGTAGGACCCACTGGGGTGTTTCTTCGTCGCCCATGGGCCCTCATGCTGTTATCAATTGGAAATGAATCAGAGATTAGGAAGCGGGGGGAGTGGTGGGGGTGTTATCGCCCAGTGCACACGGGGCTCTCAGCTAATCTCTGGCGGCCCTGGGTTCA	030	regLM	1	-0.0331324	5.36628	-0.330144	0.207821	5.36631	0.000749755
gen_1046	TGCACCCCCCCATCATTTTCTTCATTTGTATAATGAGGCTAATACCATGTGTACAACACCGCCGAAATGTACTGGCAGCTCCATATTTCCTTCTCTTATCTCATATTCATCTTTCCACATCTCCCATGAGAGTTTCTCAAGCTGATTAAATTCCTATCCAACATATGTCAGATACATAATTTCAAAAAACAAGAAAATGT	030	regLM	98	-0.17815	0.107296	1.38748	0.00560637	0.10737	-0.4715
gen_1047	ATTAGCATGGAATTTGGACTTTGGAGCCATAATCCTGTTGTCTTCTTTCATTTAAAGAATATGGGCCGGGCGCGGTGGCTCACGCCTGTAATCCCAGCACTTTGGGAGGCCAAGGCGGGTGGATCATGAGGTCAGGAGATCGAGACCATCCTGGCTAACACGGTGAAAGCCTGTCTCTACTAAAAATACAAAAAATTAGC	030	regLM	58	0.214604	2.99869	1.48208	1.06309	2.99841	1.92088
gen_1048	GATTTTTCTACTGCTAGGTTTTCCTTTTGGGGTTACGATTATTACAGGTGGCAATCAGTTAACTTAGTGGTTCTGTAGGCACCGCCCTATCTTCCAACTCACTTACATTTAAAAATTCACACAGAGAGGCTAGTGGGAAGCTGTATTCAGAAATCTAGAGGCTAGAAAACTTGTAATCTCAGCACTTTGGGAGGCCAAGG	030	regLM	99	0.289181	0.176155	0.179821	-0.00311181	0.176179	0.0300331
gen_1049	CCTGAGAAAGGCTTCAACTAAAGAGCTATGGACAGGGACACTCTGTCACTTCCTGGGATTTTGACCCCCAGCTGTCCAACAGAGGAGGGTCTGTGCCTTTGCTCATTAGCCTAACTTAGATGATAGGTGACAAACTGAAGTGAGCTATAGGGAGTTGTCCACTTCCAGGCTGTTATCCGTCAAGCCTCGGTTTTTGATTG	030	regLM	15	0.0165744	0.446536	-0.297752	-0.119808	0.446577	-0.680718
gen_1050	CCTGAGAAAGGCTTCAACTAAAGAGCTATGGACAGGGACACTCTGTCACTTCCTGGGATTTTGACCCCCAGCTGTCCAACAGAGGAGGGTCTGTGCCTTTGCTCATTAGTCCATTTTACAGAGAGCTGATTGGTCTGTTTTACAGAGAGCTGATTGGTCTGTTTTACAGAGAGCTATGTCCAGAGATAAAATTCTTTTTT	030	regLM	51	3.86066	4.56887	3.97989	4.3461	4.56893	4.4311
gen_1051	ATTATGATACAGTCCAAGTATGTAACTTTCTGGGGACCAGACTTTGCTGAGAGTCATAATGGAGAGTCAAAGAGTCTGATGGCTGAGAGGGATGTGCCTGGGCTTGCCTTCATAAATGTTCATTGTCTCAGCCAAGGTTTTGGCAGGAGCGAGAGCAGGCTCAGATCAGTGTCACAGGCACGAAGCCCAGTGTCCCAGGG	030	regLM	95	1.884	0.0048238	6.01069	1.99467	0.00483519	3.92984
gen_1052	TCTCTGCTCCCCAGAGTCCCTGCACGTGGCTTGACAGTGGCCTTGGTAGGACCCACTGGGGTGTTTCTTCGTCGCCCATGGGCCCTCATGCTGTTATCAGTTGGAAATGAATCAGAGATTAGGAAGCGGGGGGAGTGGTGGGGGTGTTATCGCCCAGTGCACACAGGTTACCACAGACAGGGTCTGGGATCCCGTGCTGG	030	regLM	19	0.595813	4.67013	-0.797694	0.175307	4.67013	-0.363484
gen_1053	ATTAGCATGGAATTTGGACTTTGGAGCCATAATCCTGTTGTCTTCTTTCATTTAAAGAATATGGGCCGGGCGCGGTGGCTCACGCCTGTAATCCCAGCACTTTGGGAGGCCGAGGCAGGTGGATCACGAGGTCAGGAGATCGAGACCATCCTGGCTAACACAGTGAAACCCTGTCTCTACTAAAAATACAAAAAATTAGC	030	regLM	58	0.129724	3.12799	1.79571	0.884402	3.12785	2.24373
gen_1054	ATATTGGTACAGCACATTTGTCGCTATTAATAAACCAGTATCCAGGGCCAGGTGCAGTGGCTCACGCCTATAATCCCAGCACTTTGGGAGGCCGAGGTGGGTGGATCACCTGAGGTCAGGAGTTCGAGACCAGCCTGACCAACATGGGAAAACCCTGTCTCTACTAAAAATACAAAATTAGCTGGGCTTGGTGGTGCATG	030	regLM	47	-0.236924	2.96723	3.34636	0.107111	2.96742	1.02152
gen_1055	CTCTCTATTACATTCCATTCTCCATTCCATTCCATTCTCCATTCCATTCCACTCCATTCTCCATTCCATTCCACTCCATTCTCCATTCCATTCCATTCTCCATTATATTCTCCATTCCATTCCATTCTCCATTACATTCCATTCTCCATTACATTCCATTCTCCATTACATTCCATTCTCCATTCCATTCCATTCTCCAT	030	regLM	86	-0.6092	-0.244872	3.65466	-0.299843	-0.244915	-0.287775
gen_1056	TCTCTGCTCCCCGGAGTCCCTGCACGTGGCTTGACAGTGGCCTTGGTAGGACCCACTGGGGTGTTTCTTCGTCGCCCATGGGCCCTCATGCTGTTATCAATTGGAAATGAATCAGAGATTAGGAAGCGGGGGGAGTGGTGGGGGTGTTATCGCCCAGTGCACACGGGGCTCTCAGCTAATCTCTGGCGGCCCTGGGTCAT	030	regLM	3	0.00334871	5.3632	-0.189328	0.236724	5.3632	0.000176549
gen_1057	ATTAGCATGGAATTTGGACTTTGGAGCCATAATCCTGTTGTCTTCTTTCATTTAAAGAATATGGGCCGGGCGCGGTGGCTCACGCCTGTAATCCCAGCACTTTGGGAGGCCAAGGCGGGTAGATCACGAGGTCAGGAGATCGAGACCATCCTGGCTAACACGGTGAAAGCCTGTCTCTACTAAAAATACAAAAAATTAGC	030	regLM	58	0.256398	3.06219	2.32172	1.20869	3.06217	2.80603
gen_1058	AGAATTGGAAGGAGCTTAGGGGAAAGCTAGCCTCAGGTCAGAATTGCCTGCATGCCACTCGGCTGGCTAGTGAGCTGCTGAATCACCTTATTCCTGGAGAAAGACTTTGATACTGAGAAAACTGACTTGCTCAGCTCTTGCTACAACTGTGACCATCTCTGCAACAGTTTTCTGTTGTTTAAGAGGTTCATGAACTGTTA	030	regLM	96	0.099184	1.04778	0.454116	-0.0339616	1.04773	0.301601
gen_1059	CCAGTAATGGGATGGCTGGGTCAAATGGTATTTCTAGTTCTAGATCCCTGAGGAATTGCCACACTGACTTCCACAATGGTTGAACTAGTTTACAGTCCCACCAACAGTGTAAAATTATTCCTATTTCTCCACATCCTCTCCAGCACCTGTTGTTTCCTGACTTTTTAATGATCGCCATTCTAACTGGTGTGAGATGGTAT	030	regLM	4	-0.580407	0.0837834	-0.444151	-0.155664	0.083826	-0.523771
gen_1060	GATGGGTGCCTCTCCATGGAGCTCACATGTCATACTGCGCCCTGACTCATCACATGTCATTGTTCCTTTGTATTAATTTTCTGTCATCTACAGTGAGTTCCTTGAGGGCAGGGAAAGGGCTTTTTATCTCTGCATTACCAGAGCCCAACAGATACACACTGATTCTTATCCATCCACCCATTCATCCAACAAACATTTAT	030	regLM	0	-0.182829	5.21792	-0.756768	0.256131	5.21788	0.132389
gen_1061	AACAAAAAAACAAACAACCCCATCAACAAGTGGGCGAAGGATATGAACAGACACTTCTCAAAAGAAGATATTTATTCAACCAAAAGACACATGAAAAAATGCTCATCATCACTGGCCATCAGAGAAATGCAAATCAAAACCACAATGAGATACCATCTCACACCAGTTAGAATGGCGATCATTGAAAAGTCAGGAAGCAA	030	regLM	42	-0.457728	1.10731	0.00660479	-0.186902	1.10723	-0.333723
gen_1062	CCTGAGAAAGGCTTCAACTAAAGAGCTATGGACAGGGACACTCTGTCACTTCCTGGGATTTTGACCCCCAGCTGTCCAACAGAGGAGGGTCTGTGCCTTCGCTCATTAGCCTAACTTAGATGATAGGTGACAAACTGAAATGAGCTATAGGGAGTTGTCCACTTCCAGGCTGCTATCACTGTCTCAGATGTCCTGAGTAG	030	regLM	13	0.00359201	1.00933	-0.444919	-0.155734	1.0094	-0.691786
gen_1063	TCTCTGCTCCCCAGAGTCCCTGCACGTGGCTTGACAGTGGCCTTGGTAGGACCCACTGGGGTGTTTCTTCGTCGCCCATGGGCCCTCATGCTGTTATCAGTTGGAAATGAATCAGAGATTAGGAAGCGGGGGGAGTGGTGGGGGTGTTATCGCCCAGTGCACACAGGGTCCCATTCATTCCGGGAAAGCCAGGTTGCCAC	030	regLM	20	1.49828	5.54981	-0.33362	0.759403	5.54985	0.379901
gen_1064	TCTCTGCTCCCCAGAGTCCCTGCACGTGGCTTGACAGTGGCCTTGGTAGGACCCACTGGGGTGTTTCTTCGTCGCCCATGGGCCCTCATGCTGTTATCAGTTGGAAATGAATCAGAGATTAGGAAGCGGGGGGAGTGGTGGGGGTGTTATCGCCCAGTGCACACAGGTTACCACAGACATTTATCACTGGCCAAAGGGAG	030	regLM	20	0.666713	5.57801	-0.537911	0.431982	5.578	-0.253201
gen_1065	GATTTTTCTACTGCTAGGTTTTCCTTTTGGGGTTACGATTATTACAGGTGGCAATCAGTTAACTTAGTGGTTCTGTAGGCACCGCCCTATCTTCCAACTCACTTACATTTAAAAATTCACACAGAGAGGCTAGTGGGAAGCGGGTAGGTGTAAACAATGTGCTACAGTGAGAATCCACCATTAGCGGGGGTCAAACTTCA	030	regLM	100	1.07852	1.72809	0.320364	0.674975	1.72815	0.476657
gen_1066	AACCAGAAAAAAACAAACAACCCCATCAACAAGTGGGCGAAGGATATGAACAGACACTTCTCAAAAGAAGATATTTATTCAACCAAAAGACACATGAAAAAATGCTCATCATCACTGGCCATCAGAGAAATGCAAATCAAAACCACAATGAGATACCATCTCACACCAGTTAGAATGGCGATCATTAAAAAGTCAGGAAA	030	regLM	38	-0.510768	0.421073	0.0498064	-0.208301	0.42102	-0.364923
gen_1067	CCAGTAATGGGATGGCTGGGTCCAATGGTATTTCTAGTTCTAGATCCTTGAGGAATTGCCACACTGACTTCCACAATGGTTGAACTAGTTTACAGTCCCGCCAACAGTGTAAAATTATTCCTATTTCTCCACATCCTCTCCAGCACCTGTTGTTTCCTGACTTTTTAATGATCGCCATTCTAACTGGTGTGAGATGGTAT	030	regLM	6	-0.575124	0.359143	-0.522976	-0.168933	0.359036	-0.512347
gen_1068	GTTTAGCGTAAGAATCAGGGTCCAGCTGGTGCTCCCTAAACAGCAGCTGCTGTTCACTGTTGAAAGGCGCTCTGGAAGGCCAGGTGCGGTGGCTCATGCTTGTAATCCCAGCACTGTGGGAGGCTGAGGTGGGCGGATCACCTGAGGTAAGGAGTTCGAGACCAGCCTGACCAACGTGGAGAAACCCCATCTCTCCTAAA	030	regLM	63	0.0804033	2.4534	3.09349	0.174493	2.45352	0.363404
gen_1069	CTGGCTGTTTCCTGACTTTTTAATGATCGCCATTCTAACTGGTGGGAGATGGTATCTCATTGTGGTTTTGATTTGCATTTCTCTGATGGCCAGTGATGATGAGCATTTTTTCATGTGTCTCTTGGCTGCATAAATGTCTTCTTTTGAGAAGTGTCTGTTCATATCCTTTGCCCACTTTTTGATGGGGTTGTTTGTTTTTC	030	regLM	19	-0.270747	-0.0109793	0.0576861	-0.0656188	-0.0109455	-0.307384
gen_1070	CATTCCATTCCATTCCATTCTGCATTCTGTTCCATTCTCCATTCCATTCCATTCTCCATACCATCCTCCATTCCATTACACTGCATTCCATTCTCCATTCTATTTTATTCACCACGGCATTCCATTACATTTTCCATTCCATTCTCCATTACATTCCATTCTCCATTACATTCCATATTCTATTCCTTTCTCCATTCCAT	030	regLM	90	-0.964185	-0.384958	4.21483	-0.321941	-0.384906	-0.525626
gen_1071	CCCGAATACTGTGCTTTTCCGACGGGCTTAGGAAACGGCACACCAGGATATTATATCCTGCACCTGGCTCGGAGGGTCCTACGTGCACGGAGTCTCGCTGATTGCTAGCACAGAAGTCTGAGATCAAACTGCAAGGCGGCAGCGAGGCTGGGGGAGGGGTGCCCGCCATTGCCCAGGCTTGCCTGGGCTTGGGGAGGGGA	030	regLM	95	0.942966	-0.169901	2.95854	1.74033	-0.169853	1.68298
gen_1072	CCTGAGAAAGGCTTCAACTAAAGAGCTATGGACAGGGACACTCTGTCACTTCCTGGGATTTTGACCCCCAGCTGTCCAACAGAGGAGGGTCTGTGCCTTTGCTCATTAGCCTAACTTAGATGATAGGTGACAAACTGAAATAAAGATAGGGGGTGGGTAATGGCTCCCTCGTTGCTCAGGGTTGCAAGGCACGCGGGAGG	030	regLM	32	0.37403	0.763559	-0.28401	0.110596	0.763688	-0.307946
gen_1073	TCTCTGCTCCCCGGAGTCCCTGCACGTGGCTTGACAGTGGCCTTGGTAGGACCCACTGGGGTGTTTCTTCGTCGCCCATGGGCCCTCATGCTGTTATCAGTTGGAAATGAATCAGAGATTAGGAAGCGGGGGGAGTGGTGGGGGTGTTATCGCCCAGTGCACACGGGGCTCTCAGCTAATCTCTGGCGGCCCTGGGTTCC	030	regLM	2	0.729542	5.7189	-0.255682	0.857406	5.71891	0.0845754
gen_1074	CCTCAGAATTAATGGAGAGGGCCAGTGGCGGCCTGTGCCCTTTGTCCCACTGGCCGGCCTGGGGGTGGCGGCTCCAGAATACAGGGTCCTATTGTGTGCCCTGATGTCAGGCAGCTGGACTGCTGGGAGTGAGGATAAACAAGCAGCTGGAGCATCTCGCCTGAAGCCCCAGGAGAGGGCCAGAGCCCCTGCTGCAGGAG	030	regLM	97	3.18956	0.0915584	1.54871	2.43864	0.0914504	1.36744
gen_1075	GATTTTTCTACTGCTAGGTTTTCCTTTTGGGGTTACGATTATTACAGGTGGCAATCAGTTAACTTAGTGGTTCTGTAGGCACCGCCCTATCTTCCAACTCACTTACATTTAAAAATTCACACAGAGAGGCTAGTGGGAAGCGGGTAGGTGTAAACAATGTGCTACAGTGAGAAACCTGGGGCATTTTCCAAGATGGCAGA	030	regLM	101	1.8665	1.34301	2.37725	2.01367	1.34308	1.35002
gen_1076	GATTTTTCTACTGCTAGGTTTTCCTTTTGGGGTTACGATTATTACAGGTGGCAATCAGTTAACTTAGTGGTTCTGTAGGCACCGCCCTATCTTCCAACTCACTTACATTTAAAAATTCACACAGAGAGGCTAGTGGGAAGCGGGTAGGTGTAAACAATGTGCTACAGTGAGAAACCTGGGGCATTTTCCAAGATGACAGA	030	regLM	101	0.454841	1.03231	0.164242	0.146583	1.03227	0.174014
gen_1077	TCTCTGCTCCCCGGAGTCCCTGCACGTGGCTTGACAGTGGCCTTGGTAGGACCCACTGGGGTGTTTCTTCGTCGCCCATGGGCCCTCATGCTGTTATCAGTTGGAAATGAATCAGAGATTAGGAAGCGGGGGGAGTGGTGGGGGTGTTATCGCCCAGTGCACACGGGGCTCTCAGGCCTGCCCCACCCCAGGGGGATTGC	030	regLM	18	0.979118	5.80893	0.187977	0.968105	5.809	0.220606
gen_1078	TCTCTGCTCCCCAGAGTCCCTGCACGTGGCTTGACAGTGGCCTTGGTAGGACCCACTGGGGTGTTTCTTCGTCGCCCATGGGCCCTCATGCTGTTATCAGTTGGAAATGAATCAGAGATTAGGAAGCGGGGGGAGTGGTGGGGGTGTTATCGCCCAGTGCACACAGGTTACCACAGAGGTCACACGGTAGGTGAGGGGTA	030	regLM	23	0.793067	4.78451	-0.984344	0.706216	4.78467	-0.5525
gen_1079	CTCAGAATTAATGGAGAGGGCCAGTGGCGGCCTGTGCCCTTTGTCCCACCGGCCGGCCTGGGGGTGGCGGCTCCAGAATACAGGGTCCTATTGTGTGCGCTGATGTCAGGCAGCTGGACTGCTGGGAGTGAGGATAAACAAGCAGCTGGAGCATCTCGCCTGAAGCCCCAGGAGAGGGCCAGAGCCCCTGCAGCAGCAGA	030	regLM	97	3.79401	0.286415	1.7371	2.30125	0.286427	1.48449
gen_1080	CCAGTAATGGGATGGCTGGGTCAAATGGTATTTCTAGTTCTAGATCCCTGAGGAATCGCCACACTGACTTCCACAATGGTTGAACTAGTTTACAGTCCCACCAACAGTGTAAAATTATTCCTATTTCTCCACATCCTCTCCAGCACCTGTTGTTTCCTGACTTTTTAATGATCACCATTCTAACTGGTGTGAGATGGTAT	030	regLM	2	-0.609563	0.0128069	-0.439651	-0.158918	0.0128342	-0.522777
gen_1081	GTTTAGCGTAAGAATCAGGGTCCAGCTGGTGCTCCCTAAACAGCAGCTGCTGTTCACTGTTGAAAGGCGCTCTGGAAGGCCAGGTGCGGTGGCTCATGCTTGTAATCCCAGCACTGTGGGAGGCCGAGGTGGGCGGATCACCTGAGGTAGGGAGTTCGAGACCAGCCTGACCAACGTGGAGAAACCCCATCTCTACTAAA	030	regLM	63	0.137843	2.48237	3.22371	0.326523	2.48231	0.689154
gen_1082	AGAATTGGAAGGAGCTTAGGGGAAAGCTAGCCTCAGGTCAGAATTGCCTGCATGCCACTCGGCTAGTGAGCTGCTGAATCACCTTATTCCTGGAGAAAGCCTTTGATACTGAGAAAACTGACTTGCTCAGCTCTTGCTACAACTGTGACCATCTCTGCAACAGTAAAGTAAAAACAAATACCTCTCTTGTTGGGTAATGT	030	regLM	94	0.401592	1.46393	-0.091239	0.232561	1.46399	0.581593
gen_1083	ATTAGCATGGAATTTGGACTTTGGAGCCATAATCCTGTTGTCTTCTTTCATTTAAAGAATATGGGCCGGGCGCGGTGGCTCACGCCTGTAATCCCAGCACTTTGGGAGGCCGAGGCAGGTGGATCATGAGGTCAGGAGATCGAGACCATCCTGGCTAACACGGTGAAAGCCTGTCTCTACTAAAAATACAAAAAATTAGC	030	regLM	58	0.116689	2.94706	1.0456	0.912668	2.94686	1.49847
gen_1084	CCTGAGAAAGGCTTCAACTAAAGAGCTATGGACAGGGACACTCTGTCACTTCCTGGGATTTTGACCCCCAGCTGTCCAACAGAGGAGGGTCTGTGCCTTCGCTCATTAGCCTAACTTAGATGATAGGTGACAAACTGAAGTGAGCTATAGGGAGTTGTCCACTTCCAGGCTGCTATCACTACAGCCCAGGTGTTTGTATT	030	regLM	12	-0.243406	3.77222	-0.774436	-0.188317	3.77238	-0.999001
gen_1085	AAAAAAACAAACAACCCCATCAACAAGTGGGCGAAGGATATGAACAGACACTTCTCAAAAGAAGATATTTATTCAACCAAAAGACACATGAAAAAATGCTCATCATCACTGGCCATCAGAGAAATGCAAATCAAAACCACAATGAGATACCATCTCACACCAGTTAGAATGGCGATCATTAAAAAGTCAGGAAACCACAG	030	regLM	47	-0.469394	0.827288	-0.0610681	-0.16397	0.827288	-0.297846
gen_1086	ATTATGATACAGTCCAAGTATGTAACTTTCTGGGGACCAGACTTTGCTGAGAGTCATAATGGAGAGTCAAAGAGTCTGATGGCTGAGAGGGATGTGCCTGGGCTTGCCTTCATAAATGTTCATTGTCTCAGCCAAGGTTTTGGCAGGAGCGAGAGCAGGCTCAGATCAGTGTCACAGGCAGTACCTTACATGTCTGAAAT	030	regLM	94	2.06206	-0.00185671	6.3594	2.31574	-0.00184882	3.88679
gen_1087	AGAATTGGAAGGAGCTTAGGGGAAAGCTAGCCTCAGGTCAGAATTGCCTGCATGCCACTCGGCTGGCTAGTGAGCTGCTGAATCACCTTATTCCTGGAGAAAGACTTTGATACTGAGAAAACTGACTTGCTCAGCTCTTGCTACAACTGTGACCATCTCTGCAACAGTTTTCTGTTATTTTAGCAGTTTTTTCTTTGATC	030	regLM	96	0.227745	0.880529	0.83742	0.209526	0.880584	0.653061
gen_1088	CCAGTAATGGGATGGCTGGGTCCAATGGTATTTCTAGTTCTAGATCCCTGAGGAATTGCCACACTGACTTCCACAATGGTTGAACTAGTTTACAGTCCCACCAACAGTGTAAAATTATTCCTATTTCTCCACATCCTCTCCAGCATCTGTTGTTTCCTGCCTTTTTAATGATCACCATTCTAACTGGTGTGAGATGGTAT	030	regLM	4	-0.56093	0.0795212	-0.354048	-0.123535	0.078868	-0.421403
gen_1089	TCTCTGCTCCCCAGAGTCCCTGCACGTGGCTTGACAGTGGCCTTGGTAGGACCCACTGGGGTGTTTCTTCGTCGCCCATGGGCCCTCATGCTGTTATCAGTTGGAAATGAATCAGAGATTAGGAAGCGGGGGGAGTGGTGGGGGTGTTATCGCCCAGTGCACACAGGTTACCACAGACATTTATCACTGGCCAAAGGGAC	030	regLM	20	0.644283	5.52614	-0.555772	0.409507	5.52608	-0.272749
gen_1090	TCTCTGCTCCCCAGAGTCCCTGCACGTGGCTTGACAGTGGCCTTGGTAGGACCCACTGGGGTGTTTCTTCGTCGCCCATGGGCCCTCATGCTGTTATCAGTTGGAAATGAATCAGAGATTAGGAAGCGGGGGGAGTGGTGGGGGTGTTATCGCCCAGTGCACACAGGTTACCACAGACATTTAGCCCTCAGAGTTCATGA	030	regLM	21	0.849927	5.20243	-0.60883	0.426686	5.2024	-0.291969
gen_1091	GTTTAGCGTAAGAATCAGGGTCCAGCTGGTGCTCCCTAAACAGCAGCTGCTGTTCACTGTTGAAAGGCGCTCTGGAAGGCCAGGCGCGGTGGCTCATGCTTGTAATCCCAGCACTGTGGGAGGCCGAGGTGGGCGGATCACCTGAGGTAAGGAGTTCGAGACCAGCCTGACCAACATGGAGAAACCCCATCTCTCCTAAA	030	regLM	62	0.334692	2.94224	4.21956	0.641745	2.94222	2.05849
gen_1092	GTTTAGCGTAAGAATCAGGGTCCAGCTGGTGCTCCCTAAACAGCAGCTGCTGTTCACTGTTGAAAGGCGCTCTGGAAGGCCAGGTGCGGTGGCTCACGCCTGTAATCCCAGCACTGTGGGAGGCCGAGGTGGGCGGATCACCTGAGGTAGGGAGTTCGAGACCAGCCTGACCAACGTGGAGAAACCCCATCTCTCCTAAA	030	regLM	61	0.0888836	2.55034	3.39399	0.278326	2.55053	1.08066
gen_1093	CCTGAGAAAGGCTTCAACTAAAGAGCTATGGACAGGGACACTCTGTCACTTCCTGGGATTTTGACCCCCAGCTGTCCAACAGAGGAGGGTCTGTGCCTTCGCTCATTAGCCTAACTTAGATGATAGGTGACAAACTGAAGTGAGCTATGGGGAGAGGTTGCCACAACTTAAATGTTATCCGGTTTAACCCAGGGCACATG	030	regLM	27	0.179534	0.349008	-0.250494	-0.116932	0.349024	-0.521654
gen_1094	ATTAGCATGGAATTTGGACTTTGGAGCCATAATCCTGTTGTCTTCTTTCATTTAAAGAATATGGGCCAGGCGCGGTGGCTCACACCTGTAATCCCAGCACTTTGGGAGGCCGAGGCGGGTAGATCACGAGGTCAGGAGATCGAGACCATCCTGGCTAACACAGTGAAACCCTGTCTCTACTAAAAATACAAAAAATTAGC	030	regLM	58	0.0433802	2.70523	1.83867	0.717369	2.70539	1.52023
gen_1095	TCATTTGAAGATGGAGGCAGAGATTGGAGTGATACAACTATAAGTCAGGGAATGCCAAGGACTTGAGGTCATGTGTTACAGAAGCCCTAGGAAATGAGTCAATTTCCTGGCACAGCACTAAGACATGCTGGTATTCTTCATTCCATCCCTTTCCCCTATTCCTAAATGTGCTCCAGGGACAATGGGGAAGCTGGGGCATG	030	regLM	97	0.637692	-0.0820265	5.8541	3.40186	-0.0820313	6.50046
gen_1096	TCTCTGCTCCCCAGAGTCCCTGCACGTGGCTTGACAGTGGCCTTGGTAGGACCCACTGGGGTGTTTCTTCGTCGCCCATGGGCCCTCATGCTGTTATCAGTTGGAAATGAATCAGAGATTAGGAAGCGGGGGGAGTGGTGGGGGTGTTATCGCCCAGTGCACACGGGGCTCTCAGCTAAGGTCAAGCTGGAGCAGCACAG	030	regLM	14	0.848124	5.7248	-0.314168	0.435853	5.72485	0.0318944
gen_1097	TCATTTGAAGATGGAGGCAGAGATTGGAGTGATACAACTATAAGTCAGGGAATGCCAAGGACTTGAGGTCATGTGTTACAGAAGCCCTAGGAAATGAGTCAATTTCCTGGCACAGCACTAAGACATGCTGGTATTCTTCATTCCATCCCTTTCCCCTATTCCTAAATGTGCTCCAGGCACAGAGCGTTGTATCCTCTTTA	030	regLM	96	0.846852	-0.0368167	5.82878	3.60409	-0.0368375	6.44443
gen_1098	CTCAGAATTAATGGAGAGGGCCAGTGGCGGCCTGTGCCCTTTGTCCCACTGGCCGGCCTGGGGGTGGCGGCTCCAGAATACAGGGTCCTATTGTGTGCCCTGATGTCAGGCAGCTGGACTGCTGGGAGTGAGGATAAACAAGCAGCTGGAGCATCTCGCCTGAAGCCCCAGGAGAGGGCCAGAGCCCCTGCAGCAACAGG	030	regLM	96	2.87667	0.0218498	1.40218	2.2855	0.0219632	1.22758
gen_1099	TCTCTGCTCCCCAGAGTCCCTGCACGTGGCTTGACAGTGGCCTTGGTAGGACCCACTGGGGTGTTTCTTCGTCGCCCATGGGCCCTCATGCTGTTATCAGTTGGAAATGAATCAGAGATTAGGAAGCGGGGGGAGTGGTGGGGGTGTTATCGCCCAGTGCACACAGGTTACCACAGAGGTCAGAAGGCAATTTCTTTAAT	030	regLM	23	0.710486	5.17467	-0.719957	0.48734	5.17463	-0.486362
gen_1100	CCTGAGAAAGGCTTCAACTAAAGAGCTATGGACAGGGACACTCTGTCACTTCCTGGGATTTTGACCCCCAGCTGTCCAACAGAGGAGGGTCTGTGCCTTCGCTCATTAGCCTAACTTAGATGATAGGTGACAAACTGAAGTGAGCTATGGGGAGAGGTTGCCACAACCTCAGCTTTACCAAATTCTGAGTTACTTCTGGG	030	regLM	26	-0.09655	-0.0683296	-0.320276	-0.184046	-0.0682998	-0.585975
gen_1101	TCTCTGCTCCCCGGAGTCCCTGCACGTGGCTTGACAGTGGCCTTGGTAGGACCCACTGGGGTGTTTCTTCGTCGCCCATGGGCCCTCATGCTGTTATCAATTGGAAATGAATCAGAGATTAGGAAGCGGGGGGAGTGGTGGGGGTGTTATCGCCCAGTGCACACAGGTTACCACAGAGGTCACACGGTAGGTGAGCTACA	030	regLM	21	0.374557	3.08934	-1.17326	0.32029	3.0896	-0.683262
gen_1102	GTTTAGCGTAAGAATCAGGGTCCAGCTGGTGCTCCCTAAACAGCAGCTGCTGTTCACTGTTGAAAGGCGCTCTGGAAGGCCAGGTGCGGTGGCTCATGCTTGTAATCCCAGCACTGTGGGAGGCCGAGGTGGGCGGATCATGAGGTCAGGAGATCGAGACCATCCTGGCCAAAATGGTGAAACCCCGTCTCTACTAAAAA	030	regLM	65	0.283663	1.96505	1.96943	0.669561	1.9649	0.8456
gen_1103	CCAGTAATGGGATGGCTGGGTCCAATGGTATTTCTAGTTCTAGATCCCTGAGGAATCGCCACACTGACTTCCACAATGGTTGAACTAGTTTACAGTCCCACCAACAGTGTAAAATTATTCCTATTTCTCCACATCCTCTCCAGCACCTGTTGTTTCCTGCCTTTTTTTGTCTCTACCTTGCCGTGGCATGACATTCTCCT	030	regLM	20	-0.307214	-0.0296606	-0.375642	0.112819	-0.0296236	-0.138493
gen_1104	CCATCTGTTCCATCCTCACCCACCCAAGGAGCCGCCCCTGCTCCTAGAGACTCTGGGCACCACTGATAAGGGTGGGTACCAGGAACTCCACCCTTTACCGAGAAAGGCAGGCTGGTTTATCGCCACTCAGACCCAGCCAGCGACCACCCTGGGGAGTGTGTCAGCCACCAGGAGCATCGCTGTTGGGCAAAACTCTCTGG	030	regLM	85	0.0359085	7.39099	0.405015	0.00313617	7.39088	1.28538
gen_1105	GTTTAGCGTAAGAATCAGGGTCCAGCTGGTGCTCCCTAAACAGCAGCTGCTGTTCACTGTTGAAAGGCGCTCTGGAAGGCCAGGCGCGGTGGCTCATGCTTGTAATCCCGGCACTGTGGCAGGCCGAGGTGGGCGGATCACCTGAGGTAAGGAGTTCGAGACCAGCCTGACCAACGTGGAGAAACCCCATCTCTCCTAAA	030	regLM	65	0.179789	2.45392	3.53846	0.490096	2.45402	1.78147
gen_1106	AAACAAATTATGTAGAAGCCAAACCATTTTACTTCCCTCACTGTAGACCACACATAGCAACACAGTCTGTGTCTTTGTTCATGTTTTTAGAATTCCATCGACAGAGAGGAGAAAATACATCTGGGGAATTTGCCGCTGCTCTGAGTTCCAAAGTCCAAACCAATGTAATTGTTTCAGAATAACGGATGACACTTTTGGCT	030	regLM	100	2.42239	0.81416	0.437455	2.25924	0.814123	1.00808
gen_1107	TCTCTGCTCCCCGGAGTCCCTGCACGTGGCTTGACAGTGGCCTTGGTAGGACCCACTGGGGTGTTTCTTCGTCGCCCATGGGCCCTCATGCTGTTATCAATTGGAAATGAATCAGAGATTAGGAAGCGGGGGGAGTGGTGGGGGTGTTATCGCCCAGTGCACACAGGTTACCACAGACACCTATCAGTCAATAAGATCAA	030	regLM	22	0.084213	4.24568	-1.21749	0.0552303	4.24552	-0.763002
gen_1108	TCTCTGCTCCCCAGAGTCCCTGCACGTGGCTTGACAGTGGCCTTGGTAGGACCCACTGGGGTGTTTCTTCGTCGCCCATGGGCCCTCATGCTGTTATCAGTTGGAAATGAATCAGAGATTAGGAAGCGGGGGGAGTGGTGGGGGTGTTATCGCCCAGTGCACACGGGGCTCTCAGCTAATCTCTGGCGGCCCTGGGTTAG	030	regLM	2	0.790317	5.76734	-0.21456	0.921608	5.76732	0.108255
gen_1109	GATTTTTCTACTGCTAGGTTTTCCTTTTGGGGTTACGATTATTACAGGTGGCAATCAGTTAACTTAGTGGTTCTGTAGGCACCGCCCTATCTTCCAACTCACTTACATTTAAAAATTCACACAGAGAGGCTAGTGGGAAGCGGGTAGGTGTAAACAATGTGCTACAGTGAGAAACCTGGGGTTTTTCCCACATTTATTGG	030	regLM	100	0.845483	1.1645	0.318483	0.574825	1.16416	0.491375
gen_1110	TCTCTGCTCCCCAGAGTCCCTGCACGTGGCTTGACAGTGGCCTTGGTAGGACCCACTGGGGTGTTTCTTCGTCGCCCATGGGCCCTCATGCTGTTATCAGTTGGAAATGAATCAGAGATTAGGAAGCGGGGGGAGTGGTGGGGGTGTTATCGCCCAGTGCACACAGGTTACCACAGAGGTCACACGCTAGGGCCGGGAAA	030	regLM	22	1.19517	5.59246	-0.589743	1.42109	5.59245	-0.283483
gen_1111	TCTCTGCTCCCCAGAGTCCCTGCACGTGGCTTGACAGTGGCCTTGGTAGGACCCACTGGGGTGTTTCTTCGTCGCCCATGGGCCCTCATGCTGTTATCAGTTGGAAATGAATCAGAGATTAGGAAGCGGGGGGAGTGGTGGGGGTGGTATTGGGGCAAAAAGCCAAGGGGTGGTACACTCCTGTCCTGAGACGGCAGACT	030	regLM	31	0.323293	2.15478	-0.063666	0.0744265	2.15455	-0.0300146
gen_1112	CCTGAGAAAGGCTTCAACTAAAGAGCTATGGACAGGGACACTCTGTCACTTCCTGGGATTTTGACCCCCAGCTGTCCAACAGAGGAGGGTCTGTGCCTTTGCTCATTAGCCTAACTTAGATGATAGGTGACAAACTGAAGTGAGCTATAGGGAGTTGTCCACTTCCAGGCTGCTATCAGTATACCAGCTGGGGTGTAGGA	030	regLM	2	-0.12517	1.70906	-0.581403	-0.164034	1.70902	-0.83221
gen_1113	TCTCTGCTCCCCAGAGTCCCTGCACGTGGCTTGACAGTGGCCTTGGTAGGACCCACTGGGGTGTTTCTTCGTCGCCCATGGGCCCTCATGCTGTTATCAGTTGGAAATGAATCAGAGATTAGGAAGCGGGGGGAGTGGTGGGGGTGTTATCGCCCAGTGCACACGGGGCTCTCAGCTAATCTCTGGCGGCCCTGGGCCAT	030	regLM	5	0.805272	5.83476	-0.113146	1.05542	5.83478	0.179906
gen_1114	CCTGAGAAAGGCTTCAACTAAAGAGCTATGGACAGGGACACTCTGTCACTTCCTGGGATTTTGACCCCCAGCTGTCCAACAGAGGAGGGTCTGTGCCTTCGCTCATTAGCCTAACTTAGATGATAGGTGACAAACTGAAGTGAGCTATGGGGAGAGGTTGCCACAACTTAAATGTTATCCGGTTTAACCCAGGGCAGAAC	030	regLM	26	0.181632	0.410728	-0.090083	-0.125465	0.410662	-0.438666
gen_1115	GATTTTTCTACTGCTAGGTTTTCCTTTTGGGGTTACGATTATTACAGGTGGCAATCAGTTAACTTAGTGGTTCTGTAGGCACCGCCCTATCTTCCAACTCACTTACATTTAAAAATTCACACAGAGAGGCTAGTGGGAAGCGGGTAGGTGTAAACAATGTGCTACAGTGAGTCACACCCGTCACAGAGCGAGCAACTGGG	030	regLM	101	2.73494	3.82691	0.366139	2.71952	3.82699	1.09459
gen_1116	GTTTAGCGTAAGAATCAGGGTCCAGCTGGTGCTCCCTAAACAGCAGCTGCTGTTCACTGTTGAAAGGCGCTCTGGAAGGCCAGGCGCGGTGGCTCATGCTTGTAATCCCAGCACTGTGGGAGGCCGAGGTGGGCGGACCACCTGAGGTAAGGAGTTCGAGACCAGCCTGACCAACGTGGAGAAACCCCATCTCTCCTAAA	030	regLM	64	0.246835	2.77567	4.25371	0.628462	2.77547	1.5853
gen_1117	CCTGAGAAAGGCTTCAACTAAAGAGCTATGGACAGGGACACTCTGTCACTTCCTGGGATTTTGACCCCCAGCTGTCCAACAGAGGAGGGTCTGTGCCTTTGCTCATTAGCCTAACTTAGATGATAGGTGACAAACTGAAGTGAGCTATAGGGAGTTGTCCACTTCCAGGCTGTTATCCTTGAGGCTGCTGGCTATACTGC	030	regLM	15	0.0372702	0.580009	-0.543749	-0.0963839	0.580036	-0.672778
gen_1118	TCTCTGCTCCCCAGAGTCCCTGCACGTGGCTTGACAGTGGCCTTGGTAGGACCCACTGGGGTGTTTCTTCGTCGCCCATGGGCCCTCATGCTGTTATCAGTTGGAAATGAATCAGAGATTAGGAAGCGGGGGGAGTGGTGGGGGTGTTATCGCCCAGTGCACACAGGTTACCACAGATGGAATGAGGGAATGGGGGGAGG	030	regLM	23	1.04968	4.86323	-0.719908	0.382681	4.86321	-0.283046
gen_1119	GTTTAGCGTAAGAATCAGGGTCCAGCTGGTGCTCCCTAAACAGCAGCTGCTGTTCACTGTTGAAAGGCGCTCTGGAAGGCCAGGTGCGGTGGCTCATGCTTGTAATCCCAGCACTGTGGGAGGCCGAGGTGGGCGGGTCACCTGAGGTAAGGAGTTCGAGACCAGCCTGACCAACGTGGAGAAACCCCATCTCTCCTAAA	030	regLM	63	0.173256	2.41265	2.98022	0.387382	2.41265	0.423392
gen_1120	ATTAGCATGGAATTTGGACTTTGGAGCCATAATCCTGTTGTCTTCTTTCATTTAAAGAATATGGGCCAGGCGCGGTGGCTCACGCCTGTAATCCCAGCACTTTGGGAGGCCGAGGCAGGTGGATCACGAGGTCAGGAGATCGAGACCATCCTGGCTAACACAGTGAAACCCTGTCTCTACTAAAAATACAAAAAAATAGG	030	regLM	58	0.143024	2.96322	1.17065	0.821228	2.96306	2.14233
gen_1121	GTTTAGCGTAAGAATCAGGGTCCAGCTGGTGCTCCCTAAACAGCAGCTGCTGTTCACTGTTGAAAGGCGCTCTGGAAGGCCAGGTGCGGTGGCTCATGCTTGTAATTCCAGCACTGTGGGAGGCCGAGGTGGGCGGATCACCTGAGGTAGGGAGTTCGAGACCAGCCTGACCAACGTGGAGAAACCCCATCTCTCCTAAA	030	regLM	64	0.125769	2.278	2.54512	0.359185	2.27814	0.0322442
gen_1122	TCTCTGCTCCCCGGAGTCCCTGCACGTGGCTTGACAGTGGCCTTGGTAGGACCCACTGGGGTGTTTCTTCGTCGCCCATGGGCCCTCATGCTGTTATCAGTTGGAAATGAATCAGAGATTAGGAAGCGGGGGGAGTGGTGGGGGTGTTATCGCCCAGTGCACACAGGTTACCACAGACATTTATCAGTGGCCATTGGCGA	030	regLM	20	0.644712	5.35923	-0.597016	0.45793	5.35922	-0.362242
gen_1123	CCATCTGTTCCATCCTCACCCACCCAAGGAGCCGCCCCTGCTCCTAGAGACTCTGGGCACCACTGATAAGGGTGGGTACCAGGAACTCCACCCTTTACCGAGAAAGGCAGGCTGGTTTATCGCCACTCAGACCCAGCCAGCGACCACCCTGGGGAGTGTGTCAGCCACCAGGAGCATCGCTGTTTGTCAGGCTCATCTGG	030	regLM	85	0.0609166	7.29515	0.52154	0.0711528	7.29513	1.35447
gen_1124	CTAGCTGTACCAGCCGCTGCCCCGGACCTGCTGCCCTGCCCCACCCCCCCCTCCCCTGGCCAGCCTCCCCAGAGGCCAGAAGGCGCCTTATCGGGCAGGGTTAAGGAGGGGGACAGTTATCAGGGGCTGCAGCCTAGGTTGGGCCACAATGTCCTCGTCTCTTGAGGGTGGCAGGCTGTGCAGGCTCCCTGATAAAAGCC	030	regLM	2	0.522047	5.83522	0.666483	1.11881	5.83518	0.774747
gen_1125	CTCTCTATTACATTCCATTCTCCATTCCATTCCATTCTCCATTCCATTCCATTCTCCATTCCATTCCACTCCATTCTCCATTCCATTCCATTCTCCATTATATTCTCCATTCCATTCCATTCTCCATTACATTCCATTCTCCATTACATTCCATTCTCCATTACATTCCATTCTCCATTACATTCCATTCTCCATTCCAT	030	regLM	85	-0.506885	-0.233356	3.80494	-0.259015	-0.233283	0.139927
gen_1126	TCTCTGCTCCCCAGAGTCCCTGCACGTGGCTTGACAGTGGCCTTGGTAGGACCCACTGGGGTGTTTCTTCGTCGCCCATGGGCCCTCATGCTGTTATCAGTTGGAAATGAATCAGAGATTAGGAAGCGGGGGGAGTGGTGGGGGTGTTATCGCCCAGTGCACACAGGTTACCACAGAGGCAGCAAGCAACCACAGGAAAA	030	regLM	24	1.09625	5.3088	-0.549551	0.84527	5.30874	0.078814
gen_1127	TCATTTGAAGATGGAGGCAGAGATTGGAGTGATACAACTATAAGTCAGGGAATGCCAAGGACTTGAGGTCATGTGTTACAGAAGCCCTAGGAAATGAGTCAATTTCCTGGCACAGCACTAAGACATGCTGGTATTCTTCATTCCATCCCTTTCCCCTATTCCTAAATGTGCTCCAGGGACAATGGGGAAGCTGGAGCACG	030	regLM	95	0.703591	0.0195271	5.86304	3.46232	0.0195478	6.56065
gen_1128	CCATCTGTTCCATCCTCACCCACCCAAGGAGCCGCCCCTGCTCCTAGAGACTCTGGGCACCACTGATAAGGGTGGGTACCAGGAACTCCACCCTTTACCGAGAAAGGCAGGCTGGTTTATCGCCACTCAGACCCAGCCAGCGACCACCCTGGGGAGTGTGTCAGCCACCAGGAGCATCGCTGTTGGGGAAATGTTATTAT	030	regLM	84	-0.0364874	7.37417	0.352479	0.00303543	7.37416	1.23636
gen_1129	CCATCTGTTCCATCCTCACCCACCCAAGGAGCCGCCCCTGCTCCTAGAGACTCTGGGCACCACTGATAAGGGTGGGTACCAGGAACTCCACCCTTTACCGAGAAAGGCAGGCTGGTTTATCGCCACTCAGACCCAGCCAGCAACCACCCTGGGGAGTGTGTCAGCCACCAGGAGCATCGCTGTTGGGGAAATGGTAGCGT	030	regLM	84	0.418503	8.11174	0.772362	0.229373	8.11164	1.73548
gen_1130	CTAGCTGTACCAGCCGCTGCCCCGGACCTGCTGCCCTGCCCCACCCCCCCCTCCCCTGGCCAGCCTCCCCAGAGGCCAGAAGGCGCCTTATCGGGCAGGATTAAGGAGGGGGACAGTTATCAGGGGCTGCAGCCTAGGTTGGGCCACAATGTCCTCGTCTCTTGAGGGTGGCAGGCTGTGCAGGCTCCCTGACAAGGGGG	030	regLM	5	-0.0701954	5.15553	0.455086	0.266987	5.15557	0.508801
gen_1131	TCTCTGCTCCCCAGAGTCCCTGCACGTGGCTTGACAGTGGCCTTGGTAGGACCCACTGGGGTGTTTCTTCGTCGCCCATGGGCCCTCATGCTGTTATCAATTGGAAATGAATCAGAGATTAGGAAGCGGGGGGAGTGGTGGGGGTGTTATCGCCCAGTGCACACAGGTTACCACAGATGGAATAAGGGAAGCCAAGCAGA	030	regLM	23	0.0958857	4.24682	-0.714501	0.0193863	4.2468	-0.397867
gen_1132	CTAGCTGTACCAGCCGCTGCCCCGGACCTGCTGCCCTGCCCCACCCCCCCCTCCCCTGGCCAGCCTCCCCAGAGGCCAGAAGGCGCCTTATCGGGCAGGATTAAGGAGGGGGACAGTTATCAGGGGCTGCAGCCTAGATTGGGCCACAATGTCCTCGTCTCTTGAGGGTGGCAGGCTGTGCAGGCTCCCTGACAGGCAGG	030	regLM	7	0.154759	4.42991	0.541237	0.304046	4.42988	0.489735
gen_1133	AGAATTGGAAGGAGCTTAGGGGAAAGCTAGCCTCAGGTCAGAATTGCCTGCATGCCACTCGGCTAGTGAGCTGCTGAATCACCTTATTCCTGGAGAAAGATTTTGTTTTTTTCTTACAGATGCATTTGAGGATGGCGAAGTCATGGGTCATCATACTACAAGGTGAACTTCATTCCTTTAAATATTAATTTGAATGCTCT	030	regLM	90	1.1923	0.864131	0.757572	0.855004	0.864041	0.800456
gen_1134	TCTCTGCTCCCCAGAGTCCCTGCACGTGGCTTGACAGTGGCCTTGGTAGGACCCACTGGGGTGTTTCTTCGTCGCCCATGGGCCCTCATGCTGTTATCAGTTGGAAATGAATCAGAGATTAGGAAGCGGGGGGAGTGGTGGGGGTGTTATCGCCCAGTGCACACAGGTTACCACAGAGGTCACACGGTAGGTGCTCACTG	030	regLM	23	0.886761	4.82685	-0.888382	0.806548	4.82696	-0.56616
gen_1135	CCAGTAATGGGATGGCTGGGTCCAATGGTATTTCTAGTTCTAGATCCCTGAGGAATTGCCACACTGACTTCCACAATGGTTGAACTAGTTTACAGTCCCGCCAACAGTGTAAAATTATTCCTATTTCTCCACATCCTCTCCAGCACCTGTTGTTTCCTGCCTTTTTTGTTTGCCTTTTTTTTGTAGAGACGGGGTTTCAC	030	regLM	23	0.653369	2.65656	-0.105901	0.912805	2.65652	0.0549813
gen_1136	ATATTGGTACAGCACATTTGTCGCTATTAATAAACCAGTATCCAGGGCCAGGTGCAGTGGCTCACGCCTGTAATCCCAGCACTTTGGGAGGCCGAGGCAGGTGGATCACCTGAGGTCAGGAGTTCGAGACCAGACTGACCAACATGGGAAAACCCTGTCTCTACTAAAAATACAAAATTAGCTGGGCTTGGTGGTGCATG	030	regLM	49	-0.322574	2.59314	2.26077	-0.2428	2.59316	-0.127067
gen_1137	CCTGAGAAAGGCTTCAACTAAAGAGCTATGGACAGGGACACTCTGTCACTTCCTGGGATTTTGACCCCCAGCTGTCCAACAGAGGAGGGTCTGTGCCTTCGCTCATTAGCCTAACTTAGATGATAGGTGACAAACTGAAATGAGCTATAGGGAGTTGTCCACTTCCAGGCTGCTATCACTGTCTCAGATTTTGGGGGGCA	030	regLM	11	-0.161859	-0.000136095	-0.23862	-0.174292	-7.18e-05	-0.596326
gen_1138	CCAGTAATGGGATAGCTGGGTCAAATGGTATTTCTAGTTCTAGATCCCTGAGGAATCGCCACACTGACTTCCACAATGGTTGAACTAGTTTACAGTCCCACCAACAGTGTAAAATTATTCCTATTTCTCCACATCCTCTCCAGCACCTGTTGTTTCCTGACTTTTTAATGATCACCATTCTAACTGGTGTGAGATGGTAT	030	regLM	3	-0.604628	-0.0148908	-0.443928	-0.184037	-0.0150022	-0.529667
gen_1139	GTTTAGCGTAAGAATCAGGGTCCAGCTGGTGCTCCCTAAACAGCAGCTGCTGTTCACTGTTGAAAGGCGCTCTGGAAGGCCAGGTGCGGTGGCTCATGCTTGTAATCCCAGCACTGTGGGAGGCCGAGGTGGGCGGATCACCTGAGGTAAGGAGTTCGAGACCAGCCCGACCAACGTGGAGAAACCCCATCTCTCCTAAA	030	regLM	63	0.140247	2.57782	3.03704	0.337173	2.57786	0.708952
gen_1140	TCTCTGCTCCCCAGAGTCCCTGCACGTGGCTTGACAGTGGCCTTGGTAGGACCCACTGGGGTGTTTCTTCGTCGCCCATGGGCCCTCATGCTGTTATCAGTTGGAAATGAATCAGAGATTAGGAAGCGGGGGGAGTGGTGGGGGTGTTATCGCCCAGTGCACACGGGGCTCTCAGCTAAGGTCAAGCTAGGGTCAGGGTC	030	regLM	12	0.78043	5.98189	-0.445888	0.743691	5.98183	-0.228233
gen_1141	ACTGGGATTGCTTGGTTGAATGGTAGTTCCATTTTTAGTTCTTTGAGAAATCTCCAAACTGCTTTCCACAGCAGCTTAACTAATTTACATTCCCACCAACAGTGTAAAAATGTTCCTATTTCTCCACATCCTCTCCAGCATCTGTTGTTTCCTGACTTTTTAATGATCACTATTCTAACTGGTGTGAGATGGTATCTCAT	030	regLM	30	-0.470763	1.9022	-0.177249	-0.111528	1.90226	-0.277444
gen_1142	ATATTGGTACAGCACATTTGTCGCTATTAATAAACCAGTATCCAGGGCCAGGTGCAGTGGCTCACGCCTGTAATCCCAGCACTTTGGGAGGCCGAGGCAGGTGGATCACCTGAGGTCAGGAGTTCGAGACCAGCCTGACCAACATGGGAAAACCCTGTCTCTACTGAAAATACAAAATTAGCTGGGCTTGGTGGTGCATT	030	regLM	49	-0.315366	2.62989	3.13947	-0.157232	2.63015	0.522004
gen_1143	TCATTTGAAGATGGAGGCAGAGATTGGAGTGATACAACTATAAGTCAGGGAATGCCAAGGACTTGAGGTCATGTGTTACAGAAGCCCTAGGAAATGAGTCAATTTCCTGGCACAGCACTAAGACATGCTGGTATTCTTCATTCCATCCCTTTCCCCTATTCCTAAATGTGCTCCAGGGACAGTCCACAGTACAAAGGGCT	030	regLM	96	1.17277	-0.0318678	5.72843	3.7237	-0.0318486	6.42561
gen_1144	CATTCCATTCCATTCCATTCTGCATTCTGTTCCATTCTCCATTCCATTCCATTCTCCATACCATCCTCCATTCCATTACACTGCATTCCATTCTCCATTATATTTTATTCACCACGGCATTCCATTACATTTTCCATTCCATTCTCCATTCAATTCTCCATTACATTCCATATTCTATTCCTTTCTCCATTCCATTCCCC	030	regLM	90	-0.93239	-0.363264	3.93906	-0.364659	-0.363251	-0.842888
gen_1145	TCTCTGCTCCCCAGAGTCCCTGCACGTGGCTTGACAGTGGCCTTGGTAGGACCCACTGGGGTGTTTCTTCGTCGCCCATGGGCCCTCATGCTGTTATCAGTTGGAAATGAATCAGAGATTAGGAAGCGGGGGGAGTGGTGGGGGTGGTATTGGGGCAAAAAGCCAAGGGGTGGCAAGCCCAGGTAATACTTATTGGGTAC	030	regLM	31	0.273344	1.24915	-0.694397	0.0770587	1.24914	-0.50493
gen_1146	CCTGAGAAAGGCTTCAACTAAAGAGCTATGGACAGGGACACTCTGTCACTTCCTGGGATTTTGACCCCCAGCTGTCCAACAGAGGAGGGTCTGTGCCTTTGCTCATTAGCCTAACTTAGATGATAGGTGACAAACTGAAGTGAGCTATGGGGAGAGGTACCTCATTTATCTGTTGCTGGGTGTGGCAAGGCCTATCCCTT	030	regLM	28	0.463428	2.23319	-0.302669	-0.0754505	2.23329	-0.647574
gen_1147	TCTCTGCTCCCCAGAGTCCCTGCACGTGGCTTGACAGTGGCCTTGGTAGGACCCACTGGGGTGTTTCTTCGTCGCCCATGGGCCCTCATGCTGTTATCAGTTGGAAATGAATCAGAGATTAGGAAGCGGGGGGAGTGGTGGGGGTGTTATCGCCCAGTGCACACAGGTTACCACAGACAGCAAGCTAGTTTCCAGAGCCA	030	regLM	24	1.02481	5.31628	-0.51025	0.689935	5.31636	0.0300751
gen_1148	TCTCTGCTCCCCAGAGTCCCTGCACGTGGCTTGACAGTGGCCTTGGTAGGACCCACTGGGGTGTTTCTTCGTCGCCCATGGGCCCTCATGCTGTTATCAGTTGGAAATGAATCAGAGATTAGGAAGCGGGGGGAGTGGTGGGGGTGTTATCGCCCAGTGCACACAGGTTACCACAGAGGTCATAAGTTCCATGAGGGCAG	030	regLM	22	1.16673	5.2929	-0.427654	0.824769	5.2929	-0.394642
gen_1149	CCTAGAGACTCTGGGCACCACTGATAAGGGTGGGTACCAGGAACTCCACCCTTTACCGAGAAAGGCAGGCTGGTTTATCGCCACTCAGACCCAGCCAGCGACCACCCTGGGGAGTGTGTCAGCCACCAGGAGCATCGCTGTTGGGGAAATGTTATTAACTAGGAAGGTTTTTGCCTCTGGCAGGTCAGTTTCCGGGAACT	030	regLM	23	0.7459	6.16341	0.530309	0.471808	6.16345	1.6132
gen_1150	GTTTAGCGTAAGAATCAGGGTCCAGCTGGTGCTCCCTAAACAGCAGCTGCTGTTCACTGTTGAAAGGCGCTCTGGAAGGCCAGGTGCGGTGGCTCATGCTTGTAATCCCAGCACTGTGGGAGGCCGAGGTGGGCGGATCACCTGAGGTGGGGAGTTCGAGACCAGCCTGACCAACGTGGAGAAACCCCATCTCTCCTAAA	030	regLM	63	0.0801293	2.35531	3.00502	0.261042	2.35539	0.414117
gen_1151	CCTCAGAATTAATGGAGAGGGCCAGTGGCGGCCTGTGCCCTTTGTCCCACTGGCCGGCCTGGGGGTGGCGGCTCCAGAATACAGGGTCCTATTGTGTGCCCTGATGTCAGGCAGCTGGACTGCTGGGAGTGAGGATAAACAAGCAGCTGGAGCATCTCGCCTGAAGCCCCAGGAGAGGGCCAGAGCCCCTGCAGCAGGAG	030	regLM	97	3.13474	0.0894546	1.52545	2.40915	0.0894602	1.35963
gen_1152	GATTTTTCTACTGCTAGGTTTTCCTTTTGGGGTTACGATTATTACAGGTGGCAATCAGTTAACTTAGTGGTTCTGTAGGCACCGCCCTATCTTCCAACTCACTTACATTTAAAAATTCACACAGAGAGGCTAGTGGGAAGCGGGTAGGTGTAAACAATGTGCTACAGTGAGAAACCTGGGGTTTTTCCCACACTAGTTAG	030	regLM	99	1.07194	1.4814	0.632895	0.628148	1.48134	0.740293
gen_1153	ATTAGCATGGAATTTGGACTTTGGAGCCATAATCCTGTTGTCTTCTTTCATTTAAAGAATATGGGCCGGGCGCAGTGGCTCACGCCTGTAATCCCAGCACTTTGGGAGGCCGAGGCGGGTGGATCATGAGGTCAGGAGATCGAGACCATCCTGGCTAACACAGTGAAACCCTGTCTCTACTAAAAATACAAAAAATTAGC	030	regLM	58	0.289129	2.97197	1.93323	1.19762	2.97176	2.1834
gen_1154	ACTGGGATTGCTTGGTTGAATGGTAGTTCCATTTTTAGTTCTTTGAGAAATCTCCAAACTGCTTTCCACAGCAGCTTAACTAATTTACATTCCCACCAGCACTGTCTTAAGTGTTTCCTTTTCTCCGCAGCCTTGCCAACATCTGTAATTTTTTGACTTTTTAATGATATTCTTTATGACTGGTGCAAGATGGTATCTTA	030	regLM	53	0.0255414	0.668106	0.581574	0.273786	0.668073	0.238912
gen_1155	CCTGAGAAAGGCTTCAACTAAAGAGCTATGGACAGGGACACTCTGTCACTTCCTGGGATTTTGACCCCCAGCTGTCCAACAGAGGAGGGTCTGTGCCTTCGCTCATTAGCCTAACTTAGATGATAGGTGACAAACTGAAATGAGCTATAGGGAGTTGTCCACTTCCAGGCTGCTATCACTGTCTCAGATGTTGTAATTGT	030	regLM	13	0.0443062	1.09233	-0.525514	-0.171715	1.09219	-0.653195
gen_1156	CCTGAGAAAGGCTTCAACTAAAGAGCTATGGACAGGGACACTCTGTCACTTCCTGGGATTTTGACCCCCAGCTGTCCAACAGAGGAGGGTCTGTGCCTTCGCTCATTAGCCTAACTTAGATGATAGGTGACAAACTGAAGTGAGCTATGGGGAGAGGTACCTCATTTATCTGTTGCTGGGTGTGGCAGGGCCTCTGGGAG	030	regLM	25	0.288786	2.22693	-0.532673	-0.103774	2.22696	-0.618619
gen_1157	CCTGAGAAAGGCTTCAACTAAAGAGCTATGGACAGGGACACTCTGTCACTTCCTGGGATTTTGACCCCCAGCTGTCCAACAGAGGAGGGTCTGTGCCTTCGCTCATTAGCCTAACTTAGATGATAGGTGACAAACTGAAGTGAGCTATGGGGAGAGGTACCTCATTTATCTGTTGCTGGGTGTTGCATTTACTCAGTGAC	030	regLM	27	-0.0356576	0.903479	-0.484487	-0.213759	0.90329	-0.613334
gen_1158	TGCACCCCCCCATCATTTTCTTCATTTGTATAATGAGGCTAATACCATGTGTACAACACCGCCGAAATGTACTGGCAGCTCCATATTTCCTTCTCTTATCTCATATTCATCTTTCCACATCTCCCATGAGAGTTTCTCAAGCTGATTAAATTCCTATCCAACATATGTCAGATACATAATTTCAAAAAACAAGGAAATGA	030	regLM	97	-0.143472	0.274112	1.31279	0.0839246	0.27416	-0.370276
gen_1159	CCTGAGAAAGGCTTCAACTAAAGAGCTATGGACAGGGACACTCTGTCACTTCCTGGGATTTTGACCCCCAGCTGTCCAACAGAGGAGGGTCTGTGCCTTCGCTCATTAGCCTAACTTAGATGATAGGTGACAAACTGAAATAAAGATATGAATTTTGGAGGAATGTGGAGACAAAGTTTCAATTTTTTCTGCATTGATCA	030	regLM	36	-0.165688	-0.0393765	0.0410081	-0.451513	-0.0393391	-0.320819
gen_1160	GATTTTTCTACTGCTAGGTTTTCCTTTTGGGGTTACGATTATTACAGGTGGCAATCAGTTAACTTAGTGGTTCTGTAGGCACCGCCCTATCTTCCAACTCACTTACATTTAAAAATTCACACAGAGAGGCTAGTGGGAAGCGGGTAGGTGTAAACAATGTGCTACAGTGAGAATCCACCATTAGCGGGGGTCAAAGGACA	030	regLM	100	1.47529	1.81004	0.257492	1.36498	1.8101	0.514095
gen_1161	CCTGAGAAAGGCTTCAACTAAAGAGCTATGGACAGGGACACTCTGTCACTTCCTGGGATTTTGACCCCCAGCTGTCCAACAGAGGAGGGTCTGTGCCTTCGCTCATTAGCCTAACTTAGATGATAGGTGACAAACTGAAGTGAGCTATGGGGAGAGGTACCTCATTTATCTGTTGCTGGGTGTGGCAGGGCCTCTGGGAA	030	regLM	25	0.248392	2.25506	-0.49508	-0.109914	2.25491	-0.641791
gen_1162	CAAATCAATTAAGCTAAAATAAATCAAAGTTGGAACAAAGCCACCAATATAATGTTAAAAAGTATTCAAATGTAAAACCAATTGAGCCAAAAATAGCATAATGATGTAACCATTTGGAATGAGCATTTATGAGGCTTTAAATCATTTTTATATTACTATTTTAAGGATCAGCACTGCCAGCACTGCAAACTTAAAATCAA	030	regLM	91	0.609414	0.307881	2.64042	0.499481	0.307863	2.89256
gen_1163	TCTCTGCTCCCCAGAGTCCCTGCACGTGGCTTGACAGTGGCCTTGGTAGGACCCACTGGGGTGTTTCTTCGTCGCCCATGGGCCCTCATGCTGTTATCAGTTGGAAATGAATCAGAGATTAGGAAGCGGGGGGAGTGGTGGGGGTGTTATCGCCCAGTGCACACAGGTTACCACAGACATTTATCACTGGCCAAAGTGAC	030	regLM	21	0.609407	5.48845	-0.707835	0.324689	5.48843	-0.334692
gen_1164	ACTGGGATTGCTTGGTTGAATGGTAGTTCCATTTTTAGTTCTTTGAGAAATCTCCAAACTGCTTTCCACAGCAGCTTAACTAATTTACATTCCCACCAGCACTGTCTTAAGTGTTTCCTTTTCTCCGCAGCCTTGCCAGCATCTGTAATTTTTTGACTTTTTAATGATATTCTTTATGACTGGTGCAGGATGGTATCTCA	030	regLM	52	0.0516416	0.507629	0.711842	0.267804	0.507652	0.735062
gen_1165	CCATCTGTTCCATCCTCACCCACCCAAGGAGCCGCCCCTGCTCCTAGAGACTCTGGGCACCACTGATAAGGGTGGGTACCAGGAACTCCACCCTTTACCGAGAAAGGCAGGCTGGTTTATCGCCACTCAGACCCAGCCAGCAACCACCCTGGGGAGTGTGTCAGCCACCAGGAGCATCGCTGTTGTGGCAGCTTCGGTCT	030	regLM	85	0.418935	8.15009	0.813978	0.263911	8.15015	1.91078
gen_1166	TCTCTGCTCCCCAGAGTCCCTGCACGTGGCTTGACAGTGGCCTTGGTAGGACCCACTGGGGTGTTTCTTCGTCGCCCATGGGCCCTCATGCTGTTATCAATTGGAAATGAATCAGAGATTAGGAAGCGGGGGGAGTGGTGGGGGTGTTATCGCCCAGTGCACACGGGGCTCTCAGCTAATCTCTGGCGGCCCTGGGTCCA	030	regLM	2	-0.0473459	5.39069	-0.253354	0.241096	5.39063	0.0540646
gen_1167	TCTCTGCTCCCCGGAGTCCCTGCACGTGGCTTGACAGTGGCCTTGGTAGGACCCACTGGGGTGTTTCTTCGTCGCCCATGGGCCCTCATGCTGTTATCAGTTGGAAATGAATCAGAGATTAGGAAGCGGGGGGAGTGGTGGGGGTGTTATCGCCCAGTGCACACGGGGCTCTCAGGCAATTCCCGGCCTTAGTATGACGT	030	regLM	14	1.13287	5.81791	0.0248642	0.723437	5.81783	0.240739
gen_1168	TCTCTGCTCCCCAGAGTCCCTGCACGTGGCTTGACAGTGGCCTTGGTAGGACCCACTGGGGTGTTTCTTCGTCGCCCATGGGCCCTCATGCTGTTATCAGTTGGAAATGAATCAGAGATTAGGAAGCGGGGGGAGTGGTGGGGGTGTTATCGCCCAGTGCACACAGGGTCCCATTCGTTCAGGTCAATGGCTCGAAGGTG	030	regLM	20	0.520035	4.89449	-0.879809	0.176356	4.89446	-0.454391
gen_1169	TCTCTGCTCCCCAGAGTCCCTGCACGTGGCTTGACAGTGGCCTTGGTAGGACCCACTGGGGTGTTTCTTCGTCGCCCATGGGCCCTCATGCTGTTATCAGTTGGAAATGAATCAGAGATTAGGAAGCGGGGGGAGTGGTGGGGGTGTTATCGCCCAGTGCACACGGGGCTCTCAGCTAATCTCTGGCGGCCCTGGGTGGA	030	regLM	4	0.782086	5.88819	-0.17857	0.979913	5.88813	0.151969
gen_1170	CACACCACCATTACAACATCGATAACTGCCCAGTAACCATTTGGAATACCTCCAACAATGAGGAACAATATTTCTTGGACTCTCAGTTTATGATAAGTGCGCCTCTGTTGTCAGCCGGGAGCGGTGGCTCATGCCTGTAATCCCAGCACTTTGGGAGGCCGAGGCAGGTGGATCACCTGAGGTCAGGAGTTCGAGACCAG	030	regLM	90	-0.0340222	2.34452	-0.138737	0.0513918	2.34439	-0.312031
gen_1171	CCATCTGTTCCATCCTCACCCACCCAAGGAGCCGCCCCTGCTCCTAGAGACTCTGGGCACCACTGATAAGGGTGGGTACCAGGAACTCCACCCTTTACCGAGAAAGGCAGGCTGGTTTATCGCCACTCAGACCCAGCCAGCAACCACCCTGGGGAGTGTGTCAGCCACCAGGAGCATCGCTGTTGGGGAGTGGGTTGGGG	030	regLM	85	0.364567	8.08229	0.905058	0.200625	8.08245	1.6588
gen_1172	CATTCCATTCCATTCCATTCTGCATTCTGTTCCATTCTCCATTCCATTCCATTCTCCATACCATCCTCCATTCCATTACACTGCATTCCATTCTCCATTATATTTTATTCACCACGGCATTCCATTACATTTTCCATTCCATTCTATTCTCCATTCCATTCCATTCTCCATTCCATTCCATATTCTATTCCTTTCTCCAT	030	regLM	91	-0.843182	-0.424887	3.53913	-0.40245	-0.424885	-0.79961
gen_1173	GTTTAGCGTAAGAATCAGGGTCCAGCTGGTGCTCCCTAAACAGCAGCTGCTGTTCACTGTTGAAAGGCGCTCTGGAAGGCCAGGTGCGGTGGCTCATGCTTGTAATCCCAGCACTGTGGGAGGCCGAGGTGGGCGGATCACCTGAGGTAAGGAGTTCGAGACCAGCCTGACCAACTTGGAGAAACCGGATCGTCCCAGCT	030	regLM	65	0.189177	2.43513	2.89347	0.284078	2.43506	0.675318
gen_1174	CCAGTAATGGGATGGCTGGGTCCAATGGTATTTCTAGTTCTAGATCCCTGAGGAATTGCCACACTGACTTCCACAATGGTTGAACTAGTTTACAGTCCCACCAACAGTGTAAAATTATTCCTATTTCTCCACATCCTCTCCAGCACCTGTTGTTTCCTGCCTTTTTTTGTCTCTACCTTGCCGTGGCATGACATTCTCCT	030	regLM	21	-0.285971	-0.0261385	-0.370364	0.133344	-0.0261395	-0.165641
gen_1175	TACTTTAAGTTTTAGGGTACATGTGCACATTGTGCAGGTTAGTTACATATGTATACATGTGCCATGCTGGTGTGCTGCACCCATTAACTCGTCATTTAGCATTAGGTATATCTCCTAATGCTATCCCTCCCCCCTCCCCCCACCCCACAACAGTCCCCAGAGTGTGATGTTCCCCTTCCTGTGTCCATGTGTTCTCATTG	030	regLM	97	0.225307	1.86978	-0.106617	0.913333	1.87031	0.00277077
gen_1176	AGAATTGGAAGGAGCTTAGGGGAAAGCTAGCCTCAGGTCAGAATTGCCTGCATGCCACTCGGCTGGCTAGTGAGCTGCTGAATCACCTTATTCCTGGAGAAAGACTTTGATACTGAGAAAACTGACTTGCTCAGCTCTTGCTACAACTGTGACCATCTCTGCAACAGTTTTCTGTTGTTTAAAAGGAAGTCCATCCTGAG	030	regLM	95	0.315045	1.22071	0.753064	0.125858	1.22057	0.652314
gen_1177	GATTTTTCTACTGCTAGGTTTTCCTTTTGGGGTTACGATTATTACAGGTGGCAATCAGTTAACTTAGTGGTTCTGTAGGCACCGCCCTATCTTCCAACTCACTTACATTTAAAAATTCACACAGAGAGGCTAGTGGGAAGCGGGTAGGTGTAAACAATGTGCTACAGTGAGTCACACCCGTCACAGGAGCTCGCTTATCT	030	regLM	98	3.07051	5.00532	0.234437	3.75092	5.00528	1.15791
gen_1178	CCTGAGAAAGGCTTCAACTAAAGAGCTATGGACAGGGACACTCTGTCACTTCCTGGGATTTTGACCCCCAGCTGTCCAACAGAGGAGGGTCTGTGCCTTCGCTCATTAGCCTAACTTAGATGATAGGTGACAAACTGAAGTGAGCTATGGGGAGAGGTTGCCACAACCTCAGCTTTCCAGAGACCGTGGGTGGGTCAATC	030	regLM	23	0.268932	0.413168	-0.294967	-0.109739	0.413174	-0.458579
gen_1179	CCTGAGAAAGGCTTCAACTAAAGAGCTATGGACAGGGACACTCTGTCACTTCCTGGGATTTTGACCCCCAGCTGTCCAACAGAGGAGGGTCTGTGCCTTTGCTCATTAGCCTAACTTAGATGATAGGTGACAAACTGAAATGAGCTATAGGGAGTTGTCCACTTCCAGGCTGCTATCAGTGTGTGAGAGTGGGCACAGAA	030	regLM	13	-0.102303	0.422875	-0.557975	-0.191482	0.422915	-0.663583
gen_1180	CCTCAGAATTAATGGAGAGGGCCAGTGGCGGCCTGTGCCCTTTGTCCCACCGGCCGGCCTGGGGGTGGCGGCTCCAGAATACAGGGTCCTATTGTGTGCCCTGATGTCAGGCAGCTGGACTGCTGGGAGTGAGGATAAACAAGCAGCTGGAGCATCTCGCCTGAAGCCCCAGGAGAGGGCCAGAGCCCCTGCTGCAGCAG	030	regLM	97	2.99876	0.0708163	1.361	2.24129	0.0707793	1.41172
gen_1181	TCTCTGCTCCCCAGAGTCCCTGCACGTGGCTTGACAGTGGCCTTGGTAGGACCCACTGGGGTGTTTCTTCGTCGCCCATGGGCCCTCATGCTGTTATCAATTGGAAATGAATCAGAGATTAGGAAGCGGGGGGAGTGGTGGGGGTGTTATCGCCCAGTGCACACAGGTTACCACAGAGGTCACACGGTAGGTGAGCTGCA	030	regLM	21	0.381181	3.04854	-1.18908	0.285907	3.0485	-0.662666
gen_1182	CCTGAGAAAGGCTTCAACTAAAGAGCTATGGACAGGGACACTCTGTCACTTCCTGGGATTTTGACCCCCAGCTGTCCAACAGAGGAGGGTCTGTGCCTTTGCTCATTAGCCTAACTTAGATGATAGGTGACAAACTGAAGTGAGCTATAGGGAGTTGTCCACTTCTGGGCTTATACATATTTCCTAACTGGCTTTTGAGC	030	regLM	15	-0.0462233	0.352401	-0.394075	-0.303727	0.352334	-0.666875
gen_1183	TCTCTGCTCCCCGGAGTCCCTGCACGTGGCTTGACAGTGGCCTTGGTAGGACCCACTGGGGTGTTTCTTCGTCGCCCATGGGCCCTCATGCTGTTATCAGTTGGAAATGAATCAGAGATTAGGAAGCGGGGGGAGTGGTGGGGGTGTTATCGCCCAGTGCACACGGGGTTGGGGGTGACGATTGGAGAGGCTGGTCCACG	030	regLM	20	0.631219	5.46923	-0.354129	0.330544	5.46923	-0.164487
gen_1184	CCAGTAATGGGATGGCTGGGTCCAATGGTATTTCTAGTTCTAGATCCCTGAGGAATTGCCACACTGACTTCCACAATGGTTGAACTAGTTTACAGTCCCGCCAACAGTGTAAAATTATTTCTATTTTTAGATGAGCCTGTCCTATTTCTCCACATCCTCTTCAGTGCCTGTTGTTTCCTGACTTTTTAATGATCACCATT	030	regLM	45	0.0751311	1.42904	1.29723	0.617412	1.42908	3.13347
gen_1185	TCTCTGCTCCCCAGAGTCCCTGCACGTGGCTTGACAGTGGCCTTGGTAGGACCCACTGGGGTGTTTCTTCGTCGCCCATGGGCCCTCATGCTGTTATCAATTGGAAATGAATCAGAGATTAGGAAGCGGGGGGAGTGGTGGGGGTGTTATCGCCCAGTGCACACGGGGCTCTCAGCTAATCTCTGGCGGCGGTTCCTGGA	030	regLM	8	0.21996	5.67711	0.101522	0.4907	5.67714	0.224831
gen_1186	CCCGAATACTGTGCTTTTCCGACGGGCTTAGGAAACGGCACACCAGGATATTATATCCTGCACCTGGCTCGGAGGGTCCTACGTGCACGGAGTCTCGCTGATTGCTAGCACAGAAGTCTGAGATCAAACTGCAAGGCGGCAGCGAGGCTGGGGGAGGGGTGCCCGCCATTGCCCAGGCTTGCTTAGGTAAACCGAACCGG	030	regLM	98	0.829642	-0.0386464	1.18087	1.74545	-0.0386281	0.0783477
gen_1187	GTTTAGCGTAAGAATCAGGGTCCAGCTGGTGCTCCCTAAACAGCAGCTGCTGTTCACTGTTGAAAGGCGCTCTGGAAGGCCAGGTGCGGTGGCTCATGCCTGTAATCCCAGCACTGTGGGAGGCCGAGGTGGGCGGATCACCTGAGGTAAGGAGTTCGAGACCAGCCTGACCAACGTGGAGAAACCCCATCTCTCCTAAA	030	regLM	61	0.120412	2.62339	3.53955	0.346767	2.62327	1.13016
gen_1188	CCTGAGAAAGGCTTCAACTAAAGAGCTATGGACAGGGACACTCTGTCACTTCCTGGGATTTTGACCCCCAGCTGTCCAACAGAGGAGGGTCTGTGCCTTCGCTCATTAGCCTAACTTAGATGATAGGTGACAAACTGAAATGAGCTATAGGGAGTTGTCCACTTCCAGGCTGCTATCAGTATACCAGCTGGGGTGTTGTA	030	regLM	3	-0.165595	1.85523	-0.43843	-0.198754	1.85513	-0.704166
gen_1189	CATGTTGCCTATGGTATTATAAGAATTGAAAGAAGGCCAGGCGCAGTGGCTCACACCTGTAATCCCAGCACTTTGGGAGGCTGAGGCGGGCAGATCACTTGAGGTCAGGAGTTCGAGACCAGCCTGGCCAACATGGTGAAACCCTATCTCTACTAAAAATACAAAAATTAGCCAGGCATGGTGGTGCACACCTGTAATCC	030	regLM	45	-0.217387	3.69914	3.56786	-0.0427988	3.69929	1.25577
gen_1190	CCAGTAATGGGATGGCTGGGTCCAATGGTATTTCTAGTTCTAGATCCCTGAGGAATCGCCACACTGACTTCCACAATGGTTGAACTAGTTTACAGTCCCACCAACAGTGTAAAATTATTCCTATTTCTCCACATCCTCTCCAGCACCTGTTGTTTCCTGCCTTTTTAATGATCACTATTCACATTAGTGTGAGATGGTAT	030	regLM	7	-0.5494	-0.0834057	-0.412395	-0.210104	-0.0833721	-0.360783
gen_1191	CCTGAGAAAGGCTTCAACTAAAGAGCTATGGACAGGGACACTCTGTCACTTCCTGGGATTTTGACCCCCAGCTGTCCAACAGAGGAGGGTCTGTGCCTTCGCTCATTAGCCTAACTTAGATGATAGGTGACAAACTGAAGTGAGCTATGGGGAGAGGTACCTCACTTGACTTCAGAGGGAGTGTCAGGAAGTTGCCTGGT	030	regLM	28	1.02131	1.66955	-0.197823	0.251103	1.66953	-0.157036
gen_1192	ATTAGCATGGAATTTGGACTTTGGAGCCATAATCCTGTTGTCTTCTTTCATTTAAAGAATATGGGCCAGGCGCGGTGGCTCACGTCTGTAATCCCAGCACTTTGGGAGGCCAAGGCGGGTAGATCACGAGGTCAGGAGATCGAGACCATCCTGGCTAACACAGTGAAACCCTGTCTCTACTAAAAATACAAAAAATTAGC	030	regLM	59	0.266157	2.55873	2.899	1.26821	2.55857	3.1698
gen_1193	ACTGGGATTGCTTGGTTGAATGGTAGTTCCATTTTTAGTTCTTTGAGAAATCTCCAAACTGCTTTCCACAGCAGCTTAACTAATTTACATTCCCACCAGCACTGTCTTAAGTGTTTCCTTTTCTCCGCAGCCTTGCCAACATCTGTAATTTTTTGACTTTTTAATGATATTCTTTATGACTGGTGCAGGATGGTATCCCT	030	regLM	54	0.12023	0.422231	0.547074	0.296653	0.422198	0.657935
gen_1194	GTAAAATCCTCACAGCCATCTCTGACGCTGCTAACCACAGGCATTCAGGAACAGTCTTGCTCCAAATCCTGCCTCCTATTTTCATATTTCCTGTGGCGTTTTATAGAAATAGCAGAACAATTGCTCATCCACAGGGGGTAAAGGGAGCAGGATTTTATATAATTAAATTTTTTTTTTTTTGAGACAGAGTCTCACTCTGT	030	regLM	100	1.04507	0.299028	5.56813	2.42365	0.298969	6.04527
gen_1195	CCCGAATACTGTGCTTTTCCGACGGGCTTAGGAAACGGCACACCAGGATATTATATCCCGCACCTGGCTCGGAGGGTCCTACGTGCACGGAGTCTCGCTCATTGCTAGCACAGAAGTCTGAGATCAAACTGCAAGGCGGCAGCGAGGCTGGGGGAGGGGTGCCCGCCATTGCCCAGGCTTGCTTAGGTAAACAGAGCAGC	030	regLM	97	0.903185	0.0377999	1.14799	1.90599	0.0378211	0.0374772
gen_1196	GTTTAGCGTAAGAATCAGGGTCCAGCTGGTGCTCCCTAAACAGCAGCTGCTGTTCACTGTTGAAAGGCGCTCTGGAAGGCCAGGTGCGGTGGCTCATGCTTGTAATCCCAGCACTGTGGGAGGCCGAGGTGGGCGGATCACCTGAGGTAAGGAGTTCGAGACCAGCCTGACCAACGTGGAGAAACCCCATCTCTCCTAAG	030	regLM	62	0.128084	2.46549	3.10287	0.269298	2.4656	0.754645
gen_1197	GTTTAGCGTAAGAATCAGGGTCCAGCTGGTGCTCCCTAAACAGCAGCTGCTGTTCACTGTTGAAAGGCGCTCTGGAAGGCCAGGTGCGGTGGCTCATGCTTGTAATCCCAGCACGGTGGGAGGCTGAGGAGGGTGGATCACCTGAGGTAAGGAGTTCGAGACCAGCCTGACCAACGTGGAGAAACCCCATCTCTCCTAAA	030	regLM	64	-0.106163	1.95908	2.77201	-0.068749	1.95892	0.0782041
gen_1198	GGCTTAGACTGGATGATAGCAATGGAGGTTGGGTGAGGGGCTCAGTTTCTGAAGGCAGAGCCAACAGCATTTTCTGACAGCTTGGATGCTGGGTGAGAGGGGGTGGGGGGTGCTAAGGTTTTGCCTGATCATCTGGAAGGAGGCAGTTGGGATTAGTCACACTGGGGGAAGACTGGAGGAGCTCACATGGTGGACACATC	030	regLM	94	0.879996	3.10331	1.55752	0.423582	3.10313	0.869826
gen_1199	CATGTTGCCTATGGTATTATAAGAATTGAAAGAAGGCCAGGCGCAGTGGCTCACACCTGTAATCCCAGCACTTTGGGAGGCTGAGGCAGGCAGATCACTTGAGGTCAGGAGTTCGAGACCAGCCTGGCCAACATGGTGAAACCCCATCTCTACTAAAAATACAAAAATTAGCCAGGCATGGTGGTGCATGCCTGTAATCC	030	regLM	41	-0.166912	3.70439	2.93527	0.130045	3.70433	1.96555
gen_1200	GATTTTTCTACTGCTAGGTTTTCCTTTTGGGGTTACGATTATTACAGGTGGCAATCAGTTAACTTAGTGGTTCTGTAGGCACCGCCCTATCTTCCAACTCACTTACATTTAAAAATTCACACAGAGAGGCTAGTGGGAAGCGGGTAGGTGTAAACAATGTGCTACAGTGAGGCTTTGCCATTTGCCTCACTTATCTGTAG	030	regLM	98	0.608737	1.75077	0.107862	0.241376	1.75072	0.215529
gen_1201	CATGTTGCCTATGGTATTATAAGAATTGAAAGAAGGCCAGGCGCAGTGGCTCACACCTGTAATCCCAGCACTTTGGGAGGCTGAGGCGGGCAGATCACTTGAGGTCAGGAGTTCGAGACCAGCCTGGCCAACATGGTGAAACCCTGTCTCTACTAAAAATACAAAAATTAGCCAGGCATGGTGGTGCATGCCTGTAATCC	030	regLM	42	-0.132433	3.63107	3.05405	0.192607	3.6312	2.161
gen_1202	ACTGGGATTGCTTGGTTGAATGGTAGTTCCATTTTTAGTTCTTTGAGAAATCTCCAAACTGCTTTCCACAGCAGCTTAACTAATTTACATTCCCACCAGCACTGTCTTAAGTGTTTCCTTTTCTCCGCAGCCTTGCCAACATCTGTAATTTTTTGACTTTTTAATGATGGCCATTCTAACTGGTGTGAGATGGTATCTCA	030	regLM	46	0.0799415	0.93863	0.65284	0.376594	0.938412	0.0191423
gen_1203	ATATTGGTACAGCACATTTGTCGCTATTAATAAACCAGTATCCAGGGCCAGGTGCAGTGGCTCACGCCTGTAATCCCAGCACTTTGGGAGGCCGAGGCAGGTGGATCACCTGAGGTCAGGAGTTCGAGACCAGCCTGACCAACATGGGAAAACCCTGTCTCTACTAAAAATACAAAATTAGCTGGGCTTGGTGGTGCATT	030	regLM	48	-0.296815	3.18077	3.33741	-0.0397703	3.18066	0.776771
gen_1204	TCTCTGCTCCCCAGAGTCCCTGCACGTGGCTTGACAGTGGCCTTGGTAGGACCCACTGGGGTGTTTCTTCGTCGCCCATGGGCCCTCATGCTGTTATCAGTTGGAAATGAATCAGAGATTAGGAAGCGGGGGGAGTGGTGGGGGTGTTATCGCCCAGTGCACACAGGGTCCCATTCATTCCGGGAAAGCCAGGTCACTTA	030	regLM	21	2.65476	6.29041	0.0359449	2.02126	6.29038	0.830526
gen_1205	CATTCCATTCCATTCCATTCTGCATTCTGTTCCATTCTCCATTCCATTCCATTCTCCATACCATCCTCCATTCCATTACACTGCATTCCATTCTCCATTATATTTTATTCACCACGGCATTCCATTACATTTTCCATTCCATTCTATTCTCCATTCCATTCCATATTCTATTCCTTTCTCCATTCCATTCCCCATTCCAT	030	regLM	90	-1.00661	-0.44602	3.54531	-0.375752	-0.446056	-0.87684
gen_1206	CCTGAGAAAGGCTTCAACTAAAGAGCTATGGACAGGGACACTCTGTCACTTCCTGGGATTTTGACCCCCAGCTGTCCAACAGAGGAGGGTCTGTGCCTTCGCTCATTAGCCTAACTTAGATGATAGGTGACAAACTGAAGTGAGCTATGGGGAGAGGTTGCCACAACCTCAGCTTTCCCAAAGTGTGTCGTTTTCAGACC	030	regLM	28	0.020917	-0.0059079	-0.356462	-0.145601	-0.00588144	-0.580156
gen_1207	CTGGCTGTTTCCTGACTTTTTAATGATCGCCATTCTAACTGGTGGGAGATGGTATCTCATTGTGGTTTTGATTTGCATTTCTCTGATGGCCAGTGATGATGAGCATTTTTTCATGTGTCTCTTGGCTGCATAAATGTCTTCTTTTGAGAAGAGTCCCAGCACCATCTGTCAATTATGCTGCTCAGGAAGACCTCAGGAAA	030	regLM	41	-0.0729058	0.279589	-0.0309339	0.307213	0.279511	-0.074811
gen_1208	AGAATTGGAAGGAGCTTAGGGGAAAGCTAGCCTCAGGTCAGAATTGCCTGCATGCCACTCGGCTGGCTAGTGAGCTGCTGAATCACCTTATTCCTGGAGAAAGACTTTGATACTGAGAAAACTGACTTGCTCAGCTCTTGCTACAACTGTGACCATCTCTGCAACAGTTTTCTGTTATTTTAGCAGTTTTTTCTTTGACA	030	regLM	96	0.181943	0.876158	0.837917	0.155815	0.876036	0.607149
gen_1209	CCTGAGAAAGGCTTCAACTAAAGAGCTATGGACAGGGACACTCTGTCACTTCCTGGGATTTTGACCCCCAGCTGTCCAACAGAGGAGGGTCTGTGCCTTCGCTCATTAGCCTAACTTAGATGATAGGTGACAAACTGAAGTGAGCTATGGGAATGGTTATGGCCAATTTGACCTCTGTGTTCCCTGAAAAAAATAAAAAT	030	regLM	31	-0.101184	0.00549319	-0.355689	-0.272797	0.00552114	-0.509763
gen_1210	CTAGCTGTACCAGCCGCTGCCCCGGACCTGCTGCCCTGCCCCACGCACCCCCCCTCCCCTGGCCAGCCTCCCCAGAGGCCAGAAGGCGCCTTATCGGGCAGGATTAAGGAGGGGGACAGTTATCAGGGGCTGCAGCCTAGGTTGGGCCACAATGTCCTCGTCTCTTGAGGGTGGCAGGCTGTGCAGGCTCCCTGATAAAA	030	regLM	6	0.0149869	5.37219	0.514431	0.286208	5.37216	0.483977
gen_1211	AGAATTGGAAGGAGCTTAGGGGAAAGCTAGCCTCAGGTCAGAATTGCCTGCATGCCACTCGGCTAGTGAGCTGCTGAATCACCTTATTCCTGGAGAAAGACTTTGATACTGAGAAAACTGACTTGCTCAGCTCTTGCTACAACTGTGACCATCTCTGCAACAGTAAAGTAAAAACAAATACCTCTCTTGTTGGGTAATGT	030	regLM	93	0.282849	1.10191	0.207733	0.147557	1.10197	0.539222
gen_1212	CATTCCATTCCATTCCATTCTGCATTCTGTTCCATTCTCCATTCCATTCCATTCTCCATACCATCCTCCATTCCATTACACTGCATTCCATTCTCCATTATATTTTATTCACCACGGCATTCCATTACATTTTCCATTCCATTCTCCATTCCATTCCATTCTCCATTCCATTCCATATTCTATTCCTTTCTCCATTCCAT	030	regLM	90	-0.865218	-0.396348	3.75493	-0.368701	-0.396409	-0.804193
gen_1213	TCTCTGCTCCCCGGAGTCCCTGCACGTGGCTTGACAGTGGCCTTGGTAGGACCCACTGGGGTGTTTCTTCGTCGCCCATGGGCCCTCATGCTGTTATCAATTGGAAATGAATCAGAGATTAGGAAGCGGGGGGAGTGGTGGGGGTGTTATCGCCCAGTGCACACAGGTTACCACAGATGGAATGAGGGAATGTGGAAACC	030	regLM	22	0.354703	2.27554	-0.955314	0.100162	2.27534	-0.4785
gen_1214	TCTCTGCTCCCCAGAGTCCCTGCACGTGGCTTGACAGTGGCCTTGGTAGGACCCACTGGGGTGTTTCTTCGTCGCCCATGGGCCCTCATGCTGTTATCAATTGGAAATGAATCAGAGATTAGGAAGCGGGGGGAGTGGTGGGGGTGTTATCGCCCAGTGCACACAGGTTACCACAGACGTTTAACAGCAGGCAATCAAGA	030	regLM	23	0.317556	4.59819	-0.811343	0.152958	4.59806	-0.462123
gen_1215	ATTAGCATGGAATTTGGACTTTGGAGCCATAATCCTGTTGTCTTCTTTCATTTAAAGAATATGGGCCGGGCGCAGTGGCTCACGCCTGTAATCCCAGCACTTTGGGAGGCCAAGGCGGGTAGATCACGAGGTCAGGAGATCGAGACCATCCTGGCTAACACAGTGAAACCCTGTCTCTACTAAAAATACAAAAAATTAGC	030	regLM	58	0.298666	2.88008	2.76943	1.2153	2.88035	3.05012
gen_1216	TGCACCCCCCCATCATTTTCTTCATTTGTATAATGAGGCTAATACCATGTGTACAACACCGCCGAAATGTACTGGCAGCTCCATATTTCCTTCTCTTATCTCATATTCATCTTTCCACATCTCCCATGAGAGTTTCTCAAGCTGATTAAATTCCTATCCAACATATGTCAGATACATAATTTCAAAAAACAAGGTCATAT	030	regLM	96	-0.142806	0.132725	1.29701	0.0323469	0.132703	-0.484048
gen_1217	TCATTTGAAGATGGAGGCAGAGATTGGAGTGATACAACTATAAGTCAGGGAATGCCAAGGACTTGAGGTCATGTGTTACAGAAGCCCTAGGAAATGAGTCAATTTCCTGGCACAGCACTAAGACATGCTGGTATTCTTCATTCCATCCCTTTCCCCTATTCCTAAATGTGCTCCAGGGACAATGGGGAAGCTGGAGCACT	030	regLM	95	0.672942	0.019109	5.83228	3.44816	0.0191224	6.56348
gen_1218	TCTCTGCTCCCCAGAGTCCCTGCACGTGGCTTGACAGTGGCCTTGGTAGGACCCACTGGGGTGTTTCTTCGTCGCCCATGGGCCCTCATGCTGTTATCAGTTGGAAATGAATCAGAGATTAGGAAGCGGGGGGAGTGGTGGGGGTGTTATCGCCCAGTGCACACAGGTTACCACAGACGTTTATCAGTTCCTCCTTCAGA	030	regLM	22	0.746733	5.79256	-0.876088	1.01259	5.79257	-0.38699
gen_1219	CTCTCTATTACATTCCATTCTCCATTCCATTCCCATACATTCTCCACTCCACTGCATTCTCTATTCCATTCTCCATTCCATTCCACTCCATTCTCCATTCCATTCCATTCTCCATTCCATTCCATTCTCCATTACATTCCATTCTCCCGTCCATTTTTCACTCCATTCCATTCCATTCTCCATTACATTCCATTCTATTC	030	regLM	86	-0.741738	-0.259061	3.21019	-0.301213	-0.259081	-0.763385
gen_1220	ATTAGCATGGAATTTGGACTTTGGAGCCATAATCCTGTTGTCTTCTTTCATTTAAAGAATATGGGCCAGGCGCGGTGGCTCACGCCTGTAATCCCAGCACTTTGGGAGGCCGAGACAGGTGGATCACGAGGTCAGGAGATCGAGACCATCCTGGCTAACACAGTGAAACCCTGTCTCTACTAAAAATACAAAAAAATTAG	030	regLM	60	0.039498	2.65057	1.42446	0.762322	2.65059	1.76417
gen_1221	CCTGAGAAAGGCTTCAACTAAAGAGCTATGGACAGGGACACTCTGTCACTTCCTGGGATTTTGACCCCCAGCTGTCCAACAGAGGAGGGTCTGTGCCTTTGCTCATTAGCCTAACTTAGATGATAGGTGACAAACTGAAGTGAGCTATAGGGAGTTGTCCACTTCCAGGCTGCTGTCTTGGCTACAGCGGTAAAACTGCC	030	regLM	15	0.168556	0.424584	-0.381876	-0.148373	0.424589	-0.66981
gen_1222	GATTTTTCTACTGCTAGGTTTTCCTTTTGGGGTTACGATTATTACAGGTGGCAATCAGTTAACTTAGTGGTTCTGTAGGCACCGCCCTATCTTCCAACTCACTTACATTTAAAAATTCACACAGAGAGGCTAGTGGGAAGCGGGTAGGTGTAAACAATGTGCTACAGTGAGTCACACCCGTCACAAAAGCCAATAATCTC	030	regLM	100	2.45889	3.74147	0.2456	2.57044	3.74164	0.918507
gen_1223	CTCAGAATTAATGGAGAGGGCCAGTGGCGGCCTGTGCCCTTTGTCCCACTGGCCGGCCTGGGGGTGGCGGCTCCAGAATACAGGGTCCTATTGTGTGCCCTGATGTCAGGCAGCTGGACTGCTGGGAGTGAGGATAAACAAGCAGCTGGAGCATCTCGCCTGAAGCCCCAGGAGAGGGCCAGAGCCCCTGCAGCAGGAGG	030	regLM	97	2.93271	0.0350484	1.37857	2.30804	0.0350762	1.23621
gen_1224	CCAGTAATGGGATGGCTGGATCAAATGGTATTTCTAGTTCTAGATCCCTGAGGAATCGCCACACTGACTTCCACAATGGTTGAACTAGTTTACAGTCCCACCAACAGTGTAAAATTATTCCTATTTCTCCACATCCTCTCCAGCACCTGTTGTTTCCTGCCTTTTTAATGATCACCATTCTAACTGGTGTGAGATGGTAT	030	regLM	2	-0.585656	0.00221426	-0.498723	-0.158116	0.00216628	-0.47074
gen_1225	GATTTTTCTACTGCTAGGTTTTCCTTTTGGGGTTACGATTATTACAGGTGGCAATCAGTTAACTTAGTGGTTCTGTAGGCACCGCCCTATCTTCCAACTCACTTACATTTAAAAATTCACACAGAGAGGCTAGTGGGAAGCGGGTAGGTGTAAACAATGTGCTACAGTGAGAAATAGTACAGCCACTCACCAGTAAGTTA	030	regLM	100	0.605329	1.6418	0.398985	0.280313	1.64187	0.330825
gen_1226	TCTCTGCTCCCCGGAGTCCCTGCACGTGGCTTGACAGTGGCCTTGGTAGGACCCACTGGGGTGTTTCTTCGTCGCCCATGGGCCCTCATGCTGTTATCAGTTGGAAATGAATCAGAGATTAGGAAGCGGGGGGAGTGGTGGGGGTGTTATCGCCCAGTGCACACGGGGCTCTCAGGCCTGCCCCACCCCAGGGTGACCCC	030	regLM	18	0.939415	6.08009	0.181663	1.02663	6.08012	0.167511
gen_1227	GATGGGTGCCTCTCCATGGAGCTCACATGTCATACTGCGCCCTGACTCATCACATGTCATTGTTCCTTTGTATTAATTTTCTGTCATCTACAGTGAGTTCCTTGAGGGCAGGGAAAGGGCTTTTTATCTCTGCATTACCAGAGCCCAACAGATACACACTGGTTCTTATTAGTCTATTTTAAGACAGAGTCTCGCTCTGT	030	regLM	21	0.112368	6.05813	0.395277	0.356948	6.05808	0.648805
gen_1228	TCTCACCACTCCTATTCAACATAGTGTTGGAAGTTCTGGACAGGGCAATCAGGCAAGAGAAAGAAAGAAATAAAGGGTATTCAAATAGGAAAAGAGGAAATCAAATTGTCCCTGTTTGCAGATGACATGATTGTATATCTGGAAAGTCCCATCGTCTCAGCCCAAAATCTCCTTAAGCTGATAAGCAACTTCAGCAAAAT	030	regLM	2	-0.403354	3.78041	-0.308792	0.0144561	3.78045	-0.129556
gen_1229	GTTTAGCGTAAGAATCAGGGTCCAGCTGGTGCTCCCTAAACAGCAGCTGCTGTTCACTGTTGAAAGGCGCTCTGGAAGGCCAGGTGCGGTGGCTCATGCTTGTAATCCCAGCACTGTGGGAGGCCGAGGTGGGCGGATCACCTGAGGTAAGGAGTTCGAGACCAGCCTGACCAACGTGGAGAAACCCCATCTCTCCCTAA	030	regLM	62	0.132021	2.48853	3.01388	0.275328	2.48849	0.814313
gen_1230	CTCTCTATTACATTCCATTCTCCATTCCATTCCATTCTCCATTCCATTCCATTCTCCATTCCATTCCACTCCATTCTCCATTCCATTCCATTCTCCATTCCATTCCATTCTCCATTACATTCCATTCTCCATTACATTCCATTCTCCATTACATTCCATTCTCCATTACATTCCATTCTCCATTCCATTCCCCTTTCCAT	030	regLM	89	-0.57847	-0.147907	3.94935	-0.207354	-0.147925	0.420902
gen_1231	TCTCTGCTCCCCAGAGTCCCTGCACGTGGCTTGACAGTGGCCTTGGTAGGACCCACTGGGGTGTTTCTTCGTCGCCCATGGGCCCTCATGCTGTTATCAGTTGGAAATGAATCAGAGATTAGGAAGCGGGGGGAGTGGTGGGGGTGTTATCGCCCAGTGCACACAGGGTCCCATTGGAGCTTGTACTTTGGTAAGTGTCC	030	regLM	21	1.06986	5.25106	-0.545819	0.250677	5.25098	-0.164449
gen_1232	GATTTTTCTACTGCTAGGTTTTCCTTTTGGGGTTACGATTATTACAGGTGGCAATCAGTTAACTTAGTGGTTCTGTAGGCACCGCCCTATCTTCCAACTCACTTACATTTAAAAATTCACACAGAGAGGCTAGTGGGAAGCGGGTAGGTGTAAACAATGTGCTACAGTGAGATAACAGCCTACCATAACCAGGCAGTTTC	030	regLM	98	0.924116	5.97071	0.0735224	1.13654	5.97078	0.448128
gen_1233	CCTGAGAAAGGCTTCAACTAAAGAGCTATGGACAGGGACACTCTGTCACTTCCTGGGATTTTGACCCCCAGCTGTCCAACAGAGGAGGGTCTGTGCCTTTGCTCATTAGCCTAACTTAGATGATAGGTGACAAACTGAAATAAAGATATGCTCTGAGACAGAGGCAGAAAAATAAATGTATGTAATTCCAGCACGGGAGG	030	regLM	36	-0.160119	0.147171	-0.213488	-0.397404	0.147241	-0.491676
gen_1234	TCTCTGCTCCCCAGAGTCCCTGCACGTGGCTTGACAGTGGCCTTGGTAGGACCCACTGGGGTGTTTCTTCGTCGCCCATGGGCCCTCATGCTGTTATCAATTGGAAATGAATCAGAGATTAGGAAGCGGGGGGAGTGGTGGGGGTGTTATCGCCCAGTGCACACAGGTTACCACAGACGTTTAACAGCAGCAGGTTTGAT	030	regLM	21	0.266453	4.25998	-0.950394	0.0687397	4.26014	-0.580297
gen_1235	CTCAGAATTAATGGAGAGGGCCAGTGGCGGCCTGTGCCCTTTGTCCCACTGGCCGGCCTGGGGGTGGCGGCTCCAGAATACAGGGTCCTATTGTGTGCCCTGATGTCAGGCAGCTGGACTGCTGGGAGTGAGGATAAACAAGCAGCTGGAGCATCTCGCCTGAAGCCCCAGGAGAGGGCCAGAGCCCCTGAAGAAGCATC	030	regLM	98	2.59173	0.0470015	1.27315	2.18831	0.0471132	1.25732
gen_1236	GTTTAGCGTAAGAATCAGGGTCCAGCTGGTGCTCCCTAAACAGCAGCTGCTGTTCACTGTTGAAAGGCGCTCTGGAAGGCCAGGTGCGGTGGCTCATGCTTGTAATCCCAGCACTGTGGGAGGCCGAGGTGGGCGGATCACCTGAGGTAAGGAGTTCGAGACCAGCCTGACCAACGTGGAGAAACCCCATCTCTCCTGAA	030	regLM	62	0.118973	2.42804	3.12967	0.264446	2.42814	0.717345
gen_1237	CCAGTAATGGGATGGCTGGGTCCAATGGTATTTCTAGTTCTAGATCCCTGAGGAATTGCCACACTGACTTCCACAATGGTTGAACTAGTTTACAGTCCCGCCAACAGTGTAAAATTATTCCTATTTCTCCACATCCTCTCCAGCACCTGTTGTTTCCTGACTTTTTAATGATCGCCATTCTAACTGGTGTGAGATAGTAT	030	regLM	6	-0.558377	0.272626	-0.521869	-0.143278	0.272293	-0.499491
gen_1238	ATATTGGTACAGCACATTTGTCGCTATTAATAAACCAGTATCCAGGGCCAGGTGCAGTGGCTCACGCCTGTAATCCCAGCACTTTGGGAGGCCGAGGTGGGTGGATCACCTGAGGTCAGGAGTTCGAGACCAGCCTGACCAACATGGGAAAACCCTGTCTCTACTAAAAATACAAAATTAGCTGGGCTTGGTGGCGCATG	030	regLM	46	-0.173104	3.65483	3.69411	0.210883	3.65439	1.48394
gen_1239	CCCGAATACTGTGCTTTTCCGACGGGCTTAGGAAACGGCACACCAGGATATTATATCCTGCACCTGGCTCGGAGGGTCCTACGTGCACGGAGTCTCGCTCATTGCTAGCACAGAAGTCTGAGATCAAACTGCAAGGCGGCAGCGAGGCTGGGGGAGGGGTGCCCGCCATTGCCCAGGCTTGCTTAGGTAAACCGAACTGG	030	regLM	96	0.78673	-0.0237022	1.36145	1.66568	-0.0236237	0.00535922
gen_1240	CCTGAGAAAGGCTTCAACTAAAGAGCTATGGACAGGGACACTCTGTCACTTCCTGGGATTTTGACCCCCAGCTGTCCAACAGAGGAGGGTCTGTGCCTTTGCTCATTAGCCTAACTTAGATGATAGGTGACAAACTGAAGTGAGCTATAGGGAGTTGTCCACTTCCAGGCTGTTATCCATCCAGCTTGATCTAGATGGGG	030	regLM	13	-0.0475092	0.363333	-0.50128	-0.172651	0.363373	-0.723411
gen_1241	ATTATGATACAGTCCAAGTATGTAACTTTCTGGGGACCAGACTTTGCTGAGAGTCATAATGGAGAGTCAAAGAGTCTGATGGCTGAGAGGGGTGTGCCTGGGCTTGCCTTCATAAATGTTCATTGTCTCAGCCAAGGTTTTGGCAGGAGCGAGAGCAGGCTCAGATCAGTGTCACAGGCAGTACCTTACGTGGCTTGAGA	030	regLM	95	1.55315	0.170362	3.46007	1.35782	0.170343	1.82541
gen_1242	CCTAGAGACTCTGGGCACCACTGATAAGGGTGGGTACCAGGAACTCCACCCTTTACCGAGAAAGGCAGGCTGGTTTATCGCCACTCAGACCCAGCCAGCAACCACCCTGGGGAGTGTGTCAGCCACCAGGAGCATCGCTGTTGGGGAAATGTTATTAACTAGGAAGGAATTTTCCAAATATTGTTTCTCCACTATCTTCT	030	regLM	14	0.0548405	6.81231	0.681524	0.365296	6.81234	1.67956
gen_1243	CCTGAGAAAGGCTTCAACTAAAGAGCTATGGACAGGGACACTCTGTCACTTCCTGGGATTTTGACCCCCAGCTGTCCAACAGAGGAGGGTCTGTGCCTTTGCTCATTAGCCTAACTTAGATGATAGGTGACAAACTGAAGTGAGCTATGGGGAGAGGTACCTCATTTATCTGTTGCTGGGTGTGGCACACAGTCCAGAGC	030	regLM	28	0.0383634	1.56497	-0.837214	-0.168433	1.56492	-0.798778
gen_1244	CCTGAGAAAGGCTTCAACTAAAGAGCTATGGACAGGGACACTCTGTCACTTCCTGGGATTTTGACCCCCAGCTGTCCAACAGAGGAGGGTCTGTGCCTTCGCTCATTAGCCTAACTTAGATGATAGGTGACAAACTGAAGTGAGCTATGGGGAGAGGTTGCCACAACTTAAATGTTATCCGGTTTAACCCACATGTTACT	030	regLM	27	0.154418	0.698715	-0.339014	-0.126779	0.698694	-0.548083
gen_1245	CTCAGAATTAATGGAGAGGGCCAGTGGCGGCCTGTGCCCTTTGTCCCACTGGCCGGCCTGGGGGTGGCGGCTCCAGAATACAGGGTCCTATTGTGTGCCCTGATGTCAGGCAGCTGGACTGCTGGGAGTGAGGATAAACAAGCAGCTGGAGCATCTCGCCTGAAGCCCCAGGAGAGGGCCAGAGAGCTACGGGTCCAGTG	030	regLM	98	2.98809	0.25404	1.52433	2.39345	0.254026	1.3441
gen_1246	CCTGAGAAAGGCTTCAACTAAAGAGCTATGGACAGGGACACTCTGTCACTTCCTGGGATTTTGACCCCCAGCTGTCCAACAGAGGAGGGTCTGTGCCTTTGCTCATTAGCCTAACTTAGATGATAGGTGACAAACTGAAGTGAGCTATGGGGAGAGGTACCTCATTTATCTGTTGCTGGGTGTGGCAGGGCCTCTGGGCA	030	regLM	24	0.167107	1.57426	-0.767504	-0.135308	1.57431	-0.763265
gen_1247	AGAAAAAAACAAACAACCCCATCAACAAGTGGGCGAAGGATATGAACAGACACTTCTCAAAAGAAGATATTTATTCAACCAAAAGACACATGAAAAAATTCTCATCATCACTGGCCATCAGAGAAATGCAAATCAAAACCACAATGAGATACCATCTCACACCAGTTAGAATGGCGATCATTGAAAAGTCAGGAAGCAAC	030	regLM	45	-0.467154	1.34367	0.226029	-0.244321	1.3433	-0.328042
gen_1248	TCTCTGCTCCCCAGAGTCCCTGCACGTGGCTTGACAGTGGCCTTGGTAGGACCCACTGGGGTGTTTCTTCGTCGCCCATGGGCCCTCATGCTGTTATCAGTTGGAAATGAATCAGAGATTAGGAAGCGGGGGGAGTGGTGGGGGTGTTATCGCCCAGTGCACACGGGGCTCTCAGCTAATCTCTGGCGGCCCTGCGTCGC	030	regLM	4	0.756279	6.01769	-0.066378	1.12147	6.01767	0.197414
gen_1249	ACTGGGATTGCTTGGTTGAATGGTAGTTCCATTTTTAGTTCTTTGAGAAATCTCCAAACTGCTTTCCACAGCAGCTTAACTAATTTACATTCCCACCAGCACTGTCTTAAGTGTTTCCTTTTCTCCGCAGCCTTGCCAACATCTGTAATTTTTTGACTTTTTAATGATATTCTTTATGGCTGCTGTAATTTCTGAAGGAA	030	regLM	62	0.0838463	0.410355	0.817498	0.298511	0.410319	0.840287
gen_1250	CTGTTTGTGCTGTGTGTTTCCAATAATTGACAACATATGTGATTTTGTTATTCTACACTGAGCTTGCTTCGTCTGCATATTCATTAAAAAAGAATTTTTAAAATCTTTGTCAGATGTTCTACATCTGAATCATCTTCTAGTATTAAACCACAGCCAAGAACTTTTATATCTTTTATCACATTAACATAAAGATTCATGGA	030	regLM	95	-0.262984	-0.650765	3.36771	0.434592	-0.650794	1.62022
gen_1251	GATTTTTCTACTGCTAGGTTTTCCTTTTGGGGTTACGATTATTACAGGTGGCAATCAGTTAACTTAGTGGTTCTGTAGGCACCGCCCTATCTTCCAACTCACTTACATTTAAAAATTCACACAGAGAGGCTAGTGGGAAGCGGGTAGGTGTAAACAATGTGCTACAGTGACACATGGTAAGTGCTCACTAAAGGCCAGGC	030	regLM	99	0.647078	1.70599	0.151787	0.459214	1.70593	0.126782
gen_1252	CCAGTAATGGGATGGCTGGGTCCAATGGTATTTCTAGTTCTAGATCCCTGAGGAATTGCCACACTGACTTCCACAATGGTTGAACTAGTTTACAGTCCCGCCAACAGTGTAAAATTATTCCTATTTCTCCACATCCTCTCCAGCATCTGTTGTTTCCTGCCTTTTTAATGATCGCCATTCTAACTGGTGTGAGATGGTAT	030	regLM	5	-0.506038	0.82261	-0.362777	0.124056	0.822927	-0.284265
gen_1253	CTCAGAATTAATGGAGAGGGCCAGTGGCGGCCTGTGCCCTTTGTCCCACCGGCCGGCCTGGGGGTGGCGGCTCCAGAATACAGGGTCCTATTGTGTGCCCTGATGTCAGGCAGCTGGACTGCTGGGAGTGAGGATAAACAAGCAGCTGGAGCATCTCGCCTGAAGCCCCAGGAGAGGGCCAAGGGGACAGCTGCAGCAGC	030	regLM	100	2.32044	0.0190284	1.00329	1.78354	0.0190396	0.827109
gen_1254	GTTTAGCGTAAGAATCAGGGTCCAGCTGGTGCTCCCTAAACAGCAGCTGCTGTTCACTGTTGAAAGGCGCTCTGGAAGGCCAGGTGCGGTGGCTCATGCTTGTAATCCCAGCACTGTGGGAGGCCGAGGTGGGCGGATCACCTGAGGTAGGGAGTTCGAGACCAGCCTGACCAACGTGGAGAAACCCCATCTCTCCTAAC	030	regLM	63	0.122264	2.48116	3.09208	0.276842	2.48111	0.590476
gen_1255	ATTAGCATGGAATTTGGACTTTGGAGCCATAATCCTGTTGTCTTCTTTCATTTAAAGAATATGGGCCAGGCGCGGTGGCTCACGCCTGTAATCCCAGCACTTTGGGAGGCCAAGGCGGGTAGATCACGAGGTCAGGAGATCGAGACCATCCTGGCTAACACAGTGAAACCCTGTCTCTACTAAAAATACAAAAAATTAGC	030	regLM	58	0.169534	3.14368	2.73098	0.914373	3.14367	2.5971
gen_1256	GTTTAGCGTAAGAATCAGGGTCCAGCTGGTGCTCCCTAAACAGCAGCTGCTGTTCACTGTTGAAAGGCGCTCTGGAAGGCCAGGCGCGGTGGCTCATGCTTGTAATCCCAGCACTGTGGGAAGCGGAGGTGGGCAGATCACCTGAGGTAAGGAGTTCGAGACCAGCCTGACCAACGTGGAGAAACCCCATCTCTCCTAAA	030	regLM	66	-0.023425	2.55591	3.59716	0.189581	2.55577	1.00727
gen_1257	CCATCTGTTCCATCCTCACCCACCCAAGGAGCCGCCCCTGCTCCTAGAGACTCTGGGCACCACTGATAAGGGTGGGTACCAGGAACTCCACCCTTTACCGAGAAAGGCAGGCTGGTTTATCGCCACTCAGACCCAGCCAGCGACCACCCTGGGGAGTGTGTCAGCCACCAGGAGCATCGCTGTTGGGGAATGGGTTGGAA	030	regLM	84	-0.0555681	7.28985	0.496498	-0.0295857	7.28984	1.22457
gen_1258	GTTTAGCGTAAGAATCAGGGTCCAGCTGGTGCTCCCTAAACAGCAGCTGCTGTTCACTGTTGAAAGGCGCTCTGGAAGGCCAGGTGCGGTGGCTCATGCTTGTAATCCCAGCACTGTGGGAGGCCGAGGTGGGCGGATCACCTGAGGTAAGGAGTTCGAGACCAGCCTGACCAACGTGGAGAAACCCCATCTCTGCTAAA	030	regLM	62	0.130965	2.47879	3.16981	0.305171	2.47883	0.757529
gen_1259	CTCAGAATTAATGGAGAGGGCCAGTGGCGGCCTGTGCCCTTTGTCCCACTGGCCGGCCTGGGGGTGGCGGCTCCAGAATACAGGGTCCTATTGTGTGCGCTGATGTCAGGCAGCTGGACTGCTGGGAGTGAGGATAAACAAGCAGCTGGAGCATCTCGCCTGAAGCCCCAGGAGAGGGCCAGAGCCCCTGCAGCAGCAGG	030	regLM	96	3.65367	0.351594	2.34555	2.36928	0.351569	1.54107
gen_1260	CATGAGGAGCGTTTGTAGCAGTCACTGAATCACCTCATGACTAGCGGGGCAAGCCTCTAATTCACCGCAGGATTTCCGGTAGGTTGGATTGTGGGGTTGGTGTTTGCACTCCAAAGAGTTGCTGTGATTTCCCTGTATCTGTCTTTCTGGCTTGTTAGATCTTCTCATTTGGCGTCCTTTCTCCGAAGAGTTGGCCAGGT	030	regLM	101	1.56507	0.405963	3.85064	1.57978	0.405912	1.47878
gen_1261	GAGAAATTCTCAAGGAGGAGGACACAAACAGGACTGGAAGGGGAGCAGGACTGAGCCAAGCGGATGAGAGGAAAGAGGCATTCCAGTCCTCTGGGGAAGCATGGGAGGTAGGAATTCTTGCCACCAGTGGTTTGGACAAACACACAGAGCGGGTCACCGGGTCAGAGCCGAGGGTTAGGACGGGAGAGGAGCAAAGGCCC	030	regLM	99	1.64792	0.482778	0.688164	0.91493	0.483029	0.456322
gen_1262	CCTGAGAAAGGCTTCAACTAAAGAGCTATGGACAGGGACACTCTGTCACTTCCTGGGATTTTGACCCCCAGCTGTCCAACAGAGGAGGGTCTGTGCCTTCGCTCATTAGCCTAACTTAGATGATAGGTGACAAACTGAAGTGAGCTATGGGGAGAGGTACCTCATTTATCAGTTGAAGTGACAGCTGACTTTTTTCTGGG	030	regLM	27	-0.284516	1.6393	-0.466166	-0.26232	1.63921	-0.823728
gen_1263	CCATCTGTTCCATCCTCACCCACCCAAGGAGCCGCCCCTGCTCCTAGAGACTCTGGGCACCACTGATAAGGGTGGGTACCAGGAACTCCACCCTTTACCGAGAAAGGCAGGCTGGTTTATCGCCACTCAGACCCAGCCAGCAACCACCCTGGGGAGTGTGTCAGCCACCAGGAGCATCGCTGTTGGGGAATGGGTTTGGG	030	regLM	84	0.311616	8.0462	0.77173	0.172484	8.04615	1.63126
gen_1264	ATATTGGTACAGCACATTTGTCGCTATTAATAAACCAGTATCCAGGGCCAGGTGCAGTGGCTCACGCCTGTAATCCCAGCACTTTGGGAGGCCGAGGTGGGTGGATCACCTGAGGTCAGGAGTTCGAGACCAGCCTGACCAACATGGGAAAACCCTGTCTCTACTAAAAATACAAAATTAGCTGGGCATGGTGGTGCATG	030	regLM	46	-0.210945	3.19917	3.622	0.180773	3.19928	1.55379
gen_1265	AGAATTGGAAGGAGCTTAGGGGAAAGCTAGCCTCAGGTCAGAATTGCCTGCATGCCACTCGGCTAGTGAGCTGCTGAATCACCTTATTCCTGGAGAAAGATTTTGTTTTTTATTTTATTTTATTTTATTTTATTTTATTTTATTTTATTTTATTTTATTTTATTTTATTTTATTTAATTTAATATATTTTATTTTATTTA	030	regLM	95	0.347325	0.309026	0.64011	0.268077	0.30901	0.986923
gen_1266	TCTCTGCTCCCCAGAGTCCCTGCACGTGGCTTGACAGTGGCCTTGGTAGGACCCACTGGGGTGTTTCTTCGTCGCCCATGGGCCCTCATGCTGTTATCAGTTGGAAATGAATCAGAGATTAGGAAGCGGGGGGAGTGGTGGGGGTGTTATCGCCCAGTGCACACAGGTTACCACAGAGGTCACACGGTAGGTGCTCCCTG	030	regLM	23	0.861645	4.81126	-0.893044	0.743716	4.81131	-0.570127
gen_1267	GTTTAGCGTAAGAATCAGGGTCCAGCTGGTGCTCCCTAAACAGCAGCTGCTGTTCACTGTTGAAAGGCGCTCTGGAAGGCCAGGTGCGGTGGCTCATGCTTGTAATCCCAGCACTGTGGGAGGCCGAGGTGGGCGGATCACCCGAGGTAGGGAGTTCGAGACCAGCCTGACCAACGTGGAGAAACCCCATCTCTCCTAAA	030	regLM	64	0.183398	2.51707	3.62624	0.376664	2.51713	0.927128
gen_1268	CTCAGAATTAATGGAGAGGGCCAGTGGCGGCCTGTGCCCTTTGTCCCACTGGCCGGCCTGGGGGTGGCGGCTCCAGAATACAGGGTCCTATTGTGTGCCCTGATGTCAGGCAGCTGGACTGCTGGGAGTGAGGATAAACAAGCAGCTGGAGCATCTCGCCTGAAGCCCCAGGAGAGGGCCAGAGAGTGAAGCTCACAGGA	030	regLM	101	3.00358	0.267902	1.6458	2.2459	0.26787	1.34748
gen_1269	CCTGAGAAAGGCTTCAACTAAAGAGCTATGGACAGGGACACTCTGTCACTTCCTGGGATTTTGACCCCCAGCTGTCCAACAGAGGAGGGTCTGTGCCTTCGCTCATTAGCCTAACTTAGATGATAGGTGACAAACTGAAGTGAGCTATGGGGAGAGGTTGCCACAACCTCAGCTTTCCAGAGGTGGAACCCTCATGGATA	030	regLM	28	-0.0172345	0.0530736	-0.430354	-0.169202	0.0531653	-0.661429
gen_1270	ATTAGCATGGAATTTGGACTTTGGAGCCATAATCCTGTTGTCTTCTTTCATTTAAAGAATATGGGCCGGGCGCGGTGGCTCACGCCTGTAATCCCAGCACTTTGGGAGGCCAAGGCGGGCAGATCACGAGGTCAGGAGATCGAGACCATCCTGGCTAACACGGTGAAAGCCTGTCTCTACTAAAAATACAAAAAATTAGC	030	regLM	57	0.248689	3.3319	2.14832	1.23493	3.3315	2.88883
gen_1271	CCAGTAATGGGATGGCTGGGTCCAATGGTATTTCTAGTTCTAGATCCCTGAGGAATCGCCACACTGACTTCCACAATGGTTGAACTAGTTTACAGTCCCACCAACAGTGTAAAATTGTTCCTGTTTCTCCACATCCTCTCCAGCACCTGTTGTTTCCTGACTTTTTAATGATCGCCATTCTAACTGGTGTGAGATGGTAT	030	regLM	6	-0.398852	0.712251	-0.459776	-0.0178966	0.712223	-0.434263
gen_1272	TCCTGAATGGGCAAAAACTGGAAGCATTCCCTTTGAAAACTGGCACAAGACGGGGATGCCCTCTCTCACCGCTCCTATTCAACATAGTGTTGGAAGTTCTGGCCAGGGCAATCAGGCAGGAGAAGGAAATAAAGGGTATTCAATTAGGAAAAGAGGAAGTCAAATTGTCCCTGTTTGCAGATGACATGACTGTATATCTA	030	regLM	18	-0.0677714	0.266678	-0.407367	0.4063	0.266708	-0.0307543
gen_1273	AGAAAAAAACAAACAACCCCATCAACAAGTGGGCGAAGGATATGAACAGACACTTCTCAAAAGAAGATATTTATTCAACCAAAAGACACATGAAAAAATACTCATCATCACTGGCCATCAGAGAAATGCAAATCAAAACCACAATGAGATACCATCTCACACCAGTTAGAATGGCGATCATTGAAAAGTCAGGAAGCAAC	030	regLM	44	-0.47124	1.43409	0.171226	-0.228869	1.43418	-0.351686
gen_1274	TTTTGTTCTCTTACATGTTGCCTATGGTATTATAAGAATTGAAAGAAGGCCAGGCGCAGTGGCTCACACCTGTAATCCCAGCACTTTGGGAGGCTGAGGTGGGCAGATCACTTGAGGTCAGGAGTTCGAGACCAGCCTGGCCAACATGGTGAAACCCCATCTCTACTAAAAATACAAAAATTAGCCAGGTGTGGTGGTGC	030	regLM	46	-0.231513	3.55813	2.81224	0.0896823	3.55787	0.911671
gen_1275	TCTCTGCTCCCCGGAGTCCCTGCACGTGGCTTGACAGTGGCCTTGGTAGGACCCACTGGGGTGTTTCTTCGTCGCCCATGGGCCCTCATGCTGTTATCAGTTGGAAATGAATCAGAGATTAGGAAGCGGGGGGAGTGGTGGGGGTGTTATCGCCCAGTGCACACGGGGCTCTCAGCTAATCTCTGGCGGCCCTGCGGGAT	030	regLM	6	0.695132	5.72301	-0.184299	0.80205	5.72304	0.0658754
gen_1276	GATTTTTCTACTGCTAGGTTTTCCTTTTGGGGTTACGATTATTACAGGTGGCAATCAGTTAACTTAGTGGTTCTGTAGGCACCGCCCTATCTTCCAACTCACTTACATTTAAAAATTCACACAGAGAGGCTAGTGGGAAGCGGGTAGGTGTAAACAATGTGCTACAGTGAGAATGAATGGAGAGCCTCCTGGGGGCCACA	030	regLM	101	0.625691	1.88705	0.0065593	0.174581	1.88654	0.354757
gen_1277	GATTTTTCTACTGCTAGGTTTTCCTTTTGGGGTTACGATTATTACAGGTGGCAATCAGTTAACTTAGTGGTTCTGTAGGCACCGCCCTATCTTCCAACTCACTTACATTTAAAAATTCACACAGAGAGGCTAGTGGGAAGCGGGTAGGTGTAAACAATGTGCTACAGTGAGAAACCTGGGGCATTTTCCAAGATGGCAGC	030	regLM	100	2.18403	1.47616	2.49893	2.53886	1.47645	1.62744
gen_1278	CCTCAGAATTAATGGAGAGGGCCAGTGGCGGCCTGTGCCCTTTGTCCCACTGGCCGGCCTGGGGGTGGCGGCTCCAGAATACAGGGTCCTATTGTGTGCCCTGATGTCAGGCAGCTGGACTGCTGGGAGTGAGGATAAACAAGCAGCTGGAGCATCTCGCCTGAAGCCCCAGGAGAGGGCCAGAGCCCCTGCAGCAGCTG	030	regLM	96	3.00311	0.153404	1.54305	2.36643	0.153397	1.276
gen_1279	CCTGAGAAAGGCTTCAACTAAAGAGCTATGGACAGGGACACTCTGTCACTTCCTGGGATTTTGACCCCCAGCTGTCCAACAGAGGAGGGTCTGTGCCTTTGCTCATTAGCCTAACTTAGATGATAGGTGACAAACTGAAGTGAGCTATGGGGAGAGGCACCCCTATCCTCATGGGATTAGAGGGTTGGGACTGAGATCCC	030	regLM	28	0.020859	0.310333	-0.245852	-0.105384	0.310358	-0.657423
gen_1280	ATTATGATACAGTCCAAGTATGTAACTTTCTGGGGACCAGACTTTGCTGAGAGTCATAATGGAGAGTCAAAGAGTCTGATGGCTGAGAGGGATGTGCCTGGGCTTGCCTTCATAAATGTTCATTGTCTCAGCCAAGGTTTTGGCAGGAGCGAGAACAGCCTCTGGTAGGAGCTGGGGTCACAGGAGGCAATGTCAGGGTT	030	regLM	97	2.04438	0.0428994	5.94496	2.52118	0.0428904	4.30113
gen_1281	ACTGGGATTGCTTGGTTGAATGGTAGTTCCATTTTTAGTTCTTTGAGAAATCTCCAAACTGCTTTCCACAGCAGCTTAACTAATTTACATTCCCACCAGCACTGTCTTAAGTGTTTCCTTTTCTCCGCAGCCTTGCCAACATCTGTAATTTTTTGACTTTTTAATGATATTCTTTATGACTGGTGCAAGATAGTATCCCA	030	regLM	54	-0.0549907	0.56194	0.492211	0.169138	0.562074	0.33454
gen_1282	CTCAGAATTAATGGAGAGGGCCAGTGGCGGCCTGTGCCCTTTGTCCCACCGGCCGGCCTGGGGGTGGCGGCTCCAGAATACAGGGTCCTATTGTGTGCCCTGATGTCAGGCAGCTGGACTGCTGGGAGTGAGGATAAACAAGCAGCTGGAGCATCTCGCCTGAAGCCCCAGGAGAGGGCCAGAGCCCCTGAAGAGTGAGG	030	regLM	100	2.85945	0.00884821	1.18735	2.13331	0.00880987	1.16696
gen_1283	GTTTAGCGTAAGAATCAGGGTCCAGCTGGTGCTCCCTAAACAGCAGCTGCTGTTCACTGTTGAAAGGCGCTCTGGAAGGCCAGGTGCGGTGGCTCATGCTTGTAATCCCAGCACTTTGGGAGGCCGAGGTGGGCGGATCACCTGAGGTAAGGAGTTCGAGACCAGCCTGACCAACGTGGAGAAACCCCATCTCTCCTAAA	030	regLM	61	-0.00144265	2.97183	3.31253	0.145549	2.97193	1.27965
gen_1284	GTTTAGCGTAAGAATCAGGGTCCAGCTGGTGCTCCCTAAACAGCAGCTGCTGTTCACTGTTGAAAGGCGCTCTGGAAGGCCAGGTGCGGTGGCTCATGCTTGTAATCCCAGCACTGTGGGAGGCCGAGGTGGGCGGATCACCTGAGGTAAGGAGTTCGAGACCAGCCTGACCAACGTGGAGAAACCCCATCTCTACTGAA	030	regLM	62	0.126462	2.50841	3.20562	0.324242	2.50847	0.850348
gen_1285	TCTCTGCTCCCCGGAGTCCCTGCACGTGGCTTGACAGTGGCCTTGGTAGGACCCACTGGGGTGTTTCTTCGTCGCCCATGGGCCCTCATGCTGTTATCAGTTGGAAATGAATCAGAGATTAGGAAGCGGGGGGAGTGGTGGGGGTGTTATCGCCCAGTGCACACAGGTTACCACAGACATTTAGCCCTCGAGGGGGCAGA	030	regLM	22	0.923007	5.09181	-0.473867	0.429811	5.0918	-0.238931
gen_1286	CTAGCTGTACCAGCCGCTGCCCCGGACCTGCTGCCCTGCCCCACCCCCCCCTCCCCTGGCCAGCCTCCCCAGAGGCCAGAAGGCGCCTTATCGGGCAGGATTAAGGAGGGGGACAGTTATCAGGGGCTGCAGCCTAGGTTGGGCCACAATGTCCTCGTCTCTTGAGGGTGGCAGGCTGTGCAGGCTCCCTGACAGGGGCC	030	regLM	5	0.0816375	5.16492	0.457912	0.296973	5.16489	0.498492
gen_1287	CCATCTGTTCCATCCTCACCCACCCAAGGAGCCGCCCCTGCTCCTAGAGACTCTGGGCACCACTGATAAGGGTGGGTACCAGGAACTCCACCCTTTACCGAGAAAGGCAGGCTGGTTTATCGCCACTCAGACCCAGCCAGCAGCCACCCTGGGGAGTGTGTCAGCCACCAGGAGCATCGCTGTTGGGGAAATGTTATCTC	030	regLM	85	0.576152	8.21095	0.696561	0.754656	8.21091	1.7261
gen_1288	TCTCTGCTCCCCGGAGTCCCTGCACGTGGCTTGACAGTGGCCTTGGTAGGACCCACTGGGGTGTTTCTTCGTCGCCCATGGGCCCTCATGCTGTTATCAATTGGAAATGAATCAGAGATTAGGAAGCGGGGGGAGTGGTGGGGGTGTTATCGCCCAGTGCACACAGGTTACCACAGAGGTCACACGGTAGGTGAGGGGAA	030	regLM	22	0.324831	3.51328	-1.18169	0.287953	3.51355	-0.627405
gen_1289	ACTGGGATTGCTTGGTTGAATGGTAGTTCCATTTTTAGTTCTTTGAGAAATCTCCAAACTGCTTTCCACAGCAGCTTAACTAATTTACATTCCCACCAACAGTGTAAAAGTGTTCCTATTTCTCCACATCCTCTCCAGCATCTGTTGTTTCCTGACTTTTTAATGATCACTATTCTAACTGGTGTGAGATGGTATCTCAT	030	regLM	29	-0.492992	1.60752	-0.18472	-0.0966444	1.60659	-0.302446
gen_1290	CAAATCAATTAAGCTAAAATAAATCAAAGTTGGAACAAAGCCACCAATATAATGTTAAAAAGTATTCAAATGTAAAACCAATTGAGCCAAAAATAGCATGATGATGTAACCATTTGGAATGAGCATTTATGAGGCTTTAAATCATTTTTATATTACTATTTTAAGGATCAGCACTGCCAGCACTGCAAACTTAAACTCAG	030	regLM	92	0.774108	0.414713	3.01892	0.509424	0.414804	3.69635
gen_1291	AGAATTGGAAGGAGCTTAGGGGAAAGCTAGCCTCAGGTCAGAATTGCCTGCATGCCACTCGGCTGGCTAGTGAGCTGCTGAATCACCTTATTCCTGGAGAAAGACTTTGATACTGAGAAAACTGACTTGCTCAGCTCTTGCTACAACTGTGACCATCTCTGCAACAGTAAAGTCAGTCCTTTCTATGTTCAGAAGCTGTT	030	regLM	91	0.17806	1.2603	0.444827	0.106502	1.26024	0.591413
gen_1292	TCTCTGCTCCCCGGAGTCCCTGCACGTGGCTTGACAGTGGCCTTGGTAGGACCCACTGGGGTGTTTCTTCGTCGCCCATGGGCCCTCATGCTGTTATCAATTGGAAATGAATCAGAGATTAGGAAGCGGGGGGAGTGGTGGGGGTGTTATCGCCCAGTGCACACAGGTTACCACAGATGGAATGAGGGAATGTAGACACC	030	regLM	23	0.26399	3.06178	-0.925036	0.0427657	3.06178	-0.505833
gen_1293	GTTTAGCGTAAGAATCAGGGTCCAGCTGGTGCTCCCTAAACAGCAGCTGCTGTTCACTGTTGAAAGGCGCTCTGGAAGGCCAGGTGCGGTGGCTCATGCTTGTAATCCCAGCACTGTGGGAGGCCGAGGTGGGCGGATCACCTGAGGTAAGGAGTTCGAGACCAGCCTGACCAACGTGGAGAAACCCCATCCCTACTAAA	030	regLM	63	0.144845	2.43452	3.04155	0.311213	2.43446	0.765029
gen_1294	CAGAATTTTAAGCGGCTCAATTTACTTTCGTGTTATTTTTAATAACAATGACCATAGTAATGCCTTTTCCCCCTTAAAATGTACAGGCTTATTCAAATAAAATGAGAAATGCCAATGGAATATTATTCAGCAATAATGAAAAAAATAAAAAATGGGCCAGGCACAGTGGCTCATGCCTGTAATCCCAGCACTTTGGGAGG	030	regLM	100	-0.152696	0.0227623	0.72212	-0.232232	0.0227553	0.0379842
gen_1295	ACTGGGATTGCTTGGTTGAATGGTAGTTCCATTTTTAGTTCTTTGAGAAATCTCCAAACTGCTTTCCACAGCAGCTTAACTAATTTACATTCCCACCAGCACTGTCTTAAGTGTTTCCTTTTCTCCGCAGCCTTGCCAACATCTGTAATTTTTTGACTTTTTAATGATATTCTTTATGACTGGTGCAGGATAGTATCCCA	030	regLM	55	0.0315501	0.44549	0.452206	0.211479	0.445432	0.57082
gen_1296	GATGGGTGCCTCTCCATGGAGCTCACATGTCATACTGCGCCCTGACTCATCACATGTCATTGTTCCTTTGTATTAATTTTCTGTCATCTACAGTGAGTTCCTTGAGGGCAGGGAAAGGGCTTTTTATCTCTGCATTACCAGAGCCCAACAGATACACACTGGTTCTTATTAGTCTAAATTTACAAAAGAACTATTAACAA	030	regLM	18	-0.0704752	5.05114	-0.0424704	0.343811	5.05105	0.126704
gen_1297	ATTAGCATGGAATTTGGACTTTGGAGCCATAATCCTGTTGTCTTCTTTCATTTAAAGAATATGGGCCAGGCGCGGTGGCTCACGCCTGTAATCCCAGCACTTTGGGAGGCCGAGGCGGGTGGATCATGAGGTCAGGAGATCGAGACCATCCTGGCTAACACGGTGAAAGCCTGTCTCTACTAAAAATACAAAAAATTAGC	030	regLM	58	0.235774	3.02855	1.46593	1.12602	3.02796	1.72996
gen_1298	ACTGGGATTGCTTGGTTGAATGGTAGTTCCATTTTTAGTTCTTTGAGAAATCTCCAAACTGCTTTCCACAGCAGCTTAACTAATTTACATTCCCACCAGCACTGTCTTAAGTGTTTCCTTTTCTCCGCAGCCTTGCCAACATCTGTAATTTTTTGACTTTTTAATGATATTCTTTATGACTGGTTTGTCTGCATTATTTT	030	regLM	59	0.0574388	0.355387	0.639689	0.29032	0.355512	0.681476
gen_1299	CAAATCAATTAAGCTAAAATAAATCAAAGTTGGAACAAAGCCACCAATATAATGTTAAAAAGTATTCAAATGTAAAACCAATTGAGCCAAAAATAGCATAATGATGTAACCATTTGGAATGAGCATTTATGAGGCTTTAAATCATTTTTATATTACTATTTTAAGGATCAGCACTGCCAGCAATGATTCTGAGGCTGGGG	030	regLM	95	0.753573	0.332178	2.79901	0.586812	0.332261	3.45278
gen_1300	CCTGAGAAAGGCTTCAACTAAAGAGCTATGGACAGGGACACTCTGTCACTTCCTGGGATTTTGACCCCCAGCTGTCCAACAGAGGAGGGTCTGTGCCTTCGCTCATTAGCCTAACTTAGATGATAGGTGACAAACTGAAGTGAGCTATAGGGAGTTGTCCACTTCCAGGCTGCTATCAGTACACCAGCTGCCTTGGCCTC	030	regLM	8	0.0785376	4.08987	-0.488969	-0.175956	4.09044	-0.767154
gen_1301	ATTAGCATGGAATTTGGACTTTGGAGCCATAATCCTGTTGTCTTCTTTCATTTAAAGAATATGGGCCGGGCGCGGTGGCTCACGCCTGTAATCCCAGCACTTTGGGAGGCCAAGGCAGGTGGATCACGAGGTCAGGAGATCGAGACCATCCTGGCTAACACAGTGAAACCCTGTCTCTACTAAAAATACAAAAAATTAGC	030	regLM	59	0.119586	3.22579	1.82376	0.834783	3.22589	2.36548
gen_1302	TCTCTGCTCCCCAGAGTCCCTGCACGTGGCTTGACAGTGGCCTTGGTAGGACCCACTGGGGTGTTTCTTCGTCGCCCATGGGCCCTCATGCTGTTATCAGTTGGAAATGAATCAGAGATTAGGAAGCGGGGGGAGTGGTGGGGGTGTTATCGCCCAGTGCACACAGGTTATCACAGCTCAGGGGTTTGAAGTTCATTGGG	030	regLM	21	0.943771	4.91935	-0.795523	0.525852	4.91936	-0.543474
gen_1303	CTGTTTGTGCTGTGTGTTTCCAATAATTGACAACATATGTGATTTTGTTATTCTACACTGAGCTTGCTTCGTCTGCATATTCATTAAAAAAGAATTTTTAAAATCTTTGTCAGATGTTCTACATCTGAATCATCTTCTAGTATTAAACCACAGCCAAGAACTTTTATATCTTTTATCACATTAATATAAAGATCACAAAA	030	regLM	95	-0.287246	-0.742756	3.24854	0.353449	-0.742677	1.45338
gen_1304	TCTCTGCTCCCCAGAGTCCCTGCACGTGGCTTGACAGTGGCCTTGGTAGGACCCACTGGGGTGTTTCTTCGTCGCCCATGGGCCCTCATGCTGTTATCAGTTGGAAATGAATCAGAGATTAGGAAGCGGGGGGAGTGGTGGGGGTGTTATCGCCCAGTGCACACGGGGCTCTCAGCTAATCTCTGGCGGCCCTGGGTTGC	030	regLM	3	0.748214	5.81372	-0.195148	0.906628	5.81374	0.12475
gen_1305	GTTTAGCGTAAGAATCAGGGTCCAGCTGGTGCTCCCTAAACAGCAGCTGCTGTTCACTGTTGAAAGGCGCTCTGGAAGGCCAGGCGCGGTGGCTCATGCTTGTAATCCCAGCACTGTGGGAGGCCGAGGTGGGCGGATCACCTGAGGTAAGGAGTTCGAGACCAGCCTGATCAATATGGAGAAACCCCATCTCTCCTAAA	030	regLM	62	0.276459	2.56071	3.83843	0.514135	2.56077	1.54128
gen_1306	TCTCTGCTCCCCAGAGTCCCTGCACGTGGCTTGACAGTGGCCTTGGTAGGACCCACTGGGGTGTTTCTTCGTCGCCCATGGGCCCTCATGCTGTTATCAGTTGGAAATGAATCAGAGATTAGGAAGCGGGGGGAGTGGTGGGGGTGTTATCGCCCAGTGCACACAGGTTACCACAGACATTTATCAGTGGGCAAGCAGTA	030	regLM	23	0.438036	5.25126	-0.962953	0.239093	5.25124	-0.37342
gen_1307	CTCAGAATTAATGGAGAGGGCCAGTGGCGGCCTGTGCCCTTTGTCCCACCGGCCGGCCTGGGGGTGGCGGCTCCAGAATACAGGGTCCTATTGTGTGCGCTGATGTCAGGCAGCTGGACTGCTGGGAGTGAGGATAAACAAGCAGCTGGAGCATCTCGCCTGAAGCCCCAGGAGAGGGCCAGAGCCCCCGCTGCCCGGGC	030	regLM	99	3.67348	0.265615	1.80354	2.46952	0.265564	1.51484
gen_1308	AGAAAAAAACAAACAACCCCATCAACAAGTGGGCGAAGGATATGAACAGACACTTCTCAAAAGAAGATATTTATTCAACCAAAAGACACATGAAAAAATGCTCATCATCACTGGCCATCAGAGAAATGCAAATCAAAACCACAATGAGATACCATCTCACACCAGTTAGAATGGCGATCATTGAAAAGTCAGGAAGGAAC	030	regLM	45	-0.42975	1.00347	0.162713	-0.157357	1.00353	-0.327024
gen_1309	AGAATTGGAAGGAGCTTAGGGGAAAGCTAGCCTCAGGTCAGAATTGCCTGCATGCCACTCGGCTAGTGAGCTGCTGAATCACCTTATTCCTGGAGAAAGATTTTGTTTTTTATTTTATTTTATTTTATTTTATTTTATTTTATTTTATTTTATTTTATTTTACCTAAAGACGAAGTCTTGCTCTGTCACCCAGGCTGGAG	030	regLM	97	0.262904	0.764327	0.71825	0.353654	0.764827	1.02364
gen_1310	TCTCTGCTCCCCGGAGTCCCTGCACGTGGCTTGACAGTGGCCTTGGTAGGACCCACTGGGGTGTTTCTTCGTCGCCCATGGGCCCTCATGCTGTTATCAATTGGAAATGAATCAGAGATTAGGAAGCGGGGGGAGTGGTGGGGGTGTTATCGCCCAGTGCACACAGGTTACCACAGACATTTAGCCCTCGAGGGGGCAGA	030	regLM	21	0.316019	4.57968	-0.509711	0.100975	4.57953	-0.337015
gen_1311	GATTTTTCTACTGCTAGGTTTTCCTTTTGGGGTTACGATTATTACAGGTGGCAATCAGTTAACTTAGTGGTTCTGTAGGCACCGCCCTATCTTCCAACTCACTTACATTTAAAAATTCACACAGAGAGGCTAGTGGGAAGCGGGTAGGTGTAAACAATGTGCTACAGTGAGAAAACTGAAGTTTATCAAGCTCCAGTGAT	030	regLM	98	0.442473	2.14057	0.267034	0.103938	2.14065	0.208336
gen_1312	CCAGTAATGGGATGGCTGGGTCCAATGGTATTTCTAGTTCTAGATCCCTGAGGAATCGCCACACTGACTTCCACAATGGTTGAACTAGTTTACAGTCCCGCCAACAGTGTATAAGTGTTCCTATTTCTCCACATCCTCTCCAGCACCTGTTGTTTCCTGACTTTTTAATGATCGCCATTCTAACTGGTGTGAGATGGTAT	030	regLM	7	-0.420217	0.749163	-0.518858	-0.0509134	0.749462	-0.524371
gen_1313	AGAATTGGAAGGAGCTTAGGGGAAAGCTAGCCTCAGGTCAGAATTGCCTGCATGCCACTCGGCTAGTGAGCTGCTGAATCACCTTATTCCTGGAGAAAGATTTTGTTTTTTATTTTATTTTATTTTATTTTATTTTATTTTATTTTATTTTATTTTATTTTATTTTATTTTATTTAACATAAGACTTTGAAATGCAATGA	030	regLM	98	0.1992	0.238409	0.582012	0.214461	0.238435	0.880138
gen_1314	GTTTAGCGTAAGAATCAGGGTCCAGCTGGTGCTCCCTAAACAGCAGCTGCTGTTCACTGTTGAAAGGCGCTCTGGAAGGCCAGGTGCGGTGGCTCATGCTTGTAATCCCAGCACTGTGGGAGGCCGAGGTGGGCGGATCACCTGAGGTAAAGAGTTCGAGACCAGCCTGACCAACGTGGAGAAACCCCATCTCTCCTAAA	030	regLM	63	0.116708	2.40643	3.27919	0.283501	2.40653	0.401909
gen_1315	TCTCTGCTCCCCAGAGTCCCTGCACGTGGCTTGACAGTGGCCTTGGTAGGACCCACTGGGGTGTTTCTTCGTCGCCCATGGGCCCTCATGCTGTTATCAATTGGAAATGAATCAGAGATTAGGAAGCGGGGGGAGTGGTGGGGGTGTTATCGCCCAGTGCACACAGGTTACCACAGATGGAATAAGGGAAGCCAGGCTCG	030	regLM	19	0.137467	4.07463	-0.607641	0.00480484	4.07458	-0.357628
gen_1316	TTTTGTTCTCTTACATGTTGCCTATGGTATTATAAGAATTGAAAGAAGGCCAGGCGCAGTGGCTCACACCTGTAATCCCAGCACTTTGGGAGGCTGAGGCAGGCAGATCACTGGAGGTCAGCAGTTCGAGACCAGCCTGGCCAACATGGTGAAACCCCATCTCTACTAAAAATACAAAAATTAGCCAGGCATGGTGGTGC	030	regLM	48	-0.227111	2.90396	3.82303	0.0969243	2.90435	0.841537
gen_1317	ATTAGCATGGAATTTGGACTTTGGAGCCATAATCCTGTTGTCTTCTTTCATTTAAAGAATATGGGCCAGGCGCGGTGGCTCACGCCTGTAATCCCAGCACTTTGGGAGGCCGAGGCGGGTGGATCATGAGGTCAGGAGATCGAGACCATCCTGGCTAACACGGTGAAAGCCTGTCTCTACTAAAAATACAAAAAAATAGG	030	regLM	58	0.298585	3.0238	1.08244	1.12672	3.0238	1.73026
gen_1318	ATATTGGTACAGCACATTTGTCGCTATTAATAAACCAGTATCCAGGGCCAGGTGCAGTGGCTCACGCCTGTAATCCCAGCACTTTGGGAGGCCGAGGCAGGTGGATCACCTGAGGTCAGGAGTTCGAGACCAGCCTGACCAACATGGGAAAACCCTGTCTCTACTAAAAATACAAAATTAGCTGGGCTTGGTGGTACATG	030	regLM	48	-0.300088	3.19526	3.38125	-0.0324389	3.19531	0.917931
gen_1319	CCTGAGAAAGGCTTCAACTAAAGAGCTATGGACAGGGACACTCTGTCACTTCCTGGGATTTTGACCCCCAGCTGTCCAACAGAGGAGGGTCTGTGCCTTCGCTCATTAGCCTAACTTAGATGATAGGTGACAAACTGAAGTGAGCTATAGGGAGTTGTCCACTTCCAGGCTGCTATCACTACAACCCAGGTGTGTCCAGG	030	regLM	11	-0.219453	0.804605	-0.870816	-0.178331	0.804568	-1.02831
gen_1320	ATTAGCATGGAATTTGGACTTTGGAGCCATAATCCTGTTGTCTTCTTTCATTTAAAGAATATGGGCCAGGCGCGGTGGCTCACGCCTGTAATCCCAGCACTTTGGGAGGCCGAGGCGGGTGGATCATGAGGTCAGGAGATCGAGACCATCCTGGCTAACACGGTGAAAGCCTGTCTCTACTAAAAATACAAAAAAATTAG	030	regLM	58	0.251553	3.00691	1.43544	1.13941	3.00667	1.62964
gen_1321	GATTTTTCTACTGCTAGGTTTTCCTTTTGGGGTTACGATTATTACAGGTGGCAATCAGTTAACTTAGTGGTTCTGTAGGCACCGCCCTATCTTCCAACTCACTTACATTTAAAAATTCACACAGAGAGGCTAGTGGGAAGCGGGTAGGTGTAAACAATGTGCTACAGTGAGGCTGGCCTCAGAGGCTGGCGAGCAGCTGT	030	regLM	100	1.10225	1.56749	0.704246	0.738329	1.56759	0.7161
gen_1322	TCTCTGCTCCCCAGAGTCCCTGCACGTGGCTTGACAGTGGCCTTGGTAGGACCCACTGGGGTGTTTCTTCGTCGCCCATGGGCCCTCATGCTGTTATCAGTTGGAAATGAATCAGAGATTAGGAAGCGGGGGGAGTGGTGGGGGTGTTATCGCCCAGTGCACACGGGGCTCTCAGCTAATCTCTGGCGGCCCTGGGTGAA	030	regLM	4	0.749058	5.79722	-0.242751	0.891953	5.79715	0.099944
gen_1323	TCTCTGCTCCCCAGAGTCCCTGCACGTGGCTTGACAGTGGCCTTGGTAGGACCCACTGGGGTGTTTCTTCGTCGCCCATGGGCCCTCATGCTGTTATCAGTTGGAAATGAATCAGAGATTAGGAAGCGGGGGGAGTGGTGGGGGTGTTATCGCCCAGTGCACACGGAATCTCGTAAGGACCGACTCCCGCCGGGAAAGCT	030	regLM	20	0.835139	5.1184	-0.142639	0.335097	5.11851	-0.181657
gen_1324	AAAAAAACAAACAACCCCATCAACAAGTGGGCGAAGGATATGAACAGACACTTCTCAAAAGAAGATATTTATTCAACCAAAAGACACATGAAAAAATGCTCATCATCACTGGCCATCAGAGAAATGCAAATCAAAACCACAATGAGATACCATCTCACACCAGTTAGAATGGCGATCATTGAAAAGTCAGGAAGCAACGG	030	regLM	48	-0.487312	0.935895	0.0129429	-0.189733	0.935901	-0.363819
gen_1325	CCTGAGAAAGGCTTCAACTAAAGAGCTATGGACAGGGACACTCTGTCACTTCCTGGGATTTTGACCCCCAGCTGTCCAACAGAGGAGGGTCTGTGCCTTTGCTCATTAGTCCATTTTACAGAGAGCTGATTGGTCTGTTTTACAGAGAGCTGATTGGTCTGTTTTACAGAGAGCTATGTCCAGAGATAAAATTCTTTTCT	030	regLM	50	3.93756	4.56365	3.94445	4.43097	4.56356	4.52683
gen_1326	ATTAGCATGGAATTTGGACTTTGGAGCCATAATCCTGTTGTCTTCTTTCATTTAAAGAATATGGGCCGGGCGCGGTGGCTCACGCCTGTAATCCCAGCACTTTGGGAGGCCGAGGCGGGTGGATCATGAGGTCAGGAGATCGAGACCATCCTGGCTAACACGGTGAAAGCCTGTCTCTACTAAAAATACAAAAAAAAATA	030	regLM	57	0.397457	3.25321	1.43146	1.24487	3.25317	1.74148
gen_1327	CCCGAATACTGTGCTTTTCCGACGGGCTTAGGAAACGGCACACCAGGATATTATATCCTGCACCTGGCTCGGAGGGTCCTACGTGCACGGAGTCTCGCTCATTGCTAGCACAGAAGTCTGAGATCAAACTGCAAGGCGGCAGCGAGGCTGGGGGAGGGGTGCCCGCCATTGCCCAGGCTTGCTTAGGTAAACAGAGCATC	030	regLM	96	0.997199	0.0780907	1.39705	2.07618	0.078122	0.0576742
gen_1328	CTAGCTGTACCAGCCGCTGCCCCGGACCTGCTGCCCTGCCCCACCCCCCCCTCCCCTGGCCAGCCTCCCCAGAGGCCAGAAGGCGCCTTATCGGGCAGGGTTAAGGAGGGGGACAGTTATCAGGGGCTGCAGCCTAGGTTGGGCCACAATGTCCTCGTCTCTTGAGGGTGGCAGGCTGTGCAGGCTCCCTGATAAAAGCA	030	regLM	1	0.533996	5.82284	0.664056	1.11858	5.82274	0.785881
gen_1329	CTCTCTATTACATTCCATTCTCCATTCCATTCCATTCTCCATTCCATTCCATTCTCCATTCCATTCCACTCCATTCTCCATTCCATTCCATTCTCCATTAAATTCCATTCTCCATTACATTCCATTCTCCATTACATTCCATTCTCCATTACATTCCATTCTCCATTACATTCCATCCTTTCATTTCTTTCCATATTTTA	030	regLM	91	-0.528132	-0.310411	4.04354	-0.240112	-0.31041	0.0230761
gen_1330	TCTCTGCTCCCCAGAGTCCCTGCACGTGGCTTGACAGTGGCCTTGGTAGGACCCACTGGGGTGTTTCTTCGTCGCCCATGGGCCCTCATGCTGTTATCAGTTGGAAATGAATCAGAGATTAGGAAGCGGGGGGAGTGGTGGGGGTGTTATCGCCCAGTGCACACGGGGCTCCCTTGCTCCCCGCGGAAATCTTGTGTAAG	030	regLM	17	0.567095	5.41974	-0.276937	0.242026	5.41973	-0.0994883
gen_1331	GTTTAGCGTAAGAATCAGGGTCCAGCTGGTGCTCCCTAAACAGCAGCTGCTGTTCACTGTTGAAAGGCGCTCTGGAAGGCCAGGTGCGGTGGCTCATGCTTGTAATCCCAGCACTGTGGGAGGCCGAGGTGGGCGGATCACCTGAGGTAAGGAGTTCGAGACCAGCCTGACCAACGTGGAGAAATCCCATCTCTCCTAAA	030	regLM	62	0.099391	2.27871	2.93474	0.212669	2.27844	0.649033
gen_1332	CTGTTTGTGCTGTGTGTTTCCAATAATTGACAACATATGTGATTTTGTTATTCTACACTGAGCTTGCTTCGTCTGCATATTCATTAAAAAAGAATTTTTTAAATCTTTGTCAGATGTTCTACATCTGAATCATCTTCTAGTATTAAACCACAGCCAAGAACTTTTATATCTTTTATCACATTAATATAAAGATCCCACGA	030	regLM	95	-0.226646	-0.625226	3.08687	0.418666	-0.625285	1.5753
gen_1333	GATTTTTCTACTGCTAGGTTTTCCTTTTGGGGTTACGATTATTACAGGTGGCAATCAGTTAACTTAGTGGTTCTGTAGGCACCGCCCTATCTTCCAACTCACTTACATTTAAAAATTCACACAGAGAGGCTAGTGGGAAGCGGGTAGGTGTAAACAATGTGCTACAGTGAGTCACACCCGTCACAGGAGCTCCCCACTGA	030	regLM	98	2.48623	4.03619	0.189989	2.36678	4.03596	0.941773
gen_1334	CTCAGAATTAATGGAGAGGGCCAGTGGCGGCCTGTGCCCTTTGTCCCACCGGCCGGCCTGGGGGTGGCGGCTCCAGAATACAGGGTCCTATTGTGTGCCCTGATGTCAGGCAGCTGGACTGCTGGGAGTGAGGATAAACAAGCAGCTGGAGCATCTCGCCTGAAGCCCCAGGAGAGGGCCAGAGCCCCTGCAGCAGCAGT	030	regLM	97	2.99936	-0.000428427	1.20497	2.16302	-0.000527808	1.16443
gen_1335	AGAATTGGAAGGAGCTTAGGGGAAAGCTAGCCTCAGGTCAGAATTGCCTGCATGCCACTCGGCTAGTGAGCTGCTGAATCACCTTATTCCTGGAGAAAGATTTTGTTTTTTATTTTATTTTATTTTATTTTATTTTATTTTATTTTATTTTATTTTATTTTATTTTACTTTAAGATGCAGGCTCAGGGATGTGCTGGCAT	030	regLM	96	0.30405	0.330875	0.755536	0.353256	0.330882	1.11268
gen_1336	TGTATACCCAAGACCCAGACATGTCCTTTATATATTGGAGGAACTTAACAAATATTTGTTAAATGAACTGATCAAGCAAAGACTCACAATGGTCAAAAAAGGAAATTTGCACAGGGTTACACCACTAGGAAGCCACAGAGTTTTTATTTAAACACAGGCTGTCTGAGTCCAGAGCCCAAGCTCATAACTATTATGCAATT	030	regLM	97	3.13876	0.470704	0.131177	3.10869	0.470681	0.57236
gen_1337	GATTTTTCTACTGCTAGGTTTTCCTTTTGGGGTTACGATTATTACAGGTGGCAATCAGTTAACTTAGTGGTTCTGTAGGCACCGCCCTATCTTCCAACTCACTTACATTTAAAAATTCACACAGAGAGGCTAGTGGGAAGCGGGTAGGTGTAAACAATGTGCTACAGTGAGACTGATCGCTGAGCAAACTAACGTAGCTA	030	regLM	99	1.10883	1.81148	0.499625	1.04325	1.8115	0.539984
gen_1338	GATTTTTCTACTGCTAGGTTTTCCTTTTGGGGTTACGATTATTACAGGTGGCAATCAGTTAACTTAGTGGTTCTGTAGGCACCGCCCTATCTTCCAACTCACTTACATTTAAAAATTCACACAGAGAGGCTAGTGGGAAGCGGGTAGGTGTAAACAATGTGCTACAGTGAGAAACCTGAAGTTTGAGGTTACAGTTGCCT	030	regLM	99	0.599419	1.3635	0.100201	0.2045	1.36345	-0.0207416
gen_1339	ACTGGGATTGCTTGGTTGAATGGTAGTTCCATTTTTAGTTCTTTGAGAAATCTCCAAACTGCTTTCCACAGCAGCTTAACTAATTTACATTCCCACCAGCACTGTCTTAAGTGTTTCCTTTTCTCCGCAGCCTTGCCAACATCTGTAATTTTTTGACTTTTTAATGATATTCTTTATGACTGGTGCAAGATGATATCTCC	030	regLM	54	0.0454827	1.07946	0.645819	0.275031	1.0793	0.30651
gen_1340	CCTGAGAAAGGCTTCAACTAAAGAGCTATGGACAGGGACACTCTGTCACTTCCTGGGATTTTGACCCCCAGCTGTCCAACAGAGGAGGGTCTGTGCCTTCGCTCATTAGCCTAACTTAGATGATAGGTGACAAACTGAAGTGAGCTATGGGGAGAGGTACCTCACTTGACTTCAGAGGGAGTGTCAGGAAGTTGCCTCGT	030	regLM	29	1.072	1.89777	-0.120816	0.391806	1.89796	-0.118016
gen_1341	ACTGGGATTGCTTGGTTGAATGGTAGTTCCATTTTTAGTTCTTTGAGAAATCTCCAAACTGCTTTCCACAGCAGCTTAACTAATTTACATTCCCACCAACAGTGTAAAAGTGTTCCTATTTCTCCACATCCTCTCCAGTATCTGTTGTTTCCTGACTTTTTAATGATCACTATTCTAACTGGTGTGAGATGGTATCTCAT	030	regLM	30	-0.317102	2.36903	-0.00333283	-0.0645808	2.36904	-0.176495
gen_1342	GTTTAGCGTAAGAATCAGGGTCCAGCTGGTGCTCCCTAAACAGCAGCTGCTGTTCACTGTTGAAAGGCGCTCTGGAAGGCCAGGTGCGGTGGCTCATGCTTGTAATCCCAGCACTGTGGGAGGCCGAGGTGGGCGGATCACCTGAGGTAAGGAGTTCGAGACCAGCCTGAACATAATATATATATATATATATATATATA	030	regLM	70	-0.0434503	1.22991	0.275836	0.0184511	1.22992	-0.333547
gen_1343	GTTTAGCGTAAGAATCAGGGTCCAGCTGGTGCTCCCTAAACAGCAGCTGCTGTTCACTGTTGAAAGGCGCTCTGGAAGGCCAGGTGCGGTGGCTCATGCTTGTAATCCCAGCACTGTGGGAGGCCGAGGTGGGCGGATCACCTGAGGTAAGGAGTTCGAAACCAGCCTGACCAACGTGGAGAAACCCCATCTCTCCTAAA	030	regLM	63	0.1337	2.45794	2.70358	0.381909	2.45832	0.376061
gen_1344	CTAGCTGTACCAGCCGCTGCCCCGGACCTGCTGCCCTGCCCCACCCCCCCCTCCCCTGGCCAGCCTCCCCAGAGGCCAGAAGGCGCCTTATCGGGCAGGGTTAAGGAGGGGGACAGTTATCAGGGGCTGCAGCCTAGGTTGGGCCACAATGTCCTCGTCTCTTGAGGGTGGCAGGCTGTGCAGGCTCCCTGACCAGGGCA	030	regLM	5	0.555271	5.12221	0.716414	0.389276	5.12221	0.840265
gen_1345	TCTCTGCTCCCCAGAGTCCCTGCACGTGGCTTGACAGTGGCCTTGGTAGGACCCACTGGGGTGTTTCTTCGTCGCCCATGGGCCCTCATGCTGTTATCAGTTGGAAATGAATCAGAGATTAGGAAGCGGGGGGAGTGGTGGGGGTGTTATCGCCCAGTGCACACAGGTTACCACAGAGGTCACACGGTAGTTACACAGCA	030	regLM	25	1.49592	5.7254	-0.391563	2.1486	5.72545	-0.205253
gen_1346	GATTTTTCTACTGCTAGGTTTTCCTTTTGGGGTTACGATTATTACAGGTGGCAATCAGTTAACTTAGTGGTTCTGTAGGCACCGCCCTATCTTCCAACTCACTTACATTTAAAAATTCACACAGAGAGGCTAGTGGGAAGCGGGTAGGTGTAAACAATGTGCTACAGTGAGAAATAGTACAACCACTTATTAGGCCGGGC	030	regLM	100	0.522162	1.40316	0.340211	0.222907	1.40325	0.158288
gen_1347	CCTGAGAAAGGCTTCAACTAAAGAGCTATGGACAGGGACACTCTGTCACTTCCTGGGATTTTGACCCCCAGCTGTCCAACAGAGGAGGGTCTGTGCCTTTGCTCATTAGCCTAACTTAGATGATAGGTGACAAACTGAAGTGAGCTATAGGGAGTTGTCCACTTCCAGGCTGCTATCAGTATACCAGCTGGGGTGTGGCC	030	regLM	1	0.176925	4.71363	-0.326447	-0.0560952	4.71372	-0.633518
gen_1348	AGAATTGGAAGGAGCTTAGGGGAAAGCTAGCCTCAGGTCAGAATTGCCTGCATGCCACTCGGCTGGCTAGTGAGCTGCTGAATCACCTTATTCCTGGAGAAAGACTTTGATACTGAGAAAACTGACTTGCTCAGCTCTTGCTACAACTGTGACCATCTCTGCAACAGTTTTATCTTTGGAATCTGTTTCTCCACTATGGC	030	regLM	94	0.178975	1.56023	0.475077	0.154397	1.56016	0.487928
gen_1349	TCTCTGCTCCCCAGAGTCCCTGCACGTGGCTTGACAGTGGCCTTGGTAGGACCCACTGGGGTGTTTCTTCGTCGCCCATGGGCCCTCATGCTGTTATCAGTTGGAAATGAATCAGAGATTAGGAAGCGGGGGGAGTGGTGGGGGTGTTATCGCCCAGTGCACACAGGTTACCACAGGGCGCTTTCATGAGCCGGTTACTG	030	regLM	22	0.972739	5.13484	-0.359972	0.61949	5.13485	-0.148029
gen_1350	CTCAGAATTAATGGAGAGGGCCAGTGGCGGCCTGTGCCCTTTGTCCCACTGGCCGGCCTGGGGGTGGCGGCTCCAGAATACAGGGTCCTATTGTGTGCCCTGATGTCAGGCAGCTGGACTGCTGGGAGTGAGGATAAACAAGCAGCTGGAGCATCTCGCCTGAAGCCCCAGGAGAGGGCCAGAGCCCCTGAAGAAGCATT	030	regLM	98	2.69246	0.0695684	1.3186	2.24426	0.0695515	1.237
gen_1351	AGAAAAAAACAAACAACCCCATCAACAAGTGGGCGAAGGATATGAACAGACACTTCTCAAAAGAAGATATTTATTCAACCAAAAGACACATGAAAAAATGCTCATCATCACTGGCCATCAGAGAAATGCAAATCAAAACCACAATGAGATACCATCTCACACCAGTTAGAATGGCGATCATTGAAAAGTCAGGAAGCAAG	030	regLM	45	-0.464286	1.08943	0.0756806	-0.16078	1.08933	-0.343481
gen_1352	CTCAGAATTAATGGAGAGGGCCAGTGGCGGCCTGTGCCCTTTGTCCCACCGGCCGGCCTGGGGGTGGCGGCTCCAGAATACAGGGTCCTATTGTGTGCCCTGATGTCAGGCAGCTGGACTGCTGGGAGTGAGGATAAACAAGCAGCTGGAGCATCTCGCCTGAAGCCCCAGGAGAGGGCCAGAGCCCACTTCCGGCCTGG	030	regLM	97	4.2883	1.13191	2.4287	3.3355	1.13183	2.55123
gen_1353	TCTCTGCTCCCCAGAGTCCCTGCACGTGGCTTGACAGTGGCCTTGGTAGGACCCACTGGGGTGTTTCTTCGTCGCCCATGGGCCCTCATGCTGTTATCAGTTGGAAATGAATCAGAGATTAGGAAGCGGGGGGAGTGGTGGGGGTGTTATCGCCCAGTGCACACAGGTTACCACAGGAGAAGGGGGTTGGGGAAGTTGGG	030	regLM	23	1.17455	5.76524	-0.458209	0.824644	5.76524	-0.0296946
gen_1354	CTCAGAATTAATGGAGAGGGCCAGTGGCGGCCTGTGCCCTTTGTCCCACCGGCCGGCCTGGGGGTGGCGGCTCCAGAATACAGGGTCCTATTGTGTGCCCTGATGTCAGGCAGCTGGACTGCTGGGAGTGAGGATAAACAAGCAGCTGGAGCATCTCGCCTGAAGCCCCAGGAGAGGGCCAGAGCCCCTGCAGCAGAATG	030	regLM	98	2.96267	-0.0354906	1.16753	2.13701	-0.0354985	1.164
gen_1355	TCTCTGCTCCCCAGAGTCCCTGCACGTGGCTTGACAGTGGCCTTGGTAGGACCCACTGGGGTGTTTCTTCGTCGCCCATGGGCCCTCATGCTGTTATCAGTTGGAAATGAATCAGAGATTAGGAAGCGGGGGGAGTGGTGGGGGTGTTATCGCCCAGTGCACACAGGTTACCACAGACATTTATCACTCACCGGGGACAT	030	regLM	22	0.604246	5.58614	-0.448051	0.453007	5.58615	-0.305463
gen_1356	CTCAGAATTAATGGAGAGGGCCAGTGGCGGCCTGTGCCCTTTGTCCCACCGGCCGGCCTGGGGGTGGCGGCTCCAGAATACAGGGTCCTATTGTGTGCCCTGATGTCAGGCAGCTGGACTGCTGGGAGTGAGGATAAACAAGCAGCTGGAGCATCTCGCCTGAAGCCCCAGGAGAGGGCCAGAGCCCCTGCAGCAGCCAG	030	regLM	97	2.92023	0.0103922	1.2348	2.15621	0.0103869	1.19609
gen_1357	CTAGCTGTACCAGCCGCTGCCCCGGACCTGCTGCCCTGCCCCACCCCCCCCTCCCCTGGCCAGCCTCCCCAGAGGCCAGAAGGCGCCTTATCGGGCAGGATTAAGGAGGGGGACAGTTATCAGGGGCTGCAGCCTAGGTTGGGCCACAATGTCCTCGTCTCTTGAGGGTGGCAGGCTGTGCAGGCTCCCTGACAAGGGCT	030	regLM	4	0.0253982	5.24867	0.482156	0.26378	5.2487	0.536148
gen_1358	CTCAGAATTAATGGAGAGGGCCAGTGGCGGCCTGTGCCCTTTGTCCCACCGGCCGGCCTGGGGGTGGCGGCTCCAGAATACAGGGTCCTATTGTGTGCGCTGATGTCAGGCAGCTGGACTGCTGGGAGTGAGGATAAACAAGCAGCTGGAGCATCTCGCCTGAAGCCCCAGGAGAGGGCCAGAGCCCCCGCTGCCGGCCT	030	regLM	97	3.75513	0.343165	1.90898	2.4831	0.343109	1.55653
gen_1359	CTAGCTGTACCAGCCGCTGCCCCGGACCTGCTGCCCTGCCCCACCCCCCCCTCCCCTGGCCAGCCTCCCCAGAGGCCAGAAGGCGCCTTATCGGGCAGGATTAAGGAGGGGGACAGTTATCAGGGGCTGCAGCCTAGGTTGGGCCACAATGTCCTCGTCTCTTGAGGGTGGCAGGCTGTGCAGGCTCCCTGACAAGGGCA	030	regLM	3	-0.00754461	5.17269	0.491723	0.256554	5.17263	0.519959
gen_1360	CCTGAGAAAGGCTTCAACTAAAGAGCTATGGACAGGGACACTCTGTCACTTCCTGGGATTTTGACCCCCAGCTGTCCAACAGAGGAGGGTCTGTGCCTTCGCTCATTAGCCTAACTTAGATGATAGGTGACAAACTGAAATGAGCTATAGGGAGTTGTCCACTTCCAGGCTGCTATCACTGTCTCAGATGTGGCCTTGGG	030	regLM	12	0.171812	1.05967	-0.554145	-0.126971	1.05955	-0.713961
gen_1361	CCTGAGAAAGGCTTCAACTAAAGAGCTATGGACAGGGACACTCTGTCACTTCCTGGGATTTTGACCCCCAGCTGTCCAACAGAGGAGGGTCTGTGCCTTTGCTCATTAGCCTAACTTAGATGATAGGTGACAAACTGAAGTGAGCTATAGGGAGTTGTCCACTTCCAGGCTGTTATCAGTGTTTGCCAAGGCCTTTCCCC	030	regLM	14	0.116076	4.51423	-0.972683	-0.0889314	4.51442	-0.883693
gen_1362	ATTATGATACAGTCCAAGTATGTAACTTTCTGGGGACCAGACTTTGCTGAGAGTCATAATGGAGAGTCAAAGAGTCTGATGGCTGAGAGGGATGTGCCTAGGCTTGCCTTCATAAATGTTCATTGTCTCAGCCAAGGTTTTGGCAGGAGCGAGAGCAGGCTCAGATCAGTGTCACAGGCAGTACCTTACGTGCCTTGGCC	030	regLM	96	1.45429	-0.0690815	5.08133	1.10286	-0.0690679	1.70391
gen_1363	GATTTTTCTACTGCTAGGTTTTCCTTTTGGGGTTACGATTATTACAGGTGGCAATCAGTTAACTTAGTGGTTCTGTAGGCACCGCCCTATCTTCCAACTCACTTACATTTAAAAATTCACACAGAGAGGCTAGTGGGAAGCGGGTAGGTGTAAACAATGTGCTACAGTGAGAATGAATGGAGAGCCTCCTGGGGGCAACA	030	regLM	100	0.505918	1.74759	0.0160904	0.161718	1.7474	0.22635
gen_1364	CCTGAGAAAGGCTTCAACTAAAGAGCTATGGACAGGGACACTCTGTCACTTCCTGGGATTTTGACCCCCAGCTGTCCAACAGAGGAGGGTCTGTGCCTTTGCTCATTAGCCTAACTTAGATGATAGGTGACAAACTGAAGTGAGCTATAGGGAGTTGTCCACTTCCAGGCTGCTATCAGTATACCAGCTGGGGTGTGGCT	030	regLM	1	0.116068	4.6595	-0.380141	-0.0737857	4.65959	-0.670214
gen_1365	ATTATGATACAGTCCAAGTATGTAACTTTCTGGGGACCAGACTTTGCTGAGAGTCATAATGGAGAGTCAAAGAGTCTGATGGCTGAGAGGGATGTGCCTGGGCTTGCCTTCATAAATGTTCATTGTCTCAGCCAAGGTTTTGGCAGGAGCGAGAGCAGGCTCAGATCAGTGTCACAGGCAGTACCTTACGTGACTTGGAC	030	regLM	95	2.41013	0.145944	6.43576	2.54264	0.145928	3.99261
gen_1366	CCTGAGAAAGGCTTCAACTAAAGAGCTATGGACAGGGACACTCTGTCACTTCCTGGGATTTTGACCCCCAGCTGTCCAACAGAGGAGGGTCTGTGCCTTTGCTCATTAGCCTAACTTAGATGATAGGTGACAAACTGAAGTGAGCTATGGGGAGAGGTACCTCATGTCCAGCTGAGGGAAGCAGCCAGGTCAACTCAGGG	030	regLM	25	-0.047914	-0.052633	-0.600347	-0.231807	-0.0526568	-0.844099
gen_1367	ATTAGCATGGAATTTGGACTTTGGAGCCATAATCCTGTTGTCTTCTTTCATTTAAAGAATATGGGCCGGGCGCGGTGGCTCACACCTGTAATCCCAGCACTTTGGGAGGCCAAGGCGGGTAGATCACGAGGTCAGGAGATCGAGACCATCCTGGCTAACACAGTGAAACCCTGTCTCTACTAAAAATACAAAAAAATTAG	030	regLM	58	0.0457279	2.71058	1.55278	0.704192	2.71017	1.71549
gen_1368	CCTGAGAAAGGCTTCAACTAAAGAGCTATGGACAGGGACACTCTGTCACTTCCTGGGATTTTGACCCCCAGCTGTCCAACAGAGGAGGGTCTGTGCCTTTGCTCATTAGCCTAACTTAGATGATAGGTGACAAACTGAAGTGAGCTATAGGGAGTTGTCCACTTCCAGGCTGCTATCACTACATCTGCAAAGGCTGTTAC	030	regLM	11	-0.0505808	1.67044	-0.947399	-0.167969	1.67052	-0.758506
gen_1369	CCTCAGAATTAATGGAGAGGGCCAGTGGCGGCCTGTGCCCTTTGTCCCACTGGCCGGCCTGGGGGTGGCGGCTCCAGAATACAGGGTCCTATTGTGTGCCCTGATGTCAGGCAGCTGGACTGCTGGGAGTGAGGATAAACAAGCAGCTGGAGCATCTCGCCTGAAGCCCCAGGAGAGGGCCAGAGCCCCTGCAGCAGCGG	030	regLM	96	3.11814	0.114053	1.59482	2.41485	0.114027	1.38662
gen_1370	CCTGAGAAAGGCTTCAACTAAAGAGCTATGGACAGGGACACTCTGTCACTTCCTGGGATTTTGACCCCCAGCTGTCCAACAGAGGAGGGTCTGTGCCTTCGCTCATTAGCCTAACTTAGATGATAGGTGACAAACTGAAGTGAGCTATAGGGAGTTGTCCACTTCCAGGCTGCTATCACTGTCTCAGATACTGCCTGATT	030	regLM	13	0.0711117	1.10667	-0.450293	-0.114483	1.10664	-0.672111
gen_1371	CCTGAGAAAGGCTTCAACTAAAGAGCTATGGACAGGGACACTCTGTCACTTCCTGGGATTTTGACCCCCAGCTGTCCAACAGAGGAGGGTCTGTGCCTTCGCTCATTAGCCTAACTTAGATGATAGGTGACAAACTGAAGTGAGCTATGGGGAGAGGTTGCCACAACCTCAGCTTTCCAGAGGCCATGCCTGGGAGGCAG	030	regLM	23	0.116175	-0.0745794	-0.462666	-0.199782	-0.0746017	-0.622724
gen_1372	CCTGAGAAAGGCTTCAACTAAAGAGCTATGGACAGGGACACTCTGTCACTTCCTGGGATTTTGACCCCCAGCTGTCCAACAGAGGAGGGTCTGTGCCTTCGCTCATTAGCCTAACTTAGATGATAGGTGACAAACTGAAATGAGCTATAGGGAGTTGTCCACTTCCAGGCTGCTATCACTGTCTCAGATGCCGTGTGACC	030	regLM	10	0.0929096	1.24268	-0.454097	-0.12825	1.24261	-0.650746
gen_1373	GTTTAGCGTAAGAATCAGGGTCCAGCTGGTGCTCCCTAAACAGCAGCTGCTGTTCACTGTTGAAAGGCGCTCTGGAAGGCCAGGTGCGGTGGCTCATGCTTGTAATCCCAACACTGTGGGAGGCCGAGGTGGGCGGATCACCTGAGGTAAGGAGTTCGAGACCAGCCTGACCAACGTGGAGAAACCCCATCTCTCCTAAA	030	regLM	63	0.0929234	2.473	3.26911	0.233378	2.47281	0.425499
gen_1374	TCTCTGCTCCCCAGAGTCCCTGCACGTGGCTTGACAGTGGCCTTGGTAGGACCCACTGGGGTGTTTCTTCGTCGCCCATGGGCCCTCATGCTGTTATCAGTTGGAAATGAATCAGAGATTAGGAAGCGGGGGGAGTGGTGGGGGTGTTATCGCCCAGTGCACACAGGTTACCACAGACATTTAGCCCTCACAGGAACCCT	030	regLM	23	0.872487	5.13186	-0.497307	0.491624	5.13187	-0.209537
gen_1375	TCTCTGCTCCCCAGAGTCCCTGCACGTGGCTTGACAGTGGCCTTGGTAGGACCCACTGGGGTGTTTCTTCGTCGCCCATGGGCCCTCATGCTGTTATCAGTTGGAAATGAATCAGAGATTAGGAAGCGGGGGGAGTGGTGGGGGTGTTATCGCCCAGTGCACACAGGTTAGGACAGTTAACCTCTTATCTGGCCCTGGTT	030	regLM	17	0.777807	5.8464	-0.997819	0.725751	5.84648	-0.602512
gen_1376	ATATTGGTACAGCACATTTGTCGCTATTAATAAACCAGTATCCAGGGCCAGGTGCAGTGGCTCACGCCTGTAATCCCAGCACTTTGGGAGGCCGAGGCAGGTGGATCACCTGAAGTCAGGAGTTCGAGACCAGCCTGACCAACATGGGAAAACCCTGTCTCTACTAAAAATACAAAATTAGCTGGGCTTGGTGGTGCATG	030	regLM	49	-0.324436	2.98199	2.83453	-0.179787	2.98193	0.341188
gen_1377	TCTCTGCTCCCCAGAGTCCCTGCACGTGGCTTGACAGTGGCCTTGGTAGGACCCACTGGGGTGTTTCTTCGTCGCCCATGGGCCCTCATGCTGTTATCAATTGGAAATGAATCAGAGATTAGGAAGCGGGGGGAGTGGTGGGGGTGTTATCGCCCAGTGCACACAGGTTACCACAGACGTTTAACAGCAGCAGGTTTGAC	030	regLM	21	0.30815	4.39858	-0.926556	0.0989595	4.39858	-0.546224
gen_1378	CCTGAGAAAGGCTTCAACTAAAGAGCTATGGACAGGGACACTCTGTCACTTCCTGGGATTTTGACCCCCAGCTGTCCAACAGAGGAGGGTCTGTGCCTTCGCTCATTAGCCTAACTTAGATGATAGGTGACAAACTGAAGTGAGCTATGGGGAGAGGTACCTCATTTATCTGTTGCTGGGTGTGTCACAGCAGGACATGT	030	regLM	27	-0.0415176	2.08441	-0.710157	-0.169475	2.08447	-0.839451
gen_1379	AGAATTGGAAGGAGCTTAGGGGAAAGCTAGCCTCAGGTCAGAATTGCCTGCATGCCACTCGGCTAGTGAGCTGCTGAATCACCTTATTCCTGGAGAAAGATTTTGTTTTTTATTTTATTTTATTTTATTTTATTTTATTTTATTTTATTTTATTTTATTTAATTTACTTTATTATTATTATTATTATTATTATTATTATT	030	regLM	96	0.132055	0.283284	0.389214	0.0814379	0.283241	0.569883
gen_1380	CCCGAATACTGTGCTTTTCCGACGGGCTTAGGAAACGGCACACCAGGATATTATATCCTGCACCTGGCTCGGAGGGTCCTACGTGCACGGAGTCTCGCTGATTGCTAGCACAGAAGTCTGAGATCAAACTGCAAGGCGGCAGCGAGGCTGGGGGAGGGGTGCCCGCCATTGCCCAGGCTTGCTTAGGTAAACAGAGTAGC	030	regLM	96	0.99346	0.0693264	1.27554	2.11562	0.0692898	0.094172
gen_1381	CCTCAGAATTAATGGAGAGGGCCAGTGGCGGCCTGTGCCCTTTGTCCCACCGGCCGGCCTGGGGGTGGCGGCTCCAGAATACAGGGTCCTATTGTGTGCCCTGATGTCAGGCAGCTGGACTGCTGGGAGTGAGGATAAACAAGCAGCTGGAGCATCTCGCCTGAAGCCCCAGGAGAGGGCCAGAGCCCCTGAAGATGGAG	030	regLM	98	2.59974	-0.0169745	1.32209	2.11393	-0.0169533	1.43653
gen_1382	GTTTAGCGTAAGAATCAGGGTCCAGCTGGTGCTCCCTAAACAGCAGCTGCTGTTCACTGTTGAAAGGCGCTCTGGAAGGCCAGGTGCGGTGGCTCATGCTTGTAATCCCAGCACTGTGGGAGGCCGAGGTGGGCGGATCATGAGGTCAGGAGATCGAGACCATCCTGGCTAACACGGTGAAACCCCGTCTCTACTAAAAA	030	regLM	66	0.444099	1.75011	1.43311	0.939765	1.75004	0.412919
gen_1383	AGAAAAAAACAAACAACCCCATCAACAAGTGGGCGAAGGATATGAACAGACACTTCTCAAAAGAAGATATTTATTCAACCAAAAGACACATGAAAAAATACTCATCATCACTGGCCATCAGAGAAATGCAAATCAAAACCACAATGAGATACCATCTCACACCAGTTAGAATGGCGATCATTAAAAAGTCAGGAAACCAC	030	regLM	43	-0.491759	0.723727	0.113113	-0.230101	0.72382	-0.336385
gen_1384	CCTGAGAAAGGCTTCAACTAAAGAGCTATGGACAGGGACACTCTGTCACTTCCTGGGATTTTGACCCCCAGCTGTCCAACAGAGGAGGGTCTGTGCCTTTGCTCATTAGCCTAACTTAGATGATAGGTGACAAACTGAAGTGAGCTATGGGGAGAGGTACCTCATTTATCTGTTGCTGGGTGTTGAATAATGTCCGGCAC	030	regLM	27	-0.219138	0.125088	-0.610227	-0.268627	0.12505	-0.766846
gen_1385	CTGTTTGTGCTGTGTGTTTCCAATAATTGACAACATATGTGATTTTGTTATTCTACACTGAGCTTGCTTCGTCTGCATATTCATTAAAAAAGAATTTTTAAAATCTTTGTCAGATGTTCTACATCTGAATCATCTTCTAGTATTAAACCACAGCCAAGAACTTTTATATCTTTTATCACATTAATATAAAGATTCATGCA	030	regLM	93	-0.312007	-0.767733	3.34735	0.346531	-0.767688	1.56254
gen_1386	TCTCTGCTCCCCAGAGTCCCTGCACGTGGCTTGACAGTGGCCTTGGTAGGACCCACTGGGGTGTTTCTTCGTCGCCCATGGGCCCTCATGCTGTTATCAGTTGGAAATGAATCAGAGATTAGGAAGCGGGGGGAGTGGTGGGGGTGTTATCGCCCAGTGCACACAGGTTACCACAGACATTTAGCCCTCACAGGAAATGG	030	regLM	22	1.46968	5.59947	-0.13417	1.35847	5.59951	0.38306
gen_1387	AGAATTGGAAGGAGCTTAGGGGAAAGCTAGCCTCAGGTCAGAATTGCCTGCATGCCACTCGGCTAGTGAGCTGCTGAATCACCTTATTCCTGGAGAAAGATTTTGTTTTTTATTTTATTTTATTTTATTTTATTTTATTTTATTTTATTTTATTTTATTTTATTTTATTTTATTTAACATAAGACTTTGAATTCTGTGAT	030	regLM	97	0.213481	0.240585	0.561292	0.227842	0.240479	0.869406
gen_1388	CTAGCTGTACCAGCCGCTGCCCCGGACCTGCTGCCCTGCCCCACGCACCCCCCCTCCCCTGGCCAGCCTCCCCAGAGGCCAGAAGGCGCCTTATCGGGCAGGGTTAAGGAGGGGGACAGTTATCAGGGGCTGCAGCCTAGATTGGGCCACAATGTCCTCGTCTCTTGAGGGTGGCAGGCTGTGCAGGCTCCCAGACCAGG	030	regLM	12	0.344639	3.92721	0.447006	0.165729	3.92708	0.535697
gen_1389	ACTGGGATTGCTTGGTTGAATGGTAGTTCCATTTTTAGTTCTTTGAGAAATCTCCAAACTGCTTTCCACAGCAGCTTAACTAATTTACATTCCCACCAGCACTGTCTTAAGTGTTTCCTTTTCTCCGCAGCCTTGCCAACATCTGTAATTTTTTGACTTTTTAATGATATTCTTTATGACTGGTGCAGGATGGTATCTCA	030	regLM	53	0.0902215	0.610787	0.587035	0.280384	0.610695	0.560254
gen_1390	GACTCCCGCATGCTGTACTTCTGGTTCTCTGAGCGAGTCTTCCACTCGCTGGCCAAGGTAGCTTTCCAGGATGGCCGCCTCATGCTCAGCCTGATGGGAGACGAGTTCAAGGTGAGTGGGTGGGGCTGGGCTGCTAGGGGATCCAGATGGCATGTGGTATGTGTGTGTGTGCACACGCATGGGGAGGAGGGAGGAAGCTG	030	regLM	98	1.98545	1.78808	0.431164	1.13501	1.78811	1.18692
gen_1391	TCTCTGCTCCCCGGAGTCCCTGCACGTGGCTTGACAGTGGCCTTGGTAGGACCCACTGGGGTGTTTCTTCGTCGCCCATGGGCCCTCATGCTGTTATCAATTGGAAATGAATCAGAGATTAGGAAGCGGGGGGAGTGGTGGGGGTGTTATCGCCCAGTGCACACAGGTTACCACAGATGGAATGAGGGAATGGGGGGAAA	030	regLM	23	0.123592	2.24876	-0.956865	0.0159121	2.24852	-0.564367
gen_1392	TCTCTGCTCCCCAGAGTCCCTGCACGTGGCTTGACAGTGGCCTTGGTAGGACCCACTGGGGTGTTTCTTCGTCGCCCATGGGCCCTCATGCTGTTATCAGTTGGAAATGAATCAGAGATTAGGAAGCGGGGGGAGTGGTGGGGGTGTTATCGCCCAGTGCACACAGGTTACCACAGATGGAATAAGGGAAGCCAAGGAGA	030	regLM	23	0.559417	4.94239	-0.612174	0.173929	4.94241	-0.402492
gen_1393	CCTGAGAAAGGCTTCAACTAAAGAGCTATGGACAGGGACACTCTGTCACTTCCTGGGATTTTGACCCCCAGCTGTCCAACAGAGGAGGGTCTGTGCCTTTGCTCATTAGCCTAACTTAGATGATAGGTGACAAACTGAAGTGAGCTATAGGGAGTTGTCCACTTCCAGGCTGTTATCCATCCAGCTGGGCAATAAGTACA	030	regLM	12	-0.0151406	0.406693	-0.517335	-0.153333	0.406766	-0.706159
gen_1394	AAACAAATTATGTAGAAGCCAAACCATTTTACTTCCCTCACTGTAGACCACACATAGCAACACAGTCTGTGTCTTTGTTCATGTTTTTAGAATTCCATCCACAGAGAGGAGAAAATACATCTGGGGAATTTGCCGCTGCTCTGAGTTCCAAAGTCCAAACCAATGTAATTGTTTCAGAATAACCTTTGGTACCAGGCATG	030	regLM	100	4.96706	0.199555	0.26219	4.5379	0.19953	1.05723
gen_1395	CCATCTGTTCCATCCTCACCCACCCAAGGAGCCGCCCCTGCTCCTAGAGACTCTGGGCACCACTGATAAGGGTGGGTACCAGGAACTCCACCCTTTACCGAGAAAGGCAGGCTGGTTTATCGCCACTCAGACCCAGCCAGCGACCACCCTGGGGAGTGTGTCAGCCACCAGGAGCATCGCTGTTGGGGAAATGCTAGGGC	030	regLM	84	-0.0370788	7.35376	0.477883	0.0211905	7.35375	1.26437
gen_1396	GTTTAGCGTAAGAATCAGGGTCCAGCTGGTGCTCCCTAAACAGCAGCTGCTGTTCACTGTTGAAAGGCGCTCTGGAAGGCCAGGTGCGGTGGCTCATGCTTGTAATCCCAGCACTGTGGGAGGCCGAGGTGGGCGGATCACCTGAGGTAAGGAGTTCGAGACCAGCCTGACCAACGTGGAGAAACCCCATCTCTCCTATA	030	regLM	62	0.130137	2.48707	3.15577	0.291147	2.4871	0.810801
gen_1397	CCTGAGAAAGGCTTCAACTAAAGAGCTATGGACAGGGACACTCTGTCACTTCCTGGGATTTTGACCCCCAGCTGTCCAACAGAGGAGGGTCTGTGCCTTTGCTCATTAGCCTAACTTAGATGATAGGTGACAAACTGAAATGAGCTATAGGGAGTTGTCCACTTCCAGGCTGCTATCAGTCCTTCAGATGTTTTTATCAT	030	regLM	13	-0.114892	2.60348	-0.633441	-0.175871	2.60335	-0.674025
gen_1398	AGAAAAAAACAAACAACCCCATCAACAAGTGGGCGAAGGATATGAACAGACACTTCTCAAAAGAAGATATTTATTCAACCAAAAGACACATGAAAAAATGCTCATCATCACTGGCCATCAGAGAAATGCAAATCAAAACCACAATGAGATACCATCTCACACCAGTTAGAATGGCGATCATTGAAAAGTCAGGAAGCGAC	030	regLM	45	-0.433672	1.04871	0.082861	-0.157063	1.04881	-0.335468
gen_1399	CATGTTGCCTATGGTATTATAAGAATTGAAAGAAGGCCAGGCGCAGTGGCTCACACCTGTAATCCCAGCACTTTGGGAGGCTGAGGCAGGCAGATCACTTGAGGTCAGGAGTTCGAGACCAGCCTGGCCAACATGGTGAAACCCTGTCTCTACTAAAAATACAAAAATTAGCCAGGCATGGTGGTGCACACCTGTAATCC	030	regLM	43	-0.219944	3.45342	3.44895	-0.0428854	3.45343	1.30249
gen_1400	TCATTTGAAGATGGAGGCAGAGATTGGAGTGATACAACTATAAGTCAGGGAATGCCAAGGACTTGAGGTCATGTGTTACAGAAGCCCTAGGAAATGAGTCAATTTCCTGGCACAGCACTAAGACATGCTGGTATTCTTCATTCCATCCCTTTCCCCTATTCCTAAATGTGCTCCAGGAACATTTGGTTTTGCAAGCTCTG	030	regLM	96	0.635871	-0.147577	5.38054	2.9511	-0.147537	5.79588
gen_1401	CCTGAGAAAGGCTTCAACTAAAGAGCTATGGACAGGGACACTCTGTCACTTCCTGGGATTTTGACCCCCAGCTGTCCAACAGAGGAGGGTCTGTGCCTTCGCTCATTAGCCTAACTTAGATGATAGGTGACAAACTGAAGTGAGCTATGGGAATGGTTATGGCCAATTTGACCTCTGTGTTCCCTGAAAAAAATATATTT	030	regLM	31	-0.128793	-0.0528028	-0.394727	-0.287557	-0.0527717	-0.526254
gen_1402	ATTAGCATGGAATTTGGACTTTGGAGCCATAATCCTGTTGTCTTCTTTCATTTAAAGAATATGGGCCGGGCGCGGTGGCTCACGCCTGTAATCCCAGCACTTTGGGAGGCCGAGGCAGGTGGATCATGAGGTCAGGAGATCGAGACCATCCTGGCTAACACAGTGAAACCCTGTCTCTACTAAAAATACAAAAAAATTAG	030	regLM	58	0.123641	3.06035	1.46869	0.823999	3.06032	1.40794
gen_1403	ATTATGATACAGTCCAAGTATGTAACTTTCTGGGGACCAGACTTTGCTGAGAGTCATAATGGAGAGTCAAAGAGTCTGATGGCTGAGAGGGATGTGCCTGGGCTTGCCTTCATAAATGTTCATTGTCTCAGCCAAGGTTTTGGCAGGAGCGAGAACAGCCTCTGGTAGGAGCTGGCGTGATTCCAGAGGCCTGACAGGGG	030	regLM	97	2.11897	0.124429	5.77149	2.39681	0.124624	4.79595
gen_1404	CTCAGAATTAATGGAGAGGGCCAGTGGCGGCCTGTGCCCTTTGTCCCACTGGCCGGCCTGGGGGTGGCGGCTCCAGAATACAGGGTCCTATTGTGTGCCCTGATGTCAGGCAGCTGGACTGCTGGGAGTGAGGATAAACAAGCAGCTGGAGCATCTCGCCTGAAGCCCCAGGAGAGGGCCAGAGCCCCTGCAGCAGCAAG	030	regLM	96	2.8996	0.0364341	1.37472	2.24618	0.0364571	1.23894
gen_1405	CTCAGAATTAATGGAGAGGGCCAGTGGCGGCCTGTGCCCTTTGTCCCACTGGCCGGCCTGGGGGTGGCGGCTCCAGAATACAGGGTCCTATTGTGTGCCCTGATGTCAGGCAGCTGGACTGCTGGGAGTGAGGATAAACAAGCAGCTGGAGCATCTCGCCTGAAGCCCCAGGAGAGGGCCAGAGCCCCTCCCCCAGCCTG	030	regLM	98	3.39889	0.946527	2.17545	2.72146	0.946501	1.53774
gen_1406	TGCACCCCCCCATCATTTTCTTCATTTGTATAATGAGGCTAATACCATGTGTACAACACCGCCGAAATGTACTGGCAGCTCCATATTTCCTTCTCTTATCTCATATTCATCTTTCCACATCTCCCATGAGAGTTTCTCAAGCTGATTAAATTCCTATCCAACATATGTCAGATACATAATTGGTGCCGGGTGAAGGCCAC	030	regLM	95	-0.122544	0.3925	1.79814	0.109332	0.392509	-0.371933
gen_1407	GTTTAGCGTAAGAATCAGGGTCCAGCTGGTGCTCCCTAAACAGCAGCTGCTGTTCACTGTTGAAAGGCGCTCTGGAAGGCCAGGCGCGGTGGCTCATGCTTGTAATCCCAGCACTGTGGGAGGCCGAGGTGGGCGGATCACCTGAGGTAAGGAGTTCGAGACCAGCCTGACCAACGTGGAGAAACCCCGTCTCTACTAAA	030	regLM	63	0.474536	3.0871	4.12968	0.815102	3.08716	1.93001
gen_1408	GATTTTTCTACTGCTAGGTTTTCCTTTTGGGGTTACGATTATTACAGGTGGCAATCAGTTAACTTAGTGGTTCTGTAGGCACCGCCCTATCTTCCAACTCACTTACATTTAAAAATTCACACAGAGAGGCTAGTGGGAAGCGGGTAGGTGTAAACAATGTGCTACAGTGAGAAACCTGAAGGCTGTAAATACTGTACTGT	030	regLM	100	0.537609	1.56054	0.0512786	0.347447	1.56046	0.15142
gen_1409	TCTCTGCTCCCCAGAGTCCCTGCACGTGGCTTGACAGTGGCCTTGGTAGGACCCACTGGGGTGTTTCTTCGTCGCCCATGGGCCCTCATGCTGTTATCAGTTGGAAATGAATCAGAGATTAGGAAGCGGGGGGAGTGGTGGGGGTGTTATCGCCCAGTGCACACAGGTTACCACAGACATTTAGCCCTCAGGGGGAAAGG	030	regLM	23	0.995738	4.62637	-0.457668	0.474142	4.62639	-0.191571
gen_1410	CCAGTAATGGGATGGCTGGGTCCAATGGTATTTCTAGTTCTAGATCCCTGAGGAATCGCCACACTGACTTCCACAATGGTTGAACTAGTTTACAGTCCCACCAACAGTGTGTAATGGTTCCTCTTTCTCCACATCCTCTCCAGCACCTGTTGTTTCCTGACTTTTTAATGATTGCCATTCTAACTGGTGTGAGATGGTAT	030	regLM	10	-0.481547	0.784355	-0.516162	-0.00222072	0.784383	-0.401378
gen_1411	CCTGAGAAAGGCTTCAACTAAAGAGCTATGGACAGGGACACTCTGTCACTTCCTGGGATTTTGACCCCCAGCTGTCCAACAGAGGAGGGTCTGTGCCTTTGCTCATTAGCCTAACTTAGATGATAGGTGACAAACTGAAGTGAGCTATGGGGAGAGGTACCTCATTTATCTGTTGCTGGGTGTTGCATTTACTCAGTGGG	030	regLM	27	-0.110757	0.64163	-0.563258	-0.287933	0.641747	-0.717585
gen_1412	GTTTAGCGTAAGAATCAGGGTCCAGCTGGTGCTCCCTAAACAGCAGCTGCTGTTCACTGTTGAAAGGCGCTCTGGAAGGCCAGGTGCGGTGGCTCATGCTTGTAATCCCAGCACTGTGGGAGGCCGAGGTGGGCGGATCACCTGAGGTAAGGAGTTCGAGATCAGCCTGACCAACGTGGAGAAACCCCATCTCTCCTAAA	030	regLM	63	0.170805	2.19375	2.31171	0.400641	2.19387	0.208454
gen_1413	ACTGGGATTGCTTGGTTGAATGGTAGTTCCATTTTTAGTTCTTTGAGAAATCTCCAAACTGCTTTCCACAGCAGCTTAACTAATTTACATTCCCACCAGCACTGTCTTAAGTGTTTCCTTTTCTCCGCAGCCTTGCCAACATCTGTAATTTTTTGACTTTTTAATGATATTCTTTTTGATAATAGCCATTCTAACTGGTG	030	regLM	62	0.0931492	0.440213	0.699768	0.302512	0.440269	0.663286
gen_1414	CCAGTAATGGGATGGCTGGGTCCAATGGTATTTCTAGTTCTAGATCCCTGAGGAATTGCCACACTGACTTCCACAATGGTTGAACTAGTTTACAGTCCCGCCAACAGTGTAAAATTATTCCTATTTCTCCACATCCTCTCCAGCACCTGTTGTTTCCTGACTTTTTAATGATCGCCATTCTAACTGGTGTGAGATGGTGT	030	regLM	6	-0.549005	0.22989	-0.534364	-0.109537	0.229974	-0.514192
gen_1415	GAACTGCTGGGTTGGGTACCTGCCAGTGTTCAGGCAGCAGTTACATAAGAGCTGCTTTTTTTCCTGGAATTTAGGCTCACTGCTGATGTGTGACCTTCAGCAGTAATTGCCAGTAAATGCAGTGGGGCTGTTTACTGTTAGACACTGGCAACCACAGAGCAAACTCAACTCAGAACATACAGAACCTATTACAAAGCTCA	030	regLM	99	3.92294	0.940794	0.244466	3.46527	0.940812	0.124453
gen_1416	TCTCTGCTCCCCGGAGTCCCTGCACGTGGCTTGACAGTGGCCTTGGTAGGACCCACTGGGGTGTTTCTTCGTCGCCCATGGGCCCTCATGCTGTTATCAGTTGGAAATGAATCAGAGATTAGGAAGCGGGGGGAGTGGTGGGGGTGGTATTAGCGTTGGGGGAGGAAGTTGCAAAGAACTGGGAGGTACCCTCCATTTCC	030	regLM	31	2.18672	5.76034	2.1279	1.59682	5.76035	1.95292
gen_1417	TCTCTGCTCCCCAGAGTCCCTGCACGTGGCTTGACAGTGGCCTTGGTAGGACCCACTGGGGTGTTTCTTCGTCGCCCATGGGCCCTCATGCTGTTATCAATTGGAAATGAATCAGAGATTAGGAAGCGGGGGGAGTGGTGGGGGTGTTATCGCCCAGTGCACACAGGTTACCACAGAGGTCACACGGTAGGTGAGGGGAA	030	regLM	22	0.326423	3.50415	-1.23874	0.296017	3.50433	-0.613258
gen_1418	GATTTTTCTACTGCTAGGTTTTCCTTTTGGGGTTACGATTATTACAGGTGGCAATCAGTTAACTTAGTGGTTCTGTAGGCACCGCCCTATCTTCCAACTCACTTACATTTAAAAATTCACACAGAGAGGCTAGTGGGAAGCTGTATTCAGAAATCTAGAGGCTAGAAAACTTGTAATCTCAGCACTTTGGGAGGCTGAGG	030	regLM	98	0.262761	0.156836	0.198704	-0.0092733	0.156857	0.0261852
gen_1419	GAAAGGATACTCTGGCTGTCATGTGGACTGGAGGGAGCTGGAATTGAGGCAGTGAGCCCAGCTACCAGAGTCTTGAAATAGTTTAGTGTAAGATGCTGAATCATGAGTTGGGGCAGAGAGGATAACAAAGTAGGGAAGTGGGGGTAGAGACAGTCGTAAGACCTGAGGAGGGAATGGGGGAACAAGGAGACAATGAGGAG	030	regLM	95	0.100711	2.28487	0.699206	0.0360584	2.2845	0.365475
gen_1420	ATTATGATACAGTCCAAGTATGTAACTTTCTGGGGACCAGACTTTGCTGAGAGTCATAATGGAGAGTCAAAGAGTCTGATGGCTGAGAGGGATGTGCCTGGGCTTGCCTTCATAAATGTTCATTGTCTCAGCCAAGGTTTTGGCAGGAGCGAGAGCAGGCTCAGATCAGTGTCACAGGCAGTACCTTACGTGGCTTGAGA	030	regLM	95	2.43111	0.135583	6.33929	2.5669	0.135597	4.04387
gen_1421	CTCTCTATTACATTCCATTCTCCATTCCATTCCCATACATTCTCCACTCCACTGCATTCTCTATTCCATTCTCCATTCCATTCCACTCCTTTCCGCATTCCTTTCCATTCTCCATTACATTCCATTCTCCATTACATTCCATTCTCCCGTCCATTTTTCACTCCATTCCATTCCATTCTCCGTTCCATTCCATTCCATTC	030	regLM	88	-0.704564	-0.212804	3.39459	0.0146578	-0.212834	0.127406
gen_1422	GTTTAGCGTAAGAATCAGGGTCCAGCTGGTGCTCCCTAAACAGCAGCTGCTGTTCACTGTTGAAAGGCGCTCTGGAAGGCCAGGTGCGGTGGCTCATGCTTGTAATTCCAGCACTGTGGGAGGCCGAGGAGGGTGGATCACCTGAGGTAAGGAGTTCAAGACCAGCCTGACCAACGTGGAGAAACCCCATCTCTCCTAAA	030	regLM	62	-0.0269824	1.5772	1.95933	0.0599566	1.57719	-0.199627
gen_1423	CCCGAATACTGTGCTTTTCCGACGGGCTTAGGAAACGGCACACCAGGATATTATATCCTGCACCTGGCTCGGAGGGTCCCACGCCCACGGAGTCTCGCTGATTGCTAGCACAGAAGTCTGAGATCAAACTGCAAGGCGGCAGCGAGGCTGGGGGAGGGGTGCCCGCCATTGCCCAGGCTTGCTTAGGTAAACAGAGCAGC	030	regLM	98	1.13253	0.229734	1.47407	2.07776	0.229722	0.626954
gen_1424	CCTGAGAAAGGCTTCAACTAAAGAGCTATGGACAGGGACACTCTGTCACTTCCTGGGATTTTGACCCCCAGCTGTCCAACAGAGGAGGGTCTGTGCCTTTGCTCATTAGCCTAACTTAGATGATAGGTGACAAACTGAAGTGAGCTATAGGGAGTTGTCCACTTCTGGGCTTATACATATTTCCTAACTGGCTGTTGAAA	030	regLM	15	-0.0305894	0.541153	-0.379552	-0.299913	0.541137	-0.663514
gen_1425	GTTTAGCGTAAGAATCAGGGTCCAGCTGGTGCTCCCTAAACAGCAGCTGCTGTTCACTGTTGAAAGGCGCTCTGGAAGGCCAGGTGCGGTGGCTCATGCTTGTAATCCCAGCACTGTGGGAGGCCGAGGTGGGCGGACCACCTGAGGTAAGGAGTTCGAGACCAGCCTGACCAACGTGGAGAAACCCCATCTCTCCTAAA	030	regLM	63	0.0698338	2.45789	3.40617	0.29726	2.4579	0.710517
gen_1426	GATTTTTCTACTGCTAGGTTTTCCTTTTGGGGTTACGATTATTACAGGTGGCAATCAGTTAACTTAGTGGTTCTGTAGGCACCGCCCTATCTTCCAACTCACTTACATTTAAAAATTCACACAGAGAGGCTAGTGGGAAGCGGGTAGGTGTAAACAATGTGCTACAGTGAGTCACACCCGTCACAAAAGCCAACAATGAC	030	regLM	100	2.79194	3.30429	0.131828	2.22806	3.30428	0.845987
gen_1427	GATTTTTCTACTGCTAGGTTTTCCTTTTGGGGTTACGATTATTACAGGTGGCAATCAGTTAACTTAGTGGTTCTGTAGGCACCGCCCTATCTTCCAACTCACTTACATTTAAAAATTCACACAGAAAGATTGATCTCTCTATCTCTCTCTCTCTCTCTCTCTCTCTCTCTCTCTCTCTCTCTCTCTCTCTCTCTCTCTCT	030	regLM	79	0.620491	2.86849	0.158628	-0.0156438	2.86866	-0.115885
gen_1428	CCTGAGAAAGGCTTCAACTAAAGAGCTATGGACAGGGACACTCTGTCACTTCCTGGGATTTTGACCCCCAGCTGTCCAACAGAGGAGGGTCTGTGCCTTCGCTCATTAGCCTAACTTAGATGATAGGTGACAAACTGAAGTGAGCTATGGGGAGAGGTACCTCATTTATCTGTTGCTGGGTGTGTCACACCGGGCTAATT	030	regLM	28	-0.0690474	1.67388	-0.523949	-0.210222	1.67387	-0.838835
gen_1429	AGAATTGGAAGGAGCTTAGGGGAAAGCTAGCCTCAGGTCAGAATTGCCTGCATGCCACTCGGCTGGCTAGTGAGCTGCTGAATCACCTTATTCCTGGAGAAAGACTTTGATACTGAGAAAACTGACTTGCTCAGCTCTTGCTACAACTGTGACCATCTCTGCAACAGTTTTCTGTTGTTTAAGAGGTTCATGGAAGTTAA	030	regLM	97	0.123025	1.03655	0.566707	0.0040273	1.03662	0.456344
gen_1430	CATGTTGCCTATGGTATTATAAGAATTGAAAGAAGGCCAGGCGCAGTGGCTCACACCTGTAATCCCAGCACTTTGGGAGGCCGAGGCGGGCAGATCACTTGAGGTCAGCAGTTCGAGACCAGCCTGGCCAACATGGTGAAACCCCATCTCTACTAAAAATACAAAAATTAGCCAGGCATGGTGGTGCACACCTGTAATCC	030	regLM	44	-0.184167	3.86922	3.07187	0.106829	3.86897	1.16269
gen_1431	CCTGAGAAAGGCTTCAACTAAAGAGCTATGGACAGGGACACTCTGTCACTTCCTGGGATTTTGACCCCCAGCTGTCCAACAGAGGAGGGTCTGTGCCTTCGCTCATTAGCCTAACTTAGATGATAGGTGACAAACTGAAGTGAGCTATAGGGAGTTGTCCACTTCCAGGCTGCTATCACTACAGCCCATCTGGAAGCAGT	030	regLM	12	-0.0456352	4.28527	-0.758567	-0.181481	4.28518	-0.711741
gen_1432	AGAATTGGAAGGAGCTTAGGGGAAAGCTAGCCTCAGGTCAGAATTGCCTGCATGCCACTCGGCTAGTGAGCTGCTGAATCACCTTATTCCTGGAGAAAGATTTTGTTTTTTATTTTATTTTATTTTATTTTATTTTATTTTATTTTATTTTATTTTATTTTATTTTATTTAACATAAGACTTTGAGATGGAGTCTCACTC	030	regLM	98	0.164489	0.281342	0.526804	0.235683	0.281383	0.831796
gen_1433	CTAGCTGTACCAGCCGCTGCCCCGGACCTGCTGCCCTGCCCCACGCACCCCCCCTCCCCTGGCCAGCCTCCCCAGAGGCCAGAAGGCGCCTTATCGGGCAGGGTTAAGGAGGGGGACAGTTATCAGGGGCTGCAGCCTAGATTGGGCCACAATGTCCTCGTCTCTTGAGGGTGGCAGGCTGTGCAGGCTCCCTGACCATG	030	regLM	11	0.387516	3.9412	0.451516	0.185243	3.94121	0.472953
gen_1434	CCTGAGAAAGGCTTCAACTAAAGAGCTATGGACAGGGACACTCTGTCACTTCCTGGGATTTTGACCCCCAGCTGTCCAACAGAGGAGGGTCTGTGCCTTTGCTCATTAGCCTAACTTAGATGATAGGTGACAAACTGAAGTGAGCTATAGGGAGTTGTCCACTTCCAGGCTGCTATCAGTCCATCCCCTTACCATTACAG	030	regLM	14	-0.0938543	1.74266	-0.828742	-0.154795	1.74272	-0.846367
gen_1435	AGAATTGGAAGGAGCTTAGGGGAAAGCTAGCCTCAGGTCAGAATTGCCTGCATGCCACTCGGCTAGTGAGCTGCTGAATCACCTTATTCCTGGAGAAAGATTTTGTTTTTTTATTTGAGATGGAGTTTTGCTCTTGTTGCCCAGGCTGGAGTGCAATGGTGCGATCTCGGCTCACTGCAACCTCTGCCTCCCGGGTTCAA	030	regLM	92	-0.0334559	-0.129776	0.512406	0.0911662	-0.129742	0.275879
[truncated: 13,564 more rows]

## Sheet: README
Supplemental Table S6: All synthetic human enhancer sequences generated by regLM.
