# Supplementary material for: Designing realistic regulatory DNA with autoregressive language models
Source: HighWire-hosted journal article supplement (doi:10.1101/gr.279142.124), 2024-09-01
Supplement: Supplemental_Table_S7.xlsx [file Supplemental_Table_S7.xlsx]

## Sheet: Supplemental_Table_S7
	Sequence	label	Group	edit	paired_hepg2_pred	paired_k562_pred	paired_sknsh_pred	independent_pred_hepg2	independent_pred_k562	independent_pred_sknsh
gen_3780	CCATCTGTTCCATCCTCACCCACCCAAGGAGCCGCCCCTGCTCCTAGAGACTCTGGGCACCACTGATAAGGGTGGGTACCAGGAACTCCACCCTTTACCGAGAAAGGCAGGCTGGTTTATCGCCACTCAGACCCAGCCAGCGACCACCCTGGGGAGTGTGTAAACAAAGGTGATACCTGTAATCCCAGCACTTTGGGAGG	030	regLM	95	-0.270784	6.64117	-0.423938	-0.0124428	6.64115	0.394283
gen_2124	CCTAGAGACTCTGGGCACCACTGATAAGGGTGGGTACCAGGAACTCCACCCTTTACCGAGAAAGGCAGGCTGGTTTATCGCCACTCAGACCCAGCCAGCGACCACCCTGGGGAGTGTGTCAGCCACCAGGAGCATCGCTGTTGGGGAAATGTTATTAACTAGGAAGGTTTTTGCCTCTGGCAGGTCAGTTGGCCACCAGA	030	regLM	21	-0.0445652	6.04112	-0.0502634	-0.0121246	6.04106	1.1518
gen_3278	GATGGGTGCCTCTCCATGGAGCTCACATGTCATACTGCGCCCTGACTCATCACATGTCATTGTTCCTTTGTATTAATTTTCTGTCATCTACAGTGAGTTCCTTGAGGGCAGGGAAAGGGCTTTTTATCTCTGCATTACCAGAGCCCAACAGATACACACTGGTTCTTATCAAACATATATATGTGTGTCTCATGACCCTG	030	regLM	22	0.094886	6.15887	0.00179505	0.131343	6.15882	0.0646033
gen_476	CCTAGAGACTCTGGGCACCACTGATAAGGGTGGGTACCAGGAACTCCACCCTTTACCGAGAAAGGCAGGCTGGTTTATCGCCACTCAGACCCAGCCAGCGACCACCCTGGGGAGTGTGTCAGCCACCAGGAGCATCGCTGTTGGGGAAATGTTATTAACTAGGAAGGTTTTTGCCTCTGGCAGGTCAGTTGGCCACCAGG	030	regLM	21	-0.0197534	6.02084	-0.0820436	0.000726223	6.02074	1.16536
gen_2605	CCTAGAGACTCTGGGCACCACTGATAAGGGTGGGTACCAGGAACTCCACCCTTTACCGAGAAAGGCAGGCTGGTTTATCGCCACTCAGACCCAGCCAGCGACCACCCTGGGGAGTGTGTCAGCCACCAGGAGCATCGCTGTTGGGGAAATGTTATTAACTAGGAAGGTTTTTGCCTCTGGCAGGTCAGTTGGCCACCAGT	030	regLM	20	-0.0399021	5.97403	-0.0295458	-0.0124462	5.97398	1.12756
gen_3546	CCTAGAGACTCTGGGCACCACTGATAAGGGTGGGTACCAGGAACTCCACCCTTTACCGAGAAAGGCAGGCTGGTTTATCGCCACTCAGACCCAGCCAGCGACCACCCTGGGGAGTGTGTCAGCCACCAGGAGCATCGCTGTTGGGGAAATGTTATTAACTAGGAAGGTTTTTGCCTCTGGCAGGTCAGTTGGCCACCAGC	030	regLM	21	-0.0193399	5.97725	-0.000576921	-0.0121017	5.97724	1.14683
gen_4870	CCTAGAGACTCTGGGCACCACTGATAAGGGTGGGTACCAGGAACTCCACCCTTTACCGAGAAAGGCAGGCTGGTTTATCGCCACTCAGACCCAGCCAGCGACCACCCTGGGGAGTGTGTCAGCCACCAGGAGCATCGCTGTTGGGGAAATGTTATTAACTAGGAAGGTTTTTGCCTCTGGCAGGTCAGTCGGCCACTAGG	030	regLM	22	0.0382256	6.01199	0.111988	0.0318623	6.01197	1.28898
gen_898	CCTAGAGACTCTGGGCACCACTGATAAGGGTGGGTACCAGGAACTCCACCCTTTACCGAGAAAGGCAGGCTGGTTTATCGCCACTCAGACCCAGCCAGCGACCACCCTGGGGAGTGTGTCAGCCACCAGGAGCATCGCTGTTGGGGAAATGTTATTAACTAGGAAGGTTTTTGCCTCTGGCAGGTTATTAAATATTGCTG	030	regLM	21	-0.0498876	5.87213	-0.0162236	-0.0815177	5.87214	1.21109
gen_3759	CCTAGAGACTCTGGGCACCACTGATAAGGGTGGGTACCAGGAACTCCACCCTTTACCGAGAAAGGCAGGCTGGTTTATCGCCACTCAGACCCAGCCAGCGACCACCCTGGGGAGTGTGTCAGCCACCAGGAGCATCGCTGTTGGGGAAATGTTATTAACTAGGAAGGTTTTTGCCTCTGGCAGGTTATTAAAAAATGCTC	030	regLM	20	-0.0328619	5.89595	0.0600124	-0.058648	5.89591	1.22197
gen_1788	CCTAGAGACTCTGGGCACCACTGATAAGGGTGGGTACCAGGAACTCCACCCTTTACCGAGAAAGGCAGGCTGGTTTATCGCCACTCAGACCCAGCCAGCGACCACCCTGGGGAGTGTGTCAGCCACCAGGAGCATCGCTGTTGGGGAAATGTTATTAACTAGGAAGGTTTTTGCCTCTGGCAGGTTATTAAATATTGTGG	030	regLM	22	-0.0487004	5.82832	0.00869524	-0.0839331	5.82834	1.19914
gen_4981	CCTAGAGACTCTGGGCACCACTGATAAGGGTGGGTACCAGGAACTCCACCCTTTACCGAGAAAGGCAGGCTGGTTTATCGCCACTCAGACCCAGCCAGCGACCACCCTGGGGAGTGTGTCAGCCACCAGGAGCATCGCTGTTGGGGAAATGTTATTAACTAGGAAGGTTTTTGCCTCTGGCAGGTCAGTCGGCCACTGTT	030	regLM	22	0.0647302	5.96674	0.164359	0.0252972	5.9667	1.31465
gen_4558	CCTAGAGACTCTGGGCACCACTGATAAGGGTGGGTACCAGGAACTCCACCCTTTACCGAGAAAGGCAGGCTGGTTTATCGCCACTCAGACCCAGCCAGCGACCACCCTGGGGAGTGTGTCAGCCACCAGGAGCATCGCTGTTGGGGAAATGTTATTAACTAGGAAGGTTTTTGCCTCTGGCAGGTCAGTCGGCCACTGGG	030	regLM	23	0.0627873	5.9585	0.172658	0.0268814	5.95846	1.32579
gen_3389	CCTAGAGACTCTGGGCACCACTGATAAGGGTGGGTACCAGGAACTCCACCCTTTACCGAGAAAGGCAGGCTGGTTTATCGCCACTCAGACCCAGCCAGCGACCACCCTGGGGAGTGTGTCAGCCACCAGGAGCATCGCTGTTGGGGAAATGTTATTAACTAGGAAGGTTTTTGCCTCTGGCAGGTCAGTCGGCCACTGTG	030	regLM	22	0.0682419	5.94616	0.18092	0.027429	5.94607	1.33143
gen_862	CCTAGAGACTCTGGGCACCACTGATAAGGGTGGGTACCAGGAACTCCACCCTTTACCGAGAAAGGCAGGCTGGTTTATCGCCACTCAGACCCAGCCAGCGACCACCCTGGGGAGTGTGTCAGCCACCAGGAGCATCGCTGTTGGGGAAATGTTATTAACTAGGAAGGTTTTTGCCTCTGGCAGGTTATTAAATATTAATC	030	regLM	20	0.142997	5.89919	0.121505	0.0221624	5.89916	1.17827
gen_2407	CCTAGAGACTCTGGGCACCACTGATAAGGGTGGGTACCAGGAACTCCACCCTTTACCGAGAAAGGCAGGCTGGTTTATCGCCACTCAGACCCAGCCAGCGACCACCCTGGGGAGTGTGTCAGCCACCAGGAGCATCGCTGTTGGGGAAATGTTATTAACTAGGAAGGTTTTTGCCTCTGGCAGGTTATTAAAAATTAATT	030	regLM	20	0.015098	5.88321	0.12736	-0.0637696	5.88309	1.26153
gen_3774	TCTCTGCTCCCCAGAGTCCCTGCACGTGGCTTGACAGTGGCCTTGGTAGGACCCACTGGGGTGTTTCTTCGTCGCCCATGGGCCCTCATGCTGTTATCAATTGGAAATGAATCAGAGATTAGGAAGCGGGGGGAGTGGTGGGGGTGTTATCGCCCAGTGCACACAGGTTACCACAGACGTTTATCAGTTCCTCCTTCAGG	030	regLM	21	0.039844	5.53141	-1.14175	0.460377	5.53137	-0.528088
gen_4438	GATGGGTGCCTCTCCATGGAGCTCACATGTCATACTGCGCCCTGACTCATCACATGTCATTGTTCCTTTGTATTAATTTTCTGTCATCTACAGTGAGTTCCTTGAGGGCAGGGAAAGGGCTTTTTATCTCTGCATTACCAGAGCCCAACAGATACACACTGGTTCTTATTAGTCTGCTTTAAAAAAAAAAAAAAAAAAAG	030	regLM	21	0.105261	5.5524	0.086567	0.433244	5.55247	0.398004
gen_3141	TCTCTGCTCCCCAGAGTCCCTGCACGTGGCTTGACAGTGGCCTTGGTAGGACCCACTGGGGTGTTTCTTCGTCGCCCATGGGCCCTCATGCTGTTATCAATTGGAAATGAATCAGAGATTAGGAAGCGGGGGGAGTGGTGGGGGTGTTATCGCCCAGTGCACACAGGTTACCACAGACGTTTATCAGTTCCTCCTTCAGA	030	regLM	21	0.0279402	5.3882	-1.18297	0.410203	5.38816	-0.531441
gen_2506	TCTCTGCTCCCCAGAGTCCCTGCACGTGGCTTGACAGTGGCCTTGGTAGGACCCACTGGGGTGTTTCTTCGTCGCCCATGGGCCCTCATGCTGTTATCAATTGGAAATGAATCAGAGATTAGGAAGCGGGGGGAGTGGTGGGGGTGTTATCGCCCAGTGCACACAGGTTACCACAGACATTTATCACTGGCCAAAAGGCA	030	regLM	20	-0.000707704	5.26736	-0.728476	0.0117083	5.26734	-0.326102
gen_2891	TCTCTGCTCCCCAGAGTCCCTGCACGTGGCTTGACAGTGGCCTTGGTAGGACCCACTGGGGTGTTTCTTCGTCGCCCATGGGCCCTCATGCTGTTATCAATTGGAAATGAATCAGAGATTAGGAAGCGGGGGGAGTGGTGGGGGTGTTATCGCCCAGTGCACACAGGTTACCACAGACATTTATCACTCACCGGGGACAC	030	regLM	21	0.0131402	5.26907	-0.564351	0.0189535	5.26907	-0.358801
gen_2964	TCTCTGCTCCCCGGAGTCCCTGCACGTGGCTTGACAGTGGCCTTGGTAGGACCCACTGGGGTGTTTCTTCGTCGCCCATGGGCCCTCATGCTGTTATCAATTGGAAATGAATCAGAGATTAGGAAGCGGGGGGAGTGGTGGGGGTGTTATCGCCCAGTGCACACAGGTTACCACAGACATTTATCACTGGCCAAAAGGCA	030	regLM	20	-0.00171856	5.24905	-0.674566	0.0116633	5.24915	-0.349207
gen_755	TCTCTGCTCCCCAGAGTCCCTGCACGTGGCTTGACAGTGGCCTTGGTAGGACCCACTGGGGTGTTTCTTCGTCGCCCATGGGCCCTCATGCTGTTATCAATTGGAAATGAATCAGAGATTAGGAAGCGGGGGGAGTGGTGGGGGTGTTATCGCCCAGTGCACACAGGTTACCACAGACATTTATCACTCACCGGGGACGC	030	regLM	20	0.0615651	5.29513	-0.434121	0.0494136	5.2952	-0.325821
gen_4777	TCTCTGCTCCCCAGAGTCCCTGCACGTGGCTTGACAGTGGCCTTGGTAGGACCCACTGGGGTGTTTCTTCGTCGCCCATGGGCCCTCATGCTGTTATCAATTGGAAATGAATCAGAGATTAGGAAGCGGGGGGAGTGGTGGGGGTGTTATCGCCCAGTGCACACAGGTTACCACAGACATTTATCACTCACCGGGGACAG	030	regLM	20	0.0349501	5.26417	-0.522658	0.0071361	5.26421	-0.361353
gen_2734	TCTCTGCTCCCCGGAGTCCCTGCACGTGGCTTGACAGTGGCCTTGGTAGGACCCACTGGGGTGTTTCTTCGTCGCCCATGGGCCCTCATGCTGTTATCAATTGGAAATGAATCAGAGATTAGGAAGCGGGGGGAGTGGTGGGGGTGTTATCGCCCAGTGCACACAGGTTACCACAGACATTTATCACTCACCGGGGACAC	030	regLM	21	0.0357491	5.2295	-0.54574	0.0170276	5.22955	-0.375667
gen_112	TCTCTGCTCCCCGGAGTCCCTGCACGTGGCTTGACAGTGGCCTTGGTAGGACCCACTGGGGTGTTTCTTCGTCGCCCATGGGCCCTCATGCTGTTATCAATTGGAAATGAATCAGAGATTAGGAAGCGGGGGGAGTGGTGGGGGTGTTATCGCCCAGTGCACACAGGTTACCACAGACATTTATCACTCACCGGGGACGC	030	regLM	20	0.0748026	5.25396	-0.414217	0.0467567	5.254	-0.354376
gen_100	TCTCTGCTCCCCAGAGTCCCTGCACGTGGCTTGACAGTGGCCTTGGTAGGACCCACTGGGGTGTTTCTTCGTCGCCCATGGGCCCTCATGCTGTTATCAATTGGAAATGAATCAGAGATTAGGAAGCGGGGGGAGTGGTGGGGGTGTTATCGCCCAGTGCACACAGGTTACCACAGACATTTATCACTGGCCAAAGGGAA	030	regLM	20	0.0129045	5.15511	-0.697196	0.00896309	5.15504	-0.363619
gen_2968	TCTCTGCTCCCCGGAGTCCCTGCACGTGGCTTGACAGTGGCCTTGGTAGGACCCACTGGGGTGTTTCTTCGTCGCCCATGGGCCCTCATGCTGTTATCAATTGGAAATGAATCAGAGATTAGGAAGCGGGGGGAGTGGTGGGGGTGTTATCGCCCAGTGCACACAGGTTACCACAGACATTTATCACTGGCCAAAGGGAA	030	regLM	20	0.00386557	5.12345	-0.622566	0.0162087	5.12339	-0.380155
gen_2942	GATGGGTGCCTCTCCATGGAGCTCACATGTCATACTGCGCCCTGACTCATCACATGTCATTGTTCCTTTGTATTAATTTTCTGTCATCTACAGTGAGTTCCTTGAGGGCAGGGAAAGGGCTTTTTATCTCTGCATTACCAGAGCCCAACAGATACACACTGGTTCTTATCAAACATTTATTACCTGGCTTGTCTTACCTC	030	regLM	21	-0.268536	4.83087	-0.625732	0.295642	4.83075	-0.481982
gen_3177	TCTCTGCTCCCCAGAGTCCCTGCACGTGGCTTGACAGTGGCCTTGGTAGGACCCACTGGGGTGTTTCTTCGTCGCCCATGGGCCCTCATGCTGTTATCAATTGGAAATGAATCAGAGATTAGGAAGCGGGGGGAGTGGTGGGGGTGTTATCGCCCAGTGCACACAGGTTACCACAGACATTTAGCCCTTTATCAGAGGCC	030	regLM	24	0.0378383	5.13235	-0.800126	0.0324637	5.13231	-0.494978
gen_3142	TCTCTGCTCCCCGGAGTCCCTGCACGTGGCTTGACAGTGGCCTTGGTAGGACCCACTGGGGTGTTTCTTCGTCGCCCATGGGCCCTCATGCTGTTATCAATTGGAAATGAATCAGAGATTAGGAAGCGGGGGGAGTGGTGGGGGTGTTATCGCCCAGTGCACACAGGTTACCACAGACATTTAGCCCTTTATCAGAGGCC	030	regLM	24	0.0461765	5.10924	-0.722025	0.0347873	5.1092	-0.492535
gen_4448	TCTCTGCTCCCCAGAGTCCCTGCACGTGGCTTGACAGTGGCCTTGGTAGGACCCACTGGGGTGTTTCTTCGTCGCCCATGGGCCCTCATGCTGTTATCAATTGGAAATGAATCAGAGATTAGGAAGCGGGGGGAGTGGTGGGGGTGTTATCGCCCAGTGCACACAGGTTACCACAGACATTTAGCCCTTTATCAGAGGCG	030	regLM	23	0.0160801	5.07784	-0.828159	0.0278337	5.07779	-0.501996
gen_2586	TCTCTGCTCCCCGGAGTCCCTGCACGTGGCTTGACAGTGGCCTTGGTAGGACCCACTGGGGTGTTTCTTCGTCGCCCATGGGCCCTCATGCTGTTATCAATTGGAAATGAATCAGAGATTAGGAAGCGGGGGGAGTGGTGGGGGTGTTATCGCCCAGTGCACACAGGTTACCACAGACATTTATCACTGGCCAAAAGGTA	030	regLM	20	-0.0635136	4.82307	-0.990939	-0.00513174	4.82307	-0.612333
gen_1669	TCTCTGCTCCCCAGAGTCCCTGCACGTGGCTTGACAGTGGCCTTGGTAGGACCCACTGGGGTGTTTCTTCGTCGCCCATGGGCCCTCATGCTGTTATCAATTGGAAATGAATCAGAGATTAGGAAGCGGGGGGAGTGGTGGGGGTGTTATCGCCCAGTGCACACAGGTTACCACAGACATTTAGCCCTTTATCAGATCCA	030	regLM	23	0.0378723	4.86544	-0.850005	0.0573577	4.86543	-0.491394
gen_2169	TCTCTGCTCCCCAGAGTCCCTGCACGTGGCTTGACAGTGGCCTTGGTAGGACCCACTGGGGTGTTTCTTCGTCGCCCATGGGCCCTCATGCTGTTATCAATTGGAAATGAATCAGAGATTAGGAAGCGGGGGGAGTGGTGGGGGTGTTATCGCCCAGTGCACACAGGTTACCACAGACGTTTATCAGTTGATGGGCACAT	030	regLM	22	0.0653525	4.8237	-1.33264	0.0443603	4.82369	-0.627394
gen_2871	TCTCTGCTCCCCAGAGTCCCTGCACGTGGCTTGACAGTGGCCTTGGTAGGACCCACTGGGGTGTTTCTTCGTCGCCCATGGGCCCTCATGCTGTTATCAATTGGAAATGAATCAGAGATTAGGAAGCGGGGGGAGTGGTGGGGGTGTTATCGCCCAGTGCACACAGGTTACCACAGACGTTTATCAGTTGATGGGCACAC	030	regLM	22	0.0450767	4.7998	-1.31356	0.0451986	4.79979	-0.613739
gen_1917	TCTCTGCTCCCCAGAGTCCCTGCACGTGGCTTGACAGTGGCCTTGGTAGGACCCACTGGGGTGTTTCTTCGTCGCCCATGGGCCCTCATGCTGTTATCAATTGGAAATGAATCAGAGATTAGGAAGCGGGGGGAGTGGTGGGGGTGTTATCGCCCAGTGCACACAGGTTACCACAGATGGAATAAACGTTCGTTGAAGAT	030	regLM	24	0.0530773	4.62173	-0.850346	-0.00806562	4.62174	-0.555863
gen_1611	TCTCTGCTCCCCAGAGTCCCTGCACGTGGCTTGACAGTGGCCTTGGTAGGACCCACTGGGGTGTTTCTTCGTCGCCCATGGGCCCTCATGCTGTTATCAATTGGAAATGAATCAGAGATTAGGAAGCGGGGGGAGTGGTGGGGGTGTTATCGCCCAGTGCACACAGGTTACCACAGATGGAATAAACGTTCGTTGAACAA	030	regLM	24	0.129297	4.67432	-0.8942	0.000692803	4.67436	-0.548075
gen_1016	TCTCTGCTCCCCAGAGTCCCTGCACGTGGCTTGACAGTGGCCTTGGTAGGACCCACTGGGGTGTTTCTTCGTCGCCCATGGGCCCTCATGCTGTTATCAATTGGAAATGAATCAGAGATTAGGAAGCGGGGGGAGTGGTGGGGGTGTTATCGCCCAGTGCACACAGGTTACCACAGACGTTTATCAGTTGATTGGATTTG	030	regLM	20	0.190877	4.69905	-0.810042	0.121098	4.69903	-0.529852
gen_313	TCTCTGCTCCCCGGAGTCCCTGCACGTGGCTTGACAGTGGCCTTGGTAGGACCCACTGGGGTGTTTCTTCGTCGCCCATGGGCCCTCATGCTGTTATCAATTGGAAATGAATCAGAGATTAGGAAGCGGGGGGAGTGGTGGGGGTGTTATCGCCCAGTGCACACAGGTTACCACAGACGTTTATCAGTTGATTGGATTTG	030	regLM	20	0.191966	4.69436	-0.833726	0.103906	4.69438	-0.555057
gen_2832	TCTCTGCTCCCCAGAGTCCCTGCACGTGGCTTGACAGTGGCCTTGGTAGGACCCACTGGGGTGTTTCTTCGTCGCCCATGGGCCCTCATGCTGTTATCAATTGGAAATGAATCAGAGATTAGGAAGCGGGGGGAGTGGTGGGGGTGTTATCGCCCAGTGCACACAGGTTACCACAGACGTTGAACCACTTTCCTGAGGAG	030	regLM	22	0.139316	4.62371	-0.846521	0.0399913	4.62372	-0.502738
gen_985	TCTCTGCTCCCCAGAGTCCCTGCACGTGGCTTGACAGTGGCCTTGGTAGGACCCACTGGGGTGTTTCTTCGTCGCCCATGGGCCCTCATGCTGTTATCAATTGGAAATGAATCAGAGATTAGGAAGCGGGGGGAGTGGTGGGGGTGTTATCGCCCAGTGCACACAGGTTACCACAGACGTTGAACCACTTTCCTGAGGAT	030	regLM	22	0.144658	4.62796	-0.910892	0.0332219	4.62801	-0.515347
gen_3499	TCTCTGCTCCCCGGAGTCCCTGCACGTGGCTTGACAGTGGCCTTGGTAGGACCCACTGGGGTGTTTCTTCGTCGCCCATGGGCCCTCATGCTGTTATCAATTGGAAATGAATCAGAGATTAGGAAGCGGGGGGAGTGGTGGGGGTGTTATCGCCCAGTGCACACAGGTTACCACAGACATTTAGCCCTCACTGGAGGAGT	030	regLM	21	0.193444	4.62273	-0.438865	0.0429088	4.62272	-0.270502
gen_4669	TCTCTGCTCCCCAGAGTCCCTGCACGTGGCTTGACAGTGGCCTTGGTAGGACCCACTGGGGTGTTTCTTCGTCGCCCATGGGCCCTCATGCTGTTATCAATTGGAAATGAATCAGAGATTAGGAAGCGGGGGGAGTGGTGGGGGTGTTATCGCCCAGTGCACACAGGTTACCACAGACATTTAGCCCTCACAGGAACCCT	030	regLM	22	0.177367	4.56107	-0.609651	0.0187257	4.56099	-0.332583
gen_333	TCTCTGCTCCCCAGAGTCCCTGCACGTGGCTTGACAGTGGCCTTGGTAGGACCCACTGGGGTGTTTCTTCGTCGCCCATGGGCCCTCATGCTGTTATCAATTGGAAATGAATCAGAGATTAGGAAGCGGGGGGAGTGGTGGGGGTGTTATCGCCCAGTGCACACAGGTTACCACAGACATTTAGCCCTCACTGCAGTTTC	030	regLM	20	0.193709	4.57403	-0.635994	0.0486484	4.57402	-0.265683
gen_4157	TCTCTGCTCCCCAGAGTCCCTGCACGTGGCTTGACAGTGGCCTTGGTAGGACCCACTGGGGTGTTTCTTCGTCGCCCATGGGCCCTCATGCTGTTATCAATTGGAAATGAATCAGAGATTAGGAAGCGGGGGGAGTGGTGGGGGTGTTATCGCCCAGTGCACACAGGTTACCACAGACATTTAGCCCTCACTGCAGTTTA	030	regLM	20	0.187367	4.55804	-0.674225	0.0252372	4.55807	-0.309706
gen_3003	TCTCTGCTCCCCGGAGTCCCTGCACGTGGCTTGACAGTGGCCTTGGTAGGACCCACTGGGGTGTTTCTTCGTCGCCCATGGGCCCTCATGCTGTTATCAATTGGAAATGAATCAGAGATTAGGAAGCGGGGGGAGTGGTGGGGGTGTTATCGCCCAGTGCACACAGGTTACCACAGACATTTAGCCCTCAGAGTTGGGGA	030	regLM	21	0.0767696	4.44573	-0.697573	0.00230099	4.44567	-0.431161
gen_618	TCTCTGCTCCCCGGAGTCCCTGCACGTGGCTTGACAGTGGCCTTGGTAGGACCCACTGGGGTGTTTCTTCGTCGCCCATGGGCCCTCATGCTGTTATCAATTGGAAATGAATCAGAGATTAGGAAGCGGGGGGAGTGGTGGGGGTGTTATCGCCCAGTGCACACAGGTTACCACAGACATTTAGCCCTCACAGGAACCCT	030	regLM	22	0.169738	4.52321	-0.556715	0.0252555	4.52321	-0.356313
gen_368	TCTCTGCTCCCCGGAGTCCCTGCACGTGGCTTGACAGTGGCCTTGGTAGGACCCACTGGGGTGTTTCTTCGTCGCCCATGGGCCCTCATGCTGTTATCAATTGGAAATGAATCAGAGATTAGGAAGCGGGGGGAGTGGTGGGGGTGTTATCGCCCAGTGCACACAGGTTACCACAGACATTTAGCCCTCACTGCAGTTTC	030	regLM	20	0.195024	4.52548	-0.593088	0.0531964	4.52547	-0.294548
gen_3549	TCTCTGCTCCCCGGAGTCCCTGCACGTGGCTTGACAGTGGCCTTGGTAGGACCCACTGGGGTGTTTCTTCGTCGCCCATGGGCCCTCATGCTGTTATCAATTGGAAATGAATCAGAGATTAGGAAGCGGGGGGAGTGGTGGGGGTGTTATCGCCCAGTGCACACAGGTTACCACAGACATTTAGCCCTCAGAGTTGGGGT	030	regLM	21	0.056795	4.38025	-0.770602	0.000356898	4.38035	-0.46132
gen_3096	TCTCTGCTCCCCAGAGTCCCTGCACGTGGCTTGACAGTGGCCTTGGTAGGACCCACTGGGGTGTTTCTTCGTCGCCCATGGGCCCTCATGCTGTTATCAATTGGAAATGAATCAGAGATTAGGAAGCGGGGGGAGTGGTGGGGGTGTTATCGCCCAGTGCACACAGGTTACCACAGATGGAATAAGGGAAGCCAAAGAGG	030	regLM	22	0.112221	4.29496	-0.629313	0.0222284	4.29515	-0.420073
gen_1715	TCTCTGCTCCCCAGAGTCCCTGCACGTGGCTTGACAGTGGCCTTGGTAGGACCCACTGGGGTGTTTCTTCGTCGCCCATGGGCCCTCATGCTGTTATCAATTGGAAATGAATCAGAGATTAGGAAGCGGGGGGAGTGGTGGGGGTGTTATCGCCCAGTGCACACAGGTTACCACAGACGGGGTGTCCACACAAGGAGGAA	030	regLM	24	0.105064	4.27226	-0.779183	0.0832604	4.2723	-0.562345
gen_1107	TCTCTGCTCCCCGGAGTCCCTGCACGTGGCTTGACAGTGGCCTTGGTAGGACCCACTGGGGTGTTTCTTCGTCGCCCATGGGCCCTCATGCTGTTATCAATTGGAAATGAATCAGAGATTAGGAAGCGGGGGGAGTGGTGGGGGTGTTATCGCCCAGTGCACACAGGTTACCACAGACACCTATCAGTCAATAAGATCAA	030	regLM	22	0.084213	4.24568	-1.21749	0.0552303	4.24552	-0.763002
gen_4028	TCTCTGCTCCCCAGAGTCCCTGCACGTGGCTTGACAGTGGCCTTGGTAGGACCCACTGGGGTGTTTCTTCGTCGCCCATGGGCCCTCATGCTGTTATCAATTGGAAATGAATCAGAGATTAGGAAGCGGGGGGAGTGGTGGGGGTGTTATCGCCCAGTGCACACAGGTTACCACAGATGGAATAAGGGAAGCCAAGGAGA	030	regLM	22	0.0131582	4.17417	-0.682012	-0.00538318	4.17416	-0.473214
gen_1131	TCTCTGCTCCCCAGAGTCCCTGCACGTGGCTTGACAGTGGCCTTGGTAGGACCCACTGGGGTGTTTCTTCGTCGCCCATGGGCCCTCATGCTGTTATCAATTGGAAATGAATCAGAGATTAGGAAGCGGGGGGAGTGGTGGGGGTGTTATCGCCCAGTGCACACAGGTTACCACAGATGGAATAAGGGAAGCCAAGCAGA	030	regLM	23	0.0958857	4.24682	-0.714501	0.0193863	4.2468	-0.397867
gen_1992	TCTCTGCTCCCCAGAGTCCCTGCACGTGGCTTGACAGTGGCCTTGGTAGGACCCACTGGGGTGTTTCTTCGTCGCCCATGGGCCCTCATGCTGTTATCAATTGGAAATGAATCAGAGATTAGGAAGCGGGGGGAGTGGTGGGGGTGTTATCGCCCAGTGCACACAGGTTACCACAGACGGGGTGTCCACACAAGGAAGAC	030	regLM	24	0.0800486	4.22469	-0.815034	0.0696435	4.22482	-0.599316
gen_3437	TCTCTGCTCCCCAGAGTCCCTGCACGTGGCTTGACAGTGGCCTTGGTAGGACCCACTGGGGTGTTTCTTCGTCGCCCATGGGCCCTCATGCTGTTATCAATTGGAAATGAATCAGAGATTAGGAAGCGGGGGGAGTGGTGGGGGTGTTATCGCCCAGTGCACACAGGTTACCACAGATGAAATGAGTGTGACTTGTTTCA	030	regLM	20	0.108751	4.21984	-1.01605	0.054032	4.21988	-0.544052
gen_3443	TCTCTGCTCCCCAGAGTCCCTGCACGTGGCTTGACAGTGGCCTTGGTAGGACCCACTGGGGTGTTTCTTCGTCGCCCATGGGCCCTCATGCTGTTATCAATTGGAAATGAATCAGAGATTAGGAAGCGGGGGGAGTGGTGGGGGTGTTATCGCCCAGTGCACACAGGTTACCACAGATGGAATAAGGGAAGCCAAGCAGG	030	regLM	22	0.115757	4.14322	-0.693565	0.0241341	4.14318	-0.403437
gen_3349	TCTCTGCTCCCCGGAGTCCCTGCACGTGGCTTGACAGTGGCCTTGGTAGGACCCACTGGGGTGTTTCTTCGTCGCCCATGGGCCCTCATGCTGTTATCAATTGGAAATGAATCAGAGATTAGGAAGCGGGGGGAGTGGTGGGGGTGTTATCGCCCAGTGCACACAGGTTACCACAGATGGAATGATGGATGAAATTATTC	030	regLM	21	-0.170773	3.83798	-0.754313	-0.133614	3.83797	-0.542104
gen_3565	TCTCTGCTCCCCAGAGTCCCTGCACGTGGCTTGACAGTGGCCTTGGTAGGACCCACTGGGGTGTTTCTTCGTCGCCCATGGGCCCTCATGCTGTTATCAATTGGAAATGAATCAGAGATTAGGAAGCGGGGGGAGTGGTGGGGGTGTTATCGCCCAGTGCACACAGGTTACCACAGATGGAATAAGGGAAGCCAAGCCAG	030	regLM	22	0.084045	4.08927	-0.676663	0.0114518	4.08932	-0.400286
gen_3607	TCTCTGCTCCCCGGAGTCCCTGCACGTGGCTTGACAGTGGCCTTGGTAGGACCCACTGGGGTGTTTCTTCGTCGCCCATGGGCCCTCATGCTGTTATCAATTGGAAATGAATCAGAGATTAGGAAGCGGGGGGAGTGGTGGGGGTGTTATCGCCCAGTGCACACAGGTTACCACAGACATTTAGCCCTCAGGAGATGAAT	030	regLM	22	0.120489	4.01784	-0.544859	0.0225829	4.01792	-0.366496
gen_4509	TCTCTGCTCCCCAGAGTCCCTGCACGTGGCTTGACAGTGGCCTTGGTAGGACCCACTGGGGTGTTTCTTCGTCGCCCATGGGCCCTCATGCTGTTATCAATTGGAAATGAATCAGAGATTAGGAAGCGGGGGGAGTGGTGGGGGTGTTATCGCCCAGTGCACACAGGTTACCACAGACGGGGTGTCCACACAAGGACAAA	030	regLM	24	0.16715	4.04506	-0.896882	0.0850018	4.04499	-0.590421
gen_4486	TCTCTGCTCCCCAGAGTCCCTGCACGTGGCTTGACAGTGGCCTTGGTAGGACCCACTGGGGTGTTTCTTCGTCGCCCATGGGCCCTCATGCTGTTATCAATTGGAAATGAATCAGAGATTAGGAAGCGGGGGGAGTGGTGGGGGTGTTATCGCCCAGTGCACACAGGTTACCACAGACGGGGTGTCCACACAAGGAAAAC	030	regLM	24	0.0791107	3.9314	-0.857851	0.0469436	3.93114	-0.566549
gen_568	TCTCTGCTCCCCGGAGTCCCTGCACGTGGCTTGACAGTGGCCTTGGTAGGACCCACTGGGGTGTTTCTTCGTCGCCCATGGGCCCTCATGCTGTTATCAATTGGAAATGAATCAGAGATTAGGAAGCGGGGGGAGTGGTGGGGGTGTTATCGCCCAGTGCACACAGGTTACCACAGACATTTAGCCCTCAGGAGATGAAG	030	regLM	21	0.128925	3.9717	-0.574416	0.0244042	3.97169	-0.375581
gen_4706	TCTCTGCTCCCCAGAGTCCCTGCACGTGGCTTGACAGTGGCCTTGGTAGGACCCACTGGGGTGTTTCTTCGTCGCCCATGGGCCCTCATGCTGTTATCAATTGGAAATGAATCAGAGATTAGGAAGCGGGGGGAGTGGTGGGGGTGTTATCGCCCAGTGCACACAGGTTACCACAGATGGAATAAGGGAAGCCAGGATCC	030	regLM	20	0.112268	3.95181	-0.611788	0.00369939	3.95099	-0.443021
gen_2764	TCTCTGCTCCCCAGAGTCCCTGCACGTGGCTTGACAGTGGCCTTGGTAGGACCCACTGGGGTGTTTCTTCGTCGCCCATGGGCCCTCATGCTGTTATCAATTGGAAATGAATCAGAGATTAGGAAGCGGGGGGAGTGGTGGGGGTGTTATCGCCCAGTGCACACAGGTTACCACAGATGGAATAAGGGAAGCCAAGCTGG	030	regLM	21	0.120374	3.95045	-0.66556	0.0173749	3.95028	-0.411662
gen_3624	TCTCTGCTCCCCAGAGTCCCTGCACGTGGCTTGACAGTGGCCTTGGTAGGACCCACTGGGGTGTTTCTTCGTCGCCCATGGGCCCTCATGCTGTTATCAATTGGAAATGAATCAGAGATTAGGAAGCGGGGGGAGTGGTGGGGGTGTTATCGCCCAGTGCACACAGGTTACCACAGATGGAATAAAGGCAGCTTCAGCTC	030	regLM	20	0.123628	3.61775	-0.586114	0.0299342	3.61776	-0.312472
gen_996	TCTCTGCTCCCCAGAGTCCCTGCACGTGGCTTGACAGTGGCCTTGGTAGGACCCACTGGGGTGTTTCTTCGTCGCCCATGGGCCCTCATGCTGTTATCAATTGGAAATGAATCAGAGATTAGGAAGCGGGGGGAGTGGTGGGGGTGTTATCGCCCAGTGCACACAGGTTACCACAGATGGAATAATGCAGGGAAGCAGGG	030	regLM	22	0.0584994	3.55245	-0.738345	0.016269	3.55219	-0.505336
gen_2445	TCTCTGCTCCCCAGAGTCCCTGCACGTGGCTTGACAGTGGCCTTGGTAGGACCCACTGGGGTGTTTCTTCGTCGCCCATGGGCCCTCATGCTGTTATCAATTGGAAATGAATCAGAGATTAGGAAGCGGGGGGAGTGGTGGGGGTGTTATCGCCCAGTGCACACAGGTTACCACAGATGGAATAATGCAGGGAAGGGGAG	030	regLM	21	0.026706	3.42923	-0.755105	0.0208876	3.42911	-0.542998
gen_2356	ACTGGGATTGCTTGGTTGAATGGTAGTTCCATTTTTAGTTCTTTGAGAAATCTCCAAACTGCTTTCCACAGCAGCTTAACTAATTTACATTCCTACCAACAGTGTAAAAATGTTCCCTTTTCTCCACATCCTCTCCAGTATCTGTTGTTTCCTGACTTTTTAATGATAGCCATTCTAACTGGTGTGAGATGGTATCTCAC	030	regLM	34	-0.261151	3.04846	-0.108874	0.0511998	3.04868	-0.00312533
gen_2209	ACTGGGATTGCTTGGTTGAATGGTAGTTCCATTTTTAGTTCTTTGAGAAATCTCCAAACTGCTTTCCACAGCAGCTTAACTAATTTACATTCCTACCAACAGTGTAAAAGTGTTCCTATTTCTCCACATCCTCTCCAGTATCTGTTGTTTCCTGACTTTTTAATGATAGCCATTCTAACTGGTGTGAGATGGTATCTCAT	030	regLM	32	-0.289518	3.09273	-0.0493387	-0.0318883	3.09298	-0.140896
gen_586	ACTGGGATTGCTTGGTTGAATGGTAGTTCCATTTTTAGTTCTTTGAGAAATCTCCAAACTGCTTTCCACAGCAGCTTAACTAATTTACATTCCTACCAACAGTGTAAAAATGTTCCCTTTTCTCCACATCCTCTCCAGTATCTGTTGTTTCCTGACTTTTTAATGATAGCCATTCTAACTGGTGTGAGATGGTATCTCAT	030	regLM	33	-0.265758	3.08064	-0.0518766	0.04141	3.0804	-0.022909
gen_4756	CCTGAGAAAGGCTTCAACTAAAGAGCTATGGACAGGGACACTCTGTCACTTCCTGGGATTTTGACCCCCAGCTGTCCAACAGAGGAGGGTCTGTGCCTTCGCTCATTAGCCTAACTTAGATGATAGGTGACAAACTGAAGTGAGCTATGGGGAGAGGTACCTCATTTATCAGTTGAAGTGACAGCTGAATTATGGGGTGG	030	regLM	27	-0.322093	2.38587	-0.6472	-0.310705	2.38561	-0.910298
gen_2331	AGAAAAAAACAAACAACCCCATCAACAAGTGGGCGAAGGATATGAACAGACACTTCTCAAAAGAAGATATTTATTCAACCAAAAGACACATGAAAAATTGCTCATCATTACTGGCCATCAGAGAAATGCAAATCAAAACCACAATGAGATACCATCTCACACCAGTTAGAATGGCGATCATTGAAAAGTCAGGAAGCAAC	030	regLM	44	-0.473021	2.58315	0.0431402	-0.240128	2.58291	-0.271171
gen_3222	CACACCACCATTACAACATCGATAACTGCCCAGTAACCATTTGGAATACCTCCAACAATGAGGAACAATATTTCTTGGACTCTCAGTTTATGATAAGTGCGCCTCTGTTGTCAGCCGGGAGCGGTGGCTCACGCCTGTAATCCCAGCACTTTGGGAGGCCGAGGCAGGTGGATCACCTGAGGTCAGGAGTTCGAGACCAG	030	regLM	89	0.0109793	2.49397	-0.205271	0.0563028	2.49383	-0.301129
gen_3117	AAACAAATTTATAAGAAAAAACAAACAACCCCATCAAAAAGTGGGTGAAGGATATGAACAGACACTTCTCAAAAGAAGATATTTATTCAACCAAAAAACACATGAAAAAGTGCTCATCATCACTGGCCATCAGAGAAATGCAAATCAAAACCACAATGAGATAACATCTCACACCAGTTAGACTGGCAAGCAGAGAAATA	030	regLM	28	-0.25789	2.34854	-0.0480264	-0.0226987	2.34865	-0.00555299
gen_3850	CCTGAGAAAGGCTTCAACTAAAGAGCTATGGACAGGGACACTCTGTCACTTCCTGGGATTTTGACCCCCAGCTGTCCAACAGAGGAGGGTCTGTGCCTTTGCTCATTAGCCTAACTTAGATGATAGGTGACAAACTGAAGTGAGCTATGGGGAGAGGTACCTCATTTATCTGTTGCTGGGTGTGTCACAGCAGGACACAC	030	regLM	27	-0.0338408	2.35563	-0.974721	-0.241106	2.35561	-0.925527
gen_1170	CACACCACCATTACAACATCGATAACTGCCCAGTAACCATTTGGAATACCTCCAACAATGAGGAACAATATTTCTTGGACTCTCAGTTTATGATAAGTGCGCCTCTGTTGTCAGCCGGGAGCGGTGGCTCATGCCTGTAATCCCAGCACTTTGGGAGGCCGAGGCAGGTGGATCACCTGAGGTCAGGAGTTCGAGACCAG	030	regLM	90	-0.0340222	2.34452	-0.138737	0.0513918	2.34439	-0.312031
gen_152	CCTGAGAAAGGCTTCAACTAAAGAGCTATGGACAGGGACACTCTGTCACTTCCTGGGATTTTGACCCCCAGCTGTCCAACAGAGGAGGGTCTGTGCCTTCGCTCATTAGCCTAACTTAGATGATAGGTGACAAACTGAAGTGAGCTATGGGGAGAGGTACCTCATTTATCTGTTGCTGGGTGTGTCACAGCTGGAGAGAG	030	regLM	25	0.028799	2.40383	-0.585449	-0.171761	2.40391	-0.763124
gen_1341	ACTGGGATTGCTTGGTTGAATGGTAGTTCCATTTTTAGTTCTTTGAGAAATCTCCAAACTGCTTTCCACAGCAGCTTAACTAATTTACATTCCCACCAACAGTGTAAAAGTGTTCCTATTTCTCCACATCCTCTCCAGTATCTGTTGTTTCCTGACTTTTTAATGATCACTATTCTAACTGGTGTGAGATGGTATCTCAT	030	regLM	30	-0.317102	2.36903	-0.00333283	-0.0645808	2.36904	-0.176495
gen_4774	CCTGAGAAAGGCTTCAACTAAAGAGCTATGGACAGGGACACTCTGTCACTTCCTGGGATTTTGACCCCCAGCTGTCCAACAGAGGAGGGTCTGTGCCTTCGCTCATTAGCCTAACTTAGATGATAGGTGACAAACTGAAGTGAGCTATGGGGAGAGGTACCTCATTTATCTGTTGCTGGGTGTGTCACAGCTGGAGAGAT	030	regLM	26	0.0111907	2.3786	-0.597622	-0.182098	2.37852	-0.775316
gen_4309	CCTGAGAAAGGCTTCAACTAAAGAGCTATGGACAGGGACACTCTGTCACTTCCTGGGATTTTGACCCCCAGCTGTCCAACAGAGGAGGGTCTGTGCCTTCGCTCATTAGCCTAACTTAGATGATAGGTGACAAACTGAAGTGAGCTATGGGGAGAGGTACCTCATTTATCTGTTGCTGGGTGTGTCACAGCTGGAGAGAC	030	regLM	25	0.0312557	2.36108	-0.56868	-0.178944	2.361	-0.758055
gen_1509	CCTGAGAAAGGCTTCAACTAAAGAGCTATGGACAGGGACACTCTGTCACTTCCTGGGATTTTGACCCCCAGCTGTCCAACAGAGGAGGGTCTGTGCCTTTGCTCATTAGCCTAACTTAGATGATAGGTGACAAACTGAAGTGAGCTATGGGGAGAGGTACCTCATTTATCTGTTGCTGGGTGTGTCACAGCAGGACACAT	030	regLM	27	-0.0661523	2.22456	-0.980392	-0.25947	2.22465	-0.934899
gen_3270	CCTGAGAAAGGCTTCAACTAAAGAGCTATGGACAGGGACACTCTGTCACTTCCTGGGATTTTGACCCCCAGCTGTCCAACAGAGGAGGGTCTGTGCCTTTGCTCATTAGCCTAACTTAGATGATAGGTGACAAACTGAAGTGAGCTATGGGGAGAGGTACCTCATTTATCTGTTGCTGGGTGTGTCACAGCAGGACACGG	030	regLM	27	-0.0602975	2.22951	-1.0143	-0.231764	2.22941	-0.943085
gen_1727	CCTGAGAAAGGCTTCAACTAAAGAGCTATGGACAGGGACACTCTGTCACTTCCTGGGATTTTGACCCCCAGCTGTCCAACAGAGGAGGGTCTGTGCCTTCGCTCATTAGCCTAACTTAGATGATAGGTGACAAACTGAAGTGAGCTATGGGGAGAGGTACCTCATTTATCTGTTGCTGGGTGTGTCACAGCTGGAGAGAA	030	regLM	25	0.015392	2.29367	-0.589164	-0.183497	2.29372	-0.761808
gen_3595	CCTGAGAAAGGCTTCAACTAAAGAGCTATGGACAGGGACACTCTGTCACTTCCTGGGATTTTGACCCCCAGCTGTCCAACAGAGGAGGGTCTGTGCCTTTGCTCATTAGCCTAACTTAGATGATAGGTGACAAACTGAAGTGAGCTATGGGGAGAGGTACCTCATTTATCTGTTGCTGGGTGTGTCACAGCAGGGGATCT	030	regLM	25	-0.128011	2.14546	-0.907186	-0.232367	2.14537	-0.930272
gen_1870	CCTGAGAAAGGCTTCAACTAAAGAGCTATGGACAGGGACACTCTGTCACTTCCTGGGATTTTGACCCCCAGCTGTCCAACAGAGGAGGGTCTGTGCCTTCGCTCATTAGCCTAACTTAGATGATAGGTGACAAACTGAAGTGAGCTATGGGGAGAGGTACCTCATTTATCTGTTGCTGGGTGTGTCACACCGGGCGAGGC	030	regLM	25	0.0716809	2.28252	-0.876834	-0.123679	2.28257	-0.839866
gen_697	CCTGAGAAAGGCTTCAACTAAAGAGCTATGGACAGGGACACTCTGTCACTTCCTGGGATTTTGACCCCCAGCTGTCCAACAGAGGAGGGTCTGTGCCTTCGCTCATTAGCCTAACTTAGATGATAGGTGACAAACTGAAGTGAGCTATGGGGAGAGGTACCTCATTTATCTGTTGCTGGGTGTGTCACAGCAGGGGATGT	030	regLM	25	-0.0952658	2.08879	-0.761796	-0.206097	2.08875	-0.863475
gen_422	AAACAAATTTATAAGAAAAAACAAACAACCCCATCAAAAAGTGGGTGAAGGATATGAACAGACACTTCTCAAAAGAAGATATTTATTCAACCAAAAGACACATGAAAAAATGCTCATCATCACTGGCCATCAGAGAAATGCAAATCAAAACCACAATGAGATAACATCTCACACCAGTTAGACTGGCAAGCAGGCAAAGG	030	regLM	31	-0.32023	2.00179	-0.173513	-0.0225302	2.00191	-0.0508349
gen_2243	TCTCTGCTCCCCAGAGTCCCTGCACGTGGCTTGACAGTGGCCTTGGTAGGACCCACTGGGGTGTTTCTTCGTCGCCCATGGGCCCTCATGCTGTTATCAGTTGGAAATGAATCAGAGATTAGGAAGCGGGGGGAGTGGTGGGGGTGGTATTGGGGCAAAAAGCCAAGGGGTGGTAAAAGCCACCTATCATTAGAGTGGGC	030	regLM	33	0.191337	2.35539	-0.503199	0.0457456	2.35554	-0.335881
gen_3516	CCTGAGAAAGGCTTCAACTAAAGAGCTATGGACAGGGACACTCTGTCACTTCCTGGGATTTTGACCCCCAGCTGTCCAACAGAGGAGGGTCTGTGCCTTTGCTCATTAGCCTAACTTAGATGATAGGTGACAAACTGAAGTGAGCTATGGGGAGAGGTACCTCATTTATCTGTTGCTGGGTGTGGCAAGACCTAAGGCTA	030	regLM	27	0.121018	2.28217	-0.870807	-0.189235	2.2822	-0.779763
gen_4791	CCTGAGAAAGGCTTCAACTAAAGAGCTATGGACAGGGACACTCTGTCACTTCCTGGGATTTTGACCCCCAGCTGTCCAACAGAGGAGGGTCTGTGCCTTTGCTCATTAGCCTAACTTAGATGATAGGTGACAAACTGAAGTGAGCTATGGGGAGAGGTACCTCATTTATCTGTTGCTGGGTGTGGCAAGACCTAAGGCTG	030	regLM	28	0.178988	2.33997	-0.844896	-0.179518	2.33995	-0.734638
gen_3331	AAACAAATTTATAAGAAAAAACAAACAACCCCATCAAAAAGTGGGTGAAGGATATGAACAGACACTTCTCAAAAGAAGATATTTATTCAACCAAAAGACACATGAAAAAATGCTCATCATCACTGGCCATCAGAGAAATGCAAATCAAAACCACAATGAGATAACATCTCACACCAGTTAGACTGGCAAGCAGAGAAATA	030	regLM	29	-0.327376	2.06016	-0.0960183	-0.059284	2.06029	-0.0962488
gen_305	CCTGAGAAAGGCTTCAACTAAAGAGCTATGGACAGGGACACTCTGTCACTTCCTGGGATTTTGACCCCCAGCTGTCCAACAGAGGAGGGTCTGTGCCTTTGCTCATTAGCCTAACTTAGATGATAGGTGACAAACTGAAGTGAGCTATGGGGAGAGGTACCTCATTTATCTGTTGCTGGGTGTGTCACAGCAGGGGATGT	030	regLM	25	-0.116847	2.03575	-0.956251	-0.261825	2.03578	-0.935966
gen_54	CCTGAGAAAGGCTTCAACTAAAGAGCTATGGACAGGGACACTCTGTCACTTCCTGGGATTTTGACCCCCAGCTGTCCAACAGAGGAGGGTCTGTGCCTTTGCTCATTAGCCTAACTTAGATGATAGGTGACAAACTGAAGTGAGCTATGGGGAGAGGTACCTCATTTATCTGTTGCTGGGTGTGGCAGGGCCTCTGGGGA	030	regLM	25	0.124654	2.27662	-0.800944	-0.136586	2.27673	-0.775016
gen_3591	CCTGAGAAAGGCTTCAACTAAAGAGCTATGGACAGGGACACTCTGTCACTTCCTGGGATTTTGACCCCCAGCTGTCCAACAGAGGAGGGTCTGTGCCTTTGCTCATTAGCCTAACTTAGATGATAGGTGACAAACTGAAGTGAGCTATGGGGAGAGGTACCTCATTTATCTGTTGCTGGGTGTGGCAGGGCCTCCAGGAA	030	regLM	26	0.163557	2.29094	-0.855604	-0.167223	2.29099	-0.732165
gen_1378	CCTGAGAAAGGCTTCAACTAAAGAGCTATGGACAGGGACACTCTGTCACTTCCTGGGATTTTGACCCCCAGCTGTCCAACAGAGGAGGGTCTGTGCCTTCGCTCATTAGCCTAACTTAGATGATAGGTGACAAACTGAAGTGAGCTATGGGGAGAGGTACCTCATTTATCTGTTGCTGGGTGTGTCACAGCAGGACATGT	030	regLM	27	-0.0415176	2.08441	-0.710157	-0.169475	2.08447	-0.839451
gen_1391	TCTCTGCTCCCCGGAGTCCCTGCACGTGGCTTGACAGTGGCCTTGGTAGGACCCACTGGGGTGTTTCTTCGTCGCCCATGGGCCCTCATGCTGTTATCAATTGGAAATGAATCAGAGATTAGGAAGCGGGGGGAGTGGTGGGGGTGTTATCGCCCAGTGCACACAGGTTACCACAGATGGAATGAGGGAATGGGGGGAAA	030	regLM	23	0.123592	2.24876	-0.956865	0.0159121	2.24852	-0.564367
gen_4092	CCTGAGAAAGGCTTCAACTAAAGAGCTATGGACAGGGACACTCTGTCACTTCCTGGGATTTTGACCCCCAGCTGTCCAACAGAGGAGGGTCTGTGCCTTTGCTCATTAGCCTAACTTAGATGATAGGTGACAAACTGAAGTGAGCTATGGGGAGAGGTACCTCATTTATCTGTTGCTGGGTGTGTCACAGCAGGACATGA	030	regLM	26	-0.0569736	2.05774	-0.950845	-0.258782	2.05782	-0.904601
gen_521	CCTGAGAAAGGCTTCAACTAAAGAGCTATGGACAGGGACACTCTGTCACTTCCTGGGATTTTGACCCCCAGCTGTCCAACAGAGGAGGGTCTGTGCCTTCGCTCATTAGCCTAACTTAGATGATAGGTGACAAACTGAAGTGAGCTATGGGGAGAGGTACCTCATTTATCTGTTGCTGGGTGTGTCACAGCAGGGGATGA	030	regLM	24	-0.0704607	2.03764	-0.752013	-0.211741	2.03776	-0.873412
gen_1485	CCTGAGAAAGGCTTCAACTAAAGAGCTATGGACAGGGACACTCTGTCACTTCCTGGGATTTTGACCCCCAGCTGTCCAACAGAGGAGGGTCTGTGCCTTTGCTCATTAGCCTAACTTAGATGATAGGTGACAAACTGAAGTGAGCTATGGGGAGAGGTACCTCATTTATCTGTTGCTGGGTGTGTCACAGCAGGACATGC	030	regLM	26	-0.0742873	2.0324	-0.954414	-0.242124	2.03233	-0.9125
gen_5039	TGATGGTTTCCAGCTTCATCCACGTCACTACAAAGGACATGAACTCATCATTTTTTATGCCAGCATAGTATTCCAGGGTGTATGTATGCCACATTTTCTAAATCCAGTCTATCATTGATGGACATTTCGGTTGGTTCCAAGTCTTTGCTATTGTGAATACTGCCACAATAAACATACATGTGCATGTGTCTTTATAGCAG	003	regLM	97	-0.465721	-0.204973	5.45348	-0.368067	-0.204977	-0.38423
gen_9381	TGATGGTTTCCAGCTTCATCCACGTCACTACAAAGGACATGAACTCATCATTTTTTATGCCAGCATAGTATTCCAGGGTGTATGTATGCCACATTTTCTAAATCCAGTCTATCATTGATGGACATTTCGGTTGGTTCCAAGTCTTTGCTATTGTGAATACTGCCACAATAAACATACATGTGCATGTGTCTTTATAGCAT	003	regLM	96	-0.447685	-0.194409	5.44414	-0.35579	-0.194392	-0.374683
gen_7475	TGATGGTTTCCAGCTTCATCCACGTCACTACAAAGGACATGAACTCATCATTTTTTATGCCAGCATAGTATTCCAGGGTGTATGTATGCCACATTTTCTAAATCCAGTCTATCATTGATGGACATTTCGGTTGGTTCCAAGTCTTTGCTATTGTGAATACTGCCACAATAAACATACATGTGCATGTGTCTTTTTAGCAG	003	regLM	98	-0.444884	-0.151509	5.35793	-0.307945	-0.151493	-0.356839
gen_8978	TGATGGTTTCCAGCTTCATCCACGTCACTACAAAGGACATGAACTCATCATTTTTTATGCCAGCATAGTATTCCAGGGTGTATGTATGCCACATTTTCTAAATCCAGTCTATCATTGATGGACATTTCGGTTGGTTCCAAGTCTTTGCTATTGTGAATACTGCCACAATAAACATACATGTGCATGTGTCTTTTGGGTAG	003	regLM	99	-0.49785	-0.193769	5.05542	-0.424617	-0.193792	-0.379589
gen_6045	TGATGGTTTCCAGCTTCATCCACGTCACTACAAAGGACATGAACTCATCATTTTTTATGCCAGCATAGTATTCCAGGGTGTATGTATGCCACATTTTCTAAATCCAGTCTATCATTGATGGGCATTTGGGTTGATTCCATGTCTTTGCTATTGTGAATACTGCCACAATAAACATACATGTGCATGTGTCTTTATAGCAG	003	regLM	96	-0.488431	-0.212012	4.93528	-0.346309	-0.211955	-0.398597
gen_6433	TCATTTGAAGATGGAGGCAGAGATTGGAGTGATACAACTATAAGTCAGGGAATGCCAAGGACTTGAGGTCATGTGTTACAGAAGCCCTAGGAAATGAGTCAATTTCCTAGCATAGTATAAAAGTTTTTTTATTATACCTAAAAACCTCATGGTTGTGTAAAAACCAGAGGACTGCAGTGAGTAATTCCTGGGAGGCAGAG	003	regLM	94	0.194346	-0.0434338	5.29758	2.27406	-0.0434425	5.18774
gen_5527	ACCCAGGTCATAAGCTGAAGAATGGAAGGAGATGCCAAAATGCTATGAATTCCACACTCAGAAATGCAGCTGGCAGCAAGCCCTCCCGCATTCCTCCCAAGTGAAGCAAACTCAGTTATGCGCATCTACACTAATTATCCCACATTGCTGGTGACCAGGCTTACTATAAATGTGGCCTATCTTTCTTTTAGAATCTTAAG	003	regLM	96	0.132724	0.123288	4.46802	0.477802	0.123301	2.53714
gen_8048	ACCCAGGTCATAAGCTGAAGAATGGAAGGAGATGCCAAAATGCTATGAATTCCACACTCAGAAATGCAGCTGGCAGCAAGCCCTCCCGCATTCCTCCCAAGTGAAGCAAACTCAGTTATGCGCATCTACACTAATTATCCCACATTGCTGGTGACCAGGCTTACTATAAATGTGGCCTATCTTTCTTTTAGAATCTTAAA	003	regLM	97	0.155506	0.123217	4.4803	0.492713	0.123139	2.54378
gen_5921	GAGGGCCTTCACCAGACACTGATCTCTGCCTTCCCATCTTTCAGAACTGCAAGAAATGAATGTCTGTTGTTTAACCCACATCTTGTTACAGCAGCCCACCCTGGGCAAGATAGTGCTATCCAAAGAAAAGGTAACAAGTCCAATTATTCACTACATTTTCACATATTTGAAAAGCGTATGCAAACAGTGTGTTCCCAGTA	003	regLM	98	-0.0395138	-0.0653219	4.18677	-0.119714	-0.0653599	-0.25273
gen_5344	AACAAATGGATAAATTCCCGGACACATACACCCTCCCAAAACTAACCCAGGAAGAAATTGAATCTCTGAATAGACCAATAACAGGCTCTGAAATGGAGGAAATAATTAAGAGCCTACCAACCAAAAAAAGTCCAGGACCAGATGGATTCACAGCCGAATTCTACCAGAGGTACAAGGAGGAGCTGGTACCATTCCTTCTG	003	regLM	100	-0.333315	-0.130988	4.09082	-0.0662605	-0.131003	-0.0619484
gen_7491	AGAAAAATGTTTTATTCTTGATCTTTGGAGCAAGCATAACCACCATCACTTCAAGTACACTGGCCACGACCCAACAGTTACTCCACGTCTCTGACTAAGCCTTCAGGATTCTTAGAACAAAAACCACAGAAACTTGGGCATTTTCCTAAATATGTCTTAGGTTTTGAGCCATTGCCAGACATGTTAAATTATTTAGAGTC	003	regLM	98	-0.149945	0.0352357	4.22884	0.654994	0.0352166	1.54168
gen_6457	AGAAAAATGTTTTATTCTTGATCTTTGGAGCAAGCATAACCACCATCACTTCAAGTACACTGGCCACGACCCAACAGTTACTCCACGTCTCTGACTAAGCCTTCAGGATTCTTAGAACAAAAACCACAGAAACTTGGGCATTTTCCTAAATATGTCTTAGGTTTTGAGCCATTGCCAGACATGTTAAATTATTTAGAGGC	003	regLM	99	-0.163793	0.02849	4.19306	0.653775	0.0284292	1.53763
gen_5266	AGAAAAATGTTTTATTCTTGATCTTTGGAGCAAGCATAACCACCATCACTTCAAGTACACTGGCCACGACCCAACAGTTACTCCACGTCTCTGACTAAGCCTTCAGGATTCTTAGAACAAAAACCACAGAAACTTGGGCATTTTCCTAAATATGTCTTAGGTTTTGAGCCATTGCCAGACATGTTAAAAGGCTCCAGATG	003	regLM	100	-0.117721	0.0538179	4.20852	0.652118	0.0536638	1.54009
gen_6071	AGAAAAATGTTTTATTCTTGATCTTTGGAGCAAGCATAACCACCATCACTTCAAGTACACTGGCCACGACCCAACAGTTACTCCACGTCTCTGACTAAGCCTTCAGGATTCTTAGAACAAAAACCACAGAAACTTGGGCATTTTCCTAAATATGTCTTAGGTTTTGAGCCATTGCCAGACATGTTAAATTATTTAGAGTT	003	regLM	98	-0.148221	0.0297319	4.17072	0.660654	0.0298486	1.50429
gen_7601	AGAAAAATGTTTTATTCTTGATCTTTGGAGCAAGCATAACCACCATCACTTCAAGTACACTGGCCACGACCCAACAGTTACTCCACGTCTCTGACTAAGCCTTCAGGATTCTTAGAACAAAAACCACAGAAACTTGGGCATTTTCCTAAATATGTCTTAGGTTTTGAGCCATTGCCAGACATGTTAAATTATTTAATGGT	003	regLM	98	-0.169765	-0.0503837	4.09036	0.647621	-0.0503159	1.42587
gen_9633	AGAAAAATGTTTTATTCTTGATCTTTGGAGCAAGCATAACCACCATCACTTCAAGTACACTGGCCACGACCCAACAGTTACTCCACGTCTCTGACTAAGCCTTCAGGATTCTTAGAACAAAAACCACAGAAACTTGGGCATTTTCCTAAATATGTCTTAGGTTTTGAGCCATTGCCAGACATGTTAAATTATTTAGAGAG	003	regLM	100	-0.150055	0.0526353	4.19006	0.65646	0.0526929	1.51407
gen_8609	AGAAAAATGTTTTATTCTTGATCTTTGGAGCAAGCATAACCACCATCACTTCAAGTACACTGGCCACGACCCAACAGTTACTCCACGTCTCTGACTAAGCCTTCAGGATTCTTAGAACAAAAACCACAGAAACTTGGGCATTTTCCTAAATATGTCTTAGGTTTTGAGCCATTGCCAGACATGTTAAATTATTTAATGGG	003	regLM	99	-0.171445	-0.0478442	4.08136	0.635203	-0.047745	1.42578
gen_6314	AGAAAAATGTTTTATTCTTGATCTTTGGAGCAAGCATAACCACCATCACTTCAAGTACACTGGCCACGACCCAACAGTTACTCCACGTCTCTGACTAAGCCTTCAGGATTCTTAGAACAAAAACCACAGAAACTTGGGCATTTTCCTAAATATGTCTTAGGTTTTGAGCCATTGCCAGACATGTTAAATTATTTAGAGAT	003	regLM	99	-0.17032	0.0283641	4.15471	0.643844	0.0284053	1.47464
gen_8375	AGAAAAATGTTTTATTCTTGATCTTTGGAGCAAGCATAACCACCATCACTTCAAGTACACTGGCCACGACCCAACAGTTACTCCACGTCTCTGACTAAGCCTTCAGGATTCTTAGAACAAAAACCACAGAAACTTGGGCATTTTCCTAAATATGTCTTAGGTTTTGAGCCATTGCCAGACATGTTAAATTATTTCCATTT	003	regLM	98	-0.112406	0.0356967	4.15983	0.708931	0.035777	1.63475
gen_9416	AACAAATGGATAAATTCCCGGACACATACACCCTCCCAAAACTAACCCAGGAAGAAATTGAATCTCTGAATAGACCAATAACAGGCTCTGAAATGGAGGAAATAATTAAGAGCCTACCAACCAAAAAAAGTCCAGGACCAGATGGATTCACAGCCGAATTCTACCAGAGGTACAAGGAGGAGCTGGTACCATTCCTTCTT	003	regLM	100	-0.342333	-0.124343	3.99105	-0.0718282	-0.124329	-0.0656798
gen_5358	AGAAAAATGTTTTATTCTTGATCTTTGGAGCAAGCATAACCACCATCACTTCAAGTACACTGGCCACGACCCAACAGTTACTCCACGTCTCTGACTAAGCCTTCAGGATTCTTAGAACAAAAACCACAGAAACTTGGGCATTTTCCTAAATATGTCTTAGGTTTTGAGCCATTGCCAGACATGTTAAATTATTTAATGTC	003	regLM	97	-0.170646	-0.0207671	4.09446	0.651323	-0.0207346	1.41076
gen_9891	AGAAAAATGTTTTATTCTTGATCTTTGGAGCAAGCATAACCACCATCACTTCAAGTACACTGGCCACGACCCAACAGTTACTCCACGTCTCTGACTAAGCCTTCAGGATTCTTAGAACAAAAACCACAGAAACTTGGGCATTTTCCTAAATATGTCTTAGGTTTTGAGCCATTGCCAGACATGTTAAATTATTTAGAGAC	003	regLM	99	-0.16459	0.0471027	4.1597	0.634722	0.0471163	1.5084
gen_7130	AGAAAAATGTTTTATTCTTGATCTTTGGAGCAAGCATAACCACCATCACTTCAAGTACACTGGCCACGACCCAACAGTTACTCCACGTCTCTGACTAAGCCTTCAGGATTCTTAGAACAAAAACCACAGAAACTTGGGCATTTTCCTAAATATGTCTTAGGTTTTGAGCCATTGCCAGACATGTTAAATTATTTAATCAT	003	regLM	97	-0.130262	0.0247532	4.13101	0.698302	0.0246172	1.57775
gen_8756	AGAAAAATGTTTTATTCTTGATCTTTGGAGCAAGCATAACCACCATCACTTCAAGTACACTGGCCACGACCCAACAGTTACTCCACGTCTCTGACTAAGCCTTCAGGATTCTTAGAACAAAAACCACAGAAACTTGGGCATTTTCCTAAATATGTCTTAGGTTTTGAGCCATTGCCAGACATGTTAAATTATTTCATGAA	003	regLM	98	-0.162387	-0.0277391	4.07086	0.624179	-0.0276875	1.47685
gen_5076	AGAAAAATGTTTTATTCTTGATCTTTGGAGCAAGCATAACCACCATCACTTCAAGTACACTGGCCACGACCCAACAGTTACTCCACGTCTCTGACTAAGCCTTCAGGATTCTTAGAACAAAAACCACAGAAACTTGGGCATTTTCCTAAATATGTCTTAGGTTTTGAGCCATTGCCAGACATGTTAAATTATTTAATGTT	003	regLM	97	-0.170335	-0.00797115	4.08977	0.636921	-0.00798613	1.38237
gen_5315	ACTCTCTATTACATTCCATTCTCCATTCCATTCCCATACATTCTCCACTCCACTGCATTCTCTATTCCATTCTCCATTCCATTCCACTCCTTTCCGCATTCCTTTCCATTCTCCATTGCATTCCATTCTCCATTGCATTCCATTCTCCATTGCATTCCATTCTCCATTGCATTCCCCTTTCCATATTTTATTCCATTCTA	003	regLM	60	-1.12932	-0.342121	3.74008	-0.203216	-0.342236	-0.0182181
gen_8664	ACTCTCTATTACATTCCATTCTCCATTCCATTCCCATACATTCTCCACTCCACTGCATTCTCTATTCCATTCTCCATTCCATTCCACTCCTTTCCGCATTCCTTTCCATTCTCCATTGCATTCCATTCTCCATTGCATTCCATTCTCCATTGCATTCCATTCTCCATTGCATTCCCCTTTCCATATTTTATTCCATTCTT	003	regLM	60	-1.16902	-0.362531	3.71963	-0.206801	-0.362483	-0.00937831
gen_8734	AGAAAAATGTTTTATTCTTGATCTTTGGAGCAAGCATAACCACCATCACTTCAAGTACACTGGCCACGACCCAACAGTTACTCCACGTCTCTGACTAAGCCTTCAGGATTCTTAGAACAAAAACCACAGAAACTTGGGCATTTTCCTAAATATGTCTTAGGTTTTGAGCCATTGCCAGACATGTTAAATTATTCCACTGC	003	regLM	98	-0.122195	0.120058	4.20116	0.65296	0.120029	1.67565
gen_8236	AGAAAAATGTTTTATTCTTGATCTTTGGAGCAAGCATAACCACCATCACTTCAAGTACACTGGCCACGACCCAACAGTTACTCCACGTCTCTGACTAAGCCTTCAGGATTCTTAGAACAAAAACCACAGAAACTTGGGCATTTTCCTAAATATGTCTTAGGTTTTGAGCCATTGCCAGACATGTTAAATGATTTATTTAA	003	regLM	98	-0.0153261	-0.0416903	4.06401	0.756705	-0.0416907	1.48978
gen_6721	AGAAAAATGTTTTATTCTTGATCTTTGGAGCAAGCATAACCACCATCACTTCAAGTACACTGGCCACGACCCAACAGTTACTCCACGTCTCTGACTAAGCCTTCAGGATTCTTAGAACAAAAACCACAGAAACTTGGGCATTTTCCTAAATATGTCTTAGGTTTTGAGCCATTGCCAGACATGTTAAATTATTCTGCCAA	003	regLM	98	-0.11833	-0.0428394	4.0311	0.583025	-0.0428472	1.55425
gen_9569	AGAAAAATGTTTTATTCTTGATCTTTGGAGCAAGCATAACCACCATCACTTCAAGTACACTGGCCACGACCCAACAGTTACTCCACGTCTCTGACTAAGCCTTCAGGATTCTTAGAACAAAAACCACAGAAACTTGGGCATTTTCCTAAATATGTCTTAGGTTTTGAGCCATTGCCAGACATGTTAAATTATTTCATGCA	003	regLM	97	-0.138754	0.0276196	4.10016	0.66	0.0275855	1.55915
gen_9798	AGAAAAATGTTTTATTCTTGATCTTTGGAGCAAGCATAACCACCATCACTTCAAGTACACTGGCCACGACCCAACAGTTACTCCACGTCTCTGACTAAGCCTTCAGGATTCTTAGAACAAAAACCACAGAAACTTGGGCATTTTCCTAAATATGTCTTAGGTTTTGAGCCATTGCCAGACATGTTAAATTATTTAATTTT	003	regLM	96	-0.180726	-0.0404667	4.03167	0.6192	-0.0404367	1.35271
gen_5295	AGAAAAATGTTTTATTCTTGATCTTTGGAGCAAGCATAACCACCATCACTTCAAGTACACTGGCCACGACCCAACAGTTACTCCACGTCTCTGACTAAGCCTTCAGGATTCTTAGAACAAAAACCACAGAAACTTGGGCATTTTCCTAAATATGTCTTAGGTTTTGAGCCATTGCCAGACATGTTAAATTATTTAATGTG	003	regLM	98	-0.151208	0.00137082	4.07062	0.631354	0.00142398	1.40656
gen_8581	AGAAAAATGTTTTATTCTTGATCTTTGGAGCAAGCATAACCACCATCACTTCAAGTACACTGGCCACGACCCAACAGTTACTCCACGTCTCTGACTAAGCCTTCAGGATTCTTAGAACAAAAACCACAGAAACTTGGGCATTTTCCTAAATATGTCTTAGGTTTTGAGCCATTGCCAGACATGTTAAATTATTTAATCTT	003	regLM	96	-0.155229	0.0278578	4.09529	0.662203	0.0279971	1.44744
gen_6216	AGAAAAATGTTTTATTCTTGATCTTTGGAGCAAGCATAACCACCATCACTTCAAGTACACTGGCCACGACCCAACAGTTACTCCACGTCTCTGACTAAGCCTTCAGGATTCTTAGAACAAAAACCACAGAAACTTGGGCATTTTCCTAAATATGTCTTAGGTTTTGAGCCATTGCCAGACATGTTAAATTATTCCAGGGA	003	regLM	100	-0.13155	0.065201	4.1297	0.617381	0.0651518	1.61696
gen_5181	AGAAAAATGTTTTATTCTTGATCTTTGGAGCAAGCATAACCACCATCACTTCAAGTACACTGGCCACGACCCAACAGTTACTCCACGTCTCTGACTAAGCCTTCAGGATTCTTAGAACAAAAACCACAGAAACTTGGGCATTTTCCTAAATATGTCTTAGGTTTTGAGCCATTGCCAGACATGTTAAATTATTTAATGTA	003	regLM	97	-0.173877	0.0161371	4.07855	0.61665	0.0161222	1.39756
gen_7555	AGAAAAATGTTTTATTCTTGATCTTTGGAGCAAGCATAACCACCATCACTTCAAGTACACTGGCCACGACCCAACAGTTACTCCACGTCTCTGACTAAGCCTTCAGGATTCTTAGAACAAAAACCACAGAAACTTGGGCATTTTCCTAAATATGTCTTAGGTTTTGAGCCATTGCCAGACATGTTAAATTATTTAAAGTC	003	regLM	97	-0.156938	0.0399859	4.09007	0.609638	0.0399724	1.52058
gen_9480	AGAAAAATGTTTTATTCTTGATCTTTGGAGCAAGCATAACCACCATCACTTCAAGTACACTGGCCACGACCCAACAGTTACTCCACGTCTCTGACTAAGCCTTCAGGATTCTTAGAACAAAAACCACAGAAACTTGGGCATTTTCCTAAATATGTCTTAGGTTTTGAGCCATTGCCAGACATGTTAAATTATTTCACGGT	003	regLM	100	-0.109872	0.0634347	4.11113	0.67481	0.0633983	1.58499
gen_9359	AGAAAAATGTTTTATTCTTGATCTTTGGAGCAAGCATAACCACCATCACTTCAAGTACACTGGCCACGACCCAACAGTTACTCCACGTCTCTGACTAAGCCTTCAGGATTCTTAGAACAAAAACCACAGAAACTTGGGCATTTTCCTAAATATGTCTTAGGTTTTGAGCCATTGCCAGACATGTTAAATTATTCCACTGA	003	regLM	98	-0.13824	0.103331	4.13677	0.627236	0.103336	1.65819
gen_5865	AGAAAAATGTTTTATTCTTGATCTTTGGAGCAAGCATAACCACCATCACTTCAAGTACACTGGCCACGACCCAACAGTTACTCCACGTCTCTGACTAAGCCTTCAGGATTCTTAGAACAAAAACCACAGAAACTTGGGCATTTTCCTAAATATGTCTTAGGTTTTGAGCCATTGCCAGACATGTTAAATTATTCTGCCTT	003	regLM	99	-0.140045	0.113034	4.14258	0.663164	0.112988	1.65899
gen_7461	AGAAAAATGTTTTATTCTTGATCTTTGGAGCAAGCATAACCACCATCACTTCAAGTACACTGGCCACGACCCAACAGTTACTCCACGTCTCTGACTAAGCCTTCAGGATTCTTAGAACAAAAACCACAGAAACTTGGGCATTTTCCTAAATATGTCTTAGGTTTTGAGCCATTGCCAGACATGTTAAATTATTCCACTGT	003	regLM	99	-0.13002	0.11367	4.14235	0.643074	0.113744	1.66313
gen_5414	AGAAAAATGTTTTATTCTTGATCTTTGGAGCAAGCATAACCACCATCACTTCAAGTACACTGGCCACGACCCAACAGTTACTCCACGTCTCTGACTAAGCCTTCAGGATTCTTAGAACAAAAACCACAGAAACTTGGGCATTTTCCTAAATATGTCTTAGGTTTTGGGAGGATTGCTTTCATAAAATTCCAAAGTGTTTG	003	regLM	99	-0.312296	0.114461	4.14029	0.617398	0.114475	1.73003
gen_7593	AGAAAAATGTTTTATTCTTGATCTTTGGAGCAAGCATAACCACCATCACTTCAAGTACACTGGCCACGACCCAACAGTTACTCCACGTCTCTGACTAAGCCTTCAGGATTCTTAGAACAAAAACCACAGAAACTTGGGCATTTTCCTAAATATGTCTTAGGTTTTGAGCCATTGCCAGACATGTTAAATTATTTCACCAG	003	regLM	98	-0.112298	0.0309767	4.05358	0.670241	0.0310051	1.55812
gen_8316	AGAAAAATGTTTTATTCTTGATCTTTGGAGCAAGCATAACCACCATCACTTCAAGTACACTGGCCACGACCCAACAGTTACTCCACGTCTCTGACTAAGCCTTCAGGATTCTTAGAACAAAAACCACAGAAACTTGGGCATTTTCCTAAATATGTCTTAGGTTTTGAGCCATTGCCAGACATGTTAAATTATTTCATAAA	003	regLM	98	-0.17509	-0.0364555	3.98235	0.669118	-0.0363371	1.3939
gen_9983	AGAAAAATGTTTTATTCTTGATCTTTGGAGCAAGCATAACCACCATCACTTCAAGTACACTGGCCACGACCCAACAGTTACTCCACGTCTCTGACTAAGCCTTCAGGATTCTTAGAACAAAAACCACAGAAACTTGGGCATTTTCCTAAATATGTCTTAGGTTTTGAGCCATTGCCAGACATGTTAAATTATTCAAGGGA	003	regLM	99	-0.0855795	0.169722	4.1822	0.678882	0.169674	1.79092
gen_8073	AGAAAAATGTTTTATTCTTGATCTTTGGAGCAAGCATAACCACCATCACTTCAAGTACACTGGCCACGACCCAACAGTTACTCCACGTCTCTGACTAAGCCTTCAGGATTCTTAGAACAAAAACCACAGAAACTTGGGCATTTTCCTAAATATGTCTTAGGTTTTGAGCCATTGCCAGACATGTTAAATTATTCTGCTTT	003	regLM	98	-0.14779	0.137855	4.14865	0.653768	0.138164	1.63795
gen_8244	AGAAAAATGTTTTATTCTTGATCTTTGGAGCAAGCATAACCACCATCACTTCAAGTACACTGGCCACGACCCAACAGTTACTCCACGTCTCTGACTAAGCCTTCAGGATTCTTAGAACAAAAACCACAGAAACTTGGGCATTTTCCTAAATATGTCTTAGGTTTTGAGCCATTGCCAGACATGTTAAATTATTTAATGAG	003	regLM	99	-0.150306	-0.0143769	3.99105	0.617671	-0.0143814	1.38759
gen_9424	ACTCTCTATTACATTCCATTCTCCATTCCATTCCCATACATTCTCCACTCCACTGCATTCTCTATTCCATTCTCCATTCCATTCCACTCCTTTCCGCATTCCTTTCCATTCTCCATTGCATTCCATTCTCCATTGCATTCCATTCTCCATTGCATTCCATTCTCCATTCCATTCCATTCTCCCTTCCATATTTTATTGCG	003	regLM	61	-1.02539	-0.311258	3.68629	-0.0959451	-0.311219	0.521054
gen_7437	AGAAAAATGTTTTATTCTTGATCTTTGGAGCAAGCATAACCACCATCACTTCAAGTACACTGGCCACGACCCAACAGTTACTCCACGTCTCTGACTAAGCCTTCAGGATTCTTAGAACAAAAACCACAGAAACTTGGGCATTTTCCTAAATATGTCTTAGGTTTTGAGCCATTGCCAGACATGTTAAATGATTTAATTTG	003	regLM	98	-0.088646	-0.0179933	3.97882	0.654745	-0.0178979	1.45716
gen_5583	AGAAAAATGTTTTATTCTTGATCTTTGGAGCAAGCATAACCACCATCACTTCAAGTACACTGGCCACGACCCAACAGTTACTCCACGTCTCTGACTAAGCCTTCAGGATTCTTAGAACAAAAACCACAGAAACTTGGGCATTTTCCTAAATATGTCTTAGGTTTTGAGCCATTGCCAGACATGTTAAATTATTCAATAAA	003	regLM	98	-0.135282	-0.0240642	3.9713	0.616559	-0.0240701	1.39935
gen_8874	AGAAAAATGTTTTATTCTTGATCTTTGGAGCAAGCATAACCACCATCACTTCAAGTACACTGGCCACGACCCAACAGTTACTCCACGTCTCTGACTAAGCCTTCAGGATTCTTAGAACAAAAACCACAGAAACTTGGGCATTTTCCTAAATATGTCTTAGGTTTTGAGCCATTGCCAGACATGTTAAATTATTTCACCAT	003	regLM	98	-0.0526158	-0.0170033	3.97264	0.749165	-0.0169907	1.55128
gen_6500	AGAAAAATGTTTTATTCTTGATCTTTGGAGCAAGCATAACCACCATCACTTCAAGTACACTGGCCACGACCCAACAGTTACTCCACGTCTCTGACTAAGCCTTCAGGATTCTTAGAACAAAAACCACAGAAACTTGGGCATTTTCCTAAATATGTCTTAGGTTTTGAGCCATTGCCAGACATGTTAAATTATTTAATATT	003	regLM	97	-0.196075	-0.00558469	3.98345	0.622781	-0.00552501	1.32693
gen_8631	AGAAAAATGTTTTATTCTTGATCTTTGGAGCAAGCATAACCACCATCACTTCAAGTACACTGGCCACGACCCAACAGTTACTCCACGTCTCTGACTAAGCCTTCAGGATTCTTAGAACAAAAACCACAGAAACTTGGGCATTTTCCTAAATATGTCTTAGGTTTTGAGCCATTGCCAGACATGTTAAATTATTCCACTTG	003	regLM	98	-0.166312	0.0994481	4.08125	0.586857	0.099394	1.57264
gen_9366	AGAAAAATGTTTTATTCTTGATCTTTGGAGCAAGCATAACCACCATCACTTCAAGTACACTGGCCACGACCCAACAGTTACTCCACGTCTCTGACTAAGCCTTCAGGATTCTTAGAACAAAAACCACAGAAACTTGGGCATTTTCCTAAATATGTCTTAGGTTTTGAGCCATTGCCAGACATGTTAAATTATTCAATAAG	003	regLM	99	-0.133874	0.0168571	3.99637	0.61897	0.0168954	1.45505
gen_6429	AGAAAAATGTTTTATTCTTGATCTTTGGAGCAAGCATAACCACCATCACTTCAAGTACACTGGCCACGACCCAACAGTTACTCCACGTCTCTGACTAAGCCTTCAGGATTCTTAGAACAAAAACCACAGAAACTTGGGCATTTTCCTAAATATGTCTTAGGTTTTGAGCCATTGCCAGACATGTTAAATTATTTAACATT	003	regLM	98	-0.135104	0.0563832	4.03466	0.642813	0.0563873	1.46438
gen_8463	AGAAAAATGTTTTATTCTTGATCTTTGGAGCAAGCATAACCACCATCACTTCAAGTACACTGGCCACGACCCAACAGTTACTCCACGTCTCTGACTAAGCCTTCAGGATTCTTAGAACAAAAACCACAGAAACTTGGGCATTTTCCTAAATATGTCTTAGGTTTTGAGCCATTGCCAGACATGTTAAATTATTTCACCAC	003	regLM	98	-0.0656102	0.00882268	3.98085	0.715719	0.00881385	1.5458
gen_5907	AGAAAAATGTTTTATTCTTGATCTTTGGAGCAAGCATAACCACCATCACTTCAAGTACACTGGCCACGACCCAACAGTTACTCCACGTCTCTGACTAAGCCTTCAGGATTCTTAGAACAAAAACCACAGAAACTTGGGCATTTTCCTAAATATGTCTTAGGTTTTGAGCCATTGCCAGACATGTTAAATTATTTAACATG	003	regLM	98	-0.130071	0.0591071	4.02952	0.633533	0.0590421	1.46961
gen_8483	AGAAAAATGTTTTATTCTTGATCTTTGGAGCAAGCATAACCACCATCACTTCAAGTACACTGGCCACGACCCAACAGTTACTCCACGTCTCTGACTAAGCCTTCAGGATTCTTAGAACAAAAACCACAGAAACTTGGGCATTTTCCTAAATATGTCTTAGGTTTTGAGCCATTGCCAGACATGTTAAATTATTCCACTTT	003	regLM	98	-0.157019	0.081129	4.04967	0.575112	0.0810693	1.58069
gen_9273	ACTCTCTATTACATTCCATTCTCCATTCCATTCCCATACATTCTCCACTCCACTGCATTCTCTATTCCATTCTCCATTCCATTCCACTCCTTTCCGCATTCCTTTCCATTCTCCATTGCATTCCATTCTCCATTGCATTCCATTCTCCATTGCATTCCATTCTCCATTCCATTCCATTCTCCCTTGCATATCCCATTATA	003	regLM	59	-1.11082	-0.343063	3.61722	-0.0863393	-0.343027	0.610035
gen_6132	ACTCTCTATTACATTCCATTCTCCATTCCATTCCCATACATTCTCCACTCCACTGCATTCTCTATTCCATTCTCCATTCCATTCCACTCCTTTCCGCATTCCTTTCCATTCTCCATTGCATTCCATTCTCCATTGCATTCCATTCTCCATTGCATTCCATTCTCCATTTTTTACACCCCATTCCATTCTCCCGTCCATTT	003	regLM	58	-0.882889	-0.205336	3.75215	-0.0279586	-0.205319	0.837954
gen_5131	AGAAAAATGTTTTATTCTTGATCTTTGGAGCAAGCATAACCACCATCACTTCAAGTACACTGGCCACGACCCAACAGTTACTCCACGTCTCTGACTAAGCCTTCAGGATTCTTAGAACAAAAACCACAGAAACTTGGGCATTTTCCTAAATATGTCTTAGGTTTTGAGCCATTGCCAGACATGTTAAATGATTTAACTAA	003	regLM	98	-0.0509188	0.0750467	4.02465	0.698403	0.0750501	1.55971
gen_5758	AGAAAAATGTTTTATTCTTGATCTTTGGAGCAAGCATAACCACCATCACTTCAAGTACACTGGCCACGACCCAACAGTTACTCCACGTCTCTGACTAAGCCTTCAGGATTCTTAGAACAAAAACCACAGAAACTTGGGCATTTTCCTAAATATGTCTTAGGTTTTGAGCCATTGCCAGACATGTTAAATGATTTAACTAC	003	regLM	98	-0.0408135	0.103912	4.05215	0.701235	0.103928	1.60358
gen_5644	ACTCTCTATTACATTCCATTCTCCATTCCATTCCCATACATTCTCCACTCCACTGCATTCTCTATTCCATTCTCCATTCCATTCCACTCCTTTCCGCATTCCTTTCCATTCTCCATTGCATTCCATTCTCCATTGCATTCCATTCTCCATTGCATTCCATTCTCCATTCCATTCCATTCTCCCTTCCATATTTTATTCCA	003	regLM	59	-1.08936	-0.294507	3.6528	-0.116813	-0.294528	0.473302
gen_6589	ACTCTCTATTACATTCCATTCTCCATTCCATTCCCATACATTCTCCACTCCACTGCATTCTCTATTCCATTCTCCATTCCATTCCACTCCTTTCCGCATTCCTTTCCATTCTCCATTGCATTCCATTCTCCATTGCATTCCATTCTCCATTGCATTCCATTCTCCATTCCATTCCATTCTCCCTTCCATATTTTATTCGG	003	regLM	61	-1.01665	-0.290662	3.65629	-0.110761	-0.290617	0.5339
gen_6726	AGAAAAATGTTTTATTCTTGATCTTTGGAGCAAGCATAACCACCATCACTTCAAGTACACTGGCCACGACCCAACAGTTACTCCACGTCTCTGACTAAGCCTTCAGGATTCTTAGAACAAAAACCACAGAAACTTGGGCATTTTCCTAAATATGTCTTAGGTTTTGAGCCATTGCCAGACATGTTAAAATATTGTATTTT	003	regLM	97	-0.214153	0.0163209	3.96206	0.60609	0.0163484	1.38829
gen_6506	ACTCTCTATTACATTCCATTCTCCATTCCATTCCCATACATTCTCCACTCCACTGCATTCTCTATTCCATTCTCCATTCCATTCCACTCCTTTCCGCATTCCTTTCCATTCTCCATTGCATTCCATTCTCCATTGCATTCCATTCTCCATTGCATTCCATTCTCCATTACATTCCATTCTCCCGTCCATTTTTCACTCCA	003	regLM	60	-0.894747	-0.231721	3.7132	0.0960564	-0.23176	1.25251
gen_8140	AGAAAAATGTTTTATTCTTGATCTTTGGAGCAAGCATAACCACCATCACTTCAAGTACACTGGCCACGACCCAACAGTTACTCCACGTCTCTGACTAAGCCTTCAGGATTCTTAGAACAAAAACCACAGAAACTTGGGCATTTTCCTAAATATGTCTTAGGTTTTGAGCCATTGCCAGACATGTTAAAATATTCTGGCTA	003	regLM	98	-0.134377	0.078086	4.01432	0.625446	0.0780841	1.60705
gen_9736	ACTCTCTATTACATTCCATTCTCCATTCCATTCCCATACATTCTCCACTCCACTGCATTCTCTATTCCATTCTCCATTCCATTCCACTCCTTTCCGCATTCCTTTCCATTCTCCATTGCATTCCATTCTCCATTGCATTCCATTCTCCATTGCATTCCATTCTCCATTCCATTCCATTCTCCCATTGTTTCATTCCCCGT	003	regLM	60	-0.850404	-0.267705	3.66788	0.0449588	-0.267699	1.12005
gen_9638	ACTCTCTATTACATTCCATTCTCCATTCCATTCCCATACATTCTCCACTCCACTGCATTCTCTATTCCATTCTCCATTCCATTCCACTCCTTTCCGCATTCCTTTCCATTCTCCATTGCATTCCATTCTCCATTGCATTCCATTCTCCATTGCATTCCATTCTCCATTCCATTCCATTCTCCCATTGTTTCATTCCTTTC	003	regLM	59	-0.8905	-0.289726	3.64158	0.0373841	-0.28979	1.15611
gen_8018	AGAAAAATGTTTTATTCTTGATCTTTGGAGCAAGCATAACCACCATCACTTCAAGTACACTGGCCACGACCCAACAGTTACTCCACGTCTCTGACTAAGCCTTCAGGATTCTTAGAACAAAAACCACAGAAACTTGGGCATTTTCCTAAATATGTCTTAGGTTTTGAGCCATTGCCAGACATGTTAAAATATTCTGGCAA	003	regLM	98	-0.148481	0.0298255	3.95962	0.57828	0.0298398	1.53976
gen_7595	ACTCTCTATTACATTCCATTCTCCATTCCATTCCCATACATTCTCCACTCCACTGCATTCTCTATTCCATTCTCCATTCCATTCCACTCCTTTCCGCATTCCTTTCCATTCTCCATTGCATTCCATTCTCCATTGCATTCCATTCTCCATTGCATTCCATTCTCCATTCCATTCCATTCTCCCATTGTTTCATTCCATCC	003	regLM	60	-0.922031	-0.310639	3.61653	0.00803355	-0.310563	0.997679
gen_5824	ACTCTCTATTACATTCCATTCTCCATTCCATTCCCATACATTCTCCACTCCACTGCATTCTCTATTCCATTCTCCATTCCATTCCACTCCTTTCCGCATTCCTTTCCATTCTCCATTGCATTCCATTCTCCATTGCATTCCATTCTCCATTGCATTCCATTCTCCATTCCATTCCATTCTCCCTTCCATATTTTATTCCT	003	regLM	59	-1.0735	-0.291598	3.63316	-0.106857	-0.291645	0.519721
gen_7052	ACTCTCTATTACATTCCATTCTCCATTCCATTCCCATACATTCTCCACTCCACTGCATTCTCTATTCCATTCTCCATTCCATTCCACTCCTTTCCGCATTCCTTTCCATTCTCCATTGCATTCCATTCTCCATTGCATTCCATTCTCCATTGCATTCCATTCTCCATTCCATTCCATTCTCCCTTCCATATTTTATTCCG	003	regLM	60	-1.08066	-0.282498	3.63698	-0.101045	-0.28248	0.530756
gen_9863	ACTCTCTATTACATTCCATTCTCCATTCCATTCCCATACATTCTCCACTCCACTGCATTCTCTATTCCATTCTCCATTCCATTCCACTCCTTTCCGCATTCCTTTCCATTCTCCATTGCATTCCATTCTCCATTGCATTCCATTCTCCATTGCATTCCATTCTCCATTCCATTCCATTCTCCCTTCCATATTTTATTCGC	003	regLM	61	-1.05624	-0.295936	3.62134	-0.0991468	-0.295823	0.517274
gen_6089	ACTCTCTATTACATTCCATTCTCCATTCCATTCCCATACATTCTCCACTCCACTGCATTCTCTATTCCATTCTCCATTCCATTCCACTCCTTTCCGCATTCCTTTCCATTCTCCATTGCATTCCATTCTCCATTGCATTCCATTCTCCATTGCATTCCATTCTCCATTCCATTCCATTCTCCCTTCCATATTTTATTCGT	003	regLM	60	-1.05256	-0.295819	3.61838	-0.106186	-0.295821	0.519393
gen_9132	AGAAAAATGTTTTATTCTTGATCTTTGGAGCAAGCATAACCACCATCACTTCAAGTACACTGGCCACGACCCAACAGTTACTCCACGTCTCTGACTAAGCCTTCAGGATTCTTAGAACAAAAACCACAGAAACTTGGGCATTTTCCTAAATATGTCTTAGGTTTTGAGCCATTGCCAGACATGTTAAATTATTTATTTAG	003	regLM	98	-0.0529101	0.0817638	3.99413	0.690671	0.0819052	1.47013
gen_8582	AGAAAAATGTTTTATTCTTGATCTTTGGAGCAAGCATAACCACCATCACTTCAAGTACACTGGCCACGACCCAACAGTTACTCCACGTCTCTGACTAAGCCTTCAGGATTCTTAGAACAAAAACCACAGAAACTTGGGCATTTTCCTAAATATGTCTTAGGTTTTGAGCCATTGCCAGACATGTTAAATTATTGGACCCT	003	regLM	99	-0.253833	0.0515535	3.96227	0.523229	0.051608	1.26196
gen_5652	ACTCTCTATTACATTCCATTCTCCATTCCATTCCCATACATTCTCCACTCCACTGCATTCTCTATTCCATTCTCCATTCCATTCCACTCCTTTCCGCATTCCTTTCCATTCTCCATTGCATTCCATTCTCCATTGCATTCCATTCTCCATTGCATTCCATTCTCCATTCCATTCCATTCTCCCATTGTTTCATTCCATTC	003	regLM	60	-0.873502	-0.289021	3.62041	0.0172038	-0.289067	1.0489
gen_5930	AGAAAAATGTTTTATTCTTGATCTTTGGAGCAAGCATAACCACCATCACTTCAAGTACACTGGCCACGACCCAACAGTTACTCCACGTCTCTGACTAAGCCTTCAGGATTCTTAGAACAAAAACCACAGAAACTTGGGCATTTTCCTAAATATGTCTTAGGTTTTGAGCCATTGCCAGACATGTTAAAATATTGTAAATG	003	regLM	99	-0.19202	-0.0176737	3.89074	0.601357	-0.0176175	1.36953
gen_8520	ACTCTCTATTACATTCCATTCTCCATTCCATTCCCATACATTCTCCACTCCACTGCATTCTCTATTCCATTCTCCATTCCATTCCACTCCTTTCCGCATTCCTTTCCATTCTCCATTGCATTCCATTCTCCATTGCATTCCATTCTCCATTGCATTCCATTCTCCATTCCATTCCATTCTCCCTTGCATAGCATAGCCTT	003	regLM	60	-1.07236	-0.312327	3.59454	-0.016689	-0.312262	0.888763
gen_8771	ACTCTCTATTACATTCCATTCTCCATTCCATTCCCATACATTCTCCACTCCACTGCATTCTCTATTCCATTCTCCATTCCATTCCACTCCTTTCCGCATTCCTTTCCATTCTCCATTGCATTCCATTCTCCATTGCATTCCATTCTCCATTGCATTCCATTCTCCATTCCATTCCATTCTCCCTTGCATATCCCATTCTC	003	regLM	59	-1.16506	-0.343986	3.56271	-0.0618423	-0.343987	0.678451
gen_8338	AGAAAAATGTTTTATTCTTGATCTTTGGAGCAAGCATAACCACCATCACTTCAAGTACACTGGCCACGACCCAACAGTTACTCCACGTCTCTGACTAAGCCTTCAGGATTCTTAGAACAAAAACCACAGAAACTTGGGCATTTTCCTAAATATGTCTTAGGTTTTGAGCCATTGCCAGACATGTTAAAATATTGTAGGAC	003	regLM	100	-0.192499	0.052639	3.95824	0.610742	0.0526871	1.46438
gen_9922	AGAAAAATGTTTTATTCTTGATCTTTGGAGCAAGCATAACCACCATCACTTCAAGTACACTGGCCACGACCCAACAGTTACTCCACGTCTCTGACTAAGCCTTCAGGATTCTTAGAACAAAAACCACAGAAACTTGGGCATTTTCCTAAATATGTCTTAGGTTTTGGGATACACGTTAGTTATATTTCATTGTTCAGATT	003	regLM	99	-0.544062	0.18924	4.09474	0.264068	0.189254	1.25829
gen_6987	ACTCTCTATTACATTCCATTCTCCATTCCATTCCCATACATTCTCCACTCCACTGCATTCTCTATTCCATTCTCCATTCCATTCCACTCCTTTCCGCATTCCTTTCCATTCTCCATTGCATTCCATTCTCCATTGCATTCCATTCTCCATTTTTTACACATTCCATTCCATTCTCCCGTCCATTTTTCACTCCATTCCAT	003	regLM	58	-0.991252	-0.290034	3.61183	0.0167439	-0.290113	0.727693
gen_5509	AGAAAAATGTTTTATTCTTGATCTTTGGAGCAAGCATAACCACCATCACTTCAAGTACACTGGCCACGACCCAACAGTTACTCCACGTCTCTGACTAAGCCTTCAGGATTCTTAGAACAAAAACCACAGAAACTTGGGCATTTTCCTAAATATGTCTTAGGTTTTGAGCCATTGCCAGACATGTTAAATTATTCAAGAAA	003	regLM	99	-0.119759	0.134414	4.0321	0.636777	0.13432	1.70784
gen_5435	ACTCTCTATTACATTCCATTCTCCATTCCATTCCCATACATTCTCCACTCCACTGCATTCTCTATTCCATTCTCCATTCCATTCCACTCCTTTCCGCATTCCTTTCCATTCTCCATTGCATTCCATTCTCCATTGCATTCCATTCTCCATTGCATTCCATTCTCCATTCCATTCTCCCGTCCATTTTTCACTCCATTCCA	003	regLM	56	-0.927575	-0.236064	3.65585	0.0397261	-0.236057	0.933493
gen_7167	ACTCTCTATTACATTCCATTCTCCATTCCATTCCCATACATTCTCCACTCCACTGCATTCTCTATTCCATTCTCCATTCCATTCCACTCCTTTCCGCATTCCTTTCCATTCTCCATTGCATTCCATTCTCCATTGCATTCCATTCTCCATTGCATTCCATTCTCCATTCCATTCCATTCTCCCATTGTTTCATTCCATGT	003	regLM	60	-0.897232	-0.288993	3.60284	0.00974215	-0.288932	0.973382
gen_6497	ACTCTCTATTACATTCCATTCTCCATTCCATTCCCATACATTCTCCACTCCACTGCATTCTCTATTCCATTCTCCATTCCATTCCACTCCTTTCCGCATTCCTTTCCATTCTCCATTGCATTCCATTCTCCATTGCATTCCATTCTCCATTGCATTCCATTCTCCATTGCATTCCATTCTCCCGTCCATTTTTCACTCCA	003	regLM	60	-0.900686	-0.210971	3.67939	0.129624	-0.210971	1.51336
gen_8117	AGAAAAATGTTTTATTCTTGATCTTTGGAGCAAGCATAACCACCATCACTTCAAGTACACTGGCCACGACCCAACAGTTACTCCACGTCTCTGACTAAGCCTTCAGGATTCTTAGAACAAAAACCACAGAAACTTGGGCATTTTCCTAAATATGTCTTAGGTTTTGAGCCATTGCCAGACATGTTAAAATATTGTAGGAG	003	regLM	100	-0.179664	0.0706734	3.9558	0.618427	0.0706541	1.45845
gen_8199	ACTCTCTATTACATTCCATTCTCCATTCCATTCCCATACATTCTCCACTCCACTGCATTCTCTATTCCATTCTCCATTCCATTCCACTCCTTTCCGCATTCCTTTCCATTCTCCATTGCATTCCATTCTCCATTGCATTCCATTCTCCATTGCATTCCATTCTCCATTCCATTCCATTCTCCCTTCCATATTTTATTCAG	003	regLM	60	-1.0371	-0.278175	3.60605	-0.110909	-0.278139	0.502261
gen_9710	ACTCTCTATTACATTCCATTCTCCATTCCATTCCCATACATTCTCCACTCCACTGCATTCTCTATTCCATTCTCCATTCCATTCCACTCCTTTCCGCATTCCTTTCCATTCTCCATTGCATTCCATTCTCCATTGCATTCCATTCTCCATTGCATTCCATTCTCCATTCCATTCCATTCTCCCCCTTTTCAATTCATTTA	003	regLM	60	-0.848656	-0.276527	3.60552	-0.0664127	-0.276469	0.552506
gen_9003	ACTCTCTATTACATTCCATTCTCCATTCCATTCCCATACATTCTCCACTCCACTGCATTCTCTATTCCATTCTCCATTCCATTCCACTCCTTTCCGCATTCCTTTCCATTCTCCATTGCATTCCATTCTCCATTGCATTCCATTCTCCATTGCATTCCATTCTCCATTGCATTCCATTCTCCCGTCCATTTTTCACTCCC	003	regLM	61	-0.881738	-0.195776	3.68531	0.158946	-0.195726	1.51187
gen_9484	AGAAAAATGTTTTATTCTTGATCTTTGGAGCAAGCATAACCACCATCACTTCAAGTACACTGGCCACGACCCAACAGTTACTCCACGTCTCTGACTAAGCCTTCAGGATTCTTAGAACAAAAACCACAGAAACTTGGGCATTTTCCTAAATATGTCTTAGGTTTTGAGCCATTGCCAGACATGTTAAATTATTAATCCCT	003	regLM	97	0.0119144	0.0399247	3.92062	0.696336	0.0397998	1.41087
gen_5240	ACTCTCTATTACATTCCATTCTCCATTCCATTCCCATACATTCTCCACTCCACTGCATTCTCTATTCCATTCTCCATTCCATTCCACTCCTTTCCGCATTCCTTTCCATTCTCCATTGCATTCCATTCTCCATTGCATTCCATTCTCCATTGCATTCCATTCTCCATTCCATTCCATTCTCCCTTTCATTTCATTCCATT	003	regLM	58	-0.939909	-0.292443	3.58714	-0.0334259	-0.292464	0.65117
gen_9552	AGAAAAATGTTTTATTCTTGATCTTTGGAGCAAGCATAACCACCATCACTTCAAGTACACTGGCCACGACCCAACAGTTACTCCACGTCTCTGACTAAGCCTTCAGGATTCTTAGAACAAAAACCACAGAAACTTGGGCATTTTCCTAAATATGTCTTAGGTTTTGAGCCATTGCCAGACATGTTAAAAGGGTCCACAGA	003	regLM	100	-0.243206	0.178451	4.05795	0.470145	0.178526	1.26822
gen_6104	AGAAAAATGTTTTATTCTTGATCTTTGGAGCAAGCATAACCACCATCACTTCAAGTACACTGGCCACGACCCAACAGTTACTCCACGTCTCTGACTAAGCCTTCAGGATTCTTAGAACAAAAACCACAGAAACTTGGGCATTTTCCTAAATATGTCTTAGGTTTTGAGCCATTGCCAGACATGTTAAAAGTCTTGATTTC	003	regLM	98	-0.197157	0.027242	3.90525	0.583737	0.0272123	1.4657
gen_6582	ACTCTCTATTACATTCCATTCTCCATTCCATTCCCATACATTCTCCACTCCACTGCATTCTCTATTCCATTCTCCATTCCATTCCACTCCTTTCCGCATTCCTTTCCATTCTCCATTGCATTCCATTCTCCATTGCATTCCATTCTCCATTGCATTCCATTCTCCATTGCATTCCATTCTCTGTTCCATTCCATTCCATT	003	regLM	58	-0.909344	-0.28023	3.59744	0.0261038	-0.280238	0.894413
gen_8076	ACTCTCTATTACATTCCATTCTCCATTCCATTCCCATACATTCTCCACTCCACTGCATTCTCTATTCCATTCTCCATTCCATTCCACTCCTTTCCGCATTCCTTTCCATTCTCCATTGCATTCCATTCTCCATTGCATTCCATTCTCCATTGCATTCCATTCTCCATTTTTTACACCCCATTCTCCATTACATTCCATGT	003	regLM	57	-0.969949	-0.255412	3.62128	-0.0880165	-0.255428	0.501515
gen_7233	AGAAAAATGTTTTATTCTTGATCTTTGGAGCAAGCATAACCACCATCACTTCAAGTACACTGGCCACGACCCAACAGTTACTCCACGTCTCTGACTAAGCCTTCAGGATTCTTAGAACAAAAACCACAGAAACTTGGGCATTTTCCTAAATATGTCTTAGGTTTTGAGCCATTGCCAGACATGTTAAATTATTTATTTAA	003	regLM	97	-0.0583455	0.0943559	3.97094	0.719755	0.0943919	1.48722
gen_8493	AGAAAAATGTTTTATTCTTGATCTTTGGAGCAAGCATAACCACCATCACTTCAAGTACACTGGCCACGACCCAACAGTTACTCCACGTCTCTGACTAAGCCTTCAGGATTCTTAGAACAAAAACCACAGAAACTTGGGCATTTTCCTAAATATGTCTTAGGTTTTGAGCCATTGCCAGACATGTTAAAATATTGTAAATT	003	regLM	98	-0.199693	-0.00801693	3.8683	0.583452	-0.007986	1.33494
gen_12933	TGTTATCTGTTTTTTACCACAATAAAAAAAGTAAAATGAAAAAAAGAGCAATGTACATTCATTCACAGAGACAGAAAGTAGGACAGAGGTTACCAGGGGTTGGGGAAGGGGAAAGAGGCAGTTAATATTTAACAAGCACAGAGTTTTTTTTTAACCTCATTGATGTTCAGCAAAATCACTGTGATCAAAGTTCAGAGTTG	300	regLM	94	6.11479	-0.092906	0.105461	4.89417	-0.092928	0.740421
gen_11212	TGTTATCTGTTTTTTACCACAATAAAAAAAGTAAAATGAAAAAAAGAGCAATGTACATTCATTCACAGAGACAGAAAGTAGGACAGAGGTTACCAGGGGTTGGGGAAGGGGAAAGAGGCAGTTAATATTTAACAAGCACAGAGTTTTTTTTTAACCTCATTGATGTTCAGCAAAATCACTGTGATCAAAGTTCAGAGTTT	300	regLM	93	6.12122	-0.0976112	0.121663	4.884	-0.0976177	0.759503
gen_14203	TGTTATCTGTTTTTTACCACAATAAAAAAAGTAAAATGAAAAAAAGAGCAATGTACATTCATTCACAGAGACAGAAAGTAGGACAGAGGTTACCAGGGGTTGGGGAAGGGGAAAGAGGCAGTTAATATTTAACAAGCACAGAGTTTTTTTTTAACCTCATTGATGTTCAGCAAAATCACTGTGATCAAAGTTCAAAGCAG	300	regLM	93	6.08851	-0.135658	0.126285	4.90422	-0.135695	0.717564
gen_13942	TGTTATCTGTTTTTTACCACAATAAAAAAAGTAAAATGAAAAAAAGAGCAATGTACATTCATTCACAGAGACAGAAAGTAGGACAGAGGTTACCAGGGGTTGGGGAAGGGGAAAGAGGCAGTTAATATTTAACAAGCACAGAGTTTTTTTTTAACCTCATTGATGTTCAGCAAAATCACTGTGATCAAAGTTCAGAAAAC	300	regLM	95	6.06265	-0.138068	0.105384	4.79241	-0.138044	0.739798
gen_10427	TGTTATCTGTTTTTTACCACAATAAAAAAAGTAAAATGAAAAAAAGAGCAATGTACATTCATTCACAGAGACAGAAAGTAGGACAGAGGTTACCAGGGGTTGGGGAAGGGGAAAGAGGCAGTTAATATTTAACAAGCACAGAGTTTTTTTTTAACCTCATTGATGTTCAGCAAAATCACTGTGATCAAAGTTCAGAAAAA	300	regLM	96	6.03391	-0.141978	0.115469	4.74277	-0.141952	0.710866
gen_10882	TGTTATCTGTTTTTTACCACAATAAAAAAAGTAAAATGAAAAAAAGAGCAATGTACATTCATTCACAGAGACAGAAAGTAGGACAGAGGTTACCAGGGGTTGGGGAAGGGGAAAGAGGCAGTTAATATTTAACAAGCACAGAGTTTTTTTTTAACCTCATTGATGTTCAGCAAAATCACTGTGATCAAAGTTCAGAAAAT	300	regLM	95	6.0213	-0.141033	0.126783	4.7392	-0.141013	0.721987
gen_14528	CTTCCTCCCTGGGATGAGTGAGGCAAGAAGGAGAATATGAGCTGTGGACTACGAGAAAAAAAACCAGAGTGACTGAAGGAGAAGGAACTCCTGGTCCTTCCTGGTGACCCAGAGCCAACAGAGAAATGGGTAACTCATTAACCAGAGAACAGTTGCCTGGTGGACTTTGTTCCAGAGACCATAACTCAGGTTTAAAGGCC	300	regLM	34	5.88241	-0.0342526	0.0675521	5.42391	-0.034251	0.746341
gen_14578	CTTCCTCCCTGGGATGAGTGAGGCAAGAAGGAGAATATGAGCTGTGGACTACGAGAAAAAAAACCAGAGTGACTGAAGGAGAAGGAACTCCTGGTCCTTCCTGGTGACCCAGAGCCAACAGAGAAATGGGTAACTCATTAACCAGAGAACAGTTGCCAGAGTCCCGAAGACAGACAGCCTATTTAAGGACTTTGGAAGGT	300	regLM	31	5.8434	0.00390861	0.0724998	5.3953	0.00389299	0.636981
gen_13202	CTTCCTCCCTGGGATGAGTGAGGCAAGAAGGAGAATATGAGCTGTGGACTACGAGAAAAAAAACCAGAGTGACTGAAGGAGAAGGAACTCCTGGTCCTTCCTGGTGACCCAGAGCCAACAGAGAAATGGGTAACTCATTAACCAGAGAACAGTTGCCAGAGTCCCGAAGACAGACAGCCTATTTAAGGACTTTGGAAGTT	300	regLM	31	5.84284	0.00610537	0.083225	5.35202	0.00610335	0.644194
gen_12469	TGTTATCTGTTTTTTACCACAATAAAAAAAGTAAAATGAAAAAAAGAGCAATGTACATTCATTCACAGAGACAGAAAGTAGGACAGAGGTTACCAGGGGTTGGGGAAGGGGAAAGAGGCAGTTAATATTTAACAAGCACAGAGTTTTTTTTTAACCTGATAATAGTTAAGCCATGGTGAAAAAATTTCTGACAAAGGGCA	300	regLM	97	5.91656	0.19955	0.178946	4.52092	0.19952	0.69718
gen_14224	TGTTATCTGTTTTTTACCACAATAAAAAAAGTAAAATGAAAAAAAGAGCAATGTACATTCATTCACAGAGACAGAAAGTAGGACAGAGGTTACCAGGGGTTGGGGAAGGGGAAAGAGGCAGTTAATATTTAACAAGCACAGAGTTTTTTTTTAACCTGATAATAGTTAAGCCATGGTGAAAGATGGTGATCTTTGCTATG	300	regLM	97	5.87957	0.173959	0.135131	4.64143	0.173914	0.527113
gen_12754	CTTCCTCCCTGGGATGAGTGAGGCAAGAAGGAGAATATGAGCTGTGGACTACGAGAAAAAAAACCAGAGTGACTGAAGGAGAAGGAACTCCTGGTCCTTCCTGGTGACCCAGAGCCAACAGAGAAATGGGTAACTCATTAACCAGAGAACAGTTGCCAGAGTCCCGAAGACAGACAGCCTATTTAAGGACTTTGGAAGGC	300	regLM	31	5.78749	0.0247532	0.0940062	5.33552	0.02473	0.681166
gen_13249	TGTTATCTGTTTTTTACCACAATAAAAAAAGTAAAATGAAAAAAAGAGCAATGTACATTCATTCACAGAGACAGAAAGTAGGACAGAGGTTACCAGGGGTTGGGGAAGGGGAAAGAGGCAGTTAATATTTAACAAGCACAGAGTTTTTTTTTAACCTGATAATAGTTAAGCCATGGTGAAATGTTCTCAAATAATCAAAT	300	regLM	98	5.85491	0.162882	0.0432568	4.51363	0.162833	0.562735
gen_13893	TGTTATCTGTTTTTTACCACAATAAAAAAAGTAAAATGAAAAAAAGAGCAATGTACATTCATTCACAGAGACAGAAAGTAGGACAGAGGTTACCAGGGGTTGGGGAAGGGGAAAGAGGCAGTTAATATTTAACAAGCACAGAGTTTTTTTTTAACCTGATAATAGTTAAGCCATGGTGAAATGTTCTCAAATAATCATGA	300	regLM	97	5.88289	0.192193	0.026009	4.55782	0.19216	0.572243
gen_12609	TGTTATCTGTTTTTTACCACAATAAAAAAAGTAAAATGAAAAAAAGAGCAATGTACATTCATTCACAGAGACAGAAAGTAGGACAGAGGTTACCAGGGGTTGGGGAAGGGGAAAGAGGCAGTTAATATTTAACAAGCACAGAGTTTTTTTTTAACCTGATAATAGTTAAGCCATGGTGAAAAAATCTCTGACTTCAATGC	300	regLM	97	5.86553	-0.104179	0.192424	4.5681	-0.104215	0.63548
gen_11848	TGTTATCTGTTTTTTACCACAATAAAAAAAGTAAAATGAAAAAAAGAGCAATGTACATTCATTCACAGAGACAGAAAGTAGGACAGAGGTTACCAGGGGTTGGGGAAGGGGAAAGAGGCAGTTAATATTTAACAAGCACAGAGTTTTTTTTTAACCTGATAATAGTTAAGCCATGGTGAAAAAATCTCTGACTTCAATGT	300	regLM	97	5.86523	-0.101169	0.199462	4.55594	-0.10117	0.616819
gen_10527	CTTCCTCCCTGGGATGAGTGAGGCAAGAAGGAGAATATGAGCTGTGGACTACGAGAAAAAAAACCAGAGTGACTGAAGGAGAAGGAACTCCTGGTCCTTCCTGGTGACCCAGAGCCAACAGAGAAATGGGTAACTCATTAACCAGAGAACAGTTGCCAGAGTCCCGAAGACAGACAGCCTTCTGACCTCCTGATCTCTGG	300	regLM	36	5.80892	0.0633928	0.176678	5.43528	0.0634012	0.436458
gen_14718	TGTTATCTGTTTTTTACCACAATAAAAAAAGTAAAATGAAAAAAAGAGCAATGTACATTCATTCACAGAGACAGAAAGTAGGACAGAGGTTACCAGGGGTTGGGGAAGGGGAAAGAGGCAGTTAATATTTAACAAGCACAGAGTTTTTTTTTAACCTGATAATAGTTAAGCCATGGTGAAAGATGGTGATCTTTGCTATA	300	regLM	97	5.78746	0.126415	0.1603	4.5547	0.126406	0.496778
gen_13007	CTTCCTCCCTGGGATGAGTGAGGCAAGAAGGAGAATATGAGCTGTGGACTACGAGAAAAAAAACCAGAGTGACTGAAGGAGAAGGAACTCCTGGTCCTTCCTGGTGACCCAGAGCCAACAGAGAAATGGGTAACTCATTAACCAGAGAACAGTTGCCAGAGTCCCGAAGACAGACAGCCTTCTGACCTCCTAATGACACA	300	regLM	34	5.6928	0.0887301	0.0838067	5.48199	0.088759	0.456056
gen_13511	CTTCCTCCCTGGGATGAGTGAGGCAAGAAGGAGAATATGAGCTGTGGACTACGAGAAAAAAAACCAGAGTGACTGAAGGAGAAGGAACTCCTGGTCCTTCCTGGTGACCCAGAGCCAACAGAGAAATGGGTAACTCATTAACCAGAGAACAGTTGCCAGAGTCAGGAATTTCCCAAATGTGACAGTTCACCAACAGCATA	300	regLM	33	5.76252	0.163436	0.0584004	5.49928	0.163459	0.393249
gen_12683	TGTTATCTGTTTTTTACCACAATAAAAAAAGTAAAATGAAAAAAAGAGCAATGTACATTCATTCACAGAGACAGAAAGTAGGACAGAGGTTACCAGGGGTTGGGGAAGGGGAAAGAGGCAGTTAATATTTAACAAGCACAGAGTTTTTTTTTAACCTGATAATAGTTAAGCCATGGTGAAACATTGTCTTATGGATGATG	300	regLM	97	5.73476	0.139969	0.0820128	4.75241	0.139698	0.497735
gen_10816	CTTCCTCCCTGGGATGAGTGAGGCAAGAAGGAGAATATGAGCTGTGGACTACGAGAAAAAAAACCAGAGTGACTGAAGGAGAAGGAACTCCTGGTCCTTCCTGGTGACCCAGAGCCAACAGAGAAATGGGTAACTCATTAACCAGAGAACAGTTGCCAGAGTCCCGAAGACAGACAGCCTTCTGACCTCCTGATCTAAGG	300	regLM	36	5.75716	0.0642581	0.163198	5.45753	0.0642716	0.466633
gen_11880	CTTCCTCCCTGGGATGAGTGAGGCAAGAAGGAGAATATGAGCTGTGGACTACGAGAAAAAAAACCAGAGTGACTGAAGGAGAAGGAACTCCTGGTCCTTCCTGGTGACCCAGAGCCAACAGAGAAATGGGTAACTCATTAACCAGAGAACAGTTGCCAGAGTCAGGAATTTCCCAAATGTGACAGTTCACCAACAGCACA	300	regLM	34	5.78777	0.19521	0.0220661	5.47824	0.195211	0.384737
gen_12117	TTCTGGACTTTAATCAGTTTCTCTGTCTTTCTCAATCTAAGTGCTTACCGGGTAACTGGAGGCCACTTGGTTGCTGGTTTTGGCTGGGCCTTTCTGGACTTTACCCCTCAGCCCCTGTTTATCCATCCCTGTTTACTCTTACTGTTCAACCACCATTCTTTGAACTGCTCACCATCATCCTTTGACCTGCCCTGTGAGTT	300	regLM	28	5.26358	-0.324138	-0.824337	4.08029	-0.324123	-0.120427
gen_13537	CTTCCTCCCTGGGATGAGTGAGGCAAGAAGGAGAATATGAGCTGTGGACTACGAGAAAAAAAACCAGAGTGACTGAAGGAGAAGGAACTCCTGGTCCTTCCTGGTGACCCAGAGCCAACAGAGAAATGGGTAACTCATTAACCAGAGAACAGTTGCCAGAGTCCCGAAGACAGACAGCCTTCTGACCTCCTGATCTAGAA	300	regLM	35	5.72101	0.0388042	0.134727	5.38529	0.0387949	0.447137
gen_14136	CTTCCTCCCTGGGATGAGTGAGGCAAGAAGGAGAATATGAGCTGTGGACTACGAGAAAAAAAACCAGAGTGACTGAAGGAGAAGGAACTCCTGGTCCTTCCTGGTGACCCAGAGCCAACAGAGAAATGGGTAACTCATTAACCAGAGAACAGTTGCCAGAGTCCCGAAGACAGACAGCCTTCTGACCTCCTGATCTAGGA	300	regLM	35	5.7489	0.04606	0.163284	5.42999	0.0460558	0.443575
gen_14038	CTTCCTCCCTGGGATGAGTGAGGCAAGAAGGAGAATATGAGCTGTGGACTACGAGAAAAAAAACCAGAGTGACTGAAGGAGAAGGAACTCCTGGTCCTTCCTGGTGACCCAGAGCCAACAGAGAAATGGGTAACTCATTAACCAGAGAACAGTTGCCAGAGTCCCGAAGACAGACAGCCTTCTGACCTCCTAATGACACC	300	regLM	34	5.62653	0.0294238	0.0509782	5.40022	0.0294234	0.329698
gen_11577	CTTCCTCCCTGGGATGAGTGAGGCAAGAAGGAGAATATGAGCTGTGGACTACGAGAAAAAAAACCAGAGTGACTGAAGGAGAAGGAACTCCTGGTCCTTCCTGGTGACCCAGAGCCAACAGAGAAATGGGTAACTCATTAACCAGAGAACAGTTGCCAGAGTCCCGAAGACAGACAGCCTATTTAAGGACTTTGGAGGTT	300	regLM	32	5.66806	0.0191402	0.110362	5.27668	0.0191323	0.606013
gen_14679	CTTCCTCCCTGGGATGAGTGAGGCAAGAAGGAGAATATGAGCTGTGGACTACGAGAAAAAAAACCAGAGTGACTGAAGGAGAAGGAACTCCTGGTCCTTCCTGGTGACCCAGAGCCAACAGAGAAATGGGTAACTCATTAACCAGAGAACAGTTGCCAGAGTCCCGAAGACAGACAGCCTTCTGACAGAGGACAAATAGA	300	regLM	31	5.73678	0.0575697	0.18138	5.35	0.0575686	0.520604
gen_11909	TTCTGGACTTTAATCAGTTTCTCTGTCTTTCTCAATCTAAGTGCTTACCGGGTAACTGGAGGCCACTTGGTTGCTGGTTTTGGCTGGGCCTTTCTGGACTTTACCCCTCAGCCCCTGTTTATCCATCCCTGTTTACTCTTACTGTTCAACCACCATTCTTTGAACTGCTCACCATCATCCTTTGACCTGCCCTGTGAGTA	300	regLM	29	5.31495	-0.237344	-0.70797	4.15775	-0.237357	-0.0572711
gen_14248	CTTCCTCCCTGGGATGAGTGAGGCAAGAAGGAGAATATGAGCTGTGGACTACGAGAAAAAAAACCAGAGTGACTGAAGGAGAAGGAACTCCTGGTCCTTCCTGGTGACCCAGAGCCAACAGAGAAATGGGTAACTCATTAACCAGAGAACAGTTGCCAGAGTCAGGAATTTCCCAAATGTGACAACTGGTGGTACTATTC	300	regLM	36	5.53569	-0.0361396	0.0123006	5.31893	-0.0361535	0.25966
gen_14952	CTTCCTCCCTGGGATGAGTGAGGCAAGAAGGAGAATATGAGCTGTGGACTACGAGAAAAAAAACCAGAGTGACTGAAGGAGAAGGAACTCCTGGTCCTTCCTGGTGACCCAGAGCCAACAGAGAAATGGGTAACTCATTAACCAGAGAACAGTTGCCAGAGTCCCCAAGTGGTTGAGTAATTTTGAGCTTCAGAGTTCAT	300	regLM	31	5.59001	0.0696566	-0.552097	5.42036	0.0696423	0.306729
gen_14238	CTTCCTCCCTGGGATGAGTGAGGCAAGAAGGAGAATATGAGCTGTGGACTACGAGAAAAAAAACCAGAGTGACTGAAGGAGAAGGAACTCCTGGTCCTTCCTGGTGACCCAGAGCCAACAGAGAAATGGGTAACTCATTAACCAGAGAACAGTTGCCAGAGTCAGGAATTTCCCAAATGTGACAGTTGATTTGTATGAAA	300	regLM	33	5.65587	0.140229	-0.00582393	5.48424	0.140262	0.182929
gen_10553	CTTCCTCCCTGGGATGAGTGAGGCAAGAAGGAGAATATGAGCTGTGGACTACGAGAAAAAAAACCAGAGTGACTGAAGGAGAAGGAACTCCTGGTCCTTCCTGGTGACCCAGAGCCAACAGAGAAATGGGTAACTCATTAACCAGAGAACAGTTGCCAGAGTCAGGAATTTCCCAAATGTGACAGTTGATTTGTATGAAG	300	regLM	33	5.66151	0.157014	-0.00467233	5.50023	0.157039	0.206906
gen_14366	CTTCCTCCCTGGGATGAGTGAGGCAAGAAGGAGAATATGAGCTGTGGACTACGAGAAAAAAAACCAGAGTGACTGAAGGAGAAGGAACTCCTGGTCCTTCCTGGTGACCCAGAGCCAACAGAGAAATGGGTAACTCATTAACCAGAGAACAGTTGCCAGAGTCCCGAAGACAGACAGCCTTCTGATGAATGACCTCAGCT	300	regLM	33	5.65901	0.156951	0.151439	5.5169	0.156943	0.674765
gen_14968	TGTTATCTGTTTTTTACCACAATAAAAAAAGTAAAATGAAAAAAAGAGCAATGTACATTCATTCACAGAGACAGAAAGTAGGACAGAGGTTACCAGGGGTTGGGGAAGGGGAAAGAGGCAGTTAATATTTAACAAGCACAGAGTTTTTTTTTAACCTGATAATAGTTAAGCCATGGTGAAAAAATTTCTGAAAAAAGTGG	300	regLM	97	5.68732	0.188572	0.197733	4.1628	0.188577	0.539906
gen_13042	CTTCCTCCCTGGGATGAGTGAGGCAAGAAGGAGAATATGAGCTGTGGACTACGAGAAAAAAAACCAGAGTGACTGAAGGAGAAGGAACTCCTGGTCCTTCCTGGTGACCCAGAGCCAACAGAGAAATGGGTAACTCATTAACCAGAGAACAGTTGCCAGAGTCCCGAAGTCAGATGTGAGGGTGAACTGGAGTTTGGAAC	300	regLM	35	5.45802	-0.0931896	-0.0290996	5.28989	-0.0932133	0.33865
gen_14521	CTTCCTCCCTGGGATGAGTGAGGCAAGAAGGAGAATATGAGCTGTGGACTACGAGAAAAAAAACCAGAGTGACTGAAGGAGAAGGAACTCCTGGTCCTTCCTGGTGACCCAGAGCCAACAGAGAAATGGGTAACTCATTAACCAGAGAACAGTTGCCAGAGTCAGGAATTTCCCAAATGTGGCAGGGAATTCGGGCTCTC	300	regLM	37	5.68068	-0.00320904	0.19608	5.22254	-0.00319337	0.627976
gen_13576	CTTCCTCCCTGGGATGAGTGAGGCAAGAAGGAGAATATGAGCTGTGGACTACGAGAAAAAAAACCAGAGTGACTGAAGGAGAAGGAACTCCTGGTCCTTCCTGGTGACCCAGAGCCAACAGAGAAATGGGTAACTCATTAACCAGAGAACAGTTGCCAGAGTCAGGAATTTCCCAAATGTGGCAGGGAATTCGGGCTCCA	300	regLM	36	5.67308	-0.00596043	0.188891	5.20416	-0.00593898	0.616181
gen_10564	TGTTATCTGTTTTTTACCACAATAAAAAAAGTAAAATGAAAAAAAGAGCAATGTACATTCATTCACAGAGACAGAAAGTAGGACAGAGGTTACCAGGGGTTGGGGAAGGGGAAAGAGGCAGTTAATATTTAACAAGCACAGAGTTTTTTTTTAACCTGATAATAGTTAAGCCATGGTGAAATACTGTCTTAAATGGTTAT	300	regLM	96	5.66206	0.189523	0.0417889	4.46374	0.189538	0.594471
gen_11569	TGTTATCTGTTTTTTACCACAATAAAAAAAGTAAAATGAAAAAAAGAGCAATGTACATTCATTCACAGAGACAGAAAGTAGGACAGAGGTTACCAGGGGTTGGGGAAGGGGAAAGAGGCAGTTAATATTTAACAAGCACAGAGTTTTTTTTTAACCTGATAATAGTTAAGCCATGGTGAAAAAATTTCTGAAAAAAGTAC	300	regLM	96	5.66192	0.182039	0.193317	4.11242	0.182001	0.539826
gen_12704	TGTTATCTGTTTTTTACCACAATAAAAAAAGTAAAATGAAAAAAAGAGCAATGTACATTCATTCACAGAGACAGAAAGTAGGACAGAGGTTACCAGGGGTTGGGGAAGGGGAAAGAGGCAGTTAATATTTAACAAGCACAGAGTTTTTTTTTAACCTGATAATAGTTAAGCCATGGTGAAATGGACTCCACTATAATAGT	300	regLM	96	5.6466	0.0821043	0.186309	4.58663	0.0821533	0.533616
gen_11435	TGTTATCTGTTTTTTACCACAATAAAAAAAGTAAAATGAAAAAAAGAGCAATGTACATTCATTCACAGAGACAGAAAGTAGGACAGAGGTTACCAGGGGTTGGGGAAGGGGAAAGAGGCAGTTAATATTTAACAAGCACAGAGTTTTTTTTTAACCTGATAATAGTTAAGCCATGGTGAAAGGTGATGATCACAATACTG	300	regLM	96	5.59168	0.171983	0.00399456	4.56736	0.171935	0.302261
gen_12104	CTTCCTCCCTGGGATGAGTGAGGCAAGAAGGAGAATATGAGCTGTGGACTACGAGAAAAAAAACCAGAGTGACTGAAGGAGAAGGAACTCCTGGTCCTTCCTGGTGACCCAGAGCCAACAGAGAAATGGGTAACTCATTAACCAGAGAACAGTTGCCAGAGTCCCCAAGTGGTTGAGTAATTTTGAGCTTCAGAGTACAG	300	regLM	32	5.5423	0.133679	-0.485223	5.36125	0.133696	0.344548
gen_11910	TGTTATCTGTTTTTTACCACAATAAAAAAAGTAAAATGAAAAAAAGAGCAATGTACATTCATTCACAGAGACAGAAAGTAGGACAGAGGTTACCAGGGGTTGGGGAAGGGGAAAGAGGCAGTTAATATTTAACAAGCACAGAGTTTTTTTTTAACCTGATAATAGTTAAGCCATGGTGAAAGGTGATGATCACAATATTG	300	regLM	96	5.53454	0.139529	0.0397364	4.46478	0.139508	0.327988
gen_14739	CTTCCTCCCTGGGATGAGTGAGGCAAGAAGGAGAATATGAGCTGTGGACTACGAGAAAAAAAACCAGAGTGACTGAAGGAGAAGGAACTCCTGGTCCTTCCTGGTGACCCAGAGCCAACAGAGAAATGGGTAACTCATTAACCAGAGAACAGTTGCCAGAGTCCCGAAGTCAGATGTGAGGGTGAACTGGAGTTTAGAAC	300	regLM	35	5.34995	-0.0739863	0.0146342	5.29656	-0.0739938	0.293808
gen_11241	TTCTGGACTTTAATCAGTTTCTCTGTCTTTCTCAATCTAAGTGCTTACCGGGTAACTGGAGGCCACTTGGTTGCTGGTTTTGGCTGGGCCTTTCTGGACTTTACCCCTCAGCCCCTGTTTATCCATCCCTGTTTACTCTTACTGTTCAACCACCATTCTTTGAACTGCTCAGCGTCCAGCACACTGGACTGTCTGGTTCA	300	regLM	29	5.26782	-0.0471376	-0.411422	4.59817	-0.0471466	0.339492
gen_13058	CTTCCTCCCTGGGATGAGTGAGGCAAGAAGGAGAATATGAGCTGTGGACTACGAGAAAAAAAACCAGAGTGACTGAAGGAGAAGGAACTCCTGGTCCTTCCTGGTGACCCAGAGCCAACAGAGAAATGGGTAACTCATTAACCAGAGAACAGTTGCCAGAGTCAGGAATTTTCCAGGTGTACTTAATAAATGCAAGTATA	300	regLM	34	5.41683	-0.109028	0.143996	5.35928	-0.109172	0.0659669
gen_13539	CTTCCTCCCTGGGATGAGTGAGGCAAGAAGGAGAATATGAGCTGTGGACTACGAGAAAAAAAACCAGAGTGACTGAAGGAGAAGGAACTCCTGGTCCTTCCTGGTGACCCAGAGCCAACAGAGAAATGGGTAACTCATTAACCAGAGAACAGTTGCCAGAGTCCCGAAGTCAGATGTGAGGGTAGAGTGGGGCAGAATTC	300	regLM	35	5.27636	-0.140238	0.0856615	5.24369	-0.140221	0.368034
gen_12123	ACCACAGATCAAGAATCAGGGTAAGAAAGGGGAGATGGATGCTGTTTCCTAGCTTTTTCACCACCCGCTTTGTGACATCAGGCAAGTCGCCAGTCTGTGTGTGTGTGCCCCAGCTGTGAGCCACCTGACCCCTCAGGATTTCAGAAGTCTGTAAAGAACTTTGATCTCAGCAGTAAGCAAACACAAGTTATTGCATAAAT	300	regLM	97	5.22801	0.13583	-0.063713	4.60663	0.135809	0.236442
gen_10257	ACCACAGATCAAGAATCAGGGTAAGAAAGGGGAGATGGATGCTGTTTCCTAGCTTTTTCACCACCCGCTTTGTGACATCAGGCAAGTCGCCAGTCTGTGTGTGTGTGCCCCAGCTGTGAGCCACCTGACCCCTCAGGATTTCAGAAGTCTGTAAAGAACTTTGATCTCAGCAGTAAGCAAACACAAGTTATTGCATAAAG	300	regLM	97	5.23399	0.144354	-0.00901205	4.60995	0.14437	0.19961
gen_13237	TTCTGGACTTTAATCAGTTTCTCTGTCTTTCTCAATCTAAGTGCTTACCGGGTAACTGGAGGCCACTTGGTTGCTGGTTTTGGCTGGGCCTTTCTGGACTTTACCCCTCAGCCCCTGTTTATCCATCCCTGTTTACTCTTACTGTTCAACCACCATTCTTTGAGCTGCTCAGACCCTTCCCTGGGAAAATCTCCCTGCCA	300	regLM	28	4.85713	-0.220173	-0.153217	3.58316	-0.220197	0.256263
gen_11368	TTCTGGACTTTAATCAGTTTCTCTGTCTTTCTCAATCTAAGTGCTTACCGGGTAACTGGAGGCCACTTGGTTGCTGGTTTTGGCTGGGCCTTTCTGGACTTTACCCCTCAGCCCCTGTTTATCCATCCCTGTTTACTCTTACTGTTCAACCACCATTCTTTGAGCTGCTCAGACCCTTCCCTGGGAAAATCTCCCTGCCC	300	regLM	28	4.88849	-0.184757	-0.106372	3.57434	-0.184744	0.26608
gen_12523	CCAAGACCTCAAACTGTGTTCTCTACTAAAAGGAATCAAGGTTCCCTAGAGAAATGGCTGACTCCATGTATGGTGCAGTATATTGATCCTGGAACATCTTTTTTGCCAGAAAGCAAGGAAGCCATCAAAGTCCAACAGGATCACGTCAAAAAGACATGAAAGTCAACTTGAAGAGATAATTATTAACCTAGATGAGACCA	300	regLM	98	5.13808	0.152989	0.108484	3.38844	0.152963	0.253961
gen_10583	CCAAGACCTCAAACTGTGTTCTCTACTAAAAGGAATCAAGGTTCCCTAGAGAAATGGCTGACTCCATGTATGGTGCAGTATATTGATCCTGGAACATCTTTTTTGCCAGAAAGCAAGGAAGCCATCAAAGTCCAACAGGATCACGTCAAAAAGACATGAAAGTCAACTTGAAGAGATAATTATTAACCTAGATGAGACAA	300	regLM	98	5.1256	0.172294	0.141439	3.47803	0.172338	0.292555
gen_10729	ACCACAGATCAAGAATCAGGGTAAGAAAGGGGAGATGGATGCTGTTTCCTAGCTTTTTCACCACCCGCTTTGTGACATCAGGCAAGTCGCCAGTCTGTGTGTGTGTGCCCCAGCTGTGAGCCACCTGACCCCTCAGGATTTCAGAAGTCTGTAAAGAACTTTGATCTCAGCAGTAAGCAAACACAAGTTATTGCACATCA	300	regLM	97	5.10499	0.180153	0.0268588	4.39374	0.180153	0.217972
gen_14577	TTCTGGACTTTAATCAGTTTCTCTGTCTTTCTCAATCTAAGTGCTTACCGGGTAACTGGAGGCCACTTGGTTGCTGGTTTTGGCTGGGCCTTTCTGGACTTTACCCCTCAGCCCCTGTTTATCCATCCCTGTTTACTCTTACTGTTCAACCACCATTCTTTGAGCTGCTCAGACTCTGCCTTTCTACTCCCTGGGTCCTT	300	regLM	23	4.90273	-0.0191656	-0.0856892	3.5703	-0.0191723	0.450032
gen_13592	ACCACAGATCAAGAATCAGGGTAAGAAAGGGGAGATGGATGCTGTTTCCTAGCTTTTTCACCACCCGCTTTGTGACATCAGGCAAGTCGCCAGTCTGTGTGTGTGTGCCCCAGCTGTGAGCCACCTGACCCCTCAGGATTTCAGAAGTCTGTAAAGAACTTTGATCTCAGCAGTAAGCAAACACAAGTTATTGCACATCC	300	regLM	98	5.07514	0.171106	0.0471025	4.36332	0.17109	0.221153
gen_13953	ACCACAGATCAAGAATCAGGGTAAGAAAGGGGAGATGGATGCTGTTTCCTAGCTTTTTCACCACCCGCTTTGTGACATCAGGCAAGTCGCCAGTCTGTGTGTGTGTGCCCCAGCTGTGAGCCACCTGACCCCTCAGGATTTCAGAAGTCTGTAAAGAACTTTGATCTCAGCAGTAAGCAAACACAAGTTATTGCACATCT	300	regLM	98	5.05374	0.16745	0.047959	4.27913	0.167376	0.212227
gen_13020	ACCACAGATCAAGAATCAGGGTAAGAAAGGGGAGATGGATGCTGTTTCCTAGCTTTTTCACCACCCGCTTTGTGACATCAGGCAAGTCGCCAGTCTGTGCGTGTGTGCCCCAGCTGTGAGCCACCTGACCCCTCAGGATTTCAGAAGTCTGTAAAGAACTTTGATCTCAGCAGTAAGCAAACACAAGTTATTGCACATCA	300	regLM	97	5.05561	0.188648	0.112547	4.36766	0.188699	0.420156
gen_11719	TTCTGGACTTTAATCAGTTTCTCTGTCTTTCTCAATCTAAGTGCTTACCGGGTAACTGGAGGCCACTTGGTTGCTGGTTTTGGCTGGGCCTTTCTGGACTTTACCCCTCAGCCCCTGTTTATCCATCCCTGTTTACTCTTACTGTTCTGTCACCAGCAAATAGGCACCCCCACTCACTGTTCAACTCTGCCTGTCTCCAC	300	regLM	24	4.88791	0.0603678	-0.225974	3.91308	0.0603754	0.207625
gen_10753	ACCACAGATCAAGAATCAGGGTAAGAAAGGGGAGATGGATGCTGTTTCCTAGCTTTTTCACCACCCGCTTTGTGACATCAGGCAAGTCGCCAGTCTGTGTGTGTGTGCCCCAGCTGTGAGCCACCTGACCCCTCAGGATTTCAGAAGTCTGTAAAGAACTTTGATCTCAGCAGTAAGCAAACACAAGTTATTGCATGAAT	300	regLM	98	4.94845	0.145076	0.105121	3.65169	0.14506	0.142766
gen_14047	TTCTGGACTTTAATCAGTTTCTCTGTCTTTCTCAATCTAAGTGCTTACCGGGTAACTGGAGGCCACTTGGTTGCTGGTTTTGGCTGGGCCTTTCTGGACTTTACCCCTCAGCCCCTGTTTATCCATCCCTGTTTACTCTTACTGTTCTGTCACCAGCAAATAGGCACCCCCACTCACTGTTCAACTCTGCCTGTCTCAGC	300	regLM	25	4.87827	0.104388	-0.162801	3.99801	0.10442	0.228981
gen_14008	ACCACAGATCAAGAATCAGGGTAAGAAAGGGGAGATGGATGCTGTTTCCTAGCTTTTTCACCACCCGCTTTGTGACATCAGGCAAGTCGCCAGTCTGTGTGTGTGTGCCCCAGCTGTGAGCCACCTGACCCCTCAGGATTTCAGAAGTCTGTAAAGAACTTTGATCTCAGCAGTAAGCAAACACAAGTTATTGCACATTA	300	regLM	97	4.96252	0.190854	0.0627753	4.23178	0.190844	0.216929
gen_10790	TTCTGGACTTTAATCAGTTTCTCTGTCTTTCTCAATCTAAGTGCTTACCGGGTAACTGGAGGCCACTTGGTTGCTGGTTTTGGCTGGGCCTTTCTGGACTTTACCCCTCAGCCCCTGTTTATCCATCCCTGTTTACTCTTACTGTTCTATCTCCAGCATTGCTCACCCTCAGGGAACTGGCCCCTTGTAGGGGCCCCCAC	300	regLM	23	4.93588	0.178415	0.0513477	3.7942	0.178458	0.242957
gen_13989	AACGAGCATGCTGCCTTCAAGCATCTGTTTAACAAAGCACATCTTGCAGCGCCCTTAATCCACTTAACCCTGAGTTGACACAGCACATGTTGCAGAGAGAACGGGGTTGGGGGTAAGGTTATAGATTAACAGCATCCTAGGACAGAAGGTGGACTGTTGGCCAAGGTCACATAGCTAGGGAAAGAAAGTTTTGAACTTTG	300	regLM	77	4.74209	-0.0109984	-0.706626	3.08893	-0.0109934	-0.84248
gen_13810	TTCTGGACTTTAATCAGTTTCTCTGTCTTTCTCAATCTAAGTGCTTACCGGGTAACTGGAGGCCACTTGGTTGCTGGTTTTGGCTGGGCCTTTCTGGACTTTACCCCTCAGCCCCTGTTTATCCATCCCTGTTTACTCTTACTGTTCTATCTCCAGCATTGCTCACCCTCAGGGAACTGGCCCCTTGTAGGGGCCCCCGG	300	regLM	22	4.93028	0.177407	0.0573635	3.77659	0.177472	0.288056
gen_10868	TGGTGATGACTTTTACCAAGCATACTGCCTGTAAACATTTTGTTAACAAGGCACATCCTGCACAGCCCTAGATCCCTTAAACCTTGGTTCCATAAAACAAATGTTTCTGTGAGCTCAAGGTCGGGGCTAAAGTTACAGATTAACAGCATCTCAGGGCAAAGCAATTCCAAAGCTCATAAAGGTTGGCCAGGGTCATGGTG	300	regLM	21	4.55496	-0.423913	-0.196081	5.25238	-0.42393	0.0752377
gen_10384	GTGGTAAAGTCTGGGTTTCTAGTGTGCCCATTGCCCAAATAGTGTACATTGTACCAAACAGGCAATTTTTCAACCTCATCCCCCTCCCCACCTTCCCATTTTTTGTAGTGTCCAATGTCCACTATTCCGCTCTGAATGTCCCTGTGTTCTCACTGTTTAACTTCCACCTGTGAGTGAGAACATGCAGTGTTTGCTTTTTT	300	regLM	97	4.81765	0.0686629	-0.310426	1.96622	0.0686251	-0.502656
gen_14564	AATGGTATTCATTTCATGCTTGATAAATTTCAAGACCTGATTATTTTGCAATATCAATGTTGATAAAAGTTAAATATTAACCAGATAATCGAAAGTTATCCTTTAACGTCTGCTACCATAGAATAAGAATTTCAGACTGACTCCCAGTTAGTTAAATATTTAATTGGTAAGAAAAAGTGAAAAAAATGGAGAGAAAGGTC	300	regLM	95	4.78644	0.0675045	0.0530035	2.6299	0.0674892	0.439291
gen_14539	CTGCTGTTTAAAGAGAATGAAATCAACAACAGCTAGCCTTTAGTGAGCCCTTTGTATAGTCAGAAACTATTCTAAGCTTTACACAAGACTGATCCTCTTTGTTCTGCCTAAGTCAACAACAACGGTTAGAGGAACACCAATGAATCACCCAACTAGTTTTCACATAAAGTAGTGGTTCAAAGAGCCACCTGCTTGTGCCA	300	regLM	97	4.70527	0.0109436	-0.255725	2.32211	0.0109602	-0.156581
gen_10365	ACCACAGATCAAGAATCAGGGTAAGAAAGGGGAGATGGATGCTGTTTCCTAGCTTTTTCACCACCCGCTTTGTGACATCAGGCAAGTCGCCAGTCTGTGTGTGTGTGCCCCAGCTGTGAGCCACCTGACCCCTCAGGATTTCAGAAGTCTGTAAAGAACTTTGATCTCAGCAGTAAGCAAACACAAGTTATTGCATGAAG	300	regLM	98	4.8707	0.176497	0.136962	3.53495	0.176487	0.149708
gen_12324	TTCTGGACTTTAATCAGTTTCTCTGTCTTTCTCAATCTAAGTGCTTACCGGGTAACTGGAGGCCACTTGGTTGCTGGTTTTGGCTGGGCCTTTCTGGACTTTACCCCTCAGCCCCTGTTTATCCATCCCTGTTTACTCTTACTGTTCTATCTCCAGCACTGCCCGTTGTTGGACACTCCATCCCATGGCCACCCATTTAT	300	regLM	20	4.55256	-0.118538	-0.12559	2.76386	-0.118523	0.291067
gen_10736	TTCTGGACTTTAATCAGTTTCTCTGTCTTTCTCAATCTAAGTGCTTACCGGGTAACTGGAGGCCACTTGGTTGCTGGTTTTGGCTGGGCCTTTCTGGACTTTACCCCTCAGCCCCTGTTTATCCATCCCTGTTTACTCTTACTGTTCTATCTCCAGCACTGCCCGTTGTTGGACACTCCATCCCATGGCCACCCATTTAA	300	regLM	20	4.55731	-0.110066	-0.129115	2.79013	-0.110093	0.306251
gen_11733	TTCTGGACTTTAATCAGTTTCTCTGTCTTTCTCAATCTAAGTGCTTACCGGGTAACTGGAGGCCACTTGGTTGCTGGTTTTGGCTGGGCCTTTCTGGACTTTACCCCTCAGCCCCTGTTTATCCATCCCTGTTTACTCTTACTGTTCTATCTCCAGCACTGCCCGTTGTTGGACACTCCATCCCATGTCCTAGTGAAATT	300	regLM	20	4.51584	-0.123467	-0.228386	2.77036	-0.123424	0.0939687
gen_14716	TTCTGGACTTTAATCAGTTTCTCTGTCTTTCTCAATCTAAGTGCTTACCGGGTAACTGGAGGCCACTTGGTTGCTGGTTTTGGCTGGGCCTTTCTGGACTTTACCCCTCAGCCCCTGTTTATCCATCCCTGTTTACTCTTACTGTTCTATGCCCTTCCCTGGGGCTCTCCATCCTGTGTCCTTCTCTGTGTCTCTCCCCC	300	regLM	25	4.56227	-0.0950587	0.0404361	2.72261	-0.0950627	0.188798
gen_14393	TTCTGGACTTTAATCAGTTTCTCTGTCTTTCTCAATCTAAGTGCTTACCGGGTAACTGGAGGCCACTTGGTTGCTGGTTTTGGCTGGGCCTTTCTGGACTTTACCCCTCAGCCCCTGTTTATCCATCCCTGTTTACTCTTACTGTTCTATCTCCAGCACTGGGTCAAGAATGCCCTTCCCCAGGGAGGACCTTCCCTGGG	300	regLM	22	4.57222	0.0600191	-0.0789423	3.46794	0.0600328	0.192555
gen_12305	TTCTGGACTTTAATCAGTTTCTCTGTCTTTCTCAATCTAAGTGCTTACCGGGTAACTGGAGGCCACTTGGTTGCTGGTTTTGGCTGGGCCTTTCTGGACTTTACCCCTCAGCCCCTGTTTATCCATCCCTGTTTACTCTTACTGTTCTATGCCCTTCCCTGGGGCTCTCCATCCTGTGTCCTTCTCTGTTCTGCCCTTAT	300	regLM	26	4.43201	-0.192618	-0.0533507	2.63765	-0.192572	0.145202
gen_13644	CTGCTGTTTAAAGAGAATGAAATCAACAACAGCTAGCCTTTAGTGAGCCGTTTGTATAGTCAGAAACTATTCTAAGCTTTACACAAGACTGATCCTCTTTGTTCTGCCTAAGTCAACAACAACGGTTAGAGGAACACCAATGAATCACCCAACTAGTTTTCACATAAAGTAGTGGTTCAAAGAGACACTTGATTCAAGTG	300	regLM	95	4.61632	-0.0452482	0.135458	2.86698	-0.0452326	0.262969
gen_14243	CTGCTGTTTAAAGAGAATGAAATCAACAACAGCTAGCCTTTAGTGAGCCCTTTGTATAGTCAGAAACTATTCTAAGCTTTACACAAGACTGATCCTCTTTGTTCTGCCTAAGTCAACAACAACGGTTAGAGGAACACCAATGAATCACCCAACTAGTTTTCACATAAAGTAATGGATGGCCTTGCCTTAACTTATTTACC	300	regLM	96	4.56893	0.126176	-0.0120308	2.23243	0.126166	0.345377
gen_12545	CTGCTGTTTAAAGAGAATGAAATCAACAACAGCTAGCCTTTAGTGAGCCCTTTGTATAGTCAGAAACTATTCTAAGCTTTACACAAGACTGATCCTCTTTGTTCTGCCTAAGTCAACAACAACGGTTAGAGGAACACCAATGAATCACCCAACTAGTTTTCACATAAAGTAGTGGTTCAAAGACCCCTGGCTTCTTCAAA	300	regLM	97	4.553	0.0368733	0.123315	1.49969	0.0368497	0.0323936
gen_12882	CTGCTGTTTAAAGAGAATGAAATCAACAACAGCTAGCCTTTAGTGAGCCGTTTGTATAGTCAGAAACTATTCTAAGCTTTACACAAGACTGATCCTCTTTGTTCTGCCTAAGTCAACAACAACGGTTAGAGGAACACCAATGAATCACCCAACTAGTTTTCACATAAAGTAGTGGTTCAAAGAGACACTTGATTCAAGTC	300	regLM	95	4.59458	-0.0554815	0.166202	2.91974	-0.0555483	0.303679
gen_13569	CGTGGAGCAGCCGAGGGGGGAGATTGCTTTCACCACTTCCCAGCATCTATTGCAGATTCCACCCTCAAACATGTTGTAAGGACTCTTTATTCAAGGTAATGTTTGAACCCTGCTGAGCCAGTGGCATGGGTCTCTGAGAGAATCATTAACTTAATTTGACTATCTGGTTTGTGGATGCTTTTTTAATCATTAAGTGAATT	300	regLM	100	4.50077	0.0791328	-0.0887585	3.08222	0.0791257	-0.0317098
gen_11487	CGTGGAGCAGCCGAGGGGGGAGATTGCTTTCACCACTTCCCAGCATCTATTGCAGATTCCACCCTCAAACATGTTGTAAGGACTCTTTATTCAAGGTAATGTTTGAACCCTGCTGAGCCAGTGGCATGGGTCTCTGAGAGAATCATTAACTTAATTTGACTATCTGGTTTGTGGATGCTTTTTTAATCATTAAGTGAATG	300	regLM	100	4.50553	0.0868515	-0.0686792	3.03069	0.0868665	-0.0363675
gen_11531	CTGCTGTTTAAAGAGAATGAAATCAACAACAGCTAGCCTTTAGTGAGCCCTTTGTATAGTCAGAAACTATTCTAAGCTTTACACAAGACTGATCCTCTTTGTTCTGCCTAAGTCAACAACAACGGTTAGAGGAACACCAATGAATCACCCAACTAGTTTTCACATAAAGTAGTGGTTCAAAGACCCCTGGCTTCTTCAAC	300	regLM	97	4.54085	0.0299707	0.124132	1.47993	0.0299693	0.0606595
gen_12167	CGTGGAGCAGCCGAGGGGGGAGATTGCTTTCACCACTTCCCAGCATCTATTGCAGATTCCACCCTCAAACATGTTGTAAGGACTCTTTATTCAAGGTAATGTTTGAACCCTGCTGAGCCAGTGGCATGGGTCTCTGAGAGAATCATTAACTTAATTTGACTATCTGGTTTGTGGATGCTTTTTTAATCATTAAGTGAGCT	300	regLM	99	4.54632	0.130063	-0.0486547	3.31637	0.130083	-0.0252247
gen_10804	CTGCTGTTTAAAGAGAATGAAATCAACAACAGCTAGCCTTTAGTGAGCCCTTTGTATAGTCAGAAACTATTCTAAGCTTTACACAAGACTGATCCTCTTTGTTCTGCCTAAGTCAACAACAACGGTTAGAGGAACACCAATGAATCACCCAACTAGTTTTCACATAAAGTAATGGATGGCCTTGCCTTAACTTATTTAAC	300	regLM	96	4.50524	0.0939144	0.0613033	2.04269	0.0938967	0.342564
gen_12427	CGTGGAGCAGCCGAGGGGGGAGATTGCTTTCACCACTTCCCAGCATCTATTGCAGATTCCACCCTCAAACATGTTGTAAGGACTCTTTATTCAAGGTAATGTTTGAACCCTGCTGAGCCAGTGGCATGGGTCTCTGAGAGAATCATTAACTTAATTTGACTATCTGGTTTGTGGATGCTTTTTTAATCATTAAGTGAATC	300	regLM	100	4.49628	0.0895748	-0.0719213	3.06675	0.0896126	-0.0216533
gen_11193	CTGCTGTTTAAAGAGAATGAAATCAACAACAGCTAGCCTTTAGTGAGCCCTTTGTATAGTCAGAAACTATTCTAAGCTTTACACAAGACTGATCCTCTTTGTTCTGCCTAAGTCAACAACAACGGTTAGAGGAACACCAATGAATCACCCAACTAGTTTTCACATAAAGTAGTGGTTCAAAGAGGCACTTACCTGTGCCA	300	regLM	94	4.49441	0.0907934	-0.00190256	1.87624	0.0908401	-0.0552184
gen_11775	AACTGCAAGCTTTCACCTCTGACTGATCTTTGACTTAGTGCAAGCAGTAAGGGAAGGCTTTGGCAGAGTTGTAAATGACCTGGCTAAGCACCGAAAGAGGGCTCCAACAAAGAGTCATTGCGCAAAGAGTGGGCAAATATTTTTCCTTTTTTGTTTGTTTTTTGAGACAGAGTCTCACTCTGTCACCCAGGCTGGAGTGC	300	regLM	101	4.49648	0.0937006	-0.292896	3.29411	0.0937455	0.184749
gen_11762	AACGAGCATGCTGCCTTCAAGCATCTGTTTAACAAAGCACATCTTGCAGCGCCCTTAATCCACTTAACCCTGAGTTGACACAGCACATGTTGCAGAGAGAACGGGGTTGGGGGTAAGGTTATAGATTAACAGCATCCTAGGACAGAAGGTGGACTGTTGGCCAAGGTCACATAGCTAGGGAAAGAAAGTTTTGAACTTGG	300	regLM	78	4.43877	0.0389948	-0.746498	2.14433	0.0390355	-0.853226
gen_14417	CTGCTGTTTAAAGAGAATGAAATCAACAACAGCTAGCCTTTAGTGAGCCCTTTGTATAGTCAGAAACTATTCTAAGCTTTACACAAGACTGATCCTCTTTGTTCTGCCTAAGTCAACAACAACGGTTAGAGGAACACCAATGAATCACCCAACTAGTTTTCACATAAAGTAGTGGTCCAAGCAGTCACCAGCTGCCATCA	300	regLM	95	4.53727	0.157361	0.120852	1.57422	0.157382	0.212526
gen_14512	CTGCTGTTTAAAGAGAATGAAATCAACAACAGCTAGCCTTTAGTGAGCCCTTTGTATAGTCAGAAACTATTCTAAGCTTTACACAAGACTGATCCTCTTTGTTCTGCCTAAGTCAACAACAACGGTTAGAGGAACACCAATGAATCACCCAACTAGTTTTCACATAAAGTAGTGGTCCAAGCAGTCACCAGCTGCCATGT	300	regLM	94	4.50028	0.114945	0.149124	1.58205	0.114934	0.25974
gen_12858	CGTGGAGCAGCCGAGGGGGGAGATTGCTTTCACCACTTCCCAGCATCTATTGCAGATTCCACCCTCAAACATGTTGTAAGGACTCTTTATTCAAGGTAATGTTTGAACCCTGCTGAGCCAGTGGCATGGGTCTCTGAGAGAATCATTAACTTAATTTGACTATCTGGTTTGTGGATGCTTTTTTAATCATTAAGTGAATA	300	regLM	100	4.42364	0.0765027	-0.100955	2.70599	0.0765256	-0.0529949
gen_12092	CTGCTGTTTAAAGAGAATGAAATCAACAACAGCTAGCCTTTAGTGAGCCCTTTGTATAGTCAGAAACTATTCTAAGCTTTACACAAGACTGATCCTCTTTGTTCTGCCTAAGTCAACAACAACGGTTAGAGGAACACCAATGAATCACCCAACTAGTTTTCACATAAAGTAGTGGTTCAAAGAGGCACTTACCTGTGCCG	300	regLM	94	4.52411	0.179838	0.0250665	1.89297	0.179818	-0.0323662
gen_14505	CTGCTGTTTAAAGAGAATGAAATCAACAACAGCTAGCCTTTAGTGAGCCCTTTGTATAGTCAGAAACTATTCTAAGCTTTACACAAGACTGATCCTCTTTGTTCTGCCTAAGTCAACAACAACGGTTAGAGGAACACCAATGAATCACCCAACTAGTTTTCACATAAAGTAGTGGTCCAAGCAGTCACCAGCTGCCATGC	300	regLM	95	4.4975	0.145378	0.170813	1.57859	0.145382	0.234081
gen_12418	TGGTGATGACTTTTACCAAGCATACTGCCTGTAAACATTTTGTTAACAAGGCACATCCTGCACAGCCCTAGATCCCTTAAACCTTGGTTCCATAAAACAAATGTTTCTGTGAGCTCAAGGTCGGGGCTAAAGTTACAGATTAACAGCATCTCAGGGCAAAGCAATTGCTCATCTGGCAAAGTAGTTTTTACAGAAGGCAA	300	regLM	20	4.42253	-0.272603	0.133854	4.88301	-0.272647	0.0211859
gen_11561	TGGTGATGACTTTTACCAAGCATACTGCCTGTAAACATTTTGTTAACAAGGCACATCCTGCACAGCCCTAGATCCCTTAAACCTTGGTTCCATAAAACAAATGTTTCTGTGAGCTCAAGGTCGGGGCTAAAGTTACAGATTAACAGCATCTCAGGGCAAAGCAATTGCTCATCTGGCAAAGTAGTTTTTACAGAATTCCA	300	regLM	20	4.4599	-0.291599	0.179228	4.86061	-0.291611	0.099253
gen_10955	CTGCTGTTTAAAGAGAATGAAATCAACAACAGCTAGCCTTTAGTGAGCCCTTTGTATAGTCAGAAACTATTCTAAGCTTTACACAAGACTGATCCTCTTTGTTCTGCCTAAGTCAACAACAACGGTTAGAGGAACACCAACGAATCACCCAACTAGTTTTCACATAAAGTAGTGGTTCAAAGAGCCACTTACTTGTGCCC	300	regLM	95	4.35661	0.0502345	0.0780679	1.56756	0.0502502	0.00966312
gen_12912	TGGTGATGACTTTTACCAAGCATACTGCCTGTAAACATTTTGTTAACAAGGCACATCCTGCACAGCCCTAGATCCCTTAAACCTTGGTTCCATAAAACAAATGTTTCTGTGAGCTCAAGGTCGGGGCTAAAGTTACAGATTAACAGCATCTCAGGGCAAAGCAATTGCTCATCTGGCAAAGTAGTTTTTACAGAATTTCA	300	regLM	20	4.38086	-0.291	0.106817	4.70799	-0.290978	0.045377

## Sheet: README
Supplemental Table S7: 100 selected synthetic human enhancer sequences generated by regLM for specific activity in each of 3 cell lines.
