# Supplementary material for: Designing realistic regulatory DNA with autoregressive language models
Source: HighWire-hosted journal article supplement (doi:10.1101/gr.279142.124), 2024-09-01
Supplement: Supplemental_Table_S8.xlsx [file Supplemental_Table_S8.xlsx]

## Sheet: Supplemental_Table_S8
	Sequence	label	Group	independent_pred_hepg2	independent_pred_k562	independent_pred_sknsh
gosai_1054	TGAGTAATCACGCCACCTGCCGCCGTAGGGCCATTGCATAGGTCTATATTAATGCAAATCTCTAAATCAGAGCAAATCACAGCATTGAATTCCTCCCACAAAGTTAATGATTAGCCACCAATGACCACACCTGAGCATGATCAAAGGCCCTATTGTAAGGATGATGGACTTTAGCACGCTATTCAACGCTGCATGTTCGA	300	Simulated_Annealing (G)	4.84861	-0.102312	0.566842
gosai_252	CAGATTTGAGGTTGCCCGATAAAGACCCAGTACAAAGGTCGCTTTGTGAGTCAAAATACGAGTGCAAAGTCCAATATACCATCATGACTTACCCAAGTAAATGTTTAGCGAAGTAGTCACTGCGTCCTGTACCGTGACATTTTGCAAGCCGGTATCGAAAGGCGTGAAGCGTGAGTGCACACCTGTCCGGCACTGGTACC	300	Simulated_Annealing (G)	4.80071	0.157804	0.58354
gosai_1453	GTGCACCTGCTTCCCCTCGACATCCGCGCCTTGCCAATCCTAATCTCCGGGCGCCTAGGCCGCTTGCTGCAGGTGAAATACCTGTCTTCGCTAAATTTCGTGACGTCCAGGCGTGAGTGGGGGCAAAGTGCATCTCCGATGTACGCACAGAATAGTCAATAATTAACCAGAAAAGGCCAGAGATCCCGACAATCACTGCA	300	Simulated_Annealing (G)	4.9225	0.312946	0.534061
gosai_2110	GTGCGCACGGTCTGATTAATCATTAACCAAGATTACGATATGGTATAAAACATTACCTGCACTGTTCTTAAGCTGCGGACCTAGGCTAGAAGTGATTCACGTATAAGCCAAACGTAGCGTAAATACGGCATTTTGCAACCAATCTGGGGTTCAAAGTGCATTGGATCACGCACTCCTTGAATAAATTTGGGCACGATGTA	300	Simulated_Annealing (G)	4.58424	0.159548	0.619451
gosai_365	GTTGGCAATACTGGTTATAGATCAACCTGAATTCTTACTCATGTCCTTGGCACGAGAACAACAAGGGAACTCTTTGAACAGACGTCCGAACTTCACCTTTGATCAAAGGTATAGTCACAGGGAAAGAGATACAAAGGGCCCATTGTTACTCTAGGGCACATTTCCCATTCAGCAGGATGGTCGGGGCTATGCCACCTTTA	300	Simulated_Annealing (G)	4.53086	0.254316	0.668195
gosai_3519	GGCAATCTGTGGGTGACGTTGGATGCCTACCTCAATATTGACCTTGACCGCACGAGACCGGTGCAAACATTGTTTGCCTTTGCTTGCCGGAAATCAGTGACTGACAAAGGGAGTTGTGTAACATCAATGCCTCATTGTCAAACGATAGTGATCTTTATGAATACCTGTAAGCATGGTAGCGCGTAATAGAGTAGACGGGG	300	Simulated_Annealing (G)	4.44314	0.144009	0.788996
gosai_3791	ATACCCAGCACGCCGTCGGGGAAGCCAGCCGTGATTTAGTTAATGATTTACCTCTGCCTCATCACGATGACCGCTGTTGACATGAAAGGACAAGTGATGTCTTGTTCCTCTTACCTGACTATATACGCATCCCATCGTAAGGGTCAGGGATAATAATTAACAGGTGTACAACGTCGCCCTGACCTATGTCTACGGCATGC	300	Simulated_Annealing (G)	5.36107	0.0526967	0.449723
gosai_1146	TAGGGAGACCTGCCGTCGACACTACCCATGGACTTTGGACCTACCGTCCCCATTCGTCATACGAAAAATTCCCCTAGGTGATGGTTGTAATACACTAACTTCAATATGGGCTTAGGAGTGAGACATTGCGTGACCACAGTGATTTCTGCTCGCTAGTTAATGGTTAACAAAGGTGGTGGCAAAATCTGTGCCACCAAGTT	300	Simulated_Annealing (G)	5.41025	0.00131908	0.312688
gosai_2032	CTGTCAGGTTGAGGTGGGAAGTAACAGCCATCGACGGTGCCCTTTGGCCCGTTTTCTCAGTGAATCACCAGGCTACAATAAAGGCCCGGTCAATCATTAACCATCATACAACCACGTCAAAAAGATCGAAGGGTCAATTGCCACTTTGAACCACCTCCTGGCATTTGGCGCTCACCTGGGTACTGACCGCAGTGGACAAC	300	Simulated_Annealing (G)	5.3481	0.371088	0.598262
gosai_3938	TATACCTTCAGGTGCAAAGTTCACTGGGTGCGGCTTTATGCGCGACAAACAATGAGTTACGGGTAATGATTAACTCCCATACCAGACGCAACAGATTCCATTAGGAATCTACTGGAAACGTAAGGTATCATGGGCGAGGTAACCCTCAAATCTTGATGTAGTCGTCGTCTACCAAGACCGCTGCAGAGATTGCATATCCC	300	Simulated_Annealing (G)	4.46465	0.273191	0.716215
gosai_2661	TCTGTCTATGTGCATGTGATGTCTCTCACCGGTGACGCAAAGATTACCTGATCCGACTTCAATCTGGCTCATAGGACACTGTGGACTTTGGACCCGTGATTTTAGGGTGAAATCTCACAATGCAACTGTTTGGATAGCAGCTAGGGGTTCCGTGGCATTGTGTACCCATACCAAAGGTCGATGCCCTTTGATTGTATTGA	300	Simulated_Annealing (G)	4.60386	0.371955	0.530788
gosai_2358	CCGGCAATTTCCAACCTACGGTGGTGTTAGCTAGTTAACCATTAACCAGGCATTAGTCCATCGGTACAGATGTATGAATCATGCTAAGTTGTTCTGGTAACCTTAGAAACCAAAGTTCAAAGCCGAGATTGGGTCCACACCCCAATCCGCATCCTACGCACGAACTACCGTGGTATGGATGCATTGGACCTGCACACCTG	300	Simulated_Annealing (G)	5.24249	0.357866	0.67388
gosai_371	CATCCACCTTTAGTTAATGATTAACCTAGAAAAGGATGGGTATCCCGGGAAGTCTGTGCCATACAAGTCTGTCTGCCTGCCAGGGGCAAAGACCAGTATGAGTGTTGTGTCAATGGATACGGGGCCTAGAGCGCAGACGAACAGTGGTGACCTTTCTGCAGGTACGCGATTTACACCTCTAGCCACCCGGCTGAATTACC	300	Simulated_Annealing (G)	4.43269	0.197965	0.500141
gosai_93	CGTGCTCTCCCGGGTTATCTAAAATCACGTCCCCTACTAGAGGCTCAAAGTCCAGACTGATGCATCGGGCCAGTTCTAGGTTAATCATCTGCACAGGAACCTATGGCCCCAGCGCAATAAACTAGTGAGCAGGTATTTGACGCATTATGTCACAATCACAGCAATCGTTATTGAGCGCAAAGTCCACCTGTGTGACCGCG	300	Simulated_Annealing (G)	4.57535	0.354705	0.582148
gosai_3319	CGTTGGCATCGCGAACCTCAAGCTTGTCAGTACCTGTGCGCGCGTTCCGGCCCCAAGCCGCGATCTGGTTAATCATTAATAACTGTGCCCATTGTGTAACACCACAGAGTGTTTTTAGTGAGTTGGCAATAAACCAGTAAGTTATGCAGGCCGCCTTCTCGGGATCGTGGGAACTACATGCCCGCAGGTGCAATGATGGG	300	Simulated_Annealing (G)	4.54642	-0.000855472	0.291404
gosai_2289	TCGAGGCTCGAATTCGAAGTCGATACTTGGCATTTAGCGTTGAACCCGTCACATCCTACACATGTCCGCAATAGCCTTGTTCTAAGACATAACCCTGGTTAATCATTAACTCCTGATTTATTTAAGGATTGATCCCTTTTGGCCCGCTCCTGTCAAGTTAATTATTAATACTAGGCACCCGTCCAAATCAGTGCTTCTAC	300	Simulated_Annealing (G)	4.50697	0.168524	0.37541
gosai_1994	ACCGCTCCTCGACATTCCACGGGTTTGCCCATATGGTTAATCATTAACCGGGTATAGCATACCTTCATGGGTCGTCTGTTAATAAGTAAACTATCGGTTCCTGACAGTGCACGTCGGATGCCATGTATCATGGATATCGAATCTTTGGAACGGCATGCACTGATTTAAAATTCGCACTGAACAGGTAACTCAAGTGCAGG	300	Simulated_Annealing (G)	5.44049	0.18037	0.213064
gosai_2639	GCAATTGAACAGGAGTCTCCGGTGGTATAGGCACGCGGGCAAAGCCTTGCAACAAATCATGACGTTATTCCACCTGTGCTCAGCGTGGGATAAATTTTGTCCCGCAAATCAGTGAGCAAAGTCCATCACAGCATTTGGTGGTTAATCATTAACCTGGCACCAACGTTGCCCTGCCATCGGCAGTTGCTGATGGTGCCAGG	300	Simulated_Annealing (G)	4.62935	0.124918	0.336826
gosai_1924	TCTCCCATTGGCGGCGAGATGTGCACTTTGATTTATTCGCGGTATGCCCCTTGTGCAATGTCCCGTACTGGACTTTGATCTCTCATGTAGTAACTCTGTTAAGTCCAAAAGGGATAGGTCTAGTTAATCAGTAACCACCTTACATTACTTTTCTATACGCAACTAAAGACTGAGATTAGTTCACGACATCGGGGTTAAAC	300	Simulated_Annealing (G)	5.48788	0.342648	0.416697
gosai_1894	TTATGTCTTCTCTAATAAGTCGCAATTATGACCTAGTTGGACTTTGACCCCTAGAGTCGTGATTTTTCCTCGATGGTCTCAATCATGGTAAATCATTAACGTATCCATCCTAAATGGGTGGCCTGAGTAACCTGGCACTAGTTCCATCCTGCTATGCCAACCAAAGGTTAATCATTAACTACCCAAGTGCAGGACAGGGC	300	Simulated_Annealing (G)	5.45107	0.346247	0.377818
gosai_3326	CCTTTGCTGTCCCCTTTGACTGGTCATGGCATACCAAGCATTCCGAGTATAGTCACCCGAGGTGCAATCTGTGATGTCTGTATCCGTGAATATTGACTCAGAGCAGCCGGACTTTGCACTATCTTAATCACGGTCGTACAATCAAAGCAGTTCACCTGTTCAAAGTCCACAGGTATGGGTTAAAGTCTATCCAGTGCATG	300	Simulated_Annealing (G)	4.77546	0.197914	0.422812
gosai_251	CCTGAGCGATACCCCTAGGGCAAACCTCGTGATCTTTGCTCTGATTCACGACGGCAGGATCAGAACAAATACTCGTTGATCTTTAGCTCGAGAGAACAAATTACTAAATACATAGCAAGGTTAATCATCAATAGTGTCCGTCAATGGGAGCTTTGCACCCTGGGCAAATATTAGACGGTTCCAAGCATGTATACCTGAGC	300	Simulated_Annealing (G)	5.53923	0.0853717	0.164085
gosai_238	TTGGCAAGGGTGCAGACCATTTCGCAAAGATCATACATCCTTGCCTTACATCCAGCGCAGTAAATCACATCTACACGCTTGTAACTTTAGATCGGGCCAAAGTCCATTGCGAGCATAATAGTCTCCGACTGTCTAATTAAATATTAACCAGGGCAATGTCCATCCCCACAAAAAGCTCTCAGGTGAGCTTGGCATAGGTA	300	Simulated_Annealing (G)	5.42668	0.307464	0.307066
gosai_483	TGAGTACGCACTTCTGGCATCGCTTACCATGCATTTAGCGTTGGCGAGGATGGCGCGGCGCCGCTCCCTGAGTTAATAATTAACCGGCAAATCTCAGTATGTGCCCACCAACCACTCCACCAACCATGCAATCCATTGCCCCATTCAGAAGTTAATAATTACCTAGACAGCATCCCTAATGGTATATAGCGTGGCATACC	300	Simulated_Annealing (G)	4.11828	-0.373564	-0.154381
gosai_970	GGGACTGCCAGGCGTTACACCTGTTCATAGTAATCGACGATGAGTCATCCATGCATCATGGACATTGAACCCAATGGAGTCAAGACAATCACTGAAATCTGGTTACTGATTAACCAGATTGAGAGAGCACTGCGAAAAATTCCATAGCCTTGAATCTGTTCTTGGGACCCATACCCAAAGCAGGTGATCTGGCACCCTGG	300	Simulated_Annealing (G)	5.21101	0.0792666	0.281981
gosai_108	TCGTTCAGAAATGACCTTTGCCCGGTGCCAGTGTGGAATACCCATTGCCCACAGGTTAATAATTAATGTAAGATCCGCATTCTGATCACCCAGCATAGCCCTCAGTGATTGCCCATTGGGTGGAGCTGAGATTGATTAATGATTCACCTGCTCAGGTATGAGCTGCTAGATGCCCGTAGGTGAAGGGCCAGTCTACTAAG	300	Simulated_Annealing (G)	5.41673	0.0511719	0.0548788
gosai_1152	TTAAGCAACACAGCACCCTTTCTCGGTTAATGATTAACCTTGCCATGCTTCCGTTGCATTATTGTCCCGGGCAAATACAATACTCTTTGATAATCTATAGCAGCTCAAAGTCCGAGTCGCTACACAAAAGAGTCATAGAGTACATCAATCTCAGCAGCACTCGCTTAGGTTAAGAGTTGTGCGCACACCTGTACAGAGGG	300	Simulated_Annealing (G)	5.40466	0.000225645	0.0331385
gosai_3084	ATGGGTTAATGATTAACCATTACTGTGGCGCGATGGAATCATAGTCGACTGTGATTTAACGGCATGGGTAATGATTAACTGTAAGGACTCGGAACGAGGCGGTGATTCATCGCGTAAAACATTCTCGAAGTGCGCACCTGAACCGATCTGCCTGTGGAATGTACCTCAGGTGTATGCGTTAACAGGTCCCTACAGGTGCA	300	Simulated_Annealing (G)	5.14666	0.218786	0.515079
gosai_2455	TTCCAGAGACGTTCGACGTCTATGTTTGATCCCAGCTGGCCGTGAGGAGTGCCAAATCAATACCCGTCGGCCTGAATATTCTATGTGGACGCGGAATGTAGCTGAGAGTTAATAATTAACCACTAGTAGATCATCCCCTGGCAGGCTAAACATTATCTGTTACAGAGCGGGCACTACCAGTCCGTAGTACCTCGCCTGGG	300	Simulated_Annealing (G)	5.11194	0.21446	0.473852
gosai_246	TACCACAATCAAAGGAACAGTGATTTCCTTTACGACGCGTTGGCATACTGGTTAATCATTAACCTCGCCTGTCGTTCAGCTCATCTTATATATGTTATCAAATCAGTGACTTTGAATTGGTGTACTCAAATCCGTCACAATAGACACCCTCGACGTGTGGATACATATTAGTTAATGATTTAACCCATCAGGTGTGCAAC	300	Simulated_Annealing (G)	4.11611	-0.146698	-0.19707
gosai_3168	CCTCGGCAGGTGTTGCAGAGTTGCCCAGATTGTACTTCATAGGCGTAGCACACTTAGGTTCTCATACACTAACGTTATTGTCTCTACCCAAGCAATCACTGTTAGTTAATCATTAACCAGTTGAACGTAATCCCCAATCGCATAATCTTTTAGCAGTTCAGGTGCAATGGTACAAAGTCCATGAGTATAAATCTGAGCAT	300	Simulated_Annealing (G)	5.29228	0.345095	0.22907
gosai_3174	TGCCCAGATTTAGGAGTCCGACAATTTTGTGTACGCATAGCACCTAGAAGCGTGGAAAATCTGTGCAATGGGTCAAAGTCCAAGGCAATTGGTGAGATAGGCTATGTAACATAATCCCCTAGTTAATCATTGATCCAAGTGTCGGCTGTCTTTGCAATGACAGTAGTGCGCGTTACCTGTTGGATCATGCAAGTAATGCA	300	Simulated_Annealing (G)	5.42796	0.303255	0.198605
gosai_354	CTCAGGTGAGCGGATCTGTATGGGAACACACCTGTCACGCTGCACAGCTACCTCAAAACAATTATTTACTGATCACATCTTAGGTCATCGATCGGAGATGTCAAGCTAATCATTAACCCGAGCAGTGATTCACTAGAGCGAGGGCCACAGCGCACCCAGATTGTTAATCATTTACTTTATCGCACCTGAGGGCAATAAAT	300	Simulated_Annealing (G)	5.53799	0.278692	0.208832
gosai_1427	TATGTAGCAGGTGAGCAACGTGAGTCCCGCGCGTTGAACTCATGTCATTGACCAGAAGGGATTAGCCATAGCCTGGATTAATCATTAACTTGGATTTCTCAACTTTTCTACGGTAAGAGTGATTTCTTGCTACTCAGTGATTTAGCCACTGGGGATATTCGACGGTTAATGATTAACTGTGATTTGAGCCCGGGGCATTC	300	Simulated_Annealing (G)	5.63519	0.229846	0.18951
gosai_1785	TCTGGCGGTCAATTGAGCGATTGGCAAGTCCGGTCGAGTTGACAGTTCGCTGCCATAGCCCAATGGACGACATACCATGGGTCGATTAATGATTAACAGATTTTTCCAGCTCCCTGGGCGAGTAGTAGCGTGTCAAAGTAGTTGCAAACGATAGGAGTTAATGATTAGCTTGCCATTATGTGCTTGATACCTCCTCAAAT	300	Simulated_Annealing (G)	5.52507	0.445636	0.542319
gosai_3630	TCCAAAGTCCAATCTGTACGGCGCGTCGCCACATCTCGGCTCAAGGTCCGGGGCAAAGTCCAGTTCATGTTTGATTTGTCCGTAGCTCACTCAAACTGATCAGCCCCTACTACGGTTTCCTATTAATCTTCCAAAGTCCACCAAGAATCTAATCTTCCCCAAAATAACTCACTGACCCTGTTGTGATTTTCCAAGTAGCC	300	Simulated_Annealing (G)	4.24513	0.208725	0.461766
gosai_399	GTATTCCGACCTCACCCAGCTGCTCACCGGACGTACAGCCTAATTGGCATCGTTGACGGTGACTCCAGGAATCTTCTGGTACCTTGCCCCCGTCCGCCCACGATATGCTGTAGGATGTGACACATCCACCAGGTGCCCGGGGACAGACTAAGTAGGTTAATCACTAACCAGGTCTTTGTACAGATTTTACCTTTACAACC	300	Simulated_Annealing (G)	5.14168	0.217573	0.309526
gosai_139	ATGCCAGATAGATTTGGACAGACGCCCGGTGCCACCCAGTATAAACATATGGGAGCGATGAGACCTTTGAACCGCGATTTGTTTGCACAGGTTGATTAATTATTCACTCTTTGCAAATAGTTCTAAAGCAAACATGACAGACTGGACTTTGTCCCCTTGGCATCTTTATATGCCCAATAAGGTTCGCTACATCCGACGTC	300	Simulated_Annealing (G)	5.13254	0.328034	0.613663
gosai_3035	CCTGGCAGGGTGTGAATGCTAGGTTCAAGCGCGCAGGATGGCCACTCCGATTGTCCTCAAACATTTACCACTGGCCTGGCATGCTGAACTTTGTACGGAAAGCGCTCTTTGATCTAGCCCATCAACACTTCCGTCCAATATTCATCAGTTAATAATTAATTCTATGGACATCCGAGAATAGCTCTGTAGTCTGACCTGGG	300	Simulated_Annealing (G)	5.09331	0.30906	0.660123
gosai_2501	CGACGGGGTTAGCAACCGTAGCAATGCAGTCATAAGTAAGACGTACACCTGTGCTCGGCTGTGATTTCTGGAGGCAAAAATCTTATGGGTTAATCTTTGATCTTCACTGCCCACCGCGTTGTGCAATTGACCTTTGCACTTCCCGCGTCCCATGGTGGGTTACTTTATCGCAAAGGTATGTGCCGGTGAAGTCCAAAGAT	300	Simulated_Annealing (G)	4.46096	0.327259	0.673017
gosai_777	ACGTAACTATTTGCAGGTGCCAGGTAGCACCATCGGTTTCCTAGCACACCCCATTGTTTTATCGTTGATTTAGGCGGACTTGGTCCAAAGTCCAATATTGAGATACAGCATCCCGCGTTTAGGTTAATCATTATCCGAAGTATACCATCCGTCGCTGGGTGCATAGTCCACAGTGGCATTCGTGGGCACTGCCAATTTGG	300	Simulated_Annealing (G)	4.03066	0.142544	0.400988
gosai_2769	AGAGTCATGTTAAATCCGGTGGCGTATAGCCGTGATTGCCTCGGCGTCAGGTTTAGGCTGAACTCATGGGCCGCACTTTGAACCTTGGACCTTTGCCGGGAAGTGACCTTTTCACTTCAGGTATGGTAATATTTGACTAAGACCCGCCGATTACTAACTCAAAGATTGGCACTGCCGAGCATATGCAGGAGCATCGACGG	300	Simulated_Annealing (G)	4.60284	0.404737	0.518392
gosai_2770	TAGTCTTGCGAGCCAAAGTTCGAAGTTGGGCAAATATTTGATCAGTGATGTCGTGAGGGTCAAAGTCCAATAAATCAAAGCACTGCCCTCCACCCTATCTTTTATTGGGCTTTGTGGGCCATACCGCCCGTATGTACTTTGCGCATAGCCCAAATCCAGTGAGCAGCACAGGGGACTGCTACCTGTATAATGCTCACCTG	300	Simulated_Annealing (G)	4.3767	0.175525	0.298941
gosai_2507	CGCACCTGCACTGGCACAGCCCTGGCCAGTAATCAGCAGATGCAAGCAAGTCGCAATCTTTCATCTATTGCTATGCGGAGTAAATATTTACCTTGTGGTTGACGCAGCACTGCCCTCACGAGAAATCAAAGCCAAGTGAAAAGGACGGCTTAAACATAATTCGCGTTGTTGGGCACACTCAGTGCCGGTTAATGATTGAC	300	Simulated_Annealing (G)	5.42435	0.373092	0.361177
gosai_1095	CAATGCTAGTTCATGAGAGGGAATCTGCCTCCTGGACTTTGAACCAGGTCACTCACCGTTGTCAATCACGGCAGGGTCAGTTAGGCAATCACAATGATTTCCGTTGTTTGAGAAATACCAGACTGACCGGTCAATAAGGTGACAGGTGGAAGTCAGGTATAACAAAGGTTCTATTGTTCAACACCTTGACGCAATGTTGG	300	Simulated_Annealing (G)	4.45064	0.235703	0.239053
gosai_1945	GAACAGGTGGCTAGTGTGATTTCCTTTACTCACGTTGGCCAGATTGGACTTTGGTCCCATACGCAGCTTGAATGCCCATGTAGTCAATCAATAACATAACAAGCAGTGAATAAACAACAGATTATGCAGCACACAGGGCAGTTGTTAATCATTGACACCTGCCATGCGTAAGGGCTTAGATCAATCTGTGCCAATGTCTA	300	Simulated_Annealing (G)	5.3195	-0.0976092	-0.173556
gosai_3059	GGTAGATAGACGCGCGAGGCTTTGATCAATCAGTGCAACGCGCATTGGGCCAAAGTCCATTTAACTTAGCAGGCTGGGCACTTCATTTAAGAATTGACCTTTGATCTCCTCCATGGTCAAAGTTTACTGGTAGACTATTAACCATCACCTGGGCAAAGTACTCTATAACATGGGCCATTCATGGCTTTATATCTATGTAC	300	Simulated_Annealing (G)	4.62161	0.0506667	0.170303
gosai_2239	CCCGTAGAAGCATTAGAGCGTAGCGTTACTAGCCATTCACCTGCTCTCATAAAACGCAGTGCAAGTTAATGAATAACCAAGATCGCTCCCACCTCACAACCCTTCATTGAGCAAACAGGACCATGTGTCCCATAAACTGTGATTTGTGCACATATGAGCCTATTGCCTAGTTAATAGTCAACCCAAGACCGTGATTTGCA	300	Simulated_Annealing (G)	5.53563	-0.163325	0.0176677
gosai_2270	ACATTGGACATTGCAGAGATTCACCTTTAGCAAGAGGCAAGACTCAACGATGGGTTTGAGCTAATCATTAACCCTTTGATTGTTTTGGCGGTTTGTGAAATATATAGATTGCCTGCCGGTCACCTAGTTAATGTTTACCTATAGCATCAGGAATTGGGTTGCCAATACTGTGATTTACGACGGCAAGACTGCATTCGAGT	300	Simulated_Annealing (G)	5.12674	-0.206297	-0.0330149
gosai_3834	TCCACAGAGCCGTCCAGTCGATCAGGTGATAGACGTGTATCTGATGCCGGCGAAATTAGGTCTACAGCGCATCGAAGTTAATGATTAACCAGAGATTTCACGCAATCACTGTCCATCACTCTATGCTTGAAGGTGGCGAAGAGCATCCAGTTCAATGATTAACCTAGACGTCAGTTGGGTCTTTGACGCGGTTCTCATGC	300	Simulated_Annealing (G)	4.68294	0.304196	0.271556
gosai_3363	TCAATAACTCCTTTCAATATTGATCTTTTGATGATCGAGAGGACCTTGATCTCTCCCCGGCCGTGAACGCGACATTCGACAGGTGGTACCACACGATAGATTGATATGAGTCTCGACGTAAACAGTTAATCATTAACTCAGGTGTTCTAAATCAGTGCTGCTCGGTGAACTCTATCCTTCAGCAAAGTCACACAACTAGG	300	Simulated_Annealing (G)	4.66643	0.183569	0.0351816
gosai_2960	CATCTTAACCATCCACCAGCTGCATCGGGTAATGATTAACGAGGTACCATGTCGGCACCGCGATGCCCATGCACCTGATGGACCGGTTTTGCCGGGAGCGCTATTGCATGTACGACACATATGTCTTGAATGTCGTAAGCAGTTAATTATTAACCTTTAGTAAACGGCTTAGGGCATGGTCCTGGGCACAGCATCTCTAT	300	Simulated_Annealing (G)	3.55683	-0.175219	0.369244
gosai_3781	GGTCCAAGGTTCAGGCCCCAGTCAATAATGCAATCACGGGTTGCTTGTTAGGTACAGAGGTCTTTGATCAATCACTGCAATTAACATTCTGCCCAAAGATTTATCTCACCTTTGGACTTAGACCGGTGCTCACTGGGTGCAGAGTACAACCACGCTGGTGCCCAGTCAACGGATGGCTTAAAGCACAAACGAAATATTGA	300	Simulated_Annealing (G)	3.53881	-0.0601571	0.246633
gosai_3749	ACTTGTTGGACCAAAGGTCAGTATTGATTGCATAACGCCAGACATTTAGTGGTCGAAATCTCAGCAAGATCAAAGAGCGCATTCTATAATGCTTAACTAAATTACGCAATGGAAGAAACTCAATCACCACATGACGCTACATCAGGTGAACAAAGTCCCATCGCACTGCCATTTGCCATGTGTTTGCGTACACCTGTGCC	300	Simulated_Annealing (G)	3.31869	0.0522168	0.243696
gosai_3211	TCCATTGGGATTGGCACGAGCTGCTTTCAGCCCGAGCTGCGTCCTGCCAGGCTACGCCACTTGGTTAATAATTAACTAGGCTCCATATCAAATAGATTGACGTATTGACTTAGTTGAGGATCGTAACCTTCACAGATTGGTCGTCAGAAGATGCCCAGGACGGCACGGATATACATCAGGTGTTTGGCCGACTTGAGTAT	300	Simulated_Annealing (G)	3.47865	0.0627673	0.244807
gosai_724	AGCGGTTTTGTCAATGAATAATCAGTTCAAAGTTCACTGATTGCAACACCGTGATTACTGCTGAAATAAAACCCTGCCCTTCTCGCCTATTATGCTGGATGGTCCAAGGTTTGCTATCTACGTTCAAAGTCCGTTTCAGTCTAGATGCATGTGCTATAGTACAGGTGTTCCGACGATGTCACCTATGATATCAAGTAGGG	300	Simulated_Annealing (G)	4.30451	0.0948166	0.253392
gosai_1106	TTCGAGCTGCCAGGCACGAAAACCAGTTTCGTGAAGCATTGGTGGTATGTCGAGTGTTTGCCTAGGTTAATAATGAGTAATAGAAATCGGTGAGGTCACCTGTACCGTTGTGGAAATTACGCAAGCCTCATCCCGTAGCAGGTAAACAATCGGTGTTTGTGTAAAGGGCTCTGTCGCGTACGGGCATCGCTGGCACGGCG	300	Simulated_Annealing (G)	3.61284	0.142308	0.568511
gosai_1425	CCCAGGTACGTAAGGTGAAATTTACCGCCAAAGCGATCGTCGAGATGCCCAGTCATCTACGCAGCATGCATTGTGGAAGAACAACAGCACCAGAAGTTAATCATTAACCATTGGCAATTGTCCTACCCTACTAGTCAGGCGCCCAAGTGAGAACACACTGAATCATGGCGGGCAGGTGTCATGCAACACAGAGATTTATT	300	Simulated_Annealing (G)	4.30831	0.128324	0.110824
gosai_297	TAACCTAAAGAGGTCTACGTACCTTGAGATGTGTCTCACTGGATCCACCTGTTAGGTTAATCATTAACCTGGCAGTCGTCCTATCCTCTCAGTCTTGGCGGTATTGGCTAGGTGTTTTGCCTTTGTAGTGGTCCTGATTTAGCGGCCAGGAATGTCCGGGATTTGCAATCAGGACTTTGTTCCCAGATGCAGGTGTGTAT	300	Simulated_Annealing (G)	4.28263	0.125085	0.0904067
gosai_615	CCCAAAATCACGTAGTGTCCAGATTGCCTATAATCACAACTCCGCATTGCGCATTGTCTCTGACGACCTTTGGCGCCGTGGGACACAGGTATCATGAGCGAAGGTCCAAAGTCCGCGCTTTGACAGTCCAGGACCCATTGTGTAATGATCAAAGGTGGCTTTGTACTTATCAAGACAGAGTTAGTAATCATGCCAGTTAT	300	Simulated_Annealing (G)	4.35578	0.373638	0.433506
gosai_1219	GCATCGGTTGAGTCGAACTTCAGGTACCTAGCGCCGCCAGTGCCCGTTCGGCTCCTCACGTCGAACCGTGATTCAATCACAAATCAGTGATGACCCCAGACGGTGAAGAGATTGGATGTAGCACCCAATGAAGCTTCCCATCAAGTTAATTATTAACCAGTGTCAGGCAAACATTCAGTCAAAGTGTGTAGAACCATCTG	300	Simulated_Annealing (G)	3.94408	0.000627118	0.257749
gosai_1872	CGTAGCTAGAGGCTTCACGGCCGCCGCAGGTGCATAGGGCTGGCCATGGCTAATCTGTGACCCGGTCTGCCGGTATCCAATAATGGTCGGTAGGCTCTGCACCGCATGTCGCCGGAGACATTGGGGTCCAAAGTTCCCTTAGAGAACGATGTCAACAATGGCATTCCTTTGATCAGTGATCAAAGGCCCTATTGTTCCCT	300	Simulated_Annealing (G)	3.6716	0.141425	0.111044
gosai_2140	TCGACAGGTGTACTTCTACCGGTAGCTGAACTTGGCGATGACTGAGGACTTTGATGTCAACAACGAGGTACAAAGGGCATTGTTCCGAACTTTAGACCTTATACGGCATCGACACGGCATGACACAGAGGCCTTTGATAATCAGTGGCTTTGATTTTTTGAGGTCATCAATGCTGCTGCAGGTGCAACAGTGGTATGTCC	300	Simulated_Annealing (G)	4.005	0.118197	0.109171
gosai_1294	TCGTAGTAAATCTGTTCGCGCTGACCTTGACGCCTGTCGGAGTTCAGCGCGCTGGACAAACTAATGACAATAAATCTGGCCCAGCAGGTGGCCACTCAAATCGTCGCGATGGCCACCCCGCCATGGACTTTGCACCCTGCTTGCTAATTTTGCCCTACATAAATATTGACAGACCCAATATACCGCCTAGTCAATAATTA	300	Simulated_Annealing (G)	4.26696	0.33871	0.184358
gosai_626	ATGACACACTTATCAGGAATCACGGTCGCTTTGATTCAATCTCTCCACCCTCAGGTGGTTAATCATTATCCGCAAGATATCGATGGGACCGGACATGCTTAACTATTAGGGCACAGATAGTTGCATAGTGATATTAGCCACTCGATCGCCAGGTCAAAGTCCACAACCCAGGCGCTTTGATACACCTGCATTAATGGCAA	300	Simulated_Annealing (G)	3.80525	0.180469	0.247476
gosai_1277	GCGCGAACTATGAGGTGCCTTGGTCCAAAGTCCGCGGCACTACCTGTAAATCTCAGCAAATCTAGACTGACACATAGTTCCCCACTTGGCGGTTCAATGAGACAGCATCAATATTTGACAACCAAGTGGCTCAAACACTGAGTTACCCATCATAACCATATGAACATCAAAAGGTTATAGTTAATCATTAATGGGATGCG	300	Simulated_Annealing (G)	3.15013	-0.0476461	-0.833011
gosai_613	CGCAACTGGTTAATGGTTAATCAAACAGAGCCGTGATTGCAGCATGCTGACCTGAGATGAGCTCCATTGATAAGCCCAATGGTTGGGCCACCTTCTTCATAATTGACTGTTGGCATTAGTCAAGTAACAGGTCTGATTGTTTCCGGCATCTCGGCTTTGGGCAAATATTGACATAGGTGTGCATCCGGTCGAGGGTTTCT	300	Simulated_Annealing (G)	3.79695	0.235598	0.233561
gosai_1686	CCTTGGACTACGGTTTAGTTAATGTTCAACCACTTCCAACGCCCCGAGTCATTCAATCACTCTTAGTCAATAACCACAAGCAAACATTACATTAATCACTAACCCATGGGAATACCACACAAACATTGGCCTCCCATTATTTACCTTGCTTATGCCCTCTGGAATGCTGCATCAGTCTTTCTTGCCCATACAATGCCAAT	300	Simulated_Annealing (G)	5.23778	-0.173348	-0.190999
gosai_2192	TGATTTCATTTGACGGGCGCGCCAACATAACGGATGTTTACACATTATTCTAAGATCAATGGAGCCTTTGTTGGCCTGGGGGCTTTGTTCTTGTCAACCGCTTATGTTTACCACGGGGTCACCTGAGTCCAAAGGTAAGCGCTTGGCTTAATCACTTAATGGCAGGTGAGCACGGGCACCTTAATATCGGACGAGAGGAC	300	Simulated_Annealing (G)	1.93856	0.100413	-0.599403
gosai_763	AAAGACCAAAGTCCAAAGTCCATTCCAATGATTTGACAACCTTGCCACCACGTCCGTCCAAAGGCCAGTTAACCGACGCAGTCCTTGATCAAAGTCCATCGGCCAGGCTACTACGTCCAATTGCGCACGGACGGCTTTGATTTGTTCTGCCAAGATAACCTGACCATCTTACAGGTATATGGATACCTGCCTTTACATAT	300	Simulated_Annealing (G)	2.62903	0.174013	0.220403
gosai_3241	GCTTGCTGTGAAATCACGGTCATATCATCATTCATGGAACCAAGTCTGAGTCCAAAGTCCAACTTGAATCAAAGCATATCAGAGAGTTGGGTACAATACACTTAGTAACCTAATCTTCTAGGCTATATACCCCTATTCATTTATTGGTTTTGCCTGGTTCAATGGTCATCTCCGTAAAAATCAGTTCAAAGATCAAAGCT	300	Simulated_Annealing (G)	2.25766	-0.00262507	-0.192967
gosai_2442	TCGACGATTATAACCACCGACAGGTGTCCATCTCAGTAGGTCGCTAAGCATACCCTGTGCCCGGACTACCATTCTGAGTTTTTGGGGTCAAAGTCCGACCTTAGGCCCGTTGATCTTGCTTCTGTTTAAATCACGGCCAATGTCCTCCTAGTCCAAAGTTCACTGGCATTGCTCCTATGTATTCCAAACAGTAGTCCTGG	300	Simulated_Annealing (G)	3.53277	0.147882	0.0382986
gosai_144	TGACAATGGTCGCCTTTTGTCAAACTGACCGCGATTGCATAATAGTCGAAGGACGCGTTTCACAGGGTATTCCGCGACGTGCCCCCGGGGACTTTAATCATCCCCCATACGTCGACTGTGTTCCCTGTCAATTTCTAGTTAATGATTAACTAATTCGGGGCGTGTGGCACTACAATTGATGCTAGACGAAGGTCGGATGC	300	Simulated_Annealing (G)	2.86207	-0.0246834	0.291919
gosai_1274	GGACCGACGGAGCTCACCGGCCAATGTCATGCCACCTGGCATTGATGGGATAGACGTGCTCCTACTCGTGTGCGACCGCGGGAAACAACAAAGGGTAATGTCACTATTTGCCTAACGACCGAGTCTTTGATCGCTCCATTGTGTAATCACACCTTGCAATCTTTGATCTGGTCGGCGTCGTCGCGGGCAATCATAGCTCC	300	Simulated_Annealing (G)	2.87505	0.191426	0.393899
gosai_3625	TCATTGTTGGAATAGGACTTTGGACCACTGTAGCTCGGGAACTGATGCCCTTTGTACCTACGGCCGATAATGGCACGGTCCGGGTTGCGCAACAGTTTGTCAAGCCATTCCAACATGCGAAGAGTACACAGACAGGTACCATACAAACACACCTATTGTCTAAGGTATGTGCATACCGTATGAAATCAGGACCGCGCGCT	300	Simulated_Annealing (G)	2.72712	0.249152	0.0925554
gosai_325	TAGCATGGCATGTATGACCTTTGGACCGGTGACACAGCTGTGATTACCGGTTTAAGTATGCAATCACAGATTCAGCAGGGCACACTTTGGTCTTTGATGTCATGTCCAATGTCATAGATTGGTCTCGGAGACTAATCAAATAATTGCTTTCACTGAGTGACCTGCCCCTCCGGTCCGTCGGTGATTCAGGTGCCCTTGAT	300	Simulated_Annealing (G)	2.72214	-0.162801	-0.315272
gosai_1110	AGTTGGCAGTATTGACATAGTGGACTTTGGACCGAGTGTTCGGATACCCATCGTAAACATACCAGGGCCGCTTCCGACACGTTGCACCCCCTATGCCCCGCTAACGGAACACCACAGGAAGGAGGTTCCCCCCATGCAATACCTTTTATCATGCCAGCCTTTTGGCGTTACCTGCACTTTGAACCCGGCCAGATCGTTCA	300	Simulated_Annealing (G)	3.49428	0.0531476	0.0482826
gosai_3874	GGCTATTGTAAGGTGGCAACCGATGTTGGGATAGCCACCACCAGACGTGAAAAATTACAGGCTGCTAAAGATTACACATCTGGTTAATTATTAACCTATAAAGTTCAAATCTCAGCGACTAGGCTTCTAGCCATTGAGCGACAATCTGTTGCTCCCTCACGAATAGGGGAATTGGCGCCAGTGATGCTCAAAGACCCTTG	300	Simulated_Annealing (G)	2.63648	-0.229989	-0.183225
gosai_3878	CATATGCGACGTGCGCAGGTATCTATTCAGAAATCTGAATCACTGCTTTGAACTTTGGACTTCGAGACCGCTCGCAGGCAGGTGTCGAACGTTGGACCTTAGCCCCATGGCTCTGTTTATGGGACAAAGGCGTATGTATGCACATCTTCCACTTTTTGCTCACCTTGCACCATGATGCTATCGAGGACTAGTGGACTTTG	300	Simulated_Annealing (G)	2.88057	0.324278	0.216199
gosai_1554	CCTCGTGGCTCCGGTGAGAATGAGAGATGCCAGTTTGACGGGTTGCGGTAATGGATCTTTCCCAATGGCATCAGTGGTTAAATACGTGCACCCCCCCATCTGGTTATTGATTAAAACTCAAGCACACATAGTCTTTGATCAGAGTCCACAGCCAGGGCAATGTTGGCATTTCCCGCCGCCCTTTGACGTTTCGTGCAGGG	300	Simulated_Annealing (G)	2.10042	0.127523	0.287375
gosai_2371	AGAGCGAATTGGGCGGTAGTTAGCGCGCCAGTTATCTCTAGATTCTGAGATTGTATTGATGTCAGGATGTCTGAAGTGGACTTTGTACCCACCAGTCAACAGATGCAAGATAGTCATCCCGCAGGAAAATCACAGTCATCAATGGCCCCATTGTGTAACCCCGATCAATGAGACGCAGGTGATGGAGCATTATTCAATCC	300	Simulated_Annealing (G)	1.41254	0.0467298	0.03498
gosai_1584	ACGGCAACTTAGACTTTGGACTCTTTGGTGAATGGAGTATAAAGCGTCCTATGTCAATAGCATCCATGCAAGGGCAAAGTCCACCCCAAGTCATTACTGGCTTGCCACCCCGTATGCCCTCACAATTGGGGCCAACAATGAGTGCTTGTCATCCAGAAGGGTATTGTTTGCCCAGCGCGGTTATGGAAAATTCCTATTGG	300	Simulated_Annealing (G)	3.23021	-0.132049	0.40674
gosai_1158	CCTCAGGTGATCGCGTGGTATAGCGGGGAACATAGTCTGCGATTCATTGGTATGGTCATGCAAGTCATTGGTCTGCTACCGAATACCCCTGGTTAATTAGCAACCGGTATCTTTGATCGGTGGGTGTGCAGATATCAGGGGCAACAAAGGCTCTTTGTGTCACAGGTGAGTCAATAGATGTTCGCTATTCACCTGTAAAT	300	Simulated_Annealing (G)	3.18658	0.14981	0.010516
gosai_1416	AGTGATAAGCGCCAAAGGCAACGGTTTTTGGTGCACCTTGCAGTGATTGATTACTGCCCATAACAACGATTAGAGATGGTGGCCTTGAGTGCAAAGTCCACTGGTCATCCAACCCACGGGAGGACAGGTATTAGTCAACAGTGAGACATCAAAGTCCATTCAGAGGTCCAGATTGATTTGGCCGACACGCTGCGCACCTG	300	Simulated_Annealing (G)	3.03763	0.209786	-0.177615
gosai_1039	TAAACCCACCTGCATCGAGGTACCAATTCGAGCATTGTCCCAATCACTGATGGGAGTGTATTTAGGATTCATTGGTGCCAGCAGATGCGGTTCCTACGACGAATAGGCGCGTCTTATTAGTTGGGTATTGATCGGCGTTAACAGGTTAATCATTAACGCATCCTTTGTGGGCCCATGGTATGCCCTTACAGAGCCCTTGG	300	Simulated_Annealing (G)	1.50509	0.13021	-0.0471598
gosai_176	AATCGACAACCTCAAAGCAGGTATAGCCGAATTGTTGCCAGGCACAATGTATCGGCGCCCTTTGATCTGTACTTGCGCTACACAGTCCAAAGTCCACCTGATGCGGCTGGAACCACAACTGTGATTGAGGAATTATGTCAACATACCTTGATTTAGTACTTGAATGGATATCATGGGCGTAACGATGGACTTTGCACCTG	300	Simulated_Annealing (G)	3.32881	0.164156	-0.0820654
gosai_2331	TCGCTAAGTCTCGACCGCAACCTGTTTGATCACCTGCCCGCGTGTGAAAACTAACGACCTGCCATCAAGTTAATCAATAACTAGCCCACAACGTCGTCACTCGGGCAAATCAAACATGCAAAGAAATCATAGCGTAGAAAGAGGCTGGTTGCGCAATACGGATTGATGAATGCAACACACCATGGGCACTGTGCCCTTGG	300	Simulated_Annealing (G)	2.17075	0.182278	0.44883
gosai_2850	TGATTTAGTTTTGAACTTTGGCAACTACGAGAGTGACACATAAGGTAATTGACGCCAACGGCAAAATCAGCTCACAATAGCTCCCTTCGATGAGTTCAAAGTCCACTAGTTGCCCAGATTTCATGCGCTGTCAGGTGGCGACGCCAAGGGTCAAAGTCCGTTTAGGACCGTGCAGGTGCATTAATGGTCCATCGGAACTG	300	Simulated_Annealing (G)	3.06439	0.310189	-0.00680521
gosai_1100	TTGCGTTGCATACTCTGTGCGGTGCACTCAAAGATTGTCGCTTACTTGACCAAGCAAAGATTACACAACCAGGACAAAGAGTTTAGTATGTAAGCAATCTGTTACCAGATCGGGTGATGGACTCGCTGATGACCTTGACTCCACCTGATGTACCAAATTTTCAATCAGTGCCATGGGTCAAAGTCCACATAGTACGTTAA	300	Simulated_Annealing (G)	1.94	0.11784	-0.118332
gosai_1414	CCTTCGACGGTCGATGTGCAGCATCGTTCTTCAGGTAACCACTCTCCGGTACCTTTAGTCACTGCCGTGACATGCACGGACATTCTTACCGCGTTCAGCCAGAATCAAAGATTCTTTGTTCTACTGGACCTTTGCCCCCCAGACGGGCCCATGTAGTTATGAGTAGACAATGCCAACACATGGACTTTGCCCTTTGAACG	300	Simulated_Annealing (G)	3.24768	0.000421459	0.162197
gosai_195	CACCTGTCCAGGTCTTACTGGTGAACAGGTGTGGCCAAGGTTAATGATTAACCAGATAGGTATGCCGTGATTTGCTTAAACATCCTCTGGTGACCGTAGTTGATAGTATCAGGTAGATGACCTCTATACCTGTGCCGTCGTACACCTGCAATCACTGCAGGCCACACAGAGACATAGACGGCACCAAGAGACTAACCAAG	300	Simulated_Annealing (G)	2.07547	0.0198333	-0.822678
gosai_1114	TCGGGTCGGATTCACCATCCTTATCACGGCAGCTCAATGAACAGTCATTGATGAATTGAGAAATCTTTGCACTTGACCATCCCGCCCATCATAGTCCAAAGTCCAGATGGATGGCCACATTTGTTCAATCCCCAAATGGGCCATAACAGGTAGACTCACCGGACTTTGGACCGTCAACCAGGATCAGGATAAATCACGGG	300	Simulated_Annealing (G)	1.59776	0.230225	0.123925
gosai_1094	ACATCATTAGGCGTCGCAAACAGGTGTGATTAGCACTTGCGGGCACACACCTGTTCGCCGTTTACCTTGTTGACCGAAGCAGAGATTTAAGGGGGCTTCTTCAATCACGTCCCGGCAACGTCCTAATCATTTCGCAATATTTGCTTACTGGCGTTTCTCAACTCTTTGATCTATGATTCATTTGTGGAACTTTGGTCCAG	300	Simulated_Annealing (G)	1.62656	0.266301	0.0162536
gosai_3956	TACAACGATGATTCAATCGGTGCAAAGGTCGCAGTTCTAGAATACACCTCGTGAGGAAATCTGGTTCGCATTCACAGCTGATGTTTGCGTATGTCATTTCCAGGGCAATATAATAGATACGGGCTCCTGCCCAGGTGTGTGACACAAAGTGTCTTTATTTGCTCTATTATGTAACCATCGTCCAACCTATACATGATGGG	300	Simulated_Annealing (G)	2.81654	0.0590092	-0.156525
gosai_3457	CTTGTTGGCCTTTGAACCTGAAGGCAGCGTAAACTTTGCATCGATCAAAGGGTCCGCCGCACTCAGTGGACTTTGTTATCGCTCGGTTCAAGGGTCATTATTTGTGACCCGATATTGGAACTGTCAGATTTGTGCGGGACTGTGATTGTAACCGCTGACCATGGCGTGGTAGGCGCGGTTTGGGCAGGTGTGCATGGTGC	300	Simulated_Annealing (G)	1.8029	0.18162	-0.194058
gosai_943	GGCTATTGGGTCGGTAGGACGCAGAGCGCAACCTCAATCACTGCATGACATAGTCACGATGGTCATGCAATCACAGTTCAAAGTCCAAACCTGGGATTTCGGGCTATTCATCACATCCCATAGTACTTCATCACCAGGACTTACTAAATATTGGCTCTTGACCAGCTCATCAACCAATGCCCCCAAATGAGGTCAAGGTC	300	Simulated_Annealing (G)	1.38574	0.136246	-0.0516787
gosai_3526	TGCCACACGCAGGTGCACCTGTGAAGGGTCATGCGAATTGTGGTTCTATACGCCTTGGTGACCTGGATTAAAGGGACCCTTTGTGAGTCGCTCATGCCGTGATTTAGGGAGGGAATCACATCCGCTCTATCAAGCCCTTGGTTAATGATTAATGGAATACCAACCCGTCCAGAACCGTTATGTATTAAGTAAGGGAGCAT	300	Simulated_Annealing (G)	4.94743	-0.271079	-0.0103482
gosai_1917	CCACCTGCACCTGCCGTTTAGTAGCATTCCCTACAGGGGCAGATCTGTGATTTCCGAAGCCCACTTTCACGTACCGAAGTTAATCATTAACCCGTTTCAATGGGATTAGGCTAAACAGTGTGGCTCATTCAATCTTTGTTGGTATTACATCTGTGGGCCAAAGTTCCACCAAAGACGGCTTTGATTTAGTACATCTATTG	300	Simulated_Annealing (G)	4.94321	-0.299274	-0.214199
gosai_3139	CTCTATGTGGGTTAATCATTAACTAATACGGAAGGTCAATCTCGTCTAGGTTGCATCAGGTATACATTGCAGGTTACAATGCATTCGTAATTCCTGGTGGTGTAATCTGCGCCATATGCAGGTATATTATGCCATTGTGTAACGCCTTGGATCCTCATCAATAGGGACATTGTGTTGAGGTTTGTGATGGTAAGCCTGGG	300	Simulated_Annealing (G)	1.59491	-0.128884	-0.0556469
gosai_3188	ACGACCGTGTGGGACTATCGTTGGTAGCTACCAGGTTAATGATTGATTCAATCTGTGTGTTGTGATTAATCATGGGTTAAACTTTAACCGAGTCGGTATACGCCCGATCTTCTAACTATGATGGTTACCCCAAATCTATGCCTCATGTGCCAGAACCAGGGGGGCAACTGATCATCGCGCACAACGTTGGAACACCTGAC	300	Simulated_Annealing (G)	4.61692	-0.0185694	0.0272296
gosai_12703	TTAGAGATGTGCCCAATGCCCGATGTGTGTGCCTGGCATCTTTCCCGCCTATGAATCAGTTGCAAAGTCCACCAGCATATCAGACGGGCAAGCCAGTGTTTGCCAATCTGATGACTAACGGTCCAAAGTCCGTAGTCTGCACAGGTTTATGTAATGCCCCATTACACATTGCACAGGTATGCATCCTACACCTGTATTGA	300	AdaLead (G)	4.81382	0.296593	0.684598
gosai_15059	CCAGCCGTCGAATCGACAGGTGTGATGCCAACCATCGTAGCCTGGCATTTGCGGTTCTATTAATCATTATCAATCACAGCACCCCCCTCGGTCCAAAGTCCACTTAACCCCCAATCTCGACCTTTGATTTCTCTTATCCCGCTCACCTTGGCTAATCATTAACCCTAAGCCAATATATTTGCCCTGATACATGCAATGCC	300	AdaLead (G)	4.84441	0.246926	0.193304
gosai_14063	GCAGGTAATGCCAGGTGGGCTGTGCCATGCTGCGATACCAGGCTAGTTGCTCCCTAGCCAACTAATGGTTAGGGCATCCAGGGATTGGAATGCTGGACGGGCCAAAGTTCATTCTAGTGGACTTTGGACCGCTACCCATGGTTGTTTACCTAGATGCGTCACAGGTGCCTGGCATGTTGACCTTGGGACCTGGCAACGGG	300	AdaLead (G)	4.91701	0.437569	0.369841
gosai_13431	TGATCCATGAGGATGGCTTTGTACCCTGTAGCGATGTGGTGGACCTTGATCTCTGGACCGGTTGACGATGGAATGCCCGGAATGCGGTCAGCCCTTGTTTGCTTTAGCACACCTTATGTAAGCTCTATTGTGCAATTGCCCAATGTCCACTATTCAAGTTGGCACAAGGGCAATGCCCAGGTTGCATGGTCCAAGCTTGG	300	AdaLead (G)	4.537	0.243944	0.465459
gosai_13614	TGCAATATGGTTCTGCATGCCAGGCTATGATGCAGTGATTTGGTGTACGTTACCTCTCCTGATAAGTCAACACGAGTAGATAGCTTGCATAGCTTCTAAATCACTGCTCACCTGTCAATACCTGCTTGGTTAAACATTAGGTGATTCCTTTGGTATGAGTCATGCCAACACACAATGACACCTTTGTGTGCCCCTGTTGA	300	AdaLead (G)	4.79218	0.0161783	-0.0541244
gosai_14963	CAGGTGGTGAACCTCGACGGCACAGGTAACTTTGTGTCGCAACAGGCACAGCTGGCACATCAATGCCCCTATTGTTCCTGTTGTCTACCTACCGAACTTTGGACCCAGATAACCAAACAGAACAGATAGTAATCTTCTATGGGTGATTTGCACTTTGGTCCTCAATGAATAACCATAGCAAATATTGACTCTGATTAAAT	300	AdaLead (G)	4.80214	0.295974	0.189932
gosai_13106	AGCATCTCTGGCAGGTGCATCAGTCGGCAACGCTAATCTCAGGTGATGCTGAAAGCTAGTACCATCCTACCTGCGCTACTGTACTAAGGGGTGCCACCTATGATGACACCGGCCCGGCATTCCAGAAGAATGCATCATCCTGGGTACAAAGGTTGACTTTGTGTCACTGAATGGTATGCCCGGGTGGGTAAACATTAACC	300	AdaLead (G)	5.76263	0.0943889	1.11915
gosai_13854	TAGCCTCAGGTGCACAATGGCTCATTGATGTCAAGGTGAGCTAATAGATCCGGCTGCCAGAGGGCACACCTGTAGCTAATGATTAACCTGGCCGTCAGGGTCAATGATTAAGCTAGGCAGGTGTCCCAATCTATGCAGTGAATTGCCGTGATTTACTCCCTTGTGCAACGCCCGTCAATGATGGTCAAAGTCCAAAGCAT	300	AdaLead (G)	5.40117	0.156588	-0.0176946
gosai_14025	TTAAATCACGTGCCACCACTCGATGCTTATCAGCGCGGTAATGAGCCAACAGGTGTTAATGATTACCTGAGCCACTGTGAGTATAGGCGTTCTGGTTGGCATCCTTGGTTAATGGTTAGCCTGGCATAGTACACATACTGGTGGACTTTGAGCAGTGATTGCAGAGATATGTAATACCTGTCAGGGCTTTGATTTCTATA	300	AdaLead (G)	5.37551	0.0210869	-0.172733
gosai_14694	GTGGCACAGATTTCACACCGGTGACTCAGCATTGGCCGAAAGGGTTCAAAGTCCACTGGCACACGCACTTTGGCACACCCAACAGTGATTACCTGTCATGAGATTGTGTAATGGTCCCATACGGCCCTCAATGTAGTCTAGTCAATGGTTAACCCAAACAAGGTGTTGGCATGCAGGTGCCTACCAGGTGGCACAGTTGG	300	AdaLead (G)	4.39314	0.42567	0.440617
gosai_12810	CGACGGGCATCCATTCTAGTTTGCCACCCTTAGCATCCTTAGACGTTTATTGCTCCATGGTGGACTTTGGACCCTGGTGTTTCAATCACGCTTTGTCCCCATCCCATTAATCATTAACAGGTATCTTGAGGGCAAAGTCCTTTTAAATCAATCAGTACTGAGTCAATCTCAGTTGGTGCTATCAGTACACCTGTCTAGGG	300	AdaLead (G)	4.67042	0.205639	0.0437613
gosai_13937	CGACGGACGATACCGGTGCAACAGGTGCACCGGGCACACTTCCGACGGCTTGTCAATGATTAATCGACAGCCCATGACTCATTGTGTAATCACTGCTTGGGAATAGTTAATCATTAACTCATCCTAGTACACCTATCTAAACCACATCATACAATGAATCACGGCTCCTCAGTTAGTACCGTTATACAGGTGTCCGTCCT	300	AdaLead (G)	5.39917	0.38567	0.193492
gosai_14345	GAGTGGGTACCCCTATCTAACGGATGCCACGACGCCAACCTGGCACGCACATCAGCACCCCGAGTATGACATTGGGCAAACATAGTGCCAGGACTTTGATCTCTTAATCAACACCTGTACCTAGTCAATGATTACCCCTTTGATCGCTCGCTACCACGCTCATGTGCCCAGTACAAAGTCCATTTATGCCCCTTGGCATC	300	AdaLead (G)	4.40338	0.173869	0.177522
gosai_12496	CGCGACGGCGCCACAGGTGATTAGGTGAGAAATCACGGCAGCGGACGTGCTGCATCCCTGAGATTGCATATAGCAACTATTGATGATGGGTATAGGGGCAAAGTGCGCTCCTATATAACCAGACTTTGATCCAAGATGAGTCACGCGCCCAAGGTAAATACCAAACACATTACGCAGGTGCATGTGGCACTGATTGCCGC	300	AdaLead (G)	4.33755	0.485295	0.515188
gosai_14168	TACCTTGGACATGAGGTCATGCCCTGGCATCCAGTTAATCATTACAGGTGCACCTTAGGCATGCTGTCATCCCTTGAGTCAATATTTGCTTTGGCAGGTGAACTAGACTGAGATTTGTGGGAGGCGTGGAATTTTCCGGCCCTCTACGGCTGCGCTAGGTCAAACAATAAATCACTGCCACCTGTTGCAAAGTGTGCCAA	300	AdaLead (G)	4.33751	0.126575	0.168494
gosai_14573	ATGCCCATCACAGCATGCCCACCTGCATCCTGGCAGCAGGCAGGTGGCGGGGTGACCTTGTGCAGGTTGGTGTCAACTCATCCACTCACATTCCCAAAGTACAAAGCACCACTCTATTGTTCAGTTATGTTTACGCATTCCACTTAGATCAAAGCCCTGGCACAATGACCTTCGGACTTCCGGCGGCAGGTGTAGATGGG	300	AdaLead (G)	4.42028	0.0237392	-0.0194787
gosai_14181	TGCCAGGTCAGGTGGTAGCGTGCCCGTCGAGCAGCGGTTGGCACAAGCGACCTTTGATCCCTCCCGGTCGACATACGCTCCCAAATCAGTAAATAGTAAATGATTCACCCAAGTAGGGTGTCCCTTTGATCATCCTTTGACACATACCTATACAACAAGGTGCCAAAGTCCGTATGCCTGGCACTGTTTGCCAATGGGCA	300	AdaLead (G)	5.41435	0.469962	0.248631
gosai_12399	GGTCAAGGTTGGCATCACCTGCGCAGGTAGATGCGTACGTGATGCCAACACAAATCACGGCCCCTTAACCAACAATGTGAGCCAAAGGTCCCTTGTATGGTGTCAGGTGTCGCCAAGGTGCCCTTTGATCCTACCTGAGTAAGCCTGAGATTGTGCAATGCCCCGGACAATGCCCCCTTTGTTTGTCCATGACGAGGGGT	300	AdaLead (G)	4.50054	0.253677	0.10027
gosai_15506	CAATCTCACAGGTATTTGGACTTTGGACGGCGCACACCTGTACCGTGCGTCTCCGCTGATAGTTCCGGCGGCTCTGGGGGTTGATAATTAACCACAGGCAGTGATTCATGTGTTTGGTCCCCTCAGTGATTTCCTAACAGTGAGCCTTTGTACCTTGACCGGGTACATCAATCACATATACTCACCTGTATGCCATCCAA	300	AdaLead (G)	5.57616	0.239565	0.125248
gosai_12854	CATAGGGCATACCCATTACCTGCCTGGCATATGCCCTATTGATGTACCCGACGGCTCAACAATCCCCGTACTGTGCATAGGTCAGTCAAGTTAATGATAAACCAGACCAAATCACGTCACCTGGTACAAAGTCGGTTAATTGTTAACTAGCCCTCATCCTATACTGATTTATCGACGGCCGGCCGGGCAGGTGCGATGTC	300	AdaLead (G)	5.63468	0.420119	0.35263
gosai_12887	CCCAGGGCAGGTGGCATCCTTGACGGGGCAGTGCCAAAGAGTCAACAAAAGGCACATCCAAAGTCCAGGGCAAACATCCGCACTAGGGGTCAAGTATGACCATGGTTGACATAATTGACGTTTCGGTCCAAAGTCCAAATCACTGCTGTGTTTACACAGTGATTCCACCTTCCAACGTACCAATGTCCAATGTAAGGTAT	300	AdaLead (G)	4.83871	0.319716	0.226317
gosai_15118	CTAGCAGTGCATCACCTGCGCAGGTGTGCATCACACCTAGGGCTAGGTAATACTTTATACGACGCCTCCAATCTTGGCCAGTCTGTTGGCATGGGGTCCAAAGTCCAGTTTGCCAAACAGCATGAATCACAGTGCAACTGCCTAGATTAGTTAATCATTAACCCCAGATAAGTGTCAAGCTGAGATTGCCCCGTCCAACC	300	AdaLead (G)	5.46877	0.520449	0.266145
gosai_15861	TCGCCTCGCCTGGTACAGGTAAACTAGCATGGCAGGTGCTGGAATTCTCCGATGACAGTCCTATCGCTACTGGACTTTGCCCCTTAGGTAAACGAATCCCGTAGTGGGCTGCCGTGATTTCATGCATTACCTAATCACAGAACTATGTGCAGGTGTTACGTTACTCCTATTTACCTTGACCTTGGGTGCATAGTCCAGCA	300	AdaLead (G)	5.5032	0.672411	0.384074
gosai_13998	TCTTGGTACCCCTGGATGCCAGGTGCAGCGCAAGTGATGCGCGCCTGGGTACCACACCCGCTATTCGGTATCATTGGTCCACAAACAGTTAGTTAATCATTAGCCTTGGTACATCTCAATGCAATGCCCACCGGGGCCAACTTCGAGGTGGGCAAACATTGGATGCCAGGTTAATAATTAACTATATGCAGGGATTTGAA	300	AdaLead (G)	3.95858	-0.390994	-0.126691
gosai_12112	TCGAGGATCCAAAGTCCAGTGAGATGCCCTCAAGATAAGCTAGGTCATGGCACACCCTTAGTAATGTGCAATGTTTGCTCATAGAATGGGCAACACAGATTGGGAAATCACAGCTTATCTTTGATCAAACAGTGGCCAAGGTCCAAAGGTGAGCTCACCGCAAGGTAGTTTCCTGCGTGTGTCATACTAATATGCAGGTG	300	AdaLead (G)	5.20254	0.460616	0.235867
gosai_12707	TCGAAGGTGTCAAGGTCATGGCACAGATTTAGTAACAGATTAACCCATGGGCATTGGACCAAAATCACAGCACTCCAATCAGTTAATCATTGACTAGCAGTAGGTGATAGGTCCTTGGCATCAGTGACAGGGCAAAGGTCGAGGCTATACAGGTAGGCATAGTCTCTAGTTAATCATTGATCACCTGCCCAAGGTACGCT	300	AdaLead (G)	5.48387	0.361384	-0.018717
gosai_13703	AAGGTCAGGTGTGCGCATTCGGAAATCTTCAATCAGGGCAGCGCATGGCCAACTAATCAAACATGAGCGTCATACCGTAAGAATCATGGGTCAAGGTTATGCACCACGGTTTAATAATTACCCAGTGACATAACGGACTTTGTACCTAGTGGGTTATCACACTTACCTGCCCATGCCAGGTGGCATGCACATCAGGTGCG	300	AdaLead (G)	5.15883	0.2082	-0.00629649
gosai_15785	TCGTCGATGCACAATCAGAGCATACAGTTCGCTTATTTATGCAGGTGTTGACTCAACAGTCTGACACAAATCACAGCAAGGCCTTCATACTCACCCAACAGGTCAAAGTCCATGGTTGCAAAAGAATCATAGGTCACACATTCCCCACGCAACAGGTGAATGATTAACTGCAACAGGTATGCAGGTATGCATGCCAGGTG	300	AdaLead (G)	5.20927	0.432243	0.164674
gosai_12617	GTGCCCAAAGATGCCAACGAATGCCAGGCGCCAAAGGGTGCTTTATCTACATGACGTGCCCTCCCTGGCATATGCCCTGGGTAGACCTTGGTCAATGATTAACTAAACTAGAGTTGGCAACACCAGGGAAGTCAATCATTAACCATGGGCCCAGGCAAATACCTTGCCCCCTGGCACATAGGTGAGTCCGAAGCAGGTGC	300	AdaLead (G)	5.17077	0.394887	0.148469
gosai_15001	GGATGCCAGGTGGCATCGCGATGCCGTGAGCAATCAGTGCGCTGCCCTGGCACCTGTGGGTCCAAAGTCTGATGCAACACAAGGGAATGCCCTGGGCATACACATAGTGCCCTTTGTTACCCATCATCATGATATCATTGGTACCTGGGTTAATCATTGACTAGGCTCCCAAAGGTAGATGAGTACATCCCTTACCTGTG	300	AdaLead (G)	4.15672	-0.016473	-0.0285717
gosai_12106	CAATCACTGCATGCAGGTGATTTAGGCGTCAAAGAAGGATGAGTCAACAGATTTGGTATGCAGGTGCATACTTCCTTGATGTTTGCACTGTGTGGCATGGACTTTGTACCCATTTGGCATTCCCCTGTCCCTAGACGGGCTGTTTGCATTGGTTACGAAATGCCACCTTATACATCAAAGTGGCATCACTGTCGAAGGTC	300	AdaLead (G)	5.26751	0.254734	-0.101606
gosai_12893	CCAGGCAGGTGTTGGCATCACCCTCGGGGTTAATGATTAATCCCATGGTAGTCACCCGTAACTGCAATCACGACCTTGCACTTTGGACCCGTTTAGCCATCGGTGTCCAAAGGTTGCACAAACACACTGTCAGCACGCAGGAAGGTATGCCCACTCTGTTTGAACAGGTGAGACAGTCTATGGCATAAGGTGTGAATGCC	300	AdaLead (G)	5.60305	0.58834	0.266669
gosai_14724	ACCTTACAGGTAGGTGCCACCTGTTTGCACCTGCCCATTGATCCACGCGCCAATCACGCATCAGTCCACCAAACTAATGACAAGGGTCAGGTCTAGTGATCCGCTGTGATTTAAGGTCAAAGTGCATCACAGGTGTAGCTAATGATTAACTCTTGGTCCTGAAATCACTGCCGACCTTTGGAATGTGTAGCCCTAATGCG	300	AdaLead (G)	5.55791	0.1543	-0.276456
gosai_13719	TTATCGCGCCGTCGAGATTTGTCAAGGTGGTCAAAGTTCACCTGTGTTAGTCACTGATTAACCAATCTGTGACACTCACTCGACGGGTCAATGTTTACCCAAATAAATAAGTCTTTGCAATAAAGTGTTGGGCAACACCAAAATGGTCCAAAGGTGACTAAGCGTGCCCATACAATGGAATCAAGGTGTGCAGGTAGTGC	300	AdaLead (G)	5.13815	0.178204	-0.0820523
gosai_12729	ACATGTACAGGTGCACGTTATGCAACCACAGCACTCCACTCTCCCCGATGGGTGACACATTGTTAATAAGTTACAAAACCAGTGCTGAGATTGCCAAAGGTCACCGTGATGTGATCAGGTAGTGCGTCACCTGCGGTCTGGGCCAGGTCAAGGTCAACAAGAGATGGCATAGACATGTCTATTGCACAACTGTGTTTGCC	300	AdaLead (G)	5.17263	0.718666	0.429614
gosai_13865	GCACAGGTGCACTAGCGTTAAGCGGCTTTGGACTTTGACCCCGGCAAATCACGGTCCACCTAGGGCAAATCCACTGAAATCAGGGTCAACAACCCCGCTGGTTGAGTTATGTCAATATTGACCCACCTGTGCCAACCATGGCATTCCATTGAGGGTACAAAGTCCAACTCTGTGTTGCATAACGGTGCCAATGCTGTTGG	300	AdaLead (G)	4.30437	0.190789	0.230902
gosai_13166	CCTCGACCTCGACGGAGTGGTCAGCTGTGATTTATGACACAGAGGTCCAAAGTTCCAGTGATTTACGCATACCTCAGGTGAGGTCAGGTGGTACCATTGATACCGTGCTAATCATTAACATTAGGAGTGGGCAATTAGTCAATGGAGAGTTGGACTTTGCCCTTGTTGCAGTGGTAGTCTACCTGTTGAGGACTTTGCCC	300	AdaLead (G)	5.14161	0.399445	0.129583
gosai_15646	TCGAAAATCACAGTAAATCTCAGTGCGAAACAGGTTAACGTATAACCTGTACCTGCCGTTGGACTTTGCACCTGTGGTCAAAGTCCAGCCCCGAAAGTCAATGATTACCTATAGGTGTGCCAGGCAGGTGATATCATGGGTTACACAATCTCAGTTAATCATTAATGCCCAATGGCGTGGCAATCCATCAGGTAGATGCA	300	AdaLead (G)	5.0044	0.557415	0.374085
gosai_12520	GCACCTTGGACCTTGAACCTGTACCTGTCGGTCTGGTCCCATTGAACAATCAATGCCCCATCAAATGGGCACAAGGCTTGATAGCCTACTATCAATCTGGTCAATGTGTGCATGAATCACAGTCTGTGTACAGATCGGTTCTATTCCATCAAGGTCCAAAGTTCGCACATCTTACATAATGTTTAACTACCTGAGTCGGG	300	AdaLead (G)	4.97708	-0.0235087	-0.150496
gosai_15664	CACCTGTTGGCATCATGTAGATGGGCATCCCTGCCAGCGATGCCAGGCTAACGGGCACTGAGTATTGACCTAGTCCATGCACCCACATCCTGGGCCTTTGATGCCAGGGTGACCTAATTGCCTTTGCCAACTTAGTTAATCATTAACTAGACCAAGTTCAGGGCAAAGTCCTTGGCATTACACAACCTTGACACCTGGCA	300	AdaLead (G)	4.44076	0.302641	0.129559
gosai_13702	GTGCGCACCTGTCCAAAGTGCAAAGTTCTACCAGGCTGATACGCGACTACCCATGCCAGGCGGGTGGGCAGATCAAAGGTCGAGGACATAGGGGTGAAACACATTAGGACTTTGGACTGGTATGTCAATAGGGGGTTGTTGACACTGGCATAATGCCCTTACGTAACCTGGGCACAAATGTTGGCATTAGCCTGGCACAC	300	AdaLead (G)	3.96741	0.306796	0.340007
gosai_15412	AGGTGTGAACCCGTCGAGCATCACCCGCCAGTGATGCCAATACCAGGATGCTCGACGTATCAAAGTCCAAAGCATGACGCGGTCAGGTCCAAAGTCCATCTACACAGGGTACATAGTTCACCTGTCTTTGCCAGTTAATGTTTAACCTGGTACCAGGTTGCGTACCTCTCGTATTGGGTGCCAGGGCATCACTAAGTGGG	300	AdaLead (G)	4.51326	0.199477	0.0106617
gosai_14284	TCGATGCGCGAATGCGATGACTCACCTAGCACCGTCGATAAATCACGGCATTGCACTACAGGTTTGCAAACACACCTTTGATTATAAAGTCCAAAGTCCATCATGATGCCACCTGTCACTAGGTGATCCTTTGATGGGCAGGGATCAAAGTTCGCTTTGGGTTGATCATTAACTCCATCAGTACCCAAGGTGGCATGGTC	300	AdaLead (G)	4.54943	0.275621	-0.0165745
gosai_12300	GGCGCATCCAACAGCAGTGATGCTACTAAGATGCACCTGTCCAGCGCTTCTGTCAATGATTAACCTCCTGGCACTCTAGCGAACTCTTTGATGGCACCTACTCTAGTTAATCATTACCCAGACCTATGACTGACCCCACAAGCACGGTACAAAGTCCAGTGTGCCCATAATGATTGAGTGCCAGCCTGGCATTGACCTGG	300	AdaLead (G)	5.34622	0.28923	-0.189222
gosai_12360	GCTCACCTTTGACGGCCGCCAATCTGTAAATCTGAGTCAGTCCGCTCAAATCATAGGAGTTACATAACCAAGGTCTTCATATCTATTGATCTCACCTGTGTTGACTCACCATCCTGGCAACACTATACCAAACATACAGGTATGCATGACTGGTGGCATGAGTGTAAAGTCCACATTGTTTGGCAATGCTGGGCAAAGTT	300	AdaLead (G)	4.33801	0.261781	0.101776
gosai_15248	CGCGCTCCAATCTCACCGGTCAAAGGGCACTTGATGCCAACTAGTTAATATTCAACCACTTTGAACTCAATGAAAGTCTATTGTAAGGTCAACAAGTTGTCAACGTCGAATAAAGTAGGCTTTGGTGACAAGGTCCAGATTGATCATTGAGGTGGTTAAACATTTACCCCCATGGTAGTGTCACCCAAGAAAAATCTGGG	300	AdaLead (G)	5.31184	0.00389158	-0.417838
gosai_14435	GTAAAGTTTCACACCTGCAGGTAGCGCGCCTCCCACAGAGATGGTTACTCATTAACGAATGACATGCACAGATTTACTATTAACCTGAGATTGCACAACACCTGATACAATCACATCATTTGTCTTGGATAGCCATGGACTTTGGACTTAAGTCAATAGATCAAAAAGAGCCCAATGCCCAAGGTGGGCAAACTATGCCC	300	AdaLead (G)	4.67178	0.103012	-0.105928
gosai_12472	CCATCGAGCAAATCACGTTATCCGACGGCTAGGGTAAAGTCTACTGTGGTCCTTAGCTAGTTAATCATCAATCACAGCCATTTGATGACCAGGTCCAAAGTCCAAAGGAATGCAAACAATGAGTACCCTTTGGTCTGTTGGCATAGGGTAGGTATCCTGCCCACCTTGCACACACCTTGCCGGTTATGCCAGGTAGTTGG	300	AdaLead (G)	5.26763	0.322513	-0.0923931
gosai_15341	GCAGGTGCATTACAGGTGAGATGTGTGCCAGGCCTGGCATCACTGGGTTATGTCATGGGCATTGAAGGCTAGTTAAAGATTGCCTTGTAAATATGTACCTAGGGGGACTTGCCGGGGCATCCTACAGTGTTGCACAGTGATTCAGTACTGGTACGTAACCCCATGCCCAGTGCCAAGGGTTAATCAATAACCAGGATGGG	300	AdaLead (G)	5.20774	-0.226104	-0.384495
gosai_13315	CAGGTAGTGCGGTGCCGTGATTTAAGCAACCAGGCATGCGTAGGATGAATCACAGCATACCTGTTTGCACACCTGCGCTATGTACATAAGTCCAATGGTCCAGATTGCAACAATGAGCCTTTTGTTGACACAACCTTGATGGCATGACCACAAGTCCAAAGTCCACATACCTGTCTATGATGCCTGGCATTACAGTACCC	300	AdaLead (G)	4.71611	0.353847	0.111422
gosai_12047	GGGTGCACAGGTGAGTCATTAGCATGCAGGTGCACTTTGATCTTCGACGGAATCTGTACCTTGTACAAACAAGATTAGTCACAAGGGCATTGCCCTGATTGTTTATCTACTTGAATGGTGAACTTTGCACTGGCACGGTAGGTGGCACTGACCTTTAGTACCAGGGCAAACATGCCCAGGGACGGGGTTACAGGTGGGCA	300	AdaLead (G)	4.66034	0.274849	-0.0843794
gosai_15618	CTATGCCATCATGCCCACCTTGATGCCAGGTGCCTGACGCACCATTTCCTGCACCTGTGCCAATGACCCAGCCTTAAGGTATGCACACTGTTTGCTTGACATCAAAGACAATCACGGTCAGGTGCTTTCCACCCAGTGACTGGGACAATGAGTGCATTGTGTAACAGGGTAAATATGTGCACCTTGCGGTGATGGGCACG	300	AdaLead (G)	3.55986	-0.171647	-0.0482201
gosai_13518	GCACTAAGGTGCCAGCATCATATACAGGTGGAGCTAATAGATGGGTACCATCAGTGGCATACCAATCTTGCTTGATCTCCACCCCCTGGTCCGACCTTTGATCTTCGGGGCACCGTGATGCATCCTGGCGGACTTTGCCCCTGGGCAGATCAGATAGCATCACCTTGTCATGCCAATGTTTGCCCTGGCAATACAAACAT	300	AdaLead (G)	3.53843	0.0160377	0.129895
gosai_15034	CCAAAGTTGGCACAGCTCATGGCATGTTTGCTTGGCAAACATGCTGGGGCATAGCGGGCAATGACACCATTGTGTGCCCAGGCCGACCTTTGCACCCCAGGTCACCTGATGGGCACCTATGGAATGCACCTGTTATGTAACATCTTCAATGACTCATTGGCATGATAGGTGAGCTAATAGTGCAAGGTATGCGGATGGCA	300	AdaLead (G)	3.3137	0.0215037	0.246543
gosai_14959	TCGAGCATGGTGCCACCTAAGGTCACACAATGCGGGCATTGATGCACGGAAATCCCGCTGCCCTTTGGACTTTGAACTCAACTATTACAAAAAATCACAGGCAACACTCACCCAATGACCACTTGAACTTTGGTCCATGGTCATTGCAAGAGCAAAGTCTCATGCAATCTCAGCAGGCAGGTGTGCTATTACAGGTAGGG	300	AdaLead (G)	3.54135	0.183917	0.343785
gosai_14752	GCATTGCCCATAAGACACAGATTTGCGCATGCAATCTCTGCTAGTGACTACAAAGACATGACGGGGTGAGTAAACATACTATGTTGACTTTGCACCTGTAAGTCCACAAGCCTGGTCATGCCAATGCCACCCCCTGCATGTCCAGCACAATGCCCCTTTGTACAGGTGAGGTCATAGGTATCGCTTGGACTTTGCACCTG	300	AdaLead (G)	4.33299	0.159791	-0.0206215
gosai_13154	GATGGGCATCCTCAGCATCCTTGCCAGTGGGCATGGTACCAGGCTCCGGGAGCATTCCTGCAGGTGCAAAGTCCATCCTGCCGGCAATGCTTGCTTTACCTGTCCCAGCACGTCACTCAATTGGAATGTACATGGTTATGACATGCCCAATATGTGTTCAAGGGTCGTGTGCCCATGGTCCAAGGTCCATTAGTGTACCA	300	AdaLead (G)	3.65171	-0.130388	0.64134
gosai_15069	TGCCAGGTGCCAATGATGGTTGGCAATGCCAATGCTATCTGGTCCAAAGGTCATTGACCAAGGTCCACTGTTAAACATTAACTCACAGATTTGCCCCAGTACAGCTATTGACAAGGTGTCCAAAGACAGAACCTTTGATCCCGTCGAATCAATCCATAAATCTGGTGTCAATCATTGACTGGCACTACCAGGCGCACTGG	300	AdaLead (G)	4.25957	0.227242	0.059475
gosai_15688	CCCAACAGGTGGGCACAGAGAGCCCTTTGATGATAAGCGGGTTGCGTAACCTGTGCACACATAGCCCTGGTGTCCAAAGTGCCCTTTGTGCCAGGGGCCGAGCAAATAAGGTCCATGGGCACGGGGCAAAGTACACAAATGCCCATTGTGTAACATGAATCACAGTAGTTCACCTGTAGTGCTGGATGCCAACTAGGTAC	300	AdaLead (G)	4.22823	0.231924	0.0485123
gosai_14841	CGCGCGCCGTCCAAATCACACCTAATCACAGCTCATGCAGTGATTGATTGAGCATAGCAAATCACGTACATATCAGGTATGCTCATGGCGCAATCTATCGTTAATCATTAACCAATCTGTCAAGTTCATGACCAAAGTCCAACCTAGTGCCATCCGGCATAACAGGTGTTTCGGTCGGTCAAAGTACGCTCACCTGTTGA	300	AdaLead (G)	4.4119	0.273828	-0.0215796
gosai_15756	CAGGTGCATACCTGTCCGGCGATGCTCGCTATCCTGCATCAGACTTTGACCCGTCACCTGTTAGTCAGTCAAGTCCCTATTGATGTAGGGGCACTTTGGTGCATTGTTGATGAATGACCTGGCCGCATTCCTGGTGCGCGCTTAATGTTGGCTTTAAACCCGGTGCAAAGGTCACGCAACAATCTGTGCCACTGTATGCC	300	AdaLead (G)	3.89477	0.0390076	0.0505061
gosai_14473	CACACCTACCTGTTGGCTAGATGCCAACTTGCCCGACGGCTCCATGGGCACAGTTAATAATTAACCCCATTGATGGTCCCAACCCAATCCTTGCCAGGGCAAAGTCCACCACACCAGTCATACGTAACAATCCAAATACACAGATTGATGAAGCCATCAAGGCCAAGGTCAATTCGCAATCACAGGTATGATGGGGCATC	300	AdaLead (G)	3.60717	0.0615753	-0.0433632
gosai_13582	CACGCTGGCACTGATTGCAGGTGCAGAGCTCGCATAGATAGCGCGCACTCACCAGACAGAGATTGCCTTTCATGGTCCTGAAGTGATTGTTGCGCACTGATTGCCAATGTTTGTTCAAGGTGACGTTATCAACTGTTTACCGATCAGGTGACTCAGGTGAATCACAACGCATACCTTGGTCACCTAGGTATGGCAAACAC	300	AdaLead (G)	3.95368	0.23182	0.122328
gosai_12534	TCGAAGCGCTTGAGTACCCACCGGGCCGTCGAAGCGGTTCGACGGCACACGCCTCCACCCACAGTATGATGCCCCTGGCACGAGGTTACCCCATCACACAGAGATCAAAGTACAAAGAGCCCTTTGTTAGAGTACGCAAAGGTGAGTTGCCCAGGGCAAATATTGACTTTACCAATTATGCCAACCTTTGATCGCTGTGC	300	AdaLead (G)	4.15617	0.019994	0.0724243
gosai_14086	CCACCTATGTGTACATAGAAGTTGCCCCATCCCCCTCCCCCCCGCTAGGTGATGCGCGGGTACACGAGATTGGCATGACGGTAAGCCATGGTCAGGTAAATCACGGTGTTGCAATCAACAGGTGGCTATCGGTTGTGAACTTTGCCCCAGAGTGGTTCAAAGTCCAATGTAAATCTGAGATTGACCGGGCAGGGCAAATA	300	AdaLead (G)	3.84724	0.274335	0.219209
gosai_15524	GCTCAACAAGGTGAGCTGAGGTGCCGTGATTTATGATGCACGGCGCATTACATAGCATCTTATACATGACCCTGCCCTGGACTTTGACCTGCAGGTGGTCCTGTCACACCTGGCATTCCCTTATCAGCATTCATCAAGGCTGGCACCTGTCACTATGCCAGGCATGAGTTAGAGTTAATGATTAACCAAGGTGGACTTTG	300	AdaLead (G)	3.09481	-0.0144166	-0.85881
gosai_15371	CATGCAGGTTGCATCAGGTTGGATGCATAGTGGCGCGTACCGTATGTCCAGCAGGTGTTTCACGCACACAAATCTCAGCAAGCACTCTGAAGCCTGGGCCCCTCATAGGTGAGGTCACTAAGCAAACATTCCGGGGCATTACACCACATTCCTATGTGGTTAGGTAAGTGACCCATCCACCTGTCTACCTGCCTGTATGC	300	AdaLead (G)	3.65205	0.329124	0.334994
gosai_13591	GTACCTGGGCACAGGTAGCATCATGCAATGCATCAGGTGGCACTCGCAACTACACTGGCATGCCGCATAGTGGGCATCTAGGTTAATGATTAACCAGACATGCCCATAGTCACTCGTGTGATTACCCAGTTAGGTATGTGGACTTTAGCCTGGCAACACATAGAATGTACCCCTGGCATAGTCCTATCTAGGTTGGTACC	300	AdaLead (G)	5.15138	0.0105681	-0.326475
gosai_15935	GCCGTCGATACCACGAGCGATGCGCTCAGATTTATGATCGCACGCTTACCTCATTAGTGCAAAGTCCAAGGTCAATCAGTGCAAAGACCGTCAACAAAGTCACCTGTCCAAAGGTTACCCCATCACTTTATCCGTTGACCAAATGGACTTGGTCCATGGTCCTGGTACCAGCATCCTTGCTAGGTGGTTAATCATTAACG	300	AdaLead (G)	1.94035	0.0915569	-0.436343
gosai_14397	GGCACGATGCCCAGCAACAGGTACCTGCGCCGCGCTTGCCAGTTCGACGTGCTTGGACGGCACGCATGCCGTAGTGATGCTCATCGCTATAGCTCAGATTTCATTACATTGATGCAACAGATCAAATAGTCCAAAGTCCGTTTCGCAAATCTGGGCAAAATCTGACTCACCTGTTTGGCCTTTGAACCCAAGTCGTGGCA	300	AdaLead (G)	2.8398	0.13528	0.554188
gosai_12868	CTTTGTGCCCAAGCGGACCTTTGATCTTTCCGTTGGCAATATTTGCACAATATTACACAAGCACAGCGTGTGCCCATCCATTAGTGCATAGTCAATATTGTGACAGGGATCTCGTGGCCCACAGGTAGGTCCAAGGTATTGCCCACACCTTTCACCAAATCAGTGCCCAATGCCAAACATGCCCCAACGGGTCAGGTGGG	300	AdaLead (G)	2.41054	0.0513801	-0.132304
gosai_14423	TGATGCACCTGTTCGATGATTAACGCGCTGATGCTGGTACCATTGGTCCTGGCATCTGGTTAATGATTAACCAGTACCCCCAGGGTACAAAGGTCGCTACAGACCATCAGTGGGGTGCCCTTCGGACCCTGGTGACCTTTGCCCTTAGTGTAGTTGGCATGGGCAAAGTTGGCACTTATTATCACCTGGCAGTGATTGCC	300	AdaLead (G)	3.49208	0.143839	-0.0228623
gosai_13848	GGTACCAGGTCTTGGCACATCCGTTGGACGGCTCTTGTTGACCTATGCCAATACGCGTACTACAATGGATGCCATTGACTCAACCTGGTAAATGATTAACCGACCCATTGTGCAACCCCATGACTAGTATGGCACAATGGGTCATTGTACAAACATAGGCTGGCATCCTTGACAGTGATGCCAGGGCAACAGGTAGGTAC	300	AdaLead (G)	2.82166	-0.130643	0.301745
gosai_15065	TCGACCAAGGTACGCTACACGGTTCAAAGTTCGGCATACCTGGTTGCATAACGTGCCCGCTGCCACACTGCTGGAGGTCCGTGTCACCTCTGCCCCCTGAGTGTCCATTGTGCAAGGTGCCCGGTCCAATGCCAGTTATTTGTGTTGGGCAGTCCAAAGTCCGGGCATTGTGCCCTTTGAACCCTCATTGATGCCAACCG	300	AdaLead (G)	2.80654	0.22241	0.339105
gosai_13411	CTTGACTGATGCCACTGCACAGATTAATGTTCAACCTGGCATGATGGACTTTGAACCCTGGGTAGTGGCACATCCTGGTATTGACATATGCCAGTTGGCACCGGGTTCTATGAGTAGTGCCATTGTGCCAACATCCAATGGTTAATCATTCACCATTCCGCAATGTGCCAGATCAAAGAGGTACCTTAGGTAACACCTGG	300	AdaLead (G)	3.00028	-0.0608917	0.0997169
gosai_13951	GAGCGTTACAGGTGTGCAAGTGGGCATGGCGGTTACTCGATGCACCTGCACGCACATACCAATGCCAACTGTCGTCCAAAGGTCGAGATTTACAACACCTAGTTGCGCAATATTTACCTATCCCAATCAAACCCGGTCCAAAGGTCGGTGAGATAGTGAACTTTGGATGGGCACAACGATATGGCACTGATTTATTAGGG	300	AdaLead (G)	2.69556	0.145342	0.0847878
gosai_14898	CATGGTGCCAGGTGCCCTGGCGCTCAGGTTGGCACGCTGTGCCCATTGATTGTGCCCACCTGTGAACAAATATACCCAATGGGGCCTAGACCGCAGGATGACCTTTGATCCTATTGAGTCAACAAGGAGATCACACATCCAAAGTCCAGTCAACAGGCACAGATTGAGCAAATATTGATCACCTGCCGTCAAAGATGCCA	300	AdaLead (G)	3.49321	0.0877691	-0.101321
gosai_15886	ACCTTCGAACTCCGTTGCGCAACCATAGATTAGCGCATCGTTGGCACCGCCTGGCACCAATGCTGCAATGCCACATCTGGTTAATCTATAACCTCTGACTCCAATCTCAACAATGAGTCTTTTGTTTGATCAAACACACCTGTTATGCAACCCTCATCATCCTTGAATAGGGCACACTTTTTAGGGCTTGTCGTGGCATC	300	AdaLead (G)	2.43419	-0.393733	0.0274343
gosai_13974	GGTGTCCCATGTTTACTGGTACAAAGTCCAGCCCTCGAACAAACAGGTGTTAATGATTAACCATCTTTGACCTGACCTGGTCCAATGCCAGGGTGCCCCAAGTGTAAACAGGGCACACTGACCAAATAGGACAATGTTGGCATAGTTATGACGGGCATGCCAACCCTGGTACTTTGGCCTGGCATATGCCATCGATGCCA	300	AdaLead (G)	2.97877	0.076231	0.14367
gosai_15802	ATGATGCGGACTTTGTACCTGTTCACCTGCATTCCTGATGCCCGTGCCCTGGCAGTGCCCTGCACACACAAACAGTCGCCCTTTGTCCCCATGCCACCTGCACCTTGGTCCATGACCTCACCTTGCACAATTTCTGAGATCAAAGTACAAGTTAGGACTGTGCCCGTGTGTCACCAGTTGGGTATAGTTGGCACAGTTGG	300	AdaLead (G)	2.24853	0.0846624	0.146956
gosai_12736	GGGCAAGGTGCACCTGTGCCAACCGTGCCCCGTGACAGCGCTGCCCAGGGGGGCATATGTCAACAATGATGTAAGGAAACAACCTCGGTTCAAAGGTCAATGTCCACCTGTTGCATCAGTGATTGAAGAATTTCCGGCTACCAGATTAGCAAATATTGGGTTGCAGGTTGGCATAGATGGGGATGCCAGGTTGCATCCAT	300	AdaLead (G)	1.49495	-0.110862	-0.181766
gosai_13633	TCTACACCGGGGCACAGGTATATTCGACGGCACCAGGCTGGTTACCCTGGCATCTTGGCATCAGTGCATTCACTATTGACTTCCTATCTAAAGTCAATACACAATGCAAGCATGCCCTTGTTTGCCCAAGCAAATATTTGCCAAGCAAATAGTTCTACCCAGTACAAAGGGTGCTCTGTGCCAGGCCACCTTGCCTATGC	300	AdaLead (G)	3.15478	-0.0736498	0.224976
gosai_13224	GCGTTCGGTTCGAAGTTCAAGGTAAATCAGTGCCAGATGTACTTTACAGGTCGCGGACTTTGGACCGGTGTGACTCATCCGGTGCCAGGCAATCACACCTTGCCCCTAGATGGGCATCAATACTCTGTGCCCGTCAAGATGCCCATGAACCCATCACAAGGTTAATGATTAGCTAATTCAAGTCCGATGGTATGGTACCC	300	AdaLead (G)	3.0987	0.0532677	-0.0374214
gosai_15771	CACACCTGCGGACTTCCGTTTACCTTTGCAACAGGTGAATCACTGCTTCCAATCACGGCAGCGCAAACAAGCAGGGATTTGATGGGGGTTAGTCATGCTTGTGTTACACCTGATGGTCCATCATACACCAAAGGTGTGTTGACATACCTAGCGTATTAGTCATGCCCCAATGCAATGTTTGCCCAACTAAGTGGGCACAA	300	AdaLead (G)	3.00839	0.21258	0.00232699
gosai_14206	GCAGGTGTGCCACTTTGCGGTGCCACTGCGCATTTGGCACCCGAATCTTGCACAAGTGGTTAATGATTAACTAAATCACAGCCAGGATTTGGACATTGGGCAAACAGATTGCGCAATGCAATCTGGATTAGCACAGGTAGATTGCATCAGGTACAGGTGGTGCCATCCTACCTGGCACCTGTAGGGCACTACCAACATCG	300	AdaLead (G)	1.51895	0.336971	0.0956045
gosai_12774	CCTTTGGAATGCCAGGCCGAGATTGATAATGCCAGTGCCCCATCCTGGCACTGCCCATGTTGCACAACTTGGGTTCAAAGTCCAATAGAACGGGTACAAAGTCCAAACTTGGCATTAGACTAGAGTGGTATGTTGACCTACAGGTAAATGATTAACCCAGTGCCAGGCATCGAGTTGGGTACCATGCGCACCTGTATGCC	300	AdaLead (G)	3.34033	0.144465	-0.0248347
gosai_14729	TGACCTGCTGTTGGCACCCAGGGACAGGGCACAGAGGCTGTGGAAATATCCACCAACACCTGTGATTTGCAGTGATTACCGTGCTTACATAACAGGTATGTCCCGCATTCCTGCGGTGAAACAAAGGCGCCTTTGTCACCTGCGATGCAATCACAGGTAAGCATGCCCTCACGTAACACCTGTGGAAAATTCCGTGGTCC	300	AdaLead (G)	1.93258	0.0653875	0.151076
gosai_15215	CATCGTTGCGTACCTAGGTGGCAGAGTGCCACCTGTCGCTGTCAGGATGCCCGGTTACCTACCTACGGCTCAGATTCCTAGTGCATGACTCAGGGTCAAAGTCCAGTTCAGATTCATGAAATCACAGCACAGGTGTGGGAATGCACATAGAGTCCTATCTGTGGTCCAAAGTCCACATTCCTCAAGGTTGGCATCTGCCA	300	AdaLead (G)	3.08902	0.147555	-0.178197
gosai_13302	TCTCATCAGATGGGCACACCGGTAATGCTAACCTTTGGACCGCTCGGTATGATGGCACCATGCCAGGGGAGGGGGTTACGGGGTTCAGAGTCCACAGTCCATGGACTTTGGACTGGGCCTTACGTGCATTACATCCCTTTACCGGTGCATCCGTCCAACAGAGTGGGTACCTTTACCTGACTGTTTGCCCATCCCGTTGG	300	AdaLead (G)	1.84412	0.153157	-0.17211
gosai_12692	GGCTGGCATCAATGCCCATTGTGCCACCCTGCAAATATTGACTTTATCGCATCACGTCATTTGCCCCTTTGCCCCCAAGGCTTTCACAATTTGATCTGGGGGGATGATGCCATCCTGTTGGCCAACCTAGAGTACAAAGTCTATCCAAAGTCAATATTTGCCCACCTGTCCCTGGTACCTACCCAATGTGGCATCTGTAC	300	AdaLead (G)	3.24713	0.249844	0.0320047
gosai_13513	ATCACCTGTTAATGTTTAACCAGGACGGTTACGCAATAGATGCTTATCTAAGCCGGACTTTGACCGTGATTTACGCGGGTAGTGTACAGGTGCGTTTAGCAGTGATTCATTGCTAGATAACAGGTGCACAGGTGCCTCACCTGCACCTGCGCCTTATGTAACCCCATATGACCCTAATCACAGCTACCGGGCAAATCTGG	300	AdaLead (G)	2.1037	0.0660513	-0.848181
gosai_13714	TGATTTATTCAGCATCCTTGGTTAATCATTAACCAGCAAGGTGTTACCTAACCATACCATGGCACCTTTGTGCTTTGGCAACCTGGCATTACATGTTGTGCAAGCCTGGGCTTGTGTAATACCCTTACATAATCCCTACACATCATTATCAGGTGAACGTCATGCCAGGCAAGGTGATACCATACCACTAGGTTGGCATC	300	AdaLead (G)	1.52242	0.141925	0.316776
gosai_14179	TCGAAAGAGTCAGTCTCTAGCGTGACCCAGCCTGGCAACAATGCCACCGGGCAGTATTGGTCTTACATAACCGGTCCAAAGTCCAAGGGAATCAAAGTCCACCACTCTATGAGTAACCTGGCAAACAATCTGGTGGTTGCGCAATCACAGGCGCACAGGTGTGCAAGGTGATCAGGTGCCAGGGGAATGTGCCAAGTTGG	300	AdaLead (G)	1.72189	0.2503	0.209095
gosai_12903	GGGGCACGCGCTGTCCCATCATCTAGTTAATGATTAACCAGACGGGTACAAAGTTCAGTGCCAGGCTGAGATTAAGCGGGCATAGTGCCAGGTGGCACAGTTGGTACATTGTGCCAGGTTAATTATTAACCTAAAGGGATAGGTGGGGTATGGCAGGTGCATCATTAGTTGATGGGTACCACAATGGCATCACCGATGGG	300	AdaLead (G)	2.71693	0.000995909	-0.1731
gosai_14394	CCCGTCGAGTCATGCATGGCAGGTGTTTGCCCGTCGATAAGACGGTGAGTCACCGCCGCCAATGCAAGCACAGTCGTGCCATTGATGGCAGGTAAGAGTTCAAAGTCCGTGATTGATTGTGCAACCCATCAACACTTTGATTGATGACCTTGACATGTTGCGCAAATCTGTGTTTGCCCACTCGCATGGCACATCAACCC	300	AdaLead (G)	1.96051	0.228773	-0.27733
gosai_14433	TTCGACGGCAGGTGCGCGATGCGCATCGCATAGCTCGCATTCCAGGTCATATTTGCCAATTACACATCCCTGAGACCTTGATTGCGCAACCGTCAATTAGTGGGGTCCAAAGGTCACTCAACGTCTATGAATTTCCTGCAATCAGTGCAGCTCACACTAGGTACCCAAGGTCGGACAGTGATGCCCATTTGTTTGACCAA	300	AdaLead (G)	1.55822	0.338123	0.0742953
gosai_15855	TCGAGGTGTCAATCTACCTGTATCAGATAGCCAGATTTGCCCCCTCCGATTGATTGGATAAGGTAGTTAGTCAATAGGACCTGACCTTTGACCTTGATGTGGCAAATCACTGAGCATCCAGTGCCCGCAGGCTGTTAATGGGTAACCAACACCAAATGTGCCCACCTGGCACTGGGCAAATACCATAGTTAATGGTTAAC	300	AdaLead (G)	4.74038	0.0348671	-0.163375
gosai_14060	GGTGATTGGCATGTGCCCTCATACCCATGTTTGCCCAACAGCCGCCCCGCTTGGGACAGGCGCAGCAGGTGGACTTTGTACCCGACGGCCGTATGACCACGGTCTATTTAAACTAGGCATTCCTAAGCTATGAGGTATGGTGTCAACATAACTATAACATCAAACAAACATGAGTAGTAACGGCGGGCATCACTGATGGG	300	AdaLead (G)	4.85263	0.309136	0.0512069
gosai_13026	TGATTTTGCACAGGTGCAGGCAAACGCTTATGCCAACATTGCATTCGACGGATGAGCTCATCGATAAGCCAATGACCCATGACCTTTGCCCCTAATCGGTACCGGTGACCGCCTACCTGATACCTGTCCGGTAAATCACAGCCCATGATTGAGTTGGTACGCAATGGTTCAAAGTCCATTGATGCACCTTGTGGTATGGG	300	AdaLead (G)	1.50031	0.301944	-0.114117
gosai_13415	CATCCTGGCACCCTTGAGCATCACCATCACTTAGTTAATCATTAACCAAAGGTGCGGTCATGCAGTTGGCATGGGCAATGGTATACTTACCCGGACTTTGAACTATTTAGTTGATGTTCAAAGGGTTACTATGCCGTGATTGAGCAAACAGAAATCAGAGCATGGGCATAGGGTGTTGGGCATCAATGCACCTGCAGGTG	300	AdaLead (G)	4.74187	-0.260183	-0.493758
gosai_29366	GTTATCCTGAAGTGTTTTGGGAGCCGTAGGTTCGAGGCACGTTGATTGGGCCTGTTGTGATTTTATATCTAAGGGGACTTCGTGGTGGTTAGGTAAATACCCTCTGACCAGATACACGCCAGATCGGCCATGCATGACCTGTCATCACACAGGAATGTCCTTCACAAGGGCCTCTTTACATGGGATAGACCCGACCTTTG	300	FastSeqProp (G)	4.84897	0.278752	0.717836
gosai_29574	GGCCGGTGCCCACGGTCCAAAGTCCAGTTGGTGCACTTTGTACCCCGACGCCCAGATAGACCTCACTAACTAAGTCCGCCGAACCATACGTAAATCTGCACCCTGATTCATGTTGTCCACACCTTGGTTAATCATCAACCATGGTACCATGCCATAGTAGCACTGGTAACGCTCCCATCAAGGGTACCATTGTTCTGGTG	300	FastSeqProp (G)	5.04805	-0.108263	0.437229
gosai_32785	TACCTGTACTGAGCTGCACAAGCCACCACATTGGGCGATCCGAACAGCATGGCCGTGATTTGGAGAGCCCATTCATATGAATATATGATATTAACGAATACGGCCGGGAGCCTGCGCGTATCGGGGGTGCTGGGATACTCTCTTCGCACAGTGAACAAACACACAAAGGTAGTTAATGTGTAACCCTTACCCGGTGTTTA	300	FastSeqProp (G)	4.88229	-0.00326119	0.333138
gosai_26709	GGACGCAGACTAATTAAAACCTCTATAGGACGTCCCTCATGCGCGGCGAATGGATCGCATGCCTAAGTCCAAAGTTCACACAAAGGGCCTTTGTTCACTCATTAAACACCGGGGTCCAATGTCCAAAGACTGTTAAATTGTAGACAATAATGCACTATGGACCCTGGGCTTATAGCATCGCAGTCTGCCATACAAATGGG	300	FastSeqProp (G)	4.72672	0.260089	0.803503
gosai_32018	GCTGATGATCGGCGACAGTAAGGGGCTCAGGCAAACCTTGCCGTGTGTACCGTGATTCTTCATAAAACAACATTCTCTACCCTGTGACTTGGATCAAAGGGCTCATTTTGTAACCAATGTTAATAGCCACACAATGAGCCCTTTGTTTGCCCAACGGGTCCAAGGTCATTGAAAACCAAACATAGTTTTTACTTGATGCA	300	FastSeqProp (G)	4.77448	0.258213	0.620251
gosai_29479	GACAGACACGATCCCGAACTATCTTGGGACGTACAGGTGTATGTCCGGGTTCAGGCATGGTGTAAAAAGTTTAGGGTGTGAGAGGCATGAAAGCCTAACCTTCGATGATGCTGTGGCCTCCATATTTGTTCCACCGCCACCTGGCATTCCGAAGCAATGCCCATGGTTAATGTTTAACCCAGGCCCGGTGATCCAAAGAT	300	FastSeqProp (G)	4.41149	-0.0808229	0.55642
gosai_27513	TGATAGGAACTCGACTAGTGCGTGATGCCACGTTTACCTGGATAAAAAGCTACTTTTGTTCACGCAATGAGCCTTAAACAAATAGCCCTTTGTTACACTACCAAGGTATGTGATTCATTAACTAGGTCTGGGCCCTTGATTCACTAGGGACGCAACGTGCAGGTATGTGTGCCTCGTAGTAATATTCACGCACACCAGTT	300	FastSeqProp (G)	5.38798	0.187823	0.542819
gosai_28459	CCAATTAGGACGGGAATGGTACACTGGTTAATGATTAACCTGGTACCGTTGCATTACGAGTGGCGCATCATAGAAAATGATGGAGTGCAGACATCAAGTCATGCGTGTATCCTGGTTAAACATTAACCAAGGTGCCGAGGGCTGCCCAGCAAGTAGGTTAAAAGAAATGCCTGGTATTCCGGTTGGGAAGGGTGGTGTAC	300	FastSeqProp (G)	5.49781	0.351532	0.652197
gosai_25567	GCGGCGGCTTCAGGCCATGGGTTTGATTCAACACCTGGTTAATCATTAACCAGGAAGCTTGATCATTCGCTATGACCTTTGCACCTGTCCCAGTGCCGTGCACAGATTTACTCAGGAACGGGTGCGATTACTTGCTTCAGTTACACCCATTCCAAAGGCTGACTGTCGTCTCGTGCAACTTTAACGTCAGGTGCAAAGTC	300	FastSeqProp (G)	5.34981	0.370237	0.55147
gosai_32831	GTGTGCACCCGCGGCCATCACTGACATTATTGCAGGTAGAATTTAAGAACTCGTGGCGCGACTTTACGGTCCTTTATGAGACTTATCCGCATGATTGGTGCTCTCCCTAGGCGTATTAGTCCCATTGTGTACATACCCTAGGTCGCTCAGAATGCAAGGGTCACTCAGTTCACAAGTACAATGGGCCCATTGTAAATGTA	300	FastSeqProp (G)	4.53966	0.302165	0.713362
gosai_27291	GGTACCCTGACGCGGGCACCCGATCTCTGTCAGGTGCTTCAGTCGCGAGAGTGCTCCGCTCGTCTTCTGAGGGTACTGTAGTCATTTGCGTCCTTTTTCCCCTGATGTGGCTGGAGAACCTAGTTAACCTTTAACTAGACCATACACAAACACGGGCCCTGTGGGCGCGAGGCCCCATCGCAGCTTCTCTACTCCTGGTA	300	FastSeqProp (G)	4.66941	0.227269	0.463157
gosai_26221	GCTCGCGCGCCGGAGCACATACCGGTCGTGTCATCTTGGCGTAAAAGGAATTTTCTTGTGGGAGATGGACTTTGTCCCCCTATTGTACGAATCTGAACACGGCCAACATTGACTACATCACCGGTTAATCATTAACCAAGGGTACAAACCTCCCAATCTGTGCCAGCTGCTGATAGCGATGAGGTGCAAGGTGCCATTTG	300	FastSeqProp (G)	5.27351	0.378057	0.766361
gosai_32046	GCTAGCACCCGAGCTATCGCGTCCTTAGCCGTGAGCTCTGTCCTCCTCGAATCTAGTCCGGTTTACATTGAGCAAATATTGACTTAGTACCATAGAGATATCCGCTTCATCCAAATACCTTGCACCCAGAACAAAGAGCCCATTGTGTACACATTGTGTGTACTCATTGAGGGTGGCCTCAGCACATGTACCAAGATTAA	300	FastSeqProp (G)	4.52121	0.241822	0.597646
gosai_32179	GGTCAGTGTCCATGTCGCAATGGATGGTAGATGGAAGGCACGGCACTAGTGGCACTGCCATGGCGGAGTGTACCTGGGTATGAATCAGAGCGCCAAGTCATTACGCTCCCCATAATATACCCCAAAGCAAATATTTACTTCGCTTAGGTCAACAAACACAAAGAAACCTTTGTGCACACTATGCCCATGTTTGCTTTGTG	300	FastSeqProp (G)	4.43385	0.235411	0.562696
gosai_32326	TGCTCAATTCCTAAATAGAAGATGTACGTATTGCGGTGTGCGACACCGGACAGGCGTTACGCGCTCAATTTGGCTTAGGGGGTCAAGGTTAGTATGTGTTTTTATTCACTAACACAAAGCGACCTTTGATCCGTGATTGACTACATACCAAACGCCCACAATGGGCGCTTTGTGTTCTGATAGAAGCACACAGGTATGTA	300	FastSeqProp (G)	4.55011	0.297881	0.638858
gosai_32120	CATCCCAGGACTACCTCTCGCCGGAACCCTTCACTAATATTTACCCAGGGCAATGTTTGCTCAGAAAGGGGTGCGAGCCGTGGACGCGGTTGACAGGGGGCTAAGGTCGACGAGCCCGTTCCCTTGCGCTGTGTACATTTGGCTAGTACGCCAGCTACCCGAGATCAAAGGGCCATTGTGCCACCCTAAGCCAATATTTA	300	FastSeqProp (G)	4.55368	0.31663	0.656805
gosai_25714	GGCACCCAGGTGCCAACCGGGTTGCATGCTCGGGGTTCGGATATAGCCTGCTGCCAACATTTCGTCCCAGCAATGCCAATAAGCACCCTGGTTAATCAGTTACACGGATCCCACCCGGTAGCTATGCATCCTTTTGGTTAAACATTAACCATGTTGAAAGATTATGCAATAACCCTGGTACCAAGGGCATAGTACAGGTG	300	FastSeqProp (G)	5.43665	0.370528	0.36486
gosai_26602	GGTCCACAGTCCAAAGTCCACTGCTCTGATTGCACCGTGCCGCTTCAAAGTCCTTGTTGCCCCCCACAAGAGCGTGAAGGACGTTCTAGGTTATGGACTTTGGACCCTCCTCCTTAATGGGTATACACGTACAAAGGAGCTTTGTACCCTTTACATACATGTCGAGCCCATTGTTTCACTACTTCACGAGGTGCAAAGTC	300	FastSeqProp (G)	4.3967	0.102199	0.510284
gosai_25786	GCTATCCTGCCCGTCGTGAGAAATGTACCCTGGTTAATCATTAACCAGGTACCTCCACATGGCGTCATCGGACCCTAAGGTCAAGGGTAAATCTGTGCTTGGCAGTCAAATTAGCTCGTAATCCAAGGTGAAAAGTCCCCTATTAAACGTTCTATCAACTGATAGATGAACCTTGTACCGTTTGGTACGGGAGAAAAGTC	300	FastSeqProp (G)	5.49472	0.35431	0.403342
gosai_29762	CCTCGAAACATACGGTTCGCGAAAAATCCTGCGAGTGAGTGCTAGGCTCTCAGAGTACTGTTGATCCTGCCTAGCGGGTAAATCACTGCATCTCCATCTCTGGTTAATCATTAACCATGGTCCACATACAGTAGCATAAAAGGAACAAGGCTAATGGTACAATGTTCAAAGTCCACTGCATGCCAAGTCTTCTTGGTGCC	300	FastSeqProp (G)	5.49669	0.34823	0.382406
gosai_24566	TCTCGTGCCACCCAGTCCCCCGCACCGCTGGTTAATGATGAACCACCGGGTGAACTTTGGACCCCGGCCTAGAATTAAATATGAGGACATGTTTTATGGTCAAACATAGACACAACCAATCCACCATGTTGATCCAATGTTTACTCAATCACAGTCCAAAGTCCAATAAAACAGTACCACCTTACCACCCTGTTAGTGGG	300	FastSeqProp (G)	4.80836	0.255563	0.499668
gosai_32010	CTCAAGGTCGGTGCAGTAACCGCCGCGCCGCCCGTATCGTACCTGGTTAAATATTTACAAGGCGACAGGGCCATTTGATCGCTGTTAAATAACCGATACGCCGTTAGGGCGTTAATGAACAATCCCAACTCCGTGCCCTGTCTGCTACGTAACCAGTATGGTGCACCTTGCCTGTAAATATTTAACCTGGCCCATGTTTA	300	FastSeqProp (G)	5.53541	0.396338	0.471154
gosai_24288	TCTGCATTTACGGATAAATTAGTGCGGTGCACAGATTGCGCTAGGAGTGCACTTTGGTTAATCATTACCCTTGGACCGTGGACCTTCTGGCATGGTTTCTTGACGAAGAAGAGGTCCAAAGTCTAATGTTCATGTTGCACCTTAATAAAAAGTCCAAACATCAAAGCCTCGTTGTGTACTCATCACGAGGGTGCAAAGTC	300	FastSeqProp (G)	5.42353	0.372109	0.357448
gosai_25085	CCTGGCACCGGTGTCTGGGGGTACAGGTGCACCTGCGATGGCTCATATTTACCATATACCAAATATTGCAGAAAACGTAGCTCCATGCCTGCCGGGTAGCGGCCGTGAGCTGGGTGCCAGGTTAATCAATAACCTAGTTAATCATTACCCATGGTACATGGGCACCCTGAGGGTGGGCATTGGGCCTAGCGCTAGGTGCC	300	FastSeqProp (G)	4.09275	-0.25111	-0.304032
gosai_26945	CACCTGCGCGTCAGAGTCCGCGGGAACTCGGTGTGAAGTCAGCGGGGCCTGGTCCATACAGGTATTGTTGATCATGGTCAAAGGTGAACAAAGGGCCCTTTGTTCTGATGAGCTATTTCAGGGTCAAGGTCAGCGTCTGATTCAAACACTCACCACTGTTTACACTGGTAAGGTGAACAGTGGCAAATATCTCTTAGTTT	300	FastSeqProp (G)	5.35923	0.41053	0.424013
gosai_31484	GGTACGACCACGTACCAGGTTAATCTTTAACCATGGTCGACTGGCACACCAGGCGTTCGGTTAACTTAGTGACCGCCACTGCCCTTTGAACTTCCTTTTAAGACTCAATACAAATTAGCTGATGGAGAAAGGTGTCCTTTGGACCCTGAATTTAATTAGCAGAAGCATTTCTATATAGAGCCCAAGCTAGCCAAGGTTGG	300	FastSeqProp (G)	5.32779	0.231586	0.267045
gosai_30448	GTCAGGCATCCCGAGTGTGATGGCAGCTCATCCGCCCGCGAGCGTGCGGTATGCCAGATATACGGAATTTCCCGCAAGGGGGGGTGTACCTAGTTAATATTTACTCAAGACCCGGTCACCTAGATTAACCATGCACGGAAAGACAATCAGAACAAAGGGCCATTGTGTACACAAAGTTGGTACACTTAGGACAGCAGGAC	300	FastSeqProp (G)	5.22487	0.152936	0.283397
gosai_24338	GCTGGCACATCTTGCACTGGCACCTGCACATTGCACTTTGTACCGTTGGCATCCCAGCAGCTGGTTAATCATTAACCATGGGTGGCGTCCTAATACCTTGGGTGGATTACGGTCCCAAGTCCTAACACGAGAACTTTGATCAATTGTGCTCCAAAGTCCAGGGGCCTGAGAACAGAACCGATGCTATAGCCCAGGGTGCC	300	FastSeqProp (G)	5.19329	0.327226	0.601466
gosai_27595	CCTGGTGCCAGGTTCTCGTGCCGCGACGCTGTCTGGGCCAACCGTACCAGGGAATACCTCTTTGTACGCAAATTTTTCTCTGCTCATCCGGCGCACTTTGCTTGGGTTCAGTGTGCAATGGCCCAGATCAAACACACAGTTTATTAATTATTAACTAAGGCGGCGTTCAGTGCATACCTTGCACAATCCGCAAGCTCAAA	300	FastSeqProp (G)	5.27013	0.40463	0.514786
gosai_31620	GCTGGCGACGTCTGGCATCGTCATGTCAACCTGGTTAATCAATAGCCAGGGTACCGAGCCTGGTATCTATCATGGGGAGCGGCGAGGACGTGGACCTTGGACCCCTATTCACCGAGTGGCGTTAGGTTATTCTTTATACCAAGCGTACAAAGTACAATGCCCAATGTACCATTGTATCTCCTGGCACTGGGTACAAAGTC	300	FastSeqProp (G)	4.11426	-0.0486297	0.0639442
gosai_26334	GTTCGTAGTAATTCGAGGTGGCAACAGGTAGCTAGGCAGACTTTGCCCCGTTTTTCCCGTCAATAGCCGCAGTACCCACGTTAATGATTAACCAACCAATGGCCCAAGGTCCCAAATGATAAAAAAAAAACCTAATGAATCATTAGCCAATGTTAGTGAATAAGTACCTGAGGTTAGGAACAGTGGTGCACAAGATGGTC	300	FastSeqProp (G)	5.33288	0.265819	0.240374
gosai_25222	ACTGACCTTTGAACCCAGGTTGGAACTGAGAACGCACAGGTCCAAAGTCCAATTAAAGTAATAGTACGTAACCCTGACTCTACCCCCAAGGCAACATGTTTTGCGTTAAAGCTGTACCTCTGGTTAAACATTAACAAGGTACCGTACCCAATCCGGATAGATGTAGAAGAAAATCGAGTGCCAGGGTACATAGTGGTACC	300	FastSeqProp (G)	5.37939	0.327891	0.27669
gosai_30900	TGCTCGCTTCCAGGACAAATCAGTGCTGTACCCTGTGATCTCAAAGGGGCTATGTTAAACTGTAACCGTAAAACAAACAAACCTTTGTGTAACACAGTGGTTGCCAGGCCCAAGGTCGCTGAGGGTATAATAGCCGCAGTGATCAGGTGGGATCCCAAGCCTCATAATCCATCCATTTTGTAAGTACAGGGGTCCAAGGT	300	FastSeqProp (G)	5.67248	0.139463	0.120984
gosai_32560	GGTGCTCAGTCGCTCGCGCGAACATGGGCGTTGAGTCGTCAGCACACCCTGTCTAGGAATATGGCTTAGCCGTCTTCCAACTTAACTGTTGCAGTAGGCCCTGGGGCTCAATATCCTTGTAATTCATTAACCAGGGATTCACACAGAGGAATGTTCTGTAACCAGGGACCAGAGCCCGAAGGTCAATTAACTGGTATTTA	300	FastSeqProp (G)	5.54828	0.260119	0.0947026
gosai_28020	GTCTTTGCACCTGCACCTGGTAGTCTAGGAGGGTTACCTGGTTAATGATTAACCTGGCACCATGCAACTGGCATTGGTGAATCTGGATGGTAAAGTGACGTCGCTCAACTTGATTAATATTAACCCTCAATCATGGTTAATCATAAACTAGGGTGCCCCTTCGACCAGTCGTTAACTGCCAACATGGATAACCTTTAACC	300	FastSeqProp (G)	5.5521	0.386778	0.538964
gosai_32181	TCAATGTTTACCCATGGTGAACAAAGGGCCCTTTGTGCCCACAACGCGGTGATTGTGTAACCTGTGCAGGTCTAGGGCCGAACCTTCCGCTCTGTCTCACCGCGACCGTCTGTCTGCTCAACCCCGGAGATAATATAAATATCGGTCATGCAGCCAGACAGGTGTACCAGTGGATCAGCTCGGCTACGAAGACCGCCGCG	300	FastSeqProp (G)	4.12815	0.156241	0.537177
gosai_24025	GCATTTAGTTAATCATTAACCTGCGCCGAGATATGGAACAGGAGCGAAGGGGTCAGTTTGGTACCTTGGTTAATCATTAACGAGGTAAGGATGTCACGCGTACCATGGTGCCCGGTCGCTCGCATCTCTGGTTAGCACAAGGGCAAAGGTCCATTGTGTAACCTATACATGGGCATTTGATCCAAAATCAGTGCAAAGTC	300	FastSeqProp (G)	5.21288	-0.0693144	-0.0239284
gosai_25311	CCTCGAGTGCATAGGTGCCAAGGATAACTAGTTCAGGTGCACTTTGAACCCTGGCACCTAGGCAATAGTTTACCCCCCGGTTAATGATTAACTAGTTTACGTTTTGGCACAAGAGATTTACTTCCAAGATATCGTCCTAAACGGGGATAGTTCCGGTACAAAGGGCCTTTGTACCTGTACCGGTTTGAATGTAGGTTGGC	300	FastSeqProp (G)	5.1619	0.394763	0.600215
gosai_25844	CGGTGCCAAACGGACTGCAGACCTAGTACCCTGGTTAATCATTAACCAAGGTTCCGGGCCATGCGTGACTTATTTAACGAGATAATTTGTAAACGGATATCTGTTTTGATAATAATTTATCACTGACCAAGTGCACCTTTGATCAGTAGCACGGGTCCAAAGTCGAAATTCAGTCCAGGGGTATGCCAAGTGTACAGGTG	300	FastSeqProp (G)	5.19966	0.304478	0.433904
gosai_24062	GTATGCACCGGTTCGCTAATTCGGTATTGCCAACCTGGTTAATCATTAACCAAGGGGGTCACAGTCCGGAAAGCCGTAGGGGTGCGGACGTCCACTGCATAACAGAATAAGACTTAGAATTATTATTTATGCTCGATGGACTTTGCACCTGTGCAAATCACGGCCCGGCACTCGGTATGCCAAGGCGCAAAGTCCACTTG	300	FastSeqProp (G)	4.35177	0.269493	0.607564
gosai_27440	CACGTCGACACATCGTGAGGGTCCCCCTATACATTTGTCCCAAGCCTTCTGTACGGAGCCTACTTATAAGCTGTTGTACAGTTCCTGGATGTCAAACACAAAGGCTCTATTGTTTCTGGCAAGCTCATATGACCTTCATCACTTACATAGCATTTACCTGTCCGCACCCATACACAGATGAGGTCGCACGGGGCAAAGTC	300	FastSeqProp (G)	4.18198	0.16298	0.511518
gosai_32042	AAGGTGCACCTGTGCAAAAAACGGCCCGCGCCGTGTGCGTGCTTAGCAGTGATTTGGACGTGGCGCGTCCTGCTCCTCAAATCAAACAGACCAAGTCCCCGATTGCCCGCTTAGTTAATATTTACTCAGAGTATGTTTACCTTTGATGCCGCACTCACCGGGTTCGCTACGCGCAGTGCATTGCACGAATATAGGATTGG	300	FastSeqProp (G)	4.56624	0.17575	0.344076
gosai_31125	GATGCTGATATTGATAATCCAGCGTTCGTATAGGGAGGCATAGGCCCTGTGCCTCGCTAACGATCCCCGGGAGATCCGCTTACTATGAATGAGCACAGAGGGGACTTTACGATCCAATAAAGGATCACTTCGTTTGAACCCTTTACTCACAATAAAGGCTTTGTTTGCTTAGGAACGGTTGCGACCTTGAACTCTGATTA	300	FastSeqProp (G)	4.49298	0.19219	0.33315
gosai_27356	CAGGTTCACGGCGAAGATGCCCCATGTCCGGTGTTGTGGAACGACCGTATATACCATCCTGGGTAGTGTGTGACGAGAACGTAGGCTGGTGTTCGTTAATGATTAATATCCAAAGGTTACATAACCGGTAGTCAAACACCTGGCCTAGTCACGCAGGTCCCTGTACGGAATCGGCCAACCTTAAGCTTAGGGGGCTCTTG	300	FastSeqProp (G)	5.30113	0.233095	0.189617
gosai_28294	CCTCGTAGTGCCAGATCATCAGTTTGGTGCCCATGGTTAATGATTAGCCAGGGCTGATGTGGTAGACGATTATCGATGCAAATAAACTATGCCAATAATATTCTTGTAGTCTAGTTAATCATTAACCAGGGGGCATTCGTTTGTTCAGAAATGCGGCGCCCATCAATGCTAGTTACCTAGTTACCGCAGGTGCCCGGGTA	300	FastSeqProp (G)	4.42759	0.155699	0.297547
gosai_31467	ACCGCGTATGCCAACCTGGTTAATCATTAACCAAGGTGTGCCAATCGCAGCTATTAACTGGCCGAGCGCAATCCTGGTTAATCATTAACCAAGGTCGTGGACACGAGCCCTTTTCGGATTGATGCTTTGTCCATAAGCCTATGAATAGTCAGGGTAAAAATACTGCACCTTGGACCCTGGTACGGTGCAGGTGCCCGGTG	300	FastSeqProp (G)	5.25141	0.376759	0.265688
gosai_26105	CTTGGTTAATCATTAACAAGGTACTGCGGCCGCAGTAGCACCTTCTAATGTGGCACTCGAATACTGAAAGTAGCTATAATGGTCCAGAGTCCAGTTTACATACATATATATGTCATAAGGGCTCCAAACGAGGATCGTAAACCCATTGCTAACCATTAACTAGGATGTACGTTTGTACCATTTGTCAAATCATGGGTACC	300	FastSeqProp (G)	4.5299	-0.0569206	0.140542
gosai_27984	GCACAGGTACACCTGCCTCGCCTCAAACGAAACTGTGTCGCATTACCAACCGCTGGCCCTAATCCTTGTTAATTAATAACCTGGTACCCGTACCGTAGCTCGCTCCACATCGCATCCACATTCTACGCAGCTCCACAGGTTAATCATTAACCAAGGTTTCCACACTAGGGATGCCAGGTGCCCTGGGCAACTTTCATGGC	300	FastSeqProp (G)	5.33549	0.175317	0.0259975
gosai_28842	GACTCTTCCACCTGTGAACGGCGGGCCGAAGTCTGGTGCCTGTTGGCAGGTACACGAGCCAAGTTGGAGCCTTCAGTACAAACAAGGGCCCTTTGTTCAGAGGAGATGACATTCGCTAGATGGTAAAGTCTTAATGAACAAAGGGTGGTTTAGAGAACAGAGTTAACCTTTAACCCAATAGGCAAGGGTAATGTTTAAAC	300	FastSeqProp (G)	5.02759	0.187898	0.398571
gosai_32880	CCCAGGTGCAGTGCCCCACTGCGAACGATCTTGGAGGCCAACTATGACGGCCGGGCAGAGGCAAAACGCCCTTGAGTGCCAACATCGTTAATCATTAACAAGGCCAATGTCCCAACCGAGTGCGCGGGGACCCCCCCGACACCATTCGCTTTCTGTAAAGCTTCGAGAGCACATACCTGTCCGGTAAATCACTGCATGTT	300	FastSeqProp (G)	4.63375	0.140594	0.152359
gosai_25845	CGGGCTCGTGCCCTGGTTAATGATTAACCAGGTCCATGTGCCAATAGCTACGTGTAATGATTGAATTGTTGCCATCCGTGCCAAGCTCCAGGTTCCAAAGTCCAGTGAGCAAGGCTTCTGGGACAACATGACTGCAAAGGTATCCGTATTTAAAGGTATGAACAACTCATGGGTACCAAATGCTAGGTGCCCAGGTGGTA	300	FastSeqProp (G)	4.57423	0.164051	0.105429
gosai_32207	GGGCGCAAGCGAGATTATAACGCTTATACGATTAGCATGACCCAGAACAAAGCGTGCATTGTTTGCTCAATTGATGTACTGTCGGGACTACAACTAGGGCCCAAGGTCAATATTGATCCAAGGAAATCATTCATCCCATTGCGTACACAATGGTTAATAAATTGTTCATGCAGGTCATGCGCATTTATTGACAGGTAGGC	300	FastSeqProp (G)	3.55235	-0.0930613	0.0789692
gosai_30299	ATGAGCGGGCACTGTAGGTTGCACACCTGTAATCGGTGCCTTTGGGTGTGGTGCGCGAAGGCATGCTCGCTAATGTTTGCCCAAGGCTAGATTCGTTTTGTGGATCAAAGGGGCATTGTGTACCCTATGTTTACGCAATCTCAGTTCCAGTATAGGGTGATTAAGCCTGGGCAAACATTGATCAAGTGTAGCAATAATCA	300	FastSeqProp (G)	3.53775	-0.113598	0.472246
gosai_27280	CCCAGTTTCCTATTCGATGGAAAATGTCCGACTATTACGCTGCGCGCACCCGACTCGTACAGTAGTTAATAATTAACTCGGACCGCCACGATCATGTACAGGTTCGCTCTGGATCTTGATTTTGGACTAAATGGAACATATTCCAGTACTAGTTAATTAACAACTAGCACCCCGTTCATAAAGTCTATACAATTGGATGG	300	FastSeqProp (G)	3.4084	0.148442	0.257892
gosai_32512	ACGGGCCGGGACTTCGAGTCATGAAACCATCGGTGATCTATTAAAAGCTCTAATACCAGGCAGTGATTTGTGCATGTGACCTTGACCCCTTGAGCCGAGGCCGTCACGGGGGTCAAGGTCAATTTCAACTGTTTGTATTAGGACATAAATAACCTTTAGCCCTGTGCTCCTAGACTTGTCGCGGCAGTTAAGCTGGTGGA	300	FastSeqProp (G)	3.4901	0.160265	0.279367
gosai_32756	GCATAGGTCCCGTGCCCCGGAGGACCCGGGAGGACCGCCATCAACCATACCGGCTTGTTGTACCAAACTACAGTCCCGTTGCCACCCCTAGCTTGTTAATAATTTACAGGTATGCCTCTGACCGCGCTTGGTCCACACAATGGCCCCATTGTACTGGTACTGACTGTGCCCTCAGTGTTCCGAGTGGTCGTTTCGCCTTT	300	FastSeqProp (G)	4.39368	0.148016	0.260938
gosai_30446	ATCGAGTTCAATACTGCAGGATCAAAGGGCCCATTGTGAAACCTGTGCCCAGCCCGCTGTGTACACAGGACCTGAGCCCATAGAGAGAGATCAAAGGGCCCTTTGTTCACTCATCCACTGGGGCTCGGTTAAAACTCACGGGCGCATCAAGCTCTGCAGGTGCACCATCGCCAAATCCATGCCTAGATCTCGAATATTTA	300	FastSeqProp (G)	3.55868	0.0266122	0.380156
gosai_30333	CAACATTAATGAAGACTGGCGTTCAATCACTGCAGGTGTAACACAGAAAAACCGTCTTCACTTCAGATCATTAGAATCTGTGATTAACCATGACCTTCCAAGGCGTGGCACTGTGTACACAAGGGCACTGTGCAACCAGTGTTTGCCAAGGTCAAAGGTTCCTTTGTGTGCCACGAGAGCTACAAGTCTAGGGACTCGGG	300	FastSeqProp (G)	4.3132	0.152553	0.253623
gosai_32044	GTTGGGCATGGCCGGCTGTCGGTGCGAGCTTGGCGACCCGGTTGCCGGGCGCCCTTGGTAAATATTTTCCTAGGCAAATATCTACATAAAGGCTAGTCTGCTCTTTGCCCACCGGTGTCTCTGATCTCCGTTTGCCGCGTCGGTCAAGGCAACAAAGAAGTCATTGTTTACCTGTGCAAATACCCGTTAGGATGGGTAAA	300	FastSeqProp (G)	4.24636	0.161435	0.216939
gosai_26730	GCTCGCGACACTGGGGGCCAGGTTTCAAGCATTCATGAGACTATCCATGGTCCAAAGTCCAAACGTTGTACGCTCCAAAGAGCTTAGATGCTGTGTATATAGTGTTCCGAGTATTGCATGTACAAGGGTCCAAAGTCCAGTACTAAGATGGTCATTGTTAGGTTTCCATCTACATTTGGTAAATAGTCCAAAGTCCATTC	300	FastSeqProp (G)	4.38869	0.26606	0.398213
gosai_25491	ATCGAGGCTCGCCTAATATCTAGGCAGAGTCCTTTGTCTTATTTGTGCCAGGTGCGGTGACGTTCTTATGGAAGGCACAAGTGCCCTTTGTACCCATCTTGTGTACCTTGGACTTTGTGCTCGAGGATCTGGATACACAAAGACCAAAGTGCAGGTTCATATACAATGGTTGTTCAAACCTTAACCTAAGGGTCTATTGA	300	FastSeqProp (G)	3.99656	0.0649218	0.199857
gosai_27413	CAATCACGGCAGCCGTACGCCTACTCGCAAGATCTTGGCTCTCACCTGACCCCTGTGACGGTTTGGCGGAGCACCAGGACACCTGGGCCCAAGAATAAACATGGAATGTTGGAGGGCCTGCTGAGCCATATTGATTCAAGGCCCGTTCAAGGTCACATTCCTGTGTACATACCTATTTGACCAGTGTGGCCTTGAACAAA	300	FastSeqProp (G)	3.74724	0.154293	0.114099
gosai_27411	CACCTACTAGCTTAGTCGTAGTCATACGCTGGGACATAGGTGTGCACAAGCCCTCTCCACCGTTTTGTGGGCTCTCTGGTTGCACGTCAACGCAGCCCCAGAACAATAAAGCCATTGTGTATCAAGGTCACCCTGCCGTGTTTGTGAGCAAGCAAGGGGGTCAAGGTCATTTCAGTCGTTGTATGTAGATTTTTTTAGTC	300	FastSeqProp (G)	4.07984	0.120435	0.223208
gosai_27520	CAATAGAGCGAACAACTGAATTCTCCGGCCGTCTCGAACGGGATAGCTTGTTCACCTGTGGTGAAGTGCAGTGATTTCCTCTCTGACGGAAAGTCCGCATGGATACGTAGGTAACGTAAGTCGTCGCTCGCTAAATACTCCTGTGCGTCAACGGCCCGGTTAACCATTTACCTGTTGGAGCAACGCACCCCACACCGGCA	300	FastSeqProp (G)	4.21497	0.260642	0.196245
gosai_30897	TGTCTCCCCGTAGGTCCTTGCCCTTACCTCGGTTTCGGCAGATTCACATTACCTGCCTTTTGCTACGAGGTCTAGTTAAAATTTAACCAGGACCCGGACCAAACCCGTCCAAGGTTATATTACCCCGGTTATATACCATCCGCTAATTGAGTGAAAATCGCGGTTGTGTAGCTTGTATACTTAGCTTACCAACTGAAGGC	300	FastSeqProp (G)	3.81192	0.193549	0.139096
gosai_32110	GGCCACCGCCTAGCAAAAGAGCCGTCTGCTCCTGAGCGACGGATTCGCACAGGTGCGCTCGCCACACAGGTGCTCCTAGATCAAAGGGTCAAGGTCGCCTGCTGTGATTTAAGGTGGCGAACATTGCAACGCCCTTAGTTAGTGGCCTGCAAGGTAAATATTTACTTAGGGTAAGTAAACTAACCCTGTGCCAAAATTTA	300	FastSeqProp (G)	3.07492	0.0242234	-0.840362
gosai_28359	GGCGCGCGGTACGTCGGGCCGGAATGGGATGGATCGCCCCAGCACTGGAACACTTCCCACCCAATTGACCCCCTTAGTTAAATGCCTCGACTCTGTGATATTAGGACAAGAAAGGGTCTGACACTGGGGCCCTTTGTTTGCCCAAGTGTAGCCTAAGTCAATATTTGCTCAACACCAGGCCAAGGTAAATATTGAGCAAA	300	FastSeqProp (G)	3.68718	0.191913	0.268317
gosai_25333	GGCACCTTTACCTGTCAATCTACATATGCCCGCCAGCGACGTGCCCAGTGCCGAACACGGTTAACTAATAGACATTAACTTGGTTATTTATTAACCAAGGTCGAGTAGGAAGGTACGTAAATGAATTGTTAATAGATGGGCACCTCGGTTAATCATTAAACTGGTGGTAAATGATGCCCTGATGAATCTATGTACCTGTA	300	FastSeqProp (G)	5.3143	-0.225413	-0.127203
gosai_28191	TGATTGTGCCAGGGTCCAAAGTCCAAAGTCCAGATTGATAGCTGCTTGGACTTTGGATTTTGGGCCGTCTTGATCCTTCTACCAAGGGTCTAAAGTCCGCTAGAACGGGTTGTGTTTCTCCTGAACAAAGTTCTATTGTATCATGATCCTTGACCCAAACGTCCACACCTGTGCCCAAAATCCCAGGATAGGGCTGTTGG	300	FastSeqProp (G)	1.93616	0.0957485	-0.47554
gosai_29523	GACTGTGGACTTTGTACTGGCACCACAGGTCAAACAATAGGGCGATGTACAAAGTCCACCTTTGGACTTTGTACCATCATAACAGTAATAGAGATTACCCAGCTGCTTGTTGCCAAGAAATGGTACTGAGGGGAGTGTCTCATCAGCAACGGGTGGCTCAGGGACCAAAGTCCATAGTACCCTCAAGACCTTTCATTGAC	300	FastSeqProp (G)	2.59413	0.0578761	0.373104
gosai_30784	TACGGGTACGTCGGCCTGCGGATCTATTGGACGAACCTGAGTAAGGTGCCTGGATGAAGTAGTGTGAGCGTCCGGCTCGTACTGGAGACGGCCGGTGAGGCTGGGGTACCTATGCTCGACCCCCTGCAGGTAGTCCCTAAACACAAAGGCCCATTGTGTAAGACCGTTGAGTTCCAAGTTGGTAAATCATTACTCACTAG	300	FastSeqProp (G)	2.36092	0.0290092	-0.190331
gosai_30761	CAACCGTGTACCCTCAACGTCATAGCACCTGGTTATGTAACCAGGTGCCAAAGTCCAGTTTTCCAAGGTTACACAACCCCAATTTTTCCTATGTGAATTGTTTGCACGGATGTAGTGGGCACTGTAATAAATTTGATTAACAAAGGTCAGGATTACACCAGGTTATGTAACCTGTCGCAATAGAAAGACTATGGGATGAG	300	FastSeqProp (G)	3.44748	0.168541	0.135806
gosai_24677	GGTACCAATACGGTGTCGCCCATCTTAGCTGTCGCTTGCCAATTAGGCGTTGCAAGCTTAATACACATTAAACGCAGGGGCAACTCAACAGGTCCCTACAATGGGCCCTTTGTGTACCCATTCTAAAACTCCTTAAGGCAAGATGGACTTTGGACCCTTACCAGTCTCGCAGTCCGGAATGGTCCAAAGTCCACTTTGCA	300	FastSeqProp (G)	2.80641	-0.00905947	0.212907
gosai_32008	GGCGGGTACACTCGACCCCCAGAAACGATTCACCTTGAGCCCTGGTGCTAGCCCCCCAGTGGGAAGAGTACAAAGGATTGCAAGAATCCGTGTGTACGTTTTACCCACAGTATTCCCGTAACACAAAGGGCCCTTTGATCTAGTGGTTTACAAATCCCTATGTACACATCGTTGACATGAACACCGTCGACCAAGATTTA	300	FastSeqProp (G)	2.79825	-0.0409777	0.41278
gosai_29328	GGCCGGTCCGGTCGCTTGGCACACAAACCCACGCTTAGCCCTCGGGCCCGAAATCTCGTGTTCCAGTTGCAGGATGCCCAATACACCGGGTCGCGCGCGGCCGCCACCGTGTTTGTTTGCTTAGCCATTGTCATGCCCCAGAACAAATAGACCATTGTGTAACAGTAGTCAACCTGCCCCGAGTGCGTACCTGCCCGCAG	300	FastSeqProp (G)	2.84899	-0.0565201	0.0436421
gosai_26591	GGTCCAAAGATCAAAGTCTAATTAACCCAAAGTCCAAAGTCCAGTGTGCCTCATGGACTTTAGAACCATCTCACACAAAGGATGGGTACTCTTAGCAGAGTACAAAGGGTCCTTTTGGCTCCTAACTCTCCTTCGCAGGGTAATGATGGCCTTTGTACCCCCATCAGTACGTGCGCGATGGTGAGATTGGACTTTGTACC	300	FastSeqProp (G)	2.6635	0.0371906	0.21591
gosai_27283	TACAGGTGCACCTTGGTACTGCATCCTGAGCCGCCGGAGAAATGATGCGGGGACCCGGCCGCAAACAAAGGCTTCTTTGTTCATCCACGTAGCACGCTTTCACTAGACAAGGTTGCTGCTACTCTGCGAACACGGTCTTATGCGGGTCCAAGGGTCACATTCCCGAGTATGTACACCTGGGCACATGTGTCACTCTGTCG	300	FastSeqProp (G)	3.54429	0.0394182	0.185339
gosai_31215	CAATCTGAACCTAGTTGAACTTTAACCAGGACCGTGACCAGGTGTCGAGTTTATAGCTAACGTGGTCTGCAGAACCTGGGGGTGGGCTCTGGATGGATCGGGCACTCAAAGCGGCGGAGGAGTCCCCTGCAATACCGGCGTCTGCGAGCCAGTATTACAGGTGGTCATACTATCCGGGACGAACAGCGTCCGGAGGGGTA	300	FastSeqProp (G)	2.60351	0.0518174	0.163738
gosai_27898	TACAATGGTTCAAAGTGCATTTAGTTTTGCCTGCCACAGTTTTCGTTCGAATGGTTGCTCGAAGTAGATCTGGGACAAGGGACCAAAGTCCGCTTTGTACTCATCTAATACAAGCTCGCATGCACTATCATATTAGCTATTACAAAGTGGGCCTATTGTTCACTACTCCAATGCCAAGTCCGGATAGTGGGTACAAAGTC	300	FastSeqProp (G)	3.05479	-0.0429804	0.261828
gosai_27334	CGTGACGCGGCCATCGAAGCATAATGTGTGTATGGGTACAACGAGGGATATTGCTGGTCCGGATTTCCTCACACAAAGGGCTTTGTTTGTTCTATTAAGAATTCTGTTATCTCATAATGTCCTTGACCTTGAACAATGGATCCATTGTTAAGCAACGCTGTATGGCACACCTGTGCCGAGGATCACATTGTTGACTCTGC	300	FastSeqProp (G)	2.22121	0.111194	0.303474
gosai_29036	CATTCTATGGGTTGTTAATCCGCATATCGTTCACACTCATGGTGGCGTGCCTCCAAAACCAAGGGGGCAGCGAATTGTACTATCTGGCGAACGCCGCACATCGGGACGGTTGGAATACACCTGCCCTACCGTCACCTAACTAAGGCCTTACATAACCGGGCCACTGTGATTTCCGGAAAGCCGCGTTGGGGCGGCTAGAC	300	FastSeqProp (G)	1.6124	0.0199766	0.0480637
gosai_32060	TCGGTATCATTTATGTGCCCTGAGTAAATATTTGCTTATGCAGGGTGCCTAGAGCGTTGCCCAGGTGCATGGCACGGATACGTAGCTCAACTCAAAGTCTCTCTCGGGCTGGGGGGCCCCATCCCAAAGGTTACACAATGGTTGCTTTGTGCAAAACATCCACTATGTACACAATGGGCGCATAGTAAACCCAATATTTA	300	FastSeqProp (G)	2.95606	-0.060856	0.151592
gosai_26890	GGCGCTTTGTACACATAGTTATACAACCTTGACCTTGAACCCATGCCATCATATCCCTAATGTTTTCGCCTGGCGCCTAGGTAAAGATTGACTAACGTTGTAGATCCGATAGATCAATAGTCAATGGTTTACAAAGGATTTGTTTGCCCAACCGTGCCAGCGCTCATGGGCCCAGTGGCCAACCACCCGTTTCCATTGGG	300	FastSeqProp (G)	3.15074	0.148499	-0.0134593
gosai_28985	CGATACCTCGACTAACGGGCCACGACTAGAGACAAAGTGACCCAGTGAAAATTCGAGGCCTGGCAACGGATTATAATAGGACCTCTTCCTTGAAAAGGTCATCCCAGAACAAACACACCCTTTGTTCCGGCAACCTTGCGCATTGACCTTGACCCGATACGCTCGCAGAACCTACAGGTGAAGGTCACGTCCGTGTGAAA	300	FastSeqProp (G)	3.01375	0.0626226	0.0545378
gosai_30426	GCTAAACGGCTAGACCCATGCAGATATTCACCCGCTAACCCAGCCTAGATCAAAGGGGCATTGTACAAACATGGACTTCATCCAAAGGTTTTCGCAAAGGTCGTATCAAAGGCACAATTGCTAACAGTGTTGACAAATCCTATTTACACCATGGCCCCTTTGATCCAAGAGCCCATTGTCCCGAAAACCATGGATGTTTA	300	FastSeqProp (G)	1.47833	0.126991	0.0943186
gosai_26727	GACTTTGAACCCTTGATTCCAATGTTTGCCCACTCGAGGATCTCGCTACCGTAAGTTAGAGGCAGGTACAAGATAAGATCAAAATGGACTTTGGACTTTCGACCCAGATTGATTTCCCTATACCGGGAGTGCAATGAGGCAATTTGTACATGCATCGGAGAGCATTAGGACCGGCCCTGGTACAGGTGCCCACGGTGGCC	300	FastSeqProp (G)	3.35655	0.187583	-0.0190674
gosai_27689	GCATGCGGACCCGCCGCCTCCAATTAGCGGAATCCGCTGTCCTTTTATTGCAGTGATTTTGCCATTTTGCTGGACATACAATTGTTTGTTCAAGTGAGGATTGACCATGTGCGTGATGACAAGCCACTCTCTGCGCAGAACAAACAAAGAGCCTTTGTACGTGAGCTCACCTGTTTTCAGTGAATCGTCCCAACGACAAA	300	FastSeqProp (G)	1.97585	0.146807	0.361785
gosai_32459	CAGGTGCACATGGTAGCCCGGCTTGGTACCACCTTTGATCTCCTCGGAGATATCGGATTTGTGGCGTCAATGTTTAGATATCCTAAGATCAAAGGGCTCCTTTGTGCAAGCCTGACAAAACATGTTAAAAGTCAAGGATCAAAGGGCCCATTGTCCTTTGCCCCCTTGGCAACTTTTCACGTCGTTGATGGACTTGAAGC	300	FastSeqProp (G)	3.14091	0.0889906	0.0650169
gosai_27210	CGCACAATGGTCCCTTTGATCTGAGCCACCTAGCAGCATAATAACGGACCAAAGATCAAAGGCCTTGGATCACAGACCCGCACAAAGTCCTTTGATCTGTCGGAGCCGTGGTGTGCTGGCTTAATAGCCAAGAGATGATGTACCGGCAAGAAACGGGCATTCCAAATTTGCGACCCAGCAATGGACCAAGTGCCCTTATA	300	FastSeqProp (G)	1.84403	0.0536892	-0.103599
gosai_25890	CTTCGCGGAAAGACACTCAGATTTGCACCTGTCCTCCAGGTCGACACGCCCGTCCCGGCTCAGTGTCTGTCGGTCCTATTGATAGGATGATAGAGCCCTTGATCAAAGTGCCCTTTGTACCATGTGTACTCATATCGATCTAGATTGCGCGAACGTGGGTACAAAGGCCTATTGTTTAATCCATCAATGAGTTCAAAGTC	300	FastSeqProp (G)	3.28371	0.0935091	0.176721
gosai_24383	GACATCACCGTTGGCACTAAAGAGGAACACAATGGGGTGCCGTCCTGGTTAATGATTAACCAGGTCGGAGATTTCTCCCAAAGGCGCTCCCTAATGATTCCTCGAAATTGAGGGCTAATTCCACTATCTTCGGCCAGACCAATACAGGTGCAAGGTTCTAAGTCCAGTTAGGTATATCTAGTACACCTGTTCAATCTGTG	300	FastSeqProp (G)	2.19241	0.00260443	-0.847306
gosai_32186	AACTTTGACCCCGGGGCGGTTTCACCTAGTCAATGTTTACCAAATCAAAGACACCCTTTCGCCGCGGCTGTGGAAGGTAAACAGGATGGGTAATTATTGGGGCTCATCAATCACTGGTGGAAGTGGTCCGTGTTGGCCTTGGGCCCCTTGGCTGACGGGGTGGCACGCACTTCCCAATATAGGCTGAAGTTAGCCGTGGG	300	FastSeqProp (G)	1.66575	0.192286	0.191656
gosai_32787	TGCGGAGATCTGCCAGTACGTGGCTTAAAGTAGTTGATTGCTAGCTAGACTTAGCACAGAAGGCGCCGAAGCGTTTCCCCTCGACCCCCCACACAAGGCCCATACTGGTGCCATCAAAGGCTCGACTAAGCAATAACAAAAGGGCCCATTGTGTAACCCCTCAGGTACGTACACAAACGACGCACACTCCGATTACCGTA	300	FastSeqProp (G)	1.65084	0.0633119	0.323972
gosai_25204	GGACACCTGCTCAACTTTGGACTCTCTCAATCTGCCACCTTGGACTTTGGACCCAGATTTAGAGCGCGTTTGCACCAAGGGTCCCAAGTCCAGGGGTGTATAAAAGATTGCATAGGACTAACTCTAGCAAGGGTCCAAAGTCCATATACCAGTGGTTACACAATGGCACTAGGTACATCGTCCATATATACCTGTATGTT	300	FastSeqProp (G)	2.71201	0.12404	-0.0975507
gosai_27618	TGATTTCTGCCGGAGGTGAGTCTCAGCCGGGGATCGCCGATCTACACTCGGCGTCCAATATGCGTTAGAAGTCACAGTGTGTATGTATACCTGGTTGAGAGGTTAGGTCACCCCTTGCGCAAAGCAAACACGGACTCACCTGTTTGTTCAACTCCGAGTCCGGCCATGTATCGGACCATGGTCGAGCGACGGTGAATGGC	300	FastSeqProp (G)	1.99092	0.17863	-0.113982
gosai_25883	CAGGTAAATCTCTGCCACGCGCTCCGCGTCCACCGGGTTGCCAATCCCTGCGAATGATGGAATAGAATGATTTTCCTTTGAGAAGATTGACCCAAGTTAAGATGTCCCTCGAGTAAGTAGGGTCCAAAGTTCACCCAGACCAAAGTCCAGTCTGCGTCGAATATGATGCTGGGCCAAGGTACAAAGTCCACATAGTTGTG	300	FastSeqProp (G)	1.55195	0.267862	0.227756
gosai_29782	GTAGCCGGGCCGTCTAGAGCCGGACTACGTACTTGCCACCTTGGGGGGAATGAACTGCAGTGATTGCAAAGGATGGCAATCTCTGCTACTCAGGTTCAAAGTCCATTGTCTTAGTCTATATTTACCTTGACCGCTCATCGCTTCACATAGATCTCCTCAGTCCAAAGGACTTCTGGTTGTGTGATTCAGGGGTCAAAGTG	300	FastSeqProp (G)	4.85278	-0.0742851	0.0152771
gosai_26024	GGCTAGCGTAACCTGCAGGTCCACCTGCGCGATCGGCATGCACTGCTTGGTTTGCGAGAGTGGGCAGCGGGGATGAATCGCACTCGGAAAGGCTTTCGACCGGATATCAAAGTCTCATGGGGGGATTTGACGCCTGGTTAAACCTTAACCAAAGGGCCTTTTGTGTACCCGGTTAAATAACCTGGGAAGGTGTGCTTGTG	300	FastSeqProp (G)	4.7436	-0.102558	0.0327313
gosai_32825	CGTACGAGATTTGGAAAAACTTGCCAATTTGGTAAGCGTAGGCCATACCCCCTTTTGTGTCGAGCAGTGATTGATCCGCGCAGGTGTTCCTATAAACACACGGTGTATTCCGCCGATCGTCCCACGTCACTCACCTGTGGGGCCCGTGTCCATAACAAAGGGCCCATTGTTCAACACTGTATACATGCAGACTTTATTTA	300	FastSeqProp (G)	1.59719	-0.057854	-0.0102178
gosai_24892	GCATGAGGACACGACAGGTGCACCTGCGTTTCATGAGTGCACTGCACAGATTTCCTATGGCGACAATCTGGTAAATCATTAACGAAGGGCGCAAGACGTAATTGCAGGATTAGAAGCGGCAAGTAGCCCGATGGCCCCCTGGTCCATAGTCCAGGTATAGTCCCGGCCGCACGCAAGTTAGTACAGCAAAGTTCAAAGTC	300	FastSeqProp (G)	4.72589	-0.170861	-0.132961
gosai_7363	GCATAAACTTGCATGTACCTGCTCAAGTTAGGGCGTTAATTCTTCGACGCGCCCGCCAATTCTTGGAAAAAGGCGGCGCCCAAAACCTGCAGCAGGATGTACGATAAGACTCTAGGGTGACCCTGTCAGATATAGCTGAGTCAACCGTTGACAGCCTGTCAACCGCTTGAGCACATCTTCTGTAGCTGTCGACGGTACTA	030	Simulated_Annealing (G)	0.0848466	5.19383	0.38451
gosai_5347	GCTGTATGCCCTGATAAGGCGACAGTCGCGGAGCATGCATATGACTGCTACTCGTAGATAAGTATACAGTCAATGACTAAGACCGTTTCTTAGCCCCGAGTTCTTGGAATCGACGCGATCCTCATCAGTCACACCAGTGTGGCAAGCTTGACACACCTTCCCGCGACGAGACTTGTTGCCGTCTTGGCTCACACGTGCCT	030	Simulated_Annealing (G)	0.33924	5.16622	1.26536
gosai_4468	GCGAGCGGCGAGGGCCGGGCGCTCGACACATGCATAATGTCTAGCCGTCGAGGTGCGCATGGTGGTTGCTGATTCCAAGAAGTCTTATCTTGAAGCCCCAGATGTTTCTCGAAAGCCCCCAAACATTAGTCATCCTTGAGACAGGCCCCAACCGATGTGAAACCGTTATCGGGTTCACACCTGTCAGGAGCGGGTGTTAT	030	Simulated_Annealing (G)	0.350197	5.38283	0.0389325
gosai_7765	GCTACTGATGTTGGATTAAGATCTTGCGCTGTCAAATCAGCATCATATTCCACGCTCGACAGAGGCTGGTCCTTATCGGTTTAGACAGATGCAGAGCCGTCCAAGATGAGTCATTACTTTCTAGGAATGAGCCTAGTATCACGAAGTCAAACCTGTGCTGCAACGCGCCACATGGGACTTTATCGCGCCTTTGCAGAATG	030	Simulated_Annealing (G)	0.412373	5.23811	0.893592
gosai_4499	GGCGGGAAAGAGTGGTTGTGCGGCAGATGCTTCCTTATCAGCCGTGGCCACATGTATCCGTCGAGCTCTGAGTAGATAACGTTATGCACAGACAGTGCTTCCCTTGGACTAGATGTCAACAGAGCATAGCAATGAGTCTTACTTCTAAGAACCACACGCCTTCTGGTGGTATTTGGCGCGCCGTCGATATGCGACGGGGT	030	Simulated_Annealing (G)	0.251586	5.04741	0.864299
gosai_6903	CGAGCCGTCGAAGCGACACGCCCCATCTGTCGTTACACACCTTGCTGCGGGTTTCCCGCCAAAATCTTGTATCATGGCCCACGTAACATGTGTCTACCAGATAAGGTGTATTCCAAGAAAAATGACTCATTGTCAGCCGTAGATAGCAGACGCGGGAGGTTCTTGGAATTGTCAAGAGCCTTCTTCTGTTCACACCTTAC	030	Simulated_Annealing (G)	0.578932	5.21795	1.25429
gosai_4933	ACCTGGCCTGCCGCAAGACGGCGCGCAACGCTCTTCGCGCCTCAACTGTCAAATTCCTATCGCTATGGTGACAGCTGGATAGTAGATAAGATGCTCATTAGGTCATTTCTAGGAACCCTCGACGTCTCGTTAGTAACTGACAGTAGCATTTTCGCGCCTTTGGTGTTATCGCAGAAGGCACACTCAACCGACAGCTAAAG	030	Simulated_Annealing (G)	0.229735	5.12403	0.669035
gosai_4295	CAACAGGTGCGGCTGTCCATCGCACGTGCAACATGTGCTGGCTTGATAAAGTATAGCAGATGTCTGCACAAAGCTGATAACGCTATGAACCAGGGGAGGGAGGCTACTTGGTTAGTACGAGCTGACGAGGAGGCTCCGTCGAGGAGTCATTCGCGCGCAACCGTCGAGGATGCTCCATCTGGCTCACGGAGATAAGAGCT	030	Simulated_Annealing (G)	0.138963	4.89905	0.716028
gosai_5173	CTACCCACTTGGGGTAGCCCATACTGCGGAGCTTTCCAGGAAACCTGCTCACCTTCTAGGAAATAATCGACGGCAACTGTCAAGGGATGACTCAGGCGGTATCAGACGTTAGCAGTTTTGGCGGGCGTGTGGCTGGGTGGCTGTCCACCGTAGCATATCTTGACTTTCCCGCCATAATCTAGATAACCCTAGACGGCTCG	030	Simulated_Annealing (G)	0.607946	5.10188	0.974957
gosai_7089	TGCTGTCAAGGTGACAATGCTATCAAGGCGCGAACTTAGAGCAGGGCTCCCCTTATCACGACTTGCACATGTGTACGAGCCGTCGAAGATACTATTAGTCATCTTCCCATCGGGGAGCTTTTCATGTTCCAAGAAATGATGACCCATACCAGATCCCTTTTCTAAGAAGAGGTCTTGAAGGCACCACATGGGCCATTTGA	030	Simulated_Annealing (G)	-0.105064	4.69809	0.709733
gosai_4512	CTTGACAGCTGAACCCGACGGCCGCCGTCTGGTTAGTCAGATAACTTGACCGTTTCCAAGAAGTCAGATAAGAACAGTGCCATAGTTATGGGGTGAGCTTTCCGACGCGTGATATCTTGTGTCTAAGTTCACACTAGAAGTCGTGACAATGAGTCACGGGGTTCGACGTGTATAGACTTATAATCTTGACATGTGGATGT	030	Simulated_Annealing (G)	0.796007	5.18806	1.5712
gosai_4367	GTTATTCGACGGGTGAGATATGGTACTGTAAGATAAGCGCGATGACTCACCTACTAGGTAACACGTTTTCCGATTTCCAAGAAACTACACCTCGACGGTTTTCGCTCCCTTATCAACACCAAGTCAGCTCGTCTAAGTAGGCTTTCGCGCCTTATGGTGCGCTGAGATAAGACATCTGGTCCCTCAACCTAAATGGATCT	030	Simulated_Annealing (G)	0.233671	5.27671	0.398611
gosai_6115	TCGAGGTTAACTACGATAAGCCGCGTTTCCCGCCAAAAGCGCCAGCCGTCGAGCTTTATCTTAGCGAGCCACTGTAGCAAGGTTCCATATCTTAACTGGGTGTGCATTCCTAGAAACGGGAACAGGTCTTAAGAAGTGTCTAGTCATGACTCTTAGTAACTCCTAGAGCCGTCTAGGATACCTTCGCGCGGTAGCTTTGA	030	Simulated_Annealing (G)	0.810536	5.13044	1.53228
gosai_7978	CCGTCGAAAACCCACGCCCAACTTTTATCAACACTCGACAGCTGCGGCGTCTAGATAACAGTTATGACTCTGCAAGTTCGAGCGTCGAAGTGAGAGGGTTGACTGAACAACTAACACATCATTCTGAGGAACCAATTTGAGGTCTAATAGAGGGCTTGACACTTCTTTTGCGCGCTATATTCGACGGCCCGCGCACCTAA	030	Simulated_Annealing (G)	0.150011	5.15419	0.419775
gosai_5508	TCCCACAACCACAAGTCTAAGATGCTATGCCAAGGCGTCATTATAAGGGTTTTTGGCGCGCAATTCCCATCTGTACACGGGCTAGTAAGATTCTTAGAACTACCCCCTGAGTTGACTAACTGCTTCTTGGAAATTGGGTGCTGCATAGTTGATAACCACACCTTATCACAACATGACAGCCTGTCATATCACCGACGGGT	030	Simulated_Annealing (G)	-0.0556318	5.29193	0.0987673
gosai_5430	CCTCGTTTGACGTTCGACACCTGTCAAGCACATGCTGGTTCAGGTGTGACATCGGGACCAGCGGCATTCTAACACAGTCCTGACTTTTCAGGACTGTCCACTTTGGCCGAGCCTTATCTCTGGGACGCACATTGTGTTTCTCAGAAATGCGGTTACTAGACATTCTTAGAACTGTCACAGCTGTCAAGCTTGATATTAGC	030	Simulated_Annealing (G)	0.362844	5.38674	-0.224695
gosai_5997	CGTCGAGTGTGCTCGACGGTGGAACGAGAGTGCTGCGTATCCAAGGAGCGTAGGTACTCACAGACTGTCAAGGGTGTTGACTGATAACCATCTGAACTTATCAGAGCAGAGCAGACGTTCTAAGTAGCAATTCTAAGAAGTAGCCGTCGAGGTTCCCGCCAAGCGTGACAAGTTCTTCGAATTTACCTTATCTGTACCAT	030	Simulated_Annealing (G)	0.431414	5.30207	0.47863
gosai_6388	TCGTGTCATGAGATATGGTAGCACACCTTTTCGCGCGTTAAAATCTGCAGGTGACTATATCTCTCCATAGAGAGCTGTCAGACATCCCGCCTAACGACTATATTGACGTGACTTCTTAAGTCTTATCTTCCTACACCACACAAGGACAGATGTTTATCAGCTGTCAAAATGACTTGACACTTCCAAGAATTAGTCGTAGG	030	Simulated_Annealing (G)	0.298014	5.34415	-0.127479
gosai_5786	TCTTCAATACCCACTTATGGTACACTAGCTGTCAGTTGGCGACGGTAACAAATGTTAGTTCGCAAGACTGCTAACCCTTCAACCAAGAACATATGCACATAGAGATAATAGTCCACACCCCCCTCTAATCTCTATGGAACAGACGTATTCCCAATGCAGCAGCCTTCGGGCAGTTCTTGACACCTCAAGAGCGCGGGAAA	030	Simulated_Annealing (G)	-0.01781	5.32355	-0.362121
gosai_4962	TCTGGTGCGATGCGATAACACTTTCCCGCCACTGGGGCATCTGTAGCAACTGATAGCCTATTTCAATGGAGGGAACTGTGAAGTCGTCTAACAGACCGCAGACAGTTATCATTAGGGTCCAGCTGGTTCGCCGTACCTTATCTTATGAGAACACACCTTTGCTCATGTCAATGTCTAAGATGCTCCCGCCAAAAATGGGA	030	Simulated_Annealing (G)	0.042342	5.08764	-0.334067
gosai_5135	TGCGCGAACGTCGAGAACATTTGCCACTGCTTGACAGCTAACTGTCAAGGGTTCATGCATAGCGTTTCCCGCCAAATAGAATACCCACTACTAAACGGTTTTCCCGCTCTGTAGAGTCGACGGGTGAAGTGCAACCAGTTTATCTCCATACAAAGAGTTCCTAGAAAGCTCTTATCTATTAGTGCCAGAAACCCTAGTCA	030	Simulated_Annealing (G)	0.129309	5.15359	-0.422252
gosai_5621	CCTCGGGCCATGTGAAAAGCATTCGACGACCTGTCAGGCGCGTGTCAGACCAAAAGCCTTATCAGTAGCATCCACACGAAAGTGACATTGCTATATCACCTCCCTCAAACTGACTCATAAGACCGGGTGGTATCATTTCCAAGAAACACCCTATTAGTATCCCCAGACAAATGTCTATTATTGGCAAGGTGTTGAGTCCT	030	Simulated_Annealing (G)	0.0500535	5.09029	-0.20965
gosai_6371	CCAACGTCTAAGAATGGCCCAAGGAGCCGTCAAACTCGCACGACAGCCTTATCTTTCTACAGCAGATGGTCCCAAATGTAAGTTCAATACTAGCCCTAAGGCGCCTAGAGTAGTACTCAAATGTGCGCCTGTACGACGGTCCACATCTGCTTATCAGAGCACTGCACCACTCAAGGTGTTATCTTCGAAGCCATGCACTA	030	Simulated_Annealing (G)	0.0583466	5.00567	-0.355301
gosai_5659	CCTCGGTGATGCTTCCCACGACAGAGCATCAGTCTCTACATCATTGAAATGACAAAGATGCGAGCACCCCTATAAAGTTCTAGTATATCACTATATCACTTCCAAAACATTTGGCTGTCAAGAGGCTAGCTTATCAAGGTTCAGCACGCGCCTTTTTGTGATAGTTGACAGCACCAAACTTTATCTCAGCTGTGCAGACG	030	Simulated_Annealing (G)	0.00510673	4.98323	-0.401192
gosai_6995	TTATCAGCCTCACCAGACGCACTCTCTGACAGCTTTGTGCCCCGTATGTTATCAGAGTACACCAGATGCTACTAGTATACCCTTTACCAGAGTCTGTAGTCAGAGTATAGCAACTGTCAAGTACAACAAACTGTCAATGGTTTTCGCGCCTCGTAATTTGCATGACAGCTCAGAAACGTCTAGGCGTGTGAATTTCCCGC	030	Simulated_Annealing (G)	0.168575	5.24757	-0.12976
gosai_4199	TCGAAGGCACCTGTTGAATTCGACGGGTCGGCCCGTCGATGCCCTGATCCTCCAACTGACCGAAGTTCCCGCCAAGTGGTGACACTTTATCACACTATAGCCATCTGGTACGTGCCGATAAGCACGACTGACCTGAGGAGGTCTCTAAGCTATCCCCCAAGGAGCCGTTAGTGCGGCTTTTTGTTCTTCCACCCCAAATA	030	Simulated_Annealing (G)	-0.0822889	5.10265	-0.281484
gosai_5071	CCTCATATCTGCGTTTTCCCGCCAAACTTATCTATAGGCGCCACCTGTTATCTATAGCCACATGGCCGTTAGTTTTGACCGCACTGGCTGGTATAACTACACATGCAGATGGTCTAGGGTGACAACTGTATGTTATCTGTTGCTGCACGGCTTAACACCACACGTCAAGGGAACCCGTCTCACAAGGTAAGGATGCTATC	030	Simulated_Annealing (G)	0.125823	4.97872	-0.36134
gosai_4143	GTTCGAACCCTCTCACACTAACTCGACGGTTATCTACCACTGCAGACTTTCGGGGATGACCAACTGTCAACTCGCAGTTAAAATCCTCATGTGTCCTTTTCCTAGAACCGTCTCTTCCTAGAATTCCGACTTCACACCTCTGCCTGTTATCTTACTCTCCCGCCTTGAGGTGGAGCTGTCACACCTTAGCTCGTGTGCAC	030	Simulated_Annealing (G)	0.33359	4.82818	-0.501172
gosai_7103	TCGCGCTACAGTGCACCTGACAGCTACCTCCACGCTTTTCCCGCCTTTGACGGTTGGTATCCACTGCTGAGACGTTGGGCTAGATAAGAGATTACTCATAACGGTTGATCCGTCAAGAATAGATAGAATAAGATTCTGTCCTGAAGGGGTGTGTGAAACTCGCTTCTAGCCGGTGCTTATCAGTTACCTCCAGCTGTCAT	030	Simulated_Annealing (G)	0.11505	4.98195	-0.517121
gosai_5211	CGCCAAGACCTGACACTTGCTCCTAGTTGACATTCGACGTGCGAATCGCGCCTTTAGCCCGTTGACAGGCTATAGATGCTAAGAGGTGATAACCTGTGGAATATATGGTTCCTAGTGATAAGACCTCCCCTCATGACTCACTCCTAAGAGTCTTATCATGACATGCACGAGCCGTTAGGGCTCGAGGTGTGAAGATCCAC	030	Simulated_Annealing (G)	0.205122	5.03062	-0.54722
gosai_7253	CATTGGGACCGTCGAGGCGTCAACGAGTTGAAATTACTCATATCAGTATAGCACAGACAGCACGTTGCTTACCAGACCTAGGTTACAAGAGTGCGGTGACCCCTATCTCCTAGCCCCAAGCTGTCATCCCAAGATAAGTAGACTGACTCCACTGTCGAGCCTTCGAAGATGACAGGACAGCCCGCCTTGACAGTTCGCAT	030	Simulated_Annealing (G)	0.0957384	4.93195	-0.568386
gosai_5898	CCTGCAACCAAAGATAACCAATCTATCCTGCTGTTACACCTGTCAAACACGTGTGGCGCCCTTAAGATGAACCTTATCTGTGCTCCCCACGTTGCACAAAGCACTTAAACTAATTGGCTCCAAAAACAGCCGCCTTTACCGATAAGCTCTAGGCATTTCTTGGAACCGTCAATTGCAATACTCAGTGTCTTCGACGGCAC	030	Simulated_Annealing (G)	0.0275813	4.85305	-0.588463
gosai_4981	TTATCCGCATTGGTCCAATAATCTATAGCATCAGTCAGTGGTTAGCGCGCCAAAGTGCATTAGCACCGCCTCCAGAGAGCAACATCTGTTTAGTGTAGATAACACTTGCAGCCGTGACAAACCTTTGGACATAGTCTTTACCACTTGGACCTCATGGACTTGGCGCCTGTCAATTAGTTCTTCGACGGCCCCTCTTATCT	030	Simulated_Annealing (G)	0.0881348	4.88534	-0.440275
gosai_7348	GTTTGACATTATCTCTAAACGCATACGGTTGGAAGCGTCGGTAGCAACTCATGTGGGAGTCCTTGAGTTGACAGTTCTAAGTTATATACATTGTCAGAAGGGGGTCAAGATTATGACCTCCTTAACCAGGCCTTATCTTCGCTTCACATCTGGCTTAGAAGATTAGGAGGACTTCCCGCCAAAAGGGTACTCTCCATCAG	030	Simulated_Annealing (G)	0.0311375	4.78012	-0.62251
gosai_7015	CCGTCGGAGACGTCGATTAACAGGTAACCCGATGCATCATTTGCATAATCTTCGCACAGCAGACTGTAACTGTCAAGACTACTCCTTATCTGTCACAGACACATGGCTTTTGATAAACTCATCGTTCATCAAGTGCTTGACAGTTGTGTAGTTCCCGCCAAAACTTGACATTGGCCGTATATAGGCTATAACAACGGTTG	030	Simulated_Annealing (G)	0.0534943	4.77677	-0.614276
gosai_4536	GTTATCTAAGGGGTGCATATTCCGCGAACAGCCTGACTCAAATTCCTGGAAGCACAACACATCTTATCTACTTCTAGCAGTTGACAGCTGTTCCACACATGTCTTGAATTGGTAGTGATACTAAGTGGGTAATAGCTCACACCTTTGGCGGCCGTCTACTAGACAGCTGTCATATACTGGAAAAAGTTCGAACGTCTTGT	030	Simulated_Annealing (G)	0.00472034	4.63642	-0.536052
gosai_6373	TTTCCCGCGCGAACTGGAGCGGGACTCAAACACCTGTCATTCGACTTTTTCCCGCCTTTTGCGGATAACTCAACAGATGTGAAAACATGGTCCATCTACAGCTGATTGCGTCCCCTAGGACACTTTATCAGAGCCCAACAGCGTATCTGGTGACTTGAGATAAGTATTTCTTAGAAGGCGCGAAGCAGCCAGATGACAGC	030	Simulated_Annealing (G)	-0.00124553	4.69815	-0.563457
gosai_6594	GCTAGAGGTGTCAAGAGTGGCAATTGGCAACAGGTGAGGGGAAACGCCCTCGAACCTAGGAGTATAAATTTGGCGGCCACGCTTCCATATGCCAAGGCACTCCTTATCTGCCGTTACAGGTCTGGCTTAGTCTTGATAAGCTTCGACGGCTGTCCTTGGTTATCTTTCTAGACCAGCTGTCAAGCAAGCCTTGGATAGTC	030	Simulated_Annealing (G)	0.102619	4.68744	-0.524158
gosai_5556	TCGAGTCAGAATCGTGCGACTAGCCCTAGTACTGAGGCATACTTGATTGCCGTCGAGGCGGTTGAAGACAGCTGTCAAGTGTTGATAACTCTAGACCGTTGAGCATATGGTGTGTCAACTTCTGTCGCCTTCTGTCCCCCAGAGATAAGGCATTTATCAGCCCCAAGAAGGGCGAGGTGTGAACACATTAGCCTTGACAC	030	Simulated_Annealing (G)	0.155827	4.68149	-0.612935
gosai_5483	GCTAGAGCATGCATCGCTCGGTTGGCGCGATAACGCTCGTCGGCTTGGGGATGTACGCGTTATCTAGATGGAGCAGCTGTCTTCAGCACTTGCCATAAGGTCTTTATCTCTGGTTTCACACTCTTTCGCTGGAGTCTAGAGCATCAACTATGCTGGGTAGCCTTGATAGGGACTTCAACGGTCCAAGTGATAAGCCCGAT	030	Simulated_Annealing (G)	0.0421139	4.61893	-0.509273
gosai_4545	CTTATCTGGCTGCACCACCCGCCAGTTGTTTCCCGCCAAAGGGCTTGAAGGTGTGACACGGTAATGAAGGCTCCTATCGTGCGTTTTCAGACGCGCTAGACCTGACAGCTGTCTATGATGAGATACCAAACCCAACTGACAGCTGTGTGACGGTTGATAACACTTTGACATCAGCCCCGTAGGCTATCACATGGTCCCGC	030	Simulated_Annealing (G)	0.0327912	4.58249	-0.496906
gosai_7187	CCTCGCCACCTTTTGGCGGGAAACAACTCGGCCGTCGAACTGGGAGCAGTAGAGTTATACCAAAAGATATGGGCGAGTAACTGTCAAAACGTTTGTCGGTCTGATAGGGCGGATCCCCAACCGTCGGGTACCAGATGTACACTCTAGATAAGGGTTTAATGACAGTTGAAGATCACACTCATTAATTGACTATAGGGCTC	030	Simulated_Annealing (G)	0.0350849	4.67801	-0.27644
gosai_6734	TTTGCCGTCGAAGACACCTGTCATTAAGGAAGCGTCCAAGACACACTATAGTGTTTCCCGCTTTGAGCGTTGACAGAATTCGCGGGGAGTCAGCCAGCAAGCAGGAAGGTATAGATAAGCGCTTTTTATCCCGCCAAGAACACCTATCTCGACGCAACAGGCAACCAGCACACTGTCAGTTATCTTTTGACGCCTCAGTG	030	Simulated_Annealing (G)	0.0471212	4.55919	-0.33996
gosai_5356	GCAAGCCGTCGAAGATTGGTTGGCACAGGACAGGTTTTCGCGCCTTTTGCGCATATGGCTACTGCCCCAGACTACACTCAAGCCATCTGCAGCGGCATGATAAGGGGACTATCTTAGTTGGGGTGGAATGACGGTTGTGGCGCTTGGAGATAAGAGCATTGGTACCATATAGCAGAGCATGGCAGGTGATAGCACTATGC	030	Simulated_Annealing (G)	0.0178138	4.55907	-0.296708
gosai_5365	GTTGAAAGATAGGCAACCGACTGTCACTTAAGTACCGTCGAGGAGCGCGTAAACTTATCTACTGGTTCCCACGTAAAGGCTTTCCATGAAATACCGCTTGTGCGCTGGGCTCTTATCAGAGTTTGACAGACGGGGCTCAAGGTGTCAACGATTCTTGGCGGGAAGCTGTCTCATGTTGGAAGGTATTCTAGATATGGCAT	030	Simulated_Annealing (G)	0.0267621	4.59767	-0.298934
gosai_5153	GCTCCCACGACGGGGAATCGTTGGACGGCTCTCAAGCATATCAGATACCCCGTGAACCGACCTGTCTTTTGAGTTCCAAGAACTCGGTCACTCTGGCGGTAACCTAAATACGGCTGTCAGTAACCTCAGTGTTATCTATCCTGCCCTGTCTTACTAAGAAACACATGTCAGTTACCCGCCAATATATGTCAAGAAGTGGC	030	Simulated_Annealing (G)	-0.0289051	4.44876	-0.436553
gosai_7712	CTGTCAATTGTCCTAGTAGTGGCAATTTTTGGCGGGAAATTACAGGGCGTCCGTCAAGTGCTATCTGCATGTACCACATCCCTTGACAGTTGGGGAGAGATAGTTTATCTGGCAGCGCACATATGCGTGCTCTTGGGTGTGGTATCTGATAAGCTAGGTAAGGCGGGAATTCAATGTATCGACGGCTACCTCGACCGCTC	030	Simulated_Annealing (G)	0.0827576	4.51044	-0.362764
gosai_4176	TCTGGCTCGGCAGGTGGCCGAGCGCTAAGCATCCACACGGGTGTGATATTCCAGGAAACATGTCACACTTAGATAACAGAATTTGACAAGTCAATGTGGCTGTCAACTCCACGGCTCTACTTCCCGCCAGTTGCAACGGCTGTAAACCGCTGGTCTTATCTAGACATACCACGCCGTCGAAGGTGCGAATACTGAGAAAA	030	Simulated_Annealing (G)	0.120122	4.53149	-0.291823
gosai_4735	GCTCTTATCAGTCGACACCAGCTGTCAAGAGCCGCTAGGTTGACAGCTGCTCTAGCACTCCAAACCCATATCAGTTGCTGCCATCTGGATCGCACCTACAACTCGCAGTCCCAGTCGAAGTGAGCTTCTTCAAGGGCGCATAGATAAGATGCATGGCTTGAGTGTGCTTCCTCGGGGTGCGAATTTGAGATAAGGTTATC	030	Simulated_Annealing (G)	0.0179473	4.39698	-0.471605
gosai_6692	CCTTCGAGGCACGTGCCATGTCAATTTGACAGCTCGCATCTGGAAACAGTTAACGAACCTAGGCTTATCTGCAACCACCAGCATCCAGCTGGTGTTCAGTGATAAGACTTTGACATCAGGATAGTTACTCACATAGGGATGTACAACTTTAGCGTTATCTGATGGACCATCACTAGTGTAGGTCACCCCGATATACTGCG	030	Simulated_Annealing (G)	0.0222193	4.32611	-0.433618
gosai_4108	GCTGGGCTGAGCCGTCGGAAATTAACACGCGGTCGATAGCGCGTTTTGGCGGCTTTTGCGCGCTCTTTTAGGTGCCAAGACGTGTGACTGACAATACGCTCACATACGTCTGTGTCGGTGGACAGCTGTCAAGTGTGATAAGGAGTCACTGACAGTTATCAACTGTCAGCACAAGGCACGCTGTCTGAAATGCAACGTTC	030	Simulated_Annealing (G)	0.0855719	4.28285	-0.508677
gosai_7405	GTTACTCCAACGCATTATCTGAGCCACCAGACGGCCAGTGTCTGTTCAGTGGAGATCAGACTGACACCTTGCGTGGAGCCGATTTTCCCGCCAAAATGTGCCTGTCACATCTACGGTGCTTATCCCTGTAACCGCATCTGTCAACCGTCGACATCTAGCCTTATCAATGCTGTCAAGCTACACGTGGCTGTGACAGTGGC	030	Simulated_Annealing (G)	0.0184143	4.24065	-0.733708
gosai_5815	GTAAGCGCGGGAATCCGTCGAAGTTGACATACATAGGCCTTAGCTCCTTGTATTTCCCGCCAAAGTCCAGTAAGCCAAACCTGCTGAGGTACGGCTTATCAACTTGCAGCAGACGGTTCCTCCCTACACAAGTAGATAAGATGTGCACCCACTCTTGCCTTTAAGTCATGTACCCCATGGCTTAGGGCAACTGTCGATGG	030	Simulated_Annealing (G)	-0.0304298	4.17333	-0.481436
gosai_7704	CCTCTGACTGACAGATATGAGAGTTCCCGCCAAAACCGTCTGGAATCCGTTGATAAGAAGCTTTACGCTCAGTTAGCTGCTGGTAGATGTTCGAGCGAGCATGTGGAGGGCGCACATCTATGTTGACACCTGATAAGCACATCACAGGGCGGGAAGCGGGAATCGGGCTTGCGAATGACACCAAGGCAGTAGCGGGTACC	030	Simulated_Annealing (G)	0.0333631	4.21636	-0.374196
gosai_4986	CCCGGCGTTCTGTTGGCGGCTGTCTAAACATTTGACACCTGGTCCCTATCAGTGGCCGGCAGTTGCCATAACTCGCCCATTACGCGCCAAATTTTTGACAGCTGCTGATTATCTCAGACAGACCTTACAACACACCCAACTGTCAATGACACTTCTTACTGGCGGGAAAAGTGGCACGCCTTATCCTTATCATCTTGGGC	030	Simulated_Annealing (G)	0.0643679	4.25118	-0.601138
gosai_7611	TCGAAAGAGCTGTCCAACGCGCTGAGTCAATTTTTGGCGGGAACTGAGGAGGCGCGATAAACGTCTTGTCACCTTATCTCGCTGTCGCAGTAGACAGAACGTGACTGTCAATTACAAGCCCCTGACACCAGTCTGATATCCAAAGAGTGAAATTGAGCAGAGGGTGCTTATCTTTCCCGCCAAAAGAAACACGGGTTTGT	030	Simulated_Annealing (G)	0.0656582	4.22682	-0.518615
gosai_5523	GCCGCGTGGCACATGCTATTTCCCGCCATAAAGTCTGCTCGACGGGTGTCAACCATCTCCGTGCAGACCCGTTCTAATCTGTCATAAAGTGATAGCTTGTGGTCTCCGATAAGCACTTGGCTCCTATCTACGTCTTCCAGCTGGTCAATGTAGATTATTGTCAGTTAGGCCGTCAACGGTTGTCAAGGTGCTGATGTCTC	030	Simulated_Annealing (G)	0.0330474	4.14141	-0.435789
gosai_6262	CCGTCGAAGCATGTGGCGCCATATGATAATTTGGCGCCTTTCTCGCAAGACGGCCGTCCGTCAATTGGTTTTAAGCCTTATCTACCGATCGCAAGCACCCTTTCTATCGCAAGCCAGCATGCTTATCTTGGCTTGACAGCTGTCAACCCAACCGTCCAGCAGGTGCATATCTCGGCTTGCCACCTGTATTCTTCGGGTAC	030	Simulated_Annealing (G)	-0.141268	3.83324	-0.539725
gosai_7197	GCTGCGGGAACGGAGCCGTCTAAACTTATGACAGGAGCGTCCTTATCAGACGCGCCCAGCCGTCCAAGATGCTAATAAGATATTGGAGGTACTTCAGTGACTCGAGGGAGTAGAGATTAGAGGACCAGCTTATCTAATAGTCCCCAAATTGCTGTTGGCGGGAAAGGATGACTCTAGACGGAACAGAGATAACAGATACA	030	Simulated_Annealing (G)	0.0260534	4.04747	-0.402656
gosai_5866	CCTTGGCGGTAATACCTGTCAATGATGGTTCGCGAAATGTGACTCAACCGTGGATGTTCAAGTCGTGTTATCTCCCGCCAACAGACAGCCTATCCTAACAGCCTACTAGTCATAGCTGTCATTCCTAGAAAAAGGCGCCAACTGTCAGTTGGCTGGTTGTAATCGCAAACCATTTAGCACGTGCTGTCAACTCAAGCGCG	030	Simulated_Annealing (G)	0.0195205	3.98792	-0.377692
gosai_5096	TGCCGCCCGTCGAAGAGTCATTCGCACACATGCCGCGCTTAGATACTATCTGCTTTCCCGCCATCTGCCCCTGGCGGTATCACAAAGAGTGCTTATCTGAAGCTACCAACGTACACCTCACTAGGCGCCTTCGGTTGTGCTCCTGTTCGTGACTCATCAAGACCGTCAAGGTGTCAAATTTGACACTCGCGCTTATCTTG	030	Simulated_Annealing (G)	0.0973393	4.03514	-0.586692
gosai_4573	TCGGATCGAGCGATACCGAGGTGTCAATGTCTCGCATTTTGGCTCGACTGTCACTTGAAAAGTATCTCCTGTCACTTTTCCCGCCACTTATCAGCATCCTCACATGCGCTCAAGACATTACGCGGTTGTGATAGCTTATCTGACGCTCGACAGCTGTCAAGTGTGATAGTGCATCCACCACACCCTCTTCGAATGTCTAG	030	Simulated_Annealing (G)	0.0337005	3.92584	-0.580929
gosai_5465	TCGGTCGTCGATGCTATCTGGAGTTGAGCAACCACACGCTGTTCGCGCGCGATAGCCGCCTGCCTGTGGGTTCTAGAGATAAAACCTTTTGCGTACTATCAGTGTCAACCCATCGGCCAAGACCTTCCCGCGCCACATTACCTTATCAGATACTGCTCCATCTCCTCCACTTGCCCGTCGAAGATGCGGCGTTGACCTGT	030	Simulated_Annealing (G)	-0.00769968	3.90835	-0.368512
gosai_5886	TCTGATAAGGCTAAAATTAGCCGTCGAGCATTGTCACTGAGATAGCAAGTGTATGCCCTTATCTTAAGCTCGCAGAACAGTTGACACGTCTATACGCTCTCCGTTCTGGAAGGCAACTTGCACGGTGAGATAAGCAGAAGTCGATGCGTTGACACTCATAGAATTTGACAGCTGTTACCTTACCATCCGTCTTGGCTAGT	030	Simulated_Annealing (G)	0.00538671	3.94179	-0.43768
gosai_7877	TTTCTCCCGTCGAAGACCTAGGTTGTACTGGTCGCGGCGTCGGAAATGGCTTGCCATATGAACGGGTCTGTCAAAAACGGGCGCTTGATATCGCTTATCTTTCCCCGAAGCAGGCAGGAGGTCCAGCTGTCAAGATATGACAGTTGGGTGCTCCCTAGGTCCTCCTTATCTTCCGACGGCTGTCCAATACTAGACGGCTA	030	Simulated_Annealing (G)	0.00513783	3.94897	-0.473055
gosai_7737	CCCGTCGAGGCGCTTATCGCACATCGGCAGGTGTCGCATGTCAGAGCTGTCAAGTTGAGATAACGCGCGCTTGCCGCTTTTCCCGCCAAAAATGTACCCGCCGACGCTTATCGAGGGCAGCCACCTGTTGTCCATGTGGATGAGCGTGGCGGCGAAGTGTCCTTACTCTTAAAATCGTCTAGTGCCTCGACGGCTAGTGT	030	Simulated_Annealing (G)	0.144033	3.63539	-0.321701
gosai_4581	CCTATGTCTTATCGCCGTCAACCAGATGCATTACACTGTCAAAGGCCCGGTGGTGGCTCGTGTCACGCTCAGTTGGCGGGAAAAGAAGTTATAAACAAATAGTCCTCCAGAATGACATACCCTGCGTGCTTTATCTTTCCCGCCAACTGACACCGTTGACAGTTATAGAAGTGTTGATAAGGTGAGGGGTGTGAAGCTAT	030	Simulated_Annealing (G)	0.0175203	3.52899	-0.499562
gosai_5650	CCTTGACAGCTGCCGTCGTCAACGGTTGGTTTCCCGCCATTTGCCCCTTGATGTCACGCTCACGAGGTGGTGCAGTACCGCGTAACCGTCAATTTGACTCATAAGTGTTGGGGAGTCTCAAGGGTGTGAAAGATAAGAATAAGCCGCCCATGTGCACATTTGACACTTATCTCAGTGGATGTCGTCCCGTCAAGTTATCA	030	Simulated_Annealing (G)	-0.0160859	3.42035	-0.597913
gosai_6735	TTATCTCGTGGACCACATGTGGGCGGCAATTTACCGCTTGGCGGGAAAATTCTTGGAATTGGCGGGAAGTTCGGTTATCGACTCTCACCTTGGTGCGCTATCACTCTTATGGCCAACACGCGACGGTAAAGCGGTTTTCTAAGAAATTCGGTTGTGATTACTTAGATAAATTGCGCGGAAAGTACCTGTCAACGAGGGCC	030	Simulated_Annealing (G)	-0.0206862	2.96877	-0.081772
gosai_7292	GTCGCCGTCGAATGTCACAAAGAGCGTGCAAACTATCAAGCATTTGCGCGGTGATCGACGGCTCCACGTGTACTGGCGGTTATTCAACAATGCTAATCGATAGCAGTCGGGCGGGAACTTCAAAACGCCATGCACATGTCAGACTTTATCAGTTACCCGCCAAACACTTATCATGCATCTTCCATCTGCTGCTGGTTAGT	030	Simulated_Annealing (G)	-0.0415867	3.05658	-0.386121
gosai_5300	GGCCAAGGTGCGAGGCCGTGCACGCCACGTGCCGCGCGCGCTTTCCCGCGCTTTTTAACGACGCGCATTGCCGCCCTTGATATGAGGTTCTAGCGTTCGCTACGGTGACGGCACCTGATCCCAGCTGATTAATATGACTAAGCTCATGGACCGGTCGCATCTGTCATGCAACGATAAGCGCGAAACGCATCCTCCGACGG	030	Simulated_Annealing (G)	0.100701	3.10073	-0.334413
gosai_4437	GCTGGTTCAAACCGTTGACAGCTCCAACTATCGTAGTGTGACAGCCTCACTACATATGGATGCGGCTGATAATGTTATCCTTCCGATGTCGGGCCTGTCACCTAGGCGGGAAAATGATTGCCTTGACAGCAATAGTGGTCAATATTGGCTAGCTATCTAGAGGATGCACAAGTGCACTCAAGGCTTATCTATGGTACACA	030	Simulated_Annealing (G)	-0.348411	2.41653	-0.890926
gosai_7612	ATAAGGGCGAACAGCTGCTGTCTAAGCTATACTAACCACACCCTACCGATGGGCTTAGGGATTCGACGAATTAAGGAGCCCTCCCAGGCCCTCAAGAAATACTTCGCGCCAGCTTATAATTTGACACCCTTATCTACTTGAACCAAGTTGTGCGTGGCCTGTCACACCGGAGAATGGTTAGGCAATCACCAAGTAATGTT	030	Simulated_Annealing (G)	-0.106523	2.60845	-0.365235
gosai_6416	CCTTCTAGCGTTAGCGCCTCCTTTGAGCGGGAAGATGGAAAGTCTTTGACGGGAGATAGGAAGTCCATATCATCTTTCCCGCTTTACACCAACAAGTCGACAGGCCTCCTGTTTGCACTAAGCGATAAAGAGAAGCCAAGACTATCACATTGGCTTCCTAGAAAAGGCATTATCGCTATCCTGGAACTGTCGACGAGTCA	030	Simulated_Annealing (G)	-0.113217	2.42178	-0.28179
gosai_6098	CGCGGGAACTGTCAAATTCGACGTGCCGACTCATTATCTGAAACTGCACGCTGCACCCGCCGCAAACGCGTCAACTAAATGTCATCAGTGCCGGGAGTGTCATGTATAGTCATAGAAACGGTCCTTGACACAAGAGGCAATGGGACCGCTAGTGACCTGTCAATGTCAAACAGACGGCACTTACCCTTATCGGTCTTGGC	030	Simulated_Annealing (G)	-0.0530734	2.54158	-0.149354
gosai_7367	GCTGGTCCTGTCAAAAAGCAGCGGCGGAACCAAGATAACCCTATCTATTACTTCACACCTGAAAACGCCTGCCTACATAGTCTTATCAGTAACCGTTCATCCCAAACGCAGTAGTGGATGACCTGATAATGGTCAAGAGATCGATAGGCTTATCTGCAGGTACCAGAATTTCGCGCCTCTTGGGTGCAACCTGTAGCGTC	030	Simulated_Annealing (G)	-0.230167	2.40483	-0.8894
gosai_7520	TCGAAAAAACCTAACGACACCTGCTATGGATTTCACCCGCTTCTACCGTTCGCGCCCTTATTCCACGTATTACCCTATCTATTTTTGTACACATTAGCCGTTGCCCTGCCTTTCCAAGAAATACCTAAGTCTTCTAAGAAAACTCGACGTGTCAAGTATGACTAAAGAGCTGGCCAGATGGCCCGACGTGCTGTCAATGA	030	Simulated_Annealing (G)	-0.199157	2.33505	-0.440562
gosai_4222	CCCGCGAGTGTCAAATGGTACCCTACTGGAACGCGCGCTTCTTATCACACCTCTCCATCTGTCGACCGAAACATGGTAGCAGATTAACCGAGTCATCGCTTATCAGCTCCCAAACCCATCGCCACGCAGATAGGGAGACTGTATGTCATGCGGAGCGGTCAATGTTGCAAATGATAAGGTACCTTCTTCACACCTTATCA	030	Simulated_Annealing (G)	-0.276798	2.40244	-0.781781
gosai_6934	TTTTGGCGGGAAACTGTCAACTGGACGACTTGATAAGTGGCTGTCGTACTCTGATGGCCGCATGAGATAACCCTGTCAACGAAGTCAATTGATGGATTGCAATCTCCCATTTGGTACCCAAACCCCGTACTGAGTCATTGACTTCACCGGCGTGCCTAAAGCGGGAAGCGCGTGCATCTGGTTGAGTGCGATTACCATAT	030	Simulated_Annealing (G)	-0.144845	2.73164	-0.187102
gosai_5382	GCTGGGTCCCGCCAATTTGGCGCCACATCAGTGATCCCTGATAAGGACCAACTCAGTAACCGTATAGCCAAACAGGCGCGAAACTCAAGAGTCAACTCATTATCAAGCCGTGGCCTGTCAAGACAATTTTGATAAGGCGGGAACTTTTGACATCAGGTGTTATCACTACATCAGTACGCGCTAGCAGCACTTGACAGTTC	030	Simulated_Annealing (G)	-0.121879	2.29645	-0.784441
gosai_5094	TGCCGAAGCACGTGCTTTTCCCGCCTTTGACCGTTATCTCGGCATAGACCGTCAAGAGCTGTCAAAGCGGCAATTGCCGTTATCTTTCGCAAGCATCTGTCTTGTGACATGGCAGTGTCAGTCTGATGGTCAATGTTACTGTCACACGTCGGCATACTTTATCTTCGGCCTGACACTTGGCATACTGGTACCCAAGTCTA	030	Simulated_Annealing (G)	-0.10091	2.28559	-0.73703
gosai_6434	CCTTCGCACGTGTCAAGCATGTGTCGTGCACAGCGTGCCGGGCTCGCGCCTTCTGTCGAGACCGTCGCGCTCACTCTATCAAGGTGTTGTCCATCTAGCACTAAAGATAAGGATATTCCGTCGAATAACCTTATCTTTCCAGGAACATCTGTAACGGTGGTATTGGCGGTTATGTATTGGGACATAGATAGTTCTTATCG	030	Simulated_Annealing (G)	-0.260715	2.18376	-0.978165
gosai_6257	GCTCGACGTACGAACTGACAGCCCGCTGATGCAGATAATGACTACAGCGATAAGAAGTAGCGTGCGGTGTTCGCAATACAGCTTATCTTGGCCAAACACCACAGTTGGACGGAAGCTAGAGGTGATACCTTCTACTAAGCACTCATTATCTCGAGCACCTGCTTGCACTTCGAGCATCTTACCGATATCATCTCACGCTA	030	Simulated_Annealing (G)	-0.223016	2.26938	-0.955581
gosai_7719	GACCCGTCGAGGTACTTGACAGCAATTCCTGTGGGAGCTGTCAACAGTCCGTCTGCAGGTTGGTGTGTTTGAGACTGATAACGACGTACACGCCAAGATAAGTGGACCCGTCCACGTCCTACCTCTTTGGTATCTAGTACCACACCAGTCAGTAACTATAAGACTGCGCCGTCCTTCTTTGACACTCTAGACGCCCTTAT	030	Simulated_Annealing (G)	-0.0779626	2.27314	-0.753073
gosai_5364	GCTCGCTGGACACACTTATCAGGATAGCCAGCTGTCAAATGGCCTTACCTGATAATTGGCACGTATTATCTGCATTCCCACCACTCTGTTACCTTGCCCGCAAGATAAGGGGTCTTGTCACTTCCTACACCTTGAGTGCTGCAGGACAAGATAAGAAGAGAGGACCAGTTACCATTAGCCTATATATGGATACCTGGTCC	030	Simulated_Annealing (G)	-0.201476	2.18888	-0.975648
gosai_4586	CCTCGTGTGCCGTCGAGGGTAGGCGCGAAATTTGGCACGACTCCTCTTATCTGCCCTTCGACGGCGTGTTAGATGGCGCGGCCAACCCAAGTACGTATTGAATCGACCCTATGAGTCTTCCTACGTTAAAGCCTGCCACTCTCTGATAACGCTTATCTGTACCACACATCAGGTGTGATGTTCTCCTTATCTGATAAGCA	030	Simulated_Annealing (G)	-0.095082	2.28362	-0.945134
gosai_6357	GCAAAATCCCTCCGACGGGTTGACAGCTAAGGCGCTCAAGATACATGGCAGGAAAGTGACAAATGGATGTACGGCTCCAACGCGTTATCGCACAACACATGTGGTGCGACTGGATGATTAGGCTAATTGAGGTTGGGGATCCCTTGAGGTGAGGTGCTACTCTTTAAGGAGAGCGCGCGACCTTTGGCGGGAAAACCTTA	030	Simulated_Annealing (G)	-0.326927	2.09661	-0.877584
gosai_4350	GTCCCTAAGTTGACAGAGAGGGCGCTTATATCTTATCTTGGCAGCCGTCGGAATGTAAGAGAGTGCACCCGAAGTTCTTGGAATCAGGTGTCAAATATGACCCACATCGATAACGGCGGTCAGAAAAGAAATAGAGTGGCCGTCGTGGTGCTAAGATCAAGAGTGTCCCGCTAAATTCTGTCCTAGACAGCATTTGGCGG	030	Simulated_Annealing (G)	-0.0486487	1.84954	-0.397265
gosai_5754	TCGAGTATAGACAGCCCTATGCACCTGCTCCGGTATATCCCTGTCACTCAAGAACAGGATGCGCTCAGCTTATCAGCAGGACCATGTCTTACCGCACATTCCAGAGCTATGAGCCAAGTTCAACCAGATAAGCCTTGCCTTTCCAAGAATTCGCCTCCTTATCGCTTGGGTCTTGTCAAGTCTGAGATGCTTGACAGCTG	030	Simulated_Annealing (G)	0.235177	2.59289	-0.212338
gosai_7147	GTTACACACCTCAATTCTTGGAAGACACCGGCAAGGTTATCGATAAGCCATCTGGCCCCCTAGACTTGACGGGTTATTCTAGGAACTGTTGACTCACGTACGATAAGAGGGAGTAACTGGAGTCATTCACTTGGACCATGTCAACCTTCGACGGCTTCGCGACACACGTGCTATGCATGTCAATGTTGCCAAGTCCAGCA	030	Simulated_Annealing (G)	-0.265901	2.24572	-0.823803
gosai_4774	CCTTGACAAATGAGGTATCCTTCGAAGATGCGCGCTATCAGCCACTCAAAGGCTGCCCGCAACCGCAATGTGATGCCGCCTCATTGTCATATCTGCGGGTGACAGATGTTCGTACTGTGCAAGAAGATGTTATCTGTTCTTGCCACATCACATATGTACATTGCTCTTTTGGGGCGAACAGGTGAGCTGCTGTCAATAGG	030	Simulated_Annealing (G)	-0.26644	2.32976	-0.687755
gosai_7638	GTCATCTTCGACGGCCAGACATCTCACGGACGTAGCATGGTTGATGTAAGTGCTTCTATTAACCTTACCCAGCAGCATGTGTCGGGGAGGTTGACAGCTACTCTCACACGCTTATCTTTGGGCCCGTCCAGATACCGATTACGCCCCTAGTTCTAAAAATTGGTCCAGCTGTCAAACCTAGGTCCTTATCAGCACTGAAC	030	Simulated_Annealing (G)	-0.0614133	2.09118	-0.714258
gosai_6198	CTCATCATCCCGCCACGCCAGCTGTCAAGCAAGATGCTACAGCACACTGGCGGGAACAGCTGGCCCCTGGCGATAACTTATCTCCAATGGACAGACATCGGTCTGTAGGGGCCATTGAACAAATGATGGCAAGTTATTCATCCTTGTCACCATGAAGCCATTCGTGGTACGAGGCTAGGTCCCCACCTGTCCATGTGCAT	030	Simulated_Annealing (G)	-0.383405	2.05813	-0.941325
gosai_6481	TTTCCCGCGCGAAATTCGCACTTATCAGACGGCACGACCTACCCACGTGCTTTCTAAGAAGCGTTAGCAGCTCCCCGAAACCTACCGGATTAAATGTCGCTATCGGATGTTGCATGTTGGTTGATACGCTTCTTATCTGTCATTGCCAGTCTTGGGGTTACACTTGGTCCATCAGCCCATGTAATACGGTAGACAGCTGT	030	Simulated_Annealing (G)	-0.131956	2.25866	-0.662494
gosai_6216	GCTCGGGCGGGAAACGCGGGAATATAAGATCCGTCCATCGCGTGTCACACCTTTCCTCTTATCAGCTGTATGCATCCGTTGACACCCGAAGATCCATCAGGTGCAGCACTGTATAGTCTACTATAGATAAGTAGCATAGCAGCTGCTGGTACTGTCGAGGGTTGACAGCTAAAAATAGATCAACACGTTATCTGTTCCCA	030	Simulated_Annealing (G)	-0.0734055	2.19039	-0.698134
gosai_7158	GGTACCACATTAGACGGCAATTCCATGGAAGTGGTATCGCTCTATAGCTGGCTGCGGCTGATAAGCGTTGAGTGTTCTTATCTTTGATATCCTTCCACCTTAGGCTTCGACGTGAGTCATGAATTACGACCAATATAACTTATCTAGACGGCAGACAGGTGTGTCTTCGGATGACTAGCCTTATCGCACCAAATTTGCAC	030	Simulated_Annealing (G)	-0.187831	1.99233	-0.729537
gosai_6688	TCGAATAAGTGATGCCCAACTCATGATCATCCAGATGGTGCGCCGCTGAGCATCGCACGTGCTGTCACCCTATCGTGTTTGTCAATAGACGGCTTTCGCGCCTTATCAAGCGCATCAAGGGGACATCTGGTGGCGGAGTGATAAGGTGTATCAGTTTGAGCATGTGGTCTGATAACCAAAGAGTCGTGATAAGCATCTTT	030	Simulated_Annealing (G)	0.0595781	2.03072	-0.661418
gosai_4625	TTTCGCGCCCACGGTTATCTCGGATGACAGTCGCTCCATCCTCACCGCCATCCGGACACACGTTCCTAATTGATAAGACACAGTTCCCTAATCAAGCACTTCAACTATCTGGATATTTGGTACCATTCATGAGGGAGTTCCTGGAAACCTCGACGTGTGTCAAAGGGGCTTCGCAATGTTCTTATCAGATCCTTGACAGC	030	Simulated_Annealing (G)	-0.430229	2.07179	-0.90383
gosai_7702	AGGGGCAACTAGTCGTCGAATATCTCAGGTGCCGGCGAGCCGTCGTGGAGTGATCAGCCTATGTCCCGATAGTATGTGCAAACGGCCGTTGGGTAGCTGTCAAAATTCTCAGAATCACGCCTAGGTTTCTTCGAAATGGTTAGATAAGTTGACTACGTCTTTGACAGCGACTATCGAGCACATGTTTTCACACCTATGCA	030	Simulated_Annealing (G)	-0.443517	2.04225	-0.912284
gosai_4031	GTTGAGTACCAGACTACCTGAACGGTCAAGTGGCGTCCCGACGACGCACCTAGGGCGCGACAGTGCCTATCTCAATGATGGGGTGTCAAGACGGTCCCTTACGCGCCACGCGCTTATCTGTGAGGTCCCTCCAAGTCATGATACCCGTTTCGCGCCTTATCTCGTTGAACACACCAGTTCGCTCCAAGAAGATGACTTAG	030	Simulated_Annealing (G)	-0.371225	1.95004	-0.966517
gosai_16792	GCAGACGTTGTCCATTGGAATGGGAGCTTTATACTGTTTCGACGGCCGTCGAGCGTGTGGCCGATGCAGATTAGGAACCGTAGGTTTTCCCGCCCTTTACCGCCAAGGTACCTCAATAGATAAGGAAGGTTCCTAGAAGTCTATTCCAAGAACCACTCATGACCACATGCTTAGCCATACTGACGGTTGACACTTCTTAT	030	AdaLead (G)	0.0696271	5.09546	0.394677
gosai_17798	ATGCTCCGCTACCTGTCCGACGGCCGCCCCGTCTGGTACACACCCAAGCTCATTAGAGTTACCGCCAACTCAAAGCTGCATGTGTAGATAAAGCCATGACTCAAGATAGAGCATCTTGGGTCCCTAAGGCGTGGGAGAAGGAGTCTAGCCGTCAAGATAAAGTATGACTCAACGGTTCGCGCCTTCAACCTTATCTGTCA	030	AdaLead (G)	1.1649	5.91398	1.03876
gosai_19300	CCTACAGGTGCATCACACCTGATATTCGCGGGAAAGGATGCGCGTTGGTTCCATAGGTTTGGGTACTTGACACCTTGTTATCTATTGCATTCAAGACGGTTATGAGATAGCCTTCAAGACATGTGGGGGTGCCTTAAGACAGCTCCTTGGGTCTGTCACTTGAGATAAGGCAGTTGATGAGTCAGCAACGCGGGCTGTCA	030	AdaLead (G)	0.49175	5.55102	0.114247
gosai_16180	TCTAGCACGTGCATCACATGCTAGGTGTTAACCGACGGCATCCGCACGTTCGCGCTCCATGGATGCGTCTGTCTAGTCTAGTCATATACCATGACACCCATAAATTTTTCGCGCCTTAACGAATTGTCAAGTCATAACCGCATCAAGATAACAGACACCCACTTCTGGGAATTTTAGATATCGACGGGGGCGGGCTGAGT	030	AdaLead (G)	0.199549	4.88598	1.09068
gosai_18891	TTCAAGTACTGTCAAGGCGTGAAGATGCTTATCAGTAGAGCGCGGGAAACTGTCTGCGATGACTAAGCAGAGCCTCTAGAGTTCCTAGAATAGGTCCCATTTGAGTTAACCTTAGTGCGTCTAGGAGGTACTGTCAAGAAGTCGACACCTTAGGACGCGCCGTCGAAAAACGGGCGCGCTTATCTATCATCTTGCAGAGC	030	AdaLead (G)	0.627532	5.44133	0.894035
gosai_18436	GCGCAAGGTGTGAAGACCCGATAGAGTGAGTGGTTAGTCTGCAAATTTGACGGCTTCCCGCGCCCAATTTAAAACCAAGATAAGACTTGACCTGACCCCACCCTTTTCTTGGAAGCGAGGTGTCAAGTTATCTCCCGCCAACAGCGTCGGTATAAGCTAACGCGCTCCAAGGAGCGCGCGTCAAAGGTAGCCGTCGAAGA	030	AdaLead (G)	0.953677	5.43376	1.11544
gosai_17614	TCGAGGTCCAAGAAAGCCGGCGCCGCACGTGCTTATTGGCGCCAATTTTCGCGCGTACAGACGGGCGTACTTCTAGGAACCCGTCACAGACTTCTTAGAATTCGGTAGATTCCAAGAACCCACCCTATGTCCACAGCTTAGATAAGAGGCTTGCTATTCACTTCTCCTCGACGGGGCCCTCGAAGGAGTGCCTCACCCCA	030	AdaLead (G)	0.723886	5.30329	1.34413
gosai_19975	GCAGGTTCGACGGCGCGCACCGGGCGGGAAATTCTCCATCTACTCATAGCACATTGTATGGTGGCCACCTCCAGCGCTGGGATGATGCACGACCGTTATCTTGGTGTAGCTATTTCTGGTCCAAGGTGTGCAAGAGATAATCTCAAGTCACCAGACGGCCTCAGCCGTTTCTTGGAAAAGGGCGCGCGCTAAATTGACAG	030	AdaLead (G)	-0.0143467	4.84973	0.712833
gosai_16145	CGCGCGGTCCACCTGTCCAATGCATGTGCTTAAGAGCTATCATGAAGATGCTAGTATCAAGTTACAGTGACTCACACCTTCGACGGCCGTCTGTATGACAGTTAGTGACAGCTGCAAGGCGTGCTTAACGCGCTATCTGTTCGAGGAAGCCACATGTATGACTAGACGTTTCTTGGCGATAACCGTCTTCCAAGAATTGA	030	AdaLead (G)	0.596633	5.2955	0.853915
gosai_16212	CCCCGATACTCTAGTATCTATTTTGCGCGCGCCGTCTTGACCGCAATGACTCGACGGCTGCTATCTTCTGACAGCGCGCAAACTTATCAGGGATGCGACGGCTGTTGTGTGGCCAACACCCATTGAGCTATTTCTGAGAAACTGCTAACCGCGCCTACCTGCAGCTACAGATAAGGTCTCAATGTCATGAGCATCCTTAT	030	AdaLead (G)	0.390984	5.14293	0.779711
gosai_18668	GGTGCCGCGCGCTTTAGCATTACGGTTGACAGCGCATAGGCTATTAGTCAGCATCGCATCCAGCATCAGCGTAAGATAGACGGTTATGGCGGGAACTGGCGGGAAATATGACTAACCGCCCCCACGCCTTAAGTGCTGCTACACATAGATAAGGCTAAGGCGGGAAAAAGGTGCTGTCAAGGCGTCAAGTAGTCTTATCT	030	AdaLead (G)	0.858548	5.23236	1.29445
gosai_19872	TTCGTGTTCAAGGTGCGCGCTAGTAGACGCAATTGGCATTGACACGCGTTCGACGAAGCGAGCATCGTGCCACGAGTTTTTCTAGGAATGACAGTTGATGCATGCAGAAGCATCGACGGTTTCTAGGAAAAACCACGCCTGTGCTGCACAGATAAGATAAGTCTGTCAAATTTCCTAGAAACCACGGTTGACAGCCACCC	030	AdaLead (G)	0.765175	5.25096	0.990124
gosai_16722	TTCGACGAACCGTCCAAGGAACTTGACAGCTCGCTCTCGAAGCCCAGTCTAAGCGCGAAAAACCACACGTCTTCATCACACCTATTTCCAAGAATCCCGCCAAAAACTACAGCATAAACTTGCTTACGTCTTAGGTCTCTGCATGGTGTAGATAACCAAAAGCAGCATCGATGAGTCATAGTTACTGGTCCACCTGATAA	030	AdaLead (G)	0.452998	5.34223	0.43062
gosai_16038	TGACCGGTGCATCCAACCTTCGACGGCAAGTGAGCCGCATGTGCGCGCTATTTTTGGCGCGATAACGGTGTCATGCATAGTGCAGAGTCATCTGCAAGATAAGACTAACTGTCATACTAAGACTTGGCGTCTATGGTTGAAACCCCAGACTAGTCTTGAGGAGTTGCCTTAGCATGACAGATAGTCTTGGGAGCTGTCAA	030	AdaLead (G)	0.0499939	4.90119	0.450581
gosai_19544	CCCGATAACCCAAGAAGCCGTCGAGGCATCCACGCGCATCCACCTGATTACCATGGTGAACTGTCACCGGTGCAAGATGCTGATAAAGTTAAGGGCTGCTGACAAGGGTTTCCAAGAAATGACTCCAAGTTCTAAGAACTTCTCAATGACAAGCGATAAGCCAGCAGGTGCCGTCGACTGATAAGATGAAAACGCGCCAA	030	AdaLead (G)	0.115239	5.2272	0.187842
gosai_19912	CCTGTCCAACTCCTCGACGGTACAGCTAGGTGTGACAGCTTGTAGGCTAGGGTTACTTATCTCCTCGAGGCGTTATCCAAATTCCTGGAACCGCCCACAACGTACCATCTGTTCACTGAGATAAAGTAAGCGGTTACTCATCCTCAAGGTGTCGAGGATGACTAAATAGTACCCTTGACACCTCTACACCTTAGCACGTG	030	AdaLead (G)	0.519663	5.26635	-0.49068
gosai_19125	GCTTGTCAGCCTCGAGGGCGCGCGTTTTCCCGCCGTCTAGACTCGCACATGCAAATTGACAGCACCGTTCTACAGCAACCATATGACAGTTCCTTGAAGACTGACCCAAGTATGAGTCTTCCCAAAGATAAGCCAAGTAGGGTGTTACCATGAGATACCTTATCTGGTGTTCCCAGAAATGGCTAGGCATGACTAGACCG	030	AdaLead (G)	0.660672	5.40978	0.322876
gosai_18537	TCGAGGCACACACCTCAGGTGTTCGACGGCGTCTACCATAGACGGCCACATGTGGCTGTAGTAACCTTAAACGCGCGAAATGGAAGGCGGAGCACAAGGCTCTTGAGTCAGCTCCTTGGACCAGCTGTCAAAACTGACAGTTGGAGTGTGACAGTGAAGATATCATCTCCTTGTGGCTGGGCCCAAAGAGATAAGGAGGT	030	AdaLead (G)	0.33019	5.34283	-0.573432
gosai_19979	CGAGGCGCATCACCTGCACCCGTCGAACGCCTATATCACCTGTCAAGGCATTTGAAACTCCGCAATTTCCCGCCTTTTTTCAACCAGTGACCCTAAAGCTTGACACTATAGATATTACGAAGTCTTGACAGCTCGTGCCTGCTGCTCAAGACAGATAAGACAGAGTGACAGTCAGCACTTCTTGGAATTCCTTCAACTGA	030	AdaLead (G)	-0.000895843	5.06004	-0.301054
gosai_18019	CCTGGCGCTTGACAGCCGGCACAGGTAACGTAGGCAAATTTGGCGCGCTCTGTCAAAGATGCCTAGCACTAGTTAGTATCTCTGGTCCACAAGACTGTTGACTAGTGATAAGCTGAAAAGGAGTTCCATCTTCTTCCAAGAATTCCTCCCATATGTCATAGATAAGTCTGCTGTCTAGAGATAAGCGCGCGCTCAACTGT	030	AdaLead (G)	-0.0442168	5.23948	-0.139404
gosai_16172	GTGCCGTCAAGACATACCTGTCAGTGGCCCATGCCGTTGAATACCGTCTGAACCGCAGGCACATCTTATCTTTGGCGCCCACACGCGTATCTCTTATCTTACAAGCAGCTGTTTGGCGCCACAGTATCACACCTTGGGTTGCCGTAGCCGTCGGGGCTAGTTCTAGGAAAAACCTACTTATCAGATAGCCAAATTTCCCG	030	AdaLead (G)	0.0858125	5.03822	-0.341808
gosai_17195	TGAGCACAGGTATGTGGCGGGAATTTTTGACAGCTGCAGAAATGACTAAGGAGTTAGCTCAAGTCTTCAAGGTCATGAGGGAAGGAGCAAGACCTCCTTATCTCATGTCTCCACACCCGTTTGGTAGACCAAGGGGGTTGAGTTGAGTGACGGTTCTAAGAAATCCCACAACTGTCAATTTGGAGATAAACCTTGACAGC	030	AdaLead (G)	-0.0384562	5.04529	-0.294285
gosai_18501	GCATCTACCTGCGCCACCTGTCAAGTCTGTCAAGTGCTTTTTCGACGGTAGTTCCCGCCACTTGTTATCTTGGCTAACACCCATTAGCATCTGTCAAGGGCGGCAAAGCGCGACTTATGTGAATACAGTTTCTAGAATTAGAAGGGCGTCAAAATTCTGAGAAACATCTGTCTCTGGAGATAAGCAGTCTCTGGGCTCTG	030	AdaLead (G)	-0.193066	5.21264	-0.433345
gosai_18123	CCTCGCTTATCAGCGCTACTGCAGGGTGTGGACCACACCCAAGGCGCGATGAGTCATTCCAGCTGTCAAGTCGCTTACAAGTAAGCCTTCTTACTGACAGTTCTGGACTAACTTAGATAAGGACCTAGTGTCAACCGCCAGTGCTCAATGAGCACCTACCCATTGCACCTGTCAAGTAGGGTTCCCTAGACGGTTGGTAC	030	AdaLead (G)	0.0221952	5.19339	-0.634375
gosai_19625	CTCCTTATCTAGCCTGCCACACCCAGGTGTTTGACAGATGCTACCACATGCTTACTTGACAGTCACTCAGTGACGGTTTTGACATTCTGCTGTCACTTGCAAAAGTAAAGTGACAGAGGGCACATGTTTCTGAGAGATAAGCAAATTTCCCGCCAACGAAGGCGTTGACGGCTCCACCCGTCTTAGGGTTGCTAGATTGA	030	AdaLead (G)	0.115059	5.03354	-0.247854
gosai_19491	CCTTCCCCATTGCATACCTCAAGGTGTGGCTCAAGATAAGACGGCTCGACGGTTCGAAAAGCGCGCCAAAGAGCAAGGGGGCTGTCATGATCTTATCTAACTAACCCCCAAGGAGACTTTTGGGCTTGTGTTGGTGATAAGTTGACAGAAGTCTTATCTTTGCATGCCATATGTTAGCCTCGACGCCGTCTAGCATTTGA	030	AdaLead (G)	-0.0237932	4.89051	-0.422805
gosai_19916	CTTCGAAAACGCGGGAAAATGCATTGGCCAGTCCGCAGGTCTTCGACGTGCGCGCCTATAATGACTGATGTCAGACGGCTGTCATAGACTTGACCACAACGGCCCCTTATCAGTTGCACACAGATGTTTCAAGGGGTACCTAGAAATTGTCACCCCAGAGTGACCGTCTTGACTTCTTATCAGTTCCCCAAGAAACACAT	030	AdaLead (G)	0.180166	4.95723	-0.382637
gosai_19537	TCGAATTTGCAGGTGGCGGCTAGTATTGGCGGGAAGAGCCGTCGAATGCTCAACACGCATTCTTATCTTAGGGCCCATCATATACAGCTGCAAGCCTAGATAAGTGAAGAACCTGACAGTTAGACTCTGTTATCAGTATATGCAGTCACGGTGTAGTTGACAGTTCCAACTCAATTATGAAGTGGCGGTCAATTCTTGAC	030	AdaLead (G)	0.310095	4.82848	-0.567517
gosai_18959	CCTCTGGAACATGAGATTTCCCGCCAAATAACCGCAATGACAGCTGTCAAATGATAGCTGTAAGTGTGAAGGCTGACCCGGGCGGTTATTCCGTTTTAACAGATAGGGACAATGATAACACCTTGGAGTCACCGTTCTGTCTATGGTAGGATAGATAAGACACTTCTCAGAAAACCGCCACATCCCTAGACGTGTGATAA	030	AdaLead (G)	0.125939	4.96589	-0.553227
gosai_17626	TCCACCTGTCACAAGCACCTGATAAGCCCTAGACGGCGCGCACTCAAAGTTGACATGCAATTTCCCGCGCACTAGGGATCTGCCCTCAAAAATGCAACTTCTTGAACAAGTCTTTATCACTTGGCCCAGTCTGGTGCGAAAAGATAGCATATCTTCAAGGAGATATGGAAATGTGACTCATCCTTAAGAGGTTCCCCATC	030	AdaLead (G)	-0.0465412	4.91891	-0.450216
gosai_19994	CCCCAACCGTCGAGTCAAGATAAGTAGCTTACTCACCAGACGCTCTTATCAGCATCTTCCAGACGGTGACTTGTTGCATAGTTCCTTCCCGCCCCTAAGGTGCGACTCTAGCCTCGTCTTGTGTGACTGTCATGAACATAGTCATATCACATCAGGACAGGTGTGGTCCACTAGATCACACCTTCTCCCTGGTTATCTCA	030	AdaLead (G)	0.0125381	4.9047	-0.611353
gosai_18841	TCGAGGAACCACGCCTTATCTCATGCATGACAGCGCGGGAAATATACCTGCGAAACGTCTTGTTCGCACCTCCAAGACATAAGGGAGGAACAGCCGTCGGATCCTCCTCGTGGGGGCGGTTGGAGCCGTCCACCTATGTGGTGCAGTTGAGATAAGGACCACACAGCCGTTTGACAGCTCTGGTGGAGCATAGATAAGAG	030	AdaLead (G)	0.120876	4.83201	-0.604407
gosai_18003	TCGAACGATACCAGTCCTCTAGCATCAGCCGTCGACCGCAAGGTGTGACACACCCTATGGTCCTCCTCGTGGTTCGCGCCAAGAATTTGCATTGACGGTTAAGGAGCTACTTATCAGTTGAAATTGACAGCCTGGGGGCGGGTGGCTAAAGTCAAGATAGTTATCTAGCCAACTTTCTATCAGTAGCCTCCAGAACCGCA	030	AdaLead (G)	0.0843564	4.80705	-0.500727
gosai_18758	TCGAGCACCTCGAGGAAATGTGCGTGGCTCGCATCTGGCGGGAACTGATAACGCTTGGCCAAATGACAACACCCCTACTAAGTAGACTATCTACATAGAACATATGTGTGTCTGGTGGTAGGGGTTGATTAGGTTCACCTTGCCTATGGGTTGCCTGCTGTCAAATAGATAACTCCACTAGCCACCTCCGACGGTGTGGA	030	AdaLead (G)	0.0805837	4.8596	-0.636774
gosai_16161	GCAAGGCCGTCGAAGAAAGCACTGCAGCACGTGGCGTTGGTGTTAATCGCAGTAGAGCATCACACCTGATAGATAAGGGTTGACAGTCCAGATGGAAGATAGACCCATGACTGTAGTATCGCACCAAAAGTTGGGTGTGTCAGTCTAAGAGTAGCCTTATCTAGCAGATGCAGATGCGGCCGTTCGAGGTTTATCTTAGT	030	AdaLead (G)	0.0988622	4.8551	-0.621562
gosai_17516	CGAGGCGCGAAGCGCTTGAATTGGCAAGGTGCGAAAGTCTTGAAGCACGTGCTCCTTGGATGCTGCAGCAGGGTTCCTGATAAGGGACACACGTCTTCTAAGAATTATGCATGAGGCACCAGATGTTGGTGATAAGACAACAGTTGGAAGGAGCTTATCAAGTAGTTCCCACGACGGGCGTAGCTCTTATCTTCTAGAAC	030	AdaLead (G)	0.00618889	4.59411	-0.548589
gosai_17907	CACCTGCGGAGCATCCCGCGCACGTGTCAACTTTTGACAGTTGCCGTCTAGCATCCGACAGCCAACTCCATCAGTAGATGCCTTGACAGTTGCAGTTAGAGTAGGCGGGAAACCTGTGTTGAGGCTGATAAGGACCACTTGCGGTTACACCCAACCCATCATTGGGAGCCTTGACTGATAAGAAGAAGGTGGGTCCCGTC	030	AdaLead (G)	-0.0409868	4.67106	-0.52685
gosai_17663	ACGTCTGTTTGAGACAGATAACAAGGGCGGGAAACTCGAAGGGTACGATCCAGCTGGACAGGACACGATAAGAAGAGGTTGACACCTAAGCCCGGATAACTATCATGCTGGTTGCCTGAGGGACAGTTGGTAGTTCTAGGAACTCGTACTAGAATAGGCTCTTATCAGGTGCAAGCATGTGTCGTTTGACACCTCAATAC	030	AdaLead (G)	0.122083	4.70492	-0.603148
gosai_17966	TGACCGACGCAACCGTTATCTGAGTAGTTTCCCGCCTTAGAGTTCTTCGAAGGCGTGATAAGCACAGTAGATCCTTTGGCTGCCCTTATCGCATCCTCCAGACACACGTTAGTCACTAGCTGTCAAATGAACGTTCCTACTCTTCATATATTGGAGATAGGGTACCAACCTACCGTCACTGACAGGTAAGTCTAAGTAGC	030	AdaLead (G)	0.0931788	4.66528	-0.511239
gosai_19038	GGACAGGTGCATCGCACCTTGGCTATCCTCGACGGCAGGTGGTTCTAGGAGCATCTGCTGATGCTCTAGGGGAGAAGGAGACTAGATGCAGCTAGATAGCTGACCAGTCACTATTAGTAGGCTACAGCATGACTGGTGCAAAGAGATAGGACCACGGCCCTTATCTCCCCTTACCAGCTGTCACTACTTCTTGAAGCATG	030	AdaLead (G)	0.0567504	4.67436	-0.472876
gosai_18251	TGAGAAGGATGCCGTAGCGCGTTGACAGTTCCATCACCTCAGCAGACAACTCCAAAACCTTATCTTGGCTTACCATGCTCAACCGTCGGAACCAGCTGCCACTTATCTCTAGTGAACACATGTTCTGCAGCCGTCTAGCATCTTCCAGATAGGTGTGCATTGTACTGACAGATAAGCAGCACGTTGGCTTGAGATGAGGA	030	AdaLead (G)	0.0796184	4.5966	-0.549669
gosai_18258	CGTCGGTTATCAGGTGAGAGCAAGGTGAGACGATATGATAACGGTTATGCGACCGCTTGCACTGTTTTTCCCCGATAAGGCTTATCTCAAACCGGCAGCTGGGGGACGTACACACCAAGGGTCAACAGGGACTAGCCGTCGAAGATGCTATAGCATCTGGGCCAAGAGTACCCTTTCGACGTGTGAAACTTCCAATAGCC	030	AdaLead (G)	0.0656452	4.64608	-0.244595
gosai_19640	ACGTCTTGATAAGTTTTCCCGCGAAATTCGACGTGTGACATCGGTTGCCGCGCAAAGAGCGTTTCTTAGAAACTGTCATTTGACAGGACGGCGAGATAAGGCGTCTGACAGTTGGTGCACGGGGTGATAACGCCAAAGTACTTGTGGTGAGTCATGCCCCCATATTCTAGAACTTCGGTTGACACCTGTCTAGTGATGCA	030	AdaLead (G)	0.0210293	4.53748	-0.355257
gosai_18039	CCCGGTTGCGCTCCGTCCCGAGCTGTCAACACGTGTGTCTTTGGCACGCTCTTTTAGACGGGAATTCGAATTATCTTTCCAAGAACCCTAAATTTAGCCTTCCAAGAATTGGGTTATCATCAGACTCTTGACGGTTGGACGGCTGTCATATCTTATCTTACATCGCAGTCTGTCACCTAGCCTAGTGGCTAGCGTCTTAT	030	AdaLead (G)	0.0711132	4.56719	-0.255934
gosai_18567	GTTGGCCAATTGGCGGGAATAACAGTTGAGAAGCGCATAGCACCTTATCTATGGAGCACCATCTGGCTTTGACGGTTACAAGGTGTCAACACACACGCCAGACCTGTGTGCACATAGATAAGACCGTCGGTGAGTTCTAGGAAACCCATAGGGAATGACCTATTCCCGTCGAATGTCTAGAAGGCATGCCATGGACCAAG	030	AdaLead (G)	0.0611676	4.59482	-0.335107
gosai_18498	TCGAATAGACCAAGACAGGTGTCCAGCATCACCGCTGCATATCACTATCTGCAGGCACCAGATGGTGATGCTAGATACCGAGAGTAAGTGTGAAAAGATACACGCCCAGACGTCGAATGTAGCCCGGGATTAGAAGAGTCACCTGCGAGTCCTTATCTATTTTTCGCGCCTTTTGGCCTTAGTGGCCCCGAGCGATAAGC	030	AdaLead (G)	-0.0100673	4.44547	-0.39165
gosai_16303	CCTCCAAATGTCTTGGCGCGCCGTCCAGCGACCATCTGCTTATGCAAGACTTTATCGACGGACGCTTCCAAGAACCGCTGGTTCTGTCAGATAACTTATCAGCATGAGTAGGCCCATGACCAACCTATGTAGTGCTGACAGATAGCATCTGCACGACTTACTCGACGGGTGTTGAATGTATGACTTGACACTGACAGGTG	030	AdaLead (G)	0.0649196	4.55393	-0.381903
gosai_17304	CAGGTGTGACACGGTAGCGGGAACGAGCGATGCGCAGTGCTCACACCTCTAAGCTTCCCGCCAAATTGTAACTGGAGTGTTGGCGGGAACTGACAACCACATAGCCAGTTGGGAACTTCTGGCAGCTGCTGATAAGTCATCTAACAGCTGCCGTCGGAAGATAGCCCGGGATGAGCTATGGTCCAAGTCCTATGATAGTC	030	AdaLead (G)	-0.0165028	4.52491	-0.279919
gosai_19441	GCATGTCATACTCGACGTGCGGGACCGACTCTCCATCCTTTTGCAATAGGCGCGAAAACTGGATCTCATTGACACTGTCCATATCTTGTCTATGGGTGACACCCCTGGTCTTATCTTGTGTTCCACACATCTCCTATCTTCCAAAACCATATGTTGGGGTAATAGATAAGGTTCCTCAAGACCGTCTAGTCTTATCTTAT	030	AdaLead (G)	0.0179189	4.37716	-0.400223
gosai_17117	GCTGTCTAAAAGAGATAAGGCTATCAAGTGAAGCATCGCACCTCCAGAAGGTGCATGCTGGTTGGTCCTGTCATGCGCGTGCAGTTGACAGATAAGGAGTTATCTACGTCTTGCAGATGTGTGAGAACTTATCGATAAGCCCTCAAGGCGCGAAACTTATCAGACGTCGACAAGGTATAGCGAACAGGTGTTCTATACCG	030	AdaLead (G)	0.0269806	4.29833	-0.422204
gosai_17555	GCTGTCAACGGGTTTTGATGCATCGCCTCTACCTGTACGCGTGAATTGGGCGGGAAAAATGCATGCGCATTCTATGAAATGTTATCTACGGGTGCCGGGTTTCCCGCCTTTACTGCACTTGGGAGGGAGTGTTATCTCACTATGCAGCTGTCAGAGCTGTCAATGGGGTGTATTGCTCTAACTGTCAAAGGTTCTTATCG	030	AdaLead (G)	0.0702234	4.28976	-0.560657
gosai_17595	CCTCTTCCTCGAAGAATGATGCTATCATACTTGGGAGCACGTGCAGGTAGATGAAAAAGCGCGGGAAAACTGTTGACAGCTACAGCCGTATGACATTCTTGACATGTGCCCGCCAATTTTCGACGGGTGACAGCTGATAAGGCCGTAACCCTGTTTCTTGGAATTTGGGGCCGTTATCTCAGTTGACATCTGCAGTGCAA	030	AdaLead (G)	0.0587534	4.2768	-0.751423
gosai_18035	GTACGATAATCTGCATCCTACACCTTCCCACGGACCGACGGCGGCATGACTCACTTAGCGCCTCTAGCACATCTGCAGAAGGCAGATAGGCGCGATGCGATACTAAACGACGGTTGACAATAGTCAGGTGAATGACACCCACACATCTGCTCTAGAGATAACCGACAGCTGTCAACTATTCGACGGCGATAACACCATGT	030	AdaLead (G)	0.00511801	4.2202	-0.4573
gosai_16642	GCTGTGCTGTCCATCGACGGGCTGTCATGTGCGTACGAGCGATAAGCATGTTCAGCAGACTCCACGAGTTTATGGTAGGTGTGTGAACTCAGATAAGAGGCATTGGCGGGAAACACCGTCGAAGGACGGTAGGTAAGATAGTGAGCAGTGCGCGCCACTATCAAGGGGCGCCCCGTCGATGCTCATTATCGTTCTGCACA	030	AdaLead (G)	-0.0106792	4.19882	-0.38885
gosai_17242	TACCACCTGAGCTGTCAATTGCCTCGTGTCAACGGAGTGCCGTCGAAAGTGAAGAGTCATTGCGCGCATTATCTACAGATAGGCATCTGCGGTTAGTTGACAGGCAGTACTGATAAGAAGAGGGCTTGGGTACCTCCTTAAGAACTGTCACCTTATCTAGAGTACCCAAAAGTCTTAAGCACCTCGAAGCACGCGGGAAC	030	AdaLead (G)	0.0683259	4.24474	-0.589926
gosai_19111	CCTCACCTTCGACGTACCGTCCAACACTCTAGGATAGATAAGCATAGGACTTGCAAGGCGCGAAGCAAAACTTAAACTGTTAATGGTGTTATCAGTAGCTAACAGGAGCCGTCGAAGATGCTACTGATAAGTGGTACCCTCCTGTGGGCGGTTACACCCTCGCGTTATCAACCGTTATCATAGTGGACCACACCTGCACC	030	AdaLead (G)	0.0498213	4.22272	-0.509941
gosai_19105	GCTGGAGCACATGCACAGCTGTCACCTTGCCTAGCCGTCGCAGCGTGTTCTCAAGAGATAACACCACGCCCAAGCACCACATCCTTCGACGGGGGGGGGTTGAGTGAGACGTGTTCTGTCTTGGTACCCAGATAAGACGGTTATCATCGGTTGGGCGGGGAGCAAATGACAGCTCAGGTGCTTCGCACCTTTTGACAGTA	030	AdaLead (G)	0.0875702	4.15631	-0.410045
gosai_17052	ACACCCTCGGTGATGCTCAGGCATATCTGTAGAACACCTGTTGCGTCCGCTGATAATGACACACTCCTGACAGCTCGCTTATCGCGCCTAACCATGTTCGCAGACCACATGGTTTGTCATAGCATCGACGTCTCGCTGTTATCTTATGGACAGCAGGTTCCCGCGCACTCGGGTGTCAACTATCTTGATGGTACACACCC	030	AdaLead (G)	-0.150232	3.84128	-0.585105
gosai_17807	CGTCGAGGATCGAGAGCACCTTTACCTACGAGGGATGCTGACAGCCAGTTGACAGCTGTCCTTGTCATATGCATCAGTCAACTTATGGGTTGACACTTCAGATGTGCTGGGGCGATAAGCAAGCGTTTGCGTTAGCCCCATGGGCGTTATCTGCACGTGCCAGCTGTCACAACGGTTATGGAGTTGGGCGCGAGTTATCA	030	AdaLead (G)	0.00513964	4.11156	-0.361381
gosai_16429	GTTATCACCGCGTACACGCGGGAAACGGTTGACAGCTCGCGCCACCACGAGTGGATGTAGCTCTTATCATTTCGCGCCATCCGTTCCACTGGTACCACGACGTGCGATACGGTATCAAACAGAGTACCATATGGGTATGAACAGATAACAAGTGTAGTGGGTGTGTTTGACAGAAGTAGTGAGCTGTCAATAGCTTATCT	030	AdaLead (G)	0.0131421	4.00426	-0.405385
gosai_16545	GCATCACCTGCTGTCAATAGTGCTGTTGAGTGTACCAATACTCGACGTGTTAAGCCCACTACAGTCTTCAAGTAACCGTCCAACTGTCACAGTAGGGTGTCCTCCAAAGGCGTGGTGTGACAAGATAACACAGTTCCCGCCAAAAGCGGGAGCATGCAGCATCCCTGTGGTGCGATAAGATAGCAGTTGGGCTTATCACA	030	AdaLead (G)	0.063339	4.06317	-0.608248
gosai_19351	GCAGCCGTCGAGGTGCGAAGTATGCGCGGTGTAGATAATGTTATCAACTGTGCACCTCCCCATGTACTTCTCTATCATTTGATAAGGTGACCAAACAACGGTGTGAATAGTGGTTCCAAGTGATAAGGATAGCACGCCACCTCTTTCTAAGAAGTGTGAATCCTCCGATAAGGCGCTCTTTTTCGCGCGCTAATTTTGAA	030	AdaLead (G)	0.0131546	3.90107	-0.583863
gosai_16947	CCTCGCACATGGGCTAAATGACAGTGATAAGAAGTCTAGACGGCGCATCTGTCAAATATGACTCATGTTCGCTCAACAGATGTGTGCTACTAGATAATTATCTTAACCGTTGCCCTAAAGATGCTTTATCAGTGCTGTCCATTGACAGCGCGCATCACTATCGATATGACCTCGTGCCGCCCGTTGTGTGAATTTCCCGC	030	AdaLead (G)	0.012123	3.97488	-0.348689
gosai_18054	CCGTCTGGTACCTGATAAGCACTACTCTTGATCGCTTAGAGCGGGAAAAATTCTATCCGCCTTGGCTTGACATTCATGACTTGAGATAAGCGCCAAAAAACAGTTGACGCCTCTTGAAGATAAGCAAATGTGTCAGGCGGAGCTGTCATCTAGTACCGCCAGACGCGCTTATCGCGCCTCAAAATGCAAACCGGTGTGAG	030	AdaLead (G)	0.0141191	3.93456	-0.417478
gosai_18486	TCTATGCGATACCATATCAGCATGAACCAGCTTTCTCCATTTGGCGCGTTGCCTTTGACAGCTATCTTGACTAGCCTATTTTAACTGTCACCATCTGTCAAGAATTGACAGCGCGCCGTTGGCGGAGCTTATCAACATGTAACAGACGTCTCCCGTCGAAGGTGTGCTGAACGGGAGCTAACACCTAGACGGCCGATAAG	030	AdaLead (G)	0.0521057	3.94936	-0.446183
gosai_18742	TCTGTCAAACCTAGAAGTCGATAAGCATATGGCGGAGCCGTCTAACAGGCGTGTCGGGCTGATAAGTTAACGTTGGCTTCCCGCCAAACTACGATCCATCGAAGTTTCGCGCCTTTGACTCAGCGCCTAGAACCCTCATCACACACTTATCATTAGATGACAGCTCGCAATGACAGGTTCCTTGACGGATAGTGTTATCT	030	AdaLead (G)	-0.0274612	3.67599	-0.346649
gosai_18851	CCTCCTTGGTCCTTATCAGGCGCGAGCACATCGCGTTCAACCGACGCGGGAAAATACCCTTATCTATCATGCCGTTTGCAATGATCAGCGCACGTCGTCTAATTAGCAGCAATCGACGTCCTGTCACCCTAGTAGCCCAGACGTCCTGTCAAACTGATAAGGCGGCACAGGTGTGGCCGTCTGATAAGTCCTTATCGCGC	030	AdaLead (G)	-0.0233825	3.55336	-0.431988
gosai_19231	CCTTAGGTGTTATCAGCGCTCATGCCTGTCAATTCGTTGGGTGGAGCTCAAGCGCGATAATGACAACGACCGTCAAAAATGACTCAGCCACTCTTGACACTTATCGACGTGCGACACACCTAGGACCTCTACCACATTGATAAGCTCTTGCGCGTGGTACCTAGACGGCTCATTGACATTCTGGTCCCCAAGTTGGCATC	030	AdaLead (G)	0.0183342	3.35054	-0.524552
gosai_19158	CCCCGCAACGACACGCTGAAAGCGCGCGTCGAATATCTCCGACAGCGTAGGATCACACCGGCACATGGCCCTTCCTAAAAACCGTTGACACCCTTCCGACGCAGCAAGGTGTGAGATGCTGATAAGTCAAAAGTTCACGCCTTCGAGGTGCTGTCAAGGCTTGCTGACTCATCAATTGGGGAGTTCGCGCCTAACTTGAA	030	AdaLead (G)	0.16375	3.16571	-0.269036
gosai_19398	GTCCGCACGCTTGGCGGGAAATTAGGATCATTGACTGGGCGCGAACTTGCGAGGGAAGCAAGACGTTCGACGACACGCTCTCGATGATATCTACATACCCAAAAATTTTGGACAACGCGCGAACCACTTGGTGGTGTCAAGCATCACGCCCGATAAGTTGGCGGGAACCGTTGTTGCCGCCAGATAACGAAGGGCTAAGT	030	AdaLead (G)	-0.236801	3.01868	-0.257884
gosai_17811	TTTCCCACCTGCGCGTCGCATCTACACGCGCGCTCTACATATCTTATCTTAGTATGGCGCGCTCTATTTTTATCGGTGCATACCATCTGATGTTGATGCATGATAACGCACACCTTACTGTCATCGAATCCCATGTCAAATACTATCTCAAGCCACAGATGGTCTGTGACTCAAGCCTCGACGGCCTTATCTAGCATCTG	030	AdaLead (G)	0.00770655	3.2169	-0.395874
gosai_18449	TCGAGTAAAGTCAAAGCCGCGATAATGTCAACTCATAATTGAATTGCCCTTATCGTTCTGCACACACCTGACAGTTGTTATCAGGCTGACCAAACCCTAAGACATACTAAGATGCTAATGCATCGGCTGTGTCACTCATTCGGTTGCGCGCTTTCGCGCGCTGTCAAATTGCCGCTCATGTTCTCCTTATCAGCATCTTG	030	AdaLead (G)	-0.287204	2.41959	-1.0305
gosai_18848	TGCGCATAAGGCATCACCGTCGGTTCCACATTTCCCGCGCATTCTAGAAATTGCATGCTCAGAGATGCTAATTCCAAGAATTGGGACCCGATAAGGTCACCCTACTCATTGTGTTGCTGTTCCCAAGATAAGGTTGCGGTTGCCTCATTCAAGAATGACACAATTAGAGCATCCTAAGGTGACGTCTTGGGTCTTATCTA	030	AdaLead (G)	-0.16031	2.5216	-0.26228
gosai_19563	GCACGTGCATTGCTTGCCTGAGCATCACCTGTCATACAGCGCTGGGGATGTCAAGCTCAATGCCGTTAACATTAATGCGAATGAGAAACTCAAGCTACTGATAAGCATGTAGGTCCTTATCAGTCCATCTCATCGCACTTCCCGCGCCAAACATATGTGTAGGGCTGATAAGCATCTAGCATCTTTCAGTCAAGGAGTAT	030	AdaLead (G)	0.0681054	2.45725	-0.785215
gosai_19691	GTTCCCATCGTTTTCGCGCTTTCAACCGCTTTGCATGTGGCTATAGTGGCTACAACGGTCAGTACAACACCAAAAGTGTTGACAGCTCTCAAGTTGTCGTTTTGCCCTTATCTCTAGATATTGCCATATCACTATGCGCAGTGTCATTGTTGATGCGATAATGTATCTCACCGGAGCCGTCAAATGTTCGGCACGTGGCG	030	AdaLead (G)	0.0223416	2.38152	-0.709493
gosai_16623	TGACTAGGTGCCAATGATGCGCATCACCTGTCATTAGCGTGGAGTTATCGCTTCTAAGCATCCTGCACGGACTAGATAAGGAGTTCCCTAGCCGTCGAAGGAGCGATAAGAGTCATTGACCTATGGCCTATTGCAGATAGTACACTAGGTACCTAGCCTAGTATCCTTCTAGGAAATTATCGACGGGAGCCCGCGCCGTC	030	AdaLead (G)	-0.180345	2.46255	-0.858325
gosai_19423	TCGGAGGACTGCACGTGGAGATAATGGTACAGCGCTACACACCCTTTGCGCGTTAAGCATGGGTTGAGACTAGCCCTAGCTGTCAAGAATGTTCTATCAGATAAGATGACAGTTCCCACGCGTGTGAAGAAGATAAGATAAGGCACCTCTCGCAGAACCGGTTTGACAGCTGTCAAGATGCAGATAAGGAGCACTTATAA	030	AdaLead (G)	0.475653	2.23661	-0.377124
gosai_19556	GCTCGCGTGCCGTCCACCGTGCCCGCCAAATCTTCTACCATTCGTGGAACGGCTCCTATTTCTGAGAATAGCATGACAGTCTTCCTGGAAACTGCGCCTAGTTGATAACGGTCGGTCTATGTCCAGTTTCTAGAATTGGCGCGCCGAATGACAGCTGTCAATGACCAAGCCAATGTTCGACGCACATGTGTCGCACCTGT	030	AdaLead (G)	-0.311787	2.435	-0.635702
gosai_18228	TCGAAGTCAAGCCTAAGGTGACACATGAGTGGCCGTCGACGACCTGAGGCGTTCGCAATACCGTTGTCCCTAGTGATGTCTCATACGGTTCCCAGAATGGCTGAGACATTTCCAAGAACTCCAAAATGCCAACACCCTTGGACCAACGTCAATGACAGTTGGCCACTTTTGCTTATCAGTTCACGTCTAAGCTCATCTGT	030	AdaLead (G)	-0.223704	2.73054	-0.422753
gosai_17536	TCAATGCAAAGCACCTGTCTGGAAGGTGCGATAAAGGCCCCTCGGCGTCACCGCACCCTAAGCGAGCATCTGGATGGTACAGATAAGGTGTGATGCTGAGATAAGCGCGCGAAGCATCATATCTGTACCTGCCACAAGCTTATCCCGCTCCCTTATCTATAAAAAGCGCGGGACTCCAATTGACAGCTCTTATCTTATAC	030	AdaLead (G)	-0.416058	2.3807	-0.833366
gosai_17576	GTAGCGCGCCTTTTCCCGCGCTTTTCTCTCTAGCGGTTGATTGACAGCTTATCGGTATGCGCAGTCTTTCTTGGAAATTGGCCTCACCCATCAATTCCATGAATAGATGCTAAGATTAGCCTGGGGACATTGACAGCACACCTTGGATAGATGCATGACCGGCAAACGCTCGTATGCAGATAAGATAGCGCCAAAAAGTC	030	AdaLead (G)	-0.234659	2.08921	-0.761411
gosai_17841	CGTCGAGCATAGCCGTCGAAGGGTACCCACGTTATCAGCACTATGCAGGACCAAGGATGGCTATGGTAGCTTATCTCTACTATATGCATTTGACATCCTCAAATAGCATGTGCTCGCTGATAACCATATTTCATGGAACGCTGTCAAGGTAGGCGCCTTATCGCAATGACCAAAGCCCGACGCACCTTATCTCAACGCAC	030	AdaLead (G)	-0.191023	2.24349	-1.08944
gosai_19293	GCTCGAGCACACTTGGTACCATAATTTCCCGCCTTTTTTTGGTCGAGGTGCTAAGGCGCATTCTAGAAGAATACAGTAAGGTTAGGTAGCTATGATATTTCGCGCCTTACGGGAGCGCATTGTGTATATGCTGGCTGGACAGGTGTCAACCTAGTTCCAAGAACTCATGGTCACTGTTTCTAAGAATGATGACTGATAAG	030	AdaLead (G)	-0.0721549	2.23678	-1.00513
gosai_16073	CAGTAAAATAAGGCGGGAAAGTGGGAAAGGTGTGGGAACAAGATGAGATGCGCTTCCAAAAAGGCGGGAAGCACCTGTCAGACCTTATCTATTGAAGCATCCCTACCTAGCCTTGGCTAAGCCCTCTTATCGCAAAGGATGTTTCCTGGGGCTAGTCCAGTCTCTTGCGGTTGGAGATAAGACACAGATGCTTATCAGGT	030	AdaLead (G)	-0.0276997	2.19288	-0.825085
gosai_17093	AAAGCGTGCGAAAAACGCGTGGGCTGTCATAGGTGTGCTACTTATCTGCATCGACCAGCCCTAGTGTTCCAAGAACTGTGATGCACAGATGCGGACCACAACCCAACAAGCCATTAGGGATGTCTAGTAAGTACCATATGCATCCAAATGACCCAAGGGTGTCAAAGATGCTTATCAGCACTTGACAGATGGACCCTAGT	030	AdaLead (G)	-0.265356	2.18156	-1.14293
gosai_19582	CCCAAGCATCTTTAGTCATTAGCATCCTATTCGCGCGCGCCACGTGCATTGCATTGGGCGCCAAGACTGTTGAAGGTGATGACACACCTGCTTCTGGCTGTTCCGTCCAATGCATAAAGTGACAACCCTAGAGGGACTAAGGATGGTCACGCTATCGGTTTGGGCGCGACTCATCGCTCCAACTCCTTATCTTTTCGCGC	030	AdaLead (G)	-0.0345316	2.06762	-0.843696
gosai_17687	TCGAGCCACGCGTCGAGTGACATATGGGGACTGATAACGATAAGTTGGGTACCGGCGTCCCGCATCAACTCCTCATGATGTATGCTAAAAATAGCGCTACCTTATCAGTTGGAGGCAGATGACACCTGTCCAACCCACAGCATCATCCAGCTGTAGGGATGCTAGATAACATCTTATCTACTAGATGCACCATACCTTCA	030	AdaLead (G)	-0.375527	1.95775	-0.797346
gosai_17211	TCGAGTAATGACAGTCACATGTCATAAGGCGCGAACTATCGCTTGCAACCACACACGTCGAGACTGGCTAAGTCAACTCTTATCGCGCCAAAATGCAACAGCAGACCCATCTAGAGGTTCCTTAAGTGACAGGCTTAGTCATCATTGACCCCTCGAATAGCGTTGGTGTACCTCCAATATCTTGGGGTACCACAATATGA	030	AdaLead (G)	-0.358063	1.89376	-0.533821
gosai_19617	ATGCCCAGTTTCCCGCCCGTCAGTAGCCGCGCGCGCGCTTCGAAGGCATGCTAATCACTTCTAGCAGGTGGCTTGTCAATTTGCTTATCGCTTTCACCAGATCGCAGCTTGCTCGCAAGCAGCTGTCAGTCAAAGCATCTCACAGCCTCACTTGGTGACTCCTTGACACTTCCACGCGCGCTCTTATCGCACGTCTTTAT	030	AdaLead (G)	-0.00926159	2.71864	-0.54628
gosai_18774	TCGAGCGATAAGCCGTCGACAGCACATCTGCATTAGCCTGATAGTTTTTCCCGCCAAAGAGGTGTCATGGATGTGAGTCATCAAGAGTTCTAGGAGCTCTTCAAGACGTTGATGGAGCCAATTTTGACAAATGACATGCCCATCATAGACAGATGTCCCTTGATATCGAGTTTGACAGTATCAGTGATGCACAGATGTCA	030	AdaLead (G)	-0.532031	2.29619	-0.74956
gosai_17508	TCGAGGGCATCACTATCTCAGTACCCTTGGTTCGACGACGCATGCATCCACCCAAAGATGTACATAGTCATTGGCAAAAGTCTTATCTATGGAGCTGTCACCCGTGTGGCCGCGAGCGCAACTCTTATCTAGGTGTGACATCGGTTTGCGGCATCTTATCGCTTGCTGAAGAAACGTGCGTGCTATCTAAGATGACAGGT	030	AdaLead (G)	-0.22301	2.64806	-0.758213
gosai_19766	TGCTCTTATCTTGAGGATGCTCAGCTGTCGAAGTCCCTGACGGCCAGTTGTGGTGACAAGTGATCTTATCTGCCTTGACATTCTCCTTATCAGCAGGCTACAGCTGGTGCGATAAGGCAAGTCACTCACCTGACAGATCCATCCATTTGACACCTCTTGACATCTTATCAGATAAGCCATCACCGTCGAAGGTGTTATGA	030	AdaLead (G)	0.179047	2.08257	-0.912241
gosai_19828	TCGACGGGGGTGCGCACATATGTTGCCTATTAGATAACACCTCTCCTCCTTATCAGCATGACAGGTCCCCACTGTGGATGGGTGATTTCGAGATAAGACTTCACTATCACCTGTCAAAGTGGTTCCAACCGATATCTGTCGCAATTCTTAGAAGGATGCTACCCTAGTTTCCCGCCAAAATGTTAGATTAGCATCTGGAC	030	AdaLead (G)	-0.347849	2.02743	-1.05523
gosai_17324	GGAGCACCTGTCATCACAGCCGATGTGCTCAATGCTGATAAGGAGCATCAAGCAGATAACTTGAGTCAATGGGTGTTGCTGTCAAGTAGCTCTTATCTGGCTTCAGCAGATACCGCAGTCTTCTGGCTACGTCTTATCACTTCTAGCACTTGACACCTAGAGACTTATCACACCTCGACGGCTCGACCTTGCTGTAGTAG	030	AdaLead (G)	-0.12428	2.39605	-1.08513
gosai_18096	CCTTCTGCACGTCGAAGTGCACGCGCGCTATTTTTCCCGCCAAATGCCATCGCAACGAACCGCATATCTATTTCCATGTCTGTTGGGGTTGTAGATAAGACATTGCGCTCATATCTTGCTTTCAACACATGAAGGTGTGAGTGGGGTGCTGTCAGGAAAGAGATACGGCTATTGACAGCTCCTAATCAAGAGTCGACGGC	030	AdaLead (G)	-0.10164	2.67248	-0.760784
gosai_19213	CCTCCGAAGAACACTTCCCGCCAATGAGGATGCTCAACCGTTTGCGCGCCAACACTATCAGTTAACAGCTGTCACTTCGTATCGCACCCTGAAATGTTATCTGCCGTTGCCTAACCGGTTACACCCCTGTCATTATCACCGGTACCAGAAGAGGTGTGATAAAAAGCAGACTTGACACCTTAGGTGCGGTTGACTCATCC	030	AdaLead (G)	-0.300274	2.02618	-1.15932
gosai_17837	TCGAACCTAGGAGAGTCGGCTTGCAATGATACAGGTATGCTAGCGCGCGCCGTCTGTCAACGCCCGACGGTATGATGCCGATAACGATGGAGAGCCAGACGGTGACAACCCCAAAATAGAACATCTGCACCACTTCAGTGGCAAGGGCCTTATCTTATCAGAACAGGTGTGCACTAGAGATAACGAGTTTGTTGAGATAA	030	AdaLead (G)	0.350854	2.27421	-0.647479
gosai_16221	TGCGTCGAGGTGCGAATGGAGCTGTCAGCGCGCGAACCACGATGCCATTCATGGCTTTACGGGGCAGATGGAACATTAGAGATAAGAAGTTGACACCTCATACACTCGGCAAATGACACTTCTGGACACGCTCGATAAGCCCTTGTCACTCTATCACTTGCGGTTGCGGCAATGAAGGTGTGAAAGTATCTTATCATAAG	030	AdaLead (G)	-0.411078	2.07244	-1.10704
gosai_19081	TTGGCGGGAAATTATCTGTGTCACACGGCTGTAGATAAGCGCGCTTGCCAAAATAGATAACATGTAGCATCTTGGGCGTGTCTAAAGCAACAGTCAGAAGCAGGTGCATCTGCAAGGTGTTAACTCGACCACACTCTGCAGCTGTCAAAGAGCCACACCCATTTGGGTGCTATTTCTAGGAACCACTTCGCACGTCTAAG	030	AdaLead (G)	-0.468445	2.02903	-1.05594
gosai_17603	GCTCCTTATCACATGCACGTGGCGTCGAAAGGCACGTCTTATCAGTACGCAGACAAGTTACTAGGAAATGTCATGCAACTTTACTATCTTTGGGCTAGGGTACGGCAGGTGATGCTCTTGATAGAATGACACTCCCGCCAAAATAGGGAGCCACCCAACAACCACTCTTATCGTCAAGGCGTCAAGTCTTCTTATCTTGT	030	AdaLead (G)	-0.238982	1.93028	-1.18755
gosai_39193	GTTCGCACCTATGAGCAGCTTCGAGTGTAAGTGACTTACTACGTTACCCGTTGCCGGTCAGTGGGTGAGACCGAAAAAGAAAACCTCTAAGGCAAGCCAAAACCCTGACCCGGCCGAAAACATCTGGAAGCAGCTGATAACCAGAAAGCTGAGGGTGAGGATGCATCTGGTCAATAGAGATAGCCTCTTAGGATCTGTCA	030	FastSeqProp (G)	0.00978391	5.29106	0.499727
gosai_37936	TCTAGGATTCAAGCTCCTAAAGACGGTTTCTTCGGACTTACTGGTCTCCGCAGTAGCCCCATGCAACCTTCGCTCCTGATTTTAGGTCAGGTCCCGGGCCAACGGGACAATATAGTGCGGGCAGCTCCTATTTCTTAGGGTGTGGTCCACACCCAATTCTAGGAACTTGCATTGTCATTAGGCTAGAGCGGTTAGATTGA	030	FastSeqProp (G)	0.341243	5.57933	1.08148
gosai_34846	GCCGATAAGCGAGTTTCCCGCCAAAACACCGTCTGCTGCATATAGATAAGGCGAACTTACCAGAGTTAGAGAGCTTCAATAGAAAGTGGCCTGCTCTTTTGGAATTCACATTAAGTAACTGGCAAACATCTGTTAGATGCTGTCAAGCTCTTCTGGACGTCCCAGATAAGGAGTTAGGGGGCCCGGGTGTTACGCCTTAT	030	FastSeqProp (G)	0.269431	5.46801	0.102906
gosai_37882	TCAAGTTCAGGGCATTGCCCTGCTGAGTGGGATCCGAAGATAACCGTTCAAGTTGTAGCCAGGTGTTGGGACCTTACAGCCAGTTGAATTAGGTAGAAAGGGGGTGACGGGTTTAAACATCAGAAGTCACAAGTCTGCGTCTGCACTTCCTAGATAACGCCTTAAGGCGTTGAGACACACCATCGATGAGACACACCCCA	030	FastSeqProp (G)	0.303246	5.49037	0.973575
gosai_41324	TGTCCTCCTACCCGATTTACTCCGCCGTCGAGTGCTGAGCACAGCCACTCGGATATAAGCTCTGGCTTTTTCAGGATTTTGACTTAAGACAGACGCACCTAATCTGGTCCTAAGTGTAAGTGCGGCGTACTTCCAAGAATGCCTGCATAAAATTTCTAAGAATTGCGCCCCCACGGACTTCTGGTTGGGGGAGATAGCGC	030	FastSeqProp (G)	0.116652	5.46986	0.771882
gosai_39679	AAAAGCCGAATAGGTCAGCCCTCAAGAAGTCAAATTCTACTTGCGGGCCGGAGATCAACGCGGTACTAATCTAATAGTAGGAAAGAAAGGTGAACAGGCAGACACTCACACCCCTTATATTGTCCAAGTTCCTAGAAGCCGAATTCAGCGTTGGGTGTGGCCCCACTCCGAAACCATCTGGTGTGAAGAGATAATATCTC	030	FastSeqProp (G)	0.791077	5.83797	0.904699
gosai_40934	GTTTTGGCGGGAAAATATCTAAGGTGAGATGAGCTTGCGGATAAACACGGTAGTAGAGTACCGGAGCCAGTGAGAGCACCAAAATGAATAGTTTTCCGAGAATGGGAATCGGCCGCCAAGACGCCCCGGAAGCATCTGTCAGTCTAGATAAAGTCAGTTGCTCTGCACATAGATAGTCTCACCCCCCATCTGTCAAGTCA	030	FastSeqProp (G)	0.540055	5.58767	1.48923
gosai_37602	GCTAACAGCGGGCGCTTGGGTGAGTCACTCCCGTCTGGGCAAGTGCGATAGCGGGTTTCACTCCACCACACCCACGCCCACACTCTTCTTTAGTAGCTTCGTGTGATGTGATAGGAGTTCTTCGAGAGTAGTCAGAGGATGCGAGTTTTCGGTGGGCCGTTCTGCACGGTCGCACAATCCTAATGTTCTCACTAGTGTGG	030	FastSeqProp (G)	0.29914	5.2264	1.38965
gosai_41490	TAGACGAGACCTACGCTCGGGAATGCTCGGTGAAGATGGAGCAAGGCCACATCCATGACCTTCGACTTGCAGGACTAAGTCATTCTGGGATTTTCAGCACTTTTATGATATGGGGTTAACTCCTCCTACGCCTTAAGTAGTCAACAATGTGTGTTAGCAACTCCCCTCGAACGTCTGGTTCGCAGCGATAAAGGCTATCT	030	FastSeqProp (G)	0.382933	5.22034	1.09139
gosai_37872	TAGAAGACCTTATGCACCTTCTAGAAGGACATGGTTCGTACGATTCATAGCACTTTTGTGACTTACTTCCGAGTTGTTCGGCGTTTATGTTGTCCCTCTCACTCTCGAAAACCCGTAGGGTGTGTGTGTTGCCTTGATAAGGATTGTAGAGACACACCCAAGCTAACATCCCAAGTTCCTTAAGAGCTGCAGTTCTCGCA	030	FastSeqProp (G)	0.2288	5.05405	1.10065
gosai_40180	TGGTCTAAACACGTGGAAGGAGACATGGGCTCCTGAAGATTCATTCAAGAAGTTACCACATCTCATTTTCTGGAACGGAGAGCCAAGTCATAGCTGGTATATACAAACTATGACTCTGCAGTTAGTTCGCCTCCTAGTTCCTAGAAGTGGCTTCTCAGAATTTCCTAGAAATCTTCTACGTGTCAATACGCCTGGAGGCG	030	FastSeqProp (G)	1.10002	6.04039	1.47384
gosai_39382	AGGTGCGAAGCACGTGCTTCGTCTCGCCAGAGGCACACAGCCCCCGTAGCGGACTTCTGGTCTGCCCCAATCCTCTCTCGAGCTCCCACGCATGTATCCCTGAACCCTATATGGTAACCCATTACTGCGCGGGTAAGGATGTGTGAGTGAATTTATCCAGAATGCGGGGGGGCCGGAAACATCTGGTGCGTATAGATAAC	030	FastSeqProp (G)	0.818893	5.48577	1.35528
gosai_35659	GCTGTCGAAGATGCCTCCGGTAGGAGTGTGTCCATTCTACTTCAGCTGAAACGCTTCACTCAGTCATGGACATTCCACTTACTAACTGTCAACTATCGGATGCACCTCATCGGCTGATTCTCAGGGAACACGGGTGCCGGACCATCTGGTCCCGTAAGATAACAACTTAAGGAGCGAATGACTAAGCATTAGACGGGTCA	030	FastSeqProp (G)	1.03245	5.65407	1.32953
gosai_39717	ACGCGCATGATGCTGAGCTATGCTTGACTTTGTACATACAACGCCCTATTAATGTAGAGTATTTTCCAAGAACTCCATAATAGTGCAACGAGCTTGTGCAACTCCGCTGGGTGCGAGTCAGAAAAAGATACAGTCAAGCACTTGGGACCATCTGGTTAGGAGCGATAACCACATTCTTAGTCACACGCCCATTCGTGCGC	030	FastSeqProp (G)	0.190552	5.36481	0.741715
gosai_38076	TTTACCGAGCTGGCCATTATGCGGCCACGGTATGTGCCTCAGTTTTATTGCATCGGTGTTAATATTCAGTTGGTATCTTGACATATGAGAAAAAGCCTATCGATCGAGTTGCATGTTAGTGGAATGGTGGCTATTTTCAGGGTACATCTGCATTCAGATGATAACGGTTCACACCCACACACTAAGGATGACTAACTGTT	030	FastSeqProp (G)	-0.0123888	5.09947	0.802483
gosai_37214	GCTTGACAGCCGTCGACGGTTCGACGGCCGGATCGCCTTATCTGCACTCCCTAGATGTTGGTAATCCCCTCGTAAGCTGGCAACTGGTCAGGCTCCCCAAGGACTAGGGTATGTTTAGGTTATTTGGAGCTGGACCCAGCAGATAAGTACGGACCCTAGACATCTGTCTAACAGAGATAAGACGGTAGTCTGTCAGTTGT	030	FastSeqProp (G)	0.513814	5.37284	-0.428141
gosai_39634	ACGCGCGAAGCACATGCAGTCACTTAGACTACCTATGTACGAAAGGGTGGGACTGGAGAGCAGTTCCCCAAATACAGTTTCAAGGTACGGTTTTTGATGCGTTTCAATGGCGCTCCCCTACCCCTTGTATGTTCAGGCTTTTTCGTATTAACATCGGACACACCCCCACGGCAGAACCATCTGGTTCCTGCTGATAACCG	030	FastSeqProp (G)	0.415849	5.55733	0.573593
gosai_34750	TCTAGGAACCATCGAGGAACTTGCAAGTTGGCTTATCAGTACACACAAGACGGGTCTGATATTCCGAGTGTGTCGGGTTGGATTCATGGTGCAAGGTATCGCTGGCCCTGCGTATGAGACTCCCACGCGGAGTAACTGGCTCAAACTTATCTAGACTTGACAGCTGTTAACCCTAGATAACACCTTGGCGGGAAATTTGA	030	FastSeqProp (G)	0.263413	5.25407	-0.430832
gosai_34651	CCTCGACTTGACACCTGTCGCACGTGCCGTCGAGGTTAGCCGGTTCATATGCTCAAGAGAGCAACATTTGAGTCTATATTCCTCAAGGGAAGACGCTGTGCCGGTGACAGTGATAACTTAAAGGACTATTGGCGGAGCCTGTGTATTCTTATCTGCAGACCCCAGCTGTGGAGTCTTGACAGTTCTTGGAAAGTGCTTAT	030	FastSeqProp (G)	-0.063712	5.2062	-0.329101
gosai_40306	TCGAGTGATAAGGAGAACGGCGCTCCCCCCTTCGCAGGAACTCTTGACATCTGGCGGCTAAGATAAGAAAGTCGGGAGCTTCGGCTACTTTATTCTTATGTTTGACAGCCAGCTGTCAACCCCAAAAGCAAGACTGGTTGTTTAATGTCTTATGTAGGTCTTTTGTGTAACTAGTCACAACCGTCGAAGGTGCTTATCAC	030	FastSeqProp (G)	-0.0348728	5.15808	-0.369147
gosai_33457	CCTATCTTCGCGCCTTCTGTTATGCAGAGATAAGCCACGAGTCGTGTCAAACTCTCGAGTCGGTATTTGAATGTGATGCACAAATTACATAAAGAGACGAGTAACCTATGCTCAGATGACTCTTGGGCTAACAGTAGACAGCTGTTCAGAGCGGATAAGACTTGACAGTTCTTAGAAGTGGCCACCCTCACCTCAAACCA	030	FastSeqProp (G)	0.0125768	5.20627	-0.246395
gosai_34727	GTTTTCCCGCCAACTGTCAAGCGGCCAAGCTGGCTACTGCAGATAAGAGCTTTGCGTTCTGACATTTCCAACCCAACCTGCAGGACCCCTATGTGTCCTGGCCACTCAGAGACATCTGGTACCTAGGGATAAGGTGCAAGCCTTAACCCAAATCTACTTAAGGTGTCGCTGACGAGCACAGCTGGTTGCGGCAGATAAGA	030	FastSeqProp (G)	0.0955066	5.37478	-0.395221
gosai_38221	TCTCTCACCTTAATAGAACGGATCACCACCCAACATGTGGCGTTCACGCGCGAACAAAGCAACATCCTCATGCCTGGTAACCCTATAGTGTCTATCAAAGCGCCTGTCACATCCCGGATCGCGCACCGGGTACAGCTTCTGCTTGGGTGTGATATCAACACCCCCTCAACCACAAACATCTGTAAGTTCTTGATAACGGT	030	FastSeqProp (G)	0.0339031	4.99933	-0.369745
gosai_33425	CGCCAACGTTTGACAGCTGCTGCAGACAGATAAGACGGTCTTACTCCCAACTGGGCGGTTACAAGCTAACACTGCCAAACAGCGTGTCTCGACTCAGATCACATTTAATGGCATGAAATATTCCTAACCCTACCAAAGCCACAGCGGTGAAGGTGTGAACTCGAGATAAGGAGCTGTAGAACCTTCGGTTTACTGGATGA	030	FastSeqProp (G)	0.115942	5.04599	-0.352942
gosai_34024	TCGAGGTGTGAATAGCACGTGCAGAGTGCGGCACGCAGAAGTCTCTTCAAGCCTGTCCTCTGTCAAGGATACGCGTTGCTCTCAGTGGGACTCTAAAAGTCGCCAAAAGGTGCTTATCCAGTAGCAACAGAAGTTCGAGGCTACTGGATTCTTATCAGCCCGCACCATATGTTCGTGCTGTCAAGCATTACTCGTCTTGA	030	FastSeqProp (G)	0.2216	5.27351	-0.243491
gosai_36999	TGTGGAGAAGTGAGATAAGACTCTTCGACGGTCACACCCGACATGAGAAAAGAGAGTGTAAAACCAGACAGCTGGTGTCTAGAGATAAGGCATAATTAGCCTTGCTGCCCTCAAGGGCTCTACTGGAAATCAGATGAGTCTGGTGTGCAGCGATTAGACGAGGAGGGACCACCTGTCCACACTCGACGCTCCTTATCTCA	030	FastSeqProp (G)	0.114461	5.01925	-0.330591
gosai_33669	CCTCGAACACGTGTGAAGAATGAAACAGTGAGGGCATGGATGCTCACTGTGCATCTGGACGATGCTGATATTACAGCTGGCAACTAAAGATAAGCGGAACTAATTATACGGTTACCTCCATAAGAAACTCGTGGTGAGGCGCATTTTTCTCCAAAGGTCTTATCTGCACTAGACAGCTGTCAAGTGCCATAGTCTTATCT	030	FastSeqProp (G)	0.0826653	4.97124	-0.401752
gosai_34646	CCTCAAGGGTGCGACCCGTCCACCTACCACTTCTGTGCCGGACAGCGTGTTATATGCACCTCTTATCCGCACCCAACAGATGGTGGCCGTCCCTTATCCTGTTATTAATACCACCTGGTTAGGAAGACAAATCTGCTGCTACAAGATAAGGAGCGTTGACACTTCTAAGAAGTGCGCACCTTATCTGACACGACCAGACG	030	FastSeqProp (G)	0.295858	4.8184	-0.519105
gosai_33906	CATTGACAGGCTTGAAAGATGACAGAAGTGCGATAAGATTTTGGCGCCCAACTGTCAAGCAGTCCCGTCGTGATATAAGGTATCTATAGCTTAGATGTTGCTGTCAAGAATTCGCCCAAAAGCGCGCTGACTCAAATGTGGAGTGCCCCAGAGATGGGGACTATCAGACCTGAACAGCTGTTAGATGCTGATAAGCTTAT	030	FastSeqProp (G)	-0.0768506	5.13403	-0.591752
gosai_35363	CCTTCTGGTGCGCAGCGATAACAAGCATCTGTCCGGTTGAGAGAACTGCGAGCGCATTAACCGGTCTCCCACGGCTGGACCCATTAGATAACGGTTGCAAACTGATATGAGACTACCTGCTACATCTATATAAGCATCTGGACGGATAAGATAAGATTCAAGAAGTCAACAGGCTCTTACCGACGTTTGACACCTCTTGC	030	FastSeqProp (G)	0.0221996	4.89832	-0.5136
gosai_40566	TCGACACCATATGGCACCTGCCAAAAATTGGCGGGAAAGAGTCCACTGCAGGTGCCTCTGACACATTGCAAACAAGACTGAAGGGAGGCTGCAGGCAGCTCCCGTTTAATCCGTGGTGAACACCACTCAACCCTGAAGCAACAGCTGTTCGGGGCAGATAAGCATGAAGCCAGTAGCATCTGTTACAAGCTGATAACTGT	030	FastSeqProp (G)	0.210241	5.08075	-0.44663
gosai_35029	CCTCGCGAGGCTCTTGACAGCTCGCCGTGGCTCTTATTCGCGCCTTCTGGTTAGGTGCGATAAGGGAACTTATGAGCGCGGTCCAGATATTAATTCACTCGCAGCAACCGTAAAAATGTGTCAAAGGAACGACTGTCCACCAAACTGGGGTAGTTACCCTTGACAGCTGTCAAACAGAGATAATGAGTTATCTTTGTGCA	030	FastSeqProp (G)	-0.0591659	4.83926	-0.588756
gosai_35506	CCTAGAGCACGTGTTGACACCTGTCAGACCCTCGCGAGCGCATGCTGTAGTACTTGTTTACTATAGACAAAAAGGCGTATTTAAATGCACATAAAAGGATTACCGTGGCCCGAAAATCTTCATGTTACAGTGCACGAGGATCGTGTGGCTGCTAAAGATAACCGTTATCTTCAAGGAACAGCTGTCAACTTAGCCATTGA	030	FastSeqProp (G)	0.0635365	4.86753	-0.548782
gosai_38987	GTTCCCGCGCCAGACAGGTGTGAACTATTGATAACGCGCGCTCGAGCTGTCGAAGTTGACAGCTGTGAAGAACCTAGAACTCGTCTGGGGCAGCCCACTATGAGAATGGCCAGGTTTGGGGCCGAACATTTGCACGTGTTAGCATCAGATAAGGAGAGGCTGACTTAACTGGACGGTCCTGATAAGCCTATCTATAGCGG	030	FastSeqProp (G)	0.0339443	4.7508	-0.660903
gosai_38843	CCTTGATAGCTTCGAGGCGCGCGACCCCACTCCTTGCCCCAGCCAGAGAACTTGTAGCTTCATCGCAAGCGGCATCTGGTTCAAACTGATAAGTTGGGGCGGCGGCGCCTCAATGGAGTGTGACATTGAAATCTTCTGATGTCCATCCTAGACATGTGGTCAAGACAGATAAGACAGCTGTCAACCCGTATCTGTCAATC	030	FastSeqProp (G)	0.0572054	4.71333	-0.597856
gosai_35733	GCAACACCCACTACCTTCTGTGAGGCGTGACACTGCAGGAGACATCTGGAACCAAAAGATAGTGACAGTTGGCGGGTTAGATGTGATATCTGTATTCAATAGGGTTGTAGCCCTAGGTTGATAACAAACCCAGACCTGCGGGTCGTAAGACAGTGCATCTCGCTCCACGTCAACTCGCGGATGGCCGCCCTTCACACCTG	030	FastSeqProp (G)	-0.013943	4.62121	-0.486301
gosai_34667	TCGAGGATGTTCTAGATCCGTCTGACAGGTTTTGCGCGCGCTATGTTATCAAGACTTGACAGGTGGACCGGTAAGATAGGATAGTGGTATGGGCTTTTGAAGCTAACGGTCAAGAAGAGCTACGGAGTCCACCCCTTGGAGGGAGATGCAAGTTATCAACATTTGACAGCTGGTAGCGTACGATAAGATGTTGAACTCAT	030	FastSeqProp (G)	0.0160931	4.7005	-0.560749
gosai_33483	GCTGTCAAGACTTGCACGTGCATGTCGCGCGCAGGGGTGTGCGCCCTGGCCAGTCTTGGACATAGTGAGTTATACTCTTATCCCCATCTGACAGATGGGCCGATCTGATAACACAGTTGACAGCTGAAGGACTGAGATAAGGACCTTCGACACAACGGTTCGTATCGCCAAACATCACACGTCTAGGGTGTCAAGTTTGA	030	FastSeqProp (G)	0.134516	4.72737	-0.537208
gosai_40658	CCTCGAGAAGCGCGCGAAGATCTATCAGCAATTGACAGCTGTCAAGGGGGGAATAGGAGTTTGGATGCACGAGCAATGACGGACTAGACACTATTAGCAATGTGGAGCATCTCTTCTGATGCTTACTCCTGCCACTTGGGCTGTTGTCTTTTTATCACCAGCAACCAGCTGTCAGTTGGAGATAACCTTATCTGGAGCAA	030	FastSeqProp (G)	0.101765	4.70594	-0.619482
gosai_34984	TTTCGCGCCCTTCGCGCTTCACAGCTGTTAGGCGTTGATAAGGATCCCTGCGTGACGGCTTTTATAGGATCCCGTGGCATCCTGAGGGGATTCTGTGTGTGAAAAGCTCTAGACCCAGTAGCAGCCTAACACCTGCAAGCCAAAGATATGGAGCGTCAGCACCTTATCTCCCCGCACCGGCTGTCAAGCTGGATAGCTGT	030	FastSeqProp (G)	0.0533007	4.60094	-0.436115
gosai_33937	CCTCGAGACGCGCTCCTGACAGGTGTGAATCAAGCTTAGACGGCTCATCCATGGATTACAAACACTCGCTCATTGTATGCACGGAACAGGCCAATGTTAGCATCCGTGAGGTCTACGCCACATTCCCGCCAAAATGCCGTTCTTACCCTCCGTCGAAGAGTCTTATCAGCACCCACCAGCTGTTAGCCGGTGCTTATCTA	030	FastSeqProp (G)	0.0158804	4.56231	-0.542896
gosai_35195	TCTCGCACCTGTCGAGGTCGTGGCCCCAACACACCTCTTATTCCTTCGAGTTAAACGTGGGATAGTTCCCAGCTTAGGGCAGCTGGTGCACACCGATAAGGAGTTTTGACAGTACCCCGAAAGGGGGGGCAATCTGTTCCGTAGAGATAACGATTAGACAGAGCTAACCGTTATGAGGTTCCCGCCAAAATTCTGATAAG	030	FastSeqProp (G)	0.027786	4.62078	-0.296662
gosai_34411	CCTGAGATTAGGCGCGCTAGAGGGCCGTTGGGGCATGCACGTCTCCACGCTTAGATAACAAACATCTGGACGCGATAGATAACAGCTGTCGACTGCATGGACAGTGACTGTTAGATGCTACACGTATCTGCGTCGCGCTGTCAATTCCATCAGGACTTATCTTGGGGACCACACCTTTGCAATGCTGTGAGGTTCTTTAT	030	FastSeqProp (G)	0.0064852	4.53772	-0.330774
gosai_39086	TCTAGGATCTGGCTGAATACACGACCGCGTGGACGTCTCTACCGAGGGTCAAAGCCGTCATCAGTAGAGGTACCCCGGCGCCCGAGGCTCCAGATTTCAACCGTCTGACACCTCCCCAGGTGACCACGCCATGTGGAAGCTGATAGCCACTAATCCCCCTCCAAACATCTGTTTCCTACTGATAACCACCTTTCACGCTC	030	FastSeqProp (G)	0.04762	4.58274	-0.235747
gosai_37195	TCTAAGGCTCCACGCGGTTATCTGTATTTCTGGCGTGTCGGTCCCGGCTATGACAGTTTGACAGCTGGTGAGATCAGATAGGTTATCATTGCAGACCACAACCAGGGTGGCTGATAATACCCCACGGCATCTCCAGAAACCGCTGGTGCTCTTCTGCAAAACGCGATAAGCGTTCGATTCTGCAATTGACAGTTTCCCGC	030	FastSeqProp (G)	-0.00274287	4.56073	-0.294515
gosai_39224	TCGAGGATCAGGTGCAATGCGCGCAGCCTGCACCCGTGCGAGGCGACGTAGCGAGGGCCAGCTGTCAATCACCCGGTACAGCCGTGGGTGTGGAATCCTTGGAATACCTGCGCCCTATATCAGGCACTGAATCGGCTGGCGAACACATCTGTTGAGGACCGATAAGTATCTTTAGACTGCAGGCTGTCAAGACGGTAAGA	030	FastSeqProp (G)	-0.00705231	4.46055	-0.443832
gosai_38953	CCTTCGAGGCTCGTCTAGGGCGCGAAAAAGTGTTCTCTTATCAGGCCGTAACAGCTGTCCAGCACTGATAAGGCGACGCGGGGTCTGCTTACCAAATGATATAAAATGACCCTGGGAAATGGTAATAAGAGATTGCCCCGAAACTTTTCAATTCGGATGATTTATTATCTGGCTTGAACAGATAAGGTGTTGACAGCTCA	030	FastSeqProp (G)	0.0679213	4.55547	-0.336795
gosai_35932	AGGTCCACTTGGCCTGCAAGTACTGTGCTGATTCAAAGAGACTTCTTAGTGTCTTAGCCCGAGTACAGTTAAGCGACAACCGAGATGACTCCTTTTATATCAGATTATATTTAGCATCCCTGTAAAGCATTCAATTAACACTCTTATCACTCCAGTGAGGGTGTGGCCCCACCCGCCAAAACCGTTATCTACTGCAACCG	030	FastSeqProp (G)	0.062389	4.48736	-0.296245
gosai_34266	GCACAGCTGTCGAGGTGCGATAAGTGCGTGACACGCCCACTCTTATCAGCATTTGACAGCTGTCCCTTATTGATTATAGGCCTGCATACACTGGAATACAGGGCATCATCAGAAATGATAAGAATCTCTTTATCTTGGGGCACGAGCCATGGTGCTAGTTGGACATCTGGTGGGTAAAGATAAGTATCAAGACTTATCAC	030	FastSeqProp (G)	0.0196076	4.38876	-0.456359
gosai_40464	GCTGTGACACGTCGATAAGCTGGTTGTATCGTTCGCGCCTTATCTTCATCGACGGACGGCTCCGATGAATGAAGGCCTGGGACTTACAAAGAACCCCTACAAGTATCTTACGTATCAGTGGTCCTACTGCCTTCATGTGAAACGGGCACCTTATCGGCCTTAGGCATCTGGTACATACCGATAAGTGTCAACTGTCACAC	030	FastSeqProp (G)	0.0072538	4.26458	-0.434207
gosai_34561	TCGAAGATTCACCATGGGACACATCTGTCCGGTGCTGATAAGCCGTATAGGAGCCCGACACAACAGGTCACAAACGATAAGGAGGGAGGGAACATAGCGGTCGCTGGGCGTGAACGCAGCGGCGTTTTAAACCTGCACCCACATACCGCTCTCGTGCCGCAAGGTGAGAAAGGTGTGAAAGCACCTTATCAGCCTCTTCA	030	FastSeqProp (G)	0.0641582	4.28053	-0.595737
gosai_34800	CCTCTGGATTAGGCTCAACTAGAGCCTGCGGCGCGTCTGGAAAGGGCTGATAAGGCGGGAAACACCATTAGGCGATTCGCTGCTAAGCCAGATAAGGAACCGAGGTAGCTAGCACAAGATGTGACTTGTTAAATTCCACTAACCTAGCGATTTTCAACTGTCACACCTGTAGGGTTGACAGCTCCTTATCAGTATCTTCA	030	FastSeqProp (G)	0.0566542	4.27276	-0.729768
gosai_34167	TTGACAGCTGTCTAGGATAAGATAAGTGACCCGGTGTGATGACCAGACGGCTGCACGTTCCTCGGAGGCGCATACACCCACGAGCTTATCATGACGTTCCACACGGTACACCTGCCCTTCACCGATAAGGAGCAAGGCACGCATCTCCCTCATTCTAACACGGACAAATGTGGAGGTAGCGATAATGCGCTGTCAACTCA	030	FastSeqProp (G)	-0.0283579	4.19046	-0.476107
gosai_38854	CCTCGAGAAGTTGACGGCCCACCACGGACCCTTACTCCTCTTATCACCCTTGCCAGCTGGTCCTAAACGATATGGCCTTGAACGATAAGTGACAACTTAAGGCATGATTGTACAAAGCATTTGCGTCGCAAAGACCGACGTGGTGGTCTTATCTATGTACAAGTGCTGGCAGCTGCAGTCAAACGATAACACCTTTTTGA	030	FastSeqProp (G)	0.0400159	4.2337	-0.36393
gosai_34410	TGTGACAGCTGTCAACGGTATCGCGCTAAAGTGCTGTCAAGTATTGTACAGTGACGACAACGAGTTCTGCTGTACGGCGATGATAAGGAGTTATGTGCGTAAAACAGGTGAAGGAGGATGATAGTGTAAATGTTCAGCTGCTTATCTGGGGCCTCCATATGCTGTAGAGCTTGACATCCACACCTGTCCTCTCTTGATAA	030	FastSeqProp (G)	0.0398259	4.2343	-0.602499
gosai_39112	GCTGTCAAATATAGTACTTCATTCAGGTGCAAGGCACTGCGAAACATGTTAGCCCATGCCGTAGCGTCGGGAAACAGCTGTTTCCGAGAGATATCTAATAACACCTGCATGGGGTCTTCAGCTAGTCCGCCTCCAGTCGCTTGTGACCACGGCAGAAGAGTTCCCTCTATCCCGCCCAGCTGTTATCTATAGATACACGC	030	FastSeqProp (G)	0.0471256	4.25797	-0.592839
gosai_34125	TCTAGGAAGCCGTCGAAGCGACTTATCAGCCCGCACCACATGTTCGACGCGTCTGGATCCGGCTGATAAGGCGATAGGGGTTGTGATAGCAGATAAGCCCAGTTGAGTCAAAAATGTTATCGCCGTGTCAAGCGCATTACTCGTTGACTCCAGGTGTCAACGCGCGAGGGACAAGTGTTCTTATCTCGAAGGAAACATCA	030	FastSeqProp (G)	0.0211038	4.11443	-0.42541
gosai_38682	TCGAAAGGTGTGATGGAGAGATAACCGTTTGACACGCCTAGGTCGTTATCGGCAATGGACAGATGGCCTAGTCTGATAAGAGGTTGCGCCTCGTATAATCTGGATCAGAAAGCAAACGATACGATATAGACAGGTACTTCGATCATGAGATCACTCTGCAGAACGCAAGGCACCCCCCTTATCACACTTGACAGCTGTCA	030	FastSeqProp (G)	-0.109562	3.83367	-0.489537
gosai_33054	GCTATCAACCGTCGAAGAGATCGTATGGTGGCTTCGGTTAGTCGGGCGAAGAAAGATAAGGGCCACGACCTATAAGAGGGACAAGTGCCATGAAGCCCCCCAGACGCTGTCAGCCAAAACCGTTATCAGAACTCCGCAGACTCGACGGTTGTCAAACTTCTCTCCTCCCTGCTGCCTAGATGTCCCTTATCTCAAGGTAC	030	FastSeqProp (G)	0.0156563	4.07755	-0.390923
gosai_34106	GCTCGCCCGTCGAAGACGCTTATCACCGCGCATCAGGTGTTCGCAAGTGATAAGAGGGTCGCGTACGCAATATTCGTCTCAGCTGTTATCTCTACACAGTTGCCCCGTCGCGTCGACATTCTGTGTGCACTAGATTTGGTTGTATAAAACCCCTTATCTTGTAGACCAGCTGTCAAACTGTGAGAAAAGATGCATCTTAT	030	FastSeqProp (G)	-0.00093722	4.02075	-0.382831
gosai_35168	CCTGACATAAGGCGGGAAATACAGAAGCTCTACAGCTCTTATCACCGCGGGTCAGCTGGTCCCGAGAGATAAGGACTACTACGAAGCCGTTGTCACCCTGCTGGACTTACGATCACTATCCGCATGAATTATCTCTAGGTTCACACCTGTCAAGCTGAGCTGCATCCTTGACAGTTGTTTACCTGAGATAACTCGACGGC	030	FastSeqProp (G)	0.115495	4.03505	-0.61507
gosai_33363	CCTCGCGAATTTTCCCGCCCTAAACGTATAATAACGTGCCGACTCTGAATGGGACAGCTGTGCTCTACTGATAAGGAGCTGTCAACTGGATGTGTTAGATAAGGAAATCAACTGTGACACTCCGAACAATAGGTAGGGGGTGGTTCTATCAAGACATAACGTTGACACCTGTTCGTTTCCGATAAGATGGTGCTAATCTT	030	FastSeqProp (G)	0.0135984	3.9535	-0.544737
gosai_39503	AAGGCTACGGAGCACCTTCGAGAAACATGTGCTCCACGTGCTTGCTACGTGCCGGGAGATACCAGGATATATTTTCTGGTCCCGCCTAGAATCTAATCAACTTATAGCAATGTCACAGCCAGTCGGCAAGGCGGCAAATTAGCATGTATATTTTACTTTAGCCTACAAACACATCTGGAAAGTGCTGATAGCGGGCGTGA	030	FastSeqProp (G)	-0.00564406	3.98042	-0.38641
gosai_37165	CCCCGTCGAGTCGTCGACGGTGCTAGGAGTCCTTATATATTTTCCCGCCAAATAACTTCACATCTGGCCCTTGATGTTAAACGCCTTATCGGCCTGGGACATCTGGATCACTCTGATAAGGCGCTCTGACAAAAGGCTGCATACACGTGAAAGCATGAGCCTTCACGTCGGTAGCGCAATTCAACACCTTATCTTATCGC	030	FastSeqProp (G)	0.0346579	3.95124	-0.459486
gosai_40430	GCTGTCAAACGTAGGCTAGTTATGATGAACTCTACGGTTACCGCGGCAGGGACTATCCTTATCAGCTTGCAGCAGATGGGGAGTGACAGTGACATCGGGCTCGTTGCTTATCTCCGGTCGTGAGCTGTCAAATTTAATGCGGACGAGTGCCAAACCGAGCGCAGTCGAAAACCGACGAGCACGGCACAAGTTGACAGGTG	030	FastSeqProp (G)	0.0267122	3.91154	-0.391121
gosai_41318	TACTCCTACTGCCTGTGACAGAGAGGGATGGTTACACACTTTACTCGCGGCATGAGGGATTCCCCCGTGCACATGGCTAATAAACCACCCGTAAATGATGAAGCTAAGGGTAACGCCGATAGACCTTTCATTCGACAGTCTTAGAGCTCGTCTAGCTTCTGGTCAAGTGAGATAAAGATAGACGCTATCTTATCGTAACA	030	FastSeqProp (G)	0.0466375	3.70999	-0.296748
gosai_40537	TTCCCTCGAAGGTGCTGTCACTCGTCTTATTGGGTCCAGGATACCTGCTTATCACTCCTGAACAGCTGTTGGTGTCACATTGTCGAAAGTTGCGGTCCGATGAGAACGTTGATTAGCGCATTTACTGCCACCTGTCATTCACTGGTCAACCAGCGTACCTACCAGCTTATCTGCCTTCACCAGCCGTCGGGTGACAGATG	030	FastSeqProp (G)	-0.0161463	3.55016	-0.553448
gosai_33244	CCTCGTAGGTGTGAACCTCGCGCTAACGCCTTATCAGCCTTCGACAGTTGTTAGCCGGTGATATCACTCCGATTGTGGGCCGTTGTCAAGCCCCGTCTGTAATGTTCCGATAAGACACATAATGAAGTGATTACTAGAGCAGTATCTGCTCGTAACACCTGTCGAAGATATCGGACGCGTCTTATCTCGTCCTGACAACG	030	FastSeqProp (G)	0.0226363	3.3974	-0.558489
gosai_37737	TCGAAGTTCGCGTCGAAGTTACTATCATGCAAGTGATGCTGGCTGACTGTGTGTTATGCAGTAAGATGTCGAATGGTTGTATGACCCAGTTAATAAGTGGTGCCCTGAAAGTGCGCCGCATTAGCCGGAGCCAGACGCCCCATAGCCTACTCAGTTCTCGGCGATAGTTCCTAGAAGGTGTGAGGAAGCGATAACGAGCT	030	FastSeqProp (G)	0.114244	2.99864	0.00327921
gosai_39080	CTCGGTCCCCCATGTGTCAAAATCCGACTGGTTCCTTAGTACGCAGCCCGCGCTCGTATTGTGGGCGAAACGATAATTGCCCAGCCAGGCCTTAGTATGAACGTGACAGTTCTTTGGGAGCTTCAGGGTGTGGTGGACAATTGACAGTTCACTTAGAGTTCCTAGAATTGTGGGGTACTGTCACACCCAAAATGCACTGT	030	FastSeqProp (G)	-0.0505096	3.12036	-0.132637
gosai_41013	TGGACTCACGGAGTCAGGCGGGAACTACAAGTCGTTGCAAGTGTCGACGAGGCAGGTATCATGGTATTGTGTACAATCCCGGTGCGGTTTGGGACAGCAGAACAATCTTGAGTGGTCTGAGTCGATACTAACCCATAGTCAACGCCCTATATCTTCTTCGAAGCAAGTCAAGGACCACGCCCACGCTCGAAGTGATGACT	030	FastSeqProp (G)	-0.0149424	3.09409	0.00954769
gosai_37722	TTTGCCACACGACGTCTGCTCAGCATTGATAGCGCGCTTTTTCCCGCCAACTATCCCCTCGGCCAGTCTAGAGTTGATGGAGCCTCTGCTGTGATGCGATAACGATGCGCGCCAAGCCTGAGCAGAATCCCTCACATGAGGGGCTATTGTACCGGGTCCGTCGTGATAAGGACTTATCACCTGTGTGTCGCCGCGTTTGA	030	FastSeqProp (G)	-0.348829	2.37398	-0.832469
gosai_35535	TCTAAGGATTGGCATGACAGCTGTAGTCTACACGAGAACAGTAGCAGCACAATTGGCAAGATCACCCGTTATCTATAGGCACCAGACGGTCCGCGCTGGTAAAAGGCAAGCTCAACCACCGTATTCAAGAGCTGTCAAGGGGACTATCGATCGGGTCCTGGTCTATATGCTCGTTTAAGACGAAAGTGATCGACCACACC	030	FastSeqProp (G)	-0.245048	2.51561	-0.221126
gosai_38038	TTCAGAGATAACACTATGGGCGGGACCCTGTTACTATCAAGGGTGTGACACACCCATACTACCTCCGTCTTAGCATGCCATGTTATCCCCCCAAACGTCCTACACAAAGGTCTGATCAAAACCTCGGTTGACGCTTATTTCCCTATACTGATATCGTTATCGCACATACACTTCTGCTTGCGGAGGGTGGCATGACTTGA	030	FastSeqProp (G)	0.0578811	2.44936	-0.314845
gosai_41288	TGGTCCATTGCTACGATATGTAGTGGTATCAGCTACACTTATTTTAGTTCAGGCATAACGTCTAAGGCGTTTTCGGCTAAAGATTGGCTTGTCCTGATCGACATCTTTCCGCTATGCTTCTAGTGGAGACCCCATCCGAGCTCTTTCAGTACCGGTACATCTGGTTAGGCGCGATATCAGAAAAGCGCCACTGGGCGTTG	030	FastSeqProp (G)	0.0315083	2.35193	-0.0091167
gosai_41330	TAGAGGACGAATGTAGTTGCTAAACGCATGAGCTACGCCTATCCCGTTGTAGGATAACTTTAAGACCATACAACCAGGTGTCACACCATGGCCTATTGAAGTTGGCATATGAATTACATCTCACCTTTGCCTATAGTGATACTGCGTTCCCCCCCGTTAACGGGGCGGGAACATCTGTTCGAGCACGATAAAGGATGACT	030	FastSeqProp (G)	-0.29428	2.27904	-0.894378
gosai_38421	ACTATCCCACCAACCTCATTTTTACCTCTGCCAGTTTGGTAACACATGCGGCAATGCCGACACCGCAGATAATGTGCACGACTAATTAACGACAGCCTCGTGGTACATAACGGCGGTCCGCCAGTCTCGACCGAGGCGCGCCAATTATCAAGGATTATGACTAAGGGAGTGGGGTGTGGAGTGTGATATCAGATATCTCA	030	FastSeqProp (G)	0.125748	2.38797	-0.287642
gosai_39573	ACGAGGAGCGATGCACGTAATAATTCGTATAGTTAGTAATGGGGCTGGTGACAGGTGTTCACGGCAGAGTCCATGAAATGCCCCGTTAGCGAGGTGGCGAGTATCAACCGGCGAGTAATGACAGACGACGGAATGGTGAAGGGTAGTGGCTGATATAGATATCATCAACACACCCACACCCTGGATGTGTCATTCATCCC	030	FastSeqProp (G)	-0.191188	2.35412	-0.75272
gosai_39558	AGGATCATGCTGCTCAAGAGGCCTGCATCACAGCCTCGGATTACGGGGTGGCCCGATAAACTATCGAACTCGCATCCCCGAGTTCCCAGCTGGAGGTACTCATGTTGTGAAGGGAACGAGGCAAGCGGTATCTCACTCCCATAGACAAAGCATATCAAATCCGGACTTCTGTACCCAAGCGATAACCAGATGTCTTACGT	030	FastSeqProp (G)	-0.108934	2.37542	-0.182232
gosai_35636	CGCCAAATTTGAAAGCGGCGCGCAATGATCAATGGGGCACCTACGCGGGGATCGCAATCTAATACGGCAGGCTTCCCCACCAACTGACAAAGGCTTGAAATGGCCCACCCATGTTATTCACACCTTGCTCCCCCGGGCAAGCGAGAGCAGTTGTTGACAGCTCGCTATCATTGAAAAACAGCTGTCAGAGACGTGTTAGT	030	FastSeqProp (G)	-0.221774	2.40956	-0.727573
gosai_35954	AAGTGGTCCATCGGTAAATCGAAGCTGCCGTCTCAGTAATACCATCACGTCGGAGGCTCCTATTCCCAATACCTTATCGAGAAAGTAACAACAGTCTCCGTCTTTATCCTCATTAGCCTACCAGACCATTATCTGGCTCGCCCATCGGGATTAACGTTTGCTCCCCCACTCGCAGGTGTCTGGACGGTGAGATAGCACCA	030	FastSeqProp (G)	-0.16474	2.28676	-0.751226
gosai_37634	CAAGGTGTGAACGGCCACGCCCACTCGGTTCCCTAGCTGATGCTTATTAGCGCGCCTAATAGTAGCATGCCAAACCCCGGCTGGCTCTGGCCCCCCCCGATCTCACAGACGTGCGGTAGAAACATGTGTTCAATCCAGGATATCCTTTTTTATCAAGCTATCCTATGCGTTCGGTAACACCTGTTTTGGCGCGATAATGA	030	FastSeqProp (G)	-0.217964	2.27058	-0.978429
gosai_35740	TCTAAGAGGCACGCGGCAGGCACGTGGAGCTGTCAAGTGTGTCTGCCACTCAGGACATCGACTAAGTGGGGTTAGATGGAAGACCTGACTAGTGCGTGTGTCAAAGAATTGATGGACGTGATGACTACCCGTTAGTTAGGCCGCGGAGAGCACAATTTGACGGTCGCGCCATCTGGTTAGAACTGATATCTATCTCGCCA	030	FastSeqProp (G)	-0.183258	2.22733	-0.826497
gosai_35827	TGCTTCTACGTATGTAATGACCAGTCGGCGTGGTATACCATTCGGATGTCGCCCCTCTAGGATCGCGCTAATCAAATGTGATACTCTGTATTAGAAAGTCCGCTAGGTGTAAGAGTAACCCACCACCATCTGGATCCCCTAGATAAACTATCTTTCGACCACACACGCTATGGGTCAATTCAGGAGACCTAGCGCTATCT	030	FastSeqProp (G)	-0.185216	2.25621	-0.654982
gosai_38065	GCGATGGCCGGGCGCGCCCTGGCTCATGACTTTGCATGGACATCCTGTATCCCACTCAATAATACAGGGTGTTGAAGCGTAGACACGATGCCTATGAATACACCTAATTTGTGGACACGACCAAAGGGAGTCATCTAGTCAGGTATTAGGTGTGAACCCCTCCATGTGTTATCAGCCAAATGCAGACGTGTGCTGACTCA	030	FastSeqProp (G)	-0.220142	2.12533	-0.891078
gosai_34275	CCTCTTATCGCGCCACACCCGTCGAATAATCTACCCAAAACAGCTGGGTACCAGCGATAACGGTATTGGCATAGCCCCTCCGACCTATCTCCTCCGGGACAGGTGGATCATGATTCTTAGAGATACGAGCCAGCGGACATCTGGCCAGTACTGTTAAGGCGTAGGGTTTCGACCTTGCCGTCGAGGTGTGAATTAGTTGA	030	FastSeqProp (G)	-0.156761	2.42083	-0.855556
gosai_39638	AGGTCCACCTGGTCAGCATCCCTATTCTCAGGCCATTAGAACCCGCCGTTTAATGCACTGGAAGGCTGGTTTTCGACGCACAAGTATAGCGCGTATCGGCACGCAGGTGATCTAGTGCACGTACCCGGAGGGCCACCTAATCGATCTGGTGAGGTGAGATAGCCTATCTCAACGCAACACGGTTATCTTCTTGAAACACA	030	FastSeqProp (G)	-0.226692	2.06654	-0.827042
gosai_41420	AAGCGGTACTTCCATAAACTATAGACTTCTCCTAAGTTCCCCCCGATGCGTAGTTCCGGATATTTACTAGAGCTACACCTACTAACTAACACTCGTATACTTAAGTTAGTATGAAAGGTATCGGCAACCCATCCTAAGGCTCGATAAGCCTCTATGTACGATCTAGTCGGGCACATCTGCAACGCCCCGATATGATATCT	030	FastSeqProp (G)	-0.0207942	1.92011	-0.100263
gosai_35439	TCGAGGTGTGATAATCAGGTACGATGCCAGCAGCAACCGGCACCGGTCCTTATCAGCCGCCAACAGCTAAGCCGTAGGCATAAGAAATCGTGTATCTCCATGAATCATCGGGACGACACTGATAACGGTGCTAGGGGTTGACATAACTATAGAGATGGCTTATCTAGATAGGCACAGACGTGCGAAGCTTATCACACCTT	030	FastSeqProp (G)	0.0650862	2.45087	-0.342065
gosai_35773	AAACCCACGTAGAAGAACTTTTCATGGTACAATAGAAGGGTCTTGGAGTGGTTGGTTAACCGCGTCAATTATATCTCCCGCACCCGCGAACACGTGCTGTTGGAGCCCAATGTCATCTAATCGTTCAAGTTAGTGAAACGAGAGCTAGGGATAAGTGGTATCATCGCCCGAGCTGTGGACCCAAGATAACACCACACCCA	030	FastSeqProp (G)	-0.322057	2.28507	-0.754386
gosai_39019	GTTGTCGTGTAGGTTGCAAAGACGTTCGAGGCGCATAAGCTCTCTAACTGACAGCTGCGTGCCTCGGAGGACGCGACAGTTAGCGGTGAGCTGATCAGGGACTGAAGCGTTTGGACATAGTCACGGCGGGTATATGACAGCTGTCAACTGTCAGACTCTGTTCAGCCAACTGTCATTCGCGCCAAAATGTTGACCACGCC	030	FastSeqProp (G)	-0.121857	2.41558	-0.719444
gosai_41018	TGCACGTGTTCGAGGATTTACGCGCGCTATAGGCGCGCATGACCACTCCCGGGTAAGATCCAGTCATGCAAATACTCGTTCGTAATGGTAGCTCCTAGGTCTGTGTTGGGAAGGTTAGATAAAGCCAAGATAGTAGTTATTAGAATTGATGAAAGACACTTCTCCAGTCTATAAGAGCTCCACCTAAAGGAACTAGAAAG	030	FastSeqProp (G)	-0.0378746	2.07588	-0.102227
gosai_39729	TCGAAGAAGCACGTGGCTGTAGCACGTGCCTCGTAAGCATCACCTCCGCTAATTGGCACCGCGTACGTCGCGCCAAAAGGTGTGTGCTAACCTCCCACCACAGATATCGTTGGACAGAACTTTATCCGTGGCACACTCGCACCAGCCAGCTGGATAGTGCTGATATCTAGATACTCACACACCCTCAGTCAGTTTAATGA	030	FastSeqProp (G)	-0.150804	2.09223	-0.933316
gosai_38332	TTTCCTCCAAGACCAAGCCGCTATCACAGGGGCTGCGTTAGGGAGCGGGCTCCTGGGTATAAGCAGAATTAAATGGGCTGCTCGAAAACTAAACTATTACCTATACTTGTCACCTTGTTCTGGACAGCGTACTTGAAAGACACCTACCGGATCCTCGGTCCACACCCCTGTTATCTTCTTCTCAAGGCATGGGTGTGACT	030	FastSeqProp (G)	-0.129832	2.24099	-0.670086
gosai_36342	TCGAGCAACGTGAAACGATGCTGAACGAGATTCGCGCTTGTACCTGAGTGGGAAGGCTTCAGATCATAGAATCGTCTCTCATATCTAACGCTCGCCGGTCGTGGCACGTAGCGTTGTTAGCACCTGCCTTGCAGTTGGATAGGTTCTAACGGTTCAGACGCCAAAAATTTTCGCGCCACAAAGCGTTCAAGGCGTGTCTT	030	FastSeqProp (G)	-0.135986	2.20049	-0.695541
gosai_37789	TCGAGGATGCTCTAGAAATGGCTCTATCCGACGGCCTCAGGTCGCGTAAATGACAGCACCTTAGGGGCTCGGCCTGTCAATTAAGGGCCGGGGCACGCGTATGAAACCTGTCTTCTTAGAATTACGGTGGTGCGGAGCTTTTTTGTGCCCTTATCGATGTACCACACCTGCTGCCGTTCTGACAAGATAACGCGCTATCA	030	FastSeqProp (G)	-0.201887	2.10573	-0.792679
gosai_37633	TCGAGCAACTCGCGGTCCGTCAACACCGCGTGTCTAGTACACGGCCGCTGAAAATTCTTCCAGGCATCACGCGTAGGTCACCTTATGGTTAGACTGTATGTCGCTTGCAGTCCCTCCGAAGGTGCTAACTACCTTTTAGGATGGAGCATTCGAGTCTAGCCCGTTACGATATCAGCAAAACCACACCCAAAGTGTTGTGT	030	FastSeqProp (G)	-0.0866924	2.25435	-0.507722
gosai_39336	AGGATCACGTCCTCATGTAGTTCGATGAGCGCGAGCTTAACCTTTTATATGATTCGATGCAGGTTTGACTATCATTGCTTACCTATATTATGCGATGTGGCGCCTAGATGTAGAAGTGCTAAGTGATAGACCCGCTATAGGTCTAGCCATAGTTCCACCCAAGGCCATCTGGTGTTGAGCGATAACTTATGGTCCACGCC	030	FastSeqProp (G)	-0.350096	2.05869	-0.778179
gosai_41242	TAGGCTAAAAGCGCGCGCGTTTAGAGCGCGCGAAAAGCGCGCGAAAAGCGCGCGCTCCAAGTGCTCTTGAATATGCTGCGATTGCAGCAGAACATGACCAATGTGTGATAGCACGTCCGATGTGCGGTTGTTCGAGTAGATAATCCATAAGCACGATAAACTTGCTTATACATAAACTACCTCCCAGGTTCTATCTGGTC	030	FastSeqProp (G)	0.0232329	2.04022	-0.858938
gosai_34256	GTTTGGCGCGAAAAGATAACCCGTTATCTTACGTTCCACACCTGTACAACTTGTATAACTATAGTAACATAGCGGATTGTCTCCCCTCATAAGGCGTCGAGGATCAATAAATGGACAACCCGATTGGCGCGGTGTGAGCCACCTCTTTGACTCCTTATCCGCAGTCAACAGCTGTCATGTGTTGACAGCTGTCAACATGT	030	FastSeqProp (G)	-0.391411	1.94042	-0.915508
gosai_11464	CATAGTCATGCCCACTAAGGCATCTTGGCGTGCAGGTGCTGGATTATGACTCAGGGGGAAATTCCCGAATTCCGGTGATATACTTAGACTCCGTTGGGAAATGGCAACTTTGCTATAGCATCTCATCGTACTCTACTTGTTGATGGATGTACCCGCATTCGCGATGTGCATCGTTGGTGTGCATCACTGATGCCCCATAC	003	Simulated_Annealing (G)	-0.335429	-0.158431	0.00464207
gosai_277	CAGAGTCTCTCCTAGTTAAATATTAACCAAGAGGTGACGCCAGACCTATGCATTCATCAAGCATGGTGTCCAGCAATTGTTTCAGTCTGCACAATGGATCGGAGCCCTCATGGACACAGGTAACAGATGGTCAAGATATCCAATGATTCCTCATAAATAGGCTTAATGGTTGCTGCCCATGCCAAAATCATATTGATACC	003	Simulated_Annealing (G)	-0.276036	-0.198775	-0.817981
gosai_9075	CTCAGCATCCGCAATGTCTCTAGTATTAGAATACGGCACCTGGCTTAAGTATTCTGAGTGAGCATCAGCCCAGGAATCTGGATACCAGTGCCAATTATAGATCCGAGATTGAGTCATAACCTCCCGGATAACAAATCCAGACGATAGCATCCTTGAAGTCGCACCTAGCTGCGCGTGCTTCTGCAGTTGGGATGCTGGAC	003	Simulated_Annealing (G)	-0.2367	-0.363137	0.0175755
gosai_11123	TCAGCTACCAAATTTAACCTCATTCCATTGTAGAAACTGGGGAACTTCCATGGACTATACATAGATCTGTGATTTATTCGTGGAATTCCCTTATCGCGATAGGAGCCGCCAGTTCATCTCGTCACTTGAGCATCCTTTCCAAAATCCATGAACCCATCAGTAGATTGCCGCGCCGTTCGAGGTGCGTTGGTCTCAAGCAT	003	Simulated_Annealing (G)	-0.515426	-0.0584798	0.0271102
gosai_668	CGAACATCCAGCATCTCTTGTCAACAAGCTTCCAGACTAGTTAATTATTAACCTAAACCTACTCTTTCGATCCAAGATTGATCTTTCACAGGATGCATAGCCACCACATCCCATTATAGCCATACATCCACATTGGGATGGGTATGGGATGCAAAAGAGTGGTCGTAGCTCGTAGGGGTTCCCCCGATATACCTGCCTGG	003	Simulated_Annealing (G)	-0.274184	-0.416897	-0.771531
gosai_8192	TCTAAGCACATCCGAATGATTAGCAGTCCTCTGGTGTTAGGTTCCTTGTGCCACCTGGCAATGCCATTTTTAGCTGACTGAGTCATCGATGACTACCAAGATGGCATGTATGGATACATGCCTAGACTGGTCCAGGAGCCTGTCAGTTAAGAAAAATGCCAACGCTGCCCAAGGATAATTATATGAGCCTGATGCAACTG	003	Simulated_Annealing (G)	2.20825	0.0247063	5.23821
gosai_10601	CCTGATTCCCAGATTCCAATGTGACATTCGATAACCGCCGGATGATGCCATCCCATAAGTGTGTCTGAGGATGTCTTGACGCTTCCCGCGCATCAGCATCCTTGCAAGATCGTGATTCAGTGAACCGGAAATGTTATAAGCTGACACCAATCTAATTCCGCGCTCCAGCCTGGCACACACATAAGATGCTATCCATCGAA	003	Simulated_Annealing (G)	0.515981	0.152962	2.60059
gosai_9245	AAAACTTCGCTGCTCTGGCATGCGACGTTGGCATCTTTGTGGGCAAGACCCTGGCATCATGTGAACCGGATGTTATTAGTCCGGGATGTGCTGACGCCAGGCGGAAAATTAATCGACGTCTGCGCGAACGTAATCGAGTGGACGTCGGGAAGAGAAAGTGGTACCCGAACGTCGAAATACCCAAAACCAATTTAATAGGA	003	Simulated_Annealing (G)	0.497019	0.164761	2.64536
gosai_1883	CTCCGTCGAGGTTTTGTTAGCGTTCTTCAGTCCAAAGTCCAGTCACCCACAGTCAAATCACTGCAGTTTCGCCATGCACTTGTGCCCCAATACGACACAGCCATTGGCACCCTAGTGTGTTGCCCCAAAGGTTATCCCGTTACCATATCCGGGCGATGATCAAAGCCCTACCTGAACTTTGATATCGGTTGGTCAGAGTC	003	Simulated_Annealing (G)	0.374747	-0.130751	-0.297977
gosai_9218	TATAAGAGTACGTTATGCACGGACATGTCTGACTGGTGCCAGTTGGCACCAGTGGCATCTCAAGTTATTACGTTCCGGATTCTCTTTGTGTCTTCCCGTTCCGTATGATGCAGAACTCATGCGCCTAACCCTGGTCCACGAGCATCCCTTCGTCGTTCTCATCGACGGCGCGGCAGAAGTACTCTGTCTCGCCTCGACTC	003	Simulated_Annealing (G)	-0.0982381	-0.22609	0.301689
gosai_11994	GGAATATCCAGAAATAGCCAAAGGATGGGCACGGGTCAGTGATTAGTTGTAGGCATTAACGCGAGTAACTATATATATCCGAGTGGTATGGGAAGGTCACGGGAATTCCCCATTTGACCGAAGGATGAGCTGATTCATTGGTGCCAAGCATTTTAGGACTAAGCTTGCCCGCGGTGGGCCGGTTAATCAAACCTGGCATC	003	Simulated_Annealing (G)	0.609626	-0.0377203	1.90529
gosai_8768	TGACGTCGGAGAAACTGGAATGCCAAGGATGCGACTTTCCCCATGATGCCAAGGTTGGAAATGACAACTCAAAAGAGCTCGTTTCTACTGGAATGCAATAATTAGAGCATGTGTTCGGGGGAATTCCCCGCCTGGCATCCAAGAAATCACAGCAACTTTCTCCCAAACCCAATTTTGGAATTCCCCTATGCTGGAAATTA	003	Simulated_Annealing (G)	0.250676	-0.069401	1.43163
gosai_9996	TCAGTACGAGCCCGAGTGAAAGATGGCACGTGATGCAGTTCTTTCACGACGCGCTAGAATTTTCGAAAGGACGAGCAATAATATCCTCCCTGTTAATGGGGTTTTCCATCCTGGCATAATATCTTAAGAATCTGTGTAATAGTGCTATAAATAGCGTGGGAGCCAGGTCTCATAGCATCCCTTGGCTCAATACCGATCCG	003	Simulated_Annealing (G)	0.242929	0.1748	1.64015
gosai_10456	GTATGCCGTCGAGGCATCTCCGGGCACAACTGAGTACCATAGCGAGCAAACGAAAAAGCTGGTATAAGCCCGGGCAGAGATAAAGCCAATTGGTGCCCACACTGTGGCTTCTGACGTTGCTTCGTCTTAAGCATCCGGGATTAAAAATAGAAATCTGTTAGACGGATGATGCGGAGGAATCGAAGACTCCTTCGACACCC	003	Simulated_Annealing (G)	0.100495	-0.00463138	1.51228
gosai_10865	CATCCTTGGTACCCCCTTGCCAGGCATCGCTCGGCTCAAGACGTAACGTAAGACGTTATCGACGTCGCAAGAATTCTTGAATTGTACCCGGATGCCACCCTGGCACATGTTTTTGGTTGGGCGTGGCCGACTGGGAATTCCCATGATATATTCCCCTGGCATGGAAGGGGTAAGTAGACGCGTGCAGTAACCTGGTACTG	003	Simulated_Annealing (G)	0.209925	-0.0361803	1.39675
gosai_10627	TCTGGAATTTCCCGAAGATGCTCCATCCACCCTCTCTGTTGTAGCCACGCCCCGGGATGCCAATGCTGGAAGATATCGGTAGCATCCGGCGGTTTTGCCAGGTGGCAGCAATGATGTCCGGATACACGTATTCGGTGCGCAAGAAATACGTTATCCCGACGGAATTTTCTCCTCGACAAGCCCCATCCTGGTGATGGCCT	003	Simulated_Annealing (G)	0.275768	0.0775022	1.27782
gosai_8290	ATATGCCAGGTAAAGCAGCATCACTGCCTGGCACTACCGACCAATGCCACGGTGTTGCCTTAAGAAACAGTCGATATCACGGAAGTAATATGCCAGGGCAGATTCCGACGTAAATTCTTGATTAATTGGAAAGAAATTTATTCACATGTCAAGACTCGTTGCGAGTTGTGAAACACCCAAGACGATACCCATCGCTTCAC	003	Simulated_Annealing (G)	0.366221	-0.135066	1.19682
gosai_10009	GATGTTCTATTAATACATCCATGAGTCTGAGTCATCGGATGATTAATGGAATGGTAAATGCAGGAAATCTCGGCCACAAGCAAGGCATGGTCAAGCAACTTATATACCACATCCTGATAGGCGTGGACCCTTTAGCATCCTCAAGAACATCTAGAATACCTAGTAGAGCCGCTATCAGACGGCCTTAGCATCCTTCGAGA	003	Simulated_Annealing (G)	0.0717788	0.0161252	1.554
gosai_10660	GCTCTCGCGTGTAGAAGCTGACCCTACGAGCAGAGCATCTTCAGCGTATGCTATTGCTAAGTTTAGCCGCCCATCGAACATCTCAGCCGTCTCCTTGGCATGCCAAGTAATACGTCACTACCGGCGACAATGACAGCCGACTTCCTTACATAACAGGCTGGCATCCTTGACGTCCAATGATGCCCTGGCATTGCCACGGC	003	Simulated_Annealing (G)	0.379016	-0.0145133	1.84449
gosai_11746	GCACTAGCCGCCGACTAGAGCATCTTCCGTGATGGTGGAAACATGCTTTGGCTACAACCATCGGCAACTATTTATAGCTATCCAAACAGAGGCAGGATGAAATAATGCGCAAAGTAATGCCATTGTACTACTCCGTTGGCACCATACTCATAGCATCACAGACGGATGCCAACGCACCGGAAAATGCCAAGAAGTTACAT	003	Simulated_Annealing (G)	-0.248883	-0.3153	0.0867973
gosai_8272	GCAGTGCAGTCGTCTCACATGGACTATAAAACGTCGCGGGCCGTATGACCTACTGCAAGATATCTCAAGTAACGCAAGTTGGGAATTCCCCCGGAGATGGCGACATCGCCAAGAAATGCCCAGCTATGCAATGTCCAAGCTGGCAGCTTAATGCCTTACTGCCAACCCGCCGGCAATAAAGCTTTTACATGACAAGGTAC	003	Simulated_Annealing (G)	0.0604546	-0.0169244	1.31233
gosai_11716	GCGAACAAGGACGAAATCACGCCGTCGAAGTCGATGATTCCAACGTAGAGTTGGAGACTACCAATAGAATTCTTGATCGCCTCATGGGACGTACGCATCTCTACGCAAGAATTCAGTTACTCACTACGGAATCCAAAATTAATCACAGTCCAGGAACGTGATAAGAGATTTCCTATTAGACGTGAATCAAAGCTATGGTC	003	Simulated_Annealing (G)	0.322064	0.209972	1.72063
gosai_10800	TATAGTTACGTCTGTAGCTAAAAATAGAAGACTCGACTTAACTTGGCAACGCGGATGAAACCCGACGGCATTACCAGTTCCCATGGCACCGCCCACTTGGCATCTTTGTCTGGCCAGAGGATGTAGATCAATGATGGATAAGTGCTTAAATCTGCAGATGACTGATTTACTCAGGATGCCAAACATCAGTAGACGACTGG	003	Simulated_Annealing (G)	0.13256	-0.00547626	1.64611
gosai_8923	GAATCGGCGTCACGGCTAACTGAGGTTCCGCCTCGGAGTCATTGCTATTAATGGTGCCCAGTCTGAGTCAGCCTGGCACAATCAAGAGTGCCAGTTGCCCCACCCACTTCGAGGATACGTGAAGACGTATAAATCGAGTCTAAGCATCCAAAGTGCATATCTTAAGGCAACGAAGTTGAATGCAGAAGAGGATGCGCGTA	003	Simulated_Annealing (G)	0.0129578	-0.0357392	1.45086
gosai_9622	TCGAAGATCCTGCGCATCCTATATGACGGTTGCACCCTCGTGTATGCGTCGTACTTCGGATGCTCTGTCGTTGGGCACAACCCAACATCCTGCTATTTTTAGCTACGTCAAGCTCCTGCAGATTTCGTTATTCATCCTTACCCTCTCCATCCGCTATTGCATTTGAAATGCCTCTCAATGGAGATGCTTACATTCTCAAT	003	Simulated_Annealing (G)	0.231453	0.106752	1.2307
gosai_8364	AATGTGGAGTATTTCTATTATTGGAAACATTCCTGCATACTAGTCATGCCATCGAATTTACCCAATTCCATTTCCGCCTGCATATGGTTAAGTACGAAGAAGCATCTTAAACTGGAGGTCCTATGCCTACTCGATGAAGGATGCTTCCGTCAATTCGTTAGGGGACTAGATGGGATGCAAGACTCCGTATGTAAAACGAA	003	Simulated_Annealing (G)	-0.331275	-0.291487	0.195662
gosai_9749	CTATGCATTACTCATGGGTCAGTCATAGACTTGGCATGCCCACTTGAGGGTATCAGCTGGCATCATGCCCCCGGGCATGTGCCAAGCCGAGATAACCGATGATGCATCCCTTACGCCTTAAGATGCGCTTATACGTGCCAGACAAGCTTGCCCGATACCCAATCGGCATCGCATATCCAGGGGGTATCACTGGTACTGGG	003	Simulated_Annealing (G)	-0.506017	-0.476441	-0.0114263
gosai_11823	GGAGTATTCCGTCGAAAGCGAAATCTATTGCGGGTTATCTTCCTGCCAGATCTACCAATCACTGCCAGGCGGAATTGCCTTCCTATCTCAATATGGGTGATTGAGCTAATTCGGGAAATTCCCCATCCCCCAAGACGTATCCTGAAATAGATTCTAGAGTTAGCATCGAACGTCGGAGACGATGGCCAATTCTGGAGCAT	003	Simulated_Annealing (G)	0.590539	0.173947	2.06969
gosai_8611	CAAGACGGTTAAGGCAGCATCATCTCCGGCTATTTATAGGATGCCAACCGACTACGTAATTTCCCAACATTGCGTATCCATCATTGGCATCATAGGAAGTAGCCAAGTATGTCGTAGTGTCCATTGCCGGATACAATCATTGATGCCCGTGATCCAAATCTAGCATGCAATCAGCACATCGAATACATTGCGAGAATTGG	003	Simulated_Annealing (G)	-0.0226553	-0.0675104	1.44615
gosai_10397	CATCTTCTCATTCCATCAGAGAGCATCTCTAGCAAATAGCGCCGGGCTTAATCCCGCTGGAAGGATGTCTCCAGATGCAGTTGGAGGACGTATGTAGGCGTCTCAGATGGAGTGGAAAACTTATTCCCGGAAATAATACCCGAGTCATCATTGGTATGGAATGATGCGATGCCAATTCCAGTTGGCGGGCACACGGTATC	003	Simulated_Annealing (G)	-0.0565447	-0.0280378	1.56107
gosai_11581	ACGGCTGAGTCAGCATCTTCGGGAATTCCCCCGACTGAATCAAGAATTCCACTAATATCTCGATTGATGCAATACCCGCGTCAAGACTAGGGCATGGGAGCGTGCCCTCTACTTGGCTAATTTTAGCTAGTGGCAGCGTATTATACGTATTATACGAGCGACGTCGAATCAATGGATGATGCTCTTGCCAACTATAGAAT	003	Simulated_Annealing (G)	0.0279237	0.071809	1.58417
gosai_8210	GTCAACAGATTGGTATGCCAGGTCCATGTTGTTTCTATAGATAGCAGCCTACGTCCGCCCGAGGGCATCCAAGATGGCACATTCTTAACGCAAACGCATGTCCGTCTTAGAGGGGGATGACAATTTCCGCTGCTCATCGCGCGATGGAGTTGGCAAGGAATCGGTGATGGAATTGAGGAAAGTATCGCGGGCATCGCTTT	003	Simulated_Annealing (G)	0.255264	-0.177659	1.2504
gosai_9501	TAGCATCTCTGCATCTTGAATCTCGAGCATCACTCAGAGGTCAATACCCAATCGCATCCTCGACGTATGCCGCCAACTTGAATGCCAGGCTAATTGCTTGGATGCCGAAACGGAAAGTGAATACTCTAAACCCGACCGGAAAACGATCGATTTGGAATCCCTACTGATGGTAACTCCTTCGTAGCATCACCGATGGGTAC	003	Simulated_Annealing (G)	-0.055249	-0.00593949	1.40939
gosai_9170	TTCATTGAGCGATGCCGTACCATAGCATTCTTCGCTAACTTGGGACTTCCCCCCCCAACCGTGATTCGTGAAGTAATCTGGGAATTCCCACGGTGCTCCTTACGTGAGCGAGCGTGATGCCAAGTCGGCGTGGCAAGTAGCGATGCTCCTTGGGTTTCAATGACATCGAGTATCCGATATACGAATACCGACTTCGAGGA	003	Simulated_Annealing (G)	-0.0198281	0.0522584	1.45983
gosai_8219	TATCTCGGAATTCCCCTAATAGGGCGGAGTCGATACAGATTTACCACTTAATCGAATAAATCCGGTGAAGCATCTCCAAGAAGATGCCACTTCCTCCTACGTCTTGACGCCGGCTGCATCAAGGAAATCTTACGTGTGGAATTAAGCAATGACTAAACATAGATTCTTCCAAACCCTGCGCCAGTTCAAGGTGTTAAGAG	003	Simulated_Annealing (G)	0.174122	0.137326	1.71205
gosai_10072	ACCGACTGGCCGACGGGCTCATGCCGTACGTTAAGACTGAGTAAGGTTTGGAATTTCTGGATTTCTGACATGACTTTCAAATGACTTAGAAGTTTTCTCAAGATGCTTATAGTGCGTACGCGCTTCGTCATGGGCGTAATTTTTCGACCGTCTTCCAGTCGGAATTTCTAAGATGCTCGAGTTGAAATCAGTGCTTCCAT	003	Simulated_Annealing (G)	0.085849	-0.00596305	1.24202
gosai_9240	GGAAATTCCCAGATTCCTAAGTCACAGACGTAACCCGCAACTTAGACAGCTCCTCAAGGAGGCGTATTTTCCGTGACGCCGTCTTAACCTGGCACTGAATCATGACCATTCCGTAGTCATCTCAGCGTCTCATACATGAATCCCCAACCCGAAGCGGTTGCGAGTCGTCTTTGGGATGCCAAGACCAAGCTTAAAGTCAC	003	Simulated_Annealing (G)	0.331558	0.434112	1.50671
gosai_9035	TCCGCATCACTCATAGTCCCTTCGCTACTAGAGACCAGACGTTGATGCCCGCTTCCATTTCCGCCAACCGTGATTGACGTTGGGATTTCCCCCTGACCTGGCATCACTGTTGGTAAGCTGACAGGCACTGCCCTCTCCAGAGTGTTGAATGGGGAAATTCCACTCATCCCTGAGGAACGAACTTTTTGTAGCTTCTTTTC	003	Simulated_Annealing (G)	0.440654	0.0663737	2.04992
gosai_11944	TAACGAGGAAATGATGCTGAGGAATTATTACGTTTATTACATGACATCTGACGCAAGAAATTTGGCCCCTCATCTTAAGGGGAAATTCCGTCGCCGCTTGGAAATGACTGGTATGCTGTCTTCGGCGCGCATCTCGAACCAGTCGTATATAACGAAACCAAGGTTGGCACCGCACGGATGTATCGTGCCAGGTGTGAGGA	003	Simulated_Annealing (G)	0.122431	0.129151	1.69171
gosai_8079	TCCGCCTTTTGCATCAGTGATGCTCGGTGTGATACGCAGGAAAATCCTTGAGGATTTCTAGATGATTAATTCTCGGCTCGATTACGCAATACCGGGGAAATTCCCCGGATATAGCCAGAGCATCCTTTCCAGCATACGTATATCTTGAAAATCAATAATATAGTGCCCGCCAGCCTAACCCTCCGCATTTCATCGACGGC	003	Simulated_Annealing (G)	0.416678	0.16922	1.94883
gosai_9515	GATGCCGGTCGGCGAATTAATGAAAGTGAGGCGCCTTGAGAAAAAATGCGATGGTCAAGGCGGCGTAAGATTTCTTGATGCCAAGGAGGGGCGGGCTGCGGCGTCATCAAGATAGAGCTTCAAAAGAGATTTGGAATCGGAAATCCGCCCCATGCCCGAAAGATGACTTAGTGCTAATTACAGTGCCAGGGGGCATGATG	003	Simulated_Annealing (G)	0.132653	0.0940654	1.75928
gosai_10658	CTACTCGTCCGCGCGCGACGGGACTCCTTCGGCGGGCGTCTTCGACAGCACGGCTCAGACGATTTCGAAGATCCGGGGCAGTTGCTTCTAAGTACGTCATCTAGCCAAGATTATACTATTTAAGGCATCCGGCCTGTAAAGCTTCACATTCTTATGCGTGGAGCATCACCCTCGATTCTTTAAATAACGAGTAGTCACAT	003	Simulated_Annealing (G)	0.23478	0.108586	1.93447
gosai_8368	TCGAGCGATGCCGGCACATCTTAAACAGGGAGGATGGTTTCTTGGATGGCTGCTATTATTAGTAATTTCCGTCAGATGCATCCTAAATTTGGCATCAGTCATAGTAGCCAAATTTAACGGGCATCCTGCCAACGCATGAATAATATATTGGGGGAAGGTCCAGGCATGCAACCCCAACTCACTGGGTATGTAGACTTGGT	003	Simulated_Annealing (G)	0.11637	0.0329699	1.71775
gosai_8141	AATCTCAGTATGGTTGGCATCAACCATACATCAGAAATGGATATAAATACCTAAGTTATGTAAGTACTATATATAGGCTGGCGCCTGGCCCGCCTACGTCTACACAGCATCATTGTACGCATTCAAGCATGCATCCTGCGTGTCAAAGGATGCGGGATCGTGGTAACGGGGTGTGATTTAGACGAGCCCTCCAAGAAATT	003	Simulated_Annealing (G)	0.0606082	-0.140285	1.38583
gosai_10715	TCTTCGCCGGCTAAGCGCGCGTATGCCATCTCGAGTGACAGGATGCCAGTCACCTGGTATTTCCTTCTTTGGCGCTTTACTGACGACAACCGGAAAGTCCCCGACACATCCTTAGGCGTCATATCGTCCTGGCATTTAAGAGTTATTCGGGAATCCAGATGAAAACGCGGGATGGAAGCTTTGCGTCTCACCGTGGTACC	003	Simulated_Annealing (G)	0.905313	0.254265	1.96129
gosai_10444	TTACGTAAGCGTGGGCATCCTACTCTCTGAGACGGCGCAAGACGGCGACGCCAGGTTCCTTGGCACCATCATGGCATCTGAAAATAACACGTCGGAAATGAGTTAGTCAGAGCCTATATGTGGGCTCGACAGATATATCCGACGTACATTACTTCGTCATTAGACGCACATCACTATATATCCGACGAGGTTTATTAAAT	003	Simulated_Annealing (G)	0.14216	0.25103	1.6493
gosai_10645	ACACTCAAGACTCCACGGAAGGCGTGTCTCGGGGGAAGCTCTTCCGCCGAAGTGGACTGGCATCGATTGCGTATGGGACTTAAAATAGCATCGATGCCAGGCATGTGCCCGGGCATATACAATTTCACCTCGCCCAGTAGTTCCTTCGATACCAATTGACGATGCCCGCGGATGATGGATAACACGTGCGTAGAAGATGC	003	Simulated_Annealing (G)	0.0406444	-0.125278	1.38328
gosai_8073	GCTAAAATATCTAAGCATGGACGGGCGCATCGAGGTTTGACGTCTTCGCTGTGCCTTCGTGATCAGAGACTCGACGCAAATACACTACCGAGTTCTAAATATAGATCGAAAATCTGATTCCACTGCGCATTCTTATGGTATATTTAGACTTTCCTATTACTAACGATAATGGGTAATGGCCAAAATGATTTAAAAGATGG	003	Simulated_Annealing (G)	-0.109668	-0.173769	0.604523
gosai_8656	CCGCGCAGGAAGCAATAGTCACACTTCGAAGGAGGTGGTACCCGTTTAAGATGCGCGGTGATATTAACGCGATTTCTATTAGGCGGAAAATCTTGATGGCATCACTTCGGGTATTCTGGTAGGCGGATGTTGACGGTGCCAACGCCCTGCCATCTGCCCAACTAGTGCCTTCGTCACAGAATAATATCTTACCGACCCAT	003	Simulated_Annealing (G)	-0.0990568	0.0122368	1.4144
gosai_11791	GCTCATTCCTCCTCGACGTTCGAACTCCTATGCAGAAGCTTGAGGAATGCTATATGAGCCTCTAATTCAGTTACTCGAACGTTATGCGTCATTATGGGATGGATGCTTGAGGTAGGTTAACATAGCCGGAAATCCGCTCAAGTGGCTAAAATTAGATCGTTGAACATCAATGGTCCATCTAACCTCGAACTATGTATAAT	003	Simulated_Annealing (G)	0.157877	0.169365	1.2697
gosai_10155	GTACCCATCTGTGGCATCTTGTCTTAAATAGAGCTGACGCAAGTGTTCAAAAATGTCCATATTCTGGAGTTGGACGTAATTTCCCAGACTCATCCCGATGATATGCCCACCTAATTTTAGAAGACGACGTAAGATGCGTGGGCATTGCCGACGCGGAAAGAACACGCACAATCTGGAGCTCGATGCCTGACCCTCGAAGG	003	Simulated_Annealing (G)	0.372908	-0.00200448	1.98696
gosai_9415	ATGCATCTTCTGCATCCTTTTCGCCGCGCCGCCTCACGTCGGAGAGCATCGCTGCTCTATGGGACGACCTAAGGGCAATTGAAGGCCTCGCATCGACGTCTCTCAAGTACGTACGTAATTCGTTAGGGTCATGACCACTGAGCTAAATATCTCGAGTCGGCGTGAACCTGGCATTTCGGGCAACTATGCCCTGGGCATGC	003	Simulated_Annealing (G)	0.29779	0.0293987	0.885164
gosai_10048	TACGCACTACATTCTTTGCAGAAATCCGCGCATTTATGAGTAATGCCAGTGGGCAGAATCGATTTTTCTTTATATAGATCGTCAGGAAATACTTACTCCGCCCTGGTATGTGCACGGTTTCAGGCGGGCGCAGTCTTGAGAATCTTAAGTCATGGAACGAAGTCCTCAGTTAGGTGCCACGTGGTTAGATGTTCGACGGG	003	Simulated_Annealing (G)	0.409722	0.547663	1.53058
gosai_8284	TCCTCTCCCCATCTTCTGAGTAACGTCTAATGGTATGGAAATGTGGACCAGTGACTCACATCCCTAGTGCGTTCGTGGGAATTCGCTGAAGGAGTTGGATGCCACTTCTTGCGATGCTGGGAGCAAGCATGATACTGGGTAAGGAAGTGATGGCGAGGCTGAAGGAAATAAGGCAACCGGAGGATGCCAGGCTCATATAG	003	Simulated_Annealing (G)	-0.0484658	0.0166909	1.55896
gosai_8654	TACTGGGACCAAACTGGCACGCCTGGCATATGCCACGAGGAGTTCCCTTCAACTTGGTTGGCACAACGTCATGAGCATGGCGGGTATGTCCCATTAACACATCGAAGGAGACTCAGCCTATTTAAGGCTACGTCGTTGGGGCGTCGCTGGAAATTCCCGTTAACCCGATAGCATCTTCTAAATGGGTGGATGTGAAATCT	003	Simulated_Annealing (G)	0.124047	0.329375	1.45231
gosai_9814	TAAGCATCGGTGCCAGGCATGCCAGTTTCGCTTTCGCTGCAGCCTATGAGATTATTACTAGAGTTGCGCATTGTGATGTTGGGATGTACCCTGCACCTCCTGGATGATTACGCAATGCCAGCTTTCGAAGGATGCTCCCGGAAAGGCACTCGGATGTCTCGAGATGCCTTGAGCATCTTCCTACATCCTCCAAGTGATGC	003	Simulated_Annealing (G)	0.277473	0.0254375	1.89531
gosai_8035	ATGCATCGCTGCACTACATCAGAATGGAATGCGTAGTTAGGCGGTTACTGGCGCTAGTTCCGGCGTGGCTCCTCAGAAGTTGGCACTGCCAACTCTGGTGATGTGTCAGTACCGCGCATCCTCAGTCTTGAGATAGCGGTTACGCCCATCGCAATTCTCATCCCGATTACCGAACGGGCGTACCCGTCGGTAGTCTGCAT	003	Simulated_Annealing (G)	-0.0884894	0.0772073	1.52253
gosai_9226	TCAGTGGGCATAAGTTATAAATGGTACCAGGTTACATGGGATGTGCAATGAACAGTAATCGAGAGCGTGTATAACGTAACTCTGATAGATGCGTCATTGATCTGAAATGCGTATGCCTTTTAATAGCATTACTCATTTTTTGAATGGTGCATATTACGTTGTCCAGTGTCGTCTTCGCATCCTTAAGGACCGTGGATAAA	003	Simulated_Annealing (G)	0.0431744	0.168149	1.65402
gosai_9518	CATCTTGGCATTTCTTAGATACGATTTTGCCTGGTAACTACTTAGGCAGTGGATGCGTCATCCATACGTTATGCTTAAGAAATGTCCTTGGCATCTTGGGATGTGCCAATGTTGGGGGGGATCAAAAACCGGGTGCAAGCTGCACGCCTACATCGTATGATGCAATTTGGAGGGTTCTCGCCTGGCATCCCAGAAGGGCA	003	Simulated_Annealing (G)	-0.219182	-0.292804	0.632584
gosai_9801	CTTTTGGACGCGGGTAGCACACAGCCTTCCTGGCATCACCAGTTGGCACGTGACTTAGGCGCGTTACGATGGCATCCTTGATGCGAGATTCCAGAATCCTTATAATGCCAACAAAGATTTCCTCGCGATGACTAATCCCGTAAGTAGGTAATCCGCATCTGTAAGTCTATAATTCGAACTTTTGAACCTGGTCCTGGCGC	003	Simulated_Annealing (G)	-0.128796	-0.188312	0.981001
gosai_11520	CTACCGTCGACGATCTACGTCTTAGCGTATGATGCCAGGTGTCTACCCAGACTTTCCTGATTAAGAGGGGAATTCCAGCGGACCTGGTGCTATTTATGGCCCAGAGTGCCCGGATATGATGTCTAGGGGAAATTCCCACTTTCTTGTCACCGTGTGCCAGTGATGCCCTTCGAATATATGGTACCTGGCTTAGAGGAGAC	003	Simulated_Annealing (G)	0.63185	0.0135535	2.26511
gosai_9314	TAGCATCAAGATGCGCATCCTTCTCGGAAAGAATATACTTGGATTCATCAGACATCTAATACTTTTCCGTCGCGGCACATGACGCCAGTAAGGAATGAATCTGGAAGGCGCTTGTGGACGCGTGATTCTCCAGTTACAATCTGGTGAGGGATGGACCGGATATTTCCAATATCCTTAGCATCCGCAGCGAGCATCTTATG	003	Simulated_Annealing (G)	-0.0258988	0.142865	1.61463
gosai_10932	CCGTATCCCAGCACGGTAGATACAGCATCACAGATTGATGCTCTGGATCGGCCGGGACTAAAGATAGCCGACGAATGATACATGACTTCCTGGACATATTTTTGGAATATGAATAAGGTTCCTAAGAATCTGATGCAGCATCCTTCACTCGGATTCCGTTGGATGCATAGGAAGATGGCATAGACGTAGGACGGGCGGCA	003	Simulated_Annealing (G)	-0.394666	-0.289233	0.508161
gosai_9361	CAAGGTATGCTCAGAATTTAGACTGGCCCGCATTCCTTCATACCTGGCACCACTCGGGCGTAGCCAGCACAACGTGAGCTAATTATAGGAAATTTGGCTTCCCAACTTACGTATTGGGGAAATTCCCGGGTATTTCCATGCATTTATCAAGGAGAATAGTATGTGAGATGCATCGCTCGATAGACGGGCAAGGAGGCTGA	003	Simulated_Annealing (G)	-0.196033	-0.360537	0.705917
gosai_9052	TCGGTTTCATTGCCTCTATCGATGTAATCCAGATTGGAATTTTAGGAACATCCCCCTCCGGTCCGGATAAAATGCGCAGATTAGCTAACGGGGAAATTCCTTAGGCGCCTGGCAAGACGTTTCTTCTTTGTTACTTGCATGTTCTCCTTGCCCAGCATCAGAGAGCCCTTCAGCATCACTGATTGATCAAGATAGCCGGA	003	Simulated_Annealing (G)	0.135454	0.135481	1.13435
gosai_8809	CCTGGCATACCAGGTATGCCAGTGTCAAGCCCACGGGCAGCGTACCCTCCGCGGCTTATAACAGCAAATTATTCGTGCTTCCGTGGGGAATTCCCAGATGTGGCAACTGACTCGCTATTTTTAGATCCGGTCCCTTAATAACCTAGGATAGGATGCGCATCTCAGATTGTATATGGAAGAAGCATCTGACATGTTGGCAT	003	Simulated_Annealing (G)	-0.027892	-0.249373	1.25026
gosai_10216	CCAGCCGGCTTCGACGGGTCCCGACAGAGACGTGGAGTGTTGGGAGGCGACAGACCACTGACGCATCTTAAGAAGATAGACAGGAATTGACGGAAATGGGGGCAGGTTAAGTTCACATTCGTATTCACAACCGGAATTGGAAAATTCCTAATTAATTTGGCATTCCAGACTAATGTAACAAGAATCATTTCAAGAACTGG	003	Simulated_Annealing (G)	0.307354	0.0447467	1.97667
gosai_10483	AAGATGAGTAACGAAAAAGTAATGTGAACATACGCTGCCATGAGTAGTCGCATGCTATTTCTATTCGTCCGCCTGGAAGGCATCCTGATGGGAAGATGCCAGGCCACTAAAGTATCCCGCCCACAAGTGTCTCTCCTAACTAACTTGGAATGCCAACCGCTCCTTAAGACTTATTCGCAATGCCAGGAGACACGGTGAGT	003	Simulated_Annealing (G)	-0.0147568	-0.343665	1.1166
gosai_11136	TCAGAGCATCCTAAGCATCCGTTATTCTATTTTTAGACACCTGGAATCTATGTTCTAAATGATCAGCGATGAGCATCATCTAAGTAGTCAGCTGGCATGCCTTGAGAATTTCCGGTTAGCTGTATGGCACAAGTGGGCACGTCGGAACTTACATATCCAACGAACCAGCTGCCTTCGTCGAACGGGGCATCGCAGCCTGG	003	Simulated_Annealing (G)	-0.021532	-0.336966	1.165
gosai_9979	TATGACGGAAATTCCTTGAAGAATGCCAGTTCTGGCGTATACGGATGTCTGACATACGATGGATGCATCTGATGTATCATTTGCTGGGGCGCCAGACTGCATGCATCACTTCACCCGGGAGGAAGATGCCAGACGTTTCAATCATACGTCATTAAACGACGAATTTCGTTGCCAGTTACCGTCCAAATCTGATGGGTACC	003	Simulated_Annealing (G)	-0.0860631	0.0357583	1.62581
gosai_8927	AGGCAATACGATCATCGGATCCCAATTAAGGATGTAGTGCCAAGTCGCATCTTTCGTGATGTATATTTAGAATTTTTTTGCTACATTCCTCGCCATCAACTAACACTTTACGCAACGTAAGTACGTAATTCCGGTATTATTAACATGGGAACGGTTGGCATCATCATCCCGGGGATGCCCTGAGATGTATCACTGGTACC	003	Simulated_Annealing (G)	-0.150564	-0.323168	0.993691
gosai_9766	ACGCGCCCCTCACTAAGACGGCAGGGTATAATACGCCGCAACTCCGTCTGGAATTTCCCTGTTAACGCATCGCTCGAAGATACTTTGACGGGAGTTTCCAGAATGCCTAACACATGTGAGTAATTAAGAAGTAATTTGGCTACCATCAACCATTTGCAATAGGATGCTAAGGTTTGCTCTAATGGGGATGGGTTACGGTA	003	Simulated_Annealing (G)	-0.0877647	-0.0674967	0.639106
gosai_9210	TATCGGTCTGGAATGCCAGGCGGAGGATGCCTGTCTACCCATCACGCGCTTACGCGATCAGGCGCATGCTAGATGCTACACAGTCGCAATTCCCATTCGATTGGCATCTGCCATACTTAGAGAATGACTAATTGTAATTCCTAATGGGAATCCCCAGCATCTTTTGTGCCATTTTCTCCTAAAGTTACTCTGGTTAGCAT	003	Simulated_Annealing (G)	-0.356889	-0.350885	0.404241
gosai_8201	CTGTTGAGATGATTTCGGATCCCCAACTAGCTTCTTGCACTAGGCGGGACACCTCCAAGAATCTTGAATCACAGCGATTCGAACCTCGCTTTACCCGGATGCTTGTAGCATCGATGCGGCAAATGAGATGCAGGAGTGAGATGGGTGCTAAATAAATCATAGTCGCCGGATTTACGCGTGAGGGATCGCCTCGGACCTGG	003	Simulated_Annealing (G)	-0.401656	-0.305311	0.4032
gosai_10572	GATGGTATGTCTTCAAGTTACACTCAAGAAGATGCGCTCACCCCGCTGGAATGATACCCAGTGGCAATGAACCGGTTATAGTTTGTAATTATATCGGCGATACGTGAATCATAGTCATCTGGGAATTTCCTATGGGGCCTGTAATACGAACACATCCTTGCAGATGTACGCGTAGGGCATCATTTGTAGTGGTTGCATCC	003	Simulated_Annealing (G)	-0.30026	-0.298306	0.805375
gosai_9355	TGATGGCCTACCAATCTGACTGGTACTGCATCCTGGTCCGACTTAGGATGTTATTCCAACGTCTAGGTTTTTTCGTCCCAAGTAATGCTGCGTCATGGATCTAATTCCGGATAAATCATAGTCAAGATGACTCAAAAATCTGAAATGTTAGGTCCTAAGCAGCTTCGATGATGAATGATGCTGCCTGACACCGCTAGCAT	003	Simulated_Annealing (G)	0.0981198	0.314892	1.42757
gosai_8602	AAGATAGGGAAGTTGGCATGATTGGAGAACCACACATTTCCTATTAATGACTCGTCCGTGGAATGTCGGAGAATTCCGCTAACCAAGAAGAATCTGATGTCTCGACGCCTTAGTTTCAACCCTCGTTAACGGAATTCTCTAGGGTAGATTGATGCGCGGAAGGATGCCAACTCACATCTTCGACGGAAATGATGTGAAGA	003	Simulated_Annealing (G)	-0.121676	0.0427825	1.26892
gosai_10993	GAGACTTATCGAAGATGATATCCCAGTCTAAATCACGGACGAGCGAACTTTTGTTTCACTTGCGCAATATCTCGATCCGGCGCATCCTTAAGGCATCACTAGGGCATCCTTTCCTCATTAACCAGCCAATCCAAGACGGTGAATCTCAATGCCTAGAAGTCTAATCTGCTTGAAATCACGCCGATAATCCGTGATTCAAC	003	Simulated_Annealing (G)	0.00242499	-0.163785	1.10486
gosai_8480	AAGTCCATTCCGAATCTTCTGAAGGACGCGTCTAGATGCCCCATCTTATACGCAGACAGATTGGGAAATTCCAAGACTCAATTCATCATCCGGCGCAAAATTTCCGGGCTATAATTTTAGGAAAACGACCGGTTCCTGTGCCAGTGTTGGGCATCTATTACTAATTGGCAAAGCATCTACCTGGATGCCCATGCTAGCAT	003	Simulated_Annealing (G)	-0.0579655	-0.168232	1.3894
gosai_10123	ATCTTCGTGGCTCCGACGGCCCGCGAAGAAGCATCTTACGTTGGCACTCCACGTATTAAGTATATTGATGCCTCTGGCATGCCTGGGCCGTTTAGTCATGCTATTTATAGTCAGTAAGTAACCACGCCGACCTGGGGACTTGCACATGATGCCAGTAAACCGTGGCCAGGTGCGCATCACAGCTCCAATGGTACCAACAT	003	Simulated_Annealing (G)	-0.0606005	-0.375155	0.915642
gosai_10534	CCTGGCATTATGCCAGTTACCCTCGCCAATGGCTACCATCGAGACGTATTAGTCACTGGCAAAATGCCAAGTTATGCTCGGGCATGTACGGTTTCTTAAAAGATGCTGCATCCTTTAAGTAGAATGCATGTCTCCCATTGCCTACATTGAGTTGTGATGCTGTATCGAATCTTATTCGACAATGCTGCTCCGGAGGATGC	003	Simulated_Annealing (G)	-0.135669	-0.0764293	0.763717
gosai_9796	TAGTTGGTAGATGCCAGACTGGTATGTGGTAAGTGCGTTGGCATCTTGCTGGCCATGACTCACTACTTGGAAAGCCTCTGATGCCCATCCGGGTTGCTATTACGATTTTCCGTTATCAATGCAATAACAGTATGAGTCGGTTTACGCGACTTAAGAGGGTGGCATCCGCGTCAAATCCGATATTCGGCTAATCAAATTGG	003	Simulated_Annealing (G)	-0.0140066	0.0489644	1.70057
gosai_11082	TTTTAGATAAAGCGCTAGATTTAGACGGTGCCCATTACTAACCACTTAAGAATCTGGTCTATACGTAGTATGGTTGGCATCGGACTCCCACGACTCGGAAGTAATCTCAAGGGCAATTAAATGCGTACCTGGCACCAATTGACGTCCGTTCTACAAGGAAGTTGTCAGCTTCTTCGAGAACTCCTTCGTTGAGATATTAA	003	Simulated_Annealing (G)	0.0345411	0.228266	1.14917
gosai_8383	GTCCGTCTTCTAGTTAGTTCTTTCTACGAATTTGCACGACACCATCAGCATCATGCACAGCAGTGATTAATTTTCGAAATACCATGCGTGAGTCACTCATCGCATCTTACGTCTTTGGAATGCATTTCAATATAATGGCATTACTTTTGGATGGTTACTGCAGTCTTCATCAAAGTCGCTACCGTGATGAGGGTTGACAC	003	Simulated_Annealing (G)	-0.224402	-0.152189	0.763
gosai_11415	TCAGCAGTACCAGCATCACTCCGTAACCGCAGACAAGCGAACTCGGTGCCACTCCATCATCAGTCATCGTACCAACATTTGGTTTGGCATTTCCGCTGAACCTGAGAAGACGTCTTCAGCTTACGCAATCGGGAGAAGACGGGAAATGTGATTATCCCGACGATTAACCGATATGCCCGACGCATCCCGTCGTGTTTGCA	003	Simulated_Annealing (G)	0.048825	0.238305	1.71274
gosai_10682	AGTCACTGTAAGAGCATCATCCTCGTAATGCGGCATCTTGATACCCCGGATGGAAGAGTGAAGTCAGTGCCCGCGAGTGCCGATTGGGTACCGCATCCTTGGATGCCAACCGTAATCCTGCCCATTAGTAGTAGTTTCGCTATCTCGGGGACGAGCAGGTCGTACCGCGATGGAGTGAGGTTGGCCAAGACCGGGAGCAT	003	Simulated_Annealing (G)	-0.159119	-0.262335	0.962995
gosai_8313	TGAGAAACGGAATAGTGTGGAAGAAGCAGTCCATTCGCTGAGACGGGCTGGTCCGCCGCAGATGCCCGAGATGCCAGGCCCCTATAGGATGCCACGCATCAGTACGTCACGTCTTCGTAGGACTGGCTGAGATTTTTGACCTTGACGTCTTGACCTCGACGTAAGTCTCTAAGATGTATTTAAGCATCCAAGGGATGCTG	003	Simulated_Annealing (G)	-0.196541	-0.316096	1.02255
gosai_11526	TGGTATCCAGATGCGCATATGGAGCATCAGCCTGGCATACTTTACGAATTTACGCATTTCGGGGAAATGCCCCAGGCAACGTACCAAAGTTGATGAACGTAATGATTCACATACTTTGCTGGTGAATTGCCAATAAACTTGTTCGCGCGCATCGTAGGACAGAGGTTGAGAAATGGCATGCCAACGTCTTGATGTGATTG	003	Simulated_Annealing (G)	0.0928515	-0.334237	1.55067
gosai_11232	TCCTTAAGACGTCGGTCAAGATGATTCATCGGTGAATTCCTGATTTAATGATGTCAGGACGCTTATAGCACTATGGGCAACTCGGACGCAATCGTCTATTAGGATGTAATCGTCCGCATCACTTCGAAGGAACCCTCCCCCCCCAAGGATGCTTACGTGCAGAGCATCTTGGGGGGTTGCATCCGAGTGGGGCAACGGAC	003	Simulated_Annealing (G)	-0.0484509	0.262839	1.4604
gosai_8302	GATGCTGCCGGGCGTCCCGCATCCCCCTTGCCGAACATCCTTCGAATGCCGCGTATCAAAAGGCATGAAGATATTACTCAGTACTTGAGGTACGGAAATGGGTCCAAAATTAGTCATTCCCCGTAAATTGGAGTCATCCATGCCAGGATGATATCTATATATATTCGAGAAGTAATGCTTGTATTCTCGCTCTTAAATCT	003	Simulated_Annealing (G)	-0.398074	-0.125	0.485591
gosai_8552	TGCGAACCCGGCGGATTTCCCGCGCATCAAATAACCGGACCGACGAAGAAGAAATGCCCAAGGGGAGTGACGAAGTATCGATTTCCACAACCCCGTATATGAAAAGAACATGCTTCCCAAAATTCCTGGCACATTTCGTAATTAACGCAAAACTGCAGTGAGTGATTCATTTTGTCTGGGATGCCCCTCAATCGAGAGAC	003	Simulated_Annealing (G)	-0.0818168	0.0299714	0.755014
gosai_8333	CAACTGGCATGCATTAACGTAGAGTCGCACGACGAGCAATGCCAAGTAAAATACCGGGCATGTGTCATCTAGACCAGAACGAGTCCGCACCTGGCACATCCTTCATCGGCCAACCGCCGGAAGATGCGCAAGACGTACTTCGCCCCGCAATACATCGTGACTGACTCTCCACGATGCCAAGAAGTAGTTGCCTCTTTCTT	003	Simulated_Annealing (G)	-0.0428824	-0.188723	1.49986
gosai_10262	AATTCCAAGATACTGAGTCATTACCAACTGGGCATCATCAGATCTATGCCAGGTCAAAGCCACGCCCACTATGCCAACTTGCATGCCAGGGCTTGGCTCCTTTAGGCAGCAAATACCTTTCACCCCAACAAATCACTCCATTGCCTACCAAGTTACAGCGTCAAGGGCGGGATGGAATGTGCCAGGTTGCGGCGGATGGG	003	Simulated_Annealing (G)	0.272893	-0.510203	1.41202
gosai_10851	TCTTCGCAAGGCAATCCCATATAGGCGTGCATCCGTTCAAGATACCCACCTCCCTGGCATCATCCGGCGCAGTATCCATGCCCATCTTCGAGCAGTGGCGCGATAAGCACGAAATTGTGGTCCCGTATCCTAACACCATGGGCTGGCTCACTCCGCTGGCATTCTATATATAGCATCCCTCACAGGGTTAGTCTCTGATG	003	Simulated_Annealing (G)	-0.312943	-0.309537	0.833811
gosai_9771	TCTGAGATTGCGTTCAGAATTGAGATTTCATGTATCGCAGCTGGAATCTGACGCATACTCGACGAATGCGTTAACATCCGATGGAGAAATTTCTCGGCCCGGTTATACAGGATGCTGACACGCTCGGTAACGTCTCGGAGTCAAGACACTATCCGTTAGTCGTAAGAGGATGGTGATAGCATCTTAAAGGGCATCCCCAT	003	Simulated_Annealing (G)	-0.16542	0.197744	1.28407
gosai_11682	TACGCATCTTATCAATCGGGAATTCCCAATTTTCCAAGGAAATACATCATATGACCAATTGGCATCCTTTCTTGAAGCAGCCAGGCGGAATGATTCATTTCTCGACCAATGATTCTTCACCGCTATAGCATTTTGGCATCTAGTGCGCACTAGCATCCTGGCACCTAATAAGATGGTCCGTAAGAGATGCTGAGACTACA	003	Simulated_Annealing (G)	-0.171113	-0.0308811	1.45595
gosai_8111	TGTCTCAAGGATGCTACGACTCCTTAAGTCGGAAGCTGGCTAAACTTGGAAAGTCCCTGGCTTCCGGACACCCCTTTTTGTGGAATTCCAAGAAAGGATGCCCATGCGTTCCATGCCATTGCGTAGGACACAAAGAAGAGATGCTCGCCTGGCATACTGTCTACGCCAGCATGGGCTATTAATTCTCTGCCCGGAGGATG	003	Simulated_Annealing (G)	-0.286823	-0.297514	0.9069
gosai_11750	TCTCACTCTTGGCAGCACAGGAAATCTTAAGGAGTTAGTCACATTCCTTAAGCATTCGACTAATCGACCCATGATGGCATCTTAAGATTGAGTATGATTGCGTGAGCGTAGGGTTACACAAATCAAGGTCATATTGGGTTATCAGTTATCGGTGCCAAGCAGACCGGTCACCGTTGCCTATGGAACATCCTTGGTACCAC	003	Simulated_Annealing (G)	-0.305445	-0.0805835	0.421805
gosai_10266	GGCTAGCCGAAAACCACTCCATCCGTCTCGCAATAGAGATGAACTTCCGTACGTCTTCTTTTACGCCAGCCTGGCATCGGAAATGGCATCCAACTTTAAGGGCGGATCCCCAATAAGCCACGGGATGCGTATCAATCGGACAAAGAATCAGCTCCATCCAGCATCGCCGACAGCAACTTACTGAAGGGATGCTTGAGCAT	003	Simulated_Annealing (G)	0.209928	0.0711931	1.93365
gosai_9036	GATGGTTCGAAAACTCGTGAGTCAGGACACGGTTGGCACTAGTTCGGGGAAATACCACTTAACCCGAAATCGATATGCCTATGACGACTAACCCCTGGCATGATTAATAGCCTGGAAAGCTGGGAATTTCCCATCGGTCTATCTGCGTGATGCTGCATCCCCATGGGCGCTAGTATCCTTGCCGAGAACCAAGTATCGTA	003	Simulated_Annealing (G)	-0.0542594	-0.0525829	1.2221
gosai_14139	CCTGGCACCATTGTTGGACCGCTCTTGGACTTTGCCCCATCCCCCAATGCCAATATTGATGACATCGAGGACATTGAACCCTTTGTTCCATCCAGAGGGATGTGTCTATAGGCCCAAACGATGTGAACCTTGAACAGCATCCTTTGTCAAATACCTGTTGTGGTCCAGCATCATTACAGGTGAGCATCCTGGGCAAACAC	003	AdaLead (G)	-0.47327	-0.240789	-0.543729
gosai_21583	GACCACAAGATCACGAGACCTTAAGATGCCTCCGCTAGCATCCTTGTCGCAAGTACCACTCCCATGCGTGCGGGCGAAGGCAGCATCCACAGAGGGCACTAGCTTGGCATCGAATGGCATCATGGTTAACGACGTATCATACGTTGCGTACGACGTATGCCATCGCCTGGCACCAATGCTATTAATGGTAGCATCCCTGG	003	AdaLead (G)	-0.428713	-0.399977	-0.324186
gosai_15004	GATGGTTAACCATTAACCAGGCACCCTGGACTTTGTACCAGGGCAGTTGGCATCACCGGGTACATGCCCAATTGGCACTAGGGCATCCTTTGCCCATTCAAGTTGGCATATAGTCAACGTGGGTCCCCCCAAAGTCTACCTGTCAGGTTAATCATTAACCCCATCCTAGACCAGCCTAAGGTTGGCACATTCTGGGTTGG	003	AdaLead (G)	-0.350811	-0.315564	-0.649807
gosai_22739	CATCACCAATGCCTAGTGAGTAGGATGGCATGGAAATTCTCAATTCCTGTGGAATGTACCTGGCATGCATCCTGGTGGCATGAGTTATTAATAGCCTGGCATCTGATTGAGTTCCGGTTATGCCTTAATTGGCATTGCATTGTGTGCCAACCTGGCACAGTGGTTGGCAATGATGCCAGGTTGTAATTAGATGATGCCAA	003	AdaLead (G)	-0.41057	-0.375668	-0.107206
gosai_13245	CCAGGCGTCGAGGGCATCAGTGCCAGGGCTTACACGGCTAGACGGTCCGTAGGTCGGTTAATGAGTGCCAATATTTGCTCTATGCCATTGATCTGGACCAGGTCATCCGGTCATTTACCTGAGTGATGTCCCTAGTCCAGATCAATGATTGCTTTGATCAGGTGCCGGTGAATCAGGCACTGATTGACTAGGCAGGTGTG	003	AdaLead (G)	-0.339954	-0.272364	-0.864649
gosai_22313	GCTGAGATTGCGCATCCTGGTACCCATCCCCTGGGTACGTCCGAAGACACGCGATGACCTGTCTCGGAGGAATGCCAGGCATGCGGTTTATTAATAATGCCCTTATGAGTCATAAGATTCCGTCTAATGAAGGAAGAAATCTGTGTCTTGACCTCTGGAATGTGATTCAGTGGTGTGAGGATGCCAGGTTCAGGTAGCAT	003	AdaLead (G)	2.27288	0.0645321	5.27413
gosai_21570	GATGCGCATCCTTCTCTTGACCTCACGCGACCTCGAAGGATGTATATTGGAAATTCCCGATTTCGTGAGCATGGATTGCGGATGCTTATCACGTGCATCCTTGGCATCGAATCGAGTACCACTATACGTCACTCTCCTTAGGGCCAATCCCTGGCACTTGAGAATAACACCCGAGGCTGGCAGGAATGATGGGTACCAAA	003	AdaLead (G)	0.4824	0.135842	2.71504
gosai_23058	GACCAAGGATGCTGGACGAATAATGGATATTCCTTGTGAGACGTGACTCATCCGATGATGCTAAAGTTAGACGCACATTGGCATGCAGCATCAGTACCCGCCTGGGCACAATGACGCAAATGATGAAGGGCGGATCCGCATCCAAATCTGTGCGGAAGTCCTGGCATGGTGCCAACTCGGAGAGGATGCTCTTCTCCCTG	003	AdaLead (G)	0.527988	0.0521834	2.62062
gosai_12542	GTTGCACTTTGGACCATGATGGACTTTGAACGTGAACACATACGAGGGGTACCCTGTTGTGAGCATCACTGACCTTGGTCCCCGGTCATGGTGCCAATCAATCAAAGTCCAAAGTCCATATCAATCATACCCAGTTGTCTATTGATGTAACCAGTGCCCTGGCACAATGAGTGGGGTACCCAGATTGAGTTAATCATTAA	003	AdaLead (G)	-0.00213237	0.0886116	-0.382031
gosai_20405	ACCCGTCGATGGAGAAGGATGCATCCCATTAGTGACGGAAACTCCCTCGACGGACATGTCTTAGGCATGTTCGACGCCTTGGCATACGCCTAAGACATCCGGGTATATCTATCCAATGGATGCATCCTATGAATTCTGGTACTGGGTACTCTTAAGTATGATGGCAATGCATCCTGGTACCCGTTGACGCATGGGTACCA	003	AdaLead (G)	-0.51729	-0.214699	0.00206118
gosai_22759	CCTGGCATGATGCCAGGCTGCTGTCAAGACTTCCCCGTCGATGATGCTATATATGGAACCGCAAAGAATGAGTCGTCTTCGGCCGAGATTTCCACTATTAATCAGATAATTGCCAATTAGCTGGCATTTCCGCCTACCATTCGATGCCCGTGATTACGTATGCCAGGATGCCAGGCACGCCCGGGTGTCAGGATGCCTGG	003	AdaLead (G)	0.211589	0.220495	1.65588
gosai_21261	TCGACTACTGGAGCATCCTTGATGCCAACTGCGCGCCAATTGCAAGTTGGCACAGGATGCTACGTTACCAGCGTGCCAACGTAGACGTCTTATGATTCATTACTCAAATATGTTTCCGATTAATACGTGATTTATTAGTCATGCCTGGCAGATGGGCACAGTGCCCTGGCATTTGGCATCACTCCTTTTCTCAGGTAAAT	003	AdaLead (G)	0.227743	-0.287843	1.49783
gosai_22029	TGATTTATGCCAGGGAGGTTGGCACGTGACTTCGCTGGAAGACGTCTAAGACGCATACGTCAGCTGCAAGTGAATCACGTCTTAAGATGTGCTGTCTGACGAAAGGAACCGTGTGAGTCGCTCGCCTGGCATGTAGTTACCAGCTTGCCAGGTGCCAGTCTCAATGCCCAGACTGATTGGGCATCGCCCCAACTTGGTAC	003	AdaLead (G)	0.570834	0.088023	2.22141
gosai_12989	TGGGCACTGAACTTTGGCATGCACCTGAACTTTGGACCCGACACAACATACTACATGTCTGTCTGTGCCAATGTCATTGGCATCATATCCTGTCATGTCAGAACAAAGCACCTATTGTGCCAAATGACCCTATGTGCCCAGGCTTCCGGGGCTTGCACGCATCGCCAACAACAGGTAATGCCAAGGATGCATCCACCTGT	003	AdaLead (G)	0.697746	-0.371544	1.19327
gosai_23079	TCGTCGATGCATCTTATCCGACGTCGGAAATCCCTTATCTCATCTCATCGAATCAGTACTCAGATTGATGCTCTTCCGGGCATGAATAATCGGATTCGATTCGCGCTTCTTGCATCTTAAGATTTCCAGATGCTTTTCCATTGTTCGGTCTGCAACGATGGAAGGATGCGCTTATTCATACTCCATCGACGGCTTGGCAT	003	AdaLead (G)	-0.0148497	-0.0771844	1.41112
gosai_23521	TCGAAGCATTCGTATTTCCTCTGGGCATCACCTGGCAAAACCTGGCATCGAATGACGTCAGATGGGCGTGGGTTGGCATGATGCCAAGATGACCTTTGCGTGAAACATTCTTGTGGTATGTGCAGAAATCAGTGCTCCACCGAGGATGCTATCGCGAGCATCCCTTGGCATCCATCCCATCGGATGCAGATGCCAGGTAC	003	AdaLead (G)	0.0950398	-0.0808705	1.69217
gosai_23621	ATGCTCAATGGGCACAGACCAGTATCAGTTTGCTCAAGGGATGATGCGGGACGGGCATCCATGCGCTGGAGCTGCATCTTCAAGACAAAGGACAAAGGACCAGAAGATGATGCTACGACATCACTAATGCCACGGCTGGCACTGCGTCACAATAAAGAAAAATTTGGATAGTCGGGAAATTCCCGAATGAGTTTCTTGGG	003	AdaLead (G)	0.00252888	-0.0564689	1.3698
gosai_20294	TCGAAGTTGGATTATCGCAGGTACCAGCATCCCATCGCTAGTGCCATCAGGTAACAAAGGATGGAACCTTTGATGGATGCGTACGCATCTATAGTTGGCACGGAAGATGCGCCAACTTGGAAATCCCCAGTCATTCATAAATGAATCATGCCCAACTACTGACTCATTACCCGCTAGACCTGGCATGGATGGATGCCAAC	003	AdaLead (G)	0.594682	-0.0629525	2.27587
gosai_22713	TCTTGAAGGATGCTCTTCTCATTTCCTTTTGGCATCTCGGGAATTCCCGATCCCGTAAGTATATCGAATCGAATTGGTTGATGCCAATCAAGGAATTGGAAAGGCGGGTCCTCGTAAATCAGTTGCGGATGGCCGAGATTTCGAATCAAACCGGACGACGTCGACAGCTCCATCAAGTGATGAGCATCACTCTGCTACTG	003	AdaLead (G)	0.781541	0.746845	1.72864
gosai_15317	GGTTCAAGGTCCACATTGCATCAATCACTGTCGCTCACTAGTAGCATCAGTACCACTGTTGGAGCATCCCTCATTCACATAGGATGGGTACCTTGATAAGTTCGAAGTCCACTATTCAAGTCCAAAGGTCAGAATGTTTGCTCTTGGTCCAAAGTCCACACCAGGTCCGATGCCCCAATGCCAATATGCCAACATGCCAA	003	AdaLead (G)	0.147787	-0.0341209	-0.412886
gosai_22304	ATGCTACGGTTTGGGCATCACTGCCAATGACTAATACTAGGATGCTGAGTAAGCTGGCAAGATGCCAATGCAGTTAAGTAGCTGCCTGGGCATGTGCCAAGAATTTGCCAATTCCACCCCGCCAATGAGTGACTCAGAATGCCAGGCTTCCCTATCATTGGCATCCCAAGACAATGCCAGGAGGGATGCCCCCTGGCATC	003	AdaLead (G)	0.251515	-0.210519	1.12784
gosai_21389	CGACGAAGGAAAAGCATCACAGATAAGAGGCTGAGATTTACTCCTTAAGATGCTGAGGCGGCGAATACCGGAGTCCTTTGTGCATTGATGCCCGCCCTGGCATCATTGATGCTGCAGAATGTCTTAGAGATGACGTCTTAAGATGCGATGACGCCCGCGTCTTTCCAAGAAGTCAAATTATTCGGGAAATTCCTTAATTG	003	AdaLead (G)	-0.0148159	0.201847	1.6126
gosai_20943	TCGAGGATGCTCGCGGTTATCTACAAATCACGGCTACGCAAACCGTTATGAGTAACCTGGCAATGCCCCAAGAATTGCCTTTGTTCCGTTTAAGTACATGCCAGAGGCGCTTACTCATACATTACTATGCCACTTTGGAGGGATGGCATCCCTTGATATAGGATGCTCGAAGGATGCGCCCTGGTACCACAGGTGCCTGG	003	AdaLead (G)	0.643259	0.0107954	2.43364
gosai_22765	CTCCGATTACCCCGAATGAAATCTGACTCATCCGCAGACAGCTGATTAATAGTCCAGATTTGATTCTTGATGCCAACCCGGACGGATGTGTCTTGATGCCATTTCCGCCTTAGTCGTGCCAATTAGGCGTATTCTCCATCACAGAATGATGAGAGCATCTCCATCCCTCTTAATTTCCCGCCACTTTTCGCTCGATGGAC	003	AdaLead (G)	-0.205426	-0.0413838	1.57381
gosai_20760	GAGATGAGTATTCGACGGGGATGCTGCAAGACTAATCTCAACCGCCGAGATTCATTGGGAAGACGTCAGAAGACGCAAGGATGCTTGAGGAAGTTGCAATACTATCCCCACAATACATTTGGAATGCATCCTTAAGTTACAATCTCAGCCGCAATATCTATATATAGATCGTAAATCATGCAAAAGCGATGCACGAGACC	003	AdaLead (G)	-0.120333	-0.0599594	1.19212
gosai_21794	CGTCGAATCTGTTGAAGGATGGGCACTTGCAGATACCCGGGAATTCCACGGTATCGATGACTCAATTGCAGTGATTTAATGCCCACTTGGCATTCCCAACCACACATCCGTACCATTTATAGCTCAATTACCCCGCCTTGGGAAAATCCAGACCCGGGTAAGATAGCGATGCATCCTGCAAGGATGGATCAGGTGAGCAT	003	AdaLead (G)	-0.32866	-0.443059	0.0352603
gosai_21861	TCTCCTCAAGATATGATGCGAAAAATCTGTGCATGCCAATCGGGCTAAATATAGGTCTGACGCTCATGGCAAGGAATCTGGCATTGGCACATAATTGGGTAATGATGCCAATGTGCCAGGGCGCTACGTAATAGATGGCAATAGCACGAGCGCTCTAGAATTCTATGATGCCCATGGCACGTGCCAGGCGAAAGAAGGCA	003	AdaLead (G)	-0.406443	-0.471643	-0.0591015
gosai_21914	GACCGTCGCGGATTTGCGGAGAGCATCACTCGGGAGATGCTCAGGATGCTGAACCGACGTGATACCCGTCGGTTACGCACCAATTACGTATCCCTTGATGCGTCGGCATCACGCATCCTCAAGCATCCTTGCGCACCAATTTGATTGATGGGCGGGGCAATGGTACCATTGATGCATCCCGTGATTCGAGGTGTGAAAAT	003	AdaLead (G)	-0.00744566	0.187146	1.67872
gosai_21182	CCAAGCATCCTGGAATTTCCCGCGAAGTCAGCATCCTTGCCCAATGGAACGGATAAGATGCCAATCCACAGTCGGCGTGTGGATTCCGCTCCAGCAGGAAATACTTAAAATAGCAATTAACATCACTCCTTCCGCTCAGTTGGCATCTCATAGACGCAAATCCAGTATTAAATCACGCCTTGGCATCCATCCCTCATACC	003	AdaLead (G)	-0.0644238	-0.258352	1.52033
gosai_23914	TCGAAGAAAATCCAATGACAGCCAATACCATTCGACGCCTCCTTTGTGCATCCTTAAGGATGTACTAAGCGAACGGAGATGCGTAGATTCGACGGCATCCAATAAATCTGGACCAGCAACGGATGTTATCCCGGAAATTCCTGAATCACTACATCCATCGGATTCGACGTAGGCAATTGACCTGGCATCCTTGGACCTGG	003	AdaLead (G)	-0.207167	-0.0281934	1.5918
gosai_22630	ATGGAGATAGATACAAGGGTAATGAAGAAGAAGGATGATGCTGGGCATTGCACGTGCCGGGCGGAGTAGCATCCTTACGTCCAACCATCGCTCCTTTGCGTAATAAAGGGCGGCATCTCCGACGCCGTCAAGACGTTACGTAGGCAATCTTGATGTGCCAATCCGATTAATCTCAAGTGGATGCCGAGATTTAGGATGCC	003	AdaLead (G)	-0.0801827	0.0229765	1.76163
gosai_23451	ACTCGAGATTTCCCGACGGATGCGCATCACTATGGGCATCCTCCAATCTATCGACGAGATTGATGCCATCCAAATAGATGCCACGTATATATGACGTCCAACGTCGGATGCCGCAAGAATTCTTAAGTGCTCTGCGAATACGTTAACGTTGGCACTTCCTGCCAAGCCAGTGCCAAGTTAATCTAAGAAATGCAACCTGG	003	AdaLead (G)	0.00640996	-0.0861194	1.04806
gosai_20163	CCAACCATAGCATCCTGGCACTACCGTTAGCGATGCCAGGCACTTCCGTCGATGACGTCTTGACGTAATGCCCAGGCGATGCAAGGAGGTTGGCATCCTTGGCACTGGCATCATCACAACTTATCGATTGGCAGAAGATGCGATGACGTACTCGATGATGCTAGAGATTCCGATTGATAGGGGATAATAGAATGATGGAC	003	AdaLead (G)	-0.271179	0.0241568	1.44936
gosai_20652	ACGGCATCGATGCTGGAATGTGCTATCCGACGATACGTTATCGACGGGACTGCATCGATTGGAGCAAACATCCTTAAGGATTGCATCAAGGATTGATTAGTAATCGGAATGGAATTTAATTATAGCATCTTCCTCTTGAGTCGTGATGCATCCGGGTACCCAGTCACCTGGCACTGTGCCAGGCATCCAAGAGGGTGGGT	003	AdaLead (G)	0.540895	0.30538	2.12633
gosai_22877	ACGGCAATCTGGGCCGAAAGAGATGATGCTGAGATTTGGATGCGCATCCTTTCGCTAGACAAAGGATGGAGAAGTCGGCGGGGCGGATTTCCGCGGGATGTTCGAATCCCAGCATCAATCACGTCCGCTCTAAGTTGCCGTCTTAAGATACTCCAAGAAGCCAATCCAAGATTTATTCGACGGGGCATGTCCGGATAAGA	003	AdaLead (G)	-0.114751	0.0973987	1.68768
gosai_20053	GAATCAGATTCGACGGAGGATGCTCGACGGCAGATCAAATCAGAGTCTGGACCTCAAGACATCCGAAGATATCGAGGCTATCATGCATTCTTGAAGGAGTACATCGAGGCGCAATGTCTAAATTTAGATGATTCATCATCCGTCTTAACGCGATAGTTGCCCACCTGGCATCTCCTAGACTTCCTGCCCCCTGGCACCAT	003	AdaLead (G)	-0.151162	0.0297867	1.16701
gosai_20830	GAACGGTCGAGATTTCTTCTTAATCCGACGTTCTTAACCGCTTACGCATCAAGTTCCTGCAAATCTTGGTGCAAGACGTCGTAGGCACTCATGACCGACGTCTAAGACATTTCCGCCCGTCTTAAGATGGGCATTCCTTGAGGGCAATGACGTTGGTGAATGTCTTGATTTGCCTGGCATCTTGAACGGTTCCTTCAAGT	003	AdaLead (G)	-0.120031	-0.0702643	1.69911
gosai_23316	TAATGATCGAGTGATGTGATTTCGGAATTAGCGGTTAGACTGGATACCAAGGATGCTGATTCAGATTTCCAATACGCCAGATTGGATTTTCCCGCCGGATGTTCGATTGACGGAAATTCCCAAAATTGAATCACGTTGGCTTGAGAAGACAATCACTAAGCCAGACGTCAAATTTGTGGTACCGATGCTGGACTGGGTAC	003	AdaLead (G)	-0.0197235	0.340058	1.61802
gosai_21969	CATCCCGCTAAATCAGAGCCTCGACCGGGCAGACTGCGTGGCTAAGACGCATCCTTGAGCGAGAGTGAAGATGCGGGGCGGGTTCTTCAAGGAAAGGATGCTGCAATCTCCTTCGAATCGAAGCGGAAGCTCTCTACCACTTCCTTGATGCCAACCCAATCTGACCGTTGGCACGATATTAATTATAGGAAATGCAATAT	003	AdaLead (G)	0.208342	0.146083	2.07354
gosai_21279	CAATTTCGGAATTCCCCTAACTCGAAAGAAATCTTAAGCTCGGATTACAGAGTATAAGTAATTCCTCTAGAATGTGAAACCACTGCGGAAATCGACGGAACGAGCATCATCCAGTGCATAAATCTGTTATCTCGATGGTTGCGCTGAGGATGCCGCCGTCGAGGATCCAATCTGGTTCCAATCGATGCTTTCCAGCACCC	003	AdaLead (G)	0.0930217	0.22004	1.96667
gosai_22357	CATCGGGTACCCGTAGCCCATGACTAACGGTCATACGATGTAATTCGGGAAATTCCTTAAGTCCATCCAACAGTCCCGTATGATGTTCCTCGGAATTTCCCATAAATTGGCATCATACCAAGGATGTGACATCAATCACGGCTTGTCAATCTCGGTGATAAATCTCGAAGGATGCTTCTAGAATATGAGTGCCAGGGCAT	003	AdaLead (G)	-0.213752	-0.0127715	1.67147
gosai_22008	ATGCAATCGGCGGCAAATCTCAGCCGATCGACGGCAATCTGAGGATGCGTCTTGAGTGCCCGGAAGGATACGAATTTGCGTGATGCCTAGTTGGTATGAGTAACTTCGGGTCATTTCTTGAAGACGGGCGGCTGCGCATCACTTCGGCCAGTGATGGCATCGTATAACGTACCACGTGAAGATGCCTTGCCCGACGGCTG	003	AdaLead (G)	0.028675	-0.0787153	1.86574
gosai_23184	TGCCTAGAATTGGCATCAACGGATATCACGAGACACCAACTCAAGTTCTTAAGGATGCATCCTTTGTACGTCTGACGGCCAACTACGAAGGAAGACGTCTTAAGACGTCATGACGAATTGGCCGGGTATCGCGGAAATTGGTGCCAATAGAAGATACGTTGGCACTACATCCAAAGGAATGTGCCAGGCTGCCATTAAAT	003	AdaLead (G)	-0.242715	-0.0496597	1.61194
gosai_22730	TGAGCATCGATGCTATCCATTTCCCGCCAATTGGCATCCGTTAAAGAGATGCCTTCGTCTTAAGGATGCCCGCATGCAACGTATCTTCTAAGGCATCTTACCAATGATGTATCATCGACGCAGATTGACGACTGAGAATCGTGTGATTCATGCTATTTTTAGAATCGATGATTAAAATCTCAGATTGTATATGCATCAAT	003	AdaLead (G)	-0.357016	-0.0551845	1.42199
gosai_22155	AAGTCTTCCCGCCGTGATTTATGATTCATCGGAGGTCAATCACAGCCCATTGGATGCTAGACTGCCGTGATGCATTTCCGACGGAAAATCCCTACGTCGAAATCTGAAGAGCGTTCGCGCCATCGAATCCTGATTGATGCTAGAAGAAGGATGCATCTGATGAGCATCTTCGACGGCAAGGCATCCTCTTGATAAGAAAT	003	AdaLead (G)	0.0288938	0.293466	1.88047
gosai_23206	ATTGGACCACTTCTCGAAGAAGGATGTCTGAATCAGAGCGCATCCCTCGCAAGATTTCACCACTCCCGGCAGACAGCATCCCTTGGATAACGTCAGTATCTTCGATAACGAAGGCGGTGCCAGGCCGTCTAAGGATGGCATCTTCCGCTGAAGTTCCCGCCTTTCCTTCGCCCGACGAAGAGCCGTCAGATGGCATCAAT	003	AdaLead (G)	-0.210324	0.251859	1.62376
gosai_21097	CGCGAATCCACGACGGGCTGTCAAAGATGCTCATCCTTCTGAGATTCACCGATTGATGGAAGATGCCATAGAAATCACGACATATCTTGAGCGGATGCTCCATCCCCGGCTGTCGTGATTAATCATGCAATTATATGAGTGATGCTATTTTTAGAAACACTGATTCACGGACTTCCACAATCAATGGATGGAGTATAGAC	003	AdaLead (G)	-0.26934	-0.0967945	1.31477
gosai_21247	CGCGTTAAGGCATCTTCGACGGGATGCCCTTCCATCTTTATTCGGGAATTCCCAGACTGGACCATGATTTGCAATTCAGCAAATCCCGCCCAAACATGACAGCTTCCGTTGCCAATTATAGATCTGGTATGAATCAAATCACTATTATTAACTGATAGATAGTTGGGAAATCCCAGCTAAGCGTGGTACCCATGCCAATA	003	AdaLead (G)	-0.196471	-0.239812	0.654598
gosai_20892	TACTGGACCGAAGATGTTACGCGGATAATAGTCTGGAAAATCCCAGAGCTAGTTATAGCGATCATCGCGCTCACGTGATTTCCTTAATAGCATCCTCCTGATGGGTTACTATATGGGAATCACGTCAAGATGGTATATATATCCATTGGTGCCAGCCCTGACGCATCTTCCAGTTGAGTCTTAGGATGGACGTGCCAGGG	003	AdaLead (G)	-0.192789	-0.171551	1.48888
gosai_20340	TTCGAGAGCATCCTTGGCATGGGTACCAGCGGATGAGCTACAGTGCCCAGTTACAAATTCTTGGCCGGTGAGTAATAGTCAGATTGGGGGGCGGGTCAACTGGCATCCATCTATAGTGCCCGTATAATAGTCGAATTGGCATCAAACATGTATGTGCATGGCTCTAGTTGACTCATATGCCAGTCTGAGAGCATCCCTAG	003	AdaLead (G)	-0.187205	-0.22418	1.43432
gosai_22195	TCTTCGCGTTGGCATCGACGATGCCTGGCATCCAGCGGGTACGCATCCTACGTCCTATACGGTGACGTATAAACTCGCGACGTCTGTGATGCAGAAATCTGAGGAATGCGAATCGTCTGGCGCGAAATCACGGCCACGCCAGAGCATCTTCAGGTGCTATCTTGATGGACCAAGGATGCATCAGTGATGCTCCTAGGTAC	003	AdaLead (G)	-0.119781	-0.201319	1.59898
gosai_20264	TACATCCCATCAGCATCTTCAGCTTGCCCAGCCCTGGCAAATCTGGTTATCGTCGTGCGCAAGATGAGCCAAGACGGGATACTTCAGCTGTGATTAATCATAATGGGTGAGATTCCACGCCTGCGAAGACTCGAAGAACGTCGTGTGACGTATCCAATGCCAGCTGGCACTTTATTCGACGGCGATGCCAGTCTTGCGGG	003	AdaLead (G)	-0.233256	-0.121608	1.29668
gosai_21177	TCTTGGTCCATCTGCAAGACATCCTCAATCTCAACAAATCTGCGCGCTCCACTCGAAGGATGCTTGACGTCTGGAGCACGTGATTACGCATATCAATCACGTCCAGACGTCCGAGATTTCTTGAAGAAGATACCAGGGAGGATGGTACCGCCTCCAATCAAGATGCTGGTACCACGAGCGCTCACGAAGAAGATGCTGGG	003	AdaLead (G)	-0.315398	-0.0128126	1.60219
gosai_22235	TATGCCGTGATTTAAGCCGTGATTGCCCGAATCAGTTTCCGTCTTGGCGGGATTTCGACGTCGATGCAAGACGTGATTGCGCATCCGTCTTGAAGCATCAATCGGCGGACAAAGACGTTCTCGTGCAAGGCTCCTTCGGGTACCCGGAAGGCAATTCGATGGTACCAGGCAAGTCTTGACGTTGGCACCGATGCCCAAGA	003	AdaLead (G)	-0.309741	-0.0791549	1.5399
gosai_21289	TCGAGAACCGTCGTAGATGTGGCATCCTGGGAAACTCCAGCCGAACGGATGCTGTAGTGGAAGATGATGTCAAGCCTTGGAGTAGTGTGACTTATTGGAGGGATGGGTTACGATGAATAACGGAATTACTCATGCCAGGCGTCAATTAAGTCGGAAATCACAGTTCTTCAGTCATTATCTCGACGGATGCGCTGGAGGAC	003	AdaLead (G)	-0.244107	0.0675057	1.25468
gosai_23335	TCCAAGGAATGCATCCCTCGTCGGTTATCTGGACGGATGCCAAAGACGTGACTCACGAAGTCGAGATTTGCCGCAGGGATTTCCCCAGTTTCTGACCTCCAAATCAGATTCAATCACTTCCTTCGCATGGGCATGACCAAGTGATGCTGGAGCATCCTTTTGCCAACCGCATGCCAAGAGATGCTCGACGGCACCTGGCA	003	AdaLead (G)	0.604977	-0.0562666	2.54501
gosai_21262	TCTTGGCTTCGTCATGCGTTGGGATTTTGAGTAAATTCCCGACGGGATGCATGATGGGATGAATCATAAAGTGGGCAATGCCCTGGCATCATTGCGCATTGGATTCGACGGCTTCTCAAAGATACAGATAAGGGCCAATTGATACGAGGTAATCACTGATGATGCGCATCTCCATCCTCAGTAAATCTCAGACGGCACTC	003	AdaLead (G)	-0.3417	-0.116216	1.47767
gosai_23615	GCGAGAGATGCCAACTCAGTGTGATGCTCACTGGATGCCAACGCTACTCCGTTAGACGAGTCTTAAGCATCGGCCAGGAATTACGACCAACGACGCATTGCCCGGGAAGACGTCTCGGAAATTCCCCAGGCTGGATGTCTTCATCATTTTTGAGGGCCTGGCACGTCTTCCGCTGGGCAGTCTTAAGAAAATGCCCAAGA	003	AdaLead (G)	-0.146192	0.0623434	1.87294
gosai_21975	TTGGCACGAATATGATGCCAGGTGGCAGTGCCAACCCTTGGCAACATTTCTATTGAGTCAATTGGGGAATTCCCGATGGGTTGGGTACACATGCCATCTAGGTGAGTCATGCCCGTCTTGGGGGCATCGGGAAGATGGGAATGAGGTTGGCATGCACCAATCTGATAACTATGCCAACTGGCATATACCCTGGCATTGCC	003	AdaLead (G)	-0.256	-0.401187	0.685064
gosai_23483	CTATACTTAGCATCTTGAATGGAATCTGGAAATTCCCGCAACTCCTTTGCCAATCACCCGGATATCGTAGTCGAATGATATAATACCCGTCGTAGAATACCCTATAAATACGTGCCAGGAAATCAGTGCCAGGACGTCCAATGATAGACTGTGATTCCATGGCATATGATGCCAACCTCTGATTCACATTCCCGCCAAAT	003	AdaLead (G)	-0.182166	-0.163167	0.801172
gosai_20117	ATGCCCTGGCAGCATCGACGGCACGGTGGTGCGGTGATGCTATACGAATCCGTACGCGCCGTCCTTGATACGCGTACGTTAGAATGTCTTGAGATGGGCATCATGGGATACCAAGGATGCCATGCCCATCCCCCACGCCATCTCCCCAATACAAAGGAAATGGGAAATTCCCCAATTTAGACGGCTCAAGATGTCTTAAT	003	AdaLead (G)	-0.0230657	-0.321397	1.65503
gosai_22356	TCCGAGCCGTCTAGCATCGATGCTAGCATTCCTGGAATTTCCCGTCACACGACATGAGATGCCTTAATACTCCGAAGGCTGCCAGCTTCCTTTGATGACGACGCCCATCTTATCGTCGAATCACGAAAGTTGCAAATCACAGCATCTTCGAATCGTGATGCATCTCCGACGGCTGTCCAGAGATAGAAGGATGCTCAAAT	003	AdaLead (G)	-0.180327	0.160944	1.83752
gosai_22996	ATGTAATGCCCAAGGAATCTGACTTTGGCACTGCCTGGCATGCCAGGGTGAGTCATTGTCTAATTTTAGTATCAATTGGAAGGAGGTCAAATGACTGTGCCAACCACTCCCCCTGGCATCCACTGATGCACTATAGTTAGAGCATTGCCCTGGCATGGGCAATGGTACATGAACCCATCATAGCATGGCACAAGAAGATG	003	AdaLead (G)	-0.401922	-0.366167	0.512384
gosai_23287	CCGCATCCTCGACGGCGCAAACCCTGCAAGATGCTTATGGTACTTCGAGAGGATGCTCCGGATGGGCGGTGCCAAGTGCTACTGGTATGCCCAGATTACTCATGAGATGCAGTTTACCATTATTGGGTTGGCATCAATTACATCACTCGCACTGGATGGCGCAGATTGAGGAATTTCCTCCCGCGAAAATCAAGACCATC	003	AdaLead (G)	-0.373061	-0.285907	0.686995
gosai_22343	ACGGCTCGACGGGTACCAAGGAGAATCGAAGACAGTAGGACGTGATTTAAGTTGAATCAGTGCCTTGGTCCATCCAATACTCGATTAAGAAGGATGTGATCCTCCCCCTTAAGGAATCACGTATATGCATAAAGTTTCCTTGGAAGAATCTGGGAAATTCCCGATGAGACATATGGAATTCGGATACAGTAAAGACGATG	003	AdaLead (G)	-0.372034	-0.011993	1.32402
gosai_23235	CCGCATCGGATGCTGGTGATGCGGTACCCTGGCACGATGCCCAGCCTACCAGCATCCCAGAAGAATCTGCGCCTTACCCAGAATTAATTTCCCATTGGAGCGGTTACGTATGGGGTAATAAATCACGTCAATTCCCGCGAGACAGATGCTATGAGATGCTGGAGCATCCTTATCGCAGTTCCTGCCAGGATGCACCTGTC	003	AdaLead (G)	-0.146713	-0.226417	1.31079
gosai_22113	CCTTCTACATCCCGCCTTACACGACCGTCGATACCATACATCCCTTAAGGTCATGATTCATCTTAAGATGCCAAGTTGGCTACATACCAAGATGATGCATCACAGTAATTCCCAAGAAATATTTCCTGCAATCACAGCAATGATATCTGGGATATCTAATGGGGAATTGCCAAAAGGATGCGCCTGGCACGATGCCAGGG	003	AdaLead (G)	-0.0305328	-0.160597	1.81044
gosai_22717	TGCCAGGACGTCGGTTATTACTAATACTGGAACCTGGCAGTGACGTGCGCGATGCCCAACCTGGTAACCTGGCATTGCATTTATGTAGTATGTCATGACTCAAGAATGTGAATATGCCATCTCCAAAAATCAATCACATCCGGGGGATGCATCCGTTCCTTAACCGAATATGACAGACGGGCGATGTTTCGAGGTAGCAT	003	AdaLead (G)	-0.0873476	-0.275888	1.12922
gosai_20957	TCGGGGTGCATTTTTTTAGCATCACACTGGGCATCCTTCCTATGTATAGTCTGCCAATGCATGGCACGTGTGATTCATAAACTTGGATGAATGTGAAGACGGCGGAAATTCCCAATTTTTTCCATAGCCAGTCGGTCTAGATGCATATCTGGAAATGTACCACTTATCATCCGGTTGGCACAGTCTTGCCAGGGCAGTGC	003	AdaLead (G)	-0.203466	-0.233595	1.07628
gosai_23738	TCGTCGACGTCTTATGACGCAAATGCCAGGTCGCCTGGCACCACTTATGATGCCGTGATGCCTGTGCCAGAGTGATGCAGAGCCCTTTGTGCCAGGTTGCCACGCCTATTCGTGGGCATCATGGGACGGAAGATGCCAATCGATGTAATTGGACGTCCGTACGGATGCCGTTGGCAGCCCGCATCGTTGGCATCGGGTAC	003	AdaLead (G)	-0.128821	-0.30947	1.5191
gosai_20463	TCAAGAATGGGCTATAAATAGAGATCTAGAAATGACTCACGACATGGGATATTCCGAATTCCCGAATCAGCATCCTTGCGCAGAGATTTGGCGGGCATCTTCGACGGGTCCCGCCCCTGGCACAATGCATCCTCTTATCAGATGGCACCGATTGAACAATGCCAATCTGTGGACCGACGATGGATGGATGCTATGGACCA	003	AdaLead (G)	-0.239703	-0.293875	1.0065
gosai_22251	TTATCGGAAATTCGTCACGTCGGGAAATTCCCTAAGTCCAAAAATAGTGCCAGGTTGTGCCACCTGGCAAAGTATTTCTTGGACGCATCAATGGCGTCAGATATGCCCAATTGAATTACCACATCATAAGTGAGTCATGCAAGGAATGGTACCAACCGTCTTGAGGTGCCAGGCATGAACCACTGAGTATGGGCATTGGG	003	AdaLead (G)	-0.451052	-0.318366	0.590701
gosai_22321	TCCAAAGATGGTGCCAGGTTGCCAATTATAGCGTATAGGTCATATGGTGCATGATGAATAAGGGTGAGAAGTCTCCAGCGATGACTAAGATTACGCAATATGGGTAAGATTCAATTATTAAGTTAATGCCAGGTACCATGATTAGACATCCCTGAGTCATATTGATGGTATCTAGAGAGTGATGCCAACCATTGAGGTAC	003	AdaLead (G)	-0.107773	0.122762	0.546533
gosai_21000	GGTGATGCCCACGGATGTGATGCCAATCTGATTTTATCTAGGCGCGCATCACTCGCCTTGGCATGATTAATCATATGGGATATTCCCCATTAGTTAGGTATTTTTAGTCACCAGGATGTCCGCTTAGAAGGAAATGATGTCTTAAGATGCCCAATTGGCAGTGCCAACTAACGCCTGGCATCTACCCCTGGTACCCATCG	003	AdaLead (G)	-0.4502	-0.367796	0.456776
gosai_23827	TCAAATGATGCCAGTTGGCATTACCATGCCCATGGATGCCACATCGGAAATTCCAATTTCACGAGGTCATACCCCAAGAATCTGAAAGCAGACTGGATAAGCATCACCAAGTGATGCTAGCGCCGAGATTGATTTCCCCGGTATCTGGTCTGCAAATGATGCTCCATCCTATGCTGGTTCACACCTTAGCTTCTTAGCAT	003	AdaLead (G)	-0.423747	-0.38303	0.440206
gosai_23278	ATGCTTCGACGGCGCACAGATATCGGATGAGCAGCAGTGATTCAGTCGAATGCTGTGCATTGCTTAAGAAGGCAGCGCATCTTCAAGAACAGCGGAAATTCCTTAAGAATCTACGCAGATTGAGTTGGAATTTCCCCCAAGAAGTCATTGCATCTTGAGTCGTCAACTGAGATTCCTCCAACTTGACAGACGCAACCTGG	003	AdaLead (G)	-0.502378	0.10997	1.45498
gosai_21091	TGATTGAGCATCATTGCGTCTAAGTCGTAAATCACGGCTGTCGAATCGTTATCTGACGGCCGTTTCTTCGACGATTCGGCTGATTAATTGAGCCAGTGATTAATAATAGCTACGACGTCGGTACGTCATCGATGATGGATTTCCGATTTTCCCGTAAGCATCCTTGAAGGATGCTCACAGCATCTTAAGGGATGCTTCAC	003	AdaLead (G)	-0.351031	0.0755349	1.1968
gosai_22718	CTCGAAGGCTCTGATTGAGCATCTTCGGGCGGGTCAATCTGAAGATGCTGAAGGATGCTGACGCATGAAGAATTCGCGATACCAGATTCGTATCCGGTCCCGGTACGGCATCTTGGACGTCCGTTGGCATTGGAGGATGGCATGTGATGCCAGGACGACGGCTGCGGTTACAGACAAAGGATTCTTGGGTGCCAACTTGG	003	AdaLead (G)	-0.329888	-0.258109	1.07092
gosai_21351	CCCGAAGATAGCATCTGAGATTGGAGTGATGTGATTGCCGTTGGAATGCTGAGTCGTGACTAAGGATGTCGGAACGCCCAAAAGATGCCAGGGCATCCATGGGGCGTGGCCCGTGTGCATCATCCGCTGTGCCAGGTGCCCGAGCGGATGCGCATCACTTGGGCGAGCATCCTTCGAGCTGTCAAGTTGGCACATCCTGG	003	AdaLead (G)	-0.289768	-0.223686	1.3977
gosai_20822	TGTGGACCAGGAGGACGGACCATCATTGGGCATCTCTTACGATGCCGTCGGCGGATGCCCCGGAACCCTCCTCCATAAGATGCTCTGGCACTGATTGCCCCGGAAGGTATGTAGAATGAGCATCATTCCCGGTCTTCTTGAAGTAATCTGCAAGACACTCCCCTGGGTCTAAATATAGTCATGCCCTAGACAGCTGTGCC	003	AdaLead (G)	-0.181764	-0.464756	0.836705
gosai_20241	CTGATGCTTATATATAGAAATCACTGCTCCATCTCTGAGCATCCTTCTCTGCGTTATCTATTGCGGAATGGCGCAGGAAATGGATAACATCACTTTCGGTTTATTTATAGCGCTAATCGGGCGCATCCCTCGAAAATCACTGCTTGTCAAGAAGGATGCTCCACTGGGGAAGGATGCTCAAGCGGGTACCAACTTGGCAT	003	AdaLead (G)	-0.29777	-0.368379	0.749157
gosai_22709	TTATCCCGGGAAATTCCCAAATGTAACATCCGTGCTGCTTAAGACGAAGGAATGCATCAATTTCCTTTAAGGATGATTCTTGGTATAAATCTCTGGCCATCAATCGTTGACGTTACAAGTGACGCGATACGGATGCATAAGGATGCCAAGCCGGAGCATCATAAGTATAGCATCTTCTCCTCGTTTGAGCATCATTGAAT	003	AdaLead (G)	-0.367507	-0.100226	1.48329
gosai_21786	GCTCCTTACGTGACTTATTGATGGAACGACGCATTAACCAAGAATTAGGTCATGGAAAAATTATTCGTGATTTATAGCCTGGCATCTTGATTGACAGCGGATATGACTCAATTCCATAAGTCATAAGCAATCAGTAATGTTCCAAAATCACTTCGACGGCATCAATTCCATATCTCTGCACCAAGAATCCTTCAATGGAC	003	AdaLead (G)	-0.208122	0.307639	1.35272
gosai_21822	CAGTAGGCTGGTATGTGGGTGATGCAGGGTACCTGGCATATGCCAGGGCAAAGAAGTGATGCGAGTGCCACTTCCTTCTTATCGTATCACGTCAATGCGCACTACGACGGATGTACGAATACCCGTATGGTCCATCCAATTTGATTGTGCCAATCACAGCCGTCGAATCCAAGATAGGACTTGGTGCCAGCATCCTTGCC	003	AdaLead (G)	-0.437292	-0.292794	0.732825
gosai_21718	TCTCCCAGGAATGCAATTGATGAGCATCCTTAGCATCATATGATGCGGACCAGAAATTCGCGTCATTATCTGCGCATCCTACGTCTTGGAATGCGCCCGTCTACGAAGAAATCTGAGACGTTGACTCACAAGGAAATCTCGCGGATTGACACCCGTAAGGATTCGGTCGTGATTGATTTTCGACGGAGATGCTGCGATGC	003	AdaLead (G)	0.130254	0.169363	2.15926
gosai_22563	TTAAGAATACGCAAGGCATCTTGACGCATCCTGTACATCTTAAGACGGAAAATCCCGACGCGAAAGTCCCAGACCATATGACGTTCATCATTCCTGGATACTAGATTGCAGAGATTTCTTCGCCTTGAGCGGTTGGTCCTCGCGAGGATGCTTTTATAGAAATCACAGATTGAGTGATACCAATTGGCATCGGATGCTAC	003	AdaLead (G)	-0.294309	-0.242251	0.924369
gosai_20064	TCTAGGATGCCAGCCTGGCATAAGAAACTTCTTGAGACGTCGGAAGTTGACTCATGCCCAACTTGGCATCATTATTTATAGCATCCAAATGATATCAATACTATCGGAAGCTATTTATAGATCTCGATTGCGCTCAATCTGGGAATTCCTTGAGATTGATGCGACGGCTGAGATTTGTACCAAATGATGGTCCATCCCAT	003	AdaLead (G)	-0.367752	-0.288499	0.95588
gosai_22383	CCAGGCATCCGATTCGACGGCTTATTCGATGCCCCTAAGGATGCTGCATCCTCTCGACGGACTTCGAGTAGCGTTCCTTGGACGTTAGTGCGCATCTTACGCCGTCGACGACGTATGGCACGTACGTAGGCATCATCGTATACCCGGATTGGAGCATCCGTGCCAGGGGGCATGGTACCCAGTCAGCATCTTGAAGGATG	003	AdaLead (G)	-0.278321	-0.2334	1.48825
gosai_20591	CACAGCATCTCGACGCGACGTCGTTGGATGCATCCCTGATTTGAGTGGGAAGTCCCTTAAGCATCAGATTTGATGGATGCGTCAGCATCTTAAGGATAGATGCTTCATACGTCTTGAATTACGTCAAGTAAGTTGGGAATTCCCCAAATCTCAGAACATCATTCGTGATTTCCCCAAAGATGTTAATGCACCTGCCAAGA	003	AdaLead (G)	-0.441619	-0.0564529	1.49534
gosai_22347	TAAGGCGCAAAGAATCTATTAATAGCATCCCTTGGCACTCCTTCCTTACGCCAATGCCAAGTTATCGAGGGCTGGCCCTATCGATGTTATCGTCAAGGAGATGCTGAGATTTCGTTACCAACATTCCTTAGTCACTACGTGATATGCAAGACATCATTGGGGTTGGCATCCCGCCTTAAGGGATGCCAAAGAGTGGGCAT	003	AdaLead (G)	-0.441884	-0.428292	0.487074
gosai_23972	TGCCTGGCATCCTGGGCAACGCCCCTGGCACTGATAGGTCGCCTGGCATGCCAACAGAGCCGCCATTTGGTGCCAACGGATGCTGGCACTTACGTATCCGGCTTAAAGATGCCCCGGCCCGGATGCAGTTCTTGGAAGATGCTGCCAGGCATCTAATGAGTTGGTGTAAGTGATGCCAATGTTGGGGAGTGCCAACTCTG	003	AdaLead (G)	-0.405923	-0.479356	0.558357
gosai_23455	GATGCTAGCGTCGACGGATGTTCGACGCCCAGTCAGCATCTTCCGACACGCTATCATATCTCGAGCTTATCGGCATAGGAATCTGAATCTGATATCCTGTTCATTCGGCTGAGATTTCCACTGTGCCAACCGTGAGTCATGATAGCTATTTTTCCATCCTTGAGCATCCGCCTGCATCTTACGGTACCCAAGGATGCTGG	003	AdaLead (G)	-0.0548284	-0.317017	1.69247
gosai_23121	CCTTCAAGGATTCGACGGCTCAAGGAGAGATGGAGGAACCGCCTATCCGTAGCGGCGTACATCCTTCGCGAGTATCTGGGCAATAGCATCCTTCGCGGGCCGATGGAAGAAAGGATTCCTCGACGTCTAAGACGTTACGTAGATACGTTACGTAGGAATCCGACGCTAAATCTCAGTCGATGCAAGAAGTCAAGTGATAA	003	AdaLead (G)	-0.388208	0.0739031	1.2279
gosai_23457	GGATGCGAGTAGAGCATCACCATCATCAGGATGCTGTACCACTCTGCCAGCAGGGATGCCACGACAGTTAGCGCCAATGATGTGATACGGGCACATTGATGCCCAGCCGGAATCGGCGTCTTAGTAGTTGGTACCCGGATGCTGGATGCCGAGATACTACGCCTTAAGTGCCCCGGATGTATTCATTTATGCCAGGCTGG	003	AdaLead (G)	-0.335471	-0.453165	0.726923
gosai_20470	CCTCTGTGGTGGACCATCCATCCTGCACATCTTATGTGCCCCGTCGAGGAACCGAGCATCACTTCTGGCGGCAAAAATAGAATGAAGTTCCATAACATCCATCACCACGTCATATCCGTGATTAATCCGATTAATCAGTGATTCGTAATCTTCGGAATATCCAGGAATTCATCCGGGCGAATCTTTTTATCGGGGGTTTC	003	AdaLead (G)	-0.267733	0.356524	1.20574
gosai_23566	GCAAATCTGGGCACGCCAATCAAGGGATGCTGAGCATCATCCGGCAAAAGGATGCTCAGCGCATCCCAGCATCCTTTTTTAGCCAATGATGCCAGGATGCTTCTTGAAGGAACTCCGCCCACTTCGTATCCGCGTTGCAATCTGGGTTAAATCACGTCTTGAGAGCATCCTTGACAGCATCTTCACGCGAAATCCCGTCG	003	AdaLead (G)	-0.113646	-0.117613	1.79122
gosai_23721	TCAATCGATTCTTGGACACAACGGGAAGGAGGGATGCCCAGATTCATATCGTTGGCATCTCCAGATTGCATGATTGGCACTACAATGGAAAATTTATTCAGCATCCGCCTTGCTTACTTCCCTGGCACAGTAAATCAGCTGTCAACCAAGGATGCTATTAATATCGACAGGATGAATCAGTGTAATGCCCAAATTGGCAT	003	AdaLead (G)	-0.345484	-0.368357	0.946364
gosai_23893	GTACTGGCATCCTGGGCATCATACCCTGTGCCAGCATCCTGGCACTGGCACGATGCCAGGTCTTGCCAATATTGGATGTTGGGGCACGTGACTAATCACGTCTTGGCAATGCCCCTGGCATGCCCAGGGAATGCCCAGTTCTAAAAATACCACTCTATTGACCTGGCATCCAAGACAGGTAGTCTCCTTCTAAGAATTTC	003	AdaLead (G)	-0.389064	-0.319057	0.31336
gosai_23101	ACCGGATATGGTCTTATTGGTTGATGCCAGGCAAGGATGCCAACTTAAGATGCCAGGCAGGCAATAGGCGGGTGGCACTGACGCACTGATTTGCGTGACGACAGTCTCTCGAACGCCGTCTGGTACGTATTCGCGTTCGACGGCGTTAGGCATCTTCGACGGCCGTCTATTGGTCCATAGCATCTTAAGGTGGTACAAAT	003	AdaLead (G)	0.977949	0.484577	2.1206
gosai_22068	CCTTCGCTACGTCGGAGAGCATCTTAGAATACTACATCCTTCGAGCCGTCGTAACCTGGCATCGACGTAATATCTGACGTGACTTAAGGAACGTTGGCATCTTAAGACGGAAGTGCCAAGGCGCCAATCATGCTACGCCAGTGGGCACATGAAGAAATCTCAGTAGAATGTGATGCGATAAGAAGTGTCAAAGAAGAAAT	003	AdaLead (G)	-0.266232	-0.106581	1.18383
gosai_39313	AGGGAGAACTCGAGGTAATTGCAGCGCATCGCACTACGTGCTTGGGATATCCCTTGGGCAGGCTGTTTGGCCGGGCGATCGAACAATCTCCCTCACCACAATCCCCAAGTACCAGTCTTCAGATATAGGAGTCTCGGCAGTCAGAACCCCAAAACACTTCTAGGAATATTGGGTTGTGGGGGTTAGTCATGATGATGACT	003	FastSeqProp (G)	-0.350015	-0.0610601	-0.375838
gosai_41204	TAGGCTCCTTGATAATCAAAGTCGCCGGTTCTGGTGTTACCACTGTGCTTGGACCAGCGGGTCACCGGGTCGACATGGGTACCATGCACGATCGTTTGACTTTTCTAAGAGTTGACCACCTGTGAGGAGCAGGTTTTCGCTGGAGTAAAACTCTATCTCTGCACGTGGGCCAGTAGCTTCTCCCAAAAAAAGTGCTGAGT	003	FastSeqProp (G)	-0.375502	-0.142127	-0.49402
gosai_41244	TGGGTTAGACGCTCGTACCTGTGCAGAATTTATTGGTCGCCGCGCACTGGAGCATGGATCAGCGTGCACCGGCACAGGCTAAATCCGTACAGAGTTAGAAATGCGTCTATAGTCCGCTACTCATCAATAATACTTGACGTTTCAAGGTTCGTTCTGACTATAAACTGTGTCGCGCTCGACTATTGATAATGGGCCACGCC	003	FastSeqProp (G)	-0.266042	0.00336625	-0.339687
gosai_24704	GGCGGGTACCGTCGGACTTCCCATGTGGCGCACGTTCATCGAATGTGATTTACAGATTTTATTAATTCAATCAGCCCTTTGATCAAAGCGCCTTTGTTCTTTGGACTTTGAACCCAACGTAAACATTGATAAATTCGCGCTATATCCACATCCGAAATATTGCGGAGTACAGGTGGGCATCTCAATGGCATCAGGTTGCC	003	FastSeqProp (G)	-0.400758	-0.173436	-0.241317
gosai_36350	TGAAGTAGGTAAGGGAATCGACGGTCGGTAGATATTGGCTGTCGTTGGACCACATTGTAAATGCACCTCTGAAGACCCACTGTAGATACCTTTTCGAGGGACTCAGTCCGCTAAAATAAGCCCCCAATACCCTGCCCTTTGTTTTAACGCGTCGACCCGCGCTCCTCGAGTACTTCGACGTGCGATTCCAATTCTAGCCA	003	FastSeqProp (G)	-0.364548	-0.274045	-0.581259
gosai_47499	ATTGTTCAACTCTTTGTTGCGGGAAGTGCAAGGTATGATACTATAAGTCTTCTTATCCTGCCCCTCCTACCTTCTTCGCGGGCATCCGACGTTGCCAACGCCTGGCATGTCCTGGCATGCCCGACGAACATTCGGGTGATGCGAGTTCGATTACGAAATTCCGATATAGAAGCAGCCGTGTAGTTATATGGACTGGGTAC	003	FastSeqProp (G)	2.29151	0.0897427	5.2319
gosai_48342	GTTTTTTCAATCAATGTTAAAGTCGACGCCCATTGGGATGCTCAAATTATCGATAGCCTCTTAATATACTGGTCTGTCATACGAAAGGGAAGACGTCCCTATTACGTCGTCTGGATGGCATCTTGACGGAAGCGAAAGCAAAGCCTATAGCCTGGCATCCTTGCCAGTGGCACTTACCGTGCTATAGTAATGAGCCGTAC	003	FastSeqProp (G)	0.465871	0.0588919	2.54019
gosai_47549	GCTCGATAACGTTAGCATCCTTCCTGGATGCGCGGGGTGAAAGATGCGAATTCGGCGAATTCCCCACATTCCTTAGGAATGACTAGGGTACGAAGCTGGCAACCCTTTTGAAATCCTTAGCAAATTCGGGAAATTCAAAATTCCTGAGATACTTCTCCGACGGATCCCCTTTGCGGAAAGAGTGTTGACAAGATTGGTAC	003	FastSeqProp (G)	0.475656	0.135248	2.46008
gosai_39879	AGGACCAAGTTTACTCGATAGTATACTAGAGTTGATGCAGTTCCACCACAAGAACCCGGCTAGATATAACTGTACAGAGTGGTGCTCTCCATTGTGGGCTAATATACCATCTAGTAATCGTGAAGAAGTGCTAAGAAGATGAGCCGCATAGTAAGTGCAAATTGCCTCTTTGGGAGAAACCCTCCTAAAAAGTGCTGAGT	003	FastSeqProp (G)	-0.0738288	-0.0526805	-0.30672
gosai_41211	TAGTCCTTTTCGATAGGTATAGTCCAAGATCGGTGTGAGTCCTGTTTCTAACTGGTGTTATGCGCCGCTAGTCGTCTTGGTCGAAGACGGGGCCACTGGAAAATATCCTCAGCGGGACCCCGATTCACATGCTTCTACATTAGCCCACACTAGTATAAGAGTATGTGGGAAATGCGATCCCAAAATTTTTGGGCCACGCC	003	FastSeqProp (G)	-0.0755366	-0.0817163	-0.191242
gosai_47078	CATCCTACACGGGGGATCTGGGCAGCCTGGCACTGCCTGGCACACGCCATGCTACGTTAACGTCGGGTCTTACGTTCCATTACGTACGTCAACACGACGCAAGAATCGGCCGTGCCTGATTATTATTTAGATTGATTACATTTAACTTTATTGATTTACAAGCGGAATAAGCATGAACTCAGGTGTCTCGGGCAGTGGAC	003	FastSeqProp (G)	0.604751	0.015766	1.44722
gosai_48385	TGAGTCTCTCGGTGCGGCAATCAGAAGTACCGTATGCCACGAAGAGAAGCTGAGAATGGCAATATATTTAACGACTAGAACTTCCCCCATCCTCCTGCACGGGCGGATACCAAGAAGGCTGCCAGGCATCTTCCGGTTACGATGCCAAGGTGGCGCAACTCGCTGTCGAGATAAAGTAATCGTCTGGTGGTTTGTGGTAC	003	FastSeqProp (G)	0.682095	-0.0294016	1.68937
gosai_50770	GGCGGATTGATGGAGCACTACGCGACTCTCCGTCCCCGGGGCGATTCTCATGTAAGAATATAGAGGCTAATAATAGAACATCCGGCTGAGATTTGACGTCCATTTGCGATGTAATTACGTCTGAATAATTTGTGGGGCGAAGGAAGATAAATTTCGAGATGGAATCTGAGCTGGAGACGTGCGTGGGTAAATCTTAGGTC	003	FastSeqProp (G)	0.509547	0.159678	1.53038
gosai_44625	GGCGAGGTCATTGTGTGTTGGTGTCAGCATGGCCGAGATTGTGTACCCGTTGAGTATAGCACGTAAATGAGAGCGTAGTAACAAATTCAGTTCGCGAGTTTATTCCAAGGACGGTTAAGGCATAAATCATGGCAGTAACTATGCCAGCGGGAAATGGAATTTGTCGGAAATTCCATATCACGGGAAATCCCCAAAGTTGG	003	FastSeqProp (G)	0.469278	0.11024	1.44923
gosai_44536	ACGTTCCGCATACCAAATCTCTGCTCTAGCCTTTTGTTAGGGTGTAGAAAGAACATCGGAAATTCCGCAGACTAGGGACGCCGCCGTCGGAAATTCCCAGAATTTAAGTAGGCACGTAGAGATTTATTTTTCGTTCATGACCTTGGAACATAATTTGCGAATCCTAAGTCGCAGAAAATCTCCCTTCGGTGTATATCAGG	003	FastSeqProp (G)	0.541762	-0.0202111	1.24269
gosai_47456	ATAATAACCTTCAATTAACCCATCGGCAAAATCAGGTTTCAGCCCAAGCAATAGACCGGATAGAGTTACGCCCCGGATGATCGTCTGATATACAGCCTGGCATGCCCGGTCATACTCAGTTTTGCCCTATCACGACTTAAAAAGTAACGTCTTATTCTACTTCTGTACGAAACACAGTTAGGCGCATATGATCTTGGTAC	003	FastSeqProp (G)	0.516952	0.131437	1.61914
gosai_50294	TTCACGAGCCCGCTCTGAAGTAGCCAAGGGAGAATGAAATCACTGCCTCGGATGCTATTTTTAGAATTCGACAGAAATGCAGTCACGACCCTCTACTGGGTAACCGCCCAGTTGCCACCATATTCCCGTCTATCATTGGTACCAGAGTTTAAATATTCGGGGTCCTAAGCATCAATATTTTACTCTTAGCTCGGATGGAC	003	FastSeqProp (G)	0.460993	-0.0944113	1.56802
gosai_46583	ACTATGGCGTTATCCAACGGGACTTGGCAGTAAGAAAGAATCGAAAAGACTCGGATACGAAGACACTGATTCATCCTTCCGAGACGTATACTTCGTCTGTCCCTTTATCTGGGACGGACGAAGGACTCATTCCCCAACAGGGTGTCCGAAGATGGCAGCGTTTTGCGTCATCAAACCTAACTGGGGGACTTGCCACCTGG	003	FastSeqProp (G)	0.626451	0.382951	1.47841
gosai_47284	AGATGGTCCATCGCTTCGAAAGTGAGGCACACCCTCAGTTGTACGGTTTTAGCTACTCCTGGGCATACGCCCGCTCCCCCGATACGCCTGGCACGGATGACGTTGGCACGCCCAAGATGGCCTCGAGGCTATTGTTTCATACTGAGAGTGAATATTTCTGTCAAACGCATTATTGGACCTGTTACGATCGGATCAAGCAT	003	FastSeqProp (G)	0.715234	0.0393712	1.98255
gosai_36590	AGGGGTGAGACTTAGCACGACTAGAACATCGAAGAAGCTGGTCCTAGTGGGGCAGGCGCGCTTAAAGCGAGTGAGAGAAAACCGTGCTGCCCCGTGAAAGTCGACTATCGGAGGTTAATTGGCATAGTCACCTGGGCTCCTAGTAAACCGTCAGACCGCCGAATTCCACGTCCATCTGGTGTGGATCGATATGCATGAGT	003	FastSeqProp (G)	-0.103268	-0.0179474	-0.00686903
gosai_49108	TCTAGGATCCTGCAGACAACTCGCTGAACGGAGAAGACAACGCTGGCCTTGCGTTGCCCTGGCATGACGGGAAGGAAGTACTCAAGCCAATGCCTTCCCAGATTTCTTCACGTCGTAAGTGTGATTGCGGGCGAAGACGCCGTATTATTTTAAGCTTATAAAACATCTCTCGTAAAGTAAACCCCGACATACGAGGGGAG	003	FastSeqProp (G)	0.342179	0.0293592	1.37744
gosai_46441	CCTTCGACAAATATGGCCTTGCTTGCACTAGTAAGGCATCCAAAGGTACGCCCTCTCACCTAAGCTTGACGACGTCTTAAGGATGACGTCTAAGACGCAGCGATGAGGCAAATCTCGGAAATTCCCTCATTCTTATAGTATTAATTAATTCGAATGCATTGTGTAGAGCTAGAAATAACTGCGTATACTCTTGCTGAGGC	003	FastSeqProp (G)	0.623902	0.385589	1.51643
gosai_43336	TAAGGCTCGAGCATCCTTCGTAGTGTCTGCGCCTGGGACAATACCCCCGAGGATGCCACGCGGATGATGCATCCCTTTAGCATGCTATGCTATGCCGTAAGACGTATGCGCATCCTTTGCCACGTATTTGCATTCTTGCAGAAATCGCAGCATCTTCTTCAAACGACGCCGCGGGTGCAATTCGACCTGATACCGCTAAT	003	FastSeqProp (G)	0.366155	0.0581389	1.64812
gosai_48499	TATAGGATACGCGGAAATTGAGCATACTTCTTGACACTCTCCCTCGGATGAACGAATTCGACGCGTCGTAATAGGATGCCAACCGGAAATAGCATCCTCGAGTAATCGTCGGCCTGGCATTCTATTTAATATTATGTCACTGCCTAGGTTTTAGATGCCATCATGTTGGTGCAGCTCAGGTATTGCGTGAAAATGGGTAC	003	FastSeqProp (G)	0.436962	-0.0414864	1.24826
gosai_46960	TTTTGTGACTCGAATGTCGCTCGCCCCATCAAAGGGACACCTATTAATAGAGTCGGTGCTACTTCGCATGATTCATCGCGCACCACATATGTTAAGAAACTAACTGTTCAGACGTGTATACGCGTAGCGGATAACAGGGGAATAGGCTGGCACCAATCTGAGTCGGACCCATCAGTTTCGGATTCGAACCGGAAATAAAT	003	FastSeqProp (G)	0.500063	0.135229	1.30171
gosai_47275	CGATCTACTAATAGCATTTCCAGAACGGTAAATCCACATTGTCATTAACCGTCGAGGAATACATCTTCCAAGACCTGGCATGCCCAGGGCATGCCAGGCTCATGCTTGTCTCTCAATATTAGACTCGATTTATCCAAGATCCTACCTGACGTGTGATTTTTCGGATAGGTCTGTACGGGACAGGACCGTTGTGCCAGGAC	003	FastSeqProp (G)	-0.229904	-0.329913	-0.0385054
gosai_47338	TCAGCGCTAAGCCCAACGAATCATCAGTTGTGCCAGCCTGGCACATGCCAGTCAGGAATGCGACATCCGTCGCATTCAATGCCAACGTAGTCCTTACGTCATTACGCCTGGCACGAGTATTCGAAATTACAAAGGTAGTAACTCAGAGCAAATATAATGAGCGACAGGTCTCTATGTTGGAGGTATTCGATCATCAGGAC	003	FastSeqProp (G)	-0.176075	-0.279431	0.157489
gosai_47447	CTAGGTCCATACCGCTGGTGTTCACTCGCCTACGATCAGATTATGCCAAGGGCATTGTCATGCCAGGCTTACGCAAGATGTGCCGACGAGAGTGAGCGTAAGAGACTACGTTACGTTGGCACGCCCAATATACGTCTGTAACGTTTTCTTAAGATGTATACAGACATGTCTATGGTACTGGAACAGGAGACGCTCTGGAC	003	FastSeqProp (G)	0.474333	0.169296	1.65478
gosai_49976	ACGTCCGTGCGCATATGGCGTTTTCCAGTTTCCGCTCACACGGACAGTCAAGAAACGACTTTAGCTGGCTATTTCCATTTGTTTCAAGGATGCTGCATCCTTAGCGGACATAAGTGACGTCGGAAATCCCAGATTCCTTAACCGTTTCGGAAATCCCAGTGATCGGAATCAATCGACTCTAAAGAGTGTATGTACGCAAT	003	FastSeqProp (G)	0.738564	0.329219	1.47178
gosai_50876	GGCCCAACGACGTTCTCAAGTCTGATTTGTGCAAAACCCTCCAATCATCAAGTAAGTGATGGATCAACTTAATTGCTTAGTACGACGATCCACCGCACGCGTGGATGGCACGGATACTAGGATTGTCATCCATGATGACCCGGATGTAATCGTTCAAGAATTTTACCGATTTTGCATTCATGTGATGCCTCCCAGCCTGG	003	FastSeqProp (G)	0.229966	-0.0359613	1.56145
gosai_48578	ATCACAACGGGACATGACATAGTGTCGCACGAGGTTGGTATGGCTTTCGGGCACGCCGGCGCCAAGGACTTTAACTGCTTCGACGGAAGGAAGCACATTCATTCTTACGCGGATGGAATCGGATGCTATTGATAGATCTTCCGGTAATGAAAAATCCCCTTCCGAGTGGGCTTGTACGGCACCACCAAAGTGCTAGGTAC	003	FastSeqProp (G)	0.372777	0.154822	1.56032
gosai_45492	AAGTCCTATCGTGATTAAGAAGGTTTTTCTATGTTCTACTCTCGGACTAGACAACCGAGATTCATCCGCCGAGAATTCTTCGACGAATCACATGACACTAAGCTGCGTGTTGGCTTCTTCAAGAATGGAAGTGATGCATTATCAGCCTGGCATCGCCACCTTCGATTCATTGATAATGGGTGGTGGCAGCTCTCGCCTGG	003	FastSeqProp (G)	0.597021	0.334917	1.41411
gosai_42440	GCTGGGGACTAAAGAGATACGACGCCAGTTGATGGACTCTGAATCTATCTTCATAGGTGCAGACCTCTAGAAGGATGCCATTCGCCAAATCCGGATTCGTCTTCATCGGAAATCACGGCCATCCAGTTACGACTTCCTCCTAGGAAAGGGATGCCAGGATACCTGGCATCATCCCGCATGGGGAAACTCCGCCGGCCTGG	003	FastSeqProp (G)	0.724474	0.324437	1.43151
gosai_47182	GCGGGCATTCTACATGAACTGGAGCATACCTGCGTTGGCATCGACGAAGCGGAAGATGTTCTTCCACTTCCGCCCTGGCAAGGAGAATGGAATGCACCCACTCCCCGTTATACTGAAGGTGAGTTCTCGATCTCTGTTCTAGATGGGTTGCTAATTTGTATCTATAGAGCTTGATAGTTTTAGAACTAACGCAAGCCTGG	003	FastSeqProp (G)	0.381867	0.16322	1.47738
gosai_48452	ATCGGGGCTAGACTATCGGGGGAAATTCTGCACCGGCAATTGTCAATACGATATCCAGTGTGTTACTATTGAATTAAGGACTCTAGTAACTCTTGGAGAGGATGCTAGGTATTCATGTAATCGTCCGTCGTCGACGTACGTCAATCCAACTGGTTCAACCGGAAATGAAAATGATGCCAGGCTGGCACCACCTCACCTGG	003	FastSeqProp (G)	0.416691	0.0701868	1.75829
gosai_48894	GCCATGCAGTCGAATGTACCACCTAATGTACCTAGTGCCAGGCTCACTTTAGGCATAGGCCGGAATGTAGCCAACGCAGCCGTTGATTCGATGTCGTCTTGTCCGCCATTGCTCTGGAAGGAATTCTACCGGAAATCTGGAAATCGAACTTCGAGAGTTGGAATCTCGCTCCAAATCAACCTCGATGCACGTGTGCCTGG	003	FastSeqProp (G)	0.362507	0.174112	1.33721
gosai_46419	GCTTGCCCGAAGTAGTCGAAGAACCTGAGGGGAATTCTCAGAGCACTGGTGCGCTAGACGGGAAATACCTTATTCACCCGGCCAGGATTTCTTGCGCCTTCGTGGGAAATTCCCCAAAGAGGAAACTCCCAGAAGATGTTCCTAGCCGTAAAATTGGTTTAAGATAGAGTATTACCGAATCGGGGGTTCCTAAGTGGGTC	003	FastSeqProp (G)	0.568915	0.365848	1.56436
gosai_44658	ATTGTGCCCACGGCGGTTCCCCGGGGGTCTCCGCATGGCCAGAGAGGCTAGGGGACCGGGGAATGGCAGGCGATTGACATCGGAAATTCCCGACTTGGACCGGAAATTCCGTCGGTCCGTATCTAAGGTATTTCTTTAATAAAAATCGAAGTGAATTCGTCGTGGCAATTCACACCGGGGGTCCATTTCGCGAGAGATGC	003	FastSeqProp (G)	0.870607	0.211963	1.70626
gosai_50832	GTCGTTGTCTATTCCCCGTCTAGCTGTGAGTTGTGGCCGCGAGTATGGGTCTCACGCACTACTTCGCCGGAAAGGATGCTCTAGCCTTTTTTATCCGGATGTTCGTATCCCGGATATAATCAGAGATTCTCGACATCATTATGAAACGATGCTACCAATTACCACTCGGGGTCTACAACGCACTGGGTAGTCGAGCCTGG	003	FastSeqProp (G)	0.486462	0.111672	1.81635
gosai_42736	TCTTGGAAGTTGACATATTGGTCTTTTAACAGCTAGCTCTAAGAACTAGGGGAATTCCCCGAATGCGGCTGCATCGGGGAATTCCCAGATGCCAAAGGAGTGCATTGACCCGTACCCTTGGACGATTCGGAGGATACTACTATTATGGGCCCTGGCGCCAATCAAAGATGCCAGGCTGGCACGTGAATCCTTCCCCAAAT	003	FastSeqProp (G)	0.59706	0.204009	1.84873
gosai_42892	ACTCCAACAACTGTGGGTGCCAGGGGTTCGTGGGATATGCGTTGTCGAGACTTCAAGCATCCCTAAAGAACTTCTTGAGGGAGGGATACCAGGATGCCAGTCACCTGGGAATTTCCCGACCGAGACTCATCTCTAAGGAATGCCTGAGAATTGCCAAGTGAACTTATATTGCAACGAGCCTAGCTTCCCTCTACACCTGG	003	FastSeqProp (G)	0.398549	0.103768	1.77038
gosai_50786	AGCATCCACATACAGAGGAAGATTCTTAAGAAAGGAACGTGCCAGCGTACCGCAGACTGTCAGCTAATATCCTCGGGAAAGACTCGAAATAGGCACGAATCGGACGGAAGAATTCTTGAAATATTTCCGGGTTAATTTTAGGATCGGTCAAACATATCACAAAATTCCGCTGTCAAGTAGAGCGGCCAATGCCTGCCTGG	003	FastSeqProp (G)	0.585272	0.249868	1.84749
gosai_45387	TCAGAACGACGAAGACATTCCTGGATGTCAGGAGAAAGAAATCTCGGGATTCTTTTCCTTCGAGAAAGCTACACCGCAAAGTATACTTAGTGTCTTTCGCGTTTAGCATCCCCTGAGACCTCTATACAGCGTCTTAGCGACGACGGCGTTGACGCCTTCGCTCGGGCGAATCGGCAGATATTTTTATGCTAGTAATGAAT	003	FastSeqProp (G)	0.320811	0.16097	1.51363
gosai_46409	GCTCGAGGCTCCTTGAGAATAGCTTCAGGAAGTCTTCCGCGTCCTACTCCATTACATGTCGACGTGGAACCTTTTTACGTCGACCCAGCCATATCAGACGAATGAGTTATACATAGCCGGGAAATCCCATGCCCTGGCATGCCAACTTATTTTATGGAAATAATCATTATTGTGACTTTTTAGAATAACATACTGCCTTG	003	FastSeqProp (G)	0.202777	0.0952882	1.37848
gosai_42816	GGTCTTACCTGTGAACTATGCCCCGTCGAACAATCTCGAAGAGATATGTATGTTAACCTCTATGGGAATTTCCTTGAACGAGCCTCCTAGATTCCTTAAGTCGGAATTACCCGACATGCCTGGCATGTGACGCATCTGACCATGATCCTGTGAGATGCCTGGCAACTGCTAAAGACGTGACAGTACCCTTCTTTAGCTGT	003	FastSeqProp (G)	0.498404	0.220708	1.80554
gosai_50982	TGAAGTTGCTTTATACTGGTTCTGGTACGCCTTACGCGTTCGACTACGAAACGGTCTACTTCTCGGATGTTCGACTGGCACGGAACACATGGTTCGATCATGTCCGGACTAGTTACAGAACATGCCATCGTGACCTAAATACCAATAAATGTGGAGAAATAATAGCAAGCCTACTGCAATGAATGCTATCTGTTGGGCAT	003	FastSeqProp (G)	0.292515	0.121016	1.67984
gosai_48479	ACAGATGCACTGCGTAGGCATCCTTTCCAACAAGGATGCCAGCCATTTACGCGATTGGATGGCCCGGATATCGTTTTCCGTTTCGAAGAAATCGAAATCGCAACCATAAGATGGATGCCATGCCAGGCTATCTGGCATCACATAAATTCTGCCCCGCCCCGTTACATTCGACCACACTCTCTGATAGTTGACCGTGGTAC	003	FastSeqProp (G)	0.181391	0.000572267	1.48893
gosai_42912	GCTCGGACCTGCGCTCTCGAGGTGCACCGGCTACGACGGATGCTCTCCGCGAGCATCCGCCCCAGGGGCACATTGATGCGGAGATCCGGTTATTTGGCCCGCACATGCAAGGTGCTAAGTAGTTCCTTTGTTGCATTAGGGCAATTCCCCAATTCGGGAAATTCCCCAGTCGCCTGGCATCAAATTCTTAAGATATGAAT	003	FastSeqProp (G)	-0.0806933	-0.194651	0.543035
gosai_44270	GGTTGTGGGTCTGATGAACGGGACAAATGCTTAGGGGCGAATGCTCGACGTGCTACTTAACATCCTGGATTTAGGATGTCGAAAAGCCGGAATGCGTAAGTTACATCGGAAATTCCCGAATTCCCGGATGCCAATCACTGCATTAAATTTCTGGTTATTAAGTTATGCGGCGAGCATCTCCTACTAGTATGGCGCGGTAC	003	FastSeqProp (G)	0.0927508	-0.0384729	1.45958
gosai_50248	ACTCTCATTCTACTGCCATTCACTTCCAGCGCCGGCACAATGCTCGAGTGCAAAACCGAAAATCTCAATTTCTCTAAAAACCGGATTCGACGTCTGGGATTTCCCGTTTCCGACATCGGAAATTCCAATTTCCGAAGGATCAGTCTATATCGTTACCCTCCACCAACTTCGCCAACATAATTGTGAGTGCAGTCTAGGAC	003	FastSeqProp (G)	0.53571	0.429601	1.41622
gosai_50979	TTAGACCGAAGTTGCTAGCCGGATCGGACGGGTCCCGCGTACTTCCATCATGGTCAAGACTTTCGCCGAGATTCTTCGCAACCGGAGGCAGTTCCTTTGATGCCCCGGAAGTTATCGGCCAAATCACGGACAGTATAAACTGTAGTATAAGTTGGCACAGCACATCACTCAAGCTTTAAAGAGGGGTAGGCGCCGCGTAC	003	FastSeqProp (G)	0.826051	0.416294	1.6082
gosai_44701	GATACACTGTTGGACTGCGATCCCGCCTGCTTTGCGTCTAGACGTCAAGAGAAGGGCCCCGATGGCCTCGTGTGACGATGTCTTGCTTGTGTTCTAGTTAAAAAACACGTTACGATAGTCGGAAATTCCTTAATTCCTAGGTCATGAGGTAATTCCCATTAAAACTTAATGTCGAATTTTGGAGTAAATCACGGCCGCTG	003	FastSeqProp (G)	0.536272	0.155977	1.06133
gosai_47200	TCTATTTTTACACGCGTCTTGATGCGACCCTAGATCGCGACCTCGTGTCAGTAGCGCCGTCGCCAAGTGGTCGTGCCAGGCTAGCCTGGCACCGCCCTCGATTAGGCGTCGGCACGCCACTTACGTATGAATCGTACGTTTAAAACTCTTAATCTATTCCAATGACCGAACGCATATATTCACCGAGCATAGTAGCCTGG	003	FastSeqProp (G)	0.430041	0.299873	1.58424
gosai_50013	GCGAGTAGCAGGTGGCAACATGCCCGCCGGCGGGAAAGCCCGAGTATCGCAGTCGTTGGAACGATCGAATAAGTAATCCTGATTTTCTTAAAGTCTTGGAAGATTACGCCACCTCGGAAATTCCCCAAATTCCTAAGAATTTTGGGCTTTCCCAAGCCCGTGCGGTGGCCCCGCATATAATTGTCCGGCTTAGACCCTGG	003	FastSeqProp (G)	0.291726	0.209334	1.41832
gosai_48488	TCTGAGACCCCGGCATCCGTTGAAACGGGAAGGAGGGGATGGCGACGCTACGACGTTACACTAACGTAAGTTTCGGGAGACGTTTACGTATACGCAATCCCTGCGATGGAGGATGCCAGGATGTGGGCATGCTTAGGAGTATTCTTCCCGATGACTTAGATTAGTCTTCCGTTGAGACCCCGAAGCATAATCTTGGGTTC	003	FastSeqProp (G)	0.200456	0.0967094	1.52063
gosai_42176	TCAGCGGCTCAGATTCTGAACGCAAGCCGGGGTTGCGATTCGGGGAATTTCCCAAAACGCATAAGCAAACGGACCCTGAGAGTGCCCCGAAGGATGCCAGTAATTCGGGAAATCCCCGAAAGCGAATCAGCCTCCTATCTTTTATTTGGCATCCTGGCATACACATCAATGTGACATCCTGGGCTGGGATTGAATGGACT	003	FastSeqProp (G)	0.155789	-0.0160078	1.54751
gosai_50460	GCTGTCGTTCCCGCCGAGTCGACCTCCGTTTTCTCTGTCAACGGACTAGCGACGAGCGTTGTAGGATACCTGCTCCGACGATTAATCGTTAGGGGGGGAAATCGAGTTTCATTCGAATGCTTTGATTACATCCTTGAGGCTGAAGACGTACGAAGTGATGTAATTCGATAGGAATTTAATTATATTCCTTCTTAATGAAT	003	FastSeqProp (G)	0.309259	0.212968	1.51964
gosai_42241	TCTTCACAATGGAAACGAGCGAAGAAATCCAAACCGGTGCATCAAGGACGCCCGGATATCCGTCTACCGACTCGGATGCAATCCGTAAAATGATGCCAAGGAGCCTGGCATCCTATAGTATGCTGTGAGTCCACTAATGCTATTTTTAGAAATTCCTTGTTAGTGTCGGCCCTCCCTCCTAGTGGTGTTAGCATTGGTAC	003	FastSeqProp (G)	0.235721	0.1227	1.56037
gosai_48576	GGCCGGCACCCGTATGTAACAAACCAAGAGTACCATTCGCTGGGCATCTCTACCATCTTCCTGGCTCTCTACGTCGGATGTACGCAGACTACGTCTTTACGTAATCCGAATTCCATTCCCCGGATTTGATACCGATAATGAAAATTGATTAGAAGACAATATCATGGGAATACCTAGTAACATCCCCAGGTGCTGGGGAC	003	FastSeqProp (G)	-0.237057	-0.270141	0.649636
gosai_42054	CCTCCTTAAGGAATCTGGAATTCGGGGGAAATTCCCTCCACGCGCAATCCGTGATTCATCACAGAGCTTGATCAAGAACCGCTTATTTCCACGTGCCTCTCGCGTCTCCAAGGGTGCCTCGGAAATCATACTTCTAATTCCAGACTTAGTGCCCGAAGACCCATGTGGTCCATTTTGAATAGAATCACAGTCCTTGGTAC	003	FastSeqProp (G)	-0.0962251	-0.205702	0.814931
gosai_48863	GCTTAAGTGTTTTTCACCGACTCCACCGCCCCCCGCGTATCGTCCCGGGCCGCCAGACTTTTAATTGATCGATTTCGTGTGCCCAGATTACGCCGTTGGCATGTCCGGAAATGAATGCCAATTCCGGACATCATTATTACCGGTATAAAAATCGAAATCGAATCCAATCGAATCCAGATCCATAGGTTCGCTCTAGAGAA	003	FastSeqProp (G)	0.280063	0.193237	1.56132
gosai_44559	TCAATGGCTAATCTATCAGTCGTAATGAATTCGGGGAATTTCCCCAAAACCGACAGACGAAATTCCGATTGCAAATCCTTCCACGGAATTTCGTCGGCTGGCACTGCATTGCCAATGCGGTAGACGCACTTCAGCGGTGCAGCATGGCCCTGGATCATGTCTACACAAGCCGTGCTGAATGGGAATTTGACTCAAGAAAT	003	FastSeqProp (G)	0.268582	0.0921076	1.66718
gosai_43568	TATACCGCTTGGCATCATCCACCTGGCATCCTTGAAATATCCATAGCGGATGCCACTCGTAGATTACGTATGGCAAGTACATCCTTGGTCATCAATAAGGGATGTGGATTTCGGGGAAATCCCCTAACATGCCTGGCATGCGCATCTGAGAGATAGCTTGATTATGCATTACCCGCTATAAGCTGTGCCCACTAAGGTAC	003	FastSeqProp (G)	-0.322261	-0.294537	0.474106
gosai_48067	TAGCATCCTTAAAGATGCCATCCTGTCGGAACGGAAGATGCTTAAGTTGGCAAGCATTTCCGCGGAGATGCCAACGGAATCGAGACTACGAGTCAAATAATTCTTTTACAGTTCCTAAAGGTTTAATCGGGGTATGTTTCGACTTATCACCGGGGCGGGCCTGGCATACTTACCGTTTACCTCATTCGCTCCATGGGTAC	003	FastSeqProp (G)	-0.182154	-0.135107	0.510918
gosai_50189	ATACGGACTCCAGGGCATCTTAACGTAACTCGTTGCCGGCCAAGGTAAGGGCGTAAAACTTTCTATCGCAGATATCCTCATTTCAGCCCTGTGGAACGTTATGTTAGGCGGAAATTCCGCGACGTCCCGGAAATTCCCTAAGTTGGCACCCAAATTACCTTCAGATGGTAATCGTGAAATTAGGGTGAAGTGTCCGAAAT	003	FastSeqProp (G)	0.391286	0.271475	1.3423
gosai_45666	TCGGGGGCGTCGAAACTCGGCATTCATCGAAGGATAAATCTCTGCAAGCGACGAGACGACGAAGACGTCGCGACGTTACGTCTCTTGCGTAAACTAGTACATAGTTGATGCCAGTCACTGCGCCAATAGTTAAATTTAATCCAATTGTGTCTATCTCACCATTAATAGATACTGTGCCACAAAGCATTATTCCAGGGTAC	003	FastSeqProp (G)	0.0709384	-0.102275	1.28724
gosai_48654	ACGTTCCCTAAGGACTGGCGTTAAGCTATTACGCACCCCAGAGAGTGATGGAAGACCCAAATCAAGACGCCGGAATCCAGACGGAAATCAGTTTCGATTTCCGTTATCAGTCCGGAGCAAAATAAGATTTGATTATAAAAACCATATCCTCAGTAATGCAACCTGCTTTCGATGGTACCGTGACCGATAGTCGTGGGTAC	003	FastSeqProp (G)	0.4199	0.0678386	1.83973
gosai_45254	ACTAACCTTAAGCCCCGCCGTCCAACTGGAAATCCGTATAGTACCCCCCGGGCGTGCCAGGGGTCGCGACGTGAATCATTGACTCTTACGCCATCTTGAAGACGTTGGCCGGAAACTTGGCATGCCCAGATTGGCACAAATAAATGGATGACCCGATACCACGAAATGATAAATGTGCCCTGTCGGTATAAGTTGAATTG	003	FastSeqProp (G)	0.0492511	-0.195498	0.938626
gosai_44723	CCTTGTTTTATAAACTATATGACGATTCCGCGTGGCTTATGACTAGATTTGGTAGACTTGATTCGACGGAGACGGAAATTCCCGACTCCTTAGACGCCCTTTGGGTACAACTTAGATGGAATTTCCTCCGAATCGAGGCGAGGTTTACATGGCAGTAGCCGGGCACTGCCAGTCTCTATACTTCTAGAAGATTCGTTGAC	003	FastSeqProp (G)	0.025641	-0.0413504	1.15399
gosai_43370	TCTCCGCAATCTTAGATCGACTGCTCGTAGCCTTGACGCTGGGACAACTGCCTCGTGGAAGGAGGATGCTCAACGACGTTGAACACGCCGTAAGAAGCCTGAATCTTACGCAATTAAACCTCGACTTCCGACGGAAATCTCAGCATATGGCTAATGCGAATCTGCGGTGAGGATGCTTGGTGTGGCCCGTACTTAGGAAT	003	FastSeqProp (G)	0.447312	-0.00717514	1.87714
gosai_48382	TCCAGTGAGATGGCATCTACTGAGTCAATAAACGGCCGTCACAAGTAAACCGTATACCCGGATGCGGTTTTGCCTGGATGCCCAAGTTGGCATCCGGGTCTGGCACGGATGTAATCGGAAAATGGCATTGACTAGGCAAAGAAACTAGTTGGCATACGATTCACTATACGGCATTAGATTCGTGCGCATATTAATACTTC	003	FastSeqProp (G)	-0.156048	-0.283491	1.00072
gosai_43711	GCGGTGGTACCTCACTAAGGTTTCATATGTCCTTCGACAGTAATGCCTCATCCTGGCATGAGTCAGGATGCCAAGTCAGCATCTGTTCCGTACCCGGATGTAGATTATGATGCATGATGCCAGGCTACTTGATATAATTCTAGTAGCAACTTACAGACTATACAGGGGATAGTAAGTGTTGGTGTAATGTGGTAGCCTGG	003	FastSeqProp (G)	-0.164373	-0.0972364	0.544723
gosai_50022	AAACTCACCTCGTGGTTCAAACGACGTTATTCGGATGCCGCAAAGCTGAGATGCCCCCATTGCATGGCGTCTTAAGATACTTGGCAAGAATGGAATACTCGGGAAATTCCATCACTTTACATCGGATATTCCCGTGATTCCAAAATAGCCAGCACTCGGTTTGCTTACGTTATTTGTGTCATGTACAGTAAATGGGCGAC	003	FastSeqProp (G)	-0.095751	-0.100744	0.622946
gosai_43705	CCAGGGCATCGAGAGATTTAGCATCCTTCACCTGGGATCTTGCATCCTTGTACTGTATCTGGCTACGTAAGCCAGACGGGAAATTCCTTGGAGTTTCCTCAACCGCATAAGTCAGCTTTGATGGAATGATACCAGGCAAGAAGCTATCTGTCGCAGAGCATCCCTATGTCATGTAGATCAAGGGCTACCGGCCTGGGTGC	003	FastSeqProp (G)	-0.0808554	-0.10891	0.433785
gosai_42947	TACAGCATCAGGATCCACGCCATGCGGGCGTCGGGGAAATTCCCTTAAACGAATCTGGAGATTCCTTACCGAGTTCCAGGATTACTGACTTTTGGGAATTTCCCGAAGGATGCGATAGGTTCCAAACGAATATGATCTGCTATAATAACCCCCTGCAGTCTCGTGGATGGGTAAGAACACGTGCAGGGCATCCTTGGTAC	003	FastSeqProp (G)	-0.15527	-0.062119	0.492967
gosai_44867	ACTTGTGGAGATGCAGGCGAGGTTGAATAGCAACGCTCACTTGATGTGGAAGAATCGAGAATAAATCTGTTCGTCCTTGCCGGAAATAGTACTTCGTCACGACGTCGTATATGGATTTGATTCAATTAGAACCGAATGATAGTCAACTGGCTTAGGCGGATTCGTGCGCGAGTCTGGCCCTACGGAGTGCTATATACTAC	003	FastSeqProp (G)	0.0613329	0.0809509	1.47008
gosai_50136	CTCGAAGAAATTGGCTGTTTTTGCTCCGCGTTTCTTCTAGGCATGGGGTCTACCGTTATAAAATGTCGGAAATTCCCAAGATGTCCGGTCGTCGGAACTCCCATATGATTCCCCATACAATAAGAGAATGTCGGAAATTCCCAAAAAATTCCTTCCGCGATGATTGATTGGGGGGCCCAACTAGTGCCTCTGTTGTGGAC	003	FastSeqProp (G)	0.497317	0.304761	1.15349
gosai_48084	GGAGCATCCTTGGCCCGCATCCTTCTCCAAGGTTGCAGGTAGAACGTCCGAAGGAGGGGATGCCCGTATGCAACATTCCTGTCAGATGCGTAATCCCCCTGGCATCATCCGCCTGGCATGCAATCACTGATAAGGTATTAATCACGGGTTTCGCCATCTAAAAGGCACTTAGAAGTAATTAAGTGATTTAATTCACAAAT	003	FastSeqProp (G)	-0.153243	-0.348946	1.05036
gosai_46100	GTCCCTGCTCAACCATAGGTCGCCCTGGGCGTAGTCTGGAGCATCCTTCTGCGTCTTTTTGTAGACGGATGCAGTGGAAGAGACTTCGACATCTCTGAAGAATTCGGGAAATTCCCAACATGCATTCATCCCAGAATGAGTTCCTGATGCACTGTGTTTTAAAAACCTTTGGGCCCCGGATTAGGATCAGTGTCGCCTGG	003	FastSeqProp (G)	0.114549	0.00328607	1.3403
gosai_44712	TAAGACGGAATTTGCAAGTGTATAGAATCTAGGGGAGACGCTCTGCAATTGGAATTTCCCGATTTGGCTTGACATAGGCAATCGCGGAAATTCCCAGAATTTCCGTGGCCCGAGTGGTTTGCCCTCCTTGCCTGGCACGCTATGCCAACTTCGTGTCACATGGCGCCTGAGGTGCTTATCCTCGAGGGGGTATTGAGGGC	003	FastSeqProp (G)	0.0127858	-0.111662	0.938035
gosai_43322	GTTCCCACCGATCGACGCATCACTGCGCCCGATGCACCAGAAGATGCGCATCATCTAAGGAATCTCTGCATCCGAGATGTAATCCGGATACCATAATAAGACACGCCGTCACGAATCACAGTGGGGGATGTACGCCCGCATCGGTCATGCTCTACCCTTTTTACTATCCCCGAATTTTCAGCCACCTCCTGGTGGGGTAC	003	FastSeqProp (G)	-0.204568	-0.215909	0.702973
gosai_50466	ACATCCCTGCCTCTTCGGAATGCCAGCCACGTCGAGCCTACGTTACTCCAAAGTATAGGTACTCGACGCAGGCTAACCGATAGTATGCGTTACCGGGGTGCGTTGCGTCGGAAATGGATTCGGGATGCCGGAAATAGAATCTATTATTACTACTAAAATTAGTTTCGGATACGATAATATTACAGTGTTATCGGACAAAT	003	FastSeqProp (G)	0.37207	0.306491	1.3658
gosai_47741	TTGCGTCGAGCTTATTGATTCGCATTCTATAGTCACCTCATAAGGACGATCGGAGATCACATCCCTCTGGCATGAGATGCCATGGCATGCCCGGATACTTAAGTCATATGTGACGACTCATCGAAAATTAAGTAGTCGGGAAATTCCACAGAATCACTGTGATCAAGAGCCTGGCACCCTACATGCAAGGGTGCACCCGG	003	FastSeqProp (G)	0.187063	0.136243	1.27316
gosai_44892	TCTAAGGGGAGGCTATAGCAGTCAACAGATACTGCTCGAACATCTCGGAAGACAACGATGGATCGTGCACATGGAAGGGCAGACTTATGTTGTCTCGTCGGCGTCCACTGTCCTGCACGCCTACATCGAAAGGAAGAAGATCCAAATCTCTGGTTTCGATTCTCAGTTCTTCAAGCCTGGTGGTGCTATTAGGAAAAAAT	003	FastSeqProp (G)	0.0129403	-0.0679867	0.747832
gosai_44502	ACGCGGCACCTGCGTTACTAGGCATCACTAACGGGCTAAGCAGGAGCATTTGCACGTCGGAAATTCCCGAGGCGCACGGGGAATTTCCGCATAGAAGGATACGACGAATCTGGAAATAGCCGGAGATTTCGTTCCATCTCATAGCGATTCGGCTAACGTTCCCTGAACTGTCCCTCGGAGCTATTCATATCTCTGGAAAT	003	FastSeqProp (G)	0.491611	0.36598	1.69057
gosai_48351	CACAACCCGACACGACTCCCTCTTATAGTAGTGGGTAGATACTCGGCGTCCGAGCATCGTCTTCGGAGCGGGAATAGGATGCACATCTTGGATACCCAGTTTCCGTTCCCACCAAAACGGAAATGGAATTCGATTCTAGCATCCGCTTTAAATTTATATATTTAAAACTCGATATGTGTTTGGGTAGACCCCATTGGTAC	003	FastSeqProp (G)	-0.199882	-0.232896	0.951988
gosai_44485	ATAGACGCAGCTCAACCGATCATGCCGTCGTAGGGAACAATGAGGAGTGGGAATGCTGCATCGTCTTTGCGTGAATGCCAGAATGCCTGGCATCATCCTAGGATGACATTCGTATCGTCTGACGTATGCATCATCCCACCGCGGAAATCACAGCATCCTTACAGTCACCTTCTGCCTCGCAGATTGTATTTCTAAGAAAT	003	FastSeqProp (G)	-0.189238	-0.26623	0.959172
gosai_43841	GCGGGGAGAAAGTATTACAAGCCTGCTCGAGCTAGCTAGGCGACCAACGGTGCAGACGAGGATGCTGCTGGAGTCGCAAGATGGCATCATATCTGCATCATGGCACCACGCATCCCGATACCTCGGAAATTCCCATTGCATCAGTCTGGAATCATGCTTAGATTTTTAGTATTTGGGTATGGCTACAAAAACTGGCTTCG	003	FastSeqProp (G)	0.118689	-0.205384	1.41199
gosai_50016	TCTGCGAATGCTAAATTGCGTTCGATGGTGCTGTGGGCAAGCATACCAATGGGAATTACGTCGGACGCGGTTTCGGCAATCCGGGAATTTCCCGAATTCCGACGTTGGAAGTGACAGTAATTTCCTACGAACACGGCCATCCAAGTGGGGTTTATCGACTTATAAGGCGTTTCTTTGAGATTTGGCGCCCGACCTGGTAC	003	FastSeqProp (G)	0.348202	0.337795	1.51782
gosai_47103	GTTGATCGAGCCCCTGAAGGAACGTTTCTATGAGTAAGGATCTAACAATAGATCCGCCTCCTTGGGTCTTACCCTGGCATGCCAGGTAATGCCCTGGCATGCCAGACGCAATTAAAACGGTCAATACCTGACTGTAGCAAAGAATTATCAGCTTTGATCAAACGGTGGTGACTCCGTGGTGAAAGAGCAGGCTAGAGTAC	003	FastSeqProp (G)	0.119274	-0.282238	0.423514
gosai_48461	GCAGATGCTCTAACATCTAGGCATCCTCAAGACCGACGACTGGCAATTGGATTCGATTTGTGCATCCGTGATTACGTACGTCCGTACGTAATAGCATCTTGAGATGCAATAAATCCAATTCGCCACCAGAAAAGGATGCTTGTGGGCAGGATGCTGGATAAAACGACCCAGTCAGGACGACAATTCCAACAACTGAAGAA	003	FastSeqProp (G)	-0.328807	-0.210853	0.620526
gosai_48276	AGATTCCGTTCTTGACACCTAGTCGAAACCGGACTTCTACGTCGCCCGCTTAGCAAGGTAGCTCCGACTATCCCAGTGCCCAGTGGGATGTAATAAACCTCAGGCCGCTCTTGGAAGATGCCCTGGCATGCCCTGGGGGAAGGAAGTAATCATGACTTATGCTTCCAATCTTGGTTTTAACGGTTTTTCTCACAACCTGG	003	FastSeqProp (G)	0.216702	-0.20437	1.54065
gosai_44900	TCTAAGCCGCTGAAGGGAGTGTTTTTACAGTACCGTAGAAGTAGTTCTGCCAAGTGGGGCTCGACCTGAAATCCCCAGGGGACAATGCCTACCTTTGAACTCAGAAGACGAGGCCGGCTAACCAAACTTCTAAGACGTCGGCGACGTATCTTACGTATTACTTATTCGACGGAAGAAATTCTTCGTGAATCAGAAAAAAT	003	FastSeqProp (G)	0.0526338	0.0109017	1.40298
gosai_46506	ACACCACATGCCACCCCTTAGTACCCATCTTGCACCAGTTAGCGGGTCTTCGACGGAAGAAGACGTCATCCGTTACGTCCTTGAAGTGCCAAGATGGCACAATCTAGGTTGGCCCAGCTCCGACGTTGTATACAACCAAGCTAATAATTCTTCATATAAGTTTCACTTTGGTCTAACGATGACCATTTTGGGGCGCGAAT	003	FastSeqProp (G)	0.0185737	-0.0323549	0.74487
gosai_48605	TTGCCGCCAAGTAACCCTCGTGCACCCGGTCTCCGTCTGCCATTTGGCTTTCATGTTCCGAGACGGGGGCAAATGCGAAGTCTCCATCATGATACCGGAAATAGAATCCAGATTCCATAAAAATTTCTTCGGCGTTCACATTTCCTCCACCTGTAGAACTTTCCCAGACTCCTGGCAGAGAATCCATGGATGTGGTGGAC	003	FastSeqProp (G)	0.366279	0.163447	1.12692
gosai_49400	CTTTATGAATGTATCGCAGCCATTCGCGCAGGATGCTCCATCCCTAAGGAATGATGTAATCGGGATTTCCCAAATGAATCCGGGATTCCACTATGCAGGATGCTGGAAATGGTCATCCGCCTCAGCCCGTCGATATTTCATCCACCAGTGAAAAAATTGATCTTGAGTCTCCTCATTTCTTCTCCGAACCTAACGGGTAG	003	FastSeqProp (G)	0.167774	0.115011	1.56151
gosai_43169	CTTGTCAGACATGAGTGTTAGCTCTAGCAGAGTGGCATCACTCGACTGAGGATGCCCCTCTGAAGCCTGGCATCGTCGATTCCTTGGAGATGACGCCACTTGTCCTGGTATGGCAGATTAAATTATTCGGGAATTCCCCGAATACGAATCTAGGATTATTCAACCCCACTTCTAGCAGCGAACGCGAATCTCTCTGAAAC	003	FastSeqProp (G)	-0.185041	-0.175901	0.892752
gosai_44066	GGAATCCCCCAGATTCCAAAAGAATGAGTATTCGGGGAATTCCCCAAATCTCTAGCATCCTGGGACCACGGTGTGCATCCTTCACTTACGCCGACCTTAAGTTGAGGGATGCTGTCGCTGCATCATTACCCACTGCGACACAATTTTTATTTGACCCACTGTGGATGCATGCATTAGGGATCGGTTAGTAAACCTGGTAC	003	FastSeqProp (G)	-0.396491	-0.241907	0.470426
gosai_50242	ATCATTATGCTCGTATATTTTTTCCTCTGGGGATTTCAGCATAGCAGCGTATTTGATGGAATTCCATCTAATTTTTTTCGACGTCAGCCCGGAAAACCGTAACATCGGAAATTCCCCTAAATTCCATATATTTTTTTTACCCTAATGCAAAATTTCATTATTGGACAGATTCGGCTCGTGTACTATGGAGTGTTCGGTAC	003	FastSeqProp (G)	0.789686	0.614318	1.54575
gosai_44705	TCTCTGTTTGGCTCAAGATGCCTCTGGAGCCCGGGGAGCAGCGAAAACCATTCACGCGTCGAGCTGTTTGGGTAAATCTGGGAAATTCCCGACGACTGAATCACAAGATTCCCTGAGAAATGCGATGTTTTCGAATCGAATTAATTGCAATTTAGGATAATATAAAAAAATGTCCTTTCCATCGACGGGTAAACACAAAT	003	FastSeqProp (G)	0.219693	-0.00353411	1.17637
enh_666812	TAGTAAAAATAAACATAAGAGACCAAAATTCAAAGCATGCTTTGTACTCAATGTGTACTGCTTTCACACACTATAAAGTCCAAAAATCATTAGCCAAACGATCATAAGTCAGGGTCCATCTGTATGAGAATGATTAACTCATATCCCAGTAGCAAACACCTTAACAACTAGAGTGCAATGCTTATATAAAATTACTTTTG	300	Test Set	6.183	0.0813065	-0.047442
enh_666811	TAGTAAAAATAAACATAAGAGACCAAAATTCAAAGCATGCTTTGTACTCAATGTGTACTGCTTTCACACACTATAAAGTCCAAAAATCATTAGCCAAACCATCATAAGTCAGGGTCCATCTGTATGAGAATGATTAACTCATATCCCAGTAGCAAACACCTTAACAACTAGAGTGCAATGCTTATATAAAATTACTTTTG	300	Test Set	5.8402	0.0824642	-0.276353
enh_719832	CTAGGAGTTCAAGGTCACAGTGAGCTTATGATCACATCAACGTACTCCAGCCTGGGTGACAGAGCAAGACCTTGTGTCTTTAAAAAAAAAAAAAAAATGTGGAGTCTAGTTAATGTGTAACATCTCAACACAGAAGTCAGAAAGCAATGGTCATGCACCAAAGAAAAAACAATCATGTTACATGAGTCCTCTTTCAGGGC	300	Test Set	5.67557	0.532515	0.069159
enh_348778	TTAGTGTGGACTATTAAAACCCTTGCACTGTAAGGCTTAAGGTGACTTTTGTATTTTTTCCATTCCAAGACTGAATCCCATCATACTTAAAAGCAGGCAGGCAAAGTCCGAGGTGAGAGTTAATCATTTGCCACACAACATAACAGTGACTAGTGGAAAGCTGCAGGGAAGAGAATATTTCTGGAAACCAGCAACACCTG	300	Test Set	5.60341	-0.0768701	-0.225519
enh_719831	CTAGGAGTTCAAGGTCACAGTGAGCTTATGATCACATCAACGTACTCCAGCCTGGGTGACAGAGCAAGACCTTGTGTCTTTAAAAAAAAAAAAAAAATGGGGAGTCTAGTTAATGTGTAACATCTCAACACAGAAGTCAGAAAGCAATGGTCATGCACCAAAGAAAAAACAATCATGTTACATGAGTCCTCTTTCAGGGC	300	Test Set	5.49257	0.550753	0.0754733
enh_348779	TTAGTGTGGACTATTAAAACCCTTGCACTGTAAGGCTTAAGGTGACTTTTGTATTTTTTCCATTCCAAGACTGAATCCCATCATACTTAAAAGCAGGCATGCAAAGTCCGAGGTGAGAGTTAATCATTTGCCACACAACATAACAGTGACTAGTGGAAAGCTGCAGGGAAGAGAATATTTCTGGAAACCAGCAACACCTG	300	Test Set	5.1349	-0.0360789	-0.288599
enh_595833	GTTCAGTGCATTCCTGCCCAAGGGGCGATGGAGCTGGGGTATTTATACACCACCACCCCTGCCCCGACAACCTCCTGACAACCTTTAGTGAACAGCTGCTCCCTGAGAAAGGGCTGGGCCTTGATTCCCTGGCACTCTGACCTTTTGAGCACAGCAGAGTGGGGACAGTTTCGAGCAGAGCTGCAGGTGGGAGCTGGGCC	300	Test Set	4.74633	-0.265576	-0.302547
enh_498494	AATGACCTGTGTCTTCTCAAGGGCCCCCTGGGTCAGGCATCAAGGGGTCACGGCAGCGCAGAGTGGAGGAGCAGGGCCAAGCCCTGTAAACACTGGAGTTATTAAGCCAGTGTGCATGTCGTTAAATTTTAACTAAGGGGGGACAGGGCAGGAGGCCCTGGGTTGCCTTCCCTGGGGCGCAGTAGGCTTGGATGTGGGGG	300	Test Set	4.17678	0.404605	0.333291
enh_418641	CAGACCCTGGCCAACACTGGTCAAAGCACAGAATGCTGGGCCACCCACATTACCACTGCCACCACGGTCAAGTGGCAGAGTTCACTAAAATGACCTGTGACCCATCCAGAGACAAAGTAAACACGGGCTGGGAACCATCTGAAAAGTCAACAACAAGTCTCAAACCTCTGGACTCGGGGCAAGCTCATTTCCTTAGGTCC	300	Test Set	3.89162	0.138315	-0.434441
enh_418653	CAGACCCTGGCCAACACTGGTCAAAGCACAGAATGCTGGGCCACCCACATTACCACTGCCACCAGGGTCAAGTGGCAGAGTTCACTAAAATGACCTGTGACCCATCCAGAGACAAAGTAAACACGGGCTGGGAACCATCTGAAAAGTCAACAACAAGTCTCAAACCTCTGGACTCGGGGCAAGCTCATTTCCTTAGGTCC	300	Test Set	3.86958	0.192733	-0.537287
enh_763619	GCACACAGCATCCCTGCCCTGGGCCCGCTGGTTGCCAGTAGTAACCCCAGTTGTGACAACGAAAAATGTGTCCAGACCTTGCCTGATGTCCCCTGGGGGACAGTCACCCTGGGGGACGGCTGCTGGTGAGCGCTCACAGATGTGTGTCCATAGCAGCTGACTCTCCTTTGCATCTCCTCCCCGAGGACGCAGTGGCAGGC	300	Test Set	3.65784	0.374142	-0.207752
enh_440834	ATTTTTGTTTTTGTTTGTTTTTTGAGATAAGTTTCTTCTATGTGCCCAGGCTGGAGTGCAGTGGTGCAATCATAGCTCGGTGTAACCTTGAACTCTTGGACTCGAGTGATCCTCCCACCTCGGCCACCCAGTTAGCTAAGACTACAGGCATGCACCACCACACCAAGCTAATTTTTTTAAAAAATATATTTTTTAGAAAA	300	Test Set	3.2835	0.138219	0.276439
enh_744050	GCGAGGTGTTGTCAGATCCTCCAAGTCAGTAGGTCAGAGGCTCAGTAGCAATTGATGGTACAATGAAAAAGGAAGCCTTGGGCTTGGACCCAAGCGTGTTTAGTGGGTAACAGTTATTTACAGGAAGAGGTGGCAGTGTGGCCCCACATCTGCTTTGCACTGATATTTCTCCCTTAGCAGATAAGCATTCTGGTCTGGTT	030	Test Set	-0.117608	5.48693	0.16185
enh_744049	GCGAGGTGTTGTCAGATCCTCCAAGTCAGTAGGTCAGAGGCTCAGTAGCAATTGATGGTACAATGAAAAAGGAAGCCTTGGGCTTGGACCCAAGCGTGTCTAGTGGGTAACAGTTATTTACAGGAAGAGGTGGCAGTGTGGCCCCACATCTGCTTTGCACTGATATTTCTCCCTTAGCAGATAAGCATTCTGGTCTGGTT	030	Test Set	-0.101313	5.40182	0.266805
enh_173119	TGAATAATTTTGTGGGCTGACAGGGAACAGGAGCCTGCTACTCAGGGAGGAGCAGGAGCTGCGTTTGGTCCCTGTGATAAGGAGGGTTGTTTTGCTAGAAGACCTTGTCAATGGAGCAGAGTGGGGAGGGCAACTTTTCATTAGGCTGTTCAAGGCCTTTTCAATTTTATCAGATGTTAAGGAACCACATAATATTGAAC	030	Test Set	-0.203477	4.93503	0.29382
enh_335209	GGTAGGAGTTGTGGCGTTAGATAGGCTTGTCTCTGAAGCCCAGCTCCACCCTTTACTAGCTATGTGGCCTCAAACTAATTAATCACTCAGTGTCTCAGTTTTCTTATCATAAAACATGACAAATAATGTCTATTATGCAGATTACATAAGACAACAAATATAAAAGAGTGGGTGTTTCATATTTATAATTATTGGACACC	030	Test Set	-0.48218	4.93013	-0.720617
enh_173120	TGAATAATTTTGTGGGCTGACAGGGAACAGGAGCCTGCTACTCAGGGAGGAGCAGGAGCTGCGTTTGGTCCCTGTGATAAGGAGGGTTGTTTTGCTAGAGGACCTTGTCAATGGAGCAGAGTGGGGAGGGCAACTTTTCATTAGGCTGTTCAAGGCCTTTTCAATTTTATCAGATGTTAAGGAACCACATAATATTGAAC	030	Test Set	-0.228839	4.87749	0.348818
enh_281562	GAAAGGTTATCAGCGGCTCCAGATGGACGCCCGTAGGCAGGGTCAGTTTAGGAAGACCGGCAGGCAGGCGTATTAGGCGCGCGGGCTCCCATCCTCATGACTATGGGAAGCAAGTTTCCCTCATCCCTTCTTGGAAGGTAAGAGCTTTGACATCTGGAAGTGTCAGAAATGAGCCTTTTGCCATAAATCATCCTGAAAAG	030	Test Set	-0.837989	4.80716	-0.422527
enh_335208	GGTAGGAGTTGTGGCGTTAGATAGGCTTGTCTCTGAAGCCCAGCTCCACCCTTTACTAGCTATGTGGCCTCAAACTAATTAATCACTCAGTGTCTCAGTTTTCTTATCATAAAACATGACAAATAATGTCTATTATGCAGATTACATAACACAACAAATATAAAAGAGTGGGTGTTTCATATTTATAATTATTGGACACC	030	Test Set	-0.440222	4.76871	-0.695758
enh_281580	GAAAGGTTATCAGCGGCTCCAGATGGACGCCCGTAGGCAGGGTCAGTTTAGGAAGACCGGCAGGCAGGCGTATTAGGCGCGCGGGCTCCCATCCTCATGGCTATGGGAAGCAAGTTTCCCTCATCCCTTCTTGGAAGGTAAGAGCTTTGACATCTGGAAGTGTCAGAAATGAGCCTTTTGCCATAAATCATCCTGAAAAG	030	Test Set	-0.775331	4.76832	-0.489393
enh_789966	GTTTTGAAAAAGTTACCCTTCTAGAACAGTTTAAAGAGTTCAGTGAGCGCCTTTATCTAGGCTCCCCAGATGTTGATATTTTGCCACATTTGCATGCTCTCTCCTCTCCATCTTTACACAGACACACACTCTTTTTTATTGAAACTTTTAGGAATCTTAAATACTTCAGCCTGTATCTCCTAAGAAAAAGGGCATTCTTC	030	Test Set	-0.18416	4.74584	-0.145569
enh_184135	TGCTAGAATATAAGCTTTCCAAGAGTGGTGTCCTTGTCTGTCTTCTTCATCATTGCATCCCTAGGACCTGTAAAGTGTCTAGCACATATAGTAGCACATTCTAAATATTTGTTTAATGCACGCATGAAGGGAAGGACATTCTAGACAGATGGGAGAGCATGAGATAAAAGTACAGAGTGTGTATTGGCAGAGATAAGTGA	030	Test Set	-0.217664	4.70644	-0.727144
enh_300591	GTTCAGGAGGAAGCCCAAATACCAGGTGGACCGTGGAGAAAATCTTTTGCCCGTTGCCAACAGATGAACTATTTTCCCAATGTGCGGGAGATATTGAGTTAGTCATAAACGCAGCAATGTGTTAATCATGTTGACGTTATCAGGATACGGCTATCTTTTTAAGTGTTTGCTGTGTGCTGGGTTATCTGTCATGAACTGCT	030	Test Set	0.436225	4.67695	0.0619396
enh_184136	TGCTAGAATATAAGCTTTCCAAGAGTGGTGTCCTTGTCTGTCTTCTTCATCATTGCATCCCTAGGACCTGTAAAGTGTCTAGCACATATAGTAGCACATGCTAAATATTTGTTTAATGCACGCATGAAGGGAAGGACATTCTAGACAGATGGGAGAGCATGAGATAAAAGTACAGAGTGTGTATTGGCAGAGATAAGTGA	030	Test Set	-0.290243	4.62372	-0.844684
enh_187608	TGACTTCTGGGTGCCCCAGAAATAGACCTCTCCTGTAGAGTGGTGATATACAGAATGAGTTTCAGTTTGCATTGCAGCTGGGATTGAAAGTAATCAGTCATGAGCAGGCAGGCAGGAGGTCCTGTTAGCCCTGCCTTCCAGGAAGGTTGGGGTGGGAGTTTTGAGTGGGAAAGAGGATGACATGTGTGAGAGAGTTCTGA	030	Test Set	0.297066	4.36506	0.322653
enh_791164	TCCCCTTGACTCCCAGTTCAGCCTTGAACTTCTGGGGCCTCATCTTGCTGTGGTTCAAGTCTTTGGAGGTATGAGAATAGAGGGAGCCATGATGTCACTCCAAGTGTCTAATAGATGAACTTCCAGGAGAAGATGTCTTTATCTTTGACCTTCTGGCTTATCTGAAGAGTACAGACTCTTAGGAAAACCTCTCTTAAGTA	030	Test Set	-0.663209	4.30317	-0.31964
enh_55054	CTTGGACCCAAGCGTGTCTAGTGGGTAACAGTTATTTACAGGAAGAGGTGGCAGTGTGGCCCCACATCTGCTTTGCACTGATATTTCTCCCTTAGCAGATAAGCATTCTGGTCTGGTTCGTATATAGGTCAGTTTGATGTGTTGATATGAACTGAAAATGAACCATAGGTACACTACAGTCCCATTCAAGGTGACCCTAA	030	Test Set	-0.190802	4.08383	-0.68453
enh_309151	TAATCTTGCCAGCAGGGCTTCAACTTCGGGAACTGATTCATTTTTAGAAAAAGAGCCAAGAAGTTCCGTTTCCTTTTTTCTGTTGCTTTCTACATTACACGCTTCCTTCTTCTCAGCTGCCTTGATCCTCCCAGTAGACGTATGAGTGTCTAGATTATAATTAAGCTCCTTGGCGACTGGAGTCCTTGTTGAGTTGCAAT	003	Test Set	0.205864	0.978154	1.28047
enh_388300	TTCCTTTCCTGGCATGTGATGTAGTGGGATACTTCCTGATTGTAACCCTTCACCTCCATGGAAACAAGCTCCCTCATGGGAGGCAGGCAATAACTTTTTTTTCCTTCCACTTCCTCATATGAAACTTCAAGATAATAAAAGAGGCAACTATTCAGAGTCTAATTACATCGAAGGGAAGTCCTGGGATGGCTGATTAAAAT	003	Test Set	0.633064	2.29545	1.44925
enh_406666	CAACTTTTAAGTTCTACTCTCCATAACCACCTCAATGAATATTTCCTCCAGTATGTTTTACATGTGGAAAATGTGAAGAAATTCTATTTTTATCTTTCATGGTGTTTAGATTCTTTTGACTTAAGAAATGACTATATCCAAATGGAATTTGAGATATTACTACTTTATTAAAAGGGGGGGCCGGGCGCAGTGGCTCAATC	003	Test Set	-0.120413	-0.13096	5.07557
enh_421782	CAGCTGCCTGGGACTGAGGAAGTGGAAACTTTGAATGTGAACATCTCCTTTGAGAAGCTTGGCAGTTAAAGATGAGGTCAGAGATAGACACTGGGCAGGAACACATTTTTATAGCACAAAAAACTCTGGGTCCACAGTGGCCTTGGGAGCATTCTGGTACTCCCTCTAATGGCAGGAGCTGGGGTGCTGGGTGTGGGTGC	003	Test Set	0.341597	1.92355	2.01669
enh_470389	CGGCCAATGTATATATTTTTTCAAGACAGCTCAACCCAAAGTAGCACCAGCATGGACAGGCCGAGTGACGAAGACAGTGCTGGAGGCACACAGAGGCTGTGGGGGCAAGTATGCGGCCGGCTGGACCTTCGGGGACCCTGCCCGTGGCTGGAAAGGGGACCAGGGGGTCCCTGGGAAACACAGGGCTCTGACCTCTGTGC	003	Test Set	0.447781	0.249351	0.466724
enh_484964	CCCCTCCGCGTCTCCTGTAGACGCTCTGCTCAGGATGCGGGGCGCAGGACAGGCGCTTCCTGGCCTCAGCGTGGGGTGGCCCGGCCGCTTCTGGAAGACTCCTGGCGCTGTCCCCCGCCTCCCCGGGCTGTCACTGCCGACTCGGGCCTGCCCATCTCCCGCAGGGGCGCTCGGGCCTGGCCGCCAAGCTGGGCGAGAGG	003	Test Set	0.770981	0.582136	1.92829
enh_553036	AGGATTTTGGGAGGCCGAGGCAGGCGGATCACGGGATCAGGAGATCGAGACCATCCTGGCTAATGTGGTGAAACCCCGTCTCTACTAAAAATACAAAAATTTAGCCGGGCGTGGTGGCGGGCGCCTGAGTCCCAGCCACTCGGGAGGCTGAGGCAGGAGAATGGCGTGAACCCGGGAGGCAGAGCTTGCAGTGAGCCGAG	003	Test Set	0.758169	0.451458	0.689766
enh_589679	AGAGTATGTTATCAATTCTCAAGCCTAGGAGAAGTCAGGAGTGGAGAACAGCTCTGAGAAGATACTGTTGTCCAACTGATCTCCAGGCACCACGGAGTCTGGTCCCTCCAATCAGGAAGGTCGGAATCTCTGATGTCATCGTTCATGCCAACCTGGCAACCAGTTTGAAAAAAAACACATGTAACTGCCAGGCTGATCTC	003	Test Set	0.740496	-0.0212057	2.15438
enh_714852	CTCCGGGCTCACAGCCAACCTGCTGGCACGGCTCGAGGACTCCGGGCTCACAGCCAACCTGCTGGCACGGCCGCCCTTTCCCGCCCTGCCTCGGGTGAGCCAAGGACTTGTCTTCTGCTTCCTGGGTTCCTGAAAGAGCTCTCCTCTGATTTCTCAAAGGCAAAATAAAACTCAGATTTAAGTCTTTGGTGCGTAGCCCC	003	Test Set	0.207137	-0.265569	1.8721
enh_752169	GGCTATTACTTGAATGATTCAGAGACCTCAGTTTCTGCATGGCATCTGAAGGGACTTCAGGAATTCGAGGTTGGTGGATGATTGTACCATCATCACTGCATATTTGGGATTTTTGTGCTATTATACCGAGGGTTGTATAGCATCTTCCTAGCAACTTCTTTCTAGTTTATTGCCACTATTGCAAATGTCAGATCTCAAGA	003	Test Set	-0.358959	-0.312756	3.04497
enh_755421	GGAGCCCTTGCAGAGCCCTCTCTCCAGTCGCCGCCGGGGCCCTTGGCCGTCGAAGGAGGTGCTTCTCGCGGAGACCGCGGGACCCGCCGTGCCGAGCCGGGAGGGCCGTAGGGGCCCTGAGATGCCGAGCGGTGCCCGGGCCCGCTTACGTGCACCGCTTGCTCCGAGCCGCGGGGTCCGCCTGCTAGGCCTGCGGAAAA	003	Test Set	0.472153	0.543228	1.31982

## Sheet: README
Supplemental Table S8: Synthetic human enhancer sequences generated by other methods, for comparison with regLM.
